# Supplementary material for: A Mighty Small Heart: The Cardiac Proteome of Adult Drosophila melanogaster
Source: PLoS One. 2011 Apr 25;6(4):e18497. doi: 10.1371/journal.pone.0018497 (PMC3081823; doi:10.1371/journal.pone.0018497)
Supplement: Table S1 — Proteins & Peptides Panel 1: Read Me covers caveats associated with using these table(s) Panel 2: List of 1228 protein clusters, with identification probability and other buttressing peptide information. Panel 3: List of all peptides identified and associated with given protein isoform or protein cluster. Panel 4: List of all unique (non-redundant) peptides identified in this study. Panel 5: List of human homologues of identified Drosophila protein clusters. Homologues were found using batch searches of Homologene and Ensemble Compara databases. Panel 6: Distribution of spectra among the 4 technical replicates associated with the identified proteins. (XLSX) [file pone.0018497.s001.xlsx]

## Sheet: Read Me!
Using These Tables
Caveats and Limitations
1. Protein identification with multiple gi accession numbers (Protein Clusters)
	There are two principal reasons why an identified protein may have more than one gi accesssion number:
	1. The Scaffold program groups all proteins that can be identified by a minimal set of peptides. As a result, multiple protein isoforms, each with its on accession number, may be grouped together. Consequently, if a specfic isoform is named in the list users should should check for alternate accession numbers denoting indistinguishable isoforms. Only protein isoforms identified by a unique spectr…
	2. A protein with identical sequence may be associated with more than one accession number.
2. Protein Probabilities
	The protein list herein includes entries listed with 50% identification probability, according to Protein Prophet, as implemented by Scaffold. Indeed, upon curation nearly 50% of the provisionally-accepted single-hit proteins failed to meet any of the 3 criteria for final acceptance outlined in the online methods supplement. The remaining proteins have at least one peptide identified with 90% pro…
3. ID Mapping to UniprotKB
	For the purposes or extracting functional annotation, gi numbers were mapped to their corresponding entries in the UniProtKB database.
	If identified proteins were identified by multiple gi accession numbers, a single accession was chosen for mapping.
	Therefore, Uniprot Accessions may denote specific isoforms which may or may not have been identified uniquely by the mass spectral data.
	This does not adversely affect Gene Ontology annotation, but end-users are cautioned not to use UniprotKB Accessions as evidence that a specific isoform has been identified.
	Always refer back to the original Protein and Peptide identificaton lists to determine whether a specific isoform has been identified.
4. Identification of Human Homologues
	Currently available batch homology search sites use UniprotKB Accessions rather than gi Accessions for input lists.
	Mapping gi to UniprotKB comes with its own caveats (see above).						.
	Human homologues of Drosophila proteins were retrieved from Homologene and Ensemble Compara databases
	These searches are intended to identiify the closest functional relative across species. Owing to the potential compounding issues of ID-mapping and cross-species searching, users are cautioned not to place undue emphasis on specific human isoforms.
	For cross-species experimental design inspired by the Drosophila data, users are encouraged to chose peptide sequences of interest and perform BLAST searches.

## Sheet: Proteins 
Drosophila Dec 09_Condensed, Samples report created on 01/06/2010
Database Set:
	Database Name: D:\Databases\drosophila\drosophila_refseq_092408.fasta
		Version: Custom: All D. melanogaster Refseq entries as of 092408
		Taxonomy: Drosophila melanogaster
		Number of Proteins: 20735
Search Engine Set: 2 Search Engines
	Search Engine: Mascot
		Version: Mascot
		Samples: All Samples
		Fragment Tolerance: 0.80 Da (Monoisotopic)
		Parent Tolerance: 1.5 Da (Monoisotopic)
		Fixed Modifications: +57 on C (Carbamidomethyl)
		Variable Modifications: +16 on M (Oxidation)
		Database: Drosophila_20080924.fasta (custom version, 20735 entries)
		Digestion Enzyme: Trypsin
		Max Missed Cleavages: 3
	Search Engine: X! Tandem
		Version: 2007.01.01.1
		Samples: All Samples
		Fragment Tolerance: 0.80 Da (Monoisotopic)
		Parent Tolerance: 1.5 Da (Monoisotopic)
		Fixed Modifications: +57 on C (Carbamidomethyl)
		Variable Modifications: +16 on M (Oxidation)
		Database: D:\Databases\drosophila\drosophila_refseq_092408.fasta (custom, 20735 entries)
		Digestion Enzyme: Trypsin
		Max Missed Cleavages: 2
Scaffold Version: Scaffold_2_05_02
	Peptide Thresholds: 90.0% minimum
	Protein Thresholds: 50.0% minimum and 1 peptide minimum
#	Starred?	Identified Proteins (1228)	Accession Number	Molecular Weight	Protein Grouping Ambiguity	Protein ID Probability (%)	Unique Peptides	Unique Spectra	Total Spectra	% Sequence Coverage	% of Total Spectra
275	TRUE	Myosin heavy chain CG17927-PA, isoform A [Drosophila melanogaster]	gi|24584704 (+1)	225 kDa	FALSE	100	128	186	2330	54.9	1.09
1073	TRUE	bent CG32019-PA, isoform A [Drosophila melanogaster]	gi|28558739 (+1)	1001 kDa	FALSE	100	118	128	787	19.2	0.368
890	TRUE	terribly reduced optic lobes CG33950-PF, isoform F [Drosophila melanogaster]	gi|78706474	513 kDa	FALSE	100	89	107	871	23.7	0.408
898	TRUE	sallimus CG1915-PC, isoform C [Drosophila melanogaster]	gi|161080703	2066 kDa	FALSE	100	83	86	363	6.14	0.17
42	FALSE	CG32702 CG32702-PA [Drosophila melanogaster]	gi|24640838	411 kDa		100	55	57	276	17.5	0.129
622	FALSE	Papilin CG33103-PA, isoform A [Drosophila melanogaster]	gi|28572036	313 kDa		100	51	58	438	22.8	0.205
519	TRUE	Muscle-specific protein 300 CG33715-PD, isoform D [Drosophila melanogaster]	gi|161076705	1405 kDa	FALSE	100	45	45	109	4.78	0.051
48	FALSE	Laminin A CG10236-PA [Drosophila melanogaster]	gi|17136292	411 kDa		100	44	48	274	16	0.128
496	FALSE	alpha Spectrin CG1977-PA [Drosophila melanogaster]	gi|17136504	278 kDa		100	40	44	127	20.7	0.0594
568	TRUE	Paramyosin CG5939-PA, isoform A [Drosophila melanogaster]	gi|24661112 (+1)	102 kDa	FALSE	100	39	51	578	49.4	0.27
528	FALSE	CG1516 CG1516-PE, isoform E [Drosophila melanogaster]	gi|19921944 (+8)	131 kDa		100	36	39	469	34.2	0.219
54	FALSE	zormin CG33484-PD, isoform D [Drosophila melanogaster]	gi|116007762	411 kDa		100	35	37	226	13.1	0.106
874	FALSE	Calcium ATPase at 60A CG3725-PA, isoform A [Drosophila melanogaster]	gi|17136664 (+7)	110 kDa		100	34	42	581	34	0.272
604	TRUE	alpha actinin CG4376-PC, isoform C [Drosophila melanogaster]	gi|17137758	106 kDa	FALSE	100	31	34	241	38.1	0.113
719	FALSE	Laminin B2 CG3322-PA [Drosophila melanogaster]	gi|17737557	182 kDa		100	30	31	130	24.1	0.0608
263	FALSE	rhea CG6831-PA [Drosophila melanogaster]	gi|21355751	307 kDa		100	28	28	106	14.6	0.0496
626	FALSE	Aconitase CG9244-PB, isoform B [Drosophila melanogaster]	gi|17864292	85 kDa		100	27	37	473	41.7	0.221
991	FALSE	bellwether CG3612-PA [Drosophila melanogaster]	gi|24658560	59 kDa		100	27	35	476	41.1	0.223
270	FALSE	CG4389 CG4389-PB, isoform B [Drosophila melanogaster]	gi|24583077 (+1)	80 kDa		100	27	31	210	42.3	0.0983
282	FALSE	Clathrin heavy chain CG9012-PE, isoform E [Drosophila melanogaster]	gi|161077848 (+5)	191 kDa		100	27	27	138	19.6	0.0646
882	FALSE	Cytochrome P450-4g1 CG3972-PA [Drosophila melanogaster]	gi|17933498	63 kDa		100	24	31	601	39	0.281
570	TRUE	Larval serum protein 1 gamma CG6821-PA [Drosophila melanogaster]	gi|17647601	93 kDa	FALSE	100	24	29	120	31	0.0561
418	FALSE	Na pump alpha subunit CG5670-PA, isoform A [Drosophila melanogaster]	gi|24648576 (+6)	116 kDa		100	24	29	209	30.6	0.0978
1	FALSE	beta Spectrin CG5870-PA [Drosophila melanogaster]	gi|17647191	266 kDa		100	23	25	77	13.8	0.036
821	FALSE	Laminin B1 CG7123-PA, isoform A [Drosophila melanogaster]	gi|17136294 (+1)	198 kDa		100	23	25	131	16.3	0.0613
862	FALSE	CG3523 CG3523-PA [Drosophila melanogaster]	gi|19920632	266 kDa		100	22	22	105	12.1	0.0491
1147	FALSE	Fat body protein 1 CG17285-PA, isoform A [Drosophila melanogaster]	gi|24664081 (+1)	120 kDa		100	22	30	257	25.2	0.12
295	TRUE	Tropomyosin 1 CG4898-PD, isoform D [Drosophila melanogaster]	gi|24647073 (+2)	33 kDa	FALSE	100	22	29	116	55.1	0.0543
671	FALSE	Unc-89 CG33519-PB, isoform B [Drosophila melanogaster]	gi|161077453 (+1)	469 kDa		100	22	22	65	7.44	0.0304
179	TRUE	Tropomyosin 2 CG4843-PB, isoform B [Drosophila melanogaster]	gi|24647095 (+1)	33 kDa	FALSE	100	21	29	131	56.7	0.0613
45	FALSE	CG11198 CG11198-PC, isoform C [Drosophila melanogaster]	gi|161076407 (+3)	262 kDa		100	20	20	52	10.5	0.0243
223	FALSE	Tiggrin CG11527-PA [Drosophila melanogaster]	gi|17136984	257 kDa		100	20	20	36	10.7	0.0168
35	FALSE	Arginine kinase CG32031-PA, isoform A [Drosophila melanogaster]	gi|24661336 (+1)	61 kDa		100	19	24	143	50.2	0.0669
1218	FALSE	CG7461 CG7461-PA [Drosophila melanogaster]	gi|24655582	71 kDa		100	19	21	96	34.5	0.0449
963	FALSE	Neural conserved at 73EF CG11661-PI, isoform I [Drosophila melanogaster]	gi|161084461	123 kDa		100	19	20	218	21.9	0.102
974	FALSE	CG32092 CG32092-PB [Drosophila melanogaster]	gi|24662922	283 kDa		100	18	19	88	8.09	0.0412
1031	FALSE	CG4169 CG4169-PA [Drosophila melanogaster]	gi|24665395	45 kDa		100	18	22	151	57.7	0.0706
303	FALSE	Cytochrome P450 reductase CG11567-PA, isoform A [Drosophila melanogaster]	gi|17137192	76 kDa		100	18	20	177	32.1	0.0828
1130	TRUE	Glutamate dehydrogenase CG5320-PA, isoform A [Drosophila melanogaster]	gi|45549226	63 kDa	FALSE	100	18	19	156	33.3	0.073
385	FALSE	stress-sensitive B CG16944-PA, isoform A [Drosophila melanogaster]	gi|18079273 (+1)	33 kDa		100	18	26	349	50.5	0.163
868	FALSE	viking CG16858-PA [Drosophila melanogaster]	gi|17137252	194 kDa		100	18	19	190	10.3	0.0889
713	FALSE	ATP synthase-beta CG11154-PA, isoform A [Drosophila melanogaster]	gi|24638766	54 kDa		100	17	26	585	45.7	0.274
928	TRUE	Heat shock protein cognate 3 CG4147-PA, isoform A [Drosophila melanogaster]	gi|24641402 (+3)	72 kDa	FALSE	100	17	21	185	31.4	0.0866
356	TRUE	Lamin C CG10119-PA [Drosophila melanogaster]	gi|24653664	70 kDa	FALSE	100	17	18	59	33	0.0276
379	TRUE	upheld CG7107-PF, isoform F [Drosophila melanogaster]	gi|62473664	47 kDa	FALSE	100	17	23	236	40.5	0.11
674	FALSE	Vinculin CG3299-PA [Drosophila melanogaster]	gi|17136646	106 kDa		100	17	18	99	22.3	0.0463
750	FALSE	Aldehyde dehydrogenase CG3752-PA [Drosophila melanogaster]	gi|20129399	57 kDa		100	16	20	178	34	0.0833
461	FALSE	CG3415 CG3415-PA [Drosophila melanogaster]	gi|18859837	64 kDa		100	16	18	76	32.8	0.0356
243	FALSE	CG6206 CG6206-PA, isoform A [Drosophila melanogaster]	gi|19921088	123 kDa		100	16	18	68	18.1	0.0318
383	FALSE	Heat shock protein 60 CG12101-PA, isoform A [Drosophila melanogaster]	gi|24641191 (+1)	61 kDa		100	16	17	54	34	0.0253
1029	TRUE	Actin 87E CG18290-PA, isoform A [Drosophila melanogaster]	gi|17137090 (+1)	42 kDa	FALSE	100	15	24	417	42.3	0.195
664	FALSE	CG3731 CG3731-PB, isoform B [Drosophila melanogaster]	gi|21357875 (+1)	52 kDa		100	15	19	116	40.9	0.0543
644	TRUE	Glutactin CG9280-PA, isoform A [Drosophila melanogaster]	gi|17137794 (+2)	119 kDa	FALSE	100	15	16	148	19.1	0.0692
481	FALSE	Protein disulfide isomerase CG6988-PA, isoform A [Drosophila melanogaster]	gi|17647799	56 kDa		100	15	16	73	34.1	0.0342
691	FALSE	Ribosomal protein S3 CG6779-PA [Drosophila melanogaster]	gi|17136324	27 kDa		100	15	16	63	64.2	0.0295
632	FALSE	Aldolase CG6058-PF, isoform F [Drosophila melanogaster]	gi|24650276 (+7)	43 kDa		100	14	14	57	46.8	0.0267
985	FALSE	aralar1 CG2139-PC, isoform C [Drosophila melanogaster]	gi|24651387 (+3)	77 kDa		100	14	15	61	23.1	0.0285
1112	FALSE	ATP synthase-gamma chain CG7610-PA, isoform A [Drosophila melanogaster]	gi|24651125 (+2)	33 kDa		100	14	17	98	51.2	0.0459
806	FALSE	Isocitrate dehydrogenase CG7176-PC, isoform C [Drosophila melanogaster]	gi|21356561 (+6)	53 kDa		100	14	15	35	31.3	0.0164
663	FALSE	NADH:ubiquinone reductase 75kD subunit precursor CG2286-PA, isoform A [Drosophila melanogaster]	gi|24640557 (+1)	79 kDa		100	14	17	68	27.4	0.0318
514	FALSE	pericardin CG5700-PB [Drosophila melanogaster]	gi|24663043	163 kDa		100	14	18	215	11.4	0.101
419	FALSE	CG7145 CG7145-PA, isoform A [Drosophila melanogaster]	gi|24668413 (+2)	64 kDa		100	13	13	55	27.9	0.0257
545	FALSE	CG7998 CG7998-PA [Drosophila melanogaster]	gi|24647881	35 kDa		100	13	16	156	36.6	0.073
76	TRUE	CG9090 CG9090-PA [Drosophila melanogaster]	gi|24656137	41 kDa	FALSE	100	13	16	119	29.9	0.0557
563	FALSE	flotillin CG8200-PA, isoform A [Drosophila melanogaster]	gi|17137546	47 kDa		100	13	14	28	36.4	0.0131
1203	TRUE	Heat shock protein cognate 4 CG4264-PA, isoform A [Drosophila melanogaster]	gi|17737967 (+5)	71 kDa	FALSE	100	13	15	105	30.4	0.0491
687	FALSE	v(2)k05816 CG3524-PA [Drosophila melanogaster]	gi|24581345	266 kDa		100	13	13	30	7.93	0.014
1000	FALSE	yippee interacting protein 2 CG4600-PA [Drosophila melanogaster]	gi|17648125	42 kDa		100	13	16	82	39.9	0.0384
31	TRUE	Zeelin1 CG6803-PB, isoform B [Drosophila melanogaster]	gi|21357797	42 kDa	FALSE	100	13	14	71	40.5	0.0332
1211	FALSE	CG11963 CG11963-PB, isoform B [Drosophila melanogaster]	gi|161078106 (+1)	55 kDa		100	12	12	179	25.9	0.0837
611	FALSE	CG12262 CG12262-PA [Drosophila melanogaster]	gi|24660351	46 kDa		100	12	13	112	36.3	0.0524
85	TRUE	CG30084 CG30084-PF, isoform F [Drosophila melanogaster]	gi|161077121 (+1)	238 kDa	FALSE	100	12	13	100	14.2	0.0468
825	FALSE	CG7470 CG7470-PA [Drosophila melanogaster]	gi|21357643	84 kDa		100	12	16	101	21	0.0473
908	FALSE	Glutamate oxaloacetate transaminase 2 CG4233-PC, isoform C [Drosophila melanogaster]	gi|19920542	44 kDa		100	12	16	88	37.2	0.0412
66	TRUE	Glycoprotein 93 CG5520-PA [Drosophila melanogaster]	gi|21357739	90 kDa	FALSE	100	12	15	116	19.6	0.0543
1060	FALSE	knockdown CG3861-PB, isoform B [Drosophila melanogaster]	gi|24640124 (+1)	58 kDa		100	12	15	71	30.6	0.0332
90	TRUE	lethal (2) 01289 CG9432-PD, isoform D [Drosophila melanogaster]	gi|116007558 (+1)	212 kDa	FALSE	100	12	12	102	8.89	0.0477
1163	FALSE	lethal (2) 44DEa CG8732-PD, isoform D [Drosophila melanogaster]	gi|62471689 (+8)	81 kDa		100	12	12	107	24	0.0501
551	FALSE	Nidogen/entactin CG12908-PA, isoform A [Drosophila melanogaster]	gi|24652408 (+1)	149 kDa		100	12	12	41	10.1	0.0192
927	FALSE	porin CG6647-PA, isoform A [Drosophila melanogaster]	gi|17136632 (+2)	31 kDa		100	12	17	129	44	0.0604
268	FALSE	Annexin IX CG5730-PB, isoform B [Drosophila melanogaster]	gi|17136264 (+3)	36 kDa		100	11	14	61	32.7	0.0285
591	TRUE	CG10097 CG10097-PB, isoform B [Drosophila melanogaster]	gi|78706758	57 kDa	FALSE	100	11	14	80	27.1	0.0374
958	FALSE	CG6455 CG6455-PA, isoform A [Drosophila melanogaster]	gi|45549224	94 kDa		100	11	11	49	15.6	0.0229
377	FALSE	ERp60 CG8983-PA, isoform A [Drosophila melanogaster]	gi|45551086	55 kDa		100	11	12	72	28	0.0337
420	TRUE	flotillin 2 CG32593-PB, isoform B [Drosophila melanogaster]	gi|24642031 (+1)	47 kDa	FALSE	100	11	11	32	33.9	0.015
596	FALSE	lethal (1) G0156 CG12233-PA, isoform A [Drosophila melanogaster]	gi|24643268 (+1)	39 kDa		100	11	11	132	32.9	0.0618
335	FALSE	lethal (1) G0334 CG7010-PC, isoform C [Drosophila melanogaster]	gi|24639740 (+2)	49 kDa		100	11	11	33	26.8	0.0154
613	FALSE	midline fasciclin CG3359-PB, isoform B [Drosophila melanogaster]	gi|24646161 (+14)	91 kDa		100	11	11	29	15	0.0136
446	FALSE	Myosin light chain 2 CG2184-PA, isoform A [Drosophila melanogaster]	gi|17933672	24 kDa		100	11	15	196	51.8	0.0917
847	TRUE	Ribosomal protein S9 CG3395-PA, isoform A [Drosophila melanogaster]	gi|24661707 (+1)	23 kDa	FALSE	100	11	11	34	48.2	0.0159
764	FALSE	Succinyl coenzyme A synthetase flavoprotein subunit CG17246-PA, isoform A [Drosophila melanogaster]	gi|17137288 (+2)	72 kDa		100	11	14	78	25	0.0365
326	FALSE	alpha-Tubulin at 84B CG1913-PA [Drosophila melanogaster]	gi|17136564 (+2)	50 kDa		100	10	11	84	28.7	0.0393
164	FALSE	Catalase CG6871-PA [Drosophila melanogaster]	gi|17981717	57 kDa		100	10	11	74	26.3	0.0346
1223	FALSE	CG12140 CG12140-PA [Drosophila melanogaster]	gi|24652256	66 kDa		100	10	12	51	22	0.0239
1101	FALSE	CG6782 CG6782-PE, isoform E [Drosophila melanogaster]	gi|78706744 (+3)	34 kDa		100	10	10	28	25.9	0.0131
34	FALSE	CG7910 CG7910-PA [Drosophila melanogaster]	gi|24644968	58 kDa		100	10	10	90	21.1	0.0421
147	FALSE	CG7920 CG7920-PA, isoform A [Drosophila melanogaster]	gi|21358615	52 kDa		100	10	12	100	26.2	0.0468
318	FALSE	CG9297 CG9297-PA, isoform A [Drosophila melanogaster]	gi|28571703 (+1)	104 kDa		100	10	11	40	14.8	0.0187
605	FALSE	Glycogenin CG9480-PA, isoform A [Drosophila melanogaster]	gi|45550476	49 kDa		100	10	10	39	35.3	0.0182
1228	FALSE	Oligomycin sensitivity-conferring protein CG4307-PA, isoform A [Drosophila melanogaster]	gi|24647054	22 kDa		100	10	13	64	45.5	0.0299
1115	FALSE	Pyruvate kinase CG7070-PB, isoform B [Drosophila melanogaster]	gi|24648964 (+1)	55 kDa		100	10	12	38	22.3	0.0178
658	TRUE	Vha68-2 CG3762-PA, isoform A [Drosophila melanogaster]	gi|24583984 (+2)	68 kDa	FALSE	100	10	10	34	20.5	0.0159
989	TRUE	26-29kD-proteinase CG8947-PA [Drosophila melanogaster]	gi|20428641	62 kDa	FALSE	100	9	10	83	15.7	0.0388
58	TRUE	alpha-Adaptin CG4260-PA, isoform A [Drosophila melanogaster]	gi|28574818 (+1)	106 kDa	FALSE	100	9	9	35	9.87	0.0164
77	FALSE	CG11876 CG11876-PD, isoform D [Drosophila melanogaster]	gi|21358145 (+1)	39 kDa		100	9	12	71	22.7	0.0332
105	FALSE	CG16935 CG16935-PA [Drosophila melanogaster]	gi|45550423	39 kDa		100	9	9	24	29.1	0.0112
716	FALSE	CG5703 CG5703-PA [Drosophila melanogaster]	gi|18859877	27 kDa		100	9	9	37	38.8	0.0173
171	FALSE	CG7356 CG7356-PB, isoform B [Drosophila melanogaster]	gi|24582659	87 kDa		100	9	9	19	14.5	0.00889
748	FALSE	CG7430 CG7430-PA [Drosophila melanogaster]	gi|21358499	53 kDa		100	9	11	34	24.6	0.0159
749	FALSE	Ef1gamma CG11901-PA, isoform A [Drosophila melanogaster]	gi|24651001 (+1)	49 kDa		100	9	12	57	22.7	0.0267
1206	TRUE	fau CG6544-PA, isoform A [Drosophila melanogaster]	gi|45550732	69 kDa	FALSE	100	9	11	44	19.7	0.0206
393	FALSE	Glycogen phosphorylase CG7254-PA, isoform A [Drosophila melanogaster]	gi|24581010 (+1)	97 kDa		100	9	9	38	13.6	0.0178
444	FALSE	Heat shock protein cognate 5 CG8542-PA [Drosophila melanogaster]	gi|24653595	74 kDa		100	9	9	38	19.1	0.0178
665	FALSE	lethal (1) G0255 CG4094-PA, isoform A [Drosophila melanogaster]	gi|24640177 (+1)	54 kDa		100	9	10	30	24.8	0.014
962	FALSE	lethal (2) 37Cc CG10691-PA, isoform A [Drosophila melanogaster]	gi|24585145 (+1)	30 kDa		100	9	9	18	43.8	0.00842
1157	FALSE	Muscle LIM protein at 84B CG1019-PA, isoform A [Drosophila melanogaster]	gi|17137134 (+1)	54 kDa		100	9	9	43	23	0.0201
456	FALSE	Receptor of activated protein kinase C 1 CG7111-PA [Drosophila melanogaster]	gi|17137396	36 kDa		100	9	13	29	28	0.0136
1014	FALSE	Ribosomal protein L4 CG5502-PA [Drosophila melanogaster]	gi|24650747	45 kDa		100	9	9	19	22.9	0.00889
722	FALSE	Ribosomal protein LP0 CG7490-PA [Drosophila melanogaster]	gi|17737731	34 kDa		100	9	9	43	34.7	0.0201
459	FALSE	Ribosomal protein S4 CG11276-PA, isoform A [Drosophila melanogaster]	gi|24663668 (+1)	29 kDa		100	9	10	37	34.5	0.0173
387	FALSE	Succinate dehydrogenase B CG3283-PA [Drosophila melanogaster]	gi|17137106	34 kDa		100	9	9	39	27.3	0.0182
535	FALSE	Succinyl coenzyme A synthetase alpha subunit CG1065-PA [Drosophila melanogaster]	gi|28574296	34 kDa		100	9	9	99	31.4	0.0463
505	TRUE	wings up A CG7178-PA, isoform A [Drosophila melanogaster]	gi|24642961	24 kDa	FALSE	100	9	11	39	33.7	0.0182
964	FALSE	Annexin X CG9579-PA [Drosophila melanogaster]	gi|17136288	36 kDa		100	8	8	21	29.7	0.00983
878	FALSE	ATP synthase, subunit d CG6030-PA, isoform A [Drosophila melanogaster]	gi|17738043 (+1)	20 kDa		100	8	10	36	40.4	0.0168
608	FALSE	cathD CG1548-PA [Drosophila melanogaster]	gi|21355083	42 kDa		100	8	9	32	29.3	0.015
602	FALSE	CG10924 CG10924-PA, isoform A [Drosophila melanogaster]	gi|24655082	71 kDa		100	8	8	21	15.4	0.00983
479	TRUE	CG13091 CG13091-PA [Drosophila melanogaster]	gi|19920962	59 kDa	FALSE	100	8	8	37	20.5	0.0173
190	TRUE	CG1640 CG1640-PA, isoform A [Drosophila melanogaster]	gi|24641760 (+5)	63 kDa	FALSE	100	8	8	25	17	0.0117
549	FALSE	CG17896 CG17896-PB, isoform B [Drosophila melanogaster]	gi|24638876 (+1)	56 kDa		100	8	8	16	22.1	0.00749
1041	FALSE	CG3074 CG3074-PA, isoform A [Drosophila melanogaster]	gi|24657813 (+1)	49 kDa		100	8	13	44	21.3	0.0206
167	FALSE	CG3902 CG3902-PA [Drosophila melanogaster]	gi|24666513	45 kDa		100	8	9	54	21.7	0.0253
526	FALSE	CG4769 CG4769-PA [Drosophila melanogaster]	gi|24658292	34 kDa		100	8	10	37	28.7	0.0173
293	FALSE	CG5261 CG5261-PB, isoform B [Drosophila melanogaster]	gi|20129315	54 kDa		100	8	8	69	17	0.0323
430	TRUE	CG6416 CG6416-PB, isoform B [Drosophila melanogaster]	gi|45550577	33 kDa	FALSE	100	8	9	33	33.9	0.0154
819	FALSE	CG6543 CG6543-PA, isoform A [Drosophila melanogaster]	gi|20129971 (+1)	32 kDa		100	8	9	97	34.6	0.0454
386	FALSE	CG7834 CG7834-PA, isoform A [Drosophila melanogaster]	gi|24651145 (+1)	27 kDa		100	8	9	46	35.6	0.0215
651	FALSE	CG8888 CG8888-PA [Drosophila melanogaster]	gi|19922066	43 kDa		100	8	8	64	21.1	0.0299
941	TRUE	CG9140 CG9140-PA [Drosophila melanogaster]	gi|19920794	52 kDa	FALSE	100	8	8	22	17.9	0.0103
312	FALSE	Collagen type IV CG4145-PA, isoform A [Drosophila melanogaster]	gi|24581820 (+2)	174 kDa		100	8	9	103	5.85	0.0482
6	FALSE	coracle CG11949-PA, isoform A [Drosophila melanogaster]	gi|24655527	184 kDa		100	8	10	43	7.3	0.0201
1069	FALSE	Cysteine proteinase-1 CG6692-PC, isoform C [Drosophila melanogaster]	gi|24653514 (+2)	42 kDa		100	8	8	104	28.2	0.0487
225	FALSE	Ect3 CG3132-PA [Drosophila melanogaster]	gi|24646169	72 kDa		100	8	8	41	15.1	0.0192
402	TRUE	Glyceraldehyde 3 phosphate dehydrogenase 1 CG12055-PA, isoform A [Drosophila melanogaster]	gi|22023983 (+1)	35 kDa	FALSE	100	8	9	67	27.4	0.0313
792	FALSE	lethal (2) k05713 CG8256-PD, isoform D [Drosophila melanogaster]	gi|161077125 (+3)	80 kDa		100	8	9	21	13.3	0.00983
226	TRUE	Mitochondrial phosphate carrier protein CG4994-PA, isoform A [Drosophila melanogaster]	gi|24664191 (+1)	39 kDa	FALSE	100	8	12	46	32	0.0215
254	FALSE	Putative Achaete Scute Target 1 CG6148-PA, isoform A [Drosophila melanogaster]	gi|24646379 (+1)	62 kDa		100	8	8	16	17.4	0.00749
655	FALSE	Retinoid- and fatty-acid binding protein CG11064-PA [Drosophila melanogaster]	gi|24638795	373 kDa		100	8	8	17	3.34	0.00795
645	FALSE	Ribosomal protein S16 CG4046-PA [Drosophila melanogaster]	gi|19922746	17 kDa		100	8	8	48	43.9	0.0225
29	FALSE	Rtnl1 CG33113-PF, isoform F [Drosophila melanogaster]	gi|28574660	64 kDa		100	8	8	56	18.5	0.0262
181	FALSE	TER94 CG2331-PA, isoform A [Drosophila melanogaster]	gi|17137560	89 kDa		100	8	8	19	15.1	0.00889
1083	FALSE	Vacuolar H[+]-ATPase 26kD E subunit CG1088-PB, isoform B [Drosophila melanogaster]	gi|17737775 (+1)	26 kDa		100	8	9	22	34.1	0.0103
739	TRUE	14-3-3epsilon CG31196-PA, isoform A [Drosophila melanogaster]	gi|24647885 (+3)	30 kDa	FALSE	100	7	8	30	28.1	0.014
1198	TRUE	ade5 CG3989-PA [Drosophila melanogaster]	gi|18860083	47 kDa		100	7	7	29	18.4	0.0136
89	FALSE	AP-50 CG7057-PA, isoform A [Drosophila melanogaster]	gi|24649014 (+1)	50 kDa		100	7	7	18	22	0.00842
1098	TRUE	beta-Tubulin at 56D CG9277-PB, isoform B [Drosophila melanogaster]	gi|24655737	50 kDa	FALSE	100	7	7	50	20.1	0.0234
454	FALSE	Calreticulin CG9429-PA [Drosophila melanogaster]	gi|24645441	47 kDa		100	7	8	15	25.1	0.00702
556	FALSE	CG11592 CG11592-PA [Drosophila melanogaster]	gi|19920458	57 kDa		100	7	7	27	17.2	0.0126
118	FALSE	CG1970 CG1970-PA [Drosophila melanogaster]	gi|24638644	53 kDa		100	7	8	45	18.2	0.0211
183	FALSE	CG2165 CG2165-PE, isoform E [Drosophila melanogaster]	gi|62473099 (+4)	116 kDa		100	7	7	35	8.5	0.0164
435	FALSE	CG2852 CG2852-PA, isoform A [Drosophila melanogaster]	gi|20130249	22 kDa		100	7	7	39	37.6	0.0182
774	FALSE	CG2918 CG2918-PA [Drosophila melanogaster]	gi|20128923	103 kDa		100	7	7	26	9.32	0.0122
746	FALSE	CG5214 CG5214-PA [Drosophila melanogaster]	gi|24645909	50 kDa		100	7	8	48	18.2	0.0225
111	FALSE	CG9066 CG9066-PA [Drosophila melanogaster]	gi|18859969	28 kDa		100	7	8	38	32.3	0.0178
148	FALSE	Chorion protein 36 CG1478-PA [Drosophila melanogaster]	gi|17530857	30 kDa		100	7	8	33	32.7	0.0154
233	FALSE	Cyclophilin 1 CG9916-PA [Drosophila melanogaster]	gi|45549139	25 kDa		100	7	7	25	25.1	0.0117
729	FALSE	Elongation factor 1alpha48D CG8280-PA, isoform A [Drosophila melanogaster]	gi|17137572 (+1)	50 kDa		100	7	9	89	16.8	0.0416
178	FALSE	Elongation factor 2b CG2238-PA, isoform A [Drosophila melanogaster]	gi|24585709	94 kDa		100	7	7	30	9.48	0.014
564	FALSE	Esterase 6 CG6917-PA [Drosophila melanogaster]	gi|28574499	61 kDa		100	7	8	29	15.6	0.0136
4	FALSE	fondue CG15825-PB, isoform B [Drosophila melanogaster]	gi|20129625	58 kDa		100	7	9	86	15.3	0.0402
683	FALSE	Glutamine synthetase 1 CG2718-PB, isoform B [Drosophila melanogaster]	gi|17136208 (+1)	44 kDa		100	7	8	32	23.3	0.015
141	FALSE	growl CG14648-PB, isoform B [Drosophila melanogaster]	gi|161078016 (+1)	59 kDa		100	7	7	22	18.3	0.0103
859	TRUE	Heat shock protein 83 CG1242-PA [Drosophila melanogaster]	gi|17647529	82 kDa	FALSE	100	7	7	38	12	0.0178
426	FALSE	hu li tai shao CG9325-PA, isoform A [Drosophila melanogaster]	gi|17136738 (+4)	128 kDa		100	7	7	30	15.4	0.014
588	FALSE	Imaginal disc growth factor 4 CG1780-PA, isoform A [Drosophila melanogaster]	gi|24640905 (+1)	49 kDa		100	7	8	21	22.2	0.00983
852	FALSE	inflated CG9623-PB, isoform B [Drosophila melanogaster]	gi|24642641	154 kDa		100	7	8	16	6.23	0.00749
682	FALSE	Limpet CG32171-PB, isoform B [Drosophila melanogaster]	gi|21356031 (+3)	64 kDa		100	7	9	62	17.2	0.029
158	FALSE	myospheroid CG1560-PA [Drosophila melanogaster]	gi|24640486	93 kDa		100	7	7	17	12.2	0.00795
428	FALSE	NADH:ubiquinone reductase 42kD subunit precursor CG6343-PA, isoform A [Drosophila melanogaster]	gi|17933656 (+1)	47 kDa		100	7	7	28	19.7	0.0131
1134	FALSE	Ribosomal protein L26 CG6846-PA [Drosophila melanogaster]	gi|21357853	17 kDa		100	7	8	18	40.9	0.00842
394	FALSE	Ribosomal protein L5 CG17489-PA, isoform A [Drosophila melanogaster]	gi|116007382 (+2)	34 kDa		100	7	11	33	20.9	0.0154
612	FALSE	Ribosomal protein S18 CG8900-PA, isoform A [Drosophila melanogaster]	gi|17136882 (+1)	18 kDa		100	7	7	30	44.7	0.014
582	FALSE	Ribosomal protein S3A CG2168-PA, isoform A [Drosophila melanogaster]	gi|17864162	30 kDa		100	7	8	33	27.6	0.0154
480	FALSE	Sc2 CG10849-PA [Drosophila melanogaster]	gi|24657023	34 kDa		100	7	8	63	16.2	0.0295
184	FALSE	scully CG7113-PA [Drosophila melanogaster]	gi|17737361	27 kDa		100	7	8	94	37.3	0.044
1207	FALSE	Stretchin-Mlck CG18255-PA, isoform A [Drosophila melanogaster]	gi|24653966	1037 kDa		100	7	7	9	0.831	0.00421
1033	FALSE	stubarista CG14792-PA, isoform A [Drosophila melanogaster]	gi|17136518 (+2)	30 kDa		100	7	8	30	22.4	0.014
1165	FALSE	Tetraspanin 96F CG6120-PA [Drosophila melanogaster]	gi|17738195	30 kDa		100	7	7	11	27.2	0.00515
1148	FALSE	Thiolase CG4581-PA [Drosophila melanogaster]	gi|17137578	51 kDa		100	7	8	55	16.6	0.0257
159	FALSE	Tpi CG2171-PA, isoform A [Drosophila melanogaster]	gi|28572004	38 kDa		100	7	7	22	23.3	0.0103
711	FALSE	Trehalose-6-phosphate synthase 1 CG4104-PA [Drosophila melanogaster]	gi|19920676	91 kDa		100	7	7	24	11.4	0.0112
132	FALSE	UGP CG4347-PA, isoform A [Drosophila melanogaster]	gi|62484278 (+1)	59 kDa		100	7	8	69	17	0.0323
162	FALSE	Vacuolar H[+]-ATPase 55kD B subunit CG17369-PB, isoform B [Drosophila melanogaster]	gi|17136796 (+1)	55 kDa		100	7	7	27	18.4	0.0126
502	FALSE	Vha100-1 CG1709-PE, isoform E [Drosophila melanogaster]	gi|21358171 (+6)	97 kDa		100	7	8	17	10.6	0.00795
987	FALSE	Aldehyde dehydrogenase type III CG11140-PI, isoform I [Drosophila melanogaster]	gi|24586250 (+7)	56 kDa		100	6	6	23	15.3	0.0108
202	FALSE	Arc42 CG4703-PA [Drosophila melanogaster]	gi|21356377	44 kDa		100	6	6	12	15.8	0.00561
718	FALSE	ATP synthase, subunit b CG8189-PB, isoform B [Drosophila melanogaster]	gi|24661888 (+1)	18 kDa		100	6	8	47	31.4	0.022
33	FALSE	Beta Adaptin CG12532-PA [Drosophila melanogaster]	gi|17647183	101 kDa		100	6	6	19	8.14	0.00889
21	FALSE	CaBP1 CG5809-PA [Drosophila melanogaster]	gi|19921434	47 kDa		100	6	6	15	14.5	0.00702
464	FALSE	CG1140 CG1140-PA, isoform A [Drosophila melanogaster]	gi|21358325	55 kDa		100	6	6	10	16.3	0.00468
723	FALSE	CG1371 CG1371-PA [Drosophila melanogaster]	gi|20129847	131 kDa		100	6	6	13	6.51	0.00608
1201	FALSE	CG17374 CG17374-PA [Drosophila melanogaster]	gi|62862516	255 kDa		100	6	6	17	3.24	0.00795
116	FALSE	CG2107 CG2107-PA [Drosophila melanogaster]	gi|24656312	75 kDa		100	6	6	11	11.2	0.00515
365	FALSE	CG2233 CG2233-PA [Drosophila melanogaster]	gi|18921139	47 kDa		100	6	8	24	14	0.0112
129	FALSE	CG3560 CG3560-PA [Drosophila melanogaster]	gi|24642430	14 kDa		100	6	7	35	36.9	0.0164
140	FALSE	CG3699 CG3699-PA [Drosophila melanogaster]	gi|23397609	26 kDa		100	6	6	23	29.9	0.0108
139	FALSE	CG3961 CG3961-PA, isoform A [Drosophila melanogaster]	gi|24666497 (+1)	79 kDa		100	6	6	20	12.6	0.00936
1071	FALSE	CG5840 CG5840-PA, isoform A [Drosophila melanogaster]	gi|21358587	28 kDa		100	6	7	28	26.4	0.0131
73	FALSE	CG6370 CG6370-PA [Drosophila melanogaster]	gi|19922486	69 kDa		100	6	6	19	13.7	0.00889
807	FALSE	CG6439 CG6439-PA [Drosophila melanogaster]	gi|24648872	40 kDa		100	6	6	38	20.3	0.0178
109	FALSE	CG6643 CG6643-PA, isoform A [Drosophila melanogaster]	gi|24649705 (+1)	91 kDa		100	6	6	10	10	0.00468
1068	FALSE	CG6904 CG6904-PA, isoform A [Drosophila melanogaster]	gi|45551893	82 kDa		100	6	6	27	11.3	0.0126
811	FALSE	CG9629 CG9629-PA [Drosophila melanogaster]	gi|24666674	58 kDa		100	6	6	21	14.8	0.00983
918	FALSE	Cytochrome c oxidase subunit Va CG14724-PA, isoform A [Drosophila melanogaster]	gi|17137302 (+1)	17 kDa		100	6	6	17	34.2	0.00795
714	FALSE	Fatty acid (long chain) transport protein CG7400-PA, isoform A [Drosophila melanogaster]	gi|24583463 (+1)	70 kDa		100	6	6	9	11.2	0.00421
768	FALSE	Glycerol 3 phosphate dehydrogenase CG9042-PB, isoform B [Drosophila melanogaster]	gi|17136200 (+2)	39 kDa		100	6	7	16	21.4	0.00749
757	FALSE	Hexosaminidase 2 CG1787-PA [Drosophila melanogaster]	gi|17933586	71 kDa		100	6	7	29	10.5	0.0136
258	FALSE	Histone H4 replacement CG3379-PC, isoform C [Drosophila melanogaster]	gi|17975542 (+20)	11 kDa		100	6	7	72	57.3	0.0337
1123	FALSE	lethal (2) 03709 CG15081-PE, isoform E [Drosophila melanogaster]	gi|161077242	37 kDa		100	6	7	25	19.8	0.0117
343	FALSE	lethal (2) 35Di CG13240-PA, isoform A [Drosophila melanogaster]	gi|19921400	19 kDa		100	6	8	25	39.5	0.0117
249	FALSE	lethal (3) neo18 CG9762-PA [Drosophila melanogaster]	gi|21356475	22 kDa		100	6	6	39	30.1	0.0182
895	FALSE	Mdh CG5889-PA [Drosophila melanogaster]	gi|21356279	69 kDa		100	6	6	9	10.5	0.00421
650	FALSE	NADH:ubiquinone reductase 23kD subunit precursor CG3944-PA [Drosophila melanogaster]	gi|17864306	25 kDa		100	6	6	8	31.3	0.00374
470	FALSE	neuromusculin CG8779-PB, isoform B [Drosophila melanogaster]	gi|116007846 (+1)	116 kDa		100	6	6	10	7.34	0.00468
580	FALSE	Peroxiredoxin 5037 CG5826-PA [Drosophila melanogaster]	gi|17738015	26 kDa		100	6	6	23	25.6	0.0108
471	FALSE	PHGPx CG12013-PB, isoform B [Drosophila melanogaster]	gi|21356883 (+3)	19 kDa		100	6	7	55	27.7	0.0257
431	TRUE	Rab-protein 1 CG3320-PA, isoform A [Drosophila melanogaster]	gi|24648682	23 kDa	FALSE	100	6	7	16	34.6	0.00749
1153	FALSE	Ribosomal protein L13 CG4651-PA, isoform A [Drosophila melanogaster]	gi|17647879 (+1)	25 kDa		100	6	6	21	23.9	0.00983
999	TRUE	Ryanodine receptor 44F CG10844-PA, isoform A [Drosophila melanogaster]	gi|17352465 (+3)	581 kDa	FALSE	100	6	6	11	1.62	0.00515
932	FALSE	string of pearls CG5920-PA [Drosophila melanogaster]	gi|17136734	29 kDa		100	6	6	30	25.1	0.014
731	FALSE	thioredoxin peroxidase 1 CG1633-PA, isoform A [Drosophila melanogaster]	gi|17157991 (+1)	22 kDa		100	6	6	24	30.4	0.0112
145	TRUE	Trap1 CG3152-PA [Drosophila melanogaster]	gi|24586016	78 kDa	FALSE	100	6	6	10	14.2	0.00468
438	FALSE	zipper CG15792-PA, isoform A [Drosophila melanogaster]	gi|24762816 (+3)	237 kDa		100	6	6	10	4.46	0.00468
1168	FALSE	Alcohol dehydrogenase CG3481-PC, isoform C [Drosophila melanogaster]	gi|78706922 (+4)	28 kDa		100	5	8	24	27.7	0.0112
802	FALSE	alpha-Esterase-7 CG1112-PA, isoform A [Drosophila melanogaster]	gi|17737817	65 kDa		100	5	5	17	10.5	0.00795
673	FALSE	beta galactosidase CG9092-PA [Drosophila melanogaster]	gi|24582088	75 kDa		100	5	5	20	7.74	0.00936
660	TRUE	beta-Tubulin at 97EF CG4869-PA [Drosophila melanogaster]	gi|24650776	59 kDa	FALSE	100	5	5	8	14.9	0.00374
468	FALSE	CG11151 CG11151-PA [Drosophila melanogaster]	gi|18859687	12 kDa		100	5	5	20	42.6	0.00936
72	FALSE	CG12079 CG12079-PA [Drosophila melanogaster]	gi|24656494	30 kDa		100	5	7	22	25.3	0.0103
681	FALSE	CG13887 CG13887-PB, isoform B [Drosophila melanogaster]	gi|19923024 (+1)	26 kDa		100	5	5	17	19.3	0.00795
121	TRUE	CG14207 CG14207-PB, isoform B [Drosophila melanogaster]	gi|24643312	22 kDa	FALSE	100	5	6	22	35.9	0.0103
810	FALSE	CG1444 CG1444-PA [Drosophila melanogaster]	gi|24640442	35 kDa		100	5	5	33	21.2	0.0154
288	FALSE	CG16965 CG16965-PA [Drosophila melanogaster]	gi|24583760	78 kDa		100	5	5	21	8.12	0.00983
702	FALSE	CG1907 CG1907-PA [Drosophila melanogaster]	gi|21358457	35 kDa		100	5	6	11	15.5	0.00515
497	FALSE	CG3214 CG3214-PA [Drosophila melanogaster]	gi|24581165	17 kDa		100	5	5	13	28.9	0.00608
86	FALSE	CG3603 CG3603-PA [Drosophila melanogaster]	gi|24639444	26 kDa		100	5	5	23	28.1	0.0108
373	FALSE	CG3835 CG3835-PA, isoform A [Drosophila melanogaster]	gi|18921117 (+2)	58 kDa		100	5	5	14	12.4	0.00655
834	FALSE	CG4598 CG4598-PA [Drosophila melanogaster]	gi|24583165	31 kDa		100	5	6	16	20.3	0.00749
547	FALSE	CG5482 CG5482-PA [Drosophila melanogaster]	gi|19922556	45 kDa		100	5	5	13	16.9	0.00608
1176	TRUE	CG5590 CG5590-PA [Drosophila melanogaster]	gi|21357673	44 kDa	FALSE	100	5	6	55	15	0.0257
884	FALSE	CG5903 CG5903-PA [Drosophila melanogaster]	gi|21357927	24 kDa		100	5	5	16	21.7	0.00749
829	FALSE	CG8036 CG8036-PD, isoform D [Drosophila melanogaster]	gi|24645119 (+2)	63 kDa		100	5	5	18	12.1	0.00842
598	FALSE	CG9331 CG9331-PB, isoform B [Drosophila melanogaster]	gi|24585514 (+4)	36 kDa		100	5	5	11	19.1	0.00515
484	TRUE	CG9512 CG9512-PA [Drosophila melanogaster]	gi|18859993	69 kDa	FALSE	100	5	5	12	9.15	0.00561
887	FALSE	Cuticular protein 64Ad CG1259-PB [Drosophila melanogaster]	gi|21355869	24 kDa		100	5	5	19	27.9	0.00889
503	FALSE	cyclope CG14028-PA [Drosophila melanogaster]	gi|24581914	8 kDa		100	5	5	35	50.6	0.0164
169	FALSE	Cytochrome c proximal CG17903-PA [Drosophila melanogaster]	gi|17137228	12 kDa		100	5	6	23	38	0.0108
865	FALSE	discs large 1 CG1725-PL, isoform L [Drosophila melanogaster]	gi|161077754 (+2)	104 kDa		100	5	5	10	7.19	0.00468
955	FALSE	Enolase CG17654-PA, isoform A [Drosophila melanogaster]	gi|17137654 (+4)	47 kDa		100	5	5	12	17	0.00561
313	TRUE	fau CG6544-PC, isoform C [Drosophila melanogaster]	gi|24645757	14 kDa	FALSE	100	5	6	39	57.3	0.0182
1053	FALSE	ferrochelatase CG2098-PA, isoform A [Drosophila melanogaster]	gi|17864156	44 kDa		100	5	5	14	16.4	0.00655
97	FALSE	Glutathione S transferase S1 CG8938-PA, isoform A [Drosophila melanogaster]	gi|24654347 (+2)	28 kDa		100	5	6	13	19.3	0.00608
1040	FALSE	Hemomucin CG3373-PA [Drosophila melanogaster]	gi|17137194	63 kDa		100	5	5	26	11.2	0.0122
540	TRUE	icarus CG9031-PA [Drosophila melanogaster]	gi|45550188	32 kDa	FALSE	100	5	5	15	15.9	0.00702
101	FALSE	innexin 2 CG4590-PA, isoform A [Drosophila melanogaster]	gi|18858897 (+1)	42 kDa		100	5	6	10	17.4	0.00468
1095	TRUE	Lamin CG6944-PA [Drosophila melanogaster]	gi|17136290	71 kDa	FALSE	100	5	6	15	16.9	0.00702
378	FALSE	like-AP180 CG2520-PA [Drosophila melanogaster]	gi|24644772	50 kDa		100	5	5	11	13.2	0.00515
1177	FALSE	modulo CG2050-PA [Drosophila melanogaster]	gi|24651794	60 kDa		100	5	5	11	14.2	0.00515
252	FALSE	Multiple inositol polyphosphate phosphatase 1 CG4123-PA, isoform A [Drosophila melanogaster]	gi|24665368 (+1)	54 kDa		100	5	6	20	12.8	0.00936
52	FALSE	Neuroglian CG1634-PA, isoform A [Drosophila melanogaster]	gi|17530861 (+2)	138 kDa		100	5	5	11	6.38	0.00515
738	FALSE	Oligosaccharyltransferase 48kD subunit CG9022-PA [Drosophila melanogaster]	gi|24640745	50 kDa		100	5	5	15	13.4	0.00702
32	FALSE	Pdsw CG8844-PA, isoform A [Drosophila melanogaster]	gi|21356165 (+1)	19 kDa		100	5	5	14	37.1	0.00655
1091	FALSE	Rab-protein 2 CG3269-PA [Drosophila melanogaster]	gi|17137088	24 kDa		100	5	5	17	28.6	0.00795
826	FALSE	Rab-protein 5 CG3664-PE, isoform E [Drosophila melanogaster]	gi|17736973 (+5)	24 kDa		100	5	5	15	30.1	0.00702
623	FALSE	Rab-protein 7 CG5915-PA [Drosophila melanogaster]	gi|17865835	23 kDa		100	5	5	9	29	0.00421
575	FALSE	Ribosomal protein L10Ab CG7283-PA, isoform A [Drosophila melanogaster]	gi|24662946	24 kDa		100	5	5	26	23.5	0.0122
684	FALSE	Ribosomal protein L12 CG3195-PA, isoform A [Drosophila melanogaster]	gi|17864452 (+2)	18 kDa		100	5	5	42	32.7	0.0197
1067	FALSE	Ribosomal protein L14 CG6253-PA [Drosophila melanogaster]	gi|17647881	19 kDa		100	5	5	31	27.7	0.0145
375	FALSE	Ribosomal protein L15 CG17420-PD, isoform D [Drosophila melanogaster]	gi|161076128 (+3)	28 kDa		100	5	5	9	22.5	0.00421
227	FALSE	Ribosomal protein L19 CG2746-PA, isoform A [Drosophila melanogaster]	gi|17136322 (+1)	24 kDa		100	5	5	9	24.1	0.00421
384	FALSE	Ribosomal protein L28 CG12740-PA, isoform A [Drosophila melanogaster]	gi|24656625 (+2)	16 kDa		100	5	5	8	25.7	0.00374
1025	FALSE	Ribosomal protein L30 CG10652-PA, isoform A [Drosophila melanogaster]	gi|17864264 (+1)	12 kDa		100	5	5	29	59.5	0.0136
172	FALSE	Ribosomal protein L7A CG3314-PD, isoform D [Drosophila melanogaster]	gi|17530825 (+2)	31 kDa		100	5	5	20	23.2	0.00936
1100	FALSE	Ribosomal protein S13 CG13389-PA, isoform A [Drosophila melanogaster]	gi|17136832 (+1)	17 kDa		100	5	6	16	24.5	0.00749
390	FALSE	Ribosomal protein S14a CG1524-PB, isoform B [Drosophila melanogaster]	gi|17975579 (+2)	16 kDa		100	5	5	46	37.7	0.0215
883	TRUE	Ribosomal protein S15Ab CG12324-PA [Drosophila melanogaster]	gi|24652557	15 kDa	FALSE	100	5	5	19	32.3	0.00889
236	FALSE	Ribosomal protein S7 CG1883-PA, isoform A [Drosophila melanogaster]	gi|21358459 (+2)	22 kDa		100	5	6	25	28.9	0.0117
1023	FALSE	Ribosomal protein S8 CG7808-PC [Drosophila melanogaster]	gi|24651181	24 kDa		100	5	5	38	29.8	0.0178
618	FALSE	RpS25 CG6684-PA, isoform A [Drosophila melanogaster]	gi|24645865 (+1)	13 kDa		100	5	5	22	34.2	0.0103
422	FALSE	Salivary gland secretion 5 CG7596-PA [Drosophila melanogaster]	gi|17738017	19 kDa		100	5	6	42	33.1	0.0197
166	TRUE	short stop CG18076-PH, isoform H [Drosophila melanogaster]	gi|24653497	990 kDa	FALSE	100	5	5	5	0.863	0.00234
432	FALSE	Spase 25-subunit CG1751-PA [Drosophila melanogaster]	gi|24641313	22 kDa		100	5	5	8	22.1	0.00374
122	TRUE	Troponin C at 73F CG7930-PA, isoform A [Drosophila melanogaster]	gi|24665772	18 kDa	FALSE	100	5	5	40	38.1	0.0187
292	TRUE	wings up A CG7178-PB, isoform B [Drosophila melanogaster]	gi|24642959	24 kDa	FALSE	100	5	7	54	35.1	0.0253
926	TRUE	14-3-3zeta CG17870-PD, isoform D [Drosophila melanogaster]	gi|24652322 (+2)	28 kDa	FALSE	100	4	4	19	28.6	0.00889
938	FALSE	abnormal wing discs CG2210-PA [Drosophila melanogaster]	gi|45549037	19 kDa		100	4	5	30	29.1	0.014
78	TRUE	ADP ribosylation factor 79F CG8385-PF, isoform F [Drosophila melanogaster]	gi|161085839 (+5)	21 kDa	FALSE	100	4	4	13	21.4	0.00608
11	FALSE	Annexin B11 CG9968-PA, isoform A [Drosophila melanogaster]	gi|17736989 (+1)	36 kDa		100	4	4	7	9.39	0.00328
142	TRUE	ATP citrate lyase CG8322-PA, isoform A [Drosophila melanogaster]	gi|24653988 (+1)	119 kDa	FALSE	100	4	4	8	5.43	0.00374
685	FALSE	bicoid stability factor CG10302-PA [Drosophila melanogaster]	gi|24584970	157 kDa		100	4	4	7	3.9	0.00328
543	FALSE	Ccp84Ae CG1330-PA [Drosophila melanogaster]	gi|21358141	21 kDa		100	4	4	13	31.2	0.00608
717	FALSE	CG10664 CG10664-PA, isoform A [Drosophila melanogaster]	gi|19921566 (+1)	21 kDa		100	4	4	35	19.8	0.0164
210	FALSE	CG10672 CG10672-PA [Drosophila melanogaster]	gi|21355319	34 kDa		100	4	4	22	14.2	0.0103
1139	FALSE	CG10932 CG10932-PA [Drosophila melanogaster]	gi|24640423	43 kDa		100	4	4	18	13.9	0.00842
961	TRUE	CG11314 CG11314-PA [Drosophila melanogaster]	gi|24651498	17 kDa	FALSE	100	4	4	15	33.3	0.00702
788	FALSE	CG11779 CG11779-PA, isoform A [Drosophila melanogaster]	gi|24648138 (+3)	53 kDa		100	4	4	4	10.5	0.00187
965	FALSE	CG12918 CG12918-PA [Drosophila melanogaster]	gi|20129845	21 kDa		100	4	4	7	23.3	0.00328
922	FALSE	CG13506 CG13506-PA [Drosophila melanogaster]	gi|22026914	57 kDa		100	4	4	4	11.1	0.00187
449	FALSE	CG13865 CG13865-PA, isoform A [Drosophila melanogaster]	gi|116007256	30 kDa		100	4	4	9	18.4	0.00421
820	FALSE	CG14235 CG14235-PA, isoform A [Drosophila melanogaster]	gi|24643375 (+2)	11 kDa		100	4	4	12	50.6	0.00561
1114	FALSE	CG1635 CG1635-PA [Drosophila melanogaster]	gi|28571955	51 kDa		100	4	4	4	12.7	0.00187
698	FALSE	CG1648 CG1648-PA, isoform A [Drosophila melanogaster]	gi|19921938 (+1)	24 kDa		100	4	4	9	18.5	0.00421
137	FALSE	CG17549 CG17549-PB, isoform B [Drosophila melanogaster]	gi|24585186 (+2)	27 kDa		100	4	4	17	28.2	0.00795
720	FALSE	CG17560 CG17560-PA [Drosophila melanogaster]	gi|24647494	56 kDa		100	4	4	24	8.42	0.0112
1189	TRUE	CG17597 CG17597-PA [Drosophila melanogaster]	gi|19921506	44 kDa		100	4	4	12	14.7	0.00561
1034	FALSE	CG1837 CG1837-PA [Drosophila melanogaster]	gi|18859803	47 kDa		100	4	4	16	11.1	0.00749
914	FALSE	CG30000 CG30000-PA [Drosophila melanogaster]	gi|21686985	27 kDa		100	4	4	12	18.4	0.00561
197	FALSE	CG3011 CG3011-PA [Drosophila melanogaster]	gi|24640005	59 kDa		100	4	4	8	8.94	0.00374
499	FALSE	CG31548 CG31548-PA [Drosophila melanogaster]	gi|24644339	27 kDa		100	4	4	28	19.9	0.0131
222	FALSE	CG32230 CG32230-PA, isoform A [Drosophila melanogaster]	gi|24668874 (+1)	9 kDa		100	4	5	45	36.1	0.0211
676	FALSE	CG3566 CG3566-PB, isoform B [Drosophila melanogaster]	gi|45549316	13 kDa		100	4	4	10	41.9	0.00468
981	FALSE	CG3624 CG3624-PA [Drosophila melanogaster]	gi|19922742	20 kDa		100	4	4	19	20.4	0.00889
886	FALSE	CG4302 CG4302-PA [Drosophila melanogaster]	gi|19922680	60 kDa		100	4	4	16	10.3	0.00749
1021	FALSE	CG4572 CG4572-PB, isoform B [Drosophila melanogaster]	gi|21356389 (+2)	54 kDa		100	4	5	11	11	0.00515
772	FALSE	CG4764 CG4764-PA [Drosophila melanogaster]	gi|19920498	20 kDa		100	4	4	18	21.4	0.00842
451	FALSE	CG5080 CG5080-PB, isoform B [Drosophila melanogaster]	gi|19920502 (+1)	61 kDa		100	4	4	14	8.48	0.00655
856	FALSE	CG5174 CG5174-PJ, isoform J [Drosophila melanogaster]	gi|24655017 (+2)	21 kDa		100	4	4	15	12.4	0.00702
617	FALSE	CG5254 CG5254-PA [Drosophila melanogaster]	gi|24638958	34 kDa		100	4	4	13	16.3	0.00608
853	FALSE	CG5793 CG5793-PA [Drosophila melanogaster]	gi|28571789	25 kDa		100	4	4	14	21.1	0.00655
936	FALSE	CG6178 CG6178-PA [Drosophila melanogaster]	gi|21355181	60 kDa		100	4	5	15	11.4	0.00702
777	FALSE	CG6415 CG6415-PA [Drosophila melanogaster]	gi|20129441	43 kDa		100	4	4	10	12.6	0.00468
870	FALSE	CG6767 CG6767-PB, isoform B [Drosophila melanogaster]	gi|45551540	43 kDa		100	4	4	5	11.6	0.00234
677	FALSE	CG8547 CG8547-PA, isoform A [Drosophila melanogaster]	gi|24653598 (+1)	64 kDa		100	4	4	12	12.3	0.00561
839	FALSE	CG8863 CG8863-PA, isoform A [Drosophila melanogaster]	gi|21357547 (+4)	45 kDa		100	4	4	8	13.6	0.00374
1136	FALSE	CG9338 CG9338-PA [Drosophila melanogaster]	gi|24585535	16 kDa		100	4	4	32	34.7	0.015
1144	FALSE	CG9577 CG9577-PA [Drosophila melanogaster]	gi|19920382	34 kDa		100	4	4	15	17.3	0.00702
311	FALSE	CG9603 CG9603-PA [Drosophila melanogaster]	gi|24645039	10 kDa		100	4	4	11	36	0.00515
848	FALSE	Cytochrome b5-related CG13279-PA [Drosophila melanogaster]	gi|17137186	50 kDa		100	4	4	9	13.3	0.00421
264	FALSE	Ecdysone-inducible gene L2 CG15009-PB, isoform B [Drosophila melanogaster]	gi|24657376 (+2)	29 kDa		100	4	4	10	22.5	0.00468
15	FALSE	Ferritin 1 heavy chain homologue CG2216-PA, isoform A [Drosophila melanogaster]	gi|17933722 (+3)	23 kDa		100	4	5	31	24.9	0.0145
441	FALSE	Fkbp13 CG9847-PA, isoform A [Drosophila melanogaster]	gi|17352457 (+1)	24 kDa		100	4	4	12	21.6	0.00561
329	FALSE	flightin CG7445-PA [Drosophila melanogaster]	gi|17737667	21 kDa		100	4	4	10	34.6	0.00468
144	FALSE	G protein oalpha 47A CG2204-PB, isoform B [Drosophila melanogaster]	gi|24652446 (+8)	41 kDa		100	4	4	6	10.5	0.00281
38	FALSE	Glutathione S transferase D1 CG10045-PA, isoform A [Drosophila melanogaster]	gi|17737923 (+1)	24 kDa		100	4	4	8	15.3	0.00374
783	FALSE	His1:CG31617 CG31617-PA [Drosophila melanogaster]	gi|24585669 (+20)	26 kDa		100	4	5	23	15.2	0.0108
797	FALSE	Histone H2A variant CG5499-PA [Drosophila melanogaster]	gi|17738227	15 kDa		100	4	5	36	20.6	0.0168
1219	FALSE	Juvenile hormone epoxide hydrolase 2 CG15102-PA, isoform A [Drosophila melanogaster]	gi|24655327	52 kDa		100	4	4	8	12.7	0.00374
1102	TRUE	Kinesin heavy chain CG7765-PA [Drosophila melanogaster]	gi|17136240	110 kDa		100	4	4	4	6.05	0.00187
791	TRUE	Larval serum protein 1 beta CG4178-PA [Drosophila melanogaster]	gi|17136306	96 kDa	FALSE	100	4	5	13	6.97	0.00608
956	FALSE	lethal (1) G0230 CG2968-PA [Drosophila melanogaster]	gi|18858089	17 kDa		100	4	5	22	19.7	0.0103
94	FALSE	lethal (2) essential for life CG4533-PA, isoform A [Drosophila melanogaster]	gi|17737499	21 kDa		100	4	4	14	19.3	0.00655
910	FALSE	Lipid storage droplet-2 CG9057-PB, isoform B [Drosophila melanogaster]	gi|116007162 (+2)	36 kDa		100	4	4	9	11.3	0.00421
946	FALSE	maggie CG14981-PA, isoform A [Drosophila melanogaster]	gi|17647639	16 kDa		100	4	4	16	25	0.00749
251	FALSE	Mec2 CG7635-PA [Drosophila melanogaster]	gi|18860517	39 kDa		100	4	4	4	15.1	0.00187
940	FALSE	Muscle protein 20 CG4696-PA, isoform A [Drosophila melanogaster]	gi|17136346 (+1)	20 kDa		100	4	4	22	22.3	0.0103
304	FALSE	Phosphoribosylamidotransferase 2 CG10078-PB, isoform B [Drosophila melanogaster]	gi|24659598 (+1)	59 kDa		100	4	4	5	11.2	0.00234
1142	FALSE	Proteasome 35kD subunit CG4904-PA [Drosophila melanogaster]	gi|17737405	31 kDa		100	4	5	12	20.8	0.00561
299	FALSE	Rab-protein 11 CG5771-PB, isoform B [Drosophila melanogaster]	gi|17137216 (+1)	24 kDa		100	4	4	8	19.2	0.00374
581	TRUE	Rac1 CG2248-PA [Drosophila melanogaster]	gi|17136856	21 kDa	FALSE	100	4	4	21	21.9	0.00983
686	FALSE	Rho1 CG8416-PA, isoform A [Drosophila melanogaster]	gi|17137100 (+6)	22 kDa		100	4	4	6	16.7	0.00281
1193	FALSE	Ribosomal protein L22 CG7434-PA [Drosophila melanogaster]	gi|17137152	31 kDa		100	4	4	17	14	0.00795
404	FALSE	Ribosomal protein L7 CG4897-PA [Drosophila melanogaster]	gi|24583248	30 kDa		100	4	4	13	13.5	0.00608
403	FALSE	Ribosomal protein L8 CG1263-PA, isoform A [Drosophila melanogaster]	gi|17864318 (+1)	28 kDa		100	4	5	13	17.2	0.00608
1030	FALSE	Ribosomal protein L9 CG6141-PA, isoform A [Drosophila melanogaster]	gi|17137198 (+1)	21 kDa		100	4	5	28	18.9	0.0131
846	FALSE	Ribosomal protein S17 CG3922-PB [Drosophila melanogaster]	gi|17647889	15 kDa		100	4	4	11	35.9	0.00515
474	FALSE	Ribosomal protein S5a CG8922-PA [Drosophila melanogaster]	gi|17647897	25 kDa		100	4	4	10	17.1	0.00468
20	FALSE	Ribosomal protein S6 CG10944-PB, isoform B [Drosophila melanogaster]	gi|17737290	28 kDa		100	4	5	25	16.9	0.0117
1003	FALSE	Superoxide dismutase 2 (Mn) CG8905-PA [Drosophila melanogaster]	gi|17136812	25 kDa		100	4	4	7	18	0.00328
986	FALSE	Superoxide dismutase CG11793-PA [Drosophila melanogaster]	gi|17136496	16 kDa		100	4	5	16	34	0.00749
762	FALSE	Translationally controlled tumor protein CG4800-PA [Drosophila melanogaster]	gi|24645861	20 kDa		100	4	4	17	26.2	0.00795
907	FALSE	Tudor-SN CG7008-PA [Drosophila melanogaster]	gi|20130403	103 kDa		100	4	4	7	6.48	0.00328
285	FALSE	Vacuolar H[+] ATPase 44kD C subunit CG8048-PA, isoform A [Drosophila melanogaster]	gi|17137392 (+3)	45 kDa		100	4	4	6	7.56	0.00281
231	FALSE	Vha36 CG8186-PA [Drosophila melanogaster]	gi|21355551	28 kDa		100	4	4	10	18.3	0.00468
509	FALSE	walrus CG8996-PB, isoform B [Drosophila melanogaster]	gi|17136898 (+1)	34 kDa		100	4	4	34	14.8	0.0159
177	FALSE	Adenylate kinase-3 CG6612-PA, isoform A [Drosophila melanogaster]	gi|17737899 (+1)	24 kDa		100	3	4	11	16.2	0.00515
799	FALSE	ARP-like CG7013-PA [Drosophila melanogaster]	gi|17137698	20 kDa		100	3	3	6	20.2	0.00281
624	FALSE	Basigin CG31605-PA, isoform A [Drosophila melanogaster]	gi|24582681 (+7)	29 kDa		100	3	3	4	17	0.00187
743	FALSE	capulet CG33979-PA, isoform A [Drosophila melanogaster]	gi|85724872 (+1)	46 kDa		100	3	3	6	4.47	0.00281
1230	FALSE	CG10639 CG10639-PA [Drosophila melanogaster]	gi|24585081	50 kDa		100	3	3	14	9.45	0.00655
369	FALSE	CG11015 CG11015-PA [Drosophila melanogaster]	gi|20129279	14 kDa		100	3	4	18	31.7	0.00842
220	FALSE	CG15261 CG15261-PA [Drosophila melanogaster]	gi|19921376	15 kDa		100	3	3	10	32.6	0.00468
696	FALSE	CG18858 CG18858-PA [Drosophila melanogaster]	gi|24585438 (+1)	48 kDa		100	3	3	5	9.98	0.00234
801	FALSE	CG2076 CG2076-PA [Drosophila melanogaster]	gi|24641180	36 kDa		100	3	3	13	9.38	0.00608
866	FALSE	CG2254 CG2254-PA [Drosophila melanogaster]	gi|24640492	36 kDa		100	3	3	15	12.8	0.00702
885	FALSE	CG30008 CG30008-PA [Drosophila melanogaster]	gi|24652244	31 kDa		100	3	4	19	7.89	0.00889
271	FALSE	CG30415 CG30415-PA, isoform A [Drosophila melanogaster]	gi|24659379 (+1)	10 kDa		100	3	3	20	29.3	0.00936
678	FALSE	CG3153 CG3153-PB, isoform B [Drosophila melanogaster]	gi|21358295 (+1)	17 kDa		100	3	3	5	22	0.00234
1004	FALSE	CG3267 CG3267-PA [Drosophila melanogaster]	gi|24586065	63 kDa		100	3	3	5	7.09	0.00234
824	FALSE	CG33129 CG33129-PE, isoform E [Drosophila melanogaster]	gi|28574516 (+3)	76 kDa		100	3	3	15	5.17	0.00702
1061	FALSE	CG33303 CG33303-PA [Drosophila melanogaster]	gi|45552315	52 kDa		100	3	3	7	7.42	0.00328
869	FALSE	CG3446 CG3446-PA [Drosophila melanogaster]	gi|18858127	18 kDa		100	3	3	11	24	0.00515
211	FALSE	CG3621 CG3621-PA [Drosophila melanogaster]	gi|24639292	12 kDa		100	3	3	11	30.1	0.00515
600	TRUE	CG40084 CG40084-PA, isoform A [Drosophila melanogaster]	gi|161076014 (+1)	147 kDa	FALSE	100	3	3	4	3.17	0.00187
1185	FALSE	CG4020 CG4020-PA [Drosophila melanogaster]	gi|24640000	56 kDa		100	3	3	13	8.91	0.00608
909	FALSE	CG4115 CG4115-PA [Drosophila melanogaster]	gi|24646246	25 kDa		100	3	3	5	18.6	0.00234
493	FALSE	CG4225 CG4225-PA [Drosophila melanogaster]	gi|21357907	98 kDa		100	3	3	13	5.2	0.00608
744	FALSE	CG4666 CG4666-PA [Drosophila melanogaster]	gi|18858163	23 kDa		100	3	3	11	20.7	0.00515
1140	FALSE	CG4692 CG4692-PB, isoform B [Drosophila melanogaster]	gi|19922916 (+1)	12 kDa		100	3	3	47	29.9	0.022
1194	FALSE	CG5009 CG5009-PA [Drosophila melanogaster]	gi|24654595	74 kDa		100	3	3	7	6.28	0.00328
291	FALSE	CG5028 CG5028-PB, isoform B [Drosophila melanogaster]	gi|161078633 (+3)	44 kDa		100	3	3	59	10.7	0.0276
837	FALSE	CG5167 CG5167-PA [Drosophila melanogaster]	gi|24646278	47 kDa		100	3	3	6	9.05	0.00281
1204	FALSE	CG5177 CG5177-PA [Drosophila melanogaster]	gi|20129309	31 kDa		100	3	3	22	13	0.0103
899	FALSE	CG5362 CG5362-PA [Drosophila melanogaster]	gi|24583394	36 kDa		100	3	3	4	15.1	0.00187
1129	FALSE	CG5377 CG5377-PA [Drosophila melanogaster]	gi|24649021	32 kDa		100	3	3	6	11.2	0.00281
542	FALSE	CG5548 CG5548-PA [Drosophila melanogaster]	gi|24642084	14 kDa		100	3	3	31	23.9	0.0145
173	FALSE	CG5550 CG5550-PA [Drosophila melanogaster]	gi|24654259	28 kDa		100	3	3	9	13.4	0.00421
894	FALSE	CG5599 CG5599-PA [Drosophila melanogaster]	gi|18859875	50 kDa		100	3	3	13	8.44	0.00608
237	FALSE	CG5676 CG5676-PA [Drosophila melanogaster]	gi|24583291	17 kDa		100	3	3	5	14.7	0.00234
457	FALSE	CG6028 CG6028-PA, isoform A [Drosophila melanogaster]	gi|28572127	32 kDa		100	3	3	3	12.6	0.0014
778	FALSE	CG6128 CG6128-PB, isoform B [Drosophila melanogaster]	gi|24662717 (+1)	58 kDa		100	3	3	7	6.28	0.00328
345	FALSE	CG6287 CG6287-PA [Drosophila melanogaster]	gi|19921140	35 kDa		100	3	4	4	14.8	0.00187
368	FALSE	CG6463 CG6463-PA [Drosophila melanogaster]	gi|24662306	14 kDa		100	3	3	8	18.5	0.00374
417	FALSE	CG6579 CG6579-PA [Drosophila melanogaster]	gi|24583867	20 kDa		100	3	4	12	22.2	0.00561
49	FALSE	CG6750 CG6750-PA [Drosophila melanogaster]	gi|24583513	28 kDa		100	3	3	6	16.2	0.00281
301	FALSE	CG6783 CG6783-PC, isoform C [Drosophila melanogaster]	gi|78706752 (+1)	17 kDa		100	3	3	10	23.8	0.00468
475	FALSE	CG7263 CG7263-PA, isoform A [Drosophila melanogaster]	gi|24581020 (+1)	74 kDa		100	3	3	7	8.53	0.00328
119	TRUE	CG7359 CG7359-PA [Drosophila melanogaster]	gi|18921099	25 kDa	FALSE	100	3	3	17	20.4	0.00795
692	FALSE	CG7580 CG7580-PA [Drosophila melanogaster]	gi|21355243	10 kDa		100	3	3	6	28.1	0.00281
875	FALSE	CG7603 CG7603-PA [Drosophila melanogaster]	gi|21355241	14 kDa		100	3	3	11	36.9	0.00515
715	FALSE	CG7675 CG7675-PB, isoform B [Drosophila melanogaster]	gi|24647946 (+2)	37 kDa		100	3	3	8	13.9	0.00374
924	FALSE	CG8351 CG8351-PA [Drosophila melanogaster]	gi|24645179	59 kDa		100	3	3	4	8.09	0.00187
524	FALSE	CG8443 CG8443-PA [Drosophila melanogaster]	gi|20130037	161 kDa		100	3	3	6	3.66	0.00281
1178	FALSE	CG8602 CG8602-PA [Drosophila melanogaster]	gi|21356765	53 kDa		100	3	3	6	6.9	0.00281
933	FALSE	CG8728 CG8728-PA [Drosophila melanogaster]	gi|19921772	61 kDa		100	3	3	4	7.37	0.00187
289	FALSE	CG8839 CG8839-PA, isoform A [Drosophila melanogaster]	gi|19922090 (+3)	58 kDa		100	3	3	4	6.43	0.00187
70	FALSE	CG9172 CG9172-PA, isoform A [Drosophila melanogaster]	gi|18859983 (+1)	25 kDa		100	3	3	10	15.4	0.00468
17	TRUE	CG9342 CG9342-PA [Drosophila melanogaster]	gi|24585552	99 kDa		100	3	3	5	4.29	0.00234
667	FALSE	CG9399 CG9399-PA, isoform A [Drosophila melanogaster]	gi|24645421 (+1)	17 kDa		100	3	3	7	20.1	0.00328
773	FALSE	CG9914 CG9914-PA [Drosophila melanogaster]	gi|45549573	35 kDa		100	3	3	3	12.7	0.0014
787	FALSE	CHOp24 CG3564-PA [Drosophila melanogaster]	gi|18921123	23 kDa		100	3	4	8	15.9	0.00374
127	FALSE	Chorion protein 16 CG6533-PA [Drosophila melanogaster]	gi|17647279	14 kDa		100	3	4	14	35.5	0.00655
1020	FALSE	congested-like trachea CG3057-PA, isoform A [Drosophila melanogaster]	gi|17137310 (+3)	33 kDa		100	3	3	7	10.1	0.00328
453	FALSE	coro CG9446-PA, isoform A [Drosophila melanogaster]	gi|24586098 (+2)	57 kDa		100	3	3	3	7.95	0.0014
9	FALSE	Cyt-b5 CG2140-PB, isoform B [Drosophila melanogaster]	gi|24586291 (+1)	15 kDa		100	3	4	63	34.1	0.0295
382	FALSE	Dipeptidase B CG9285-PA, isoform A [Drosophila melanogaster]	gi|21358201 (+2)	56 kDa		100	3	3	9	8.66	0.00421
959	FALSE	Elongation factor Tu mitochondrial CG6050-PA [Drosophila melanogaster]	gi|17864358	54 kDa		100	3	3	5	9	0.00234
1132	FALSE	epithelial membrane protein CG2727-PA, isoform A [Drosophila melanogaster]	gi|24762808 (+2)	59 kDa		100	3	3	5	4.36	0.00234
316	FALSE	Fermitin 1 CG14991-PA, isoform A [Drosophila melanogaster]	gi|24657225 (+1)	80 kDa		100	3	3	4	5.51	0.00187
637	FALSE	Ferritin 2 light chain homologue CG1469-PA, isoform A [Drosophila melanogaster]	gi|24651364 (+2)	25 kDa		100	3	3	7	12.3	0.00328
1016	FALSE	Glutamate oxaloacetate transaminase 1 CG8430-PA, isoform A [Drosophila melanogaster]	gi|19922362 (+1)	46 kDa		100	3	3	7	8.47	0.00328
434	FALSE	Heat shock protein 23 CG4463-PA [Drosophila melanogaster]	gi|17737553	21 kDa		100	3	3	4	21	0.00187
975	FALSE	His2B:CG17949 CG17949-PA [Drosophila melanogaster]	gi|24585671 (+22)	14 kDa		100	3	4	20	23.6	0.00936
26	FALSE	Histone H3.3B CG8989-PA, isoform A [Drosophila melanogaster]	gi|17530867 (+26)	15 kDa		100	3	3	7	14.7	0.00328
607	FALSE	Kruppel homolog 2 CG9159-PA [Drosophila melanogaster]	gi|17737397	31 kDa		100	3	4	7	14.1	0.00328
996	TRUE	Larval serum protein 1 alpha CG2559-PA [Drosophila melanogaster]	gi|24641542	99 kDa	FALSE	100	3	3	5	5.64	0.00234
355	TRUE	lethal (2) 01289 CG9432-PA, isoform A [Drosophila melanogaster]	gi|24586060	97 kDa	FALSE	100	3	3	4	14.4	0.00187
755	FALSE	lethal (2) k09913 CG3082-PC, isoform C [Drosophila melanogaster]	gi|19922796 (+3)	44 kDa		100	3	3	6	9.18	0.00281
893	FALSE	Malic enzyme CG10120-PB, isoform B [Drosophila melanogaster]	gi|24646386 (+1)	85 kDa		100	3	3	7	4.22	0.00328
561	FALSE	Microsomal glutathione S-transferase-like CG1742-PA, isoform A [Drosophila melanogaster]	gi|24643618	17 kDa		100	3	3	34	23	0.0159
187	FALSE	Mitochondrial carrier homolog 1 CG6851-PA, isoform A [Drosophila melanogaster]	gi|17737513 (+2)	35 kDa		100	3	3	6	14.9	0.00281
443	FALSE	mitochondrial ribosomal protein L12 CG5012-PA [Drosophila melanogaster]	gi|17864338	20 kDa		100	3	3	5	19.2	0.00234
784	FALSE	mitochondrial ribosomal protein L18 CG12373-PA [Drosophila melanogaster]	gi|20129927	21 kDa		100	3	3	6	20.4	0.00281
344	FALSE	mitochondrial ribosomal protein S10 CG4247-PC, isoform C [Drosophila melanogaster]	gi|161078308 (+2)	19 kDa		100	3	3	4	17.8	0.00187
276	FALSE	mitochondrial ribosomal protein S34 CG13037-PA [Drosophila melanogaster]	gi|24665233	22 kDa		100	3	3	12	21.3	0.00561
215	FALSE	mitochondrial single stranded DNA-binding protein CG4337-PA, isoform A [Drosophila melanogaster]	gi|24647376 (+1)	16 kDa		100	3	3	9	21.9	0.00421
196	FALSE	mitochondrial transcription factor A CG4217-PA, isoform A [Drosophila melanogaster]	gi|17738065 (+1)	30 kDa		100	3	3	11	10.9	0.00515
22	FALSE	Mitochondrial Transcription Factor B1 CG7319-PC, isoform C [Drosophila melanogaster]	gi|45553069	59 kDa		100	3	3	4	4.83	0.00187
1187	TRUE	Multidrug-Resistance like Protein 1 CG6214-PB, isoform B [Drosophila melanogaster]	gi|24583969 (+16)	173 kDa	FALSE	100	3	3	3	2.84	0.0014
229	FALSE	multiple edematous wings CG1771-PB, isoform B [Drosophila melanogaster]	gi|24641709 (+1)	128 kDa		100	3	3	3	4	0.0014
439	FALSE	Myosin alkali light chain 1 CG5596-PB, isoform B [Drosophila melanogaster]	gi|17136340	18 kDa		100	3	3	40	21.9	0.0187
239	FALSE	Nascent polypeptide associated complex protein alpha subunit CG8759-PB, isoform B [Drosophila melanogaster]	gi|17137300 (+2)	23 kDa		100	3	3	10	21.2	0.00468
1210	TRUE	nervana 1 CG9258-PA [Drosophila melanogaster]	gi|17137210	35 kDa	FALSE	100	3	3	7	9.06	0.00328
455	FALSE	Nucleoplasmin CG7917-PA [Drosophila melanogaster]	gi|17738283	17 kDa		100	3	3	19	23.7	0.00889
641	FALSE	Nucleosome remodeling factor - 38kD CG4634-PA [Drosophila melanogaster]	gi|45549187	38 kDa		100	3	3	4	12.1	0.00187
261	FALSE	Paxillin CG31794-PC, isoform C [Drosophila melanogaster]	gi|24585199 (+4)	62 kDa		100	3	3	5	5.34	0.00234
342	FALSE	Peroxiredoxin 2540 CG11765-PA [Drosophila melanogaster]	gi|17975518 (+2)	25 kDa		100	3	3	10	16.8	0.00468
966	FALSE	polyA-binding protein CG5119-PA, isoform A [Drosophila melanogaster]	gi|17136378 (+7)	70 kDa		100	3	3	4	6.15	0.00187
511	FALSE	Prosbeta5 CG12323-PA, isoform A [Drosophila melanogaster]	gi|21355573 (+1)	31 kDa		100	3	3	9	12.8	0.00421
63	FALSE	Proteasome 28kD subunit 1 CG3422-PA [Drosophila melanogaster]	gi|17933602	28 kDa		100	3	3	6	15.3	0.00281
41	FALSE	Proteasome alpha subunit CG10938-PA, isoform A [Drosophila melanogaster]	gi|24654389 (+1)	27 kDa		100	3	3	6	13.9	0.00281
1213	FALSE	Proteasome alpha6 subunit CG18495-PA, isoform A [Drosophila melanogaster]	gi|24586400 (+2)	27 kDa		100	3	3	10	13.9	0.00468
520	FALSE	Protein ejaculatory bulb CG2668-PA [Drosophila melanogaster]	gi|19922964	38 kDa		100	3	3	12	8.75	0.00561
1172	FALSE	Protein on ecdysone puffs CG6143-PB, isoform B [Drosophila melanogaster]	gi|17864514 (+1)	78 kDa		100	3	3	3	9.09	0.0014
517	FALSE	pugilist CG4067-PA, isoform A [Drosophila melanogaster]	gi|17137370 (+3)	100 kDa		100	3	3	5	4.65	0.00234
437	FALSE	regucalcin CG1803-PC, isoform C [Drosophila melanogaster]	gi|18860103 (+3)	34 kDa		100	3	3	5	11.9	0.00234
1180	FALSE	Ribonuclease X25 CG8194-PA [Drosophila melanogaster]	gi|24660529	38 kDa		100	3	3	6	10.8	0.00281
330	FALSE	Ribosomal protein L13A CG1475-PB [Drosophila melanogaster]	gi|21357053	24 kDa		100	3	3	7	11.7	0.00328
125	TRUE	Ribosomal protein L18A CG6510-PA [Drosophila melanogaster]	gi|17647885	21 kDa	FALSE	100	3	3	10	26	0.00468
594	FALSE	Ribosomal protein L23 CG3661-PA [Drosophila melanogaster]	gi|17647883	15 kDa		100	3	3	10	25.7	0.00468
1022	FALSE	Ribosomal protein L23A CG7977-PA [Drosophila melanogaster]	gi|24655502	29 kDa		100	3	3	44	10.1	0.0206
442	FALSE	Ribosomal protein L24 CG9282-PA [Drosophila melanogaster]	gi|19921254	18 kDa		100	3	3	7	20.6	0.00328
858	FALSE	Ribosomal protein L3 CG4863-PA, isoform A [Drosophila melanogaster]	gi|17737907 (+2)	47 kDa		100	3	3	24	9.38	0.0112
246	FALSE	Ribosomal protein L31 CG1821-PB, isoform B [Drosophila melanogaster]	gi|19921922 (+2)	15 kDa		100	3	3	8	23.4	0.00374
840	FALSE	Ribosomal protein L36 CG7622-PA, isoform A [Drosophila melanogaster]	gi|17136318 (+3)	14 kDa		100	3	3	7	26.1	0.00328
620	FALSE	Ribosomal protein L6 CG11522-PB, isoform B [Drosophila melanogaster]	gi|21357161 (+1)	30 kDa		100	3	4	22	11.5	0.0103
429	FALSE	Ribosomal protein LP1 CG4087-PA [Drosophila melanogaster]	gi|17136320	12 kDa		100	3	4	15	41.1	0.00702
13	FALSE	Ribosomal protein S12 CG11271-PC, isoform C [Drosophila melanogaster]	gi|116008170 (+1)	15 kDa		100	3	3	12	23	0.00561
1229	FALSE	Ribosomal protein S27 CG10423-PA [Drosophila melanogaster]	gi|24649976	9 kDa		100	3	5	11	38.1	0.00515
782	FALSE	Rm62 CG10279-PA, isoform A [Drosophila melanogaster]	gi|24644479	79 kDa		100	3	3	3	7.37	0.0014
906	FALSE	Roe1 CG6155-PA [Drosophila melanogaster]	gi|24653432	24 kDa		100	3	3	8	16	0.00374
888	FALSE	Roughened CG1956-PA [Drosophila melanogaster]	gi|17136706	21 kDa		100	3	3	19	19.6	0.00889
538	FALSE	Rpn2 CG11888-PA [Drosophila melanogaster]	gi|24650984	113 kDa		100	3	3	11	3.73	0.00515
1171	FALSE	Saposin-related CG12070-PA, isoform A [Drosophila melanogaster]	gi|17864128 (+1)	106 kDa		100	3	4	12	3.36	0.00561
818	FALSE	Sec61alpha CG9539-PA [Drosophila melanogaster]	gi|19920826	52 kDa		100	3	3	8	6.51	0.00374
363	FALSE	sluggish A CG1417-PE, isoform E [Drosophila melanogaster]	gi|24643715 (+6)	77 kDa		100	3	3	6	4.93	0.00281
794	FALSE	Sorbitol dehydrogenase 1 CG1982-PA [Drosophila melanogaster]	gi|17137530	39 kDa		100	3	3	10	10.8	0.00468
544	TRUE	Sphingosine-1-phosphate lyase CG8946-PA, isoform A [Drosophila melanogaster]	gi|21355963 (+1)	60 kDa	FALSE	100	3	4	5	7.34	0.00234
74	FALSE	supercoiling factor CG9148-PA, isoform A [Drosophila melanogaster]	gi|17137602 (+1)	38 kDa		100	3	3	8	13.7	0.00374
593	FALSE	Tetraspanin 42Ea CG18817-PA, isoform A [Drosophila melanogaster]	gi|24586138 (+2)	26 kDa		100	3	3	3	14.6	0.0014
460	FALSE	Tissue inhibitor of metalloproteases CG6281-PA, isoform A [Drosophila melanogaster]	gi|24645636 (+1)	24 kDa		100	3	3	6	19	0.00281
943	FALSE	TpnC25D CG6514-PA [Drosophila melanogaster]	gi|24581885	17 kDa		100	3	4	16	19.5	0.00749
75	FALSE	Transferrin 1 CG6186-PA [Drosophila melanogaster]	gi|24643010	72 kDa		100	3	3	8	6.55	0.00374
566	FALSE	Translocase of outer membrane 20 CG7654-PA [Drosophila melanogaster]	gi|28574622	19 kDa		100	3	4	12	30.4	0.00561
1154	FALSE	Translocase of outer membrane 40 CG12157-PA, isoform A [Drosophila melanogaster]	gi|24640397 (+1)	36 kDa		100	3	3	7	10.8	0.00328
458	FALSE	Translocon-associated protein delta CG9035-PA [Drosophila melanogaster]	gi|19922030	18 kDa		100	3	3	18	18.7	0.00842
1225	FALSE	tripeptidyl-peptidase II CG3991-PA, isoform A [Drosophila melanogaster]	gi|17137360 (+1)	149 kDa		100	3	3	3	2.71	0.0014
83	FALSE	Troponin C-akin-1 CG2803-PA, isoform A [Drosophila melanogaster]	gi|24762794	19 kDa		100	3	3	4	18	0.00187
324	FALSE	twinstar CG4254-PA [Drosophila melanogaster]	gi|17136986	17 kDa		100	3	3	18	22.3	0.00842
642	FALSE	Vacuolar H[+]-ATPase SFD subunit CG17332-PA, isoform A [Drosophila melanogaster]	gi|24584671 (+2)	54 kDa		100	3	3	6	8.16	0.00281
349	FALSE	Acid phosphatase 1 CG7899-PA, isoform A [Drosophila melanogaster]	gi|17864600 (+1)	50 kDa		99.8	2	2	2	6.15	0.000936
1011	TRUE	Actin 5C CG4027-PB, isoform B [Drosophila melanogaster]	gi|17530805 (+3)	42 kDa	FALSE	99.8	2	3	13	36.4	0.00608
849	TRUE	Actin 79B CG7478-PA [Drosophila melanogaster]	gi|17975540	42 kDa	FALSE	99.8	2	2	4	38.8	0.00187
224	FALSE	aluminum tubes CG18212-PG, isoform G [Drosophila melanogaster]	gi|21358555 (+5)	99 kDa		100	2	2	4	3.56	0.00187
71	FALSE	Amphiphysin CG8604-PA [Drosophila melanogaster]	gi|17647155	66 kDa		99.8	2	2	3	3.82	0.0014
277	TRUE	Ankyrin CG1651-PC, isoform C [Drosophila melanogaster]	gi|28558750 (+3)	170 kDa	FALSE	99.9	2	2	4	2.13	0.00187
500	FALSE	Ard1 CG11989-PE, isoform E [Drosophila melanogaster]	gi|24662097 (+4)	22 kDa		100	2	2	2	11.7	0.000936
1077	FALSE	B52 CG10851-PA, isoform A [Drosophila melanogaster]	gi|28571689 (+5)	40 kDa		99.8	2	2	3	6	0.0014
785	FALSE	black pearl CG5268-PA [Drosophila melanogaster]	gi|24647293	16 kDa		99.8	2	2	3	19.9	0.0014
522	FALSE	blistery CG9379-PA [Drosophila melanogaster]	gi|21355865	79 kDa		99.8	2	2	4	3.75	0.00187
1046	FALSE	boca CG30498-PA [Drosophila melanogaster]	gi|24586303	21 kDa		100	2	2	3	9.44	0.0014
217	FALSE	bonsai CG4207-PA [Drosophila melanogaster]	gi|19922752	33 kDa		99.8	2	2	3	7.86	0.0014
647	FALSE	BRWD3 CG31132-PA [Drosophila melanogaster]	gi|24649631	249 kDa		99.9	2	2	2	0.806	0.000936
876	FALSE	Calnexin 99A CG11958-PC, isoform C [Drosophila melanogaster]	gi|116008116 (+3)	73 kDa		99.8	2	2	4	5.12	0.00187
662	TRUE	CAP CG18408-PB, isoform B [Drosophila melanogaster]	gi|45551068	197 kDa	FALSE	100	2	2	3	1.44	0.0014
992	FALSE	capping protein alpha CG10540-PA [Drosophila melanogaster]	gi|19922662	33 kDa		99.8	2	2	3	11.5	0.0014
1005	FALSE	Casein kinase II alpha subunit CG17520-PB, isoform B [Drosophila melanogaster]	gi|17864602 (+2)	40 kDa		99.7	2	2	2	8.04	0.000936
1087	FALSE	Ccp84Ag CG2342-PA [Drosophila melanogaster]	gi|21358149	19 kDa		99.8	2	2	5	11.5	0.00234
923	FALSE	CDP diglyceride synthetase CG7962-PA [Drosophila melanogaster]	gi|17864222	52 kDa		99.8	2	3	8	6.94	0.00374
1006	FALSE	Cellular Repressor of E1A-stimulated Genes CG5413-PA, isoform A [Drosophila melanogaster]	gi|24647665 (+1)	24 kDa		99.8	2	2	2	11.8	0.000936
207	FALSE	CG10157 CG10157-PA [Drosophila melanogaster]	gi|21355397	24 kDa		99.8	2	2	4	9.66	0.00187
855	FALSE	CG10373 CG10373-PA [Drosophila melanogaster]	gi|24585024	23 kDa		99.5	2	2	3	10.6	0.0014
1197	FALSE	CG1041 CG1041-PB, isoform B [Drosophila melanogaster]	gi|116007970 (+1)	74 kDa		99.8	2	2	3	4.72	0.0014
1106	FALSE	CG10576 CG10576-PA, isoform A [Drosophila melanogaster]	gi|24658585	43 kDa		100	2	2	6	6.91	0.00281
776	FALSE	CG10724 CG10724-PA, isoform A [Drosophila melanogaster]	gi|21356527 (+1)	67 kDa		99.9	2	2	8	4.47	0.00374
397	FALSE	CG10737 CG10737-PB, isoform B [Drosophila melanogaster]	gi|24655485 (+4)	95 kDa		99.8	2	2	8	3.77	0.00374
763	FALSE	CG11137 CG11137-PA [Drosophila melanogaster]	gi|24668758	18 kDa		99.8	2	2	5	12.7	0.00234
995	FALSE	CG11208 CG11208-PA [Drosophila melanogaster]	gi|19922626	62 kDa		99.9	2	2	2	5.99	0.000936
1093	FALSE	CG11267 CG11267-PA [Drosophila melanogaster]	gi|21356029	11 kDa		100	2	2	7	22.3	0.00328
79	FALSE	CG11665 CG11665-PA [Drosophila melanogaster]	gi|24585866	72 kDa		100	2	2	2	7.45	0.000936
646	FALSE	CG11857 CG11857-PA [Drosophila melanogaster]	gi|21356291	24 kDa		99.8	2	2	11	13.8	0.00515
194	FALSE	CG11967 CG11967-PA [Drosophila melanogaster]	gi|24645213	30 kDa		100	2	2	4	8.24	0.00187
809	FALSE	CG11999 CG11999-PA [Drosophila melanogaster]	gi|24644197	24 kDa		99.8	2	2	6	11.6	0.00281
10	FALSE	CG12455 CG12455-PA, isoform A [Drosophila melanogaster]	gi|24584558	250 kDa		99.9	2	2	2	1.14	0.000936
267	FALSE	CG12505 CG12505-PA [Drosophila melanogaster]	gi|24653618	29 kDa		99.9	2	2	7	11.4	0.00328
353	FALSE	CG12703 CG12703-PA [Drosophila melanogaster]	gi|24643394	75 kDa		99.8	2	2	9	4.66	0.00421
1108	FALSE	CG12859 CG12859-PA [Drosophila melanogaster]	gi|20130001	13 kDa		99.8	2	2	4	20.4	0.00187
152	FALSE	CG13220 CG13220-PA [Drosophila melanogaster]	gi|20129879	16 kDa		99.8	2	2	6	12.4	0.00281
155	FALSE	CG13349 CG13349-PA, isoform A [Drosophila melanogaster]	gi|19922206 (+1)	42 kDa		99.8	2	2	5	9.77	0.00234
117	FALSE	CG13393 CG13393-PA [Drosophila melanogaster]	gi|20129377	13 kDa		99.9	2	2	13	17.9	0.00608
339	FALSE	CG14275 CG14275-PA, isoform A [Drosophila melanogaster]	gi|19920932 (+1)	16 kDa		99.8	2	2	7	16.9	0.00328
482	FALSE	CG14476 CG14476-PB, isoform B [Drosophila melanogaster]	gi|21357605 (+4)	106 kDa		100	2	2	10	4	0.00468
708	FALSE	CG1458 CG1458-PA [Drosophila melanogaster]	gi|21358227	15 kDa		99.8	2	2	48	18.8	0.0225
1092	FALSE	CG14997 CG14997-PA, isoform A [Drosophila melanogaster]	gi|24657386 (+1)	51 kDa		99.8	2	2	6	6.78	0.00281
727	FALSE	CG15043 CG15043-PA [Drosophila melanogaster]	gi|24643050	17 kDa		99.6	2	2	6	12.9	0.00281
701	FALSE	CG15093 CG15093-PB, isoform B [Drosophila melanogaster]	gi|19922568 (+1)	34 kDa		99.8	2	3	5	11.4	0.00234
1096	FALSE	CG15096 CG15096-PB, isoform B [Drosophila melanogaster]	gi|24655271	52 kDa		99.9	2	2	11	6.11	0.00515
539	FALSE	CG15117 CG15117-PA, isoform A [Drosophila melanogaster]	gi|19922582 (+2)	75 kDa		99.8	2	2	2	3.66	0.000936
204	FALSE	CG15203 CG15203-PA [Drosophila melanogaster]	gi|24641174	14 kDa		99.7	2	2	2	18	0.000936
541	FALSE	CG15293 CG15293-PA [Drosophila melanogaster]	gi|19921326	37 kDa		100	2	2	2	9.31	0.000936
997	FALSE	CG1544 CG1544-PA, isoform A [Drosophila melanogaster]	gi|24651589	104 kDa		99.8	2	2	3	2.72	0.0014
1013	FALSE	CG15537 CG15537-PB [Drosophila melanogaster]	gi|161079266	38 kDa		99.8	2	2	12	6.23	0.00561
30	FALSE	CG1637 CG1637-PC, isoform C [Drosophila melanogaster]	gi|20129007	52 kDa		99.9	2	2	9	5.33	0.00421
790	FALSE	CG16904 CG16904-PA [Drosophila melanogaster]	gi|24645538	31 kDa		99.8	2	2	3	6.49	0.0014
1007	FALSE	CG16985 CG16985-PA [Drosophila melanogaster]	gi|21357897	16 kDa		99.9	2	2	5	14.1	0.00234
206	FALSE	CG17242 CG17242-PA [Drosophila melanogaster]	gi|24581083	26 kDa		99.8	2	2	2	9.8	0.000936
360	FALSE	CG17838 CG17838-PC, isoform C [Drosophila melanogaster]	gi|161078446	60 kDa		99.8	2	2	3	4.54	0.0014
781	FALSE	CG1827 CG1827-PB, isoform B [Drosophila melanogaster]	gi|24652135 (+1)	36 kDa		99.8	2	2	2	6.62	0.000936
170	FALSE	CG18815 CG18815-PA, isoform A [Drosophila melanogaster]	gi|21357257 (+2)	23 kDa		99.8	2	2	4	13	0.00187
7	FALSE	CG1910 CG1910-PA, isoform A [Drosophila melanogaster]	gi|21356979 (+3)	52 kDa		99.6	2	2	3	5.69	0.0014
982	FALSE	CG2093 CG2093-PA [Drosophila melanogaster]	gi|161076367	375 kDa		99.9	2	2	2	0.753	0.000936
399	FALSE	CG2118 CG2118-PA, isoform A [Drosophila melanogaster]	gi|24651757 (+1)	77 kDa		99.8	2	2	2	4.26	0.000936
1009	FALSE	CG2604 CG2604-PA, isoform A [Drosophila melanogaster]	gi|21356081 (+2)	47 kDa		100	2	2	5	5.58	0.00234
947	FALSE	CG2736 CG2736-PA [Drosophila melanogaster]	gi|19922958	58 kDa		99.5	2	2	4	5.52	0.00187
1202	FALSE	CG2774 CG2774-PA [Drosophila melanogaster]	gi|24581429	52 kDa		99.9	2	2	2	5.24	0.000936
945	FALSE	CG2862 CG2862-PB, isoform B [Drosophila melanogaster]	gi|24581222 (+1)	14 kDa		99.8	2	2	4	15.3	0.00187
550	FALSE	CG2970 CG2970-PA [Drosophila melanogaster]	gi|45550506	41 kDa		99.7	2	2	4	6.83	0.00187
771	FALSE	CG30059 CG30059-PA [Drosophila melanogaster]	gi|19922168 (+1)	56 kDa		99.6	2	2	4	5.49	0.00187
666	FALSE	CG30296 CG30296-PC, isoform C [Drosophila melanogaster]	gi|161077298 (+2)	55 kDa		99.9	2	2	9	4.75	0.00421
753	FALSE	CG30359 CG30359-PA [Drosophila melanogaster]	gi|24586593	72 kDa		99.7	2	2	2	5.24	0.000936
205	FALSE	CG30423 CG30423-PB [Drosophila melanogaster]	gi|45551164	14 kDa		99.9	2	2	2	8.73	0.000936
726	FALSE	CG3107 CG3107-PC, isoform C [Drosophila melanogaster]	gi|116007548 (+2)	119 kDa		99.8	2	2	4	2.8	0.00187
1116	TRUE	CG31352 CG31352-PA [Drosophila melanogaster]	gi|45550723	90 kDa		100	2	2	3	3.23	0.0014
262	FALSE	CG31523 CG31523-PA, isoform A [Drosophila melanogaster]	gi|21355477 (+3)	41 kDa		99.8	2	2	4	10.5	0.00187
321	FALSE	CG32056 CG32056-PC, isoform C [Drosophila melanogaster]	gi|24662167 (+1)	37 kDa		99.9	2	2	8	10.3	0.00374
585	FALSE	CG32355 CG32355-PA [Drosophila melanogaster]	gi|45550575	81 kDa		99.8	2	2	2	3.74	0.000936
200	FALSE	CG32638 CG32638-PA [Drosophila melanogaster]	gi|24641679	15 kDa		99.8	2	2	15	21.2	0.00702
269	FALSE	CG32857 CG32857-PA [Drosophila melanogaster]	gi|24643765 (+2)	31 kDa		99.8	2	2	3	8.48	0.0014
486	FALSE	CG3321 CG3321-PA, isoform A [Drosophila melanogaster]	gi|21358593 (+1)	9 kDa		99.8	2	4	12	24.7	0.00561
931	FALSE	CG33977 CG33977-PA [Drosophila melanogaster]	gi|85725222	11 kDa		99.8	2	2	11	23.4	0.00515
287	FALSE	CG34329 CG34329-PA [Drosophila melanogaster]	gi|161077951	13 kDa		99.8	2	2	2	19	0.000936
98	FALSE	CG3501 CG3501-PA [Drosophila melanogaster]	gi|19922774	23 kDa		99.8	2	2	6	12.3	0.00281
81	FALSE	CG3663 CG3663-PA [Drosophila melanogaster]	gi|19922924	23 kDa		99.8	2	2	3	11.5	0.0014
976	FALSE	CG3683 CG3683-PA, isoform A [Drosophila melanogaster]	gi|24762701 (+2)	20 kDa		99.8	2	2	4	18.9	0.00187
789	FALSE	CG3887 CG3887-PA [Drosophila melanogaster]	gi|19920720	22 kDa		99.8	2	2	4	10.6	0.00187
1182	FALSE	CG41128 CG41128-PA [Drosophila melanogaster]	gi|161076204	9 kDa		99.8	2	2	4	21.2	0.00187
228	TRUE	CG4589 CG4589-PB, isoform B [Drosophila melanogaster]	gi|19922902 (+2)	114 kDa		100	2	2	3	2.67	0.0014
831	TRUE	CG4685 CG4685-PA, isoform A [Drosophila melanogaster]	gi|21356737 (+3)	55 kDa		100	2	2	3	5.5	0.0014
879	FALSE	CG4882 CG4882-PA [Drosophila melanogaster]	gi|17137576	46 kDa		99.5	2	2	2	7.39	0.000936
1045	FALSE	CG5023 CG5023-PA [Drosophila melanogaster]	gi|21356183	19 kDa		100	2	2	8	10.7	0.00374
752	FALSE	CG5044 CG5044-PA, isoform A [Drosophila melanogaster]	gi|28571729 (+1)	43 kDa		99.6	2	2	2	5.96	0.000936
533	FALSE	CG5077 CG5077-PA, isoform A [Drosophila melanogaster]	gi|62484308 (+2)	92 kDa		99.9	2	2	4	2.75	0.00187
796	FALSE	CG5112 CG5112-PA [Drosophila melanogaster]	gi|21356731	58 kDa		99.8	2	2	3	6.31	0.0014
323	FALSE	CG5355 CG5355-PA [Drosophila melanogaster]	gi|24583414	86 kDa		99.8	2	2	4	4.37	0.00187
1088	FALSE	CG5554 CG5554-PA [Drosophila melanogaster]	gi|20130317	36 kDa		100	2	2	7	6.81	0.00328
951	FALSE	CG5597 CG5597-PA [Drosophila melanogaster]	gi|20130319	30 kDa		100	2	2	4	13.1	0.00187
828	FALSE	CG5625 CG5625-PA, isoform A [Drosophila melanogaster]	gi|45550489 (+1)	70 kDa		99.9	2	2	4	3.65	0.00187
80	FALSE	CG5844 CG5844-PA [Drosophila melanogaster]	gi|21357171	42 kDa		99.9	2	2	4	8.2	0.00187
44	FALSE	CG5885 CG5885-PA [Drosophila melanogaster]	gi|19921016	22 kDa		99.8	2	2	5	10	0.00234
436	FALSE	CG5931 CG5931-PA [Drosophila melanogaster]	gi|28574898	245 kDa		99.8	2	3	5	1.12	0.00234
161	FALSE	CG5946 CG5946-PD, isoform D [Drosophila melanogaster]	gi|116007804 (+3)	36 kDa		99.8	2	2	3	9.9	0.0014
572	FALSE	CG5958 CG5958-PA [Drosophila melanogaster]	gi|24582499	34 kDa		99.8	2	2	8	8.5	0.00374
603	FALSE	CG6020 CG6020-PA [Drosophila melanogaster]	gi|24667554	47 kDa		99.8	2	2	2	6.97	0.000936
221	FALSE	CG6084 CG6084-PA, isoform A [Drosophila melanogaster]	gi|24662781 (+1)	36 kDa		100	2	2	3	6.86	0.0014
1074	FALSE	CG6094 CG6094-PA [Drosophila melanogaster]	gi|19921098	23 kDa		99.8	2	2	6	13.3	0.00281
621	FALSE	CG6329 CG6329-PC, isoform C [Drosophila melanogaster]	gi|19922194 (+3)	17 kDa		99.8	2	3	6	18.1	0.00281
633	FALSE	CG6453 CG6453-PA [Drosophila melanogaster]	gi|19921464	62 kDa		99.9	2	2	9	4.74	0.00421
1122	FALSE	CG6459 CG6459-PA [Drosophila melanogaster]	gi|20130085	29 kDa		99.8	2	2	11	7.22	0.00515
39	TRUE	CG6512 CG6512-PB, isoform B [Drosophila melanogaster]	gi|24665814 (+1)	76 kDa		99.8	2	2	3	4.36	0.0014
416	FALSE	CG6638 CG6638-PA [Drosophila melanogaster]	gi|21355753	46 kDa		99.8	2	2	3	5.71	0.0014
283	FALSE	CG6666 CG6666-PA [Drosophila melanogaster]	gi|45550736	19 kDa		99.8	2	2	6	9.36	0.00281
830	FALSE	CG6812 CG6812-PA [Drosophila melanogaster]	gi|24666596	36 kDa		99.8	2	2	3	7.03	0.0014
1131	FALSE	CG6950 CG6950-PB, isoform B [Drosophila melanogaster]	gi|24646114 (+3)	51 kDa		99.8	2	2	2	8	0.000936
578	FALSE	CG6984 CG6984-PA [Drosophila melanogaster]	gi|19922422	31 kDa		99.7	2	2	2	5.61	0.000936
579	FALSE	CG7277 CG7277-PA [Drosophila melanogaster]	gi|19920760	52 kDa		99.8	2	2	3	5.45	0.0014
798	FALSE	CG7639 CG7639-PA, isoform A [Drosophila melanogaster]	gi|24653772 (+1)	51 kDa		100	2	2	5	5.64	0.00234
61	TRUE	CG7712 CG7712-PA [Drosophila melanogaster]	gi|19922002	15 kDa	FALSE	100	2	2	11	21.8	0.00515
652	FALSE	CG7816 CG7816-PA, isoform A [Drosophila melanogaster]	gi|24651187 (+5)	39 kDa		99.9	2	2	8	11.8	0.00374
351	FALSE	CG7830 CG7830-PA [Drosophila melanogaster]	gi|24582773	37 kDa		100	2	2	6	5.76	0.00281
712	FALSE	CG7891 CG7891-PA [Drosophila melanogaster]	gi|21355085	21 kDa		99.8	2	2	5	12.4	0.00234
154	FALSE	CG7970 CG7970-PA [Drosophila melanogaster]	gi|21358267	22 kDa		99.8	2	2	5	9.42	0.00234
583	FALSE	CG7997 CG7997-PA, isoform A [Drosophila melanogaster]	gi|19922382 (+1)	47 kDa		99.9	2	2	8	5.52	0.00374
2	FALSE	CG8029 CG8029-PB, isoform B [Drosophila melanogaster]	gi|20129819 (+1)	41 kDa		99.8	2	2	7	6.6	0.00328
1024	FALSE	CG8042 CG8042-PA, isoform A [Drosophila melanogaster]	gi|21356345	71 kDa		100	2	2	4	4.88	0.00187
1120	FALSE	CG8790 CG8790-PA, isoform A [Drosophila melanogaster]	gi|21357545 (+1)	31 kDa		100	2	2	4	5.71	0.00187
742	TRUE	CG8798 CG8798-PA, isoform A [Drosophila melanogaster]	gi|24666867 (+1)	113 kDa		100	2	2	6	4.21	0.00281
610	FALSE	CG8993 CG8993-PA [Drosophila melanogaster]	gi|21358065	16 kDa		99.8	2	3	12	16.9	0.00561
915	FALSE	CG9231 CG9231-PA [Drosophila melanogaster]	gi|21357525	14 kDa		100	2	2	4	25.6	0.00187
240	FALSE	CG9306 CG9306-PA [Drosophila melanogaster]	gi|19921244	17 kDa		100	2	2	17	15.3	0.00795
180	FALSE	CG9336 CG9336-PA [Drosophila melanogaster]	gi|24585531	16 kDa		99.8	2	2	6	16.2	0.00281
949	FALSE	CG9458 CG9458-PA [Drosophila melanogaster]	gi|24645542	31 kDa		99.8	2	2	5	7.2	0.00234
639	FALSE	CG9796 CG9796-PA [Drosophila melanogaster]	gi|28573018	28 kDa		99.8	2	2	7	10.8	0.00328
501	FALSE	CG9938 CG9938-PA [Drosophila melanogaster]	gi|18860017	78 kDa		99.8	2	2	2	4	0.000936
805	FALSE	Chitinase-like CG5210-PA [Drosophila melanogaster]	gi|17137072	50 kDa		99.8	2	2	3	6.19	0.0014
1111	FALSE	Chorion protein 15 CG6519-PA [Drosophila melanogaster]	gi|17647277	12 kDa		99.8	2	2	2	25.2	0.000936
508	FALSE	Chorion protein 19 CG6524-PA [Drosophila melanogaster]	gi|17986137	19 kDa		99.8	2	3	14	20.2	0.00655
309	FALSE	Chorion protein 38 CG11213-PA [Drosophila melanogaster]	gi|17530859	30 kDa		99.8	2	2	20	13.7	0.00936
284	FALSE	Clathrin light chain CG6948-PA [Drosophila melanogaster]	gi|24667294	24 kDa		99.8	2	2	7	13.7	0.00328
248	FALSE	cut up CG6998-PA, isoform A [Drosophila melanogaster]	gi|17933574 (+3)	10 kDa		99.9	2	3	8	32.6	0.00374
28	FALSE	Cyp6a23 CG10242-PA [Drosophila melanogaster]	gi|24653737	58 kDa		99.8	2	2	2	4.58	0.000936
1036	FALSE	cytochrome c oxidase subunit II [Drosophila melanogaster]	gi|5835236	26 kDa		99.9	2	2	20	7.46	0.00936
364	FALSE	Cytochrome P450-6a2 CG9438-PA [Drosophila melanogaster]	gi|17647305	59 kDa		99.8	2	2	2	4.94	0.000936
679	FALSE	desat1 CG5887-PA, isoform A [Drosophila melanogaster]	gi|24646297 (+4)	43 kDa		100	2	2	4	5.48	0.00187
800	FALSE	Dihydropteridine reductase CG4665-PA, isoform A [Drosophila melanogaster]	gi|17647337 (+2)	25 kDa		99.8	2	2	2	9.79	0.000936
114	FALSE	Dipeptidyl aminopeptidase III CG7415-PC, isoform C [Drosophila melanogaster]	gi|24645047 (+1)	89 kDa		99.8	2	2	4	3.18	0.00187
108	FALSE	Diphenol oxidase A2 CG10484-PA [Drosophila melanogaster]	gi|17137450	56 kDa		99.6	2	2	2	4.45	0.000936
23	FALSE	Dodeca-satellite-binding protein 1 CG5170-PC, isoform C [Drosophila melanogaster]	gi|24655003 (+5)	144 kDa		100	2	2	2	2.61	0.000936
273	FALSE	dorsal CG6667-PC, isoform C [Drosophila melanogaster]	gi|24584826	112 kDa		99.9	2	2	2	2.8	0.000936
1035	FALSE	Ecdysone-induced gene 71Ed CG7350-PA [Drosophila melanogaster]	gi|17737595	11 kDa		99.8	2	2	8	21.2	0.00374
347	FALSE	eIF-2alpha CG9946-PA [Drosophila melanogaster]	gi|18860087	39 kDa		99.8	2	2	2	7.33	0.000936
843	FALSE	eIF-5A CG3186-PA, isoform A [Drosophila melanogaster]	gi|19922878 (+1)	18 kDa		99.8	2	2	22	13.8	0.0103
609	FALSE	Eukaryotic initiation factor 4E CG4035-PB, isoform B [Drosophila melanogaster]	gi|17864468 (+6)	29 kDa		99.8	2	3	21	19.3	0.00983
60	TRUE	Fad2 CG7923-PA [Drosophila melanogaster]	gi|24662393	41 kDa		99.9	2	2	4	7.04	0.00187
146	FALSE	G protein alpha49B CG17759-PH, isoform H [Drosophila melanogaster]	gi|17647455 (+5)	42 kDa		99.9	2	2	3	6.8	0.0014
724	FALSE	Glutathione S transferase E3 CG17524-PA [Drosophila melanogaster]	gi|24654975	25 kDa		99.8	2	2	4	9.55	0.00187
408	FALSE	Glutathione S transferase E6 CG17530-PA [Drosophila melanogaster]	gi|19922532	25 kDa		99.7	2	2	3	10.4	0.0014
43	TRUE	Heat shock protein cognate 2 CG7756-PA [Drosophila melanogaster]	gi|17737941	70 kDa	FALSE	99.8	2	3	28	6.79	0.0131
1215	FALSE	hoi-polloi CG3949-PA [Drosophila melanogaster]	gi|17864298	14 kDa		99.8	2	2	12	18.9	0.00561
1066	FALSE	Hsc70Cb CG6603-PA, isoform A [Drosophila melanogaster]	gi|21357475 (+2)	89 kDa		99.9	2	2	3	3.86	0.0014
1039	FALSE	I'm not dead yet CG3979-PA, isoform A [Drosophila melanogaster]	gi|17737623 (+2)	64 kDa		99.9	2	2	9	4.41	0.00421
450	FALSE	Imaginal disc growth factor 2 CG4475-PA [Drosophila melanogaster]	gi|19549546	49 kDa		100	2	2	5	8.18	0.00234
168	FALSE	Integrin linked kinase CG10504-PA [Drosophila melanogaster]	gi|24667933	51 kDa		99.9	2	2	3	4.02	0.0014
317	FALSE	Iron regulatory protein 1B CG6342-PA [Drosophila melanogaster]	gi|24645686	99 kDa		99.5	2	2	2	2.56	0.000936
1141	FALSE	Juvenile hormone epoxide hydrolase 1 CG15101-PA [Drosophila melanogaster]	gi|20130139	55 kDa		99.8	2	2	2	5.06	0.000936
1027	FALSE	kin of irre CG3653-PA, isoform A [Drosophila melanogaster]	gi|24639450 (+1)	101 kDa		99.8	2	2	2	3.03	0.000936
245	FALSE	l(2)k14708 CG9006-PA [Drosophila melanogaster]	gi|24652780	71 kDa		99.8	2	2	3	3.6	0.0014
266	FALSE	lark CG8597-PA, isoform A [Drosophila melanogaster]	gi|17647581 (+4)	40 kDa		99.8	2	2	2	5.68	0.000936
1195	FALSE	lethal (2) 06225 CG6105-PB, isoform B [Drosophila melanogaster]	gi|116007314 (+2)	11 kDa		99.8	2	2	22	23.2	0.0103
619	FALSE	lethal (3) 03670 CG1715-PA [Drosophila melanogaster]	gi|21358165	24 kDa		100	2	2	5	13.5	0.00234
1186	FALSE	Lipid storage droplet-1 CG10374-PC, isoform C [Drosophila melanogaster]	gi|45550802 (+1)	46 kDa		100	2	2	3	6.03	0.0014
25	FALSE	Microtubule-associated protein 205 CG1483-PA, isoform A [Drosophila melanogaster]	gi|17864160 (+1)	124 kDa		100	2	2	2	2.87	0.000936
627	TRUE	mitochondrial acyl carrier protein 1 CG9160-PA, isoform A [Drosophila melanogaster]	gi|17136934	17 kDa		99.9	2	2	4	12.5	0.00187
134	TRUE	mitochondrial carnitine palmitoyltransferase I CG12891-PA, isoform A [Drosophila melanogaster]	gi|24652463 (+1)	89 kDa	FALSE	99.8	2	2	3	2.95	0.0014
730	FALSE	mitochondrial ribosomal protein L10 CG11488-PA [Drosophila melanogaster]	gi|17647667	28 kDa		99.6	2	2	5	8.47	0.00234
836	FALSE	mitochondrial ribosomal protein L30 CG7038-PA [Drosophila melanogaster]	gi|17933570	21 kDa		99.8	2	2	3	16.7	0.0014
91	FALSE	mitochondrial ribosomal protein L41 CG12954-PA [Drosophila melanogaster]	gi|21687222	19 kDa		99.8	2	3	5	16.3	0.00234
584	FALSE	mitochondrial ribosomal protein L43 CG5479-PA [Drosophila melanogaster]	gi|17647665	22 kDa		99.8	2	2	4	20.8	0.00187
948	TRUE	mitochondrial ribosomal protein L44 CG2109-PA [Drosophila melanogaster]	gi|21357105	36 kDa		99.9	2	2	2	7.79	0.000936
1200	FALSE	mitochondrial ribosomal protein S18A CG31450-PA [Drosophila melanogaster]	gi|24645087	18 kDa		99.6	2	2	2	13.5	0.000936
398	FALSE	mitochondrial ribosomal protein S18C CG9688-PA [Drosophila melanogaster]	gi|24651373	16 kDa		99.7	2	2	2	13.6	0.000936
980	FALSE	mitochondrial ribosomal protein S25 CG14413-PA [Drosophila melanogaster]	gi|17986025	19 kDa		99.8	2	2	3	13.2	0.0014
1010	FALSE	Muscle LIM protein at 60A CG33149-PA [Drosophila melanogaster]	gi|28573630	10 kDa		99.8	2	3	5	22.8	0.00234
314	TRUE	Myosin heavy chain CG17927-PB, isoform B [Drosophila melanogaster]	gi|24584710	224 kDa	FALSE	99.8	2	2	9	53.4	0.00421
133	TRUE	Myosin heavy chain CG17927-PF, isoform F [Drosophila melanogaster]	gi|24584700	225 kDa	FALSE	99.8	2	2	20	54.8	0.00936
892	TRUE	Myosin heavy chain CG17927-PJ, isoform J [Drosophila melanogaster]	gi|24584698	224 kDa	FALSE	99.8	2	2	3	54.1	0.0014
1196	FALSE	Myosin light chain cytoplasmic CG3201-PA [Drosophila melanogaster]	gi|17530801	17 kDa		99.8	2	2	5	16.3	0.00234
705	FALSE	nervana 2 CG9261-PC, isoform C [Drosophila melanogaster]	gi|17137212 (+4)	37 kDa		100	2	2	6	8.7	0.00281
635	FALSE	Neuropeptide-like precursor 2 CG11051-PA [Drosophila melanogaster]	gi|21358539	9 kDa		99.8	2	2	7	26.7	0.00328
424	FALSE	Niemann-Pick Type C-2 CG7291-PA [Drosophila melanogaster]	gi|20129163	16 kDa		100	2	2	6	12.8	0.00281
1166	FALSE	Nipsnap CG9212-PB, isoform B [Drosophila melanogaster]	gi|18860049 (+2)	32 kDa		99.8	2	3	9	7.33	0.00421
67	TRUE	Nop56 CG13849-PA [Drosophila melanogaster]	gi|28572126	55 kDa		99.9	2	2	2	5.65	0.000936
756	FALSE	NP15.6 CG6008-PA [Drosophila melanogaster]	gi|21356773	17 kDa		99.9	2	2	7	19.3	0.00328
766	TRUE	optic atrophy 1-like CG8479-PB, isoform B [Drosophila melanogaster]	gi|19922232 (+1)	107 kDa	FALSE	100	2	2	3	2.88	0.0014
844	FALSE	overgrown hematopoietic organs at 23B CG2986-PC, isoform C [Drosophila melanogaster]	gi|17647757 (+3)	9 kDa		99.8	2	2	8	22.9	0.00374
816	TRUE	Paramyosin CG5939-PC, isoform C [Drosophila melanogaster]	gi|24661120 (+1)	74 kDa	FALSE	99.8	2	3	11	37.5	0.00515
732	FALSE	Phosphofructokinase CG4001-PA, isoform A [Drosophila melanogaster]	gi|17647809 (+2)	105 kDa		99.8	2	2	10	3.68	0.00468
331	FALSE	Phosphoglycerate kinase CG3127-PA [Drosophila melanogaster]	gi|17136394	44 kDa		99.8	2	2	3	5.54	0.0014
1086	FALSE	Pros25 CG5266-PA [Drosophila melanogaster]	gi|17737927	26 kDa		99.8	2	2	3	8.97	0.0014
654	FALSE	Prosap CG30483-PA [Drosophila melanogaster]	gi|24653538	196 kDa		99.8	2	2	2	1.03	0.000936
176	FALSE	Proteasome 26kD subunit CG4097-PA [Drosophila melanogaster]	gi|17737605	26 kDa		99.9	2	2	3	11.1	0.0014
1121	FALSE	Proteasome 29kD subunit CG9327-PA [Drosophila melanogaster]	gi|17136420	29 kDa		100	2	2	5	8.71	0.00234
1070	FALSE	Proteasome alpha7 subunit CG1519-PA, isoform A [Drosophila melanogaster]	gi|24652204	28 kDa		100	2	2	4	11.9	0.00187
104	FALSE	Protein phosphatase 1 at 13C CG9156-PA [Drosophila melanogaster]	gi|17933732 (+1)	35 kDa		99.8	2	2	4	6.62	0.00187
1055	FALSE	pumpless CG7758-PA [Drosophila melanogaster]	gi|17865652	18 kDa		99.8	2	2	15	18.2	0.00702
47	FALSE	Qm CG17521-PA, isoform A [Drosophila melanogaster]	gi|116008436 (+1)	27 kDa		100	2	2	6	6.49	0.00281
857	TRUE	Rab-protein 4 CG4921-PB, isoform B [Drosophila melanogaster]	gi|17647849 (+2)	24 kDa	FALSE	99.7	2	2	2	16	0.000936
478	FALSE	Ras oncogene at 64B CG1167-PA [Drosophila melanogaster]	gi|24657269	22 kDa		99.9	2	2	2	13	0.000936
1221	FALSE	Ras oncogene at 85D CG9375-PA [Drosophila melanogaster]	gi|17136430	22 kDa		99.8	2	2	3	12.7	0.0014
812	FALSE	Rbp1-like CG1987-PA [Drosophila melanogaster]	gi|24641772	17 kDa		100	2	2	5	13.3	0.00234
235	FALSE	refractory to sigma P CG10360-PA, isoform A [Drosophila melanogaster]	gi|17136432 (+1)	65 kDa		99.8	2	2	16	6.34	0.00749
574	FALSE	REG CG1591-PA [Drosophila melanogaster]	gi|18860055	28 kDa		99.6	2	2	2	10.2	0.000936
921	FALSE	Ribosomal protein L11 CG7726-PA [Drosophila melanogaster]	gi|17137026	21 kDa		100	2	2	7	12.5	0.00328
1082	FALSE	Ribosomal protein L18 CG8615-PA [Drosophila melanogaster]	gi|21357009	22 kDa		100	2	2	11	18.1	0.00515
653	FALSE	Ribosomal protein L32 CG7939-PA, isoform A [Drosophila melanogaster]	gi|17864106 (+2)	16 kDa		99.9	2	2	5	17.9	0.00234
567	FALSE	Ribosomal protein L38 CG18001-PA [Drosophila melanogaster]	gi|116007488	8 kDa		99.8	2	2	7	28.6	0.00328
1105	FALSE	Ribosomal protein S15 CG8332-PA, isoform A [Drosophila melanogaster]	gi|19922390 (+1)	17 kDa		99.8	2	2	6	8.84	0.00281
1001	FALSE	Ribosomal protein S23 CG8415-PA [Drosophila melanogaster]	gi|22024141	16 kDa		99.8	2	2	7	12.6	0.00328
230	FALSE	Ribosomal protein S29 CG8495-PA, isoform A [Drosophila melanogaster]	gi|24645515 (+1)	7 kDa		99.8	2	3	5	28.6	0.00234
565	FALSE	Rieske iron-sulfur protein CG7361-PB, isoform B [Drosophila melanogaster]	gi|24580896	25 kDa		99.9	2	3	18	10.9	0.00842
87	FALSE	RpL34b CG9354-PA, isoform A [Drosophila melanogaster]	gi|24645339 (+3)	18 kDa		99.9	2	2	4	9.26	0.00187
770	FALSE	Rpn1 CG7762-PA [Drosophila melanogaster]	gi|21356859	102 kDa		99.7	2	2	2	3.26	0.000936
359	FALSE	Rpn12 CG4157-PA [Drosophila melanogaster]	gi|21357229	30 kDa		99.8	2	2	4	10.2	0.00187
814	FALSE	Sac1 CG9128-PA [Drosophila melanogaster]	gi|19923034	68 kDa		99.6	2	2	2	4.56	0.000936
234	FALSE	sar1 CG7073-PB, isoform B [Drosophila melanogaster]	gi|21355813 (+4)	17 kDa		99.8	2	3	4	10.4	0.00187
37	FALSE	Sec61beta CG10130-PA [Drosophila melanogaster]	gi|21356199	10 kDa		99.9	2	2	6	24	0.00281
1135	FALSE	Serine protease inhibitor 4 CG9453-PC, isoform C [Drosophila melanogaster]	gi|24586104 (+10)	47 kDa		99.8	2	2	6	4.62	0.00281
1192	FALSE	Serine protease inhibitor 43Ab CG1865-PA, isoform A [Drosophila melanogaster]	gi|24586176 (+1)	43 kDa		99.8	2	2	3	6.11	0.0014
396	FALSE	SF2 CG6987-PA [Drosophila melanogaster]	gi|21358097	28 kDa		100	2	2	2	9.8	0.000936
576	FALSE	sick CG34343-PD, isoform D [Drosophila melanogaster]	gi|161076970	215 kDa		100	2	2	2	1.24	0.000936
307	FALSE	Signal sequence receptor beta CG5474-PA [Drosophila melanogaster]	gi|24665049	21 kDa		99.8	2	2	11	10	0.00515
487	FALSE	smt3 CG4494-PA [Drosophila melanogaster]	gi|17137634	10 kDa		99.8	2	2	4	23.3	0.00187
1188	FALSE	Snx6 CG8282-PA [Drosophila melanogaster]	gi|19920922	50 kDa		99.9	2	2	3	4.9	0.0014
1090	FALSE	Soluble NSF attachment protein CG6625-PA [Drosophila melanogaster]	gi|17737681	33 kDa		99.7	2	2	2	8.56	0.000936
889	FALSE	Spase 22/23-subunit CG5677-PA [Drosophila melanogaster]	gi|21355207	20 kDa		99.7	2	2	5	10.6	0.00234
150	FALSE	Spinophilin CG16757-PA [Drosophila melanogaster]	gi|24656102	233 kDa		99.9	2	2	5	0.886	0.00234
92	FALSE	squid CG16901-PC, isoform C [Drosophila melanogaster]	gi|24646605 (+2)	33 kDa		99.9	2	2	2	8.43	0.000936
319	FALSE	Suppressor of variegation 3-9 CG6476-PC, isoform C [Drosophila melanogaster]	gi|24647048 (+1)	50 kDa		99.8	2	2	3	4.28	0.0014
838	FALSE	Synaptobrevin CG12210-PA, isoform A [Drosophila melanogaster]	gi|17647971 (+1)	14 kDa		99.8	2	3	19	20.2	0.00889
488	FALSE	Tetraspanin 42Ed CG12846-PA [Drosophila melanogaster]	gi|17648065	25 kDa		99.8	2	2	5	8.81	0.00234
656	FALSE	Tetraspanin 42Ee CG10106-PA [Drosophila melanogaster]	gi|17648067	25 kDa		99.8	2	2	17	9.65	0.00795
278	FALSE	Tetraspanin 42Ef CG12845-PA [Drosophila melanogaster]	gi|22026781	25 kDa		99.8	2	2	13	8.64	0.00608
1128	FALSE	Tetraspanin 42El CG12840-PA [Drosophila melanogaster]	gi|17737437	24 kDa		99.8	2	2	6	10.6	0.00281
779	FALSE	Thioredoxin reductase-1 CG2151-PA, isoform A [Drosophila melanogaster]	gi|24640549 (+2)	53 kDa		99.8	2	3	6	6.5	0.00281
185	FALSE	thioredoxin-2 CG31884-PA, isoform A [Drosophila melanogaster]	gi|17648013 (+1)	12 kDa		99.8	2	2	4	19.8	0.00187
1145	TRUE	Translocation protein 1 CG4758-PA, isoform A [Drosophila melanogaster]	gi|17136944 (+1)	47 kDa		99.5	2	2	4	6.78	0.00187
40	FALSE	Trip1 CG8882-PA [Drosophila melanogaster]	gi|17648041	36 kDa		99.8	2	2	6	7.98	0.00281
740	FALSE	tropomodulin CG1539-PG, isoform G [Drosophila melanogaster]	gi|161079282 (+6)	59 kDa		99.9	2	2	2	8.44	0.000936
560	TRUE	Troponin C at 47D CG9073-PA [Drosophila melanogaster]	gi|17136890	18 kDa	FALSE	99.8	2	2	33	24.5	0.0154
769	TRUE	Uev1A CG10640-PA, isoform A [Drosophila melanogaster]	gi|21355265	17 kDa		99.9	2	2	5	17.9	0.00234
427	FALSE	uninitiated CG4008-PA [Drosophila melanogaster]	gi|17137568	50 kDa		99.8	2	2	7	8.48	0.00328
466	TRUE	upheld CG7107-PA, isoform A [Drosophila melanogaster]	gi|24641813	47 kDa	FALSE	99.8	2	2	17	40.8	0.00795
1078	FALSE	Vap-33-1 CG5014-PB, isoform B [Drosophila melanogaster]	gi|18543325 (+3)	29 kDa		99.9	2	2	15	9.79	0.00702
1160	FALSE	VhaAC39 CG2934-PA [Drosophila melanogaster]	gi|18543319	40 kDa		99.8	2	2	3	8.29	0.0014
265	FALSE	vibrator CG5269-PA [Drosophila melanogaster]	gi|17738047	31 kDa		99.8	2	2	3	9.56	0.0014
491	FALSE	virus-induced RNA 1 CG31764-PA, isoform A [Drosophila melanogaster]	gi|24583894 (+2)	49 kDa		99.6	2	2	2	7.89	0.000936
1080	TRUE	wings up A CG7178-PD, isoform D [Drosophila melanogaster]	gi|24642955 (+1)	24 kDa	FALSE	100	2	2	7	27.9	0.00328
370	TRUE	wings up A CG7178-PG, isoform G [Drosophila melanogaster]	gi|24642963	30 kDa	FALSE	100	2	3	4	27.5	0.00187
1047	TRUE	14-3-3zeta CG17870-PC, isoform C [Drosophila melanogaster]	gi|45551063 (+1)	28 kDa	FALSE	50	1	1	5	25	0.00234
1076	TRUE	825-Oak CG32208-PA [Drosophila melanogaster]	gi|24666745 (+1)	16 kDa		99	1	1	2	8.44	0.000936
189	TRUE	Actin 57B CG10067-PA, isoform A [Drosophila melanogaster]	gi|17647135	42 kDa	FALSE	50	1	2	54	42.3	0.0253
310	TRUE	acyl-Coenzyme A oxidase at 57D proximal CG9707-PA [Drosophila melanogaster]	gi|17647123	76 kDa		50	1	1	1	2.22	0.000468
357	TRUE	Adenosine deaminase-related growth factor A CG5992-PA, isoform A [Drosophila melanogaster]	gi|17737615 (+1)	63 kDa		99.3	1	1	2	2.71	0.000936
873	TRUE	Adenylate kinase-1 CG17146-PA, isoform A [Drosophila melanogaster]	gi|17647141 (+1)	22 kDa		50	1	1	1	5.68	0.000468
201	TRUE	Adenylate kinase-2 CG3140-PA [Drosophila melanogaster]	gi|22026816	27 kDa		99.8	1	1	6	5.83	0.00281
808	TRUE	ADP ribosylation factor 102F CG11027-PA [Drosophila melanogaster]	gi|17864182	21 kDa	FALSE	50	1	1	3	11.7	0.0014
871	TRUE	amontillado CG6438-PA [Drosophila melanogaster]	gi|17136192	72 kDa		97.6	1	1	1	2.14	0.000468
835	TRUE	Arflike at 72A CG6025-PA [Drosophila melanogaster]	gi|24664933	20 kDa		50	1	1	2	6.11	0.000936
483	TRUE	Arginine methyltransferase 1 CG6554-PA [Drosophila melanogaster]	gi|21356361	43 kDa		50	1	1	2	5.85	0.000936
597	TRUE	Arp11 CG12235-PA [Drosophila melanogaster]	gi|19920358	42 kDa		50	1	1	2	3.44	0.000936
260	TRUE	Aspartyl beta-hydroxylase CG8421-PB, isoform B [Drosophila melanogaster]	gi|17647175 (+3)	43 kDa		50	1	1	1	1.66	0.000468
537	TRUE	Aspartyl-tRNA synthetase CG3821-PA [Drosophila melanogaster]	gi|17136276	59 kDa		50	1	1	2	3.39	0.000936
896	TRUE	atlastin CG6668-PA, isoform A [Drosophila melanogaster]	gi|21355515 (+1)	61 kDa		98.9	1	1	1	2.03	0.000468
640	TRUE	ATPase coupling factor 6 CG4412-PA [Drosophila melanogaster]	gi|17137260	12 kDa		50	1	1	2	11.3	0.000936
688	TRUE	Autophagy-specific gene 8b CG12334-PA [Drosophila melanogaster]	gi|21358545 (+1)	14 kDa		50	1	1	3	5.79	0.0014
123	TRUE	baiser CG11785-PA [Drosophila melanogaster]	gi|28571872 (+1)	24 kDa		50	1	1	2	5.34	0.000936
937	TRUE	bendless CG18319-PA [Drosophila melanogaster]	gi|17530929	17 kDa		50	1	1	1	12.6	0.000468
95	TRUE	bicaudal CG3644-PA, isoform A [Drosophila melanogaster]	gi|17136698 (+1)	18 kDa		50	1	1	1	7.1	0.000468
328	TRUE	Bmcp CG7314-PB, isoform B [Drosophila melanogaster]	gi|21357261 (+1)	33 kDa		50	1	1	2	4.62	0.000936
1208	TRUE	cactus CG5848-PB, isoform B [Drosophila melanogaster]	gi|17136840 (+3)	54 kDa		50	1	1	3	2.4	0.0014
1107	TRUE	Calcium/calmodulin-dependent protein kinase II CG18069-PB, isoform B [Drosophila melanogaster]	gi|24638772 (+3)	58 kDa		97.6	1	1	1	2.36	0.000468
128	TRUE	Calmodulin CG8472-PA, isoform A [Drosophila melanogaster]	gi|17647231 (+1)	17 kDa		50	1	1	1	7.38	0.000468
216	TRUE	Calpain-A CG7563-PC, isoform C [Drosophila melanogaster]	gi|161077258 (+1)	94 kDa		99.2	1	1	2	2.54	0.000936
1181	TRUE	Cctgamma CG8977-PA, isoform A [Drosophila melanogaster]	gi|24647510 (+1)	59 kDa		50	1	1	2	2.39	0.000936
100	TRUE	Cdc42 CG12530-PA, isoform A [Drosophila melanogaster]	gi|17647249 (+1)	21 kDa		98.8	1	1	3	5.24	0.0014
103	TRUE	CG10166 CG10166-PA [Drosophila melanogaster]	gi|24585265	27 kDa		50	1	1	4	5.81	0.00187
1019	TRUE	CG10217 CG10217-PA, isoform A [Drosophila melanogaster]	gi|45550800 (+1)	71 kDa		50	1	1	1	2.26	0.000468
754	TRUE	CG10306 CG10306-PA [Drosophila melanogaster]	gi|19922704	26 kDa		50	1	1	1	6.76	0.000468
1205	TRUE	CG10320 CG10320-PB, isoform B [Drosophila melanogaster]	gi|161077342 (+2)	12 kDa		97.8	1	1	15	10	0.00702
358	TRUE	CG10340 CG10340-PA [Drosophila melanogaster]	gi|45550758	32 kDa		50	1	1	1	4.32	0.000468
1094	TRUE	CG10361 CG10361-PA [Drosophila melanogaster]	gi|24662918	46 kDa		50	1	1	1	4.32	0.000468
19	TRUE	CG10413 CG10413-PA [Drosophila melanogaster]	gi|19921484	104 kDa		99.7	1	1	2	1.59	0.000936
872	TRUE	CG10467 CG10467-PA [Drosophila melanogaster]	gi|24659048	40 kDa		50	1	1	1	5.49	0.000468
244	TRUE	CG10616 CG10616-PA [Drosophila melanogaster]	gi|24663300	55 kDa		99	1	1	1	3.05	0.000468
842	TRUE	CG10863 CG10863-PA [Drosophila melanogaster]	gi|21356425	36 kDa		50	1	1	1	4.43	0.000468
465	TRUE	CG10960 CG10960-PB, isoform B [Drosophila melanogaster]	gi|24663511 (+2)	58 kDa		50	1	1	1	2.97	0.000468
786	TRUE	CG10992 CG10992-PA [Drosophila melanogaster]	gi|18921171	37 kDa		97.6	1	1	1	5	0.000468
257	TRUE	CG1105 CG1105-PA [Drosophila melanogaster]	gi|24644712	46 kDa		50	1	1	3	3.08	0.0014
934	TRUE	CG11089 CG11089-PA [Drosophila melanogaster]	gi|24649832	63 kDa		98.8	1	1	1	1.36	0.000468
214	TRUE	CG11236 CG11236-PA [Drosophila melanogaster]	gi|19920852	38 kDa	FALSE	50	1	1	2	4.11	0.000936
978	TRUE	CG11315 CG11315-PA, isoform A [Drosophila melanogaster]	gi|21358239	18 kDa	FALSE	50	1	1	2	15.3	0.000936
1081	TRUE	CG11739 CG11739-PC, isoform C [Drosophila melanogaster]	gi|28571493 (+3)	36 kDa		99.1	1	2	6	4.36	0.00281
341	TRUE	CG11771 CG11771-PA [Drosophila melanogaster]	gi|21356111	81 kDa		50	1	1	1	1.64	0.000468
350	TRUE	CG11781 CG11781-PA [Drosophila melanogaster]	gi|24649877	13 kDa		50	1	1	2	8.85	0.000936
935	TRUE	CG11858 CG11858-PA [Drosophila melanogaster]	gi|21356303	14 kDa		50	1	1	2	9.23	0.000936
657	TRUE	CG11915 CG11915-PA [Drosophila melanogaster]	gi|21355931	80 kDa		97.7	1	1	1	1.73	0.000468
1054	TRUE	CG11920 CG11920-PA [Drosophila melanogaster]	gi|24649922	35 kDa		50	1	1	10	2.68	0.00468
827	TRUE	CG1213 CG1213-PA, isoform A [Drosophila melanogaster]	gi|24644446 (+2)	53 kDa		50	1	1	4	2.04	0.00187
587	TRUE	CG12162 CG12162-PA, isoform A [Drosophila melanogaster]	gi|21356905 (+1)	46 kDa		50	1	1	2	3.71	0.000936
372	TRUE	CG12163 CG12163-PB, isoform B [Drosophila melanogaster]	gi|24644153 (+1)	54 kDa		99.5	1	1	1	2.28	0.000468
601	TRUE	CG12203 CG12203-PA [Drosophila melanogaster]	gi|18860539	21 kDa		50	1	1	2	6.56	0.000936
1161	TRUE	CG12264 CG12264-PA [Drosophila melanogaster]	gi|20129463	51 kDa		50	1	1	3	3.03	0.0014
638	TRUE	CG12321 CG12321-PA [Drosophila melanogaster]	gi|24647855	28 kDa		50	1	1	1	5.26	0.000468
232	TRUE	CG1275 CG1275-PB, isoform B [Drosophila melanogaster]	gi|21358209 (+3)	36 kDa		50	1	1	2	7	0.000936
693	TRUE	CG12818 CG12818-PA [Drosophila melanogaster]	gi|24645661	33 kDa		97.6	1	1	1	3.47	0.000468
562	TRUE	CG12935 CG12935-PA [Drosophila melanogaster]	gi|20129861	27 kDa		50	1	1	3	5.63	0.0014
513	TRUE	CG13047 CG13047-PA [Drosophila melanogaster]	gi|24665154	18 kDa		50	1	1	4	7.82	0.00187
745	TRUE	CG1307 CG1307-PB [Drosophila melanogaster]	gi|24644665	20 kDa		50	1	1	4	8.06	0.00187
160	TRUE	CG1309 CG1309-PA [Drosophila melanogaster]	gi|21355871	58 kDa		50	1	2	6	3.24	0.00281
925	TRUE	CG13163 CG13163-PA [Drosophila melanogaster]	gi|85726431	26 kDa		50	1	1	1	7.33	0.000468
53	TRUE	CG1319 CG1319-PA [Drosophila melanogaster]	gi|24657492	17 kDa		50	1	1	3	5.7	0.0014
69	TRUE	CG13210 CG13210-PA [Drosophila melanogaster]	gi|24652684	15 kDa		50	1	1	1	9.49	0.000468
462	TRUE	CG13255 CG13255-PA [Drosophila melanogaster]	gi|24667756	7 kDa		50	1	1	3	26.9	0.0014
760	TRUE	CG13284 CG13284-PB, isoform B [Drosophila melanogaster]	gi|28574402	38 kDa		99.3	1	1	1	3.83	0.000468
110	TRUE	CG13392 CG13392-PA [Drosophila melanogaster]	gi|24582811	25 kDa		97.9	1	1	1	5.38	0.000468
1028	TRUE	CG13397 CG13397-PA [Drosophila melanogaster]	gi|21356587	90 kDa		99.4	1	1	1	1.29	0.000468
410	TRUE	CG13850 CG13850-PA [Drosophila melanogaster]	gi|24648987	55 kDa		50	1	1	1	3.56	0.000468
971	TRUE	CG13890 CG13890-PA [Drosophila melanogaster]	gi|24654903	29 kDa		50	1	1	1	5.34	0.000468
175	TRUE	CG13920 CG13920-PA [Drosophila melanogaster]	gi|21358265	18 kDa		50	1	1	8	10.6	0.00374
767	TRUE	CG14207 CG14207-PA, isoform A [Drosophila melanogaster]	gi|19920346	21 kDa	FALSE	50	1	1	9	33.3	0.00421
902	TRUE	CG14401 CG14401-PA [Drosophila melanogaster]	gi|45550359	15 kDa		50	1	1	2	7.53	0.000936
833	TRUE	CG14613 CG14613-PA [Drosophila melanogaster]	gi|19920420	27 kDa		50	1	2	9	8.71	0.00421
939	TRUE	CG14715 CG14715-PA [Drosophila melanogaster]	gi|21356629	15 kDa		97.9	1	1	3	10.9	0.0014
571	TRUE	CG14787 CG14787-PA [Drosophila melanogaster]	gi|23397616	29 kDa		50	1	1	2	8.08	0.000936
472	TRUE	CG14804 CG14804-PA [Drosophila melanogaster]	gi|24639192	53 kDa		50	1	1	2	3.77	0.000936
1175	TRUE	CG14977 CG14977-PA [Drosophila melanogaster]	gi|28574298	13 kDa		50	1	1	4	10.8	0.00187
706	TRUE	CG15012 CG15012-PB [Drosophila melanogaster]	gi|24657484	17 kDa		50	1	1	2	9.87	0.000936
88	TRUE	CG15168 CG15168-PA [Drosophila melanogaster]	gi|19921518	12 kDa		50	1	1	1	7.34	0.000468
1099	TRUE	CG15211 CG15211-PB, isoform B [Drosophila melanogaster]	gi|161077725 (+3)	19 kDa		50	1	1	3	5.08	0.0014
780	TRUE	CG15386 CG15386-PA [Drosophila melanogaster]	gi|24581044	9 kDa		50	1	1	5	16.9	0.00234
917	TRUE	CG15531 CG15531-PB, isoform B [Drosophila melanogaster]	gi|161079187 (+1)	39 kDa		50	1	1	2	3.24	0.000936
1150	TRUE	CG15881 CG15881-PB, isoform B [Drosophila melanogaster]	gi|21357363 (+1)	14 kDa		50	1	1	8	10.3	0.00374
983	TRUE	CG1599 CG1599-PA [Drosophila melanogaster]	gi|19921940	25 kDa		98	1	1	2	5.5	0.000936
1026	TRUE	CG1665 CG1665-PA [Drosophila melanogaster]	gi|45550400	38 kDa		50	1	1	1	2.94	0.000468
376	TRUE	CG1674 CG1674-PB, isoform B [Drosophila melanogaster]	gi|24638571 (+1)	82 kDa		98.1	1	1	1	2.42	0.000468
559	TRUE	CG16771 CG16771-PA [Drosophila melanogaster]	gi|24585213	65 kDa		50	1	1	1	2.52	0.000468
1103	TRUE	CG16799 CG16799-PA [Drosophila melanogaster]	gi|45550471	21 kDa		96.1	1	1	1	5.59	0.000468
901	TRUE	CG16905 CG16905-PA [Drosophila melanogaster]	gi|24645536	30 kDa		50	1	1	2	3.5	0.000936
130	TRUE	CG16936 CG16936-PA [Drosophila melanogaster]	gi|19922932	25 kDa		99	1	1	3	8.52	0.0014
346	TRUE	CG17218 CG17218-PA, isoform A [Drosophila melanogaster]	gi|20129467 (+1)	17 kDa		50	1	1	4	9.93	0.00187
1183	TRUE	CG17259 CG17259-PA [Drosophila melanogaster]	gi|24581334	56 kDa		50	1	1	1	1.6	0.000468
182	TRUE	CG17280 CG17280-PA [Drosophila melanogaster]	gi|20130301	12 kDa		99	1	1	2	7.34	0.000936
1220	TRUE	CG17322 CG17322-PD, isoform D [Drosophila melanogaster]	gi|19921504 (+3)	58 kDa		99.4	1	1	1	2.51	0.000468
845	TRUE	CG17331 CG17331-PA [Drosophila melanogaster]	gi|20129563	22 kDa		99	1	1	4	5.97	0.00187
864	TRUE	CG17691 CG17691-PA, isoform A [Drosophila melanogaster]	gi|160714828 (+1)	44 kDa		50	1	1	4	4.67	0.00187
916	TRUE	CG17734 CG17734-PA, isoform A [Drosophila melanogaster]	gi|21356421 (+1)	11 kDa		50	1	1	8	14.7	0.00374
758	TRUE	CG17765 CG17765-PA [Drosophila melanogaster]	gi|19921976	22 kDa		50	1	1	1	7.04	0.000468
877	TRUE	CG18003 CG18003-PB, isoform B [Drosophila melanogaster]	gi|78707188 (+1)	40 kDa		50	1	1	2	4.25	0.000936
1126	TRUE	CG1814 CG1814-PB, isoform B [Drosophila melanogaster]	gi|24652117 (+2)	48 kDa		50	1	1	2	3.25	0.000936
1209	TRUE	CG18249 CG18249-PA [Drosophila melanogaster]	gi|24644981	62 kDa		98	1	1	1	2.34	0.000468
247	TRUE	CG18591 CG18591-PA [Drosophila melanogaster]	gi|24582631	11 kDa		50	1	1	2	16	0.000936
897	TRUE	CG1893 CG1893-PA [Drosophila melanogaster]	gi|21357863	30 kDa		99.1	1	1	1	4.18	0.000468
1190	TRUE	CG2023 CG2023-PA [Drosophila melanogaster]	gi|24644438	26 kDa		50	1	1	1	6.17	0.000468
485	TRUE	CG2046 CG2046-PA [Drosophila melanogaster]	gi|21357311	26 kDa		50	1	1	2	5.53	0.000936
529	TRUE	CG2064 CG2064-PA [Drosophila melanogaster]	gi|22024069	37 kDa		50	1	1	1	3.64	0.000468
51	TRUE	CG2241 CG2241-PA [Drosophila melanogaster]	gi|24651451	45 kDa		98.3	1	1	4	3.51	0.00187
65	TRUE	CG2791 CG2791-PA [Drosophila melanogaster]	gi|24644940	63 kDa		50	1	1	2	2.65	0.000936
1032	TRUE	CG2807 CG2807-PA [Drosophila melanogaster]	gi|45550087	150 kDa		97.8	1	1	1	0.597	0.000468
803	TRUE	CG2813 CG2813-PA [Drosophila melanogaster]	gi|19920474	17 kDa		50	1	1	3	9.15	0.0014
516	TRUE	CG30015 CG30015-PC, isoform C [Drosophila melanogaster]	gi|161076518	163 kDa		98.9	1	1	1	1.06	0.000468
361	TRUE	CG30084 CG30084-PG, isoform G [Drosophila melanogaster]	gi|116007706 (+1)	96 kDa	FALSE	50	1	1	1	18.2	0.000468
120	TRUE	CG30109 CG30109-PA [Drosophila melanogaster]	gi|24654512	10 kDa		98.2	1	1	1	14.8	0.000468
903	TRUE	CG30122 CG30122-PB [Drosophila melanogaster]	gi|22024201	140 kDa		99.7	1	1	1	1.65	0.000468
494	TRUE	CG30344 CG30344-PA [Drosophila melanogaster]	gi|24652011	56 kDa		50	1	1	2	2.76	0.000936
50	TRUE	CG3036 CG3036-PA [Drosophila melanogaster]	gi|20129235	54 kDa		99.4	1	1	1	2.43	0.000468
1199	TRUE	CG30373 CG30373-PA [Drosophila melanogaster]	gi|24586529	18 kDa		99.4	1	1	2	7.59	0.000936
12	TRUE	CG30493 CG30493-PB [Drosophila melanogaster]	gi|24586344	36 kDa		98.5	1	1	1	3.68	0.000468
552	TRUE	CG31063 CG31063-PA [Drosophila melanogaster]	gi|24650557	44 kDa		50	1	1	1	3.71	0.000468
867	TRUE	CG31126 CG31126-PA [Drosophila melanogaster]	gi|24649743	13 kDa		98	1	1	1	13	0.000468
333	TRUE	CG31195 CG31195-PA [Drosophila melanogaster]	gi|24648516	96 kDa		98.6	1	1	1	1.22	0.000468
469	TRUE	CG31233 CG31233-PA [Drosophila melanogaster]	gi|28571792	107 kDa		50	1	1	1	0.84	0.000468
1104	TRUE	CG31407 CG31407-PA [Drosophila melanogaster]	gi|24645576	17 kDa		97.7	1	1	1	7.05	0.000468
1018	TRUE	CG31460 CG31460-PA [Drosophila melanogaster]	gi|24645089	15 kDa		50	1	1	2	10.6	0.000936
1056	TRUE	CG3156 CG3156-PA [Drosophila melanogaster]	gi|23397593	76 kDa		50	1	1	1	1.59	0.000468
448	TRUE	CG3164 CG3164-PA, isoform A [Drosophila melanogaster]	gi|24580553 (+3)	78 kDa		98.5	1	1	3	2	0.0014
106	TRUE	CG3192 CG3192-PA, isoform A [Drosophila melanogaster]	gi|24640175 (+1)	20 kDa		99.7	1	1	10	5.71	0.00468
124	TRUE	CG32022 CG32022-PA [Drosophila melanogaster]	gi|24661095	20 kDa		50	1	1	1	5.62	0.000468
238	TRUE	CG32030 CG32030-PA, isoform A [Drosophila melanogaster]	gi|24661140 (+1)	156 kDa		50	1	1	1	0.541	0.000468
281	TRUE	CG32069 CG32069-PA [Drosophila melanogaster]	gi|24662435	9 kDa		50	1	1	2	16.2	0.000936
290	TRUE	CG32103 CG32103-PB, isoform B [Drosophila melanogaster]	gi|24663275 (+2)	65 kDa		50	1	1	2	2.23	0.000936
411	TRUE	CG32267 CG32267-PA [Drosophila melanogaster]	gi|24656869	6 kDa		50	1	1	1	26.5	0.000468
55	TRUE	CG32528 CG32528-PA [Drosophila melanogaster]	gi|24643390	42 kDa		99.5	1	1	2	4.09	0.000936
515	TRUE	CG32549 CG32549-PD, isoform D [Drosophila melanogaster]	gi|24643014 (+4)	66 kDa		99.2	1	1	1	2.12	0.000468
905	TRUE	CG3287 CG3287-PB, isoform B [Drosophila melanogaster]	gi|24586086 (+1)	52 kDa		97.6	1	1	3	3.56	0.0014
891	TRUE	CG3305 CG3305-PA [Drosophila melanogaster]	gi|56292537	35 kDa		50	1	1	1	3.46	0.000468
1085	TRUE	CG33138 CG33138-PA [Drosophila melanogaster]	gi|28573410	79 kDa		97.8	1	1	1	2.34	0.000468
57	TRUE	CG33171 CG33171-PC, isoform C [Drosophila melanogaster]	gi|28574366 (+1)	81 kDa		50	1	1	7	2.02	0.00328
881	TRUE	CG33205 CG33205-PB, isoform B [Drosophila melanogaster]	gi|45552080 (+7)	56 kDa		99.7	1	1	1	12.6	0.000468
531	TRUE	CG33275 CG33275-PA, isoform A [Drosophila melanogaster]	gi|161082060 (+1)	211 kDa		99.7	1	1	1	1.05	0.000468
900	TRUE	CG34026 CG34026-PA [Drosophila melanogaster]	gi|85724812	13 kDa		98.6	1	1	4	12	0.00187
850	TRUE	CG3403 CG3403-PA [Drosophila melanogaster]	gi|19921700	26 kDa		99.4	1	1	1	8.97	0.000468
589	TRUE	CG34228 CG34228-PA [Drosophila melanogaster]	gi|161076551	10 kDa		50	1	1	4	17	0.00187
463	TRUE	CG34415 CG34415-PC, isoform C [Drosophila melanogaster]	gi|161077186 (+1)	196 kDa		50	1	1	4	1.35	0.00187
192	TRUE	CG34417 CG34417-PD, isoform D [Drosophila melanogaster]	gi|161077598	380 kDa		100	1	1	1	0.591	0.000468
518	TRUE	CG34439 CG34439-PA, isoform A [Drosophila melanogaster]	gi|161077029	9 kDa		98.5	1	1	10	15.1	0.00468
203	TRUE	CG34445 CG34445-PA [Drosophila melanogaster]	gi|161077401	15 kDa		50	1	1	3	7.46	0.0014
1072	TRUE	CG34455 CG34455-PC [Drosophila melanogaster]	gi|45553007	33 kDa		50	1	1	3	5.26	0.0014
352	TRUE	CG3609 CG3609-PA [Drosophila melanogaster]	gi|24581117	37 kDa		97.7	1	1	1	3.58	0.000468
1216	TRUE	CG3610 CG3610-PA [Drosophila melanogaster]	gi|24646928	56 kDa		50	1	1	1	1.43	0.000468
851	TRUE	CG3678 CG3678-PA [Drosophila melanogaster]	gi|24647557 (+1)	33 kDa		50	1	1	1	5.67	0.000468
1109	TRUE	CG3792 CG3792-PA [Drosophila melanogaster]	gi|24581793	28 kDa		50	1	1	1	3.97	0.000468
308	TRUE	CG3800 CG3800-PA [Drosophila melanogaster]	gi|24658883	18 kDa		50	1	1	2	15.2	0.000936
354	TRUE	CG3906 CG3906-PA [Drosophila melanogaster]	gi|19922820	28 kDa		50	1	1	1	5	0.000468
433	TRUE	CG3911 CG3911-PA [Drosophila melanogaster]	gi|45550579	20 kDa		50	1	1	1	5.62	0.000468
165	TRUE	CG3940 CG3940-PA [Drosophila melanogaster]	gi|24645604	34 kDa		50	1	1	1	3.62	0.000468
340	TRUE	CG3999 CG3999-PA [Drosophila melanogaster]	gi|24645648	110 kDa		98.4	1	1	1	1.12	0.000468
1138	TRUE	CG40002 CG40002-PA [Drosophila melanogaster]	gi|62862658	11 kDa		50	1	1	4	10.6	0.00187
1062	TRUE	CG40042 CG40042-PB, isoform B [Drosophila melanogaster]	gi|161075876 (+1)	18 kDa		50	1	1	4	7.1	0.00187
315	TRUE	CG4019 CG4019-PA, isoform A [Drosophila melanogaster]	gi|20130305 (+3)	27 kDa		99.4	1	1	20	4.82	0.00936
823	TRUE	CG4038 CG4038-PA [Drosophila melanogaster]	gi|17137002	23 kDa		98.5	1	1	1	3.8	0.000468
62	TRUE	CG40451 CG40451-PA [Drosophila melanogaster]	gi|62862508	18 kDa		50	1	1	1	9.83	0.000468
388	TRUE	CG4164 CG4164-PA [Drosophila melanogaster]	gi|19920464	40 kDa		97.9	1	1	1	4.52	0.000468
904	TRUE	CG4199 CG4199-PF, isoform F [Drosophila melanogaster]	gi|45551208	73 kDa		99.7	1	1	2	1.95	0.000936
64	TRUE	CG4239 CG4239-PC, isoform C [Drosophila melanogaster]	gi|18859841 (+2)	30 kDa		99.3	1	1	2	3.62	0.000936
970	TRUE	CG4278 CG4278-PA [Drosophila melanogaster]	gi|19921430	32 kDa		50	1	1	2	4.45	0.000936
525	TRUE	CG4365 CG4365-PA, isoform A [Drosophila melanogaster]	gi|21356335 (+2)	34 kDa		99.2	1	1	3	5.54	0.0014
1117	TRUE	CG4398 CG4398-PA [Drosophila melanogaster]	gi|24654162	27 kDa		50	1	1	2	3.43	0.000936
135	TRUE	CG4447 CG4447-PA [Drosophila melanogaster]	gi|24661488	28 kDa		50	1	1	1	3.54	0.000468
534	TRUE	CG4538 CG4538-PA, isoform A [Drosophila melanogaster]	gi|24648289 (+1)	71 kDa		50	1	1	1	4.31	0.000468
616	TRUE	CG4586 CG4586-PA [Drosophila melanogaster]	gi|24640268	77 kDa		50	1	1	1	2.22	0.000468
136	TRUE	CG4673 CG4673-PA, isoform A [Drosophila melanogaster]	gi|62484318 (+1)	73 kDa		99.1	1	1	1	2.08	0.000468
250	TRUE	CG4686 CG4686-PA [Drosophila melanogaster]	gi|24648277	20 kDa		50	1	1	2	7.73	0.000936
1012	TRUE	CG4721 CG4721-PA [Drosophila melanogaster]	gi|24649148	81 kDa		97.9	1	1	1	1.6	0.000468
425	TRUE	CG4729 CG4729-PA, isoform A [Drosophila melanogaster]	gi|24665282 (+2)	44 kDa		99	1	1	1	2.85	0.000468
1042	TRUE	CG4747 CG4747-PA [Drosophila melanogaster]	gi|28574115	65 kDa		99.7	1	1	2	2.33	0.000936
445	TRUE	CG4750 CG4750-PC, isoform C [Drosophila melanogaster]	gi|161077148 (+1)	57 kDa		50	1	1	2	2.85	0.000936
759	TRUE	CG4847 CG4847-PA, isoform A [Drosophila melanogaster]	gi|19922450 (+4)	41 kDa		50	1	1	1	3.59	0.000468
447	TRUE	CG4851 CG4851-PA [Drosophila melanogaster]	gi|20129455	33 kDa		50	1	1	1	4.17	0.000468
1146	TRUE	CG4893 CG4893-PA [Drosophila melanogaster]	gi|21357209	21 kDa		50	1	1	1	4.17	0.000468
452	TRUE	CG5073 CG5073-PA [Drosophila melanogaster]	gi|24647146	24 kDa		99.1	1	1	1	4.81	0.000468
586	TRUE	CG5107 CG5107-PA [Drosophila melanogaster]	gi|21356733	24 kDa	FALSE	50	1	1	9	7.04	0.00421
208	TRUE	CG5131 CG5131-PA [Drosophila melanogaster]	gi|24584843	32 kDa		50	1	1	1	4.24	0.000468
804	TRUE	CG5188 CG5188-PA [Drosophila melanogaster]	gi|24583427	35 kDa		50	1	1	2	4.42	0.000936
102	TRUE	CG5288 CG5288-PB, isoform B [Drosophila melanogaster]	gi|21355577 (+2)	54 kDa		50	1	1	1	2.65	0.000468
741	TRUE	CG5323 CG5323-PA [Drosophila melanogaster]	gi|20130125	17 kDa		50	1	1	3	8.22	0.0014
1133	TRUE	CG5379 CG5379-PA [Drosophila melanogaster]	gi|116008410	35 kDa		50	1	1	1	3.96	0.000468
972	TRUE	CG5390 CG5390-PA [Drosophila melanogaster]	gi|20129425	45 kDa		50	1	1	1	3.69	0.000468
367	TRUE	CG5506 CG5506-PA [Drosophila melanogaster]	gi|24666167	20 kDa		50	1	1	1	10	0.000468
1015	TRUE	CG5525 CG5525-PA [Drosophila melanogaster]	gi|24583944	57 kDa		50	1	1	1	2.44	0.000468
765	TRUE	CG5630 CG5630-PB, isoform B [Drosophila melanogaster]	gi|161078461 (+1)	50 kDa		50	1	1	4	2.7	0.00187
968	TRUE	CG5642 CG5642-PA [Drosophila melanogaster]	gi|21358039	63 kDa		50	1	1	1	3.71	0.000468
195	TRUE	CG5802 CG5802-PB, isoform B [Drosophila melanogaster]	gi|161078465 (+1)	37 kDa		50	1	1	1	4.14	0.000468
199	TRUE	CG6000 CG6000-PA, isoform A [Drosophila melanogaster]	gi|45550806	17 kDa		50	1	1	4	7.43	0.00187
302	TRUE	CG6014 CG6014-PA [Drosophila melanogaster]	gi|21357267	97 kDa	FALSE	98.9	1	1	4	1.5	0.00187
18	TRUE	CG6016 CG6016-PA, isoform A [Drosophila melanogaster]	gi|24653393 (+1)	46 kDa		50	1	1	2	5.52	0.000936
1051	TRUE	CG6018 CG6018-PA [Drosophila melanogaster]	gi|24658187	64 kDa		50	1	1	1	2.12	0.000468
912	TRUE	CG6115 CG6115-PA [Drosophila melanogaster]	gi|24584758	10 kDa		50	1	1	1	10.6	0.000468
822	TRUE	CG6126 CG6126-PA [Drosophila melanogaster]	gi|21355657	61 kDa		50	1	1	1	1.8	0.000468
919	TRUE	CG6151 CG6151-PA, isoform A [Drosophila melanogaster]	gi|21358259	21 kDa		50	1	1	9	9.28	0.00421
614	TRUE	CG6180 CG6180-PA [Drosophila melanogaster]	gi|24583960	29 kDa		50	1	1	2	5.45	0.000936
209	TRUE	CG6225 CG6225-PB, isoform B [Drosophila melanogaster]	gi|161078230 (+1)	80 kDa		98.9	1	1	3	1.7	0.0014
634	TRUE	CG6310 CG6310-PA [Drosophila melanogaster]	gi|28574933	22 kDa		96.4	1	1	1	4.15	0.000468
409	TRUE	CG6359 CG6359-PA, isoform A [Drosophila melanogaster]	gi|21357265 (+1)	19 kDa		99.7	1	1	1	6.36	0.000468
977	TRUE	CG6416 CG6416-PA, isoform A [Drosophila melanogaster]	gi|24661058 (+1)	27 kDa	FALSE	50	1	1	15	19.7	0.00702
174	TRUE	CG6416 CG6416-PF, isoform F [Drosophila melanogaster]	gi|28574408	44 kDa	FALSE	50	1	1	5	25.9	0.00234
1184	TRUE	CG6608 CG6608-PA, isoform A [Drosophila melanogaster]	gi|21356397 (+1)	37 kDa		50	1	1	4	5.72	0.00187
16	TRUE	CG6746 CG6746-PA [Drosophila melanogaster]	gi|19921166	28 kDa		50	1	1	5	4.9	0.00234
1227	TRUE	CG6776 CG6776-PA [Drosophila melanogaster]	gi|21355779	28 kDa		50	1	1	2	4.15	0.000936
143	TRUE	CG6878 CG6878-PA [Drosophila melanogaster]	gi|21357437	8 kDa		50	1	1	3	21.5	0.0014
532	TRUE	CG6983 CG6983-PA [Drosophila melanogaster]	gi|21355797	20 kDa		98	1	1	1	9.44	0.000468
628	TRUE	CG7033 CG7033-PA, isoform A [Drosophila melanogaster]	gi|18858175 (+1)	58 kDa		50	1	1	1	2.25	0.000468
700	TRUE	CG7144 CG7144-PA [Drosophila melanogaster]	gi|23397395	103 kDa		50	1	1	2	2.16	0.000936
253	TRUE	CG7217 CG7217-PB, isoform B [Drosophila melanogaster]	gi|78706776 (+1)	20 kDa		97.9	1	1	2	5.79	0.000936
553	TRUE	CG7322 CG7322-PA [Drosophila melanogaster]	gi|24643142	26 kDa		50	1	1	1	4.96	0.000468
775	TRUE	CG7378 CG7378-PB, isoform B [Drosophila melanogaster]	gi|161077949 (+1)	26 kDa		50	1	1	1	4.42	0.000468
1043	TRUE	CG7380 CG7380-PA [Drosophila melanogaster]	gi|20129349	10 kDa		50	1	1	3	16.7	0.0014
256	TRUE	CG7382 CG7382-PA [Drosophila melanogaster]	gi|19920754	27 kDa		50	1	1	6	7.2	0.00281
606	TRUE	CG7394 CG7394-PA [Drosophila melanogaster]	gi|24662741	13 kDa		50	1	1	3	11.9	0.0014
272	TRUE	CG7506 CG7506-PA [Drosophila melanogaster]	gi|28574956	27 kDa		50	1	1	1	3.81	0.000468
1173	TRUE	CG7523 CG7523-PA [Drosophila melanogaster]	gi|24647735	29 kDa		50	1	1	1	7.69	0.000468
473	TRUE	CG7587 CG7587-PA [Drosophila melanogaster]	gi|24647711	16 kDa		50	1	1	9	9.15	0.00421
325	TRUE	CG7646 CG7646-PA, isoform A [Drosophila melanogaster]	gi|24667132 (+1)	21 kDa		50	1	1	1	20.5	0.000468
969	TRUE	CG7772 CG7772-PA [Drosophila melanogaster]	gi|18859915	18 kDa		98	1	1	1	5.49	0.000468
46	TRUE	CG7995 CG7995-PA, isoform A [Drosophila melanogaster]	gi|24655555 (+4)	65 kDa		50	1	1	3	2.6	0.0014
320	TRUE	CG8031 CG8031-PA [Drosophila melanogaster]	gi|21357419	33 kDa		50	1	1	1	3.73	0.000468
332	TRUE	CG8066 CG8066-PA [Drosophila melanogaster]	gi|24646857	11 kDa		50	1	1	1	14.4	0.000468
242	TRUE	CG8193 CG8193-PA [Drosophila melanogaster]	gi|19921864	79 kDa		50	1	1	1	1.46	0.000468
395	TRUE	CG8199 CG8199-PA [Drosophila melanogaster]	gi|21355903	50 kDa		50	1	1	1	3.87	0.000468
504	TRUE	CG8258 CG8258-PA [Drosophila melanogaster]	gi|19921848	59 kDa		99.3	1	1	1	2.56	0.000468
1057	TRUE	CG8320 CG8320-PA [Drosophila melanogaster]	gi|24653986	20 kDa		50	1	1	2	6.9	0.000936
854	TRUE	CG8331 CG8331-PA [Drosophila melanogaster]	gi|24653560	20 kDa		50	1	1	2	4.49	0.000936
530	TRUE	CG8475 CG8475-PA, isoform A [Drosophila melanogaster]	gi|24582722	125 kDa		99.1	1	1	1	1.83	0.000468
415	TRUE	CG8531 CG8531-PA [Drosophila melanogaster]	gi|19922238	61 kDa		99	1	1	1	2.02	0.000468
405	TRUE	CG8654 CG8654-PA [Drosophila melanogaster]	gi|19922616	56 kDa		50	1	1	1	3.19	0.000468
163	TRUE	CG8680 CG8680-PA [Drosophila melanogaster]	gi|20129243	14 kDa		99.9	1	1	2	6.35	0.000936
1143	TRUE	CG8768 CG8768-PA [Drosophila melanogaster]	gi|28573846	33 kDa		98.1	1	1	2	5.3	0.000936
735	TRUE	CG8885 CG8885-PA [Drosophila melanogaster]	gi|19920710	28 kDa		50	1	1	1	7.17	0.000468
710	TRUE	CG9034 CG9034-PA [Drosophila melanogaster]	gi|21358417	8 kDa		50	1	1	3	9.09	0.0014
703	TRUE	CG9099 CG9099-PA [Drosophila melanogaster]	gi|18859973	21 kDa		50	1	1	1	5.29	0.000468
929	TRUE	CG9186 CG9186-PB, isoform B [Drosophila melanogaster]	gi|19923042 (+1)	36 kDa		50	1	1	1	3.58	0.000468
490	TRUE	CG9216 CG9216-PA, isoform A [Drosophila melanogaster]	gi|24642404 (+1)	172 kDa		50	1	1	1	0.724	0.000468
930	TRUE	CG9243 CG9243-PB, isoform B [Drosophila melanogaster]	gi|116007352	66 kDa		99.6	1	1	2	2.09	0.000936
669	TRUE	CG9248 CG9248-PB, isoform B [Drosophila melanogaster]	gi|20129681 (+1)	56 kDa		98.7	1	1	4	3.24	0.00187
27	TRUE	CG9249 CG9249-PA [Drosophila melanogaster]	gi|24585589	34 kDa		99.3	1	1	2	4.19	0.000936
112	TRUE	CG9302 CG9302-PA [Drosophila melanogaster]	gi|24584105	58 kDa		50	1	1	1	2.35	0.000468
1125	TRUE	CG9350 CG9350-PA [Drosophila melanogaster]	gi|19922660	18 kDa		50	1	2	3	7.65	0.0014
880	TRUE	CG9391 CG9391-PA, isoform A [Drosophila melanogaster]	gi|21357329 (+1)	31 kDa		50	1	1	2	4.45	0.000936
817	TRUE	CG9416 CG9416-PA [Drosophila melanogaster]	gi|28573701	98 kDa		50	1	1	2	1.51	0.000936
577	TRUE	CG9465 CG9465-PA [Drosophila melanogaster]	gi|24582926	108 kDa		50	1	1	1	1.8	0.000468
1149	TRUE	CG9527 CG9527-PA [Drosophila melanogaster]	gi|45550141	79 kDa		99.8	1	1	3	2.56	0.0014
507	TRUE	CG9547 CG9547-PA [Drosophila melanogaster]	gi|19920834	46 kDa		99.8	1	1	1	4.06	0.000468
659	TRUE	CG9911 CG9911-PA, isoform A [Drosophila melanogaster]	gi|18860011 (+3)	47 kDa		98	1	1	3	3.73	0.0014
297	TRUE	CG9921 CG9921-PA [Drosophila melanogaster]	gi|18860015	11 kDa		50	1	1	8	12.7	0.00374
113	TRUE	Chd64 CG14996-PB [Drosophila melanogaster]	gi|21355917	21 kDa		50	1	1	7	5.85	0.00328
212	TRUE	cheerio CG3937-PD, isoform D [Drosophila melanogaster]	gi|45553391 (+1)	275 kDa		98.8	1	1	1	0.317	0.000468
990	TRUE	chickadee CG9553-PA, isoform A [Drosophila melanogaster]	gi|17136958 (+3)	14 kDa		50	1	1	4	7.14	0.00187
56	TRUE	Chromatin assembly factor 1 subunit CG4236-PA [Drosophila melanogaster]	gi|17933648	49 kDa		50	1	1	1	3.02	0.000468
506	TRUE	Contactin CG1084-PA [Drosophila melanogaster]	gi|28571501	158 kDa		99	1	1	1	1.08	0.000468
477	TRUE	Copper transporter 1B CG7459-PA [Drosophila melanogaster]	gi|21355095	20 kDa		50	1	1	1	10.9	0.000468
1097	TRUE	cornichon CG5855-PB, isoform B [Drosophila melanogaster]	gi|17137046 (+1)	17 kDa		50	1	1	2	4.17	0.000936
1075	TRUE	cortex CG11330-PA [Drosophila melanogaster]	gi|17647275	56 kDa		97.5	1	1	1	1.45	0.000468
1044	TRUE	CSN8 CG13383-PB [Drosophila melanogaster]	gi|78742340	21 kDa		50	1	1	1	4.95	0.000468
1167	TRUE	Cuticular protein 49Ae CG8505-PA [Drosophila melanogaster]	gi|28573391	14 kDa		50	1	1	6	9.7	0.00281
953	TRUE	Cuticular protein 64Ab CG15007-PA [Drosophila melanogaster]	gi|161081372	12 kDa		50	1	1	6	10.8	0.00281
548	TRUE	Cyp12a4 CG6042-PA [Drosophila melanogaster]	gi|24648130	62 kDa		50	1	1	1	3.17	0.000468
407	TRUE	Cyp4d20 CG16761-PA [Drosophila melanogaster]	gi|24656064	58 kDa		98.9	1	1	2	3.73	0.000936
973	TRUE	Cyp6g1 CG8453-PA [Drosophila melanogaster]	gi|24652913	60 kDa		50	1	1	2	2.29	0.000936
697	TRUE	Cyp9f2 CG11466-PA, isoform A [Drosophila melanogaster]	gi|21357069 (+1)	60 kDa		50	1	1	5	3.45	0.00234
1164	TRUE	cytochrome b [Drosophila melanogaster]	gi|5835245	43 kDa		50	1	1	1	2.38	0.000468
59	TRUE	Dak1 CG6092-PA [Drosophila melanogaster]	gi|21356893	28 kDa		50	1	1	1	5.14	0.000468
413	TRUE	delta-coatomer protein CG14813-PA [Drosophila melanogaster]	gi|21355081	58 kDa		50	1	1	1	2.26	0.000468
1151	TRUE	Diazepam-binding inhibitor CG8627-PA, isoform A [Drosophila melanogaster]	gi|24659809 (+1)	10 kDa		50	1	1	1	12.8	0.000468
734	TRUE	Dihydroorotate dehydrogenase CG9741-PA, isoform A [Drosophila melanogaster]	gi|17137316 (+2)	44 kDa		50	1	1	4	3.94	0.00187
699	TRUE	DNA-polymerase-delta CG5949-PA [Drosophila melanogaster]	gi|24664937	125 kDa		96.2	1	1	1	1.1	0.000468
336	TRUE	dodo CG17051-PA [Drosophila melanogaster]	gi|17647355	18 kDa		98.4	1	1	1	7.83	0.000468
280	TRUE	Dorsal-related immunity factor CG6794-PA, isoform A [Drosophila melanogaster]	gi|24584816 (+1)	74 kDa		99.2	1	1	7	2.1	0.00328
590	TRUE	downstream of receptor kinase CG6033-PA, isoform A [Drosophila melanogaster]	gi|17136708 (+5)	24 kDa		50	1	1	7	6.64	0.00328
1217	TRUE	Dynamin associated protein 160 CG1099-PA, isoform A [Drosophila melanogaster]	gi|17137488 (+1)	121 kDa		98.1	1	1	1	1.48	0.000468
599	TRUE	Dynein heavy chain 64C CG7507-PA, isoform A [Drosophila melanogaster]	gi|24658015	530 kDa		100	1	1	2	0.388	0.000936
709	TRUE	Ecdysone-inducible gene L3 CG10160-PA [Drosophila melanogaster]	gi|17136226	36 kDa		99.4	1	1	1	3.31	0.000468
219	TRUE	ECSIT CG10610-PA [Drosophila melanogaster]	gi|24644458	47 kDa		99.5	1	1	3	6.36	0.0014
392	TRUE	eEF1delta CG4912-PB, isoform B [Drosophila melanogaster]	gi|19921046 (+1)	29 kDa		98	1	1	3	6.99	0.0014
131	TRUE	eIF3-S8 CG4954-PA [Drosophila melanogaster]	gi|19922464	106 kDa		98.3	1	1	2	1.32	0.000936
998	TRUE	Ejaculatory bulb protein III CG11390-PA [Drosophila melanogaster]	gi|24762502	15 kDa		50	1	1	1	8.73	0.000468
440	TRUE	Elongation factor 1 beta CG6341-PA [Drosophila melanogaster]	gi|45549259	29 kDa		98.1	1	1	3	4.21	0.0014
489	TRUE	Elongin B CG4204-PA [Drosophila melanogaster]	gi|17738069	13 kDa		99.9	1	1	1	10.2	0.000468
381	TRUE	Ero1L CG1333-PB, isoform B [Drosophila melanogaster]	gi|24657303 (+1)	56 kDa		50	1	1	1	2.9	0.000468
1169	TRUE	Eukaryotic initiation factor 3 p40 subunit CG9124-PA, isoform A [Drosophila melanogaster]	gi|45549263 (+1)	38 kDa		50	1	1	1	2.96	0.000468
1152	TRUE	Eukaryotic initiation factor 3 p66 subunit CG10161-PB [Drosophila melanogaster]	gi|24649360	64 kDa		50	1	2	2	2.5	0.000936
527	TRUE	Eukaryotic initiation factor 4a CG9075-PC, isoform C [Drosophila melanogaster]	gi|17136248 (+3)	46 kDa		99.1	1	1	1	1.99	0.000468
1017	TRUE	eukaryotic release factor 1 CG5605-PA, isoform A [Drosophila melanogaster]	gi|21356433 (+5)	49 kDa		50	1	1	1	4.34	0.000468
188	TRUE	Excitatory amino acid transporter 1 CG3747-PA, isoform A [Drosophila melanogaster]	gi|17137668 (+2)	52 kDa		50	1	1	4	2.3	0.00187
536	TRUE	failed axon connections CG4609-PA, isoform A [Drosophila melanogaster]	gi|28574889 (+1)	47 kDa		50	1	1	9	4.82	0.00421
14	TRUE	Fasciclin 2 CG3665-PA, isoform A [Drosophila melanogaster]	gi|17933556 (+2)	97 kDa		98	1	1	1	2.22	0.000468
96	TRUE	Fat body protein 2 CG3763-PA [Drosophila melanogaster]	gi|17647419	29 kDa		99.5	1	1	1	3.12	0.000468
467	TRUE	fau CG6544-PB, isoform B [Drosophila melanogaster]	gi|24645759	19 kDa	FALSE	98.4	1	1	2	7.98	0.000936
157	TRUE	Fibrillarin CG9888-PA [Drosophila melanogaster]	gi|17647425	35 kDa		99.4	1	1	1	4.07	0.000468
648	TRUE	FK506-binding protein 1 CG6226-PA [Drosophila melanogaster]	gi|24647110	39 kDa		95.6	1	1	1	1.96	0.000468
362	TRUE	FK506-binding protein 2 CG11001-PA [Drosophila melanogaster]	gi|24655568	12 kDa		97.7	1	1	8	15.7	0.00374
1119	TRUE	fructose-1,6-bisphosphatase CG31692-PA, isoform A [Drosophila melanogaster]	gi|19921562 (+1)	36 kDa		98	1	1	1	2.62	0.000468
107	TRUE	G protein beta-subunit 13F CG10545-PA, isoform A [Drosophila melanogaster]	gi|17933598 (+5)	37 kDa		50	1	1	1	3.24	0.000468
1089	TRUE	G protein gamma 1 CG8261-PC, isoform C [Drosophila melanogaster]	gi|17647467 (+4)	8 kDa		99.4	1	1	2	12.9	0.000936
1212	TRUE	GDP dissociation inhibitor CG4422-PA [Drosophila melanogaster]	gi|24583049	50 kDa		98	1	1	2	2.71	0.000936
138	TRUE	Gelsolin CG1106-PG, isoform G [Drosophila melanogaster]	gi|116008559 (+5)	97 kDa		99.9	1	1	1	1.26	0.000468
815	TRUE	globin 1 CG9734-PB, isoform B [Drosophila melanogaster]	gi|17737989 (+3)	17 kDa		50	1	1	3	7.84	0.0014
1226	TRUE	Glued CG9206-PA [Drosophila melanogaster]	gi|17647469	141 kDa		50	1	1	2	1.34	0.000936
151	TRUE	Glyceraldehyde 3 phosphate dehydrogenase 2 CG8893-PB, isoform B [Drosophila melanogaster]	gi|17933600 (+1)	35 kDa	FALSE	50	1	1	12	27.4	0.00561
153	TRUE	granny smith CG7340-PA, isoform A [Drosophila melanogaster]	gi|24646410 (+1)	71 kDa	FALSE	99.7	1	1	1	5.32	0.000468
401	TRUE	Grasp65 CG7809-PA [Drosophila melanogaster]	gi|24667089	48 kDa		98.1	1	1	1	2.61	0.000468
643	TRUE	GTP-binding protein CG2522-PA [Drosophila melanogaster]	gi|24641198	68 kDa		98.4	1	1	1	1.79	0.000468
728	TRUE	Helicase 89B CG4261-PA [Drosophila melanogaster]	gi|24647318	214 kDa		98.5	1	1	2	0.518	0.000936
680	TRUE	Hemolectin CG7002-PA [Drosophila melanogaster]	gi|24663920	426 kDa		98.9	1	1	1	0.494	0.000468
736	TRUE	Heterogeneous nuclear ribonucleoprotein at 87F CG12749-PB, isoform B [Drosophila melanogaster]	gi|17136622 (+1)	34 kDa		99.4	1	1	1	2.34	0.000468
1037	TRUE	Hexosaminidase 1 CG1318-PA, isoform A [Drosophila melanogaster]	gi|17647501 (+2)	71 kDa		99.5	1	1	3	1.65	0.0014
286	TRUE	Hrp59 CG9373-PA [Drosophila melanogaster]	gi|24645384	67 kDa		99.4	1	1	1	3.16	0.000468
631	TRUE	innexin 3 CG1448-PA [Drosophila melanogaster]	gi|17864322	45 kDa		50	1	1	1	4.81	0.000468
747	TRUE	Int6 homologue CG9677-PA [Drosophila melanogaster]	gi|17137592	51 kDa		50	1	1	1	2.3	0.000468
218	TRUE	ion transport peptide CG13586-PB, isoform B [Drosophila melanogaster]	gi|116007742 (+1)	18 kDa		50	1	1	2	5.77	0.000936
672	TRUE	jaguar CG5695-PB, isoform B [Drosophila melanogaster]	gi|24649614 (+5)	143 kDa		50	1	1	2	1.18	0.000936
1113	TRUE	jagunal CG10978-PA, isoform A [Drosophila melanogaster]	gi|24644404 (+1)	23 kDa		50	1	1	4	8.12	0.00187
670	TRUE	Juvenile hormone-inducible protein 1 CG3298-PB [Drosophila melanogaster]	gi|24652403	86 kDa		50	1	1	1	1.04	0.000468
1059	TRUE	Karyopherin beta 3 CG1059-PA [Drosophila melanogaster]	gi|17737759	124 kDa		50	1	1	1	1.36	0.000468
1158	TRUE	Lasp CG3849-PA, isoform A [Drosophila melanogaster]	gi|28574882 (+1)	56 kDa		50	1	1	1	1.83	0.000468
555	TRUE	lectin-28C CG7106-PA [Drosophila melanogaster]	gi|21357549	26 kDa		99.3	1	1	1	6.11	0.000468
68	TRUE	lethal (1) G0022 CG8231-PA [Drosophila melanogaster]	gi|18859933	58 kDa		99.5	1	1	3	3	0.0014
689	TRUE	lethal (2) 05070 CG8392-PA [Drosophila melanogaster]	gi|24653999	24 kDa		50	1	1	2	4.46	0.000936
1127	TRUE	Leucokinin CG13480-PA [Drosophila melanogaster]	gi|24664203	18 kDa		50	1	1	2	5.62	0.000936
296	TRUE	Lissencephaly-1 CG8440-PA, isoform A [Drosophila melanogaster]	gi|17137196 (+5)	46 kDa		99.8	1	1	1	3.65	0.000468
512	TRUE	Lysozyme D CG9118-PA [Drosophila melanogaster]	gi|17136652 (+3)	16 kDa		50	1	1	1	6.43	0.000468
348	TRUE	Mediator complex subunit 9 CG5134-PB, isoform B [Drosophila melanogaster]	gi|28573549	20 kDa		50	1	1	1	6.29	0.000468
993	TRUE	microtubule star CG7109-PA [Drosophila melanogaster]	gi|17136620	35 kDa		50	1	1	1	3.56	0.000468
1008	TRUE	mitochondrial ribosomal protein L17 CG13880-PA [Drosophila melanogaster]	gi|24654665	21 kDa		50	1	1	3	5.68	0.0014
305	TRUE	mitochondrial ribosomal protein L20 CG11258-PA [Drosophila melanogaster]	gi|17647671	17 kDa		50	1	1	4	6.67	0.00187
558	TRUE	mitochondrial ribosomal protein L23 CG1320-PA [Drosophila melanogaster]	gi|17647675	18 kDa		50	1	1	5	4.67	0.00234
690	TRUE	mitochondrial ribosomal protein L24 CG8849-PA [Drosophila melanogaster]	gi|17647677	29 kDa		50	1	1	2	6.07	0.000936
841	TRUE	mitochondrial ribosomal protein L38 CG15871-PA [Drosophila melanogaster]	gi|24641946	48 kDa		50	1	1	3	3.37	0.0014
36	TRUE	mitochondrial ribosomal protein L42 CG12921-PA [Drosophila melanogaster]	gi|17647695	14 kDa		50	1	1	3	8.06	0.0014
8	TRUE	mitochondrial ribosomal protein L50 CG8612-PA [Drosophila melanogaster]	gi|21357011	21 kDa		50	1	1	2	7.41	0.000936
322	TRUE	mitochondrial ribosomal protein L9 CG31478-PA [Drosophila melanogaster]	gi|28571728	29 kDa		50	1	1	1	6.85	0.000468
1159	TRUE	mitochondrial ribosomal protein S11 CG5184-PA, isoform A [Drosophila melanogaster]	gi|17738009	22 kDa		98.9	1	1	1	7	0.000468
813	TRUE	mitochondrial ribosomal protein S14 CG32531-PA [Drosophila melanogaster]	gi|24643241	15 kDa		50	1	1	4	9.38	0.00187
1137	TRUE	mitochondrial ribosomal protein S18B CG10757-PA, isoform A [Drosophila melanogaster]	gi|17647685 (+1)	23 kDa		50	1	1	1	14.2	0.000468
1155	TRUE	mitochondrial ribosomal protein S21 CG32854-PA [Drosophila melanogaster]	gi|24646553	11 kDa		50	1	1	6	16.1	0.00281
1222	TRUE	mitochondrial ribosomal protein S30 CG8470-PA [Drosophila melanogaster]	gi|17530957	65 kDa		50	1	1	1	2.51	0.000468
988	TRUE	mitochondrial ribosomal protein S35 CG2101-PA [Drosophila melanogaster]	gi|17647689	38 kDa		50	1	1	1	3.99	0.000468
546	TRUE	mitochondrial ribosomal protein S5 CG40049-PC, isoform C [Drosophila melanogaster]	gi|116007908 (+2)	46 kDa	FALSE	50	1	1	1	1.31	0.000468
920	TRUE	mitochondrial ribosomal protein S7 CG5108-PA [Drosophila melanogaster]	gi|17647699	25 kDa		50	1	1	3	5.5	0.0014
1179	TRUE	Mov34 CG3416-PA [Drosophila melanogaster]	gi|24762618	38 kDa		50	1	1	1	2.66	0.000468
1084	TRUE	mRpS23 CG31842-PA [Drosophila melanogaster]	gi|24584213	22 kDa		50	1	1	2	8.99	0.000936
761	TRUE	Myo31DF CG7438-PA, isoform A [Drosophila melanogaster]	gi|17647709 (+1)	117 kDa		50	1	1	1	0.989	0.000468
1124	TRUE	Myosin heavy chain CG17927-PD, isoform D [Drosophila melanogaster]	gi|24584702 (+1)	224 kDa	FALSE	99.4	1	1	38	54.4	0.0178
476	TRUE	Myosin heavy chain CG17927-PK, isoform K [Drosophila melanogaster]	gi|24584712	221 kDa	FALSE	99.3	1	1	1	52	0.000468
337	TRUE	Na/Ca-exchange protein CG5685-PA, isoform A [Drosophila melanogaster]	gi|24648584 (+2)	106 kDa		96	1	1	1	1.68	0.000468
93	TRUE	NADH dehydrogenase subunit 3 [Drosophila melanogaster]	gi|5835240	14 kDa		50	1	1	11	9.4	0.00515
751	TRUE	Neb-cGP CG15304-PA [Drosophila melanogaster]	gi|21358399	5 kDa		50	1	1	4	20.8	0.00187
374	TRUE	NEM-sensitive fusion protein 2 CG33101-PA [Drosophila melanogaster]	gi|28573010	83 kDa		98	1	1	1	1.73	0.000468
1065	TRUE	Nipped-A CG33554-PA, isoform A [Drosophila melanogaster]	gi|161076329	437 kDa		98.7	1	1	1	0.526	0.000468
334	TRUE	NTPase CG3059-PA, isoform A [Drosophila melanogaster]	gi|17137562 (+3)	51 kDa		50	1	1	1	7.75	0.000468
649	TRUE	Nup62 CG6251-PA [Drosophila melanogaster]	gi|20130049	41 kDa		50	1	1	1	3.3	0.000468
366	TRUE	Obp44a CG2297-PA [Drosophila melanogaster]	gi|19921806	16 kDa		50	1	1	1	8.39	0.000468
952	TRUE	Odorant-binding protein 99c CG7584-PA [Drosophila melanogaster]	gi|24651098	17 kDa		50	1	1	6	8.61	0.00281
495	TRUE	Oligosaccharyl transferase 3 CG7748-PA [Drosophila melanogaster]	gi|17738187	88 kDa		50	1	1	1	1.94	0.000468
259	TRUE	Ornithine aminotransferase precursor CG8782-PA [Drosophila melanogaster]	gi|21357415	47 kDa		50	1	1	1	3.02	0.000468
967	TRUE	Osiris 14 CG1155-PA [Drosophila melanogaster]	gi|21357651	28 kDa		50	1	1	1	7.84	0.000468
1191	TRUE	oxen CG8764-PA [Drosophila melanogaster]	gi|17136912	6 kDa		98.3	1	1	3	14.5	0.0014
1058	TRUE	Palmitoyl-protein thioesterase 1 CG12108-PA [Drosophila melanogaster]	gi|24640652	36 kDa		97.8	1	1	2	4.14	0.000936
1038	TRUE	pathetic CG3424-PA, isoform A [Drosophila melanogaster]	gi|21355283 (+1)	52 kDa		50	1	1	1	3.6	0.000468
707	TRUE	Phosphatidylinositol synthase CG9245-PA, isoform A [Drosophila melanogaster]	gi|24642243	26 kDa		50	1	1	1	4.91	0.000468
832	TRUE	Phosphogluconate dehydrogenase CG3724-PA [Drosophila melanogaster]	gi|24639279	52 kDa		99.9	1	1	1	2.08	0.000468
1050	TRUE	Phosphoglucose isomerase CG8251-PA, isoform A [Drosophila melanogaster]	gi|17737445 (+2)	62 kDa		50	1	1	9	2.69	0.00421
960	TRUE	Phosphoglyceromutase CG1721-PA, isoform A [Drosophila melanogaster]	gi|24650981 (+2)	29 kDa		50	1	1	1	3.92	0.000468
126	TRUE	polychaetoid CG31349-PG, isoform G [Drosophila melanogaster]	gi|161078102 (+6)	142 kDa		50	1	1	2	0.999	0.000936
1110	TRUE	PRL-1 CG4993-PB, isoform B [Drosophila melanogaster]	gi|19921348 (+1)	20 kDa		50	1	1	1	10.8	0.000468
198	TRUE	Prosbeta3 CG11981-PA [Drosophila melanogaster]	gi|21355629	23 kDa		50	1	1	1	6.34	0.000468
721	TRUE	Protoporphyrinogen oxidase CG5796-PA [Drosophila melanogaster]	gi|24649745	53 kDa		99.7	1	1	1	2.53	0.000468
661	TRUE	Pyruvate dehydrogenase kinase CG8808-PB, isoform B [Drosophila melanogaster]	gi|161076454 (+1)	48 kDa		99.5	1	1	1	3.55	0.000468
338	TRUE	Pyruvate dehydrogenase phosphatase CG12151-PA [Drosophila melanogaster]	gi|18858005	54 kDa		98.5	1	1	1	3.79	0.000468
950	TRUE	Rab-protein 10 CG17060-PA [Drosophila melanogaster]	gi|17737369	23 kDa	FALSE	50	1	1	2	16.7	0.000936
1214	TRUE	Rab-related protein 4 CG3129-PA [Drosophila melanogaster]	gi|24639915	22 kDa		50	1	1	2	5.58	0.000936
944	TRUE	Rae1 CG9862-PA [Drosophila melanogaster]	gi|20130217	39 kDa		50	1	1	1	3.47	0.000468
1048	TRUE	ran CG1404-PA, isoform A [Drosophila melanogaster]	gi|21356159 (+1)	25 kDa		50	1	1	1	6.02	0.000468
1002	TRUE	Ras-associated protein 2-like CG3204-PA, isoform A [Drosophila melanogaster]	gi|17137620	20 kDa		50	1	1	2	7.14	0.000936
954	TRUE	Ras-related protein CG2849-PC, isoform C [Drosophila melanogaster]	gi|17933550 (+2)	23 kDa		98.2	1	1	1	7.11	0.000468
24	TRUE	Rhythmically expressed gene 2 CG3200-PA [Drosophila melanogaster]	gi|19923000	30 kDa		98.9	1	1	2	6.54	0.000936
191	TRUE	Ribosomal protein L17 CG3203-PD, isoform D [Drosophila melanogaster]	gi|18921137 (+3)	22 kDa		50	1	2	4	5.38	0.00187
1156	TRUE	Ribosomal protein L21 CG12775-PA [Drosophila melanogaster]	gi|20129705	18 kDa		97.8	1	2	14	5.03	0.00655
1079	TRUE	Ribosomal protein L27 CG4759-PA [Drosophila melanogaster]	gi|24650124	16 kDa		50	1	2	9	7.41	0.00421
861	TRUE	Ribosomal protein L27A CG15442-PA [Drosophila melanogaster]	gi|17136880	17 kDa		100	1	2	7	6.04	0.00328
911	TRUE	Ribosomal protein L35A CG2099-PA [Drosophila melanogaster]	gi|21356927	18 kDa		98.8	1	1	1	6.37	0.000468
913	TRUE	Ribosomal protein L37A CG5827-PA, isoform A [Drosophila melanogaster]	gi|17864394 (+1)	10 kDa		50	1	1	3	9.78	0.0014
694	TRUE	Ribosomal protein L37a CG9091-PA [Drosophila melanogaster]	gi|24642107	11 kDa		50	1	1	2	12.9	0.000936
592	TRUE	Ribosomal protein L40 CG2960-PA [Drosophila melanogaster]	gi|17136570 (+5)	15 kDa		50	1	1	38	10.3	0.0178
793	TRUE	Ribosomal protein LP2 CG4918-PA, isoform A [Drosophila melanogaster]	gi|17647887 (+1)	12 kDa		98.8	1	1	6	6.19	0.00281
573	TRUE	Ribosomal protein S10b CG14206-PC, isoform C [Drosophila melanogaster]	gi|19920344 (+1)	18 kDa		99.8	1	1	10	8.12	0.00468
725	TRUE	Ribosomal protein S11 CG8857-PA, isoform A [Drosophila melanogaster]	gi|20129901 (+1)	18 kDa		100	1	1	5	6.45	0.00234
421	TRUE	Ribosomal protein S15Aa CG2033-PD, isoform D [Drosophila melanogaster]	gi|17975567 (+3)	15 kDa	FALSE	50	1	1	3	32.3	0.0014
5	TRUE	Ribosomal protein S20 CG15693-PA [Drosophila melanogaster]	gi|17738077	13 kDa		50	1	2	5	10	0.00234
521	TRUE	Ribosomal protein S24 CG3751-PA [Drosophila melanogaster]	gi|20130247	15 kDa		50	1	1	1	12.2	0.000468
115	TRUE	Ribosomal protein S26 CG10305-PB, isoform B [Drosophila melanogaster]	gi|17647893 (+2)	13 kDa		50	1	1	2	7.89	0.000936
255	TRUE	Ribosomal protein S28b CG2998-PA [Drosophila melanogaster]	gi|18858095	7 kDa		98.5	1	1	2	13.8	0.000936
994	TRUE	Ribosomal protein S30 CG15697-PA, isoform A [Drosophila melanogaster]	gi|24648549 (+1)	15 kDa		50	1	1	1	7.58	0.000468
629	TRUE	Rpn5 CG1100-PA [Drosophila melanogaster]	gi|21357319	58 kDa		50	1	1	1	3.19	0.000468
1224	TRUE	Rpn9 CG10230-PA, isoform A [Drosophila melanogaster]	gi|24649395 (+1)	44 kDa		99.3	1	1	1	2.62	0.000468
241	TRUE	Salivary gland secretion 3 CG11720-PA [Drosophila melanogaster]	gi|17737563	32 kDa		98.3	1	1	7	3.91	0.00328
737	TRUE	Salivary gland secretion 8 CG6132-PA [Drosophila melanogaster]	gi|24662704	8 kDa		50	1	1	1	26.7	0.000468
636	TRUE	SC35 CG5442-PB, isoform B [Drosophila melanogaster]	gi|21358099 (+1)	21 kDa		50	1	1	2	14.3	0.000936
492	TRUE	sec13 CG6773-PA [Drosophila melanogaster]	gi|21356113	40 kDa		50	1	1	1	3.37	0.000468
274	TRUE	sec5 CG8843-PA [Drosophila melanogaster]	gi|19920648	101 kDa		50	1	1	1	1.34	0.000468
795	TRUE	Senescence marker protein-30 CG7390-PA, isoform A [Drosophila melanogaster]	gi|24646910 (+1)	33 kDa		50	1	1	1	5.28	0.000468
1118	TRUE	Serine protease inhibitor 1 CG9456-PA [Drosophila melanogaster]	gi|24586111	41 kDa		50	1	1	1	2.96	0.000468
213	TRUE	Sh3beta CG8582-PA, isoform A [Drosophila melanogaster]	gi|24660041 (+1)	17 kDa		50	1	1	2	10.8	0.000936
1064	TRUE	shibire CG18102-PH, isoform H [Drosophila melanogaster]	gi|116007166 (+8)	93 kDa		99.3	1	1	2	1.81	0.000936
156	TRUE	shotgun CG3722-PA [Drosophila melanogaster]	gi|17136470	170 kDa		50	1	1	1	0.929	0.000468
389	TRUE	shrub CG8055-PA [Drosophila melanogaster]	gi|28573949	25 kDa		50	1	1	3	5.31	0.0014
406	TRUE	Signal recognition particle protein 19 CG4457-PA [Drosophila melanogaster]	gi|24659997	18 kDa		50	1	1	1	8.12	0.000468
186	TRUE	skiff CG30021-PA [Drosophila melanogaster]	gi|24652624	63 kDa		50	1	1	1	2.7	0.000468
630	TRUE	skpA CG16983-PA, isoform A [Drosophila melanogaster]	gi|17137600 (+7)	19 kDa		50	1	1	2	6.79	0.000936
615	TRUE	SLY-1 homologous CG3539-PD, isoform D [Drosophila melanogaster]	gi|45552181 (+1)	75 kDa		50	1	1	2	2.5	0.000936
414	TRUE	Small ribonucleoprotein particle protein B CG5352-PA [Drosophila melanogaster]	gi|17136806	21 kDa		97.6	1	1	2	7.04	0.000936
1170	TRUE	sniffer CG10964-PA [Drosophila melanogaster]	gi|24640547	27 kDa		50	1	1	1	6.48	0.000468
1063	TRUE	spaghetti squash CG3595-PA [Drosophila melanogaster]	gi|17530815	20 kDa		50	1	1	4	6.32	0.00187
1052	TRUE	Spase 18/21-subunit CG2358-PA [Drosophila melanogaster]	gi|21358147	21 kDa		50	1	1	2	4.32	0.000936
99	TRUE	spinster CG8428-PC, isoform C [Drosophila melanogaster]	gi|24654037 (+1)	66 kDa		50	1	1	2	1.98	0.000936
957	TRUE	Spz3 CG7104-PA [Drosophila melanogaster]	gi|24582628	67 kDa		50	1	1	1	1.8	0.000468
695	TRUE	Srp72 CG5434-PA [Drosophila melanogaster]	gi|24648453	73 kDa		50	1	1	1	2	0.000468
423	TRUE	stonewall CG3836-PA [Drosophila melanogaster]	gi|24664166	113 kDa		97.6	1	1	2	0.771	0.000936
510	TRUE	stunted CG9032-PA, isoform A [Drosophila melanogaster]	gi|17864256 (+1)	7 kDa		50	1	1	5	26.3	0.00234
942	TRUE	Sug CG7334-PA, isoform A [Drosophila melanogaster]	gi|24662825 (+1)	64 kDa		50	1	1	1	1.85	0.000468
400	TRUE	Suppressor of variegation 205 CG8409-PA, isoform A [Drosophila melanogaster]	gi|17136528 (+1)	23 kDa		50	1	1	1	7.28	0.000468
557	TRUE	Synapse protein 24 CG9474-PA [Drosophila melanogaster]	gi|17737875	24 kDa		98.1	1	1	2	6.6	0.000936
1174	TRUE	Syndecan CG10497-PA, isoform A [Drosophila melanogaster]	gi|17136884	42 kDa		99.3	1	2	12	6.52	0.00561
863	TRUE	Tal CG2827-PA [Drosophila melanogaster]	gi|45549185	37 kDa		97.7	1	1	2	4.83	0.000936
306	TRUE	terribly reduced optic lobes CG33950-PG, isoform G [Drosophila melanogaster]	gi|161077537	459 kDa	FALSE	50	1	1	4	25.6	0.00187
668	TRUE	Tetraspanin 42Ei CG12843-PA [Drosophila melanogaster]	gi|24586157	25 kDa		50	1	1	2	5.68	0.000936
300	TRUE	Tetraspanin 66E CG4999-PA, isoform A [Drosophila melanogaster]	gi|17648083 (+2)	30 kDa		50	1	1	1	5.99	0.000468
84	TRUE	thioredoxin peroxidase 2 CG1274-PA, isoform A [Drosophila melanogaster]	gi|17864676 (+1)	27 kDa		50	1	1	1	4.55	0.000468
3	TRUE	Tim9a CG1660-PA [Drosophila melanogaster]	gi|18860073	11 kDa		50	1	1	1	11.6	0.000468
1049	TRUE	Tim9b CG17767-PC, isoform C [Drosophila melanogaster]	gi|78706546 (+1)	14 kDa		50	1	1	1	6.84	0.000468
498	TRUE	Topoisomerase 2 CG10223-PA [Drosophila melanogaster]	gi|17136538	164 kDa		98	1	1	1	0.484	0.000468
391	TRUE	TRAM CG11642-PA, isoform A [Drosophila melanogaster]	gi|24638995 (+2)	42 kDa		50	1	1	1	4.35	0.000468
979	TRUE	Transport and Golgi organization 9 CG10007-PA [Drosophila melanogaster]	gi|21356787	43 kDa		50	1	1	1	3.67	0.000468
327	TRUE	Trehalase CG9364-PD, isoform D [Drosophila melanogaster]	gi|17933716 (+5)	64 kDa		50	1	1	1	2.68	0.000468
704	TRUE	Tropomyosin 1 CG4898-PL, isoform L [Drosophila melanogaster]	gi|45553375	32 kDa	FALSE	50	1	1	1	37.3	0.000468
412	TRUE	Troponin C at 41C CG2981-PA [Drosophila melanogaster]	gi|24585801	17 kDa		50	1	1	6	6.49	0.00281
984	TRUE	Ubiquitin conjugating enzyme 4 CG8284-PA [Drosophila melanogaster]	gi|24661830	23 kDa		99.2	1	1	3	7.54	0.0014
294	TRUE	Upf2 CG2253-PA [Drosophila melanogaster]	gi|24640488	140 kDa		98.3	1	1	1	0.806	0.000468
279	TRUE	upheld CG7107-PG, isoform G [Drosophila melanogaster]	gi|62473654	47 kDa	FALSE	98.6	1	1	1	40.7	0.000468
380	TRUE	Use1 CG14181-PA [Drosophila melanogaster]	gi|161082602	28 kDa		50	1	1	2	6.8	0.000936
82	TRUE	Vacuolar H[+] ATPase 14kD subunit CG8210-PA [Drosophila melanogaster]	gi|17136892	14 kDa		50	1	1	3	8.06	0.0014
298	TRUE	Vacuolar H[+] ATPase 16kD subunit CG3161-PA, isoform A [Drosophila melanogaster]	gi|17136612 (+3)	16 kDa		97.9	1	1	4	11.3	0.00187
554	TRUE	Vago CG2081-PB, isoform B [Drosophila melanogaster]	gi|24641178	18 kDa		50	1	1	1	12.5	0.000468
625	TRUE	vasa intronic gene CG4170-PA, isoform A [Drosophila melanogaster]	gi|17737419 (+3)	53 kDa		99.8	1	1	14	4.69	0.00655
733	TRUE	Vha100-2 CG18617-PB, isoform B [Drosophila melanogaster]	gi|21357019 (+1)	95 kDa		50	1	1	3	1.68	0.0014
371	TRUE	VhaM9.7-1 CG11589-PA [Drosophila melanogaster]	gi|21355921	10 kDa		50	1	1	4	9.52	0.00187
569	TRUE	VhaM9.7-2 CG7625-PA [Drosophila melanogaster]	gi|24668198	10 kDa		50	1	1	3	12.4	0.0014
193	TRUE	Vps20 CG4071-PA, isoform A [Drosophila melanogaster]	gi|24658229	24 kDa		50	1	1	1	5.19	0.000468
860	TRUE	Yolk protein 2 CG2979-PA [Drosophila melanogaster]	gi|161077703	50 kDa		50	1	1	2	3.17	0.000936
523	TRUE	Yolk protein 3 CG11129-PA [Drosophila melanogaster]	gi|24641865	46 kDa		50	1	1	2	2.38	0.000936
1162	TRUE	ypsilon schachtel CG5654-PA [Drosophila melanogaster]	gi|24663131	38 kDa		98	1	1	2	6.53	0.000936
595	TRUE	Z4 CG7752-PA [Drosophila melanogaster]	gi|24667974	105 kDa		98	1	1	2	1.91	0.000936

## Sheet: Peptide Report
Drosophila Dec 09_Condensed, Peptide report created on 01/07/2010
Experiment: Drosophila Dec 09_Condensed
	Database Set:
		Database Name: D:\Databases\drosophila\drosophila_refseq_092408.fasta
			Version: Custom: All D. melanogaster Refseq entries as of 092408
			Taxonomy: Drosophila melanogaster
			Number of Proteins: 20735
	Search Engine Set: 2 Search Engines
		Search Engine: Mascot
			Version: Mascot
			Samples: All Samples
			Fragment Tolerance: 0.80 Da (Monoisotopic)
			Parent Tolerance: 1.5 Da (Monoisotopic)
			Fixed Modifications: +57 on C (Carbamidomethyl)
			Variable Modifications: +16 on M (Oxidation)
			Database: Drosophila_20080924.fasta (custom version, 20735 entries)
			Digestion Enzyme: Trypsin
			Max Missed Cleavages: 3
		Search Engine: X! Tandem
			Version: 2007.01.01.1
			Samples: All Samples
			Fragment Tolerance: 0.80 Da (Monoisotopic)
			Parent Tolerance: 1.5 Da (Monoisotopic)
			Fixed Modifications: +57 on C (Carbamidomethyl)
			Variable Modifications: +16 on M (Oxidation)
			Database: D:\Databases\drosophila\drosophila_refseq_092408.fasta (custom version, 20735 entries)
			Digestion Enzyme: Trypsin
			Max Missed Cleavages: 2
	Scaffold Version: Scaffold_2_05_02
		Peptide Thresholds: 90.0% minimum
		Protein Thresholds: 50.0% minimum and 1 peptide minimum
Protein name	Accession Numbers	Molecular Weight (Da)	Identification Probability	Unique Peptides	Unique Spectra	Total Spectra	% of total spectra	Sequence Coverage	Peptide Sequence	Prev. amino acid	Next amino acid	Peptide Probability	Best Mascot Score	Mascot Identity score	Identified +1H Spectra	Identified +2H Spectra	Identified +3H Spectra	Identified +4H Spectra	Enzymatic Termini	Calc +1H Peptide Mass (AMU)	Peptide start	Peptide stop	Assigned	Other Proteins
CG12140 CG12140-PA [Drosophila melanogaster]	gi|24652256	65970.5	1	10	12	51	0.000239	0.22	ITTHYTLNPR	R	E	0.895	30.5	37.1	0	0	0	1	2	1215.65	31	40	TRUE
CG4389 CG4389-PB, isoform B [Drosophila melanogaster]	gi|24583077,gi|24583079	79622	1	27	31	210	0.000983	0.423	VVNGVLVIK	K	I	0.896	31.1	36.3	0	0	1	0	2	940.62	17	25	TRUE
stress-sensitive B CG16944-PA, isoform A [Drosophila melanogaster]	gi|18079273,gi|24641095	32892.2	1	18	26	349	0.00163	0.505	NTQFWR	K	Y	0.896	30.5	35.7	0	0	1	0	2	851.416	108	113	TRUE
Stretchin-Mlck CG18255-PA, isoform A [Drosophila melanogaster]	gi|24653966	1.03675e+06	1	7	7	9	4.21e-05	0.00831	ENMLSR	K	Q	0.896	30.9	36	0	0	1	0	2	765.356	7890	7895	TRUE
short stop CG18076-PH, isoform H [Drosophila melanogaster]	gi|24653497	989546	1	5	5	5	2.34e-05	0.00863	FSGDELALYQQR	K	L	0.896	31.6	36.7	0	0	1	0	2	1426.7	654	665	TRUE
CG6178 CG6178-PA [Drosophila melanogaster]	gi|21355181	59922.9	1	4	5	15	7.02e-05	0.114	GGVIFVDEIPKNPSGK	R	I	0.896	31.6	36.7	0	0	1	0	2	1656.9	512	527	TRUE
coro CG9446-PA, isoform A [Drosophila melanogaster]	gi|24586098,gi|24586100,gi|45552461	57250.9	1	3	3	3	1.4e-05	0.0795	VWQIPDGGLSR	K	T	0.896	31.6	36.7	0	0	1	0	2	1227.65	108	118	TRUE
Vacuolar H[+]-ATPase SFD subunit CG17332-PA, isoform A [Drosophila melanogaster]	gi|24584671,gi|24584673,gi|24584675	50711	1	3	3	6	2.81e-05	0.0816	NLIEKPEDSSVAK	R	D	0.896	31.6	36.7	0	0	1	0	2	1429.75	270	282	TRUE
Upf2 CG2253-PA [Drosophila melanogaster]	gi|24640488	140044	0.983	1	1	1	4.68e-06	0.00806	MGNALMELGR	K	Q	0.896	31	36.2	0	0	1	0	2	1107.53	479	488	TRUE
CG5793 CG5793-PA [Drosophila melanogaster]	gi|28571789	24585.8	1	4	4	14	6.55e-05	0.211	LTFQVEAE	K	-	0.897	29	36.5	0	1	0	0	2	936.468	221	228	TRUE
CG2076 CG2076-PA [Drosophila melanogaster]	gi|24641180	35800.7	1	3	3	13	6.08e-05	0.0938	LLELASR	R	G	0.897	32.7	37.8	0	0	1	0	2	801.484	148	154	TRUE
zormin CG33484-PD, isoform D [Drosophila melanogaster]	gi|116007762	411353	1	35	37	226	0.00106	0.131	NLQSLPGPMDEFVQK	R	A	0.898	31.6	36.6	0	0	1	0	2	1702.85	165	179	TRUE
Kinesin heavy chain CG7765-PA [Drosophila melanogaster]	gi|17136240	110383	1	4	4	4	1.87e-05	0.0605	ILQESLGGNAR	R	T	0.898	31.9	36.9	0	0	1	0	2	1157.63	293	303	TRUE
CG6512 CG6512-PB, isoform B [Drosophila melanogaster]	gi|24665814,gi|28574878	89684.8	0.998	2	2	3	1.4e-05	0.0436	ITDIAYSQVVR	K	F	0.899	31.5	36.6	0	0	1	0	2	1264.69	671	681	TRUE
Translocation protein 1 CG4758-PA, isoform A [Drosophila melanogaster]	gi|17136944,gi|24583206	48560.1	0.995	2	2	4	1.87e-05	0.0678	FTEGSNPLFTTR	K	E	0.899	31.5	36.5	0	0	1	0	2	1369.68	82	93	TRUE
FK506-binding protein 1 CG6226-PA [Drosophila melanogaster]	gi|24647110	39326.1	0.956	1	1	1	4.68e-06	0.0196	YSQTIIK	K	S	0.899	30.6	35.7	0	0	1	0	2	852.483	15	21	TRUE
Myosin light chain 2 CG2184-PA, isoform A [Drosophila melanogaster]	gi|17933672	23697.5	1	11	15	196	0.000917	0.518	GEEEEEEAA	K	-	0.9	29.6	36.9	0	1	0	0	2	992.37	214	222	TRUE
Glutathione S transferase S1 CG8938-PA, isoform A [Drosophila melanogaster]	gi|24654347,gi|24654349,gi|24654351	27595.7	1	5	6	13	6.08e-05	0.193	DLLEPYPALR	R	G	0.9	32.2	37.1	0	0	1	0	2	1186.65	216	225	TRUE
bellwether CG3612-PA [Drosophila melanogaster]	gi|24658560	59405.3	1	27	35	476	0.00223	0.411	RTGAIVDVPVGDELLGR	K	V	0.901	30	36.4	0	0	0	1	2	1766.98	132	148	TRUE
CG9140 CG9140-PA [Drosophila melanogaster]	gi|19920794	51813.7	1	8	8	22	0.000103	0.179	LISFYK	R	H	0.901	30.9	35.8	0	0	1	0	2	770.445	385	390	TRUE
Mitochondrial carrier homolog 1 CG6851-PA, isoform A [Drosophila melanogaster]	gi|17737513,gi|24654548,gi|24654552	34994.7	1	3	3	6	2.81e-05	0.149	LVGSLVAMVVSDR	K	V	0.901	31.7	36.6	0	0	1	0	2	1361.75	91	103	TRUE
CG10373 CG10373-PA [Drosophila melanogaster]	gi|24585024	22822.7	0.995	2	2	3	1.4e-05	0.106	NFIASR	K	L	0.901	31.6	36.5	0	0	1	0	2	707.384	107	112	TRUE
hu li tai shao CG9325-PA, isoform A [Drosophila melanogaster]	gi|17136738,gi|24655667,gi|24655672,gi|24655677,gi|24655685	73673.9	1	7	7	30	0.00014	0.154	KFAAVAAAEDGAATAEK	K	D	0.902	31.5	36.4	0	0	1	0	2	1620.82	337	353	TRUE
cyclope CG14028-PA [Drosophila melanogaster]	gi|24581914	8277.9	1	5	5	35	0.000164	0.506	ILVNDPK	K	K	0.902	30.6	35.5	0	0	1	0	2	798.473	42	48	TRUE
Nop56 CG13849-PA [Drosophila melanogaster]	gi|28572126	54821.6	0.999	2	2	2	9.36e-06	0.0565	YPASTVQILGAEK	K	A	0.902	31.8	36.7	0	0	1	0	2	1376.74	322	334	TRUE
terribly reduced optic lobes CG33950-PF, isoform F [Drosophila melanogaster]	gi|78706474	513388	1	89	107	871	0.00408	0.237	DPEGGIYLGLCRPCECNGHSK	R	Y	0.903	0	0	2.07	0	0	1	2	2419.06	2450	2470	TRUE	gi|161077537
alpha Spectrin CG1977-PA [Drosophila melanogaster]	gi|17136504	278289	1	40	44	127	0.000594	0.207	AIISADELAK	K	D	0.903	32.5	37.4	0	0	1	0	2	1030.58	385	394	TRUE
CG11963 CG11963-PB, isoform B [Drosophila melanogaster]	gi|161078106,gi|24645208	54791.9	1	12	12	179	0.000837	0.259	LAREMKMDVNFEIPDAQK	K	G	0.903	30	36.2	0	0	0	1	2	2135.06	434	451	TRUE
fau CG6544-PA, isoform A [Drosophila melanogaster]	gi|45550732	68623.5	1	9	11	44	0.000206	0.197	YVDAELDPNRPSR	K	K	0.903	30.2	36.5	0	0	0	1	2	1531.75	278	290	TRUE
CG4882 CG4882-PA [Drosophila melanogaster]	gi|17137576	45690.3	0.995	2	2	2	9.36e-06	0.0739	EASLVPLIPSVLVK	K	Q	0.903	31.5	36.4	0	0	1	0	2	1464.9	72	85	TRUE
cheerio CG3937-PD, isoform D [Drosophila melanogaster]	gi|45553391,gi|62484180	239160	0.988	1	1	1	4.68e-06	0.00317	ITGEGRK	K	R	0.903	33.1	37.9	0	0	1	0	2	760.432	1515	1521	TRUE
terribly reduced optic lobes CG33950-PG, isoform G [Drosophila melanogaster]	gi|161077537	459070	0.5	1	1	4	1.87e-05	0.256	DPEGGIYLGLCRPCECNGHSK	R	Y	0.903	0	0	2.07	0	0	1	2	2419.06	1977	1997	FALSE	gi|78706474
CG32702 CG32702-PA [Drosophila melanogaster]	gi|24640838	411066	1	55	57	276	0.00129	0.175	HLISETNK	K	I	0.904	31.4	36.3	0	0	1	0	2	941.506	2417	2424	TRUE
cathD CG1548-PA [Drosophila melanogaster]	gi|21355083	42456.3	1	8	9	32	0.00015	0.293	TFELEGK	K	D	0.904	31.2	36	0	0	2	0	2	823.42	328	334	TRUE
Ribosomal protein L13A CG1475-PB [Drosophila melanogaster]	gi|21357053	23629.6	1	3	3	7	3.28e-05	0.117	YCQVGR	K	L	0.904	30.3	35.1	0	0	1	0	2	782.362	137	142	TRUE
bent CG32019-PA, isoform A [Drosophila melanogaster]	gi|28558739,gi|45552153	999778	1	118	128	787	0.00368	0.192	IIDPQAASPPLIVKPLR	K	D	0.905	30.3	36.5	0	0	0	1	2	1828.11	7636	7652	TRUE
Retinoid- and fatty-acid binding protein CG11064-PA [Drosophila melanogaster]	gi|24638795	372668	1	8	8	17	7.95e-05	0.0334	LDGYELEAR	K	A	0.905	31.3	36.1	0	0	1	0	2	1065.52	1940	1948	TRUE
AP-50 CG7057-PA, isoform A [Drosophila melanogaster]	gi|24649014,gi|28571823	49838.9	1	7	7	18	8.42e-05	0.22	SATKEEQMQITSQVTGQIGWRREGIK	K	Y	0.905	29.4	35.6	0	0	0	1	2	2961.52	140	165	TRUE
Nipped-A CG33554-PA, isoform A [Drosophila melanogaster]	gi|161076329	436488	0.987	1	1	1	4.68e-06	0.00526	RNRSTGVGDFSFDTHEMIHR	R	L	0.905	29.9	36.1	0	0	0	1	2	2378.11	131	150	TRUE
sallimus CG1915-PC, isoform C [Drosophila melanogaster]	gi|161080703	2.06604e+06	1	83	86	363	0.0017	0.0614	ADDSAIYTCK	R	A	0.906	32.4	37.2	0	0	1	0	2	1143.5	2689	2698	TRUE
CG9090 CG9090-PA [Drosophila melanogaster]	gi|24656137	40535.9	1	13	16	119	0.000557	0.299	FACFER	K	T	0.906	32.7	37.5	0	0	1	0	2	829.367	245	250	TRUE	gi|24664195,gi|24664191
CG7920 CG7920-PA, isoform A [Drosophila melanogaster]	gi|21358615	51836.5	1	10	12	100	0.000468	0.262	AALLNSK	R	L	0.906	31.4	38.4	0	1	0	0	2	716.431	182	188	TRUE
Receptor of activated protein kinase C 1 CG7111-PA [Drosophila melanogaster]	gi|17137396	35600.2	1	9	13	29	0.000136	0.28	DEDTNYGYPQK	R	R	0.906	32.2	37	0	0	1	0	2	1329.56	48	58	TRUE
CG7430 CG7430-PA [Drosophila melanogaster]	gi|21358499	53066.3	1	9	11	34	0.000159	0.246	ALTGGIAMLFK	K	K	0.906	31.2	36	0	0	1	0	2	1137.63	129	139	TRUE
Mitochondrial phosphate carrier protein CG4994-PA, isoform A [Drosophila melanogaster]	gi|24664191,gi|24664195	38832.9	1	8	12	46	0.000215	0.32	FACFER	K	T	0.906	32.7	37.5	0	0	1	0	2	829.367	232	237	FALSE	gi|24656137
Ribosomal protein S17 CG3922-PB [Drosophila melanogaster]	gi|17647889	15267.2	1	4	4	11	5.15e-05	0.359	IAGYVTHLMGR	K	L	0.906	32.1	36.8	0	0	1	0	2	1233.64	50	60	TRUE
Iron regulatory protein 1B CG6342-PA [Drosophila melanogaster]	gi|24645686	98563.1	0.995	2	2	2	9.36e-06	0.0256	YREEGTPLVLVVGK	R	D	0.906	31.9	36.7	0	0	1	0	2	1559.88	769	782	TRUE
Ribosomal protein S3A CG2168-PA, isoform A [Drosophila melanogaster]	gi|17864162	30322.5	1	7	8	33	0.000154	0.276	IASDYLK	R	G	0.907	31.5	36.2	0	0	1	0	2	809.441	57	63	TRUE
Spase 25-subunit CG1751-PA [Drosophila melanogaster]	gi|24641313	22199	1	5	5	8	3.74e-05	0.221	LWEASSDMR	R	K	0.907	31.3	36	0	0	1	0	2	1110.49	123	131	TRUE
Rho1 CG8416-PA, isoform A [Drosophila melanogaster]	gi|17137100,gi|19549710,gi|19549712,gi|24654021,gi|45552649,gi|45552651,gi|45552653	21705.5	1	4	4	6	2.81e-05	0.167	QEPVKPQEGR	K	A	0.907	31.3	36.1	0	0	1	0	2	1167.61	136	145	TRUE
CG6415 CG6415-PA [Drosophila melanogaster]	gi|20129441	43403.3	1	4	4	10	4.68e-05	0.126	DFPGADVILGQLKEGVSRR	R	R	0.907	30.1	36.2	0	0	0	1	2	2057.11	299	317	TRUE
CG8728 CG8728-PA [Drosophila melanogaster]	gi|19921772	61032.7	1	3	3	4	1.87e-05	0.0737	LRHTWR	K	T	0.907	30.7	35.4	0	0	1	0	2	868.491	13	18	TRUE
Mitochondrial phosphate carrier protein CG4994-PA, isoform A [Drosophila melanogaster]	gi|24664191,gi|24664195	38832.9	1	8	12	46	0.000215	0.32	YAEIIGEENAYLYR	K	T	0.908	31.9	36.6	0	0	1	0	2	1703.83	145	158	TRUE
Ribosomal protein L26 CG6846-PA [Drosophila melanogaster]	gi|21357853	17263.4	1	7	8	18	8.42e-05	0.409	VVQAYR	K	K	0.908	32.2	36.9	0	0	1	0	2	735.415	70	75	TRUE
Neuroglian CG1634-PA, isoform A [Drosophila melanogaster]	gi|17530861,gi|24640619,gi|45554534	138346	1	5	5	11	5.15e-05	0.0638	IGASPPSAHSDSCTTQPDVPFK	K	N	0.908	30	36.1	0	0	0	1	2	2299.07	694	715	TRUE
icarus CG9031-PA [Drosophila melanogaster]	gi|45550188	31833.8	1	5	5	15	7.02e-05	0.159	LINLPR	R	G	0.908	29.9	34.6	0	0	1	0	2	725.467	108	113	TRUE
CG11779 CG11779-PA, isoform A [Drosophila melanogaster]	gi|24648138,gi|24648140,gi|78706780,gi|78706782	49360.1	1	4	4	4	1.87e-05	0.105	VKYDESENPVIR	K	A	0.908	31.8	36.4	0	0	1	0	2	1448.74	270	281	TRUE
Ribosomal protein L23 CG3661-PA [Drosophila melanogaster]	gi|17647883	14918.8	1	3	3	10	4.68e-05	0.257	ECADLWPR	K	I	0.908	32.6	37.2	0	0	1	0	2	1046.47	124	131	TRUE
Prosap CG30483-PA [Drosophila melanogaster]	gi|24653538	195882	0.998	2	2	2	9.36e-06	0.0103	DGWLLVR	R	I	0.908	32.3	37	0	0	1	0	2	858.484	17	23	TRUE
CG2736 CG2736-PA [Drosophila melanogaster]	gi|19922958	58158.8	0.995	2	2	4	1.87e-05	0.0552	KLCGDLGTVTALETK	R	F	0.908	31.7	36.3	0	0	1	0	2	1605.85	480	494	TRUE
CG6310 CG6310-PA [Drosophila melanogaster]	gi|28574933	22395.2	0.964	1	1	1	4.68e-06	0.0415	YQIEGIIK	K	Q	0.908	32.2	36.9	0	0	1	0	2	963.552	35	42	TRUE
terribly reduced optic lobes CG33950-PF, isoform F [Drosophila melanogaster]	gi|78706474	513388	1	89	107	871	0.00408	0.237	KSQVVPSVANTYSVEIK	R	E	0.909	30.2	36.2	0	0	0	1	2	1849.01	2347	2363	TRUE	gi|161077537
upheld CG7107-PF, isoform F [Drosophila melanogaster]	gi|62473664	47113.5	1	17	23	236	0.0011	0.405	ISLSFR	K	I	0.909	31.2	35.8	0	0	1	0	2	722.42	174	179	TRUE	gi|62473654,gi|24641813
Succinyl coenzyme A synthetase alpha subunit CG1065-PA [Drosophila melanogaster]	gi|28574296	34371.2	1	9	9	99	0.000463	0.314	KGGTQHLGLPVFASVAEAK	K	K	0.909	0	0	2.1	0	0	1	2	1910.05	72	90	TRUE
Trap1 CG3152-PA [Drosophila melanogaster]	gi|24586016	77947.8	1	6	6	10	4.68e-05	0.142	VLAESSPYYESLK	R	K	0.909	32	36.6	0	0	1	0	2	1485.75	495	507	TRUE
CG3624 CG3624-PA [Drosophila melanogaster]	gi|19922742	20449.3	1	4	4	19	8.89e-05	0.204	VLPSGSVVNTK	K	V	0.909	32.6	37.3	0	0	1	0	2	1100.63	141	151	TRUE
CG9342 CG9342-PA [Drosophila melanogaster]	gi|24585552	98761.1	1	3	3	5	2.34e-05	0.0429	QSGLDVEDPLLK	R	E	0.909	32.3	36.9	0	0	1	0	2	1313.7	428	439	TRUE
lethal (2) 01289 CG9432-PA, isoform A [Drosophila melanogaster]	gi|24586060	97403.2	1	3	3	4	1.87e-05	0.144	GQDNDDQSQEVEK	K	V	0.909	31.9	36.5	0	0	1	0	2	1491.62	816	828	TRUE
upheld CG7107-PA, isoform A [Drosophila melanogaster]	gi|24641813	47430.7	0.998	2	2	17	7.95e-05	0.408	ISLSFR	K	I	0.909	31.2	35.8	0	0	1	0	2	722.42	178	183	FALSE	gi|62473654,gi|62473664
upheld CG7107-PG, isoform G [Drosophila melanogaster]	gi|62473654	47331.6	0.986	1	1	1	4.68e-06	0.407	ISLSFR	K	I	0.909	31.2	35.8	0	0	1	0	2	722.42	177	182	FALSE	gi|24641813,gi|62473664
terribly reduced optic lobes CG33950-PG, isoform G [Drosophila melanogaster]	gi|161077537	459070	0.5	1	1	4	1.87e-05	0.256	KSQVVPSVANTYSVEIK	R	E	0.909	30.2	36.2	0	0	0	1	2	1849.01	1874	1890	FALSE	gi|78706474
Muscle-specific protein 300 CG33715-PD, isoform D [Drosophila melanogaster]	gi|161076705	1.40526e+06	1	45	45	109	0.00051	0.0478	IAVNVQQVSSR	R	F	0.91	32.2	36.8	0	0	1	0	2	1200.67	4467	4477	TRUE
CG3523 CG3523-PA [Drosophila melanogaster]	gi|19920632	266429	1	22	22	105	0.000491	0.121	LNAEGVFAK	K	A	0.91	32.4	37	0	0	1	0	2	948.515	703	711	TRUE
viking CG16858-PA [Drosophila melanogaster]	gi|17137252	193761	1	18	19	190	0.000889	0.103	GFIFAR	R	H	0.91	30.1	34.7	0	0	2	0	2	710.399	1515	1520	TRUE
CG4769 CG4769-PA [Drosophila melanogaster]	gi|24658292	33747	1	8	10	37	0.000173	0.287	IVFVPK	K	E	0.91	34	38.5	0	0	1	0	2	702.456	300	305	TRUE
CG17374 CG17374-PA [Drosophila melanogaster]	gi|62862516	254521	1	6	6	17	7.95e-05	0.0324	NTSFELMVHR	R	E	0.91	32.1	36.7	0	0	1	0	2	1249.6	1495	1504	TRUE
Glutathione S transferase S1 CG8938-PA, isoform A [Drosophila melanogaster]	gi|24654347,gi|24654349,gi|24654351	27595.7	1	5	6	13	6.08e-05	0.193	DNDGHLALGK	K	L	0.91	31.3	35.9	0	0	1	0	2	1039.52	185	194	TRUE
CG5590 CG5590-PA [Drosophila melanogaster]	gi|21357673	44337.7	1	5	6	55	0.000257	0.15	TAEPHPKLPGTIYSAAEEIEK	K	A	0.91	30.1	36	0	0	0	1	2	2281.17	42	62	TRUE
Annexin B11 CG9968-PA, isoform A [Drosophila melanogaster]	gi|17736989,gi|24642523	56197.3	1	4	4	7	3.28e-05	0.0939	SEIDMTDIK	R	V	0.91	31.9	36.4	0	0	1	0	2	1051.5	466	474	TRUE
mitochondrial ribosomal protein S10 CG4247-PC, isoform C [Drosophila melanogaster]	gi|161078308,gi|24647027,gi|28571716	18741.9	1	3	3	4	1.87e-05	0.178	LEIELR	K	G	0.91	33	37.6	0	0	1	0	2	772.457	46	51	TRUE
CG9297 CG9297-PA, isoform A [Drosophila melanogaster]	gi|28571703,gi|28571705	106076	1	10	11	40	0.000187	0.148	LNPLYEFK	R	K	0.911	31.3	35.9	0	0	1	0	2	1023.55	884	891	TRUE
TpnC25D CG6514-PA [Drosophila melanogaster]	gi|24581885	16778.8	1	3	4	16	7.49e-05	0.195	EGNGYITTSTLK	R	E	0.911	32.2	36.7	0	0	1	0	2	1283.65	96	107	TRUE
virus-induced RNA 1 CG31764-PA, isoform A [Drosophila melanogaster]	gi|24583894,gi|24583896,gi|45552331	48580.1	0.996	2	2	2	9.36e-06	0.0789	KFEEFDEEDDDDRREPLEK	K	Q	0.911	0	0	2.11	0	0	1	2	2441.07	201	219	TRUE
BRWD3 CG31132-PA [Drosophila melanogaster]	gi|24649631	248645	0.999	2	2	2	9.36e-06	0.00806	AGRNQKRPR	R	Y	0.911	30	35.9	0	0	0	1	2	1082.63	2145	2153	TRUE
CG17280 CG17280-PA [Drosophila melanogaster]	gi|20130301	12464.2	0.99	1	1	2	9.36e-06	0.0734	FPWGEGQK	R	S	0.911	32.5	37	0	0	2	0	2	948.458	85	92	TRUE
DNA-polymerase-delta CG5949-PA [Drosophila melanogaster]	gi|24664937	124890	0.962	1	1	1	4.68e-06	0.011	TSCLGCKSLMPK	K	G	0.911	30.7	36.6	0	0	0	1	2	1397.66	995	1006	TRUE
Laminin B1 CG7123-PA, isoform A [Drosophila melanogaster]	gi|17136294,gi|24582614	198314	1	23	25	131	0.000613	0.163	LIEDYR	K	A	0.912	31.7	36.2	0	0	1	0	2	808.421	1383	1388	TRUE
Glutamine synthetase 1 CG2718-PB, isoform B [Drosophila melanogaster]	gi|17136208,gi|24580558	44378.7	1	7	8	32	0.00015	0.233	AIEEAIEK	K	L	0.912	33.2	37.7	0	0	1	0	2	902.484	305	312	TRUE
Ribosomal protein L12 CG3195-PA, isoform A [Drosophila melanogaster]	gi|17864452,gi|24762533,gi|24762535	17656.1	1	5	5	42	0.000197	0.327	ALKEPPR	K	D	0.912	31	35.5	0	0	1	0	2	810.484	84	90	TRUE
Hemomucin CG3373-PA [Drosophila melanogaster]	gi|17137194	63399.1	1	5	5	26	0.000122	0.112	VYGPECLIAR	R	N	0.912	32.3	36.8	0	0	1	0	2	1177.6	67	76	TRUE
CG10672 CG10672-PA [Drosophila melanogaster]	gi|21355319	33600.2	1	4	4	22	0.000103	0.142	EALPLLR	K	Q	0.912	31	35.5	0	0	1	0	2	811.504	190	196	TRUE
CG4302 CG4302-PA [Drosophila melanogaster]	gi|19922680	60084.6	1	4	4	16	7.49e-05	0.103	VQSWLPQGDILAHPNVK	K	V	0.912	32	36.5	0	0	1	0	2	1902.02	355	371	TRUE
mitochondrial ribosomal protein S18A CG31450-PA [Drosophila melanogaster]	gi|24645087	17810.3	0.996	2	2	2	9.36e-06	0.135	MGTLVTMAQK	K	A	0.912	31.9	36.4	0	0	1	0	2	1079.56	110	119	TRUE
Isocitrate dehydrogenase CG7176-PC, isoform C [Drosophila melanogaster]	gi|21356561,gi|24660849,gi|24660856,gi|24660860,gi|24660864,gi|24660868,gi|28574947	52572.9	1	14	15	35	0.000164	0.313	LDNNEPLK	K	Q	0.913	32.3	36.8	0	0	1	0	2	942.49	397	404	TRUE
Ribosomal protein S7 CG1883-PA, isoform A [Drosophila melanogaster]	gi|21358459,gi|24651337,gi|45553763	22152.8	1	5	6	25	0.000117	0.289	VDTFTSVYK	K	K	0.913	30.7	37.2	0	1	0	0	2	1059.54	168	176	TRUE
Tudor-SN CG7008-PA [Drosophila melanogaster]	gi|20130403	103083	1	4	4	7	3.28e-05	0.0648	YGDITQDDAPEFR	K	-	0.913	31.9	36.4	0	0	1	0	2	1526.68	914	926	TRUE
CG4115 CG4115-PA [Drosophila melanogaster]	gi|24646246	25313.7	1	3	3	5	2.34e-05	0.186	NQGDWSPTGGIGLPQPDNR	R	E	0.913	31.8	36.3	0	0	1	0	2	2008.95	145	163	TRUE
CG5044 CG5044-PA, isoform A [Drosophila melanogaster]	gi|28571729,gi|28571730	42859.2	0.996	2	2	2	9.36e-06	0.0596	KLPDTEELKL	R	-	0.913	32.4	36.9	0	0	1	0	2	1185.67	377	386	TRUE
bent CG32019-PA, isoform A [Drosophila melanogaster]	gi|28558739,gi|45552153	999778	1	118	128	787	0.00368	0.192	AGPSEPSQPTDNHLCK	K	H	0.914	30.5	36.3	0	0	0	1	2	1737.79	2578	2593	TRUE
sallimus CG1915-PC, isoform C [Drosophila melanogaster]	gi|161080703	2.06604e+06	1	83	86	363	0.0017	0.0614	LQPINDPSMR	R	V	0.914	32.5	36.9	0	0	1	0	2	1170.59	3562	3571	TRUE
CG32702 CG32702-PA [Drosophila melanogaster]	gi|24640838	411066	1	55	57	276	0.00129	0.175	QCGNQLITIDR	R	S	0.914	32.4	36.8	0	0	1	0	2	1317.66	1955	1965	TRUE
Cytochrome P450-4g1 CG3972-PA [Drosophila melanogaster]	gi|17933498	62954.7	1	24	31	601	0.00281	0.39	VFAEQK	K	A	0.914	31.4	35.8	0	0	1	0	2	721.389	382	387	TRUE
Ribosomal protein LP0 CG7490-PA [Drosophila melanogaster]	gi|17737731	34185.8	1	9	9	43	0.000201	0.347	AQYFIK	K	V	0.914	31.4	35.8	0	0	1	0	2	769.425	11	16	TRUE
CG6370 CG6370-PA [Drosophila melanogaster]	gi|19922486	69214.1	1	6	6	19	8.89e-05	0.137	TTYVADLASLKPAR	K	G	0.914	32.2	36.6	0	0	1	0	2	1505.83	337	350	TRUE
CHOp24 CG3564-PA [Drosophila melanogaster]	gi|18921123	23245	1	3	4	8	3.74e-05	0.159	YTFVAPAK	K	G	0.914	31.1	35.5	0	0	2	0	2	896.488	84	91	TRUE
Rpn1 CG7762-PA [Drosophila melanogaster]	gi|21356859	102265	0.997	2	2	2	9.36e-06	0.0326	SGALLACGIVNCGIR	K	N	0.914	32.1	36.6	0	0	1	0	2	1560.8	438	452	TRUE
alpha Spectrin CG1977-PA [Drosophila melanogaster]	gi|17136504	278289	1	40	44	127	0.000594	0.207	LMDVSNLGVPEIEQR	K	L	0.915	32	36.4	0	0	1	0	2	1699.87	1778	1792	TRUE
Heat shock protein cognate 4 CG4264-PA, isoform A [Drosophila melanogaster]	gi|17737967,gi|24647034,gi|24647036,gi|24647038,gi|28571719,gi|28571721	71115.5	1	13	15	105	0.000491	0.304	IEVTYKDEK	K	K	0.915	31.5	35.8	0	0	1	0	2	1124.58	103	111	TRUE
Ribosomal protein L14 CG6253-PA [Drosophila melanogaster]	gi|17647881	19156.5	1	5	5	31	0.000145	0.277	FVQTGR	R	I	0.915	32.1	36.5	0	0	1	0	2	707.384	6	11	TRUE
REG CG1591-PA [Drosophila melanogaster]	gi|18860055	28104.3	0.996	2	2	2	9.36e-06	0.102	PNDTVVKVQEYK	M	D	0.915	32.2	36.5	0	0	1	0	2	1419.75	2	13	TRUE
CG15043 CG15043-PA [Drosophila melanogaster]	gi|24643050	17437.8	0.996	2	2	6	2.81e-05	0.129	YNMGAR	R	I	0.915	30.2	34.6	0	0	1	0	2	711.325	71	76	TRUE
Rpn1 CG7762-PA [Drosophila melanogaster]	gi|21356859	102265	0.997	2	2	2	9.36e-06	0.0326	AVPLALGLISASNPK	R	L	0.915	32.1	36.5	0	0	1	0	2	1450.86	700	714	TRUE
terribly reduced optic lobes CG33950-PF, isoform F [Drosophila melanogaster]	gi|78706474	513388	1	89	107	871	0.00408	0.237	VDGHADAQSTR	R	T	0.916	31.3	36.9	0	0	0	1	2	1156.53	2994	3004	TRUE	gi|161077537
pericardin CG5700-PB [Drosophila melanogaster]	gi|24663043	163475	1	14	18	215	0.00101	0.114	ALELHAPK	K	G	0.916	32.3	36.7	0	0	1	0	2	878.51	1614	1621	TRUE
alpha-Adaptin CG4260-PA, isoform A [Drosophila melanogaster]	gi|28574818,gi|45552169	106920	1	9	9	35	0.000164	0.0987	LGLFYGNK	R	T	0.916	31.3	35.7	0	0	1	0	2	911.499	751	758	TRUE
terribly reduced optic lobes CG33950-PG, isoform G [Drosophila melanogaster]	gi|161077537	459070	0.5	1	1	4	1.87e-05	0.256	VDGHADAQSTR	R	T	0.916	31.3	36.9	0	0	0	1	2	1156.53	2521	2531	FALSE	gi|78706474
Neural conserved at 73EF CG11661-PI, isoform I [Drosophila melanogaster]	gi|161084461	122879	1	19	20	218	0.00102	0.219	LSGQDVER	R	G	0.917	33.3	37.5	0	0	1	0	2	903.454	666	673	TRUE
fondue CG15825-PB, isoform B [Drosophila melanogaster]	gi|20129625	58012.6	1	7	9	86	0.000402	0.153	DLVTGESESVDINGKR	K	A	0.917	32	36.3	0	0	1	0	2	1718.86	539	554	TRUE
Kinesin heavy chain CG7765-PA [Drosophila melanogaster]	gi|17136240	110383	1	4	4	4	1.87e-05	0.0605	GKVEKLEIELAR	K	W	0.917	32.6	36.9	0	0	1	0	2	1384.82	364	375	TRUE
CG4685 CG4685-PA, isoform A [Drosophila melanogaster]	gi|21356737,gi|62472918,gi|62472926,gi|62472936	54956.5	1	2	2	3	1.4e-05	0.055	KANIILGGQPLPDK	K	G	0.917	32.2	36.5	0	0	1	0	2	1463.86	373	386	TRUE
CG16799 CG16799-PA [Drosophila melanogaster]	gi|45550471	20934.7	0.961	1	1	1	4.68e-06	0.0559	VLVENYNFDK	R	T	0.917	32	36.2	0	0	1	0	2	1240.62	51	60	TRUE
alpha actinin CG4376-PC, isoform C [Drosophila melanogaster]	gi|17137758	106358	1	31	34	241	0.00113	0.381	GLELAEK	K	A	0.918	33.7	37.9	0	0	1	0	2	759.425	395	401	TRUE
Tiggrin CG11527-PA [Drosophila melanogaster]	gi|17136984	257427	1	20	20	36	0.000168	0.107	YQGDMQSQTQWLR	K	G	0.918	32.3	36.5	0	0	1	0	2	1640.75	529	541	TRUE
CG5703 CG5703-PA [Drosophila melanogaster]	gi|18859877	26764.6	1	9	9	37	0.000173	0.388	GPGFGLQAGL	K	-	0.918	31.3	37.5	0	1	0	0	2	916.49	233	242	TRUE
Retinoid- and fatty-acid binding protein CG11064-PA [Drosophila melanogaster]	gi|24638795	372668	1	8	8	17	7.95e-05	0.0334	RQDFIDGTAEVK	K	L	0.918	32.5	36.7	0	0	1	0	2	1378.7	2369	2380	TRUE
inflated CG9623-PB, isoform B [Drosophila melanogaster]	gi|24642641	154306	1	7	8	16	7.49e-05	0.0623	NCGPDNICEPDLK	K	L	0.918	32.3	36.5	0	0	1	0	2	1531.65	660	672	TRUE
string of pearls CG5920-PA [Drosophila melanogaster]	gi|17136734	28882.7	1	6	6	30	0.00014	0.251	SLEEIYLYSLPIK	K	E	0.918	32.2	36.5	0	0	1	0	2	1567.86	60	72	TRUE
mitochondrial ribosomal protein L10 CG11488-PA [Drosophila melanogaster]	gi|17647667	28318.6	0.996	2	2	5	2.34e-05	0.0847	ATLIQR	M	S	0.918	33.9	38.1	0	0	1	0	2	701.431	2	7	TRUE
Na/Ca-exchange protein CG5685-PA, isoform A [Drosophila melanogaster]	gi|24648584,gi|24648586,gi|24648588	106132	0.96	1	1	1	4.68e-06	0.0168	AQLHAGDDEEADDPIR	K	M	0.918	32	36.3	0	0	1	0	2	1751.78	428	443	TRUE
CG31407 CG31407-PA [Drosophila melanogaster]	gi|24645576	17198	0.977	1	1	1	4.68e-06	0.0705	QNGALVLEVLK	R	V	0.918	13.6	36.3	1.4	0	0	1	2	1183.71	9	19	TRUE
RpS25 CG6684-PA, isoform A [Drosophila melanogaster]	gi|24645865,gi|24645867	13184	1	5	5	22	0.000103	0.342	QVVQHHSQVIYTR	K	A	0.919	0	0	2.17	0	0	1	2	1577.82	98	110	TRUE
CG1910 CG1910-PA, isoform A [Drosophila melanogaster]	gi|21356979,gi|24651731,gi|24651733,gi|24651735	45925.1	0.996	2	2	3	1.4e-05	0.0569	EPQEICEVK	K	K	0.919	33	37.2	0	0	2	0	2	1131.54	402	410	TRUE
CG3523 CG3523-PA [Drosophila melanogaster]	gi|19920632	266429	1	22	22	105	0.000491	0.121	QAECMDPLLR	K	M	0.92	32.7	36.9	0	0	1	0	2	1232.58	109	118	TRUE
CG11198 CG11198-PC, isoform C [Drosophila melanogaster]	gi|161076407,gi|161076409,gi|24586458,gi|24586460	287539	1	20	20	52	0.000243	0.105	VNPVNANDWENGFFDR	R	D	0.92	32.3	36.4	0	0	1	0	2	1893.85	2162	2177	TRUE
Phosphoribosylamidotransferase 2 CG10078-PB, isoform B [Drosophila melanogaster]	gi|24659598,gi|24659604	59462.2	1	4	4	5	2.34e-05	0.112	TVDIVERPDYK	R	R	0.92	31.2	36.6	0	0	0	1	2	1334.7	310	320	TRUE
Nascent polypeptide associated complex protein alpha subunit CG8759-PB, isoform B [Drosophila melanogaster]	gi|17137300,gi|19549608,gi|24653200	23003.2	1	3	3	10	4.68e-05	0.212	NPHSDTYIVFGEAK	K	I	0.92	32.1	36.3	0	0	1	0	2	1577.76	114	127	TRUE
CG5177 CG5177-PA [Drosophila melanogaster]	gi|20129309	31236.3	1	3	3	22	0.000103	0.13	VVCSGAWVEDK	K	K	0.92	32.3	36.5	0	0	1	0	2	1249.59	131	141	TRUE
Laminin B2 CG3322-PA [Drosophila melanogaster]	gi|17737557	182321	1	30	31	130	0.000608	0.241	DTYSLPDSR	R	A	0.921	31.8	35.9	0	0	1	0	2	1053.49	197	205	TRUE
CG4169 CG4169-PA [Drosophila melanogaster]	gi|24665395	45397.7	1	18	22	151	0.000706	0.577	IISRYSSDGGLIK	R	E	0.921	30.9	36.3	0	0	0	1	2	1408.78	368	380	TRUE
CG6782 CG6782-PE, isoform E [Drosophila melanogaster]	gi|78706744,gi|78706746,gi|78706748,gi|78706750	34076.3	1	10	10	28	0.000131	0.259	GLTPTILK	K	Q	0.921	33.3	37.4	0	0	2	0	2	842.535	191	198	TRUE
Tpi CG2171-PA, isoform A [Drosophila melanogaster]	gi|28572004	37921.7	1	7	7	22	0.000103	0.233	TNEVVAR	K	Q	0.921	33.8	37.9	0	0	1	0	2	788.427	239	245	TRUE
Rab-protein 7 CG5915-PA [Drosophila melanogaster]	gi|17865835	23313.1	1	5	5	9	4.21e-05	0.29	ATIGADFCTK	K	E	0.921	31.9	36	0	0	1	0	2	1083.51	39	48	TRUE
CG9090 CG9090-PA [Drosophila melanogaster]	gi|24656137	40535.9	1	13	16	119	0.000557	0.299	IQTTPGFAK	K	T	0.922	33.1	37.2	0	0	1	0	2	962.531	200	208	TRUE
Rtnl1 CG33113-PF, isoform F [Drosophila melanogaster]	gi|28574660	63921.1	1	8	8	56	0.000262	0.185	APTIAAPVVEPKPEPPKPK	K	V	0.922	32.2	36.3	0	0	1	0	2	1966.14	345	363	TRUE
Muscle-specific protein 300 CG33715-PD, isoform D [Drosophila melanogaster]	gi|161076705	1.40526e+06	1	45	45	109	0.00051	0.0478	EKREEQER	K	V	0.923	33.2	37.2	0	0	1	0	2	1103.54	623	630	TRUE
CG1516 CG1516-PE, isoform E [Drosophila melanogaster]	gi|19921944,gi|24652210,gi|24652212,gi|24652214,gi|24652216,gi|24652218,gi|24652220,gi|24652222,gi|24652224	132658	1	36	39	469	0.00219	0.342	AAFGNGAMFIEK	K	F	0.923	32.9	36.9	0	0	1	0	2	1271.61	228	239	TRUE
CG4389 CG4389-PB, isoform B [Drosophila melanogaster]	gi|24583077,gi|24583079	79622	1	27	31	210	0.000983	0.423	DLDQYTK	K	K	0.923	31.2	35.1	0	0	2	0	2	882.421	543	549	TRUE
beta Spectrin CG5870-PA [Drosophila melanogaster]	gi|17647191	265726	1	23	25	77	0.00036	0.138	QLLHVEHPNSDEILER	R	Q	0.923	0	0	2.19	0	2	1	2	1911.96	911	926	TRUE
Cytochrome P450 reductase CG11567-PA, isoform A [Drosophila melanogaster]	gi|17137192	76331.1	1	18	20	177	0.000828	0.321	GNMSEADAVQYIKKMEAQK	K	R	0.923	14.9	36.2	1.43	0	0	1	2	2141.04	653	671	TRUE
porin CG6647-PA, isoform A [Drosophila melanogaster]	gi|17136632,gi|19550069,gi|85724932	30532.8	1	12	17	129	0.000604	0.44	DYGLTLTEK	K	W	0.923	31.9	35.9	0	0	1	0	2	1039.53	65	73	TRUE
alpha-Adaptin CG4260-PA, isoform A [Drosophila melanogaster]	gi|28574818,gi|45552169	106920	1	9	9	35	0.000164	0.0987	VPENEIR	R	E	0.923	33	37	0	0	1	0	2	856.453	636	642	TRUE
CG30015 CG30015-PC, isoform C [Drosophila melanogaster]	gi|161076518	163251	0.989	1	1	1	4.68e-06	0.0106	ITSGNDVTNLLSKSSR	K	G	0.923	31	36.3	0	0	0	1	2	1691.89	754	769	TRUE
Ribosomal protein L35A CG2099-PA [Drosophila melanogaster]	gi|21356927	17637.8	0.988	1	1	1	4.68e-06	0.0637	NQHENQAILK	R	I	0.923	32.2	36.1	0	0	1	0	2	1194.62	65	74	TRUE
terribly reduced optic lobes CG33950-PF, isoform F [Drosophila melanogaster]	gi|78706474	513388	1	89	107	871	0.00408	0.237	GGHAELLINTAAR	R	L	0.924	31.2	36.5	0	0	0	1	2	1322.72	4237	4249	TRUE	gi|161077537
zormin CG33484-PD, isoform D [Drosophila melanogaster]	gi|116007762	411353	1	35	37	226	0.00106	0.131	QVGVGDAGR	K	Y	0.924	34	38	0	0	1	0	2	858.443	2190	2198	TRUE
midline fasciclin CG3359-PB, isoform B [Drosophila melanogaster]	gi|24646161,gi|24646163,gi|28573037,gi|28573039,gi|28573041,gi|28573043,gi|28573045,gi|28573047,gi|28573049,gi|28573051,gi|28573053,gi|28573055,gi|28573057,gi|28573059,gi|28573061	90614.6	1	11	11	29	0.000136	0.15	NADFTTPCEK	R	I	0.924	32.4	36.3	0	0	1	0	2	1182.51	200	209	TRUE
CG10924 CG10924-PA, isoform A [Drosophila melanogaster]	gi|24655082	70655.5	1	8	8	21	9.83e-05	0.154	GVTVTDWLGK	K	L	0.924	33.4	37.3	0	0	1	0	2	1075.58	398	407	TRUE
Multidrug-Resistance like Protein 1 CG6214-PB, isoform B [Drosophila melanogaster]	gi|24583969,gi|45550972,gi|45552335,gi|45552337,gi|45552339,gi|45552341,gi|45552343,gi|45552345,gi|45552347,gi|45552349,gi|45552351,gi|45552353,gi|45552355,gi|45552357,gi|45552359,gi|45552361,gi|45552363	173518	1	3	3	3	1.4e-05	0.0284	INLDPFEIK	R	T	0.924	33.5	37.5	0	0	1	0	2	1088.6	1402	1410	TRUE
Diphenol oxidase A2 CG10484-PA [Drosophila melanogaster]	gi|17137450	55988.4	0.996	2	2	2	9.36e-06	0.0445	LIDASDLK	K	R	0.924	34.1	38	0	0	1	0	2	874.489	136	143	TRUE
mitochondrial ribosomal protein L44 CG2109-PA [Drosophila melanogaster]	gi|21357105	36234.2	0.999	2	2	2	9.36e-06	0.0779	KLGEAEPR	R	L	0.924	32.4	36.4	0	0	1	0	2	899.495	242	249	TRUE
terribly reduced optic lobes CG33950-PG, isoform G [Drosophila melanogaster]	gi|161077537	459070	0.5	1	1	4	1.87e-05	0.256	GGHAELLINTAAR	R	L	0.924	31.2	36.5	0	0	0	1	2	1322.72	3764	3776	FALSE	gi|78706474
CG2807 CG2807-PA [Drosophila melanogaster]	gi|45550087	149625	0.978	1	1	1	4.68e-06	0.00597	KIVLKVVK	K	Q	0.924	32	36	0	0	1	0	2	926.677	822	829	TRUE
Ribosomal protein S3 CG6779-PA [Drosophila melanogaster]	gi|17136324	27453.7	1	15	16	63	0.000295	0.642	FNFETGR	R	I	0.925	33	36.9	0	0	1	0	2	870.411	79	85	TRUE
Cysteine proteinase-1 CG6692-PC, isoform C [Drosophila melanogaster]	gi|24653514,gi|24653516,gi|24653518	37952.4	1	8	8	104	0.000487	0.282	DNGGIDTEK	K	S	0.925	32.8	36.7	0	0	1	0	2	948.428	202	210	TRUE
CG3699 CG3699-PA [Drosophila melanogaster]	gi|23397609	26045.2	1	6	6	23	0.000108	0.299	VNSVNPGFVVTNIHR	R	N	0.925	32.4	36.3	0	0	1	0	2	1652.89	174	188	TRUE
cyclope CG14028-PA [Drosophila melanogaster]	gi|24581914	8277.9	1	5	5	35	0.000164	0.506	GLHNATIK	R	R	0.925	31.6	35.5	0	0	1	0	2	853.49	16	23	TRUE
Muscle protein 20 CG4696-PA, isoform A [Drosophila melanogaster]	gi|17136346,gi|62471709	20172.7	1	4	4	22	0.000103	0.223	DGQVLCK	K	L	0.925	33.6	37.5	0	0	1	0	2	819.404	47	53	TRUE
Rpn2 CG11888-PA [Drosophila melanogaster]	gi|24650984	113184	1	3	3	11	5.15e-05	0.0373	NEYTETIIAK	R	C	0.925	32.4	36.3	0	0	1	0	2	1181.61	95	104	TRUE
Ribosomal protein L30 CG10652-PA, isoform A [Drosophila melanogaster]	gi|17864264,gi|24585096	12216.9	1	5	5	29	0.000136	0.595	TEVQHYSGTNIELGTACGK	K	Y	0.926	17.3	36.3	1.46	0	0	1	2	2064.97	69	87	TRUE
Sac1 CG9128-PA [Drosophila melanogaster]	gi|19923034	67750	0.996	2	2	2	9.36e-06	0.0456	YDLTNSLQR	R	Q	0.926	32.2	36	0	0	1	0	2	1109.56	136	144	TRUE
Papilin CG33103-PA, isoform A [Drosophila melanogaster]	gi|28572036	312636	1	51	58	438	0.00205	0.228	DTCQDYTGK	K	H	0.927	33.5	37.3	0	0	1	0	2	1087.44	1660	1668	TRUE
CG13887 CG13887-PB, isoform B [Drosophila melanogaster]	gi|19923024,gi|24654889	26137.9	1	5	5	17	7.95e-05	0.193	AKEAGEDTTLIELNK	K	L	0.927	31.4	36.5	0	0	0	1	2	1631.85	157	171	TRUE
CG5599 CG5599-PA [Drosophila melanogaster]	gi|18859875	50055.5	1	3	3	13	6.08e-05	0.0844	NQLQLVAK	R	E	0.927	33	36.8	0	0	1	0	2	913.547	273	280	TRUE
CG32702 CG32702-PA [Drosophila melanogaster]	gi|24640838	411066	1	55	57	276	0.00129	0.175	SAAAQIIGR	R	Y	0.928	33.7	37.4	0	0	1	0	2	886.511	504	512	TRUE
CG4389 CG4389-PB, isoform B [Drosophila melanogaster]	gi|24583077,gi|24583079	79622	1	27	31	210	0.000983	0.423	LGLPEVMLGLLPGGGGTVR	K	L	0.928	32.6	36.4	0	0	1	0	2	1852.04	141	159	TRUE
CG10097 CG10097-PB, isoform B [Drosophila melanogaster]	gi|78706758	56986.7	1	11	14	80	0.000374	0.271	LITQLAK	R	E	0.928	34.2	37.9	0	0	1	0	2	786.509	134	140	TRUE
CG6782 CG6782-PE, isoform E [Drosophila melanogaster]	gi|78706744,gi|78706746,gi|78706748,gi|78706750	34076.3	1	10	10	28	0.000131	0.259	NEGPAAFYK	K	G	0.928	31.9	35.6	0	0	1	0	2	996.479	277	285	TRUE
growl CG14648-PB, isoform B [Drosophila melanogaster]	gi|161078016,gi|21355167	58944	1	7	7	22	0.000103	0.183	KLPEAGTDER	R	R	0.928	33.6	37.3	0	0	1	0	2	1115.57	354	363	TRUE
Mdh CG5889-PA [Drosophila melanogaster]	gi|21356279	68577.4	1	6	6	9	4.21e-05	0.105	FGLIYR	R	R	0.928	31.1	34.9	0	0	1	0	2	768.441	151	156	TRUE
Ribosomal protein S15Ab CG12324-PA [Drosophila melanogaster]	gi|24652557	14723.9	1	5	5	19	8.89e-05	0.323	FLTVMMK	K	H	0.928	33.8	37.6	0	0	1	0	2	901.453	37	43	TRUE	gi|24641750,gi|17975567,gi|24641743,gi|24641747
CG9603 CG9603-PA [Drosophila melanogaster]	gi|24645039	9883.7	1	4	4	11	5.15e-05	0.36	GYFEIR	K	K	0.928	31.7	35.5	0	0	1	0	2	784.399	31	36	TRUE
Kinesin heavy chain CG7765-PA [Drosophila melanogaster]	gi|17136240	110383	1	4	4	4	1.87e-05	0.0605	DLGEVGQAIAPGESSIDLK	R	M	0.928	32.6	36.4	0	0	1	0	2	1898.97	577	595	TRUE
CG15261 CG15261-PA [Drosophila melanogaster]	gi|19921376	14858.1	1	3	3	10	4.68e-05	0.326	LISTANAAKPVAPYNQAVVADR	K	T	0.928	0	0	2.23	0	0	1	2	2269.23	8	29	TRUE
Myosin alkali light chain 1 CG5596-PB, isoform B [Drosophila melanogaster]	gi|17136340	17506.4	1	3	3	40	0.000187	0.219	LMSDPVVFD	R	-	0.928	30.6	36.2	0	2	0	0	2	1022.49	147	155	TRUE
Rm62 CG10279-PA, isoform A [Drosophila melanogaster]	gi|24644479	78531.6	1	3	3	3	1.4e-05	0.0737	GSLSNGRGFGGGGGGGGEGRHSR	K	F	0.928	10.6	36.4	1.47	0	0	1	2	2072.97	695	717	TRUE
CG5167 CG5167-PA [Drosophila melanogaster]	gi|24646278	47233	1	3	3	6	2.81e-05	0.0905	GTSLISELEK	R	H	0.928	33.2	36.9	0	0	1	0	2	1076.58	409	418	TRUE
CG31352 CG31352-PA [Drosophila melanogaster]	gi|45550723	89581.2	1	2	2	3	1.4e-05	0.0323	LPSDVDR	R	C	0.928	34	37.8	0	0	1	0	2	801.411	759	765	TRUE
Ribosomal protein S15Aa CG2033-PD, isoform D [Drosophila melanogaster]	gi|17975567,gi|24641743,gi|24641747,gi|24641750	14753.8	0.5	1	1	3	1.4e-05	0.323	FLTVMMK	K	H	0.928	33.8	37.6	0	0	1	0	2	901.453	37	43	FALSE	gi|24652557
CG32092 CG32092-PB [Drosophila melanogaster]	gi|24662922	283041	1	18	19	88	0.000412	0.0809	DVEGQNLGR	K	Y	0.929	33.7	37.4	0	0	1	0	2	987.486	2126	2134	TRUE
CG32092 CG32092-PB [Drosophila melanogaster]	gi|24662922	283041	1	18	19	88	0.000412	0.0809	LFTDFK	R	K	0.929	32.2	35.8	0	0	1	0	2	770.409	806	811	TRUE
Multidrug-Resistance like Protein 1 CG6214-PB, isoform B [Drosophila melanogaster]	gi|24583969,gi|45550972,gi|45552335,gi|45552337,gi|45552339,gi|45552341,gi|45552343,gi|45552345,gi|45552347,gi|45552349,gi|45552351,gi|45552353,gi|45552355,gi|45552357,gi|45552359,gi|45552361,gi|45552363	173518	1	3	3	3	1.4e-05	0.0284	KESTVGEIVNLMAVDAQR	K	F	0.929	31.2	36.1	0	0	0	1	2	1976.01	425	442	TRUE
Fad2 CG7923-PA [Drosophila melanogaster]	gi|24662393	41082.6	0.999	2	2	4	1.87e-05	0.0704	EDVGVTTITHQR	K	N	0.929	33	36.7	0	0	1	0	2	1355.69	341	352	TRUE
CG30059 CG30059-PA [Drosophila melanogaster]	gi|19922168,gi|24653364	56181.2	0.996	2	2	4	1.87e-05	0.0549	YLNQYWGAGDVPK	K	G	0.929	32.7	36.4	0	0	1	0	2	1510.73	126	138	TRUE
pericardin CG5700-PB [Drosophila melanogaster]	gi|24663043	163475	1	14	18	215	0.00101	0.114	YQVVQK	K	Q	0.93	33	36.6	0	0	1	0	2	764.431	1574	1579	TRUE
PHGPx CG12013-PB, isoform B [Drosophila melanogaster]	gi|21356883,gi|24656767,gi|24656772,gi|24656777	26220.9	1	6	7	55	0.000257	0.277	QTGTLGSGIK	K	W	0.93	33.9	37.5	0	0	2	0	2	961.532	194	203	TRUE
Mdh CG5889-PA [Drosophila melanogaster]	gi|21356279	68577.4	1	6	6	9	4.21e-05	0.105	AECTAEDAYK	K	H	0.93	33.3	36.9	0	0	1	0	2	1157.48	453	462	TRUE
CG3214 CG3214-PA [Drosophila melanogaster]	gi|24581165	16806.2	1	5	5	13	6.08e-05	0.289	LFQMVR	K	E	0.93	31.9	35.5	0	0	1	0	2	809.434	13	18	TRUE
Fermitin 1 CG14991-PA, isoform A [Drosophila melanogaster]	gi|24657225,gi|24657230	80481.1	1	3	3	4	1.87e-05	0.0551	GCEVTPDVNLAQGK	K	F	0.93	33	36.7	0	0	1	0	2	1487.72	454	467	TRUE
mitochondrial ribosomal protein S18C CG9688-PA [Drosophila melanogaster]	gi|24651373	16170.3	0.997	2	2	2	9.36e-06	0.136	DLDFLQDPK	K	L	0.93	33.6	37.2	0	0	1	0	2	1090.54	119	127	TRUE
Laminin B1 CG7123-PA, isoform A [Drosophila melanogaster]	gi|17136294,gi|24582614	198314	1	23	25	131	0.000613	0.163	NQQLLR	K	L	0.931	33.2	36.8	0	0	2	0	2	771.448	1752	1757	TRUE
mitochondrial single stranded DNA-binding protein CG4337-PA, isoform A [Drosophila melanogaster]	gi|24647376,gi|85725234	16349.3	1	3	3	9	4.21e-05	0.219	DTVLEYLK	R	K	0.931	32.1	35.7	0	0	1	0	2	980.531	97	104	TRUE
Trap1 CG3152-PA [Drosophila melanogaster]	gi|24586016	77947.8	1	6	6	10	4.68e-05	0.142	EGIVTSSDASEKEEIAK	K	L	0.932	31.6	36.4	0	0	0	1	2	1792.88	438	454	TRUE
Histone H3.3B CG8989-PA, isoform A [Drosophila melanogaster]	gi|17530867,gi|17647507,gi|24585677,gi|24640743,gi|28571378,gi|78706960,gi|78706968,gi|78706978,gi|78706986,gi|78706996,gi|78707006,gi|78707016,gi|78707026,gi|78707036,gi|78707046,gi|78707056,gi|78707066,gi|78707076,gi|78707086,gi|78707096,gi|78707106,gi|78707116,gi|78707126,gi|78707136,gi|78707146,gi|78707156,gi|78707164	15370.7	1	3	3	7	3.28e-05	0.147	DIQLAR	K	R	0.932	32.8	37.9	0	1	0	0	2	715.41	124	129	TRUE
CG4589 CG4589-PB, isoform B [Drosophila melanogaster]	gi|19922902,gi|24762651,gi|24762654	113567	1	2	2	3	1.4e-05	0.0267	FDDEITLDSLSR	R	E	0.932	33.1	36.7	0	0	1	0	2	1410.68	340	351	TRUE
CG30359 CG30359-PA [Drosophila melanogaster]	gi|24586593	72318.7	0.997	2	2	2	9.36e-06	0.0524	TANWVLGNHDQPR	R	V	0.932	32.9	36.5	0	0	1	0	2	1507.74	371	383	TRUE
Casein kinase II alpha subunit CG17520-PB, isoform B [Drosophila melanogaster]	gi|17864602,gi|24668859,gi|24668866	39942.9	0.997	2	2	2	9.36e-06	0.0804	TPALIFEHVNNTDFK	R	Q	0.932	31.7	36.5	0	0	0	1	2	1745.89	106	120	TRUE
Cytochrome P450-4g1 CG3972-PA [Drosophila melanogaster]	gi|17933498	62954.7	1	24	31	601	0.00281	0.39	LDYDLK	R	L	0.933	32.2	35.6	0	0	2	0	2	766.399	430	435	TRUE
beta Spectrin CG5870-PA [Drosophila melanogaster]	gi|17647191	265726	1	23	25	77	0.00036	0.138	NYAEVIDALHK	K	Q	0.933	33.4	36.9	0	0	1	0	2	1272.66	792	802	TRUE
CG9342 CG9342-PA [Drosophila melanogaster]	gi|24585552	98761.1	1	3	3	5	2.34e-05	0.0429	ESVIQTVATLTR	R	Q	0.933	33.3	36.8	0	0	1	0	2	1317.74	416	427	TRUE
Helicase 89B CG4261-PA [Drosophila melanogaster]	gi|24647318	213770	0.985	1	1	2	9.36e-06	0.00518	EDVLKDLPPK	K	I	0.933	32.7	36.2	0	0	2	0	2	1153.65	1591	1600	TRUE
Glutamate dehydrogenase CG5320-PA, isoform A [Drosophila melanogaster]	gi|45549226	62520.3	1	18	19	156	0.00073	0.333	KGFIGPGVDVPAPDMGTGER	K	E	0.934	31.8	36.4	0	0	0	1	2	1999.99	203	222	TRUE
CG1640 CG1640-PA, isoform A [Drosophila melanogaster]	gi|24641760,gi|24641764,gi|24641766,gi|24641768,gi|24641770,gi|45551451	64030.1	1	8	8	25	0.000117	0.17	SILSMINAEVGCK	K	A	0.934	32.9	36.3	0	0	1	0	2	1437.71	246	258	TRUE
mitochondrial acyl carrier protein 1 CG9160-PA, isoform A [Drosophila melanogaster]	gi|17136934	17245.7	0.999	2	2	4	1.87e-05	0.125	LYDKIDPSK	K	L	0.934	31.9	36.6	0	0	0	1	2	1078.58	85	93	TRUE
BRWD3 CG31132-PA [Drosophila melanogaster]	gi|24649631	248645	0.999	2	2	2	9.36e-06	0.00806	QLLDLMWAR	R	T	0.934	32.5	37.2	0	0	0	1	2	1161.61	1382	1390	TRUE
flotillin CG8200-PA, isoform A [Drosophila melanogaster]	gi|17137546	47116.8	1	13	14	28	0.000131	0.364	IRGEAEAFAIAAKAK	R	A	0.935	32.1	36.7	0	0	0	1	2	1545.88	321	335	TRUE
CG9512 CG9512-PA [Drosophila melanogaster]	gi|18859993	68870.1	1	5	5	12	5.61e-05	0.0915	GYVAATGFNDR	K	V	0.935	33.5	36.9	0	0	1	0	2	1170.55	429	439	TRUE
Ribosomal protein L22 CG7434-PA [Drosophila melanogaster]	gi|17137152	30594.1	1	4	4	17	7.95e-05	0.14	DSYELR	K	Y	0.935	31.7	35.1	0	0	1	0	2	782.369	279	284	TRUE
Prosap CG30483-PA [Drosophila melanogaster]	gi|24653538	195882	0.998	2	2	2	9.36e-06	0.0103	QQVLASLPKELK	K	E	0.935	31.9	36.6	0	0	0	1	2	1353.81	48	59	TRUE
Calcium/calmodulin-dependent protein kinase II CG18069-PB, isoform B [Drosophila melanogaster]	gi|24638772,gi|62473187,gi|62484414,gi|62484416	57552.1	0.976	1	1	1	4.68e-06	0.0236	GTVDRSTTVVSK	K	E	0.935	33.1	36.5	0	0	1	0	2	1249.68	351	362	TRUE
Myosin heavy chain CG17927-PA, isoform A [Drosophila melanogaster]	gi|24584704,gi|28574239	224698	1	128	186	2330	0.0109	0.549	AGSVGRGASPAPR	R	A	0.936	33	36.3	0	0	1	0	2	1182.63	1925	1937	TRUE	gi|24584700,gi|24584706,gi|24584710,gi|24584702,gi|24584698
terribly reduced optic lobes CG33950-PF, isoform F [Drosophila melanogaster]	gi|78706474	513388	1	89	107	871	0.00408	0.237	TYPDSQIIK	K	E	0.936	33.2	36.5	0	0	2	0	2	1064.56	1490	1498	TRUE	gi|161077537
Protein disulfide isomerase CG6988-PA, isoform A [Drosophila melanogaster]	gi|17647799	55764.9	1	15	16	73	0.000342	0.341	FAQVQSLPLIVDFNHESASK	K	I	0.936	31.6	36.2	0	0	0	2	2	2230.15	228	247	TRUE
Ribosomal protein L7A CG3314-PD, isoform D [Drosophila melanogaster]	gi|17530825,gi|24640138,gi|24640142	30714.5	1	5	5	20	9.36e-05	0.232	YRPESPLAK	K	K	0.936	32.6	37.1	0	0	0	1	2	1060.58	107	115	TRUE
Myosin heavy chain CG17927-PF, isoform F [Drosophila melanogaster]	gi|24584700	224516	0.998	2	2	20	9.36e-05	0.548	AGSVGRGASPAPR	R	A	0.936	33	36.3	0	0	1	0	2	1182.63	1925	1937	FALSE	gi|24584704,gi|28574239,gi|24584706,gi|24584710,gi|24584702,gi|24584698
CG15203 CG15203-PA [Drosophila melanogaster]	gi|24641174	14011.7	0.997	2	2	2	9.36e-06	0.18	DGSILIEGCGK	K	L	0.936	33.6	36.9	0	0	1	0	2	1148.56	72	82	TRUE
Myosin heavy chain CG17927-PB, isoform B [Drosophila melanogaster]	gi|24584710	224397	0.998	2	2	9	4.21e-05	0.534	AGSVGRGASPAPR	R	A	0.936	33	36.3	0	0	1	0	2	1182.63	1925	1937	FALSE	gi|24584704,gi|24584700,gi|28574239,gi|24584706,gi|24584702,gi|24584698
Myosin heavy chain CG17927-PJ, isoform J [Drosophila melanogaster]	gi|24584698	224394	0.998	2	2	3	1.4e-05	0.541	AGSVGRGASPAPR	R	A	0.936	33	36.3	0	0	1	0	2	1182.63	1923	1935	FALSE	gi|24584704,gi|24584700,gi|28574239,gi|24584706,gi|24584710,gi|24584702
terribly reduced optic lobes CG33950-PG, isoform G [Drosophila melanogaster]	gi|161077537	459070	0.5	1	1	4	1.87e-05	0.256	TYPDSQIIK	K	E	0.936	33.2	36.5	0	0	2	0	2	1064.56	1047	1055	FALSE	gi|78706474
Myosin heavy chain CG17927-PD, isoform D [Drosophila melanogaster]	gi|24584702,gi|24584706	224580	0.994	1	1	38	0.000178	0.544	AGSVGRGASPAPR	R	A	0.936	33	36.3	0	0	1	0	2	1182.63	1925	1937	FALSE	gi|24584704,gi|24584700,gi|28574239,gi|24584710,gi|24584698
Laminin A CG10236-PA [Drosophila melanogaster]	gi|17136292	411103	1	44	48	274	0.00128	0.16	LTVDDVDNKR	R	L	0.937	32.6	37	0	0	0	1	2	1174.61	3148	3157	TRUE
Aldolase CG6058-PF, isoform F [Drosophila melanogaster]	gi|24650276,gi|24650278,gi|24650280,gi|24650282,gi|24650288,gi|45551983,gi|45551985,gi|45553577	39571.9	1	14	14	57	0.000267	0.468	QLLFSTDPK	R	L	0.937	33.6	36.9	0	0	1	0	2	1048.57	61	69	TRUE
Sc2 CG10849-PA [Drosophila melanogaster]	gi|24657023	34168.4	1	7	8	63	0.000295	0.162	VKVPSGATPIGDLR	K	A	0.937	31.9	36.4	0	0	0	1	2	1409.81	17	30	TRUE
CG3835 CG3835-PA, isoform A [Drosophila melanogaster]	gi|18921117,gi|24639275,gi|24639277	58347.2	1	5	5	14	6.55e-05	0.124	EVGLTVPLDLGAK	R	A	0.937	33.3	36.6	0	0	1	0	2	1311.75	197	209	TRUE
Paramyosin CG5939-PA, isoform A [Drosophila melanogaster]	gi|24661112,gi|24661116	102322	1	39	51	578	0.0027	0.494	ANADATSWQNK	K	W	0.938	34	37.1	0	0	1	0	2	1205.56	293	303	TRUE
CG7470 CG7470-PA [Drosophila melanogaster]	gi|21357643	84075.9	1	12	16	101	0.000473	0.21	AATWALDR	K	G	0.938	34.4	37.5	0	0	1	0	2	903.469	301	308	TRUE
Myosin heavy chain CG17927-PA, isoform A [Drosophila melanogaster]	gi|24584704,gi|28574239	224698	1	128	186	2330	0.0109	0.549	NQLFQQK	R	K	0.939	34.2	37.3	0	0	1	0	2	905.485	933	939	TRUE	gi|24584700,gi|24584706,gi|24584710,gi|24584702,gi|24584712,gi|24584698
bent CG32019-PA, isoform A [Drosophila melanogaster]	gi|28558739,gi|45552153	999778	1	118	128	787	0.00368	0.192	IQGYQIEYR	R	D	0.939	33.3	36.4	0	0	2	0	2	1169.6	7078	7086	TRUE
CG10924 CG10924-PA, isoform A [Drosophila melanogaster]	gi|24655082	70655.5	1	8	8	21	9.83e-05	0.154	CVELCQPER	K	V	0.939	34.1	37.2	0	0	2	0	2	1190.53	50	58	TRUE
Rab-protein 2 CG3269-PA [Drosophila melanogaster]	gi|17137088	23543.3	1	5	5	17	7.95e-05	0.286	SCLLLQFTDK	K	R	0.939	32.9	36	0	0	1	0	2	1224.63	20	29	TRUE
Mitochondrial Transcription Factor B1 CG7319-PC, isoform C [Drosophila melanogaster]	gi|45553069	59222.8	1	3	3	4	1.87e-05	0.0483	YGESAPK	K	L	0.939	32.7	35.8	0	0	1	0	2	751.363	116	122	TRUE
Myosin heavy chain CG17927-PF, isoform F [Drosophila melanogaster]	gi|24584700	224516	0.998	2	2	20	9.36e-05	0.548	NQLFQQK	R	K	0.939	34.2	37.3	0	0	1	0	2	905.485	933	939	FALSE	gi|24584704,gi|28574239,gi|24584706,gi|24584710,gi|24584702,gi|24584712,gi|24584698
Myosin heavy chain CG17927-PB, isoform B [Drosophila melanogaster]	gi|24584710	224397	0.998	2	2	9	4.21e-05	0.534	NQLFQQK	R	K	0.939	34.2	37.3	0	0	1	0	2	905.485	933	939	FALSE	gi|24584704,gi|24584700,gi|28574239,gi|24584706,gi|24584702,gi|24584712,gi|24584698
CG8798 CG8798-PA, isoform A [Drosophila melanogaster]	gi|24666867,gi|24666871	92751.7	1	2	2	6	2.81e-05	0.0421	ENVNQSAPSAQPVLIVEVENVK	K	Q	0.939	32.9	36	0	0	1	0	2	2364.24	107	128	TRUE
Uev1A CG10640-PA, isoform A [Drosophila melanogaster]	gi|21355265	16651.5	0.999	2	2	5	2.34e-05	0.179	VNINCINQNNGVVDHR	K	S	0.939	31.8	36.1	0	0	0	1	2	1865.9	88	103	TRUE
Spase 22/23-subunit CG5677-PA [Drosophila melanogaster]	gi|21355207	20286.8	0.997	2	2	5	2.34e-05	0.106	FPADYATSSI	K	-	0.939	32.3	36.9	0	2	0	0	2	1071.5	170	179	TRUE
Myosin heavy chain CG17927-PJ, isoform J [Drosophila melanogaster]	gi|24584698	224394	0.998	2	2	3	1.4e-05	0.541	NQLFQQK	R	K	0.939	34.2	37.3	0	0	1	0	2	905.485	931	937	FALSE	gi|24584704,gi|24584700,gi|28574239,gi|24584706,gi|24584710,gi|24584702,gi|24584712
Myosin heavy chain CG17927-PK, isoform K [Drosophila melanogaster]	gi|24584712	221394	0.993	1	1	1	4.68e-06	0.52	NQLFQQK	R	K	0.939	34.2	37.3	0	0	1	0	2	905.485	933	939	FALSE	gi|24584704,gi|24584700,gi|28574239,gi|24584706,gi|24584710,gi|24584702,gi|24584698
Myosin heavy chain CG17927-PD, isoform D [Drosophila melanogaster]	gi|24584702,gi|24584706	224580	0.994	1	1	38	0.000178	0.544	NQLFQQK	R	K	0.939	34.2	37.3	0	0	1	0	2	905.485	933	939	FALSE	gi|24584704,gi|24584700,gi|28574239,gi|24584710,gi|24584712,gi|24584698
Ribosomal protein L4 CG5502-PA [Drosophila melanogaster]	gi|24650747	45008.5	1	9	9	19	8.89e-05	0.229	QAVIFLR	K	R	0.94	34.9	38	0	0	5	0	2	846.52	169	175	TRUE
AP-50 CG7057-PA, isoform A [Drosophila melanogaster]	gi|24649014,gi|28571823	49838.9	1	7	7	18	8.42e-05	0.22	VNVIHAR	R	Q	0.94	33.2	36.2	0	0	1	0	2	808.479	34	40	TRUE
string of pearls CG5920-PA [Drosophila melanogaster]	gi|17136734	28882.7	1	6	6	30	0.00014	0.251	IGKPHTVPCK	K	V	0.94	31.7	36	0	0	0	1	2	1136.63	157	166	TRUE
Ribosomal protein S8 CG7808-PC [Drosophila melanogaster]	gi|24651181	23742.3	1	5	5	38	0.000178	0.298	SDGYILEGK	R	E	0.94	32.7	35.8	0	0	1	0	2	981.49	187	195	TRUE
Lamin CG6944-PA [Drosophila melanogaster]	gi|17136290	71283.8	1	5	6	15	7.02e-05	0.169	AVVDESEDHSVADYYVSASAK	R	G	0.94	31.8	36.1	0	0	0	1	2	2242.01	450	470	TRUE
His2B:CG17949 CG17949-PA [Drosophila melanogaster]	gi|24585671,gi|78706956,gi|78706964,gi|78706972,gi|78706982,gi|78706990,gi|78707000,gi|78707010,gi|78707020,gi|78707030,gi|78707040,gi|78707050,gi|78707060,gi|78707070,gi|78707080,gi|78707090,gi|78707100,gi|78707110,gi|78707120,gi|78707130,gi|78707140,gi|78707150,gi|78707160	13678.7	1	3	4	20	9.36e-05	0.236	ESYAIYIYK	K	V	0.94	33.6	36.7	0	0	1	0	2	1149.58	33	41	TRUE
CG2970 CG2970-PA [Drosophila melanogaster]	gi|45550506	40514.3	0.997	2	2	4	1.87e-05	0.0683	AAILESEGVR	R	E	0.94	34.3	37.4	0	0	1	0	2	1044.57	207	216	TRUE
alpha actinin CG4376-PC, isoform C [Drosophila melanogaster]	gi|17137758	106358	1	31	34	241	0.00113	0.381	EGLLLWCQR	K	K	0.941	34	37	0	0	1	0	2	1174.6	151	159	TRUE
bellwether CG3612-PA [Drosophila melanogaster]	gi|24658560	59405.3	1	27	35	476	0.00223	0.411	QAVAYR	K	Q	0.941	33.5	36.5	0	0	1	0	2	707.384	316	321	TRUE
Pyruvate kinase CG7070-PB, isoform B [Drosophila melanogaster]	gi|24648964,gi|28571814	57422.3	1	10	12	38	0.000178	0.223	LQFDSPVPHVR	R	L	0.941	32.2	36.4	0	0	0	1	2	1294.69	36	46	TRUE
coracle CG11949-PA, isoform A [Drosophila melanogaster]	gi|24655527	184153	1	8	10	43	0.000201	0.073	GAPGAAAAAAAGAAGAAAAAAKPKK	K	R	0.941	0	0	2.34	0	0	1	2	1962.09	755	779	TRUE
Stretchin-Mlck CG18255-PA, isoform A [Drosophila melanogaster]	gi|24653966	1.03675e+06	1	7	7	9	4.21e-05	0.00831	ISEETIEEPK	K	K	0.941	34.1	37.1	0	0	1	0	2	1174.58	2712	2721	TRUE
Rab-protein 7 CG5915-PA [Drosophila melanogaster]	gi|17865835	23313.1	1	5	5	9	4.21e-05	0.29	VIILGDSSVGK	K	T	0.941	34.3	37.3	0	0	1	0	2	1087.64	11	21	TRUE
CG40084 CG40084-PA, isoform A [Drosophila melanogaster]	gi|161076014,gi|161076016	149356	1	3	3	4	1.87e-05	0.0317	NNGATKYAATYTK	K	A	0.941	33.7	36.7	0	0	1	0	2	1402.7	1114	1126	TRUE
Rab-protein 4 CG4921-PB, isoform B [Drosophila melanogaster]	gi|17647849,gi|24654467,gi|45552705	23556.5	0.997	2	2	2	9.36e-06	0.16	IETGELDPER	K	I	0.941	34.4	37.4	0	0	1	0	2	1158.56	173	182	TRUE
cortex CG11330-PA [Drosophila melanogaster]	gi|17647275	55558.5	0.975	1	1	1	4.68e-06	0.0145	DDRIVIK	R	T	0.941	34	37	0	0	1	0	2	858.505	372	378	TRUE
CG5482 CG5482-PA [Drosophila melanogaster]	gi|19922556	44845.3	1	5	5	13	6.08e-05	0.169	GELVTVNFTGK	R	L	0.942	33.9	36.8	0	0	1	0	2	1164.63	85	95	TRUE
CG6984 CG6984-PA [Drosophila melanogaster]	gi|19922422	31150.4	0.997	2	2	2	9.36e-06	0.0561	IMSRPK	R	S	0.942	35.2	38.1	0	0	1	0	2	731.424	177	182	TRUE
Hrp59 CG9373-PA [Drosophila melanogaster]	gi|24645384	66714.2	0.994	1	1	1	4.68e-06	0.0316	LPEGLGGVGIGLGPNGEPLR	K	D	0.942	33.6	36.5	0	0	1	0	2	1902.05	318	337	TRUE
zormin CG33484-PD, isoform D [Drosophila melanogaster]	gi|116007762	411353	1	35	37	226	0.00106	0.131	CVDPNTGLIYFK	K	Y	0.943	34	36.8	0	0	2	0	2	1426.7	3389	3400	TRUE
Pyruvate kinase CG7070-PB, isoform B [Drosophila melanogaster]	gi|24648964,gi|28571814	57422.3	1	10	12	38	0.000178	0.223	EPGLGDWLK	K	D	0.943	34.1	37	0	0	2	0	2	1014.53	478	486	TRUE
CG2165 CG2165-PE, isoform E [Drosophila melanogaster]	gi|62473099,gi|62473111,gi|62473120,gi|62484399,gi|62484401	125695	1	7	7	35	0.000164	0.085	VYTFNSVR	R	K	0.943	34.3	37.2	0	0	1	0	2	985.511	516	523	TRUE
Vha100-1 CG1709-PE, isoform E [Drosophila melanogaster]	gi|21358171,gi|24650956,gi|24650959,gi|24650961,gi|24650963,gi|24650965,gi|24650967	94799.4	1	7	8	17	7.95e-05	0.106	IEDLNTVLGQTQDHR	R	H	0.943	32.2	36.2	0	0	1	2	2	1738.87	271	285	TRUE
Arc42 CG4703-PA [Drosophila melanogaster]	gi|21356377	43637.7	1	6	6	12	5.61e-05	0.158	LQSIQQK	K	I	0.943	35.3	38.2	0	0	1	0	2	844.489	300	306	TRUE
Ribosomal protein L7A CG3314-PD, isoform D [Drosophila melanogaster]	gi|17530825,gi|24640138,gi|24640142	30714.5	1	5	5	20	9.36e-05	0.232	KPSYVSAGTNTVTK	K	L	0.943	32.3	36.4	0	0	0	1	2	1452.77	137	150	TRUE
CG5080 CG5080-PB, isoform B [Drosophila melanogaster]	gi|19920502,gi|24580801	61218.2	1	4	4	14	6.55e-05	0.0848	IEIMAGEISQSR	R	L	0.943	33.7	36.5	0	0	1	0	2	1349.67	431	442	TRUE
terribly reduced optic lobes CG33950-PF, isoform F [Drosophila melanogaster]	gi|78706474	513388	1	89	107	871	0.00408	0.237	ESAWQR	K	G	0.944	34.9	37.7	0	0	1	0	2	776.369	2364	2369	TRUE	gi|161077537
viking CG16858-PA [Drosophila melanogaster]	gi|17137252	193761	1	18	19	190	0.000889	0.103	GNSFVAR	R	T	0.944	33.6	36.3	0	0	1	0	2	750.39	1738	1744	TRUE
aralar1 CG2139-PC, isoform C [Drosophila melanogaster]	gi|24651387,gi|24651389,gi|24651391,gi|45552009	74886.7	1	14	15	61	0.000285	0.231	QVYLHATEGSR	K	T	0.944	34.1	36.8	0	0	1	0	2	1260.63	234	244	TRUE
stubarista CG14792-PA, isoform A [Drosophila melanogaster]	gi|17136518,gi|24639112,gi|45551198	35323.6	1	7	8	30	0.00014	0.224	TSWGSDGQF	K	-	0.944	32.1	36.1	0	2	0	0	2	984.406	305	313	TRUE
Ribosomal protein L19 CG2746-PA, isoform A [Drosophila melanogaster]	gi|17136322,gi|45552831	23981.5	1	5	5	9	4.21e-05	0.241	VWLDPNEINEIANTNSRQNIRKLIK	K	D	0.944	0	0	2.02	0	1	0	2	2978.62	22	46	TRUE
Dipeptidase B CG9285-PA, isoform A [Drosophila melanogaster]	gi|21358201,gi|24646701,gi|24646703	55516.3	1	3	3	9	4.21e-05	0.0866	MCMTDALCRMK	R	E	0.944	33.9	36.7	0	0	1	0	2	1432.59	344	354	TRUE
CG9914 CG9914-PA [Drosophila melanogaster]	gi|45549573	34769	1	3	3	3	1.4e-05	0.127	GAIFVQECIPER	K	L	0.944	33.9	36.7	0	0	1	0	2	1418.71	86	97	TRUE
Diphenol oxidase A2 CG10484-PA [Drosophila melanogaster]	gi|17137450	55988.4	0.996	2	2	2	9.36e-06	0.0445	SVYPESASNNEWAR	K	F	0.944	33.7	36.4	0	0	1	0	2	1609.72	235	248	TRUE
Glutathione S transferase E6 CG17530-PA [Drosophila melanogaster]	gi|19922532	24997.4	0.997	2	2	3	1.4e-05	0.104	LTLYGLDPSPPVR	K	A	0.944	34	36.8	0	0	1	0	2	1427.79	4	16	TRUE
terribly reduced optic lobes CG33950-PG, isoform G [Drosophila melanogaster]	gi|161077537	459070	0.5	1	1	4	1.87e-05	0.256	ESAWQR	K	G	0.944	34.9	37.7	0	0	1	0	2	776.369	1891	1896	FALSE	gi|78706474
CG11963 CG11963-PB, isoform B [Drosophila melanogaster]	gi|161078106,gi|24645208	54791.9	1	12	12	179	0.000837	0.259	LRFDDNAEFR	K	Q	0.945	33.6	36.3	0	0	1	0	2	1282.62	260	269	TRUE
Myosin light chain 2 CG2184-PA, isoform A [Drosophila melanogaster]	gi|17933672	23697.5	1	11	15	196	0.000917	0.518	AAFDSVGK	R	I	0.945	32.8	35.5	0	0	1	0	2	794.405	102	109	TRUE
Vha100-1 CG1709-PE, isoform E [Drosophila melanogaster]	gi|21358171,gi|24650956,gi|24650959,gi|24650961,gi|24650963,gi|24650965,gi|24650967	94799.4	1	7	8	17	7.95e-05	0.106	SGSSVPPILNR	R	M	0.945	33.7	36.4	0	0	1	0	2	1126.62	350	360	TRUE
Eukaryotic initiation factor 4a CG9075-PC, isoform C [Drosophila melanogaster]	gi|17136248,gi|24582075,gi|24582078,gi|24582080	45861.3	0.991	1	1	1	4.68e-06	0.0199	DPVSILVK	R	K	0.945	34.1	36.9	0	0	1	0	2	870.53	227	234	TRUE
bent CG32019-PA, isoform A [Drosophila melanogaster]	gi|28558739,gi|45552153	999778	1	118	128	787	0.00368	0.192	IITPLNEVR	K	I	0.946	33.2	35.9	0	0	1	0	2	1054.63	5864	5872	TRUE
beta Spectrin CG5870-PA [Drosophila melanogaster]	gi|17647191	265726	1	23	25	77	0.00036	0.138	HLMGVEDLLQK	K	H	0.946	33.8	36.5	0	0	1	0	2	1298.68	555	565	TRUE
CG5703 CG5703-PA [Drosophila melanogaster]	gi|18859877	26764.6	1	9	9	37	0.000173	0.388	QLGIGVGDTTK	K	D	0.946	34.8	37.4	0	0	1	0	2	1088.6	148	158	TRUE
CG2107 CG2107-PA [Drosophila melanogaster]	gi|24656312	75091.1	1	6	6	11	5.15e-05	0.112	ATNLIISSLR	R	F	0.946	34.7	37.3	0	0	1	0	2	1087.65	148	157	TRUE
Mdh CG5889-PA [Drosophila melanogaster]	gi|21356279	68577.4	1	6	6	9	4.21e-05	0.105	TQEEQLQLCK	K	I	0.946	34.2	36.8	0	0	1	0	2	1276.62	88	97	TRUE
CG33275 CG33275-PA, isoform A [Drosophila melanogaster]	gi|161082060,gi|161082065	157700	0.997	1	1	1	4.68e-06	0.0105	KVTLLFNEVDRAAQR	R	L	0.946	33.7	36.4	0	0	1	0	2	1759.98	537	551	TRUE
bent CG32019-PA, isoform A [Drosophila melanogaster]	gi|28558739,gi|45552153	999778	1	118	128	787	0.00368	0.192	SLSSSDILDLR	K	Y	0.947	34.5	37.1	0	0	1	0	2	1205.64	8668	8678	TRUE
Paramyosin CG5939-PA, isoform A [Drosophila melanogaster]	gi|24661112,gi|24661116	102322	1	39	51	578	0.0027	0.494	AEEVEEIRR	R	K	0.947	33.5	37.2	0	0	0	1	2	1130.58	312	320	TRUE
upheld CG7107-PF, isoform F [Drosophila melanogaster]	gi|62473664	47113.5	1	17	23	236	0.0011	0.405	LFEGGWDEISKDSNEK	K	I	0.947	33.8	36.3	0	0	1	0	2	1853.86	279	294	TRUE	gi|62473654,gi|24641813
CG1140 CG1140-PA, isoform A [Drosophila melanogaster]	gi|21358325	54887.9	1	6	6	10	4.68e-05	0.163	LVGNRSLGAR	R	Y	0.947	34.3	36.8	0	0	1	0	2	1042.61	5	14	TRUE
Rab-protein 2 CG3269-PA [Drosophila melanogaster]	gi|17137088	23543.3	1	5	5	17	7.95e-05	0.286	MITIDGKQIK	R	L	0.947	34.5	37.1	0	0	1	0	2	1162.65	47	56	TRUE
sluggish A CG1417-PE, isoform E [Drosophila melanogaster]	gi|24643715,gi|24643717,gi|24643719,gi|24643721,gi|45556158,gi|45556169,gi|45556180	75936.5	1	3	3	6	2.81e-05	0.0493	LLLSEIRR	R	R	0.947	34.6	37.2	0	0	2	0	2	999.632	644	651	TRUE
Iron regulatory protein 1B CG6342-PA [Drosophila melanogaster]	gi|24645686	98563.1	0.995	2	2	2	9.36e-06	0.0256	AVIAESYER	K	I	0.947	33.5	36	0	0	1	0	2	1037.53	804	812	TRUE
upheld CG7107-PA, isoform A [Drosophila melanogaster]	gi|24641813	47430.7	0.998	2	2	17	7.95e-05	0.408	LFEGGWDEISKDSNEK	K	I	0.947	33.8	36.3	0	0	1	0	2	1853.86	283	298	FALSE	gi|62473654,gi|62473664
upheld CG7107-PG, isoform G [Drosophila melanogaster]	gi|62473654	47331.6	0.986	1	1	1	4.68e-06	0.407	LFEGGWDEISKDSNEK	K	I	0.947	33.8	36.3	0	0	1	0	2	1853.86	282	297	FALSE	gi|24641813,gi|62473664
bellwether CG3612-PA [Drosophila melanogaster]	gi|24658560	59405.3	1	27	35	476	0.00223	0.411	ELIIGDR	R	Q	0.948	35.2	37.7	0	0	3	0	2	815.463	207	213	TRUE
NADH:ubiquinone reductase 23kD subunit precursor CG3944-PA [Drosophila melanogaster]	gi|17864306	24560.7	1	6	6	8	3.74e-05	0.313	RYPSGEER	R	C	0.948	34.2	36.7	0	0	1	0	2	993.475	110	117	TRUE
CG13506 CG13506-PA [Drosophila melanogaster]	gi|22026914	57054.6	1	4	4	4	1.87e-05	0.111	ITHQLELSR	K	G	0.948	32.2	35.9	0	0	0	1	2	1096.61	415	423	TRUE
polyA-binding protein CG5119-PA, isoform A [Drosophila melanogaster]	gi|17136378,gi|24654793,gi|24654797,gi|24654800,gi|24654804,gi|24654807,gi|24654810,gi|45552715	69908	1	3	3	4	1.87e-05	0.0615	SGVGNVFIK	R	N	0.948	34.2	36.7	0	0	1	0	2	920.521	87	95	TRUE
CG12455 CG12455-PA, isoform A [Drosophila melanogaster]	gi|24584558	249743	0.999	2	2	2	9.36e-06	0.0114	IKNIVELLK	K	K	0.948	32.5	36.2	0	0	0	1	2	1069.7	1873	1881	TRUE
Cytochrome P450-4g1 CG3972-PA [Drosophila melanogaster]	gi|17933498	62954.7	1	24	31	601	0.00281	0.39	RLDYDLK	R	L	0.949	32.8	36.3	0	1	0	0	2	922.5	429	435	TRUE
CG7461 CG7461-PA [Drosophila melanogaster]	gi|24655582	71311.2	1	19	21	96	0.000449	0.345	NLQAATSSHHR	K	S	0.949	32.9	36.6	0	0	0	2	2	1221.61	617	627	TRUE
Zeelin1 CG6803-PB, isoform B [Drosophila melanogaster]	gi|21357797	41650.6	1	13	14	71	0.000332	0.405	MQEIER	R	R	0.949	35.1	37.5	0	0	1	0	2	805.388	118	123	TRUE
Ribosomal protein L4 CG5502-PA [Drosophila melanogaster]	gi|24650747	45008.5	1	9	9	19	8.89e-05	0.229	APIRPDVVNEVHQLLR	K	R	0.949	0	0	2.42	0	0	1	2	1856.05	33	48	TRUE
CG5261 CG5261-PB, isoform B [Drosophila melanogaster]	gi|20129315	54234.2	1	8	8	69	0.000323	0.17	GSIVSWEK	R	K	0.949	34.9	37.3	0	0	1	0	2	905.473	95	102	TRUE
Cytochrome c oxidase subunit Va CG14724-PA, isoform A [Drosophila melanogaster]	gi|17137302,gi|24646112	16605.1	1	6	6	17	7.95e-05	0.342	IIEAGLR	K	A	0.949	35.2	37.6	0	0	1	0	2	771.473	76	82	TRUE
CG8443 CG8443-PA [Drosophila melanogaster]	gi|20130037	160837	1	3	3	6	2.81e-05	0.0366	GAMAVIDGNVLAINPGEDTK	R	M	0.949	33.9	36.4	0	0	4	0	2	2001	485	504	TRUE
CG9914 CG9914-PA [Drosophila melanogaster]	gi|45549573	34769	1	3	3	3	1.4e-05	0.127	LTAAQQFACISGTNDLK	K	E	0.949	34	36.4	0	0	1	0	2	1837.91	65	81	TRUE
Proteasome alpha7 subunit CG1519-PA, isoform A [Drosophila melanogaster]	gi|24652204	27658.1	1	2	2	4	1.87e-05	0.119	VTGGLHLINPSELTEK	R	A	0.949	32.9	36.4	0	0	0	1	2	1707.93	219	234	TRUE
Myosin heavy chain CG17927-PA, isoform A [Drosophila melanogaster]	gi|24584704,gi|28574239	224698	1	128	186	2330	0.0109	0.549	ADLAEQAISK	R	F	0.95	79.7	37.3	0	2	10	0	2	1045.55	1909	1918	TRUE	gi|24584700,gi|24584706,gi|24584710,gi|24584702,gi|24584712,gi|24584698
Myosin heavy chain CG17927-PA, isoform A [Drosophila melanogaster]	gi|24584704,gi|28574239	224698	1	128	186	2330	0.0109	0.549	ADQEISGLK	K	K	0.95	83.5	37.6	0	1	4	0	2	960.5	942	950	TRUE	gi|24584700,gi|24584706,gi|24584710,gi|24584702,gi|24584712,gi|24584698
Myosin heavy chain CG17927-PA, isoform A [Drosophila melanogaster]	gi|24584704,gi|28574239	224698	1	128	186	2330	0.0109	0.549	ADQEISGLKK	K	D	0.95	53.8	37.5	0	0	3	0	2	1088.6	942	951	TRUE	gi|24584700,gi|24584706,gi|24584710,gi|24584702,gi|24584712,gi|24584698
Myosin heavy chain CG17927-PA, isoform A [Drosophila melanogaster]	gi|24584704,gi|28574239	224698	1	128	186	2330	0.0109	0.549	AEDMSNLTYLNDASVLHNLR	K	Q	0.95	92.7	35.8	3.03	0	4	16	2	2292.09	88	107	TRUE	gi|24584700,gi|24584706,gi|24584710,gi|24584702,gi|24584712
Myosin heavy chain CG17927-PA, isoform A [Drosophila melanogaster]	gi|24584704,gi|28574239	224698	1	128	186	2330	0.0109	0.549	AEELHAAEVK	K	V	0.95	67.4	35.9	0	0	5	1	2	1096.56	858	867	TRUE	gi|24584700,gi|24584706,gi|24584710,gi|24584702,gi|24584712,gi|24584698
Myosin heavy chain CG17927-PA, isoform A [Drosophila melanogaster]	gi|24584704,gi|28574239	224698	1	128	186	2330	0.0109	0.549	AGVDHITNEK	R	A	0.95	69.7	36	0	0	9	5	2	1083.54	1232	1241	TRUE	gi|24584700,gi|24584706,gi|24584702,gi|24584698
Myosin heavy chain CG17927-PA, isoform A [Drosophila melanogaster]	gi|24584704,gi|28574239	224698	1	128	186	2330	0.0109	0.549	AGVLGQMEEFR	R	D	0.95	78.3	36.4	0	0	36	0	2	1236.6	766	776	TRUE	gi|24584700,gi|24584706,gi|24584710,gi|24584702,gi|24584712,gi|24584698
Myosin heavy chain CG17927-PA, isoform A [Drosophila melanogaster]	gi|24584704,gi|28574239	224698	1	128	186	2330	0.0109	0.549	AGVLGQMEEFRDER	R	L	0.95	50.3	36.3	1.85	0	0	13	2	1652.77	766	779	TRUE	gi|24584700,gi|24584706,gi|24584710,gi|24584702,gi|24584712,gi|24584698
Myosin heavy chain CG17927-PA, isoform A [Drosophila melanogaster]	gi|24584704,gi|28574239	224698	1	128	186	2330	0.0109	0.549	ALDSMQASLEAEAK	R	G	0.95	115	36.5	0	0	72	0	2	1463.71	1592	1605	TRUE	gi|24584700,gi|24584706,gi|24584710,gi|24584702,gi|24584712,gi|24584698
Myosin heavy chain CG17927-PA, isoform A [Drosophila melanogaster]	gi|24584704,gi|28574239	224698	1	128	186	2330	0.0109	0.549	ALEQQIK	K	E	0.95	48	37.5	0	0	5	0	2	829.479	1784	1790	TRUE	gi|24584700,gi|24584706,gi|24584710,gi|24584702,gi|24584712,gi|24584698
Myosin heavy chain CG17927-PA, isoform A [Drosophila melanogaster]	gi|24584704,gi|28574239	224698	1	128	186	2330	0.0109	0.549	AMVDAAR	K	L	0.95	52.7	37.6	0	0	6	0	2	733.367	1757	1763	TRUE	gi|24584700,gi|24584706,gi|24584710,gi|24584702,gi|24584712,gi|24584698
Myosin heavy chain CG17927-PA, isoform A [Drosophila melanogaster]	gi|24584704,gi|28574239	224698	1	128	186	2330	0.0109	0.549	ANAEAQVWR	K	S	0.95	82.6	37.4	0	0	7	0	2	1044.52	1363	1371	TRUE	gi|24584700,gi|24584706,gi|24584710,gi|24584702,gi|24584712,gi|24584698
Myosin heavy chain CG17927-PA, isoform A [Drosophila melanogaster]	gi|24584704,gi|28574239	224698	1	128	186	2330	0.0109	0.549	ANAIANAAEK	R	K	0.95	59.2	37.3	0	0	6	0	2	972.511	1434	1443	TRUE	gi|24584700,gi|24584706,gi|24584710,gi|24584702,gi|24584712,gi|24584698
Myosin heavy chain CG17927-PA, isoform A [Drosophila melanogaster]	gi|24584704,gi|28574239	224698	1	128	186	2330	0.0109	0.549	ANALQNELEESR	R	T	0.95	83.8	36.9	0	0	21	0	2	1373.67	1677	1688	TRUE	gi|24584700,gi|24584706,gi|24584710,gi|24584702,gi|24584712,gi|24584698
Myosin heavy chain CG17927-PA, isoform A [Drosophila melanogaster]	gi|24584704,gi|28574239	224698	1	128	186	2330	0.0109	0.549	AQLELSQVR	R	Q	0.95	78.3	37.3	0	1	43	0	2	1043.59	1560	1568	TRUE	gi|24584700,gi|24584706,gi|24584710,gi|24584702,gi|24584712,gi|24584698
Myosin heavy chain CG17927-PA, isoform A [Drosophila melanogaster]	gi|24584704,gi|28574239	224698	1	128	186	2330	0.0109	0.549	AQQELEEAEER	K	A	0.95	88.4	36.9	0	0	25	0	2	1331.61	1898	1908	TRUE	gi|24584700,gi|24584706,gi|24584710,gi|24584702,gi|24584712,gi|24584698
Myosin heavy chain CG17927-PA, isoform A [Drosophila melanogaster]	gi|24584704,gi|28574239	224698	1	128	186	2330	0.0109	0.549	ATDQTFSEK	K	L	0.95	55.7	36	0	0	11	0	2	1026.47	542	550	TRUE	gi|24584700,gi|24584706,gi|24584710,gi|24584702,gi|24584712,gi|24584698
Myosin heavy chain CG17927-PA, isoform A [Drosophila melanogaster]	gi|24584704,gi|28574239	224698	1	128	186	2330	0.0109	0.549	ATEIIIK	K	F	0.95	41.7	38.1	0	1	1	0	2	787.493	740	746	TRUE	gi|161076705,gi|24584698
Myosin heavy chain CG17927-PA, isoform A [Drosophila melanogaster]	gi|24584704,gi|28574239	224698	1	128	186	2330	0.0109	0.549	ATSVRPQFDGLAFPPR	R	F	0.95	34.8	36.4	0	0	2	2	2	1758.93	1938	1953	TRUE	gi|24584700,gi|24584706,gi|24584710,gi|24584702,gi|24584698
Myosin heavy chain CG17927-PA, isoform A [Drosophila melanogaster]	gi|24584704,gi|28574239	224698	1	128	186	2330	0.0109	0.549	CIIPNEMK	R	Q	0.95	42.3	37.2	0	0	3	0	2	1004.49	673	680	TRUE	gi|24584700,gi|24584706,gi|24584710,gi|24584702,gi|24584712,gi|24584698
Myosin heavy chain CG17927-PA, isoform A [Drosophila melanogaster]	gi|24584704,gi|28574239	224698	1	128	186	2330	0.0109	0.549	CNETLDTQQK	K	R	0.95	65.5	36.4	0	0	18	0	2	1236.55	442	451	TRUE	gi|24584700,gi|24584706,gi|24584710,gi|24584702,gi|24584712,gi|24584698
Myosin heavy chain CG17927-PA, isoform A [Drosophila melanogaster]	gi|24584704,gi|28574239	224698	1	128	186	2330	0.0109	0.549	DIEDLELNVQK	K	A	0.95	92.5	36.9	0	1	26	0	2	1315.67	952	962	TRUE	gi|24584700,gi|24584706,gi|24584710,gi|24584702,gi|24584712,gi|24584698
Myosin heavy chain CG17927-PA, isoform A [Drosophila melanogaster]	gi|24584704,gi|28574239	224698	1	128	186	2330	0.0109	0.549	DIQTALEEEQR	K	A	0.95	76.3	36.9	0	3	27	0	2	1331.64	1651	1661	TRUE	gi|24584700,gi|24584706,gi|24584710,gi|24584702,gi|24584712,gi|24584698
Myosin heavy chain CG17927-PA, isoform A [Drosophila melanogaster]	gi|24584704,gi|28574239	224698	1	128	186	2330	0.0109	0.549	DKELSSITAK	K	L	0.95	53.3	36.8	0	0	3	0	2	1091.6	1083	1092	TRUE	gi|24584700,gi|24584706,gi|24584710,gi|24584702,gi|24584712,gi|24584698
Myosin heavy chain CG17927-PA, isoform A [Drosophila melanogaster]	gi|24584704,gi|28574239	224698	1	128	186	2330	0.0109	0.549	DLEEANIQHESTLANLR	R	K	0.95	132	36.3	0	0	37	19	2	1952.97	1176	1192	TRUE	gi|24584700,gi|24584706,gi|24584710,gi|24584702,gi|24584712,gi|24584698
Myosin heavy chain CG17927-PA, isoform A [Drosophila melanogaster]	gi|24584704,gi|28574239	224698	1	128	186	2330	0.0109	0.549	DLLDQIGEGGR	K	N	0.95	78.8	37	0	4	49	0	2	1172.59	1510	1520	TRUE	gi|24584700,gi|24584706,gi|24584710,gi|24584702,gi|24584712,gi|24584698
Myosin heavy chain CG17927-PA, isoform A [Drosophila melanogaster]	gi|24584704,gi|28574239	224698	1	128	186	2330	0.0109	0.549	DLLQQVNPPK	K	Y	0.95	85.3	36.2	0	1	43	0	2	1151.64	75	84	TRUE	gi|24584700,gi|24584706,gi|24584710,gi|24584702,gi|24584712
Myosin heavy chain CG17927-PA, isoform A [Drosophila melanogaster]	gi|24584704,gi|28574239	224698	1	128	186	2330	0.0109	0.549	DPLNDTVVDQFK	K	K	0.95	93.9	36.7	0	0	16	0	2	1390.69	599	610	TRUE	gi|24584700,gi|24584706,gi|24584710,gi|24584702,gi|24584712,gi|24584698
Myosin heavy chain CG17927-PA, isoform A [Drosophila melanogaster]	gi|24584704,gi|28574239	224698	1	128	186	2330	0.0109	0.549	EEEFENTR	K	K	0.95	43.8	35.9	0	0	3	0	2	1053.45	1579	1586	TRUE	gi|24584700,gi|24584706,gi|24584710,gi|24584702,gi|24584712,gi|24584698
Myosin heavy chain CG17927-PA, isoform A [Drosophila melanogaster]	gi|24584704,gi|28574239	224698	1	128	186	2330	0.0109	0.549	EEQAEQDGEEEGGR	R	V	0.95	97.3	36.5	0	0	3	0	2	1562.62	369	382	TRUE	gi|24584700,gi|24584706,gi|24584710,gi|24584702,gi|24584712,gi|24584698
Myosin heavy chain CG17927-PA, isoform A [Drosophila melanogaster]	gi|24584704,gi|28574239	224698	1	128	186	2330	0.0109	0.549	EGYLLGEIK	K	A	0.95	62.1	36.6	0	2	30	0	2	1021.56	45	53	TRUE	gi|24584700,gi|24584706,gi|24584710,gi|24584702,gi|24584712,gi|24584698
Myosin heavy chain CG17927-PA, isoform A [Drosophila melanogaster]	gi|24584704,gi|28574239	224698	1	128	186	2330	0.0109	0.549	EKNEYYGQLNDLR	K	A	0.95	72.1	36.5	0	0	23	9	2	1641.79	1219	1231	TRUE	gi|24584700,gi|24584706,gi|24584702,gi|24584698
Myosin heavy chain CG17927-PA, isoform A [Drosophila melanogaster]	gi|24584704,gi|28574239	224698	1	128	186	2330	0.0109	0.549	ELEALNAK	K	L	0.95	38.3	37.4	0	1	0	0	2	887.484	871	878	TRUE	gi|24584700,gi|24584706,gi|24584710,gi|24584702,gi|24584712,gi|24584698
Myosin heavy chain CG17927-PA, isoform A [Drosophila melanogaster]	gi|24584704,gi|28574239	224698	1	128	186	2330	0.0109	0.549	ELEELGER	R	L	0.95	43	37.4	0	1	4	0	2	974.48	1141	1148	TRUE	gi|24584700,gi|24584706,gi|24584710,gi|24584702,gi|24584712,gi|24584698
Myosin heavy chain CG17927-PA, isoform A [Drosophila melanogaster]	gi|24584704,gi|28574239	224698	1	128	186	2330	0.0109	0.549	ELENELDGEQR	R	R	0.95	78.7	36.9	0	0	16	0	2	1331.61	1820	1830	TRUE	gi|24584700,gi|24584706,gi|24584710,gi|24584702,gi|24584712,gi|24584698
Myosin heavy chain CG17927-PA, isoform A [Drosophila melanogaster]	gi|24584704,gi|28574239	224698	1	128	186	2330	0.0109	0.549	ELEQTIQR	K	K	0.95	46	37.5	0	0	2	0	2	1016.54	1074	1081	TRUE	gi|24584700,gi|24584706,gi|24584710,gi|24584702,gi|24584712,gi|24584698
Myosin heavy chain CG17927-PA, isoform A [Drosophila melanogaster]	gi|24584704,gi|28574239	224698	1	128	186	2330	0.0109	0.549	ELSFQSEEDR	K	K	0.95	61.3	36.2	0	0	11	0	2	1239.55	1848	1857	TRUE	gi|24584700,gi|24584706,gi|24584710,gi|24584702,gi|24584712,gi|24584698
Myosin heavy chain CG17927-PA, isoform A [Drosophila melanogaster]	gi|24584704,gi|28574239	224698	1	128	186	2330	0.0109	0.549	ELSFQSEEDRK	K	N	0.95	49.7	36.2	0	0	5	0	2	1367.64	1848	1858	TRUE	gi|24584700,gi|24584706,gi|24584710,gi|24584702,gi|24584712,gi|24584698
Myosin heavy chain CG17927-PA, isoform A [Drosophila melanogaster]	gi|24584704,gi|28574239	224698	1	128	186	2330	0.0109	0.549	EQLGISER	R	R	0.95	43.9	37.3	0	0	8	0	2	931.485	1668	1675	TRUE	gi|24584700,gi|24584706,gi|24584710,gi|24584702,gi|24584712,gi|24584698
Myosin heavy chain CG17927-PA, isoform A [Drosophila melanogaster]	gi|24584704,gi|28574239	224698	1	128	186	2330	0.0109	0.549	EQLNSLMTTLR	K	S	0.95	77.3	36.5	0	0	53	0	2	1321.68	654	664	TRUE	gi|24584700,gi|24584706,gi|24584710,gi|24584702,gi|24584712,gi|24584698
Myosin heavy chain CG17927-PA, isoform A [Drosophila melanogaster]	gi|24584704,gi|28574239	224698	1	128	186	2330	0.0109	0.549	EQVEEEAEGK	R	A	0.95	67.3	37	0	0	12	0	2	1147.51	1344	1353	TRUE	gi|24584700,gi|24584706,gi|24584710,gi|24584702,gi|24584712,gi|24584698
Myosin heavy chain CG17927-PA, isoform A [Drosophila melanogaster]	gi|24584704,gi|28574239	224698	1	128	186	2330	0.0109	0.549	FDLAPENEF	R	-	0.95	47.5	36.1	0	0	22	0	2	1081.48	1954	1962	TRUE	gi|24584700,gi|24584706,gi|24584710,gi|24584702,gi|24584698
Myosin heavy chain CG17927-PA, isoform A [Drosophila melanogaster]	gi|24584704,gi|28574239	224698	1	128	186	2330	0.0109	0.549	FIDLPEDQYR	K	L	0.95	59.3	36.2	0	0	11	0	2	1295.63	747	756	TRUE	gi|24584698
Myosin heavy chain CG17927-PA, isoform A [Drosophila melanogaster]	gi|24584704,gi|28574239	224698	1	128	186	2330	0.0109	0.549	GALQDYQER	K	N	0.95	72.9	36.4	0	0	14	0	2	1079.51	895	903	TRUE	gi|24584700,gi|24584706,gi|24584710,gi|24584702,gi|24584712,gi|24584698
Myosin heavy chain CG17927-PA, isoform A [Drosophila melanogaster]	gi|24584704,gi|28574239	224698	1	128	186	2330	0.0109	0.549	GAYEEGQEQLEAVR	K	R	0.95	107	36.3	0	0	23	1	2	1578.74	1485	1498	TRUE	gi|24584700,gi|24584706,gi|24584710,gi|24584702,gi|24584712,gi|24584698
Myosin heavy chain CG17927-PA, isoform A [Drosophila melanogaster]	gi|24584704,gi|28574239	224698	1	128	186	2330	0.0109	0.549	GDIVSVGLQGGETR	K	D	0.95	97.9	37	0	0	17	0	2	1387.72	57	70	TRUE	gi|24584700,gi|24584706,gi|24584710,gi|24584702,gi|24584712
Myosin heavy chain CG17927-PA, isoform A [Drosophila melanogaster]	gi|24584704,gi|28574239	224698	1	128	186	2330	0.0109	0.549	GGGFATVSSAYK	K	E	0.95	73.5	37.2	0	1	45	0	2	1144.56	642	653	TRUE	gi|24584700,gi|24584706,gi|24584710,gi|24584702,gi|24584712,gi|24584698
Myosin heavy chain CG17927-PA, isoform A [Drosophila melanogaster]	gi|24584704,gi|28574239	224698	1	128	186	2330	0.0109	0.549	GREEQAEQDGEEEGGR	R	V	0.95	118	36.7	0	0	10	11	2	1775.74	367	382	TRUE	gi|24584700,gi|24584706,gi|24584710,gi|24584702,gi|24584712,gi|24584698
Myosin heavy chain CG17927-PA, isoform A [Drosophila melanogaster]	gi|24584704,gi|28574239	224698	1	128	186	2330	0.0109	0.549	GSLEDQVVQTNPVLEAFGNAK	K	T	0.95	141	36.2	0	0	38	6	2	2216.12	213	233	TRUE	gi|24584700,gi|24584706,gi|24584710,gi|24584702,gi|24584712,gi|24584698
Myosin heavy chain CG17927-PA, isoform A [Drosophila melanogaster]	gi|24584704,gi|28574239	224698	1	128	186	2330	0.0109	0.549	HNDAVAEMAEQVDQLNK	K	L	0.95	163	36.3	0	0	47	13	2	1911.89	1195	1211	TRUE	gi|24584700,gi|24584706,gi|24584710,gi|24584702,gi|24584712,gi|24584698
Myosin heavy chain CG17927-PA, isoform A [Drosophila melanogaster]	gi|24584704,gi|28574239	224698	1	128	186	2330	0.0109	0.549	IDQSKPYDSK	R	K	0.95	46.6	36.3	0	0	3	0	2	1180.59	26	35	TRUE	gi|24584700,gi|24584706,gi|24584710,gi|24584702,gi|24584712,gi|24584698
Myosin heavy chain CG17927-PA, isoform A [Drosophila melanogaster]	gi|24584704,gi|28574239	224698	1	128	186	2330	0.0109	0.549	IEDEIAR	R	L	0.95	36.6	38.2	0	0	1	0	2	845.437	844	850	TRUE	gi|24584700,gi|24584706,gi|24584710,gi|24584702,gi|24584712,gi|24584698
Myosin heavy chain CG17927-PA, isoform A [Drosophila melanogaster]	gi|24584704,gi|28574239	224698	1	128	186	2330	0.0109	0.549	IEELEEEVEAER	R	Q	0.95	106	36.8	0	2	58	0	2	1474.69	1114	1125	TRUE	gi|24584700,gi|24584706,gi|24584710,gi|24584702,gi|24584712,gi|24584698
Myosin heavy chain CG17927-PA, isoform A [Drosophila melanogaster]	gi|24584704,gi|28574239	224698	1	128	186	2330	0.0109	0.549	IHFGPTGK	R	L	0.95	36.6	35.6	0	0	5	0	2	856.468	249	256	TRUE	gi|24584700,gi|24584706,gi|24584710,gi|24584702,gi|24584712,gi|24584698
Myosin heavy chain CG17927-PA, isoform A [Drosophila melanogaster]	gi|24584704,gi|28574239	224698	1	128	186	2330	0.0109	0.549	IIGEWK	K	L	0.95	43	38.3	0	0	2	0	2	745.425	1451	1456	TRUE	gi|24584700,gi|24584706,gi|24584710,gi|24584702,gi|24584712,gi|24584698
Myosin heavy chain CG17927-PA, isoform A [Drosophila melanogaster]	gi|24584704,gi|28574239	224698	1	128	186	2330	0.0109	0.549	IMSWMQAWAR	K	G	0.95	72.9	36.3	0	0	4	0	2	1311.6	783	792	TRUE	gi|24584700,gi|24584706,gi|24584710,gi|24584702,gi|24584712,gi|24584698
Myosin heavy chain CG17927-PA, isoform A [Drosophila melanogaster]	gi|24584704,gi|28574239	224698	1	128	186	2330	0.0109	0.549	IQEKEEEFENTR	R	K	0.95	85.5	36.4	0	0	20	5	2	1551.73	1575	1586	TRUE	gi|24584700,gi|24584706,gi|24584710,gi|24584702,gi|24584712,gi|24584698
Myosin heavy chain CG17927-PA, isoform A [Drosophila melanogaster]	gi|24584704,gi|28574239	224698	1	128	186	2330	0.0109	0.549	IQEKEEEFENTRK	R	N	0.95	60.1	36.2	0	0	0	4	2	1679.82	1575	1587	TRUE	gi|24584700,gi|24584706,gi|24584710,gi|24584702,gi|24584712,gi|24584698
Myosin heavy chain CG17927-PA, isoform A [Drosophila melanogaster]	gi|24584704,gi|28574239	224698	1	128	186	2330	0.0109	0.549	ISLTTQLEDTK	K	R	0.95	83.8	36.7	0	1	5	0	2	1248.67	1305	1315	TRUE	gi|24584700,gi|24584706,gi|24584710,gi|24584702,gi|24584712,gi|24584698
Myosin heavy chain CG17927-PA, isoform A [Drosophila melanogaster]	gi|24584704,gi|28574239	224698	1	128	186	2330	0.0109	0.549	ISLTTQLEDTKR	K	L	0.95	77.7	36.7	0	0	26	15	2	1404.77	1305	1316	TRUE	gi|24584700,gi|24584706,gi|24584710,gi|24584702,gi|24584712,gi|24584698
Myosin heavy chain CG17927-PA, isoform A [Drosophila melanogaster]	gi|24584704,gi|28574239	224698	1	128	186	2330	0.0109	0.549	ITAAVMHMGGMK	R	F	0.95	41.5	36.3	0	0	1	1	2	1278.6	351	362	TRUE	gi|24584700,gi|24584706,gi|24584710,gi|24584702,gi|24584712,gi|24584698
Myosin heavy chain CG17927-PA, isoform A [Drosophila melanogaster]	gi|24584704,gi|28574239	224698	1	128	186	2330	0.0109	0.549	KADQEISGLK	K	K	0.95	67.7	37.5	0	0	3	0	2	1088.6	941	950	TRUE	gi|24584700,gi|24584706,gi|24584710,gi|24584702,gi|24584712,gi|24584698
Myosin heavy chain CG17927-PA, isoform A [Drosophila melanogaster]	gi|24584704,gi|28574239	224698	1	128	186	2330	0.0109	0.549	KADQEISGLKK	K	D	0.95	57.7	37.2	0	0	0	7	2	1216.69	941	951	TRUE	gi|24584700,gi|24584706,gi|24584710,gi|24584702,gi|24584712,gi|24584698
Myosin heavy chain CG17927-PA, isoform A [Drosophila melanogaster]	gi|24584704,gi|28574239	224698	1	128	186	2330	0.0109	0.549	KAEELHAAEVK	K	V	0.95	73.5	36	0	0	4	2	2	1224.66	857	867	TRUE	gi|24584700,gi|24584706,gi|24584710,gi|24584702,gi|24584712,gi|24584698
Myosin heavy chain CG17927-PA, isoform A [Drosophila melanogaster]	gi|24584704,gi|28574239	224698	1	128	186	2330	0.0109	0.549	KALEQQIK	R	E	0.95	61.2	36.9	0	0	5	0	2	957.573	1783	1790	TRUE	gi|24584700,gi|24584706,gi|24584710,gi|24584702,gi|24584712,gi|24584698
Myosin heavy chain CG17927-PA, isoform A [Drosophila melanogaster]	gi|24584704,gi|28574239	224698	1	128	186	2330	0.0109	0.549	KAQQELEEAEER	R	A	0.95	93	36.8	0	0	9	3	2	1459.7	1897	1908	TRUE	gi|24584700,gi|24584706,gi|24584710,gi|24584702,gi|24584712,gi|24584698
Myosin heavy chain CG17927-PA, isoform A [Drosophila melanogaster]	gi|24584704,gi|28574239	224698	1	128	186	2330	0.0109	0.549	KCNETLDTQQK	K	R	0.95	79	36.4	0	0	7	1	2	1364.65	441	451	TRUE	gi|24584700,gi|24584706,gi|24584710,gi|24584702,gi|24584712,gi|24584698
Myosin heavy chain CG17927-PA, isoform A [Drosophila melanogaster]	gi|24584704,gi|28574239	224698	1	128	186	2330	0.0109	0.549	KDLLQQVNPPK	K	Y	0.95	43.8	36.4	0	0	1	1	2	1279.74	74	84	TRUE	gi|24584700,gi|24584706,gi|24584710,gi|24584702,gi|24584712
Myosin heavy chain CG17927-PA, isoform A [Drosophila melanogaster]	gi|24584704,gi|28574239	224698	1	128	186	2330	0.0109	0.549	KELEALNAK	R	L	0.95	46.7	37.3	0	0	1	0	2	1015.58	870	878	TRUE	gi|24584700,gi|24584706,gi|24584710,gi|24584702,gi|24584712,gi|24584698
Myosin heavy chain CG17927-PA, isoform A [Drosophila melanogaster]	gi|24584704,gi|28574239	224698	1	128	186	2330	0.0109	0.549	KGGGFATVSSAYK	K	E	0.95	54	36.9	2.62	0	2	1	2	1272.66	641	653	TRUE	gi|24584700,gi|24584706,gi|24584710,gi|24584702,gi|24584712,gi|24584698
Myosin heavy chain CG17927-PA, isoform A [Drosophila melanogaster]	gi|24584704,gi|28574239	224698	1	128	186	2330	0.0109	0.549	KHNDAVAEMAEQVDQLNK	K	L	0.95	84.3	36.4	3.08	0	0	4	2	2055.98	1194	1211	TRUE	gi|24584700,gi|24584706,gi|24584710,gi|24584702,gi|24584712,gi|24584698
Myosin heavy chain CG17927-PA, isoform A [Drosophila melanogaster]	gi|24584704,gi|28574239	224698	1	128	186	2330	0.0109	0.549	KLEADINELEIALDHANK	K	A	0.95	33.9	36.3	0	0	0	1	2	2036.07	1616	1633	TRUE	gi|24584700,gi|24584706,gi|24584710,gi|24584702,gi|24584712,gi|24584698
Myosin heavy chain CG17927-PA, isoform A [Drosophila melanogaster]	gi|24584704,gi|28574239	224698	1	128	186	2330	0.0109	0.549	KLSIENSDLLR	K	Q	0.95	65.2	36.9	0	0	1	4	2	1287.73	1278	1288	TRUE	gi|24584700,gi|24584706,gi|24584710,gi|24584702,gi|24584712,gi|24584698
Myosin heavy chain CG17927-PA, isoform A [Drosophila melanogaster]	gi|24584704,gi|28574239	224698	1	128	186	2330	0.0109	0.549	LADELR	R	A	0.95	41.8	38.4	0	0	2	0	2	716.394	1764	1769	TRUE	gi|24584700,gi|24584706,gi|24584710,gi|24584702,gi|24584712,gi|24584698
Myosin heavy chain CG17927-PA, isoform A [Drosophila melanogaster]	gi|24584704,gi|28574239	224698	1	128	186	2330	0.0109	0.549	LAEAEETIESLNQK	R	C	0.95	127	36.5	0	0	63	4	2	1574.79	1396	1409	TRUE	gi|24584700,gi|24584706,gi|24584710,gi|24584702,gi|24584712,gi|24584698
Myosin heavy chain CG17927-PA, isoform A [Drosophila melanogaster]	gi|24584704,gi|28574239	224698	1	128	186	2330	0.0109	0.549	LAGADIETYLLEK	K	A	0.95	107	36.6	0	0	27	0	2	1435.77	257	269	TRUE	gi|24584700,gi|24584706,gi|24584710,gi|24584702,gi|24584712,gi|24584698
Myosin heavy chain CG17927-PA, isoform A [Drosophila melanogaster]	gi|24584704,gi|28574239	224698	1	128	186	2330	0.0109	0.549	LDEAEANALK	R	G	0.95	83.1	37.3	0	0	26	0	2	1073.55	1796	1805	TRUE	gi|24584700,gi|24584706,gi|24584710,gi|24584702,gi|24584712,gi|24584698
Myosin heavy chain CG17927-PA, isoform A [Drosophila melanogaster]	gi|24584704,gi|28574239	224698	1	128	186	2330	0.0109	0.549	LEADINELEIALDHANK	K	A	0.95	61.4	36.5	2.62	0	0	2	2	1907.97	1617	1633	TRUE	gi|24584700,gi|24584706,gi|24584710,gi|24584702,gi|24584712,gi|24584698
Myosin heavy chain CG17927-PA, isoform A [Drosophila melanogaster]	gi|24584704,gi|28574239	224698	1	128	186	2330	0.0109	0.549	LEDEQVVVLK	K	H	0.95	89.2	36.9	0	0	33	0	2	1171.66	1093	1102	TRUE	gi|24584700,gi|24584706,gi|24584710,gi|24584702,gi|24584712,gi|24584698
Myosin heavy chain CG17927-PA, isoform A [Drosophila melanogaster]	gi|24584704,gi|28574239	224698	1	128	186	2330	0.0109	0.549	LEEAGGATSAQIELNK	R	K	0.95	110	36.6	0	0	33	0	2	1630.83	1149	1164	TRUE	gi|24584700,gi|24584706,gi|24584710,gi|24584702,gi|24584712,gi|24584698
Myosin heavy chain CG17927-PA, isoform A [Drosophila melanogaster]	gi|24584704,gi|28574239	224698	1	128	186	2330	0.0109	0.549	LEEAGGATSAQIELNKK	R	R	0.95	76.3	36.4	0	0	2	2	2	1758.92	1149	1165	TRUE	gi|24584700,gi|24584706,gi|24584710,gi|24584702,gi|24584712,gi|24584698
Myosin heavy chain CG17927-PA, isoform A [Drosophila melanogaster]	gi|24584704,gi|28574239	224698	1	128	186	2330	0.0109	0.549	LEQTLDELEDSLER	K	E	0.95	122	36.4	0	0	34	0	2	1689.82	1026	1039	TRUE	gi|24584700,gi|24584706,gi|24584710,gi|24584702,gi|24584712,gi|24584698
Myosin heavy chain CG17927-PA, isoform A [Drosophila melanogaster]	gi|24584704,gi|28574239	224698	1	128	186	2330	0.0109	0.549	LKGAYEEGQEQLEAVR	R	R	0.95	124	36.3	0	0	3	9	2	1819.92	1483	1498	TRUE	gi|24584700,gi|24584706,gi|24584710,gi|24584702,gi|24584712,gi|24584698
Myosin heavy chain CG17927-PA, isoform A [Drosophila melanogaster]	gi|24584704,gi|28574239	224698	1	128	186	2330	0.0109	0.549	LKVDDLAAELDASQK	K	E	0.95	119	36.7	0	0	19	12	2	1615.85	1457	1471	TRUE	gi|24584700,gi|24584706,gi|24584710,gi|24584702,gi|24584712,gi|24584698
Myosin heavy chain CG17927-PA, isoform A [Drosophila melanogaster]	gi|24584704,gi|28574239	224698	1	128	186	2330	0.0109	0.549	LLQGVEK	K	D	0.95	44.5	37.4	0	0	2	0	2	786.473	730	736	TRUE	gi|24584698
Myosin heavy chain CG17927-PA, isoform A [Drosophila melanogaster]	gi|24584704,gi|28574239	224698	1	128	186	2330	0.0109	0.549	LSIENSDLLR	K	Q	0.95	106	37.3	0	1	30	0	2	1159.63	1279	1288	TRUE	gi|24584700,gi|24584706,gi|24584710,gi|24584702,gi|24584712,gi|24584698
Myosin heavy chain CG17927-PA, isoform A [Drosophila melanogaster]	gi|24584704,gi|28574239	224698	1	128	186	2330	0.0109	0.549	LSTEVEDLQLEVDR	R	A	0.95	102	36.5	0	0	18	0	2	1645.83	1420	1433	TRUE	gi|24584700,gi|24584706,gi|24584710,gi|24584702,gi|24584712,gi|24584698
Myosin heavy chain CG17927-PA, isoform A [Drosophila melanogaster]	gi|24584704,gi|28574239	224698	1	128	186	2330	0.0109	0.549	LTNTHLGK	K	S	0.95	59.3	35.5	0	0	15	0	2	883.5	551	558	TRUE	gi|24584700,gi|24584706,gi|24584710,gi|24584702,gi|24584712,gi|24584698
Myosin heavy chain CG17927-PA, isoform A [Drosophila melanogaster]	gi|24584704,gi|28574239	224698	1	128	186	2330	0.0109	0.549	LTQEAVADLER	K	N	0.95	96.7	37	0	2	76	0	2	1244.65	1060	1070	TRUE	gi|24584700,gi|24584706,gi|24584710,gi|24584702,gi|24584712,gi|24584698
Myosin heavy chain CG17927-PA, isoform A [Drosophila melanogaster]	gi|24584704,gi|28574239	224698	1	128	186	2330	0.0109	0.549	LTQEEDAR	R	N	0.95	64.1	37.5	0	0	18	0	2	961.459	925	932	TRUE	gi|24584700,gi|24584706,gi|24584710,gi|24584702,gi|24584712,gi|24584698
Myosin heavy chain CG17927-PA, isoform A [Drosophila melanogaster]	gi|24584704,gi|28574239	224698	1	128	186	2330	0.0109	0.549	MMYPDFK	R	M	0.95	45	37.2	0	0	6	0	2	947.401	714	720	TRUE	gi|24584700,gi|24584706,gi|24584710,gi|24584702,gi|24584712,gi|24584698
Myosin heavy chain CG17927-PA, isoform A [Drosophila melanogaster]	gi|24584704,gi|28574239	224698	1	128	186	2330	0.0109	0.549	MQDLVDK	R	L	0.95	38.5	37.3	0	1	4	0	2	848.419	1863	1869	TRUE	gi|24584700,gi|24584706,gi|24584710,gi|24584702,gi|24584712,gi|24584698
Myosin heavy chain CG17927-PA, isoform A [Drosophila melanogaster]	gi|24584704,gi|28574239	224698	1	128	186	2330	0.0109	0.549	MQDLVDKLQQK	R	I	0.95	44.1	36.9	0	0	3	3	2	1345.72	1863	1873	TRUE	gi|24584700,gi|24584706,gi|24584710,gi|24584702,gi|24584712,gi|24584698
Myosin heavy chain CG17927-PA, isoform A [Drosophila melanogaster]	gi|24584704,gi|28574239	224698	1	128	186	2330	0.0109	0.549	NDLENQLR	K	D	0.95	54.2	37.5	0	0	5	0	2	1001.5	912	919	TRUE	gi|24584700,gi|24584706,gi|24584710,gi|24584702,gi|24584712,gi|24584698
Myosin heavy chain CG17927-PA, isoform A [Drosophila melanogaster]	gi|24584704,gi|28574239	224698	1	128	186	2330	0.0109	0.549	NEYYGQLNDLR	K	A	0.95	69.6	36.7	0	0	18	0	2	1384.65	1221	1231	TRUE	gi|24584700,gi|24584706,gi|24584702,gi|24584698
Myosin heavy chain CG17927-PA, isoform A [Drosophila melanogaster]	gi|24584704,gi|28574239	224698	1	128	186	2330	0.0109	0.549	NKDPLNDTVVDQFK	K	K	0.95	89.1	36.6	0	0	41	11	2	1632.82	597	610	TRUE	gi|24584700,gi|24584706,gi|24584710,gi|24584702,gi|24584712,gi|24584698
Myosin heavy chain CG17927-PA, isoform A [Drosophila melanogaster]	gi|24584704,gi|28574239	224698	1	128	186	2330	0.0109	0.549	NKDPLNDTVVDQFKK	K	S	0.95	96.6	36.4	0	0	8	0	2	1760.92	597	611	TRUE	gi|24584700,gi|24584706,gi|24584710,gi|24584702,gi|24584712,gi|24584698
Myosin heavy chain CG17927-PA, isoform A [Drosophila melanogaster]	gi|24584704,gi|28574239	224698	1	128	186	2330	0.0109	0.549	NLADEVK	K	D	0.95	40.6	38.1	0	1	1	0	2	788.415	1503	1509	TRUE	gi|24584700,gi|24584706,gi|24584710,gi|24584702,gi|24584712,gi|24584698
Myosin heavy chain CG17927-PA, isoform A [Drosophila melanogaster]	gi|24584704,gi|28574239	224698	1	128	186	2330	0.0109	0.549	NLEHDLDNLR	R	E	0.95	48.6	36	0	0	14	16	2	1238.61	1334	1343	TRUE	gi|24584700,gi|24584706,gi|24584710,gi|24584702,gi|24584712,gi|24584698
Myosin heavy chain CG17927-PA, isoform A [Drosophila melanogaster]	gi|24584704,gi|28574239	224698	1	128	186	2330	0.0109	0.549	NLNDEIAHQDELINK	R	L	0.95	115	36.5	0	0	42	11	2	1765.87	976	990	TRUE	gi|24584700,gi|24584706,gi|24584710,gi|24584702,gi|24584712,gi|24584698
Myosin heavy chain CG17927-PA, isoform A [Drosophila melanogaster]	gi|24584704,gi|28574239	224698	1	128	186	2330	0.0109	0.549	NVQQVTNSIGALCK	R	G	0.95	113	36.7	0	1	72	3	2	1531.79	415	428	TRUE	gi|24584700,gi|24584706,gi|24584710,gi|24584702,gi|24584712,gi|24584698
Myosin heavy chain CG17927-PA, isoform A [Drosophila melanogaster]	gi|24584704,gi|28574239	224698	1	128	186	2330	0.0109	0.549	NYSTELFR	R	L	0.95	52	37.2	0	0	9	0	2	1029.5	1475	1482	TRUE	gi|24584700,gi|24584706,gi|24584710,gi|24584702,gi|24584712,gi|24584698
Myosin heavy chain CG17927-PA, isoform A [Drosophila melanogaster]	gi|24584704,gi|28574239	224698	1	128	186	2330	0.0109	0.549	PKPVANQEDEDPTPYLFVSLEQR	M	R	0.95	60.5	35.8	0	0	0	2	2	2672.32	2	24	TRUE	gi|24584700,gi|24584706,gi|24584710,gi|24584702,gi|24584712,gi|24584698
Myosin heavy chain CG17927-PA, isoform A [Drosophila melanogaster]	gi|24584704,gi|28574239	224698	1	128	186	2330	0.0109	0.549	QAEQELADAHEQLNEVSAQNASISAAK	R	R	0.95	104	35.5	0	0	6	45	2	2852.37	1700	1726	TRUE	gi|24584700,gi|24584706,gi|24584710,gi|24584702,gi|24584712,gi|24584698
Myosin heavy chain CG17927-PA, isoform A [Drosophila melanogaster]	gi|24584704,gi|28574239	224698	1	128	186	2330	0.0109	0.549	QIEEAEEIAALNLAK	R	F	0.95	117	36.5	0	0	27	9	2	1641.87	1880	1894	TRUE	gi|24584700,gi|24584706,gi|24584710,gi|24584702,gi|24584712,gi|24584698
Myosin heavy chain CG17927-PA, isoform A [Drosophila melanogaster]	gi|24584704,gi|28574239	224698	1	128	186	2330	0.0109	0.549	QLEEAESQVSQLSK	R	I	0.95	119	36.5	0	0	67	0	2	1575.79	1289	1302	TRUE	gi|24584700,gi|24584706,gi|24584710,gi|24584702,gi|24584712,gi|24584698
Myosin heavy chain CG17927-PA, isoform A [Drosophila melanogaster]	gi|24584704,gi|28574239	224698	1	128	186	2330	0.0109	0.549	QLQHTLNEVQSK	K	L	0.95	75.6	36.3	0	0	14	13	2	1424.75	1250	1261	TRUE	gi|24584700,gi|24584706,gi|24584710,gi|24584702,gi|24584712,gi|24584698
Myosin heavy chain CG17927-PA, isoform A [Drosophila melanogaster]	gi|24584704,gi|28574239	224698	1	128	186	2330	0.0109	0.549	RANALQNELEESR	R	T	0.95	66.2	36.7	0	0	13	4	2	1529.77	1676	1688	TRUE	gi|24584700,gi|24584706,gi|24584710,gi|24584702,gi|24584712,gi|24584698
Myosin heavy chain CG17927-PA, isoform A [Drosophila melanogaster]	gi|24584704,gi|28574239	224698	1	128	186	2330	0.0109	0.549	RDLEEANIQHESTLANLR	R	K	0.95	42	36.1	1.49	0	0	1	2	2109.07	1175	1192	TRUE	gi|24584700,gi|24584706,gi|24584710,gi|24584702,gi|24584712,gi|24584698
Myosin heavy chain CG17927-PA, isoform A [Drosophila melanogaster]	gi|24584704,gi|28574239	224698	1	128	186	2330	0.0109	0.549	RQIEEAEEIAALNLAK	K	F	0.95	57	36.6	0	0	1	0	2	1797.97	1879	1894	TRUE	gi|24584700,gi|24584706,gi|24584710,gi|24584702,gi|24584712,gi|24584698
Myosin heavy chain CG17927-PA, isoform A [Drosophila melanogaster]	gi|24584704,gi|28574239	224698	1	128	186	2330	0.0109	0.549	SCWIPDEK	K	E	0.95	39.4	36.7	0	0	8	0	2	1034.46	37	44	TRUE	gi|24584700,gi|24584706,gi|24584710,gi|24584702,gi|24584712,gi|24584698
Myosin heavy chain CG17927-PA, isoform A [Drosophila melanogaster]	gi|24584704,gi|28574239	224698	1	128	186	2330	0.0109	0.549	SEELEEAK	R	R	0.95	44.5	37.2	0	0	2	0	2	934.437	1382	1389	TRUE	gi|24584700,gi|24584706,gi|24584710,gi|24584702,gi|24584712,gi|24584698
Myosin heavy chain CG17927-PA, isoform A [Drosophila melanogaster]	gi|24584704,gi|28574239	224698	1	128	186	2330	0.0109	0.549	SEELEEAKR	R	K	0.95	67.6	37.2	0	0	10	5	2	1090.54	1382	1390	TRUE	gi|24584700,gi|24584706,gi|24584710,gi|24584702,gi|24584712,gi|24584698
Myosin heavy chain CG17927-PA, isoform A [Drosophila melanogaster]	gi|24584704,gi|28574239	224698	1	128	186	2330	0.0109	0.549	SKGSLEDQVVQTNPVLEAFGNAK	K	T	0.95	90.2	35.9	0	0	1	7	2	2431.25	211	233	TRUE	gi|24584700,gi|24584706,gi|24584710,gi|24584702,gi|24584712,gi|24584698
Myosin heavy chain CG17927-PA, isoform A [Drosophila melanogaster]	gi|24584704,gi|28574239	224698	1	128	186	2330	0.0109	0.549	SKYESDGVAR	R	S	0.95	61	36.2	0	0	11	8	2	1111.54	1372	1381	TRUE	gi|24584700,gi|24584706,gi|24584710,gi|24584702,gi|24584712,gi|24584698
Myosin heavy chain CG17927-PA, isoform A [Drosophila melanogaster]	gi|24584704,gi|28574239	224698	1	128	186	2330	0.0109	0.549	TALLDSLSGEK	K	G	0.95	76.3	36.9	0	5	18	0	2	1133.61	884	894	TRUE	gi|24584700,gi|24584706,gi|24584710,gi|24584702,gi|24584712,gi|24584698
Myosin heavy chain CG17927-PA, isoform A [Drosophila melanogaster]	gi|24584704,gi|28574239	224698	1	128	186	2330	0.0109	0.549	TGEELQAAEDK	K	I	0.95	93.6	37.2	0	0	9	0	2	1190.55	1005	1015	TRUE	gi|24584700,gi|24584706,gi|24584710,gi|24584702,gi|24584712,gi|24584698
Myosin heavy chain CG17927-PA, isoform A [Drosophila melanogaster]	gi|24584704,gi|28574239	224698	1	128	186	2330	0.0109	0.549	TGEELQAAEDKINHLNK	K	V	0.95	76.5	36.4	0	0	9	9	2	1909.96	1005	1021	TRUE	gi|24584700,gi|24584706,gi|24584710,gi|24584702,gi|24584712,gi|24584698
Myosin heavy chain CG17927-PA, isoform A [Drosophila melanogaster]	gi|24584704,gi|28574239	224698	1	128	186	2330	0.0109	0.549	TLLEQADR	R	G	0.95	54.7	37.7	0	1	6	0	2	945.501	1689	1696	TRUE	gi|24584700,gi|24584706,gi|24584710,gi|24584702,gi|24584712,gi|24584698
Myosin heavy chain CG17927-PA, isoform A [Drosophila melanogaster]	gi|24584704,gi|28574239	224698	1	128	186	2330	0.0109	0.549	VDDLAAELDASQK	K	E	0.95	121	36.8	0	0	25	3	2	1374.68	1459	1471	TRUE	gi|24584700,gi|24584706,gi|24584710,gi|24584702,gi|24584712,gi|24584698
Myosin heavy chain CG17927-PA, isoform A [Drosophila melanogaster]	gi|24584704,gi|28574239	224698	1	128	186	2330	0.0109	0.549	VEGDLKLTQEAVADLER	K	N	0.95	39.8	36.5	0	0	0	1	2	1885.99	1054	1070	TRUE	gi|24584700,gi|24584706,gi|24584710,gi|24584702,gi|24584712,gi|24584698
Myosin heavy chain CG17927-PA, isoform A [Drosophila melanogaster]	gi|24584704,gi|28574239	224698	1	128	186	2330	0.0109	0.549	VIAYFATVGASK	K	K	0.95	97	36.7	0	0	17	0	2	1226.68	192	203	TRUE	gi|24584700,gi|24584706,gi|24584710,gi|24584702,gi|24584712,gi|24584698
Myosin heavy chain CG17927-PA, isoform A [Drosophila melanogaster]	gi|24584704,gi|28574239	224698	1	128	186	2330	0.0109	0.549	VISQQSLER	R	S	0.95	75.4	37.4	0	0	17	0	2	1059.58	272	280	TRUE	gi|24584700,gi|24584706,gi|24584710,gi|24584702,gi|24584712,gi|24584698
Myosin heavy chain CG17927-PA, isoform A [Drosophila melanogaster]	gi|24584704,gi|28574239	224698	1	128	186	2330	0.0109	0.549	VRELENELDGEQR	R	R	0.95	62.8	36.6	0	0	15	12	2	1586.78	1818	1830	TRUE	gi|24584700,gi|24584706,gi|24584710,gi|24584702,gi|24584712,gi|24584698
Myosin heavy chain CG17927-PA, isoform A [Drosophila melanogaster]	gi|24584704,gi|28574239	224698	1	128	186	2330	0.0109	0.549	YESDGVAR	K	S	0.95	59	35.5	0	0	6	0	2	896.411	1374	1381	TRUE	gi|24584700,gi|24584706,gi|24584710,gi|24584702,gi|24584712,gi|24584698
Myosin heavy chain CG17927-PA, isoform A [Drosophila melanogaster]	gi|24584704,gi|28574239	224698	1	128	186	2330	0.0109	0.549	YQQQLK	R	D	0.95	38.3	36.7	0	0	4	0	2	807.437	1645	1650	TRUE	gi|24584700,gi|24584706,gi|24584710,gi|24584702,gi|24584712,gi|24584698
bent CG32019-PA, isoform A [Drosophila melanogaster]	gi|28558739,gi|45552153	999778	1	118	128	787	0.00368	0.192	ACDWDFDVESFK	K	Y	0.95	41.3	36.8	0	0	1	0	2	1518.62	8197	8208	TRUE
bent CG32019-PA, isoform A [Drosophila melanogaster]	gi|28558739,gi|45552153	999778	1	118	128	787	0.00368	0.192	ADNLIENHDYSFR	R	V	0.95	54.5	36.6	0	0	2	0	2	1593.73	5427	5439	TRUE
bent CG32019-PA, isoform A [Drosophila melanogaster]	gi|28558739,gi|45552153	999778	1	118	128	787	0.00368	0.192	AENQYGLSDPLDIIEPIVAK	R	H	0.95	93.6	36.2	0	0	1	1	2	2185.14	7022	7041	TRUE
bent CG32019-PA, isoform A [Drosophila melanogaster]	gi|28558739,gi|45552153	999778	1	118	128	787	0.00368	0.192	AGEPVNLNIPISGAPTPTIEWK	R	R	0.95	74.9	36	0	0	2	0	2	2304.22	6176	6197	TRUE
bent CG32019-PA, isoform A [Drosophila melanogaster]	gi|28558739,gi|45552153	999778	1	118	128	787	0.00368	0.192	AGFSDPSDATEPHLAKPR	K	N	0.95	52.8	36.2	1.48	0	0	6	2	1895.93	3178	3195	TRUE
bent CG32019-PA, isoform A [Drosophila melanogaster]	gi|28558739,gi|45552153	999778	1	118	128	787	0.00368	0.192	AGNVFEFDVPVTGEPLPSK	K	D	0.95	111	36.3	0	0	10	0	2	2003.01	5287	5305	TRUE
bent CG32019-PA, isoform A [Drosophila melanogaster]	gi|28558739,gi|45552153	999778	1	118	128	787	0.00368	0.192	AGPSDPSDVSK	K	S	0.95	39.9	37.6	0	0	1	0	2	1059.5	3771	3781	TRUE
bent CG32019-PA, isoform A [Drosophila melanogaster]	gi|28558739,gi|45552153	999778	1	118	128	787	0.00368	0.192	AINAAGPGEPSDASKPIITKPR	K	K	0.95	47	36	1.51	0	0	16	2	2190.19	4362	4383	TRUE
bent CG32019-PA, isoform A [Drosophila melanogaster]	gi|28558739,gi|45552153	999778	1	118	128	787	0.00368	0.192	AINEEGESDPLDSDDSIIAK	K	N	0.95	149	36.3	0	0	25	0	2	2117.97	3073	3092	TRUE
bent CG32019-PA, isoform A [Drosophila melanogaster]	gi|28558739,gi|45552153	999778	1	118	128	787	0.00368	0.192	APEDDGGASITGYIVER	R	K	0.95	92.3	36.2	0	0	2	0	2	1749.83	4008	4024	TRUE
bent CG32019-PA, isoform A [Drosophila melanogaster]	gi|28558739,gi|45552153	999778	1	118	128	787	0.00368	0.192	ATIPDLVEGQTYK	K	F	0.95	50.5	36.6	0	0	7	0	2	1434.75	4934	4946	TRUE
bent CG32019-PA, isoform A [Drosophila melanogaster]	gi|28558739,gi|45552153	999778	1	118	128	787	0.00368	0.192	ATVPTLNENCEYEFR	K	V	0.95	84.6	36.3	0	0	17	0	2	1842.83	4345	4359	TRUE
bent CG32019-PA, isoform A [Drosophila melanogaster]	gi|28558739,gi|45552153	999778	1	118	128	787	0.00368	0.192	AVDLTDWDKDHADLK	K	W	0.95	34.1	36.4	0	0	0	2	2	1741.84	2205	2219	TRUE
bent CG32019-PA, isoform A [Drosophila melanogaster]	gi|28558739,gi|45552153	999778	1	118	128	787	0.00368	0.192	AVNAIGESDPLEAVNTIIAK	K	N	0.95	141	36.2	0	0	14	0	2	2025.09	5736	5755	TRUE
bent CG32019-PA, isoform A [Drosophila melanogaster]	gi|28558739,gi|45552153	999778	1	118	128	787	0.00368	0.192	AVNAIGQSDPATFK	R	N	0.95	66	36.6	0	0	12	0	2	1418.73	2175	2188	TRUE
bent CG32019-PA, isoform A [Drosophila melanogaster]	gi|28558739,gi|45552153	999778	1	118	128	787	0.00368	0.192	AVNEEGESEPLETESAITAK	K	N	0.95	141	36.4	0	0	17	0	2	2103.99	3370	3389	TRUE
bent CG32019-PA, isoform A [Drosophila melanogaster]	gi|28558739,gi|45552153	999778	1	118	128	787	0.00368	0.192	AVNSEGESEPLVTDIPTK	K	A	0.95	120	36.5	0	0	27	0	2	1885.94	3961	3978	TRUE
bent CG32019-PA, isoform A [Drosophila melanogaster]	gi|28558739,gi|45552153	999778	1	118	128	787	0.00368	0.192	DDGGEPVESYLVEK	K	F	0.95	40.3	36.2	0	0	1	0	2	1536.71	4507	4520	TRUE
bent CG32019-PA, isoform A [Drosophila melanogaster]	gi|28558739,gi|45552153	999778	1	118	128	787	0.00368	0.192	DDGGIPITGYVIEK	K	M	0.95	47.1	36.4	0	0	2	0	2	1476.76	3319	3332	TRUE
bent CG32019-PA, isoform A [Drosophila melanogaster]	gi|28558739,gi|45552153	999778	1	118	128	787	0.00368	0.192	DDGGSEITHYVVEK	K	M	0.95	42	36.7	0	0	4	0	2	1548.72	5393	5406	TRUE
bent CG32019-PA, isoform A [Drosophila melanogaster]	gi|28558739,gi|45552153	999778	1	118	128	787	0.00368	0.192	DGENIESGGHYTVEVK	R	E	0.95	60.8	36.4	0	0	3	1	2	1733.8	7777	7792	TRUE
bent CG32019-PA, isoform A [Drosophila melanogaster]	gi|28558739,gi|45552153	999778	1	118	128	787	0.00368	0.192	DGGSPITNYIIEVMDK	R	D	0.95	54.5	36.3	0	0	1	0	2	1767.85	3421	3436	TRUE
bent CG32019-PA, isoform A [Drosophila melanogaster]	gi|28558739,gi|45552153	999778	1	118	128	787	0.00368	0.192	DITTTFDGTTAR	K	L	0.95	73.7	36.6	0	0	6	0	2	1298.62	789	800	TRUE
bent CG32019-PA, isoform A [Drosophila melanogaster]	gi|28558739,gi|45552153	999778	1	118	128	787	0.00368	0.192	DMTVIAGDEFR	R	I	0.95	62.9	36.4	0	0	1	0	2	1253.58	6862	6872	TRUE
bent CG32019-PA, isoform A [Drosophila melanogaster]	gi|28558739,gi|45552153	999778	1	118	128	787	0.00368	0.192	DPFDEPNKPGTPEVTDYDNQSISLK	K	W	0.95	71	35.9	4.8	0	0	3	2	2806.31	2793	2817	TRUE
bent CG32019-PA, isoform A [Drosophila melanogaster]	gi|28558739,gi|45552153	999778	1	118	128	787	0.00368	0.192	DPYSHPDKPGQPQATDWGK	K	H	0.95	39.7	36.2	0	0	0	2	2	2123.98	5462	5480	TRUE
bent CG32019-PA, isoform A [Drosophila melanogaster]	gi|28558739,gi|45552153	999778	1	118	128	787	0.00368	0.192	DSVLDDAGLYR	K	C	0.95	43.2	36	0	0	1	0	2	1223.59	1791	1801	TRUE
bent CG32019-PA, isoform A [Drosophila melanogaster]	gi|28558739,gi|45552153	999778	1	118	128	787	0.00368	0.192	DYTLQCAASGKPSPTAR	K	W	0.95	36.1	36.5	0	0	1	3	2	1822.88	7267	7283	TRUE
bent CG32019-PA, isoform A [Drosophila melanogaster]	gi|28558739,gi|45552153	999778	1	118	128	787	0.00368	0.192	EEVVFLNVQPLPK	R	E	0.95	85.6	36.3	0	0	6	0	2	1511.85	8391	8403	TRUE
bent CG32019-PA, isoform A [Drosophila melanogaster]	gi|28558739,gi|45552153	999778	1	118	128	787	0.00368	0.192	EGESEDLETEKPIIAK	K	N	0.95	71.9	36.7	0	0	9	1	2	1787.89	3670	3685	TRUE
bent CG32019-PA, isoform A [Drosophila melanogaster]	gi|28558739,gi|45552153	999778	1	118	128	787	0.00368	0.192	EGESEPLETFDAIVAR	K	N	0.95	97	36.5	0	0	18	0	2	1762.85	2477	2492	TRUE
bent CG32019-PA, isoform A [Drosophila melanogaster]	gi|28558739,gi|45552153	999778	1	118	128	787	0.00368	0.192	EGESEPLETLGSIIAK	K	D	0.95	102	36.6	0	0	24	0	2	1672.86	4560	4575	TRUE
bent CG32019-PA, isoform A [Drosophila melanogaster]	gi|28558739,gi|45552153	999778	1	118	128	787	0.00368	0.192	ESSVELQDSAGHEVPEPK	K	K	0.95	47.1	36.4	0	0	0	1	2	1937.91	910	927	TRUE
bent CG32019-PA, isoform A [Drosophila melanogaster]	gi|28558739,gi|45552153	999778	1	118	128	787	0.00368	0.192	ETELTSTGQVR	K	L	0.95	95.2	36.7	0	0	3	0	2	1220.61	3237	3247	TRUE
bent CG32019-PA, isoform A [Drosophila melanogaster]	gi|28558739,gi|45552153	999778	1	118	128	787	0.00368	0.192	FDPDTGIWLPVGR	K	S	0.95	74.7	36.5	0	0	7	0	2	1472.75	4521	4533	TRUE
bent CG32019-PA, isoform A [Drosophila melanogaster]	gi|28558739,gi|45552153	999778	1	118	128	787	0.00368	0.192	FLAPFFDK	R	S	0.95	43.8	36.1	0	0	3	0	2	984.52	5564	5571	TRUE
bent CG32019-PA, isoform A [Drosophila melanogaster]	gi|28558739,gi|45552153	999778	1	118	128	787	0.00368	0.192	FNGEPIVPSESIEIK	K	N	0.95	47.7	36.5	0	0	1	0	2	1658.86	1944	1958	TRUE
bent CG32019-PA, isoform A [Drosophila melanogaster]	gi|28558739,gi|45552153	999778	1	118	128	787	0.00368	0.192	FSGPISAPVLLEVPFK	K	V	0.95	84.2	36.5	0	0	2	0	2	1700.96	2010	2025	TRUE
bent CG32019-PA, isoform A [Drosophila melanogaster]	gi|28558739,gi|45552153	999778	1	118	128	787	0.00368	0.192	FSNDWVSGK	K	E	0.95	36.4	35.9	0	0	1	0	2	1039.48	2242	2250	TRUE
bent CG32019-PA, isoform A [Drosophila melanogaster]	gi|28558739,gi|45552153	999778	1	118	128	787	0.00368	0.192	FTSMAVSGLTPGK	R	E	0.95	56.8	36.2	0	0	2	0	2	1295.67	7888	7900	TRUE
bent CG32019-PA, isoform A [Drosophila melanogaster]	gi|28558739,gi|45552153	999778	1	118	128	787	0.00368	0.192	FVPQPVEISQQSVYDR	K	Y	0.95	106	36.4	0	0	7	0	2	1891.96	7970	7985	TRUE
bent CG32019-PA, isoform A [Drosophila melanogaster]	gi|28558739,gi|45552153	999778	1	118	128	787	0.00368	0.192	FYFDGLIGK	R	R	0.95	57.3	37.4	0	0	2	0	2	1059.55	6162	6170	TRUE
bent CG32019-PA, isoform A [Drosophila melanogaster]	gi|28558739,gi|45552153	999778	1	118	128	787	0.00368	0.192	GDQYYIKLELLDPQLEDSGLYK	R	C	0.95	45.6	36	2.7	0	0	3	2	2600.31	594	615	TRUE
bent CG32019-PA, isoform A [Drosophila melanogaster]	gi|28558739,gi|45552153	999778	1	118	128	787	0.00368	0.192	GEAVSQIVNLVDIPEEER	K	K	0.95	102	36.2	0	0	2	0	2	1997.02	721	738	TRUE
bent CG32019-PA, isoform A [Drosophila melanogaster]	gi|28558739,gi|45552153	999778	1	118	128	787	0.00368	0.192	GEPAPSLTWFLK	K	E	0.95	46.1	37	0	0	4	0	2	1345.72	3225	3236	TRUE
bent CG32019-PA, isoform A [Drosophila melanogaster]	gi|28558739,gi|45552153	999778	1	118	128	787	0.00368	0.192	GEPAPVITWYQNDK	R	E	0.95	73.3	36.7	0	0	3	0	2	1617.79	2925	2938	TRUE
bent CG32019-PA, isoform A [Drosophila melanogaster]	gi|28558739,gi|45552153	999778	1	118	128	787	0.00368	0.192	GGPSDPSDPSSTIICKPR	R	F	0.95	50.3	36.4	2.1	0	4	9	2	1870.9	5546	5563	TRUE
bent CG32019-PA, isoform A [Drosophila melanogaster]	gi|28558739,gi|45552153	999778	1	118	128	787	0.00368	0.192	GPLAVSDVTASGCK	K	L	0.95	81.4	36.6	0	0	7	0	2	1361.67	2699	2712	TRUE
bent CG32019-PA, isoform A [Drosophila melanogaster]	gi|28558739,gi|45552153	999778	1	118	128	787	0.00368	0.192	GPLQVNDITK	K	H	0.95	54	36.7	0	0	9	0	2	1084.6	3596	3605	TRUE
bent CG32019-PA, isoform A [Drosophila melanogaster]	gi|28558739,gi|45552153	999778	1	118	128	787	0.00368	0.192	GVAEDFAPSFVK	M	K	0.95	77.9	36.3	0	0	10	0	2	1266.64	2	13	TRUE
bent CG32019-PA, isoform A [Drosophila melanogaster]	gi|28558739,gi|45552153	999778	1	118	128	787	0.00368	0.192	GVSEILEGGR	K	F	0.95	71.8	37.5	0	0	4	0	2	1016.54	1530	1539	TRUE
bent CG32019-PA, isoform A [Drosophila melanogaster]	gi|28558739,gi|45552153	999778	1	118	128	787	0.00368	0.192	HDGGSPITGYIIEK	K	R	0.95	64.6	36.7	0	0	4	0	2	1486.75	6776	6789	TRUE
bent CG32019-PA, isoform A [Drosophila melanogaster]	gi|28558739,gi|45552153	999778	1	118	128	787	0.00368	0.192	HLTDDAASVVVK	K	N	0.95	69.1	36.4	0	0	8	0	2	1254.67	6607	6618	TRUE
bent CG32019-PA, isoform A [Drosophila melanogaster]	gi|28558739,gi|45552153	999778	1	118	128	787	0.00368	0.192	ICLDQLER	R	N	0.95	40.6	37.2	0	0	1	0	2	1046.53	2349	2356	TRUE
bent CG32019-PA, isoform A [Drosophila melanogaster]	gi|28558739,gi|45552153	999778	1	118	128	787	0.00368	0.192	IFADNVYGR	R	S	0.95	62.5	35.9	0	0	4	0	2	1054.53	7906	7914	TRUE
bent CG32019-PA, isoform A [Drosophila melanogaster]	gi|28558739,gi|45552153	999778	1	118	128	787	0.00368	0.192	IFAQNVAGLSTESSASQAVK	R	I	0.95	104	36.2	0	0	10	0	2	2008.04	7616	7635	TRUE
bent CG32019-PA, isoform A [Drosophila melanogaster]	gi|28558739,gi|45552153	999778	1	118	128	787	0.00368	0.192	IFYSGDQPLTVILK	K	K	0.95	80.4	36.6	0	0	10	0	2	1593.89	7366	7379	TRUE
bent CG32019-PA, isoform A [Drosophila melanogaster]	gi|28558739,gi|45552153	999778	1	118	128	787	0.00368	0.192	INGQPVPTAEYQDDR	K	V	0.95	61.7	36.6	0	0	4	0	2	1702.8	6108	6122	TRUE
bent CG32019-PA, isoform A [Drosophila melanogaster]	gi|28558739,gi|45552153	999778	1	118	128	787	0.00368	0.192	INIEQISEGDPK	R	E	0.95	58.9	37.1	0	0	1	0	2	1342.69	879	890	TRUE
bent CG32019-PA, isoform A [Drosophila melanogaster]	gi|28558739,gi|45552153	999778	1	118	128	787	0.00368	0.192	IPNLIENAEYEFR	K	V	0.95	64.4	36.5	0	0	2	0	2	1607.81	6812	6824	TRUE
bent CG32019-PA, isoform A [Drosophila melanogaster]	gi|28558739,gi|45552153	999778	1	118	128	787	0.00368	0.192	ISIIETVR	K	K	0.95	52.4	37.5	0	0	2	0	2	930.562	2960	2967	TRUE
bent CG32019-PA, isoform A [Drosophila melanogaster]	gi|28558739,gi|45552153	999778	1	118	128	787	0.00368	0.192	ITTGTAEFAAPEIVNR	K	E	0.95	90.3	36.3	0	0	13	0	2	1689.88	8142	8157	TRUE
bent CG32019-PA, isoform A [Drosophila melanogaster]	gi|28558739,gi|45552153	999778	1	118	128	787	0.00368	0.192	KDEVFTGSK	R	F	0.95	47.9	35.9	0	0	1	0	2	1010.52	1673	1681	TRUE
bent CG32019-PA, isoform A [Drosophila melanogaster]	gi|28558739,gi|45552153	999778	1	118	128	787	0.00368	0.192	KPEDDGGVPIK	K	E	0.95	54.3	36.2	0	0	2	0	2	1154.61	2717	2727	TRUE
bent CG32019-PA, isoform A [Drosophila melanogaster]	gi|28558739,gi|45552153	999778	1	118	128	787	0.00368	0.192	KPQLHQEDDGNR	K	L	0.95	46.4	36.2	0	0	0	4	2	1436.69	14	25	TRUE
bent CG32019-PA, isoform A [Drosophila melanogaster]	gi|28558739,gi|45552153	999778	1	118	128	787	0.00368	0.192	LDANITGEPAPK	K	V	0.95	76.3	36.2	0	0	10	0	2	1225.64	4702	4713	TRUE
bent CG32019-PA, isoform A [Drosophila melanogaster]	gi|28558739,gi|45552153	999778	1	118	128	787	0.00368	0.192	LEINDVEESDK	K	G	0.95	61.5	36.9	0	0	5	0	2	1290.61	699	709	TRUE
bent CG32019-PA, isoform A [Drosophila melanogaster]	gi|28558739,gi|45552153	999778	1	118	128	787	0.00368	0.192	LELLDPQLEDSGLYK	K	C	0.95	102	36.6	0	0	7	0	2	1732.9	601	615	TRUE
bent CG32019-PA, isoform A [Drosophila melanogaster]	gi|28558739,gi|45552153	999778	1	118	128	787	0.00368	0.192	LENDDSNYNIDMESYR	R	T	0.95	108	36.2	0	0	5	0	2	1977.81	4128	4143	TRUE
bent CG32019-PA, isoform A [Drosophila melanogaster]	gi|28558739,gi|45552153	999778	1	118	128	787	0.00368	0.192	LIDFGLATR	K	L	0.95	56.2	37	0	0	3	0	2	1005.57	8125	8133	TRUE
bent CG32019-PA, isoform A [Drosophila melanogaster]	gi|28558739,gi|45552153	999778	1	118	128	787	0.00368	0.192	LSEYSSLR	R	K	0.95	33.8	35.8	0	0	1	0	2	954.49	8281	8288	TRUE
bent CG32019-PA, isoform A [Drosophila melanogaster]	gi|28558739,gi|45552153	999778	1	118	128	787	0.00368	0.192	NPFDEPGKPENLK	R	A	0.95	60.8	36.6	0	0	2	0	2	1484.74	4871	4883	TRUE
bent CG32019-PA, isoform A [Drosophila melanogaster]	gi|28558739,gi|45552153	999778	1	118	128	787	0.00368	0.192	NPFDVPTKPGTPTIK	K	D	0.95	58.1	36.4	0	0	6	0	2	1611.88	5167	5181	TRUE
bent CG32019-PA, isoform A [Drosophila melanogaster]	gi|28558739,gi|45552153	999778	1	118	128	787	0.00368	0.192	NPYDPPSPPSQPVIDDYDNK	R	S	0.95	97.8	36.3	0	0	4	0	2	2258.03	2493	2512	TRUE
bent CG32019-PA, isoform A [Drosophila melanogaster]	gi|28558739,gi|45552153	999778	1	118	128	787	0.00368	0.192	NTSGFDTATINVR	K	V	0.95	88.3	36.6	0	0	12	0	2	1395.69	6634	6646	TRUE
bent CG32019-PA, isoform A [Drosophila melanogaster]	gi|28558739,gi|45552153	999778	1	118	128	787	0.00368	0.192	NTTTIPELTEGQEYEFR	K	V	0.95	96.8	36.3	0	0	4	0	2	2027.96	5818	5834	TRUE
bent CG32019-PA, isoform A [Drosophila melanogaster]	gi|28558739,gi|45552153	999778	1	118	128	787	0.00368	0.192	NVTIETPDYYTK	K	L	0.95	55.1	36.8	0	0	5	0	2	1443.7	4728	4739	TRUE
bent CG32019-PA, isoform A [Drosophila melanogaster]	gi|28558739,gi|45552153	999778	1	118	128	787	0.00368	0.192	QGQSQPLTTSQPITAK	K	D	0.95	41	36.5	0	0	1	0	2	1684.89	5446	5461	TRUE
bent CG32019-PA, isoform A [Drosophila melanogaster]	gi|28558739,gi|45552153	999778	1	118	128	787	0.00368	0.192	QGTSEPLTTAQAIIAK	R	N	0.95	60.1	36.6	0	0	13	0	2	1628.89	5151	5166	TRUE
bent CG32019-PA, isoform A [Drosophila melanogaster]	gi|28558739,gi|45552153	999778	1	118	128	787	0.00368	0.192	QIDGFAPTFAK	K	K	0.95	39.2	36.2	0	0	1	0	2	1194.62	113	123	TRUE
bent CG32019-PA, isoform A [Drosophila melanogaster]	gi|28558739,gi|45552153	999778	1	118	128	787	0.00368	0.192	RPDDDGGCEISGYALER	K	M	0.95	46.6	36.4	0	0	1	0	2	1909.84	2419	2435	TRUE
bent CG32019-PA, isoform A [Drosophila melanogaster]	gi|28558739,gi|45552153	999778	1	118	128	787	0.00368	0.192	SDASDTSTLIK	R	T	0.95	34.9	36	0	0	2	0	2	1137.56	7915	7925	TRUE
bent CG32019-PA, isoform A [Drosophila melanogaster]	gi|28558739,gi|45552153	999778	1	118	128	787	0.00368	0.192	SDGGAPISEYIIQK	K	K	0.95	82.6	36.2	0	0	6	0	2	1477.75	5786	5799	TRUE
bent CG32019-PA, isoform A [Drosophila melanogaster]	gi|28558739,gi|45552153	999778	1	118	128	787	0.00368	0.192	SDGGAPISGYIIEK	R	K	0.95	77.7	36.4	0	0	10	0	2	1406.72	3123	3136	TRUE
bent CG32019-PA, isoform A [Drosophila melanogaster]	gi|28558739,gi|45552153	999778	1	118	128	787	0.00368	0.192	SDGPEYNVDGLVPGHDYK	R	F	0.95	51	36.2	0	0	1	7	2	1961.89	4534	4551	TRUE
bent CG32019-PA, isoform A [Drosophila melanogaster]	gi|28558739,gi|45552153	999778	1	118	128	787	0.00368	0.192	SDPLTSDQPVVAK	R	S	0.95	73	37.2	0	0	11	0	2	1356.7	6041	6053	TRUE
bent CG32019-PA, isoform A [Drosophila melanogaster]	gi|28558739,gi|45552153	999778	1	118	128	787	0.00368	0.192	SDSGEYLVTATNTSGK	R	D	0.95	103	36.6	0	0	24	0	2	1629.76	4748	4763	TRUE
bent CG32019-PA, isoform A [Drosophila melanogaster]	gi|28558739,gi|45552153	999778	1	118	128	787	0.00368	0.192	SDTGVYTLTAR	R	N	0.95	53.2	36.6	0	0	3	0	2	1183.6	5339	5349	TRUE
bent CG32019-PA, isoform A [Drosophila melanogaster]	gi|28558739,gi|45552153	999778	1	118	128	787	0.00368	0.192	SLLNDITVHAGK	K	R	0.95	52.5	36.4	0	0	1	0	2	1267.7	5572	5583	TRUE
bent CG32019-PA, isoform A [Drosophila melanogaster]	gi|28558739,gi|45552153	999778	1	118	128	787	0.00368	0.192	STEPQVDVTGLSPGNEYK	R	F	0.95	87.8	36.2	0	0	19	0	2	1920.92	4829	4846	TRUE
bent CG32019-PA, isoform A [Drosophila melanogaster]	gi|28558739,gi|45552153	999778	1	118	128	787	0.00368	0.192	TDDPNPECNVEGLK	K	E	0.95	81.6	36.7	0	0	13	0	2	1587.7	2550	2563	TRUE
bent CG32019-PA, isoform A [Drosophila melanogaster]	gi|28558739,gi|45552153	999778	1	118	128	787	0.00368	0.192	TPEADVTGLTEGK	K	E	0.95	80.5	36.8	0	0	13	0	2	1317.65	3941	3953	TRUE
bent CG32019-PA, isoform A [Drosophila melanogaster]	gi|28558739,gi|45552153	999778	1	118	128	787	0.00368	0.192	TPLDDGGSPITNYVVEK	K	L	0.95	137	36.7	0	0	36	0	2	1804.9	6970	6986	TRUE
bent CG32019-PA, isoform A [Drosophila melanogaster]	gi|28558739,gi|45552153	999778	1	118	128	787	0.00368	0.192	TSANDTEFDVK	R	G	0.95	69.2	36.7	0	0	6	0	2	1226.55	3049	3059	TRUE
bent CG32019-PA, isoform A [Drosophila melanogaster]	gi|28558739,gi|45552153	999778	1	118	128	787	0.00368	0.192	TVNDIPINSTVYTVPSLK	K	E	0.95	83.8	36.1	0	0	4	0	2	1961.06	6504	6521	TRUE
bent CG32019-PA, isoform A [Drosophila melanogaster]	gi|28558739,gi|45552153	999778	1	118	128	787	0.00368	0.192	VESFLSPLIDQFAK	K	E	0.95	42.4	36.6	0	0	1	0	2	1593.85	1634	1647	TRUE
bent CG32019-PA, isoform A [Drosophila melanogaster]	gi|28558739,gi|45552153	999778	1	118	128	787	0.00368	0.192	VIVTNEVGKDESSCK	K	I	0.95	51.1	36.5	0	0	1	1	2	1664.82	816	830	TRUE
bent CG32019-PA, isoform A [Drosophila melanogaster]	gi|28558739,gi|45552153	999778	1	118	128	787	0.00368	0.192	VLAVNEAGPGHPSKPSDPMTAEHQR	R	Y	0.95	66.1	35.7	2.21	0	0	5	2	2641.28	6429	6453	TRUE
bent CG32019-PA, isoform A [Drosophila melanogaster]	gi|28558739,gi|45552153	999778	1	118	128	787	0.00368	0.192	VLAVNTEGESEPLTGEQSVIAK	R	N	0.95	122	36.2	0	0	9	1	2	2271.17	4255	4276	TRUE
bent CG32019-PA, isoform A [Drosophila melanogaster]	gi|28558739,gi|45552153	999778	1	118	128	787	0.00368	0.192	VSAVNAAGTGEPSDSTPPIIAK	R	A	0.95	103	36.2	0	0	11	0	2	2082.07	4949	4970	TRUE
bent CG32019-PA, isoform A [Drosophila melanogaster]	gi|28558739,gi|45552153	999778	1	118	128	787	0.00368	0.192	VSAVNAEGESQPLVGDESIVAR	R	N	0.95	149	36.1	0	0	16	0	2	2227.12	4849	4870	TRUE
bent CG32019-PA, isoform A [Drosophila melanogaster]	gi|28558739,gi|45552153	999778	1	118	128	787	0.00368	0.192	VSAVNEEGESEPLTTLVGVVAK	R	D	0.95	117	36.2	0	0	25	5	2	2228.17	2771	2792	TRUE
bent CG32019-PA, isoform A [Drosophila melanogaster]	gi|28558739,gi|45552153	999778	1	118	128	787	0.00368	0.192	VSSFCTVPFVR	K	I	0.95	63.6	36.6	0	0	2	0	2	1298.66	6700	6710	TRUE
bent CG32019-PA, isoform A [Drosophila melanogaster]	gi|28558739,gi|45552153	999778	1	118	128	787	0.00368	0.192	VTILDAPSVPEGPLR	K	N	0.95	76.5	36.4	0	0	12	0	2	1563.87	5361	5375	TRUE
bent CG32019-PA, isoform A [Drosophila melanogaster]	gi|28558739,gi|45552153	999778	1	118	128	787	0.00368	0.192	VTVIDKPAPPNGPLK	K	V	0.95	73.8	36.5	0	0	5	3	2	1545.9	5064	5078	TRUE
bent CG32019-PA, isoform A [Drosophila melanogaster]	gi|28558739,gi|45552153	999778	1	118	128	787	0.00368	0.192	WAAPNNDGGAPIQK	K	Y	0.95	83.4	36.3	0	0	17	0	2	1438.71	2818	2831	TRUE
bent CG32019-PA, isoform A [Drosophila melanogaster]	gi|28558739,gi|45552153	999778	1	118	128	787	0.00368	0.192	WIPAGETDGPVTALK	R	V	0.95	46.3	36.5	0	0	4	0	2	1554.82	5117	5131	TRUE
bent CG32019-PA, isoform A [Drosophila melanogaster]	gi|28558739,gi|45552153	999778	1	118	128	787	0.00368	0.192	WVPVGDCTDTEIR	R	A	0.95	63.9	36.7	0	0	4	0	2	1547.72	5414	5426	TRUE
bent CG32019-PA, isoform A [Drosophila melanogaster]	gi|28558739,gi|45552153	999778	1	118	128	787	0.00368	0.192	YDGEPEPAATWVK	K	G	0.95	54.2	36.4	0	0	5	0	2	1462.69	2325	2337	TRUE
bent CG32019-PA, isoform A [Drosophila melanogaster]	gi|28558739,gi|45552153	999778	1	118	128	787	0.00368	0.192	YGQSDPANTSEPILAR	K	H	0.95	103	36.4	0	0	12	0	2	1718.84	6730	6745	TRUE
bent CG32019-PA, isoform A [Drosophila melanogaster]	gi|28558739,gi|45552153	999778	1	118	128	787	0.00368	0.192	YIEQPIKPAPLPIVTSR	K	Q	0.95	0	0	3.92	0	0	2	2	1922.11	8546	8562	TRUE
bent CG32019-PA, isoform A [Drosophila melanogaster]	gi|28558739,gi|45552153	999778	1	118	128	787	0.00368	0.192	YTVTAANEFGK	K	D	0.95	44.2	36.8	0	0	3	0	2	1200.59	6233	6243	TRUE
bent CG32019-PA, isoform A [Drosophila melanogaster]	gi|28558739,gi|45552153	999778	1	118	128	787	0.00368	0.192	YVGDDYYFIINR	R	V	0.95	46.2	36.3	0	0	1	0	2	1537.73	8359	8370	TRUE
terribly reduced optic lobes CG33950-PF, isoform F [Drosophila melanogaster]	gi|78706474	513388	1	89	107	871	0.00408	0.237	ADAGIYTCHGK	K	N	0.95	65.3	36.5	0	0	4	0	2	1192.54	3397	3407	TRUE	gi|161077537
terribly reduced optic lobes CG33950-PF, isoform F [Drosophila melanogaster]	gi|78706474	513388	1	89	107	871	0.00408	0.237	AEECVQCFCFGVAK	K	A	0.95	61.2	36.6	0	0	3	0	2	1704.72	1847	1860	TRUE	gi|161077537
terribly reduced optic lobes CG33950-PF, isoform F [Drosophila melanogaster]	gi|78706474	513388	1	89	107	871	0.00408	0.237	AEEPLALNEWHTVR	R	V	0.95	62	36.4	0	0	4	6	2	1664.84	4000	4013	TRUE	gi|161077537
terribly reduced optic lobes CG33950-PF, isoform F [Drosophila melanogaster]	gi|78706474	513388	1	89	107	871	0.00408	0.237	AQDNVEFNWFR	R	D	0.95	72.3	36.7	0	0	6	0	2	1425.66	3662	3672	TRUE	gi|161077537
terribly reduced optic lobes CG33950-PF, isoform F [Drosophila melanogaster]	gi|78706474	513388	1	89	107	871	0.00408	0.237	ATNVHFSGRETPYLALPADYMGNQLK	R	S	0.95	32.8	35.8	0	0	0	2	2	2909.43	1914	1939	TRUE	gi|161077537
terribly reduced optic lobes CG33950-PF, isoform F [Drosophila melanogaster]	gi|78706474	513388	1	89	107	871	0.00408	0.237	AVEVEQCR	R	C	0.95	64.3	37.3	0	0	6	0	2	990.468	2423	2430	TRUE	gi|161077537
terribly reduced optic lobes CG33950-PF, isoform F [Drosophila melanogaster]	gi|78706474	513388	1	89	107	871	0.00408	0.237	CAAGYVGDATR	R	G	0.95	76.4	36.1	0	0	5	0	2	1140.51	2494	2504	TRUE	gi|161077537
terribly reduced optic lobes CG33950-PF, isoform F [Drosophila melanogaster]	gi|78706474	513388	1	89	107	871	0.00408	0.237	CDGENDCGDNSDETSCDPEPSGAPCR	R	Y	0.95	94.7	35.6	6.59	0	4	11	2	2900.99	1676	1701	TRUE	gi|161077537
terribly reduced optic lobes CG33950-PF, isoform F [Drosophila melanogaster]	gi|78706474	513388	1	89	107	871	0.00408	0.237	CEQCAAGYQGNPLAAGGICR	R	R	0.95	134	36.3	0	0	5	3	2	2152.93	2148	2167	TRUE	gi|161077537
terribly reduced optic lobes CG33950-PF, isoform F [Drosophila melanogaster]	gi|78706474	513388	1	89	107	871	0.00408	0.237	CNSGQCVSSSVR	R	C	0.95	70.7	36.5	0	0	1	0	2	1340.57	1370	1381	TRUE	gi|161077537
terribly reduced optic lobes CG33950-PF, isoform F [Drosophila melanogaster]	gi|78706474	513388	1	89	107	871	0.00408	0.237	CPDMRPQDSGAYSCEIINTR	R	G	0.95	69.9	36	4.57	0	0	9	2	2386.02	1795	1814	TRUE	gi|161077537
terribly reduced optic lobes CG33950-PF, isoform F [Drosophila melanogaster]	gi|78706474	513388	1	89	107	871	0.00408	0.237	CPEGYLGLSCEQCAPGYAR	R	D	0.95	118	36.1	0	0	4	0	2	2187.93	2431	2449	TRUE	gi|161077537
terribly reduced optic lobes CG33950-PF, isoform F [Drosophila melanogaster]	gi|78706474	513388	1	89	107	871	0.00408	0.237	CQCPPGYVGDSCESCASGYVR	K	Q	0.95	123	35.9	0	0	5	1	2	2408.94	2058	2078	TRUE	gi|161077537
terribly reduced optic lobes CG33950-PF, isoform F [Drosophila melanogaster]	gi|78706474	513388	1	89	107	871	0.00408	0.237	CQYNEILNEHSLNFK	R	G	0.95	65.2	36.4	0	0	1	3	2	1908.89	4172	4186	TRUE	gi|161077537
terribly reduced optic lobes CG33950-PF, isoform F [Drosophila melanogaster]	gi|78706474	513388	1	89	107	871	0.00408	0.237	DASESDSGVYTCVAYDVR	R	T	0.95	131	36.2	0	0	13	0	2	1993.84	3113	3130	TRUE	gi|161077537
terribly reduced optic lobes CG33950-PF, isoform F [Drosophila melanogaster]	gi|78706474	513388	1	89	107	871	0.00408	0.237	DCAIEGTQCTPGVCGAGR	R	C	0.95	125	36.4	0	0	18	0	2	1908.8	4134	4151	TRUE	gi|161077537
terribly reduced optic lobes CG33950-PF, isoform F [Drosophila melanogaster]	gi|78706474	513388	1	89	107	871	0.00408	0.237	DENTAILEVDR	R	M	0.95	80.8	37	0	0	3	0	2	1274.62	4533	4543	TRUE	gi|161077537
terribly reduced optic lobes CG33950-PF, isoform F [Drosophila melanogaster]	gi|78706474	513388	1	89	107	871	0.00408	0.237	DLYSPPSNTAILK	R	I	0.95	81	36.6	0	0	18	0	2	1418.75	3378	3390	TRUE	gi|161077537
terribly reduced optic lobes CG33950-PF, isoform F [Drosophila melanogaster]	gi|78706474	513388	1	89	107	871	0.00408	0.237	DQVTSTFGR	R	S	0.95	49.2	35.9	0	0	6	0	2	1010.49	2237	2245	TRUE	gi|161077537
terribly reduced optic lobes CG33950-PF, isoform F [Drosophila melanogaster]	gi|78706474	513388	1	89	107	871	0.00408	0.237	DRESVQFQNLQK	R	L	0.95	41.4	36.5	0	0	0	1	2	1491.76	242	253	TRUE	gi|62473654,gi|24641813,gi|62473664
terribly reduced optic lobes CG33950-PF, isoform F [Drosophila melanogaster]	gi|78706474	513388	1	89	107	871	0.00408	0.237	DSVIGEQCDTCK	K	S	0.95	46.7	36.6	0	0	1	0	2	1411.58	2192	2203	TRUE	gi|161077537
terribly reduced optic lobes CG33950-PF, isoform F [Drosophila melanogaster]	gi|78706474	513388	1	89	107	871	0.00408	0.237	DTVSITITK	K	K	0.95	54.3	36.9	0	0	4	0	2	977.552	2943	2951	TRUE	gi|161077537
terribly reduced optic lobes CG33950-PF, isoform F [Drosophila melanogaster]	gi|78706474	513388	1	89	107	871	0.00408	0.237	EGENIQLQCTVTDQYGVR	R	A	0.95	114	36.3	0	0	9	0	2	2109.99	3644	3661	TRUE	gi|161077537
terribly reduced optic lobes CG33950-PF, isoform F [Drosophila melanogaster]	gi|78706474	513388	1	89	107	871	0.00408	0.237	EGITDCRPCAQGPCQNK	K	G	0.95	35.1	36.3	0	0	0	1	2	1990.85	4094	4110	TRUE	gi|161077537
terribly reduced optic lobes CG33950-PF, isoform F [Drosophila melanogaster]	gi|78706474	513388	1	89	107	871	0.00408	0.237	ELVLMPLPR	K	I	0.95	73.8	36.1	0	0	33	0	2	1067.63	3533	3541	TRUE	gi|161077537
terribly reduced optic lobes CG33950-PF, isoform F [Drosophila melanogaster]	gi|78706474	513388	1	89	107	871	0.00408	0.237	ESVQFQNLQK	R	L	0.95	65.6	36.6	0	0	23	0	2	1220.63	244	253	TRUE
terribly reduced optic lobes CG33950-PF, isoform F [Drosophila melanogaster]	gi|78706474	513388	1	89	107	871	0.00408	0.237	ETPYLALPADYMGNQLK	R	S	0.95	95	36.3	0	0	35	0	2	1939.95	1923	1939	TRUE	gi|161077537
terribly reduced optic lobes CG33950-PF, isoform F [Drosophila melanogaster]	gi|78706474	513388	1	89	107	871	0.00408	0.237	EVDLINIALDSAGTADK	R	G	0.95	147	36.5	0	0	33	2	2	1744.9	2031	2047	TRUE	gi|161077537
terribly reduced optic lobes CG33950-PF, isoform F [Drosophila melanogaster]	gi|78706474	513388	1	89	107	871	0.00408	0.237	FTLTYR	R	V	0.95	40.1	37	0	0	6	0	2	800.431	1970	1975	TRUE	gi|161077537
terribly reduced optic lobes CG33950-PF, isoform F [Drosophila melanogaster]	gi|78706474	513388	1	89	107	871	0.00408	0.237	FVSITQAAAGEYR	R	C	0.95	109	36.6	0	0	33	0	2	1412.72	3595	3607	TRUE	gi|161077537
terribly reduced optic lobes CG33950-PF, isoform F [Drosophila melanogaster]	gi|78706474	513388	1	89	107	871	0.00408	0.237	GDEVVANR	R	E	0.95	59.7	38	0	0	4	0	2	859.427	2370	2377	TRUE	gi|161077537
terribly reduced optic lobes CG33950-PF, isoform F [Drosophila melanogaster]	gi|78706474	513388	1	89	107	871	0.00408	0.237	GHDIVLIGNGLK	R	L	0.95	87.6	36.6	0	0	14	1	2	1235.71	2677	2688	TRUE	gi|161077537
terribly reduced optic lobes CG33950-PF, isoform F [Drosophila melanogaster]	gi|78706474	513388	1	89	107	871	0.00408	0.237	GLGSASLVEK	K	C	0.95	76.2	37.6	0	0	8	0	2	960.537	2048	2057	TRUE	gi|161077537
terribly reduced optic lobes CG33950-PF, isoform F [Drosophila melanogaster]	gi|78706474	513388	1	89	107	871	0.00408	0.237	GNSFAAYGTPK	K	V	0.95	57.8	36.4	0	0	1	0	2	1112.54	4187	4197	TRUE	gi|161077537
terribly reduced optic lobes CG33950-PF, isoform F [Drosophila melanogaster]	gi|78706474	513388	1	89	107	871	0.00408	0.237	GSGDYIALSLK	R	D	0.95	80.3	35.9	0	0	9	0	2	1123.6	3971	3981	TRUE	gi|161077537
terribly reduced optic lobes CG33950-PF, isoform F [Drosophila melanogaster]	gi|78706474	513388	1	89	107	871	0.00408	0.237	GSGRPVNGPDVIITGNR	R	F	0.95	68	36.6	0	0	10	11	2	1708.91	1953	1969	TRUE	gi|161077537
terribly reduced optic lobes CG33950-PF, isoform F [Drosophila melanogaster]	gi|78706474	513388	1	89	107	871	0.00408	0.237	GSVLGNQLFSYGGR	R	L	0.95	108	36.3	0	0	22	0	2	1454.74	2648	2661	TRUE	gi|161077537
terribly reduced optic lobes CG33950-PF, isoform F [Drosophila melanogaster]	gi|78706474	513388	1	89	107	871	0.00408	0.237	GVYSCVAENDHGSDLSSTSIDIEPR	R	E	0.95	51.1	35.7	5.85	0	0	2	2	2708.21	3217	3241	TRUE	gi|161077537
terribly reduced optic lobes CG33950-PF, isoform F [Drosophila melanogaster]	gi|78706474	513388	1	89	107	871	0.00408	0.237	ITTQGPGLLER	R	R	0.95	56	36.3	0	0	1	0	2	1184.66	790	800	TRUE	gi|161077537
terribly reduced optic lobes CG33950-PF, isoform F [Drosophila melanogaster]	gi|78706474	513388	1	89	107	871	0.00408	0.237	KAEECVQCFCFGVAK	R	A	0.95	74.2	36.5	0	0	4	3	2	1832.81	1846	1860	TRUE	gi|161077537
terribly reduced optic lobes CG33950-PF, isoform F [Drosophila melanogaster]	gi|78706474	513388	1	89	107	871	0.00408	0.237	KPADFHQVPQSQLQR	K	H	0.95	65.1	36.5	0	0	7	18	2	1778.93	3627	3641	TRUE	gi|161077537
terribly reduced optic lobes CG33950-PF, isoform F [Drosophila melanogaster]	gi|78706474	513388	1	89	107	871	0.00408	0.237	LDDQSSNLR	K	A	0.95	69.5	37.2	0	0	3	0	2	1047.51	3752	3760	TRUE	gi|161077537
terribly reduced optic lobes CG33950-PF, isoform F [Drosophila melanogaster]	gi|78706474	513388	1	89	107	871	0.00408	0.237	LDGEEAVIR	R	N	0.95	72.6	37.5	0	0	6	0	2	1001.53	4506	4514	TRUE	gi|161077537
terribly reduced optic lobes CG33950-PF, isoform F [Drosophila melanogaster]	gi|78706474	513388	1	89	107	871	0.00408	0.237	LDPVVVR	R	S	0.95	36.5	35.3	0	0	3	0	2	797.489	4250	4256	TRUE	gi|161077537
terribly reduced optic lobes CG33950-PF, isoform F [Drosophila melanogaster]	gi|78706474	513388	1	89	107	871	0.00408	0.237	LEIPNIR	R	V	0.95	40.2	35.4	0	0	10	0	2	854.51	1538	1544	TRUE	gi|161077537
terribly reduced optic lobes CG33950-PF, isoform F [Drosophila melanogaster]	gi|78706474	513388	1	89	107	871	0.00408	0.237	LEVEDQPHELK	K	S	0.95	63	36.5	0	0	1	1	2	1336.68	3831	3841	TRUE	gi|161077537
terribly reduced optic lobes CG33950-PF, isoform F [Drosophila melanogaster]	gi|78706474	513388	1	89	107	871	0.00408	0.237	LGEGILR	R	V	0.95	66.1	36.8	0	0	6	0	2	757.457	4275	4281	TRUE	gi|161077537
terribly reduced optic lobes CG33950-PF, isoform F [Drosophila melanogaster]	gi|78706474	513388	1	89	107	871	0.00408	0.237	LGYLDSTAR	R	E	0.95	63	35.9	0	0	6	0	2	995.516	2022	2030	TRUE	gi|161077537
terribly reduced optic lobes CG33950-PF, isoform F [Drosophila melanogaster]	gi|78706474	513388	1	89	107	871	0.00408	0.237	LIFDSPR	R	K	0.95	35.8	37.3	0	0	4	0	2	847.468	3010	3016	TRUE	gi|161077537
terribly reduced optic lobes CG33950-PF, isoform F [Drosophila melanogaster]	gi|78706474	513388	1	89	107	871	0.00408	0.237	LIWSRPDGNENQEEYNVR	K	L	0.95	75.7	36.1	2.8	0	0	8	2	2219.05	2689	2706	TRUE	gi|161077537
terribly reduced optic lobes CG33950-PF, isoform F [Drosophila melanogaster]	gi|78706474	513388	1	89	107	871	0.00408	0.237	LLDDDLR	K	N	0.95	40.9	38.1	0	0	3	0	2	859.453	254	260	TRUE
terribly reduced optic lobes CG33950-PF, isoform F [Drosophila melanogaster]	gi|78706474	513388	1	89	107	871	0.00408	0.237	LQQQLNVYNR	K	I	0.95	67.8	36.9	0	0	25	0	2	1275.68	299	308	TRUE
terribly reduced optic lobes CG33950-PF, isoform F [Drosophila melanogaster]	gi|78706474	513388	1	89	107	871	0.00408	0.237	LVISNVSPSDAGNYVCK	R	C	0.95	110	36.6	0	0	32	0	2	1822.9	3800	3816	TRUE	gi|161077537
terribly reduced optic lobes CG33950-PF, isoform F [Drosophila melanogaster]	gi|78706474	513388	1	89	107	871	0.00408	0.237	MLHSGETRPTSK	R	K	0.95	24.9	36.9	1.35	0	0	3	2	1359.67	4544	4555	TRUE	gi|161077537
terribly reduced optic lobes CG33950-PF, isoform F [Drosophila melanogaster]	gi|78706474	513388	1	89	107	871	0.00408	0.237	NEAGSDEAHVR	K	V	0.95	67.6	36.6	0	0	7	6	2	1184.53	3408	3418	TRUE	gi|161077537
terribly reduced optic lobes CG33950-PF, isoform F [Drosophila melanogaster]	gi|78706474	513388	1	89	107	871	0.00408	0.237	NFFHSNYEGNDDEEQEIR	R	S	0.95	60.7	36.1	2.74	0	1	4	2	2242.93	261	278	TRUE
terribly reduced optic lobes CG33950-PF, isoform F [Drosophila melanogaster]	gi|78706474	513388	1	89	107	871	0.00408	0.237	NIVGEATGVATITVQEPTLVQIIPDNR	K	D	0.95	38.3	35.7	2.03	0	0	1	2	2848.54	3317	3343	TRUE	gi|161077537
terribly reduced optic lobes CG33950-PF, isoform F [Drosophila melanogaster]	gi|78706474	513388	1	89	107	871	0.00408	0.237	NMYTYTHTSYLPK	R	Y	0.95	37.2	36.6	0	0	1	0	2	1618.76	2630	2642	TRUE	gi|161077537
terribly reduced optic lobes CG33950-PF, isoform F [Drosophila melanogaster]	gi|78706474	513388	1	89	107	871	0.00408	0.237	NSAPDVVIK	R	S	0.95	44.8	37.4	0	0	5	0	2	942.526	2327	2335	TRUE	gi|161077537
terribly reduced optic lobes CG33950-PF, isoform F [Drosophila melanogaster]	gi|78706474	513388	1	89	107	871	0.00408	0.237	NVIGDQCDQCRPGTYGLSAQNQDGCK	R	E	0.95	98.5	35.5	5.8	0	0	20	2	2941.26	2553	2578	TRUE	gi|161077537
terribly reduced optic lobes CG33950-PF, isoform F [Drosophila melanogaster]	gi|78706474	513388	1	89	107	871	0.00408	0.237	QVTLDVATPTNLGTPR	R	A	0.95	119	36.5	0	0	32	0	2	1682.91	2407	2422	TRUE	gi|161077537
terribly reduced optic lobes CG33950-PF, isoform F [Drosophila melanogaster]	gi|78706474	513388	1	89	107	871	0.00408	0.237	QYGQLQAGR	R	S	0.95	61.5	37	0	0	2	0	2	1020.52	3873	3881	TRUE	gi|161077537
terribly reduced optic lobes CG33950-PF, isoform F [Drosophila melanogaster]	gi|78706474	513388	1	89	107	871	0.00408	0.237	RCEQCAAGYQGNPLAAGGICR	R	R	0.95	77.2	36.1	6.4	0	0	5	2	2309.03	2147	2167	TRUE	gi|161077537
terribly reduced optic lobes CG33950-PF, isoform F [Drosophila melanogaster]	gi|78706474	513388	1	89	107	871	0.00408	0.237	RDENTAILEVDR	K	M	0.95	62.4	36.8	0	0	2	10	2	1430.72	4532	4543	TRUE	gi|161077537
terribly reduced optic lobes CG33950-PF, isoform F [Drosophila melanogaster]	gi|78706474	513388	1	89	107	871	0.00408	0.237	RPLPNNAR	R	T	0.95	36.9	35.9	0	0	4	0	2	937.533	3676	3683	TRUE	gi|161077537
terribly reduced optic lobes CG33950-PF, isoform F [Drosophila melanogaster]	gi|78706474	513388	1	89	107	871	0.00408	0.237	SLSSSPAR	R	N	0.95	46.6	37.8	0	0	2	0	2	804.422	3093	3100	TRUE	gi|161077537
terribly reduced optic lobes CG33950-PF, isoform F [Drosophila melanogaster]	gi|78706474	513388	1	89	107	871	0.00408	0.237	SQVVPSVANTYSVEIK	K	E	0.95	104	36.1	0	0	21	0	2	1720.91	2348	2363	TRUE	gi|161077537
terribly reduced optic lobes CG33950-PF, isoform F [Drosophila melanogaster]	gi|78706474	513388	1	89	107	871	0.00408	0.237	SSICDGNPDCSDASDEQSCSLGLK	K	C	0.95	118	36.1	0	0	17	9	2	2602.03	1633	1656	TRUE	gi|161077537
terribly reduced optic lobes CG33950-PF, isoform F [Drosophila melanogaster]	gi|78706474	513388	1	89	107	871	0.00408	0.237	SYGGNLR	K	Y	0.95	43.4	35.6	0	0	2	0	2	766.385	1940	1946	TRUE	gi|161077537
terribly reduced optic lobes CG33950-PF, isoform F [Drosophila melanogaster]	gi|78706474	513388	1	89	107	871	0.00408	0.237	SYGGTGTLR	K	C	0.95	54	35.6	0	0	2	0	2	911.459	1786	1794	TRUE	gi|161077537
terribly reduced optic lobes CG33950-PF, isoform F [Drosophila melanogaster]	gi|78706474	513388	1	89	107	871	0.00408	0.237	SYMSFPTLPNSSFK	R	F	0.95	56.1	36.4	0	0	9	0	2	1621.76	3934	3947	TRUE	gi|161077537
terribly reduced optic lobes CG33950-PF, isoform F [Drosophila melanogaster]	gi|78706474	513388	1	89	107	871	0.00408	0.237	TDEGDLYTTSYK	K	L	0.95	71.3	36.5	0	0	9	0	2	1392.62	3819	3830	TRUE	gi|161077537
terribly reduced optic lobes CG33950-PF, isoform F [Drosophila melanogaster]	gi|78706474	513388	1	89	107	871	0.00408	0.237	TDSQILVLTNLRPEDAGR	R	Y	0.95	62.9	36.2	0	0	8	2	2	1998.06	3684	3701	TRUE	gi|161077537
terribly reduced optic lobes CG33950-PF, isoform F [Drosophila melanogaster]	gi|78706474	513388	1	89	107	871	0.00408	0.237	TDVCEAGFFNMLAR	R	K	0.95	98.8	36.5	0	0	10	0	2	1646.73	1832	1845	TRUE	gi|161077537
terribly reduced optic lobes CG33950-PF, isoform F [Drosophila melanogaster]	gi|78706474	513388	1	89	107	871	0.00408	0.237	VDGAPLPR	R	N	0.95	42.2	35.2	0	0	2	0	2	824.463	3486	3493	TRUE	gi|161077537
terribly reduced optic lobes CG33950-PF, isoform F [Drosophila melanogaster]	gi|78706474	513388	1	89	107	871	0.00408	0.237	VDGQPLSPR	R	H	0.95	67	36.1	0	0	5	0	2	968.517	3281	3289	TRUE	gi|161077537
terribly reduced optic lobes CG33950-PF, isoform F [Drosophila melanogaster]	gi|78706474	513388	1	89	107	871	0.00408	0.237	VEQQNLGQYR	R	C	0.95	70.7	36.7	0	0	12	0	2	1234.62	3507	3516	TRUE	gi|161077537
terribly reduced optic lobes CG33950-PF, isoform F [Drosophila melanogaster]	gi|78706474	513388	1	89	107	871	0.00408	0.237	VEVQER	R	R	0.95	37.6	37.9	0	0	1	0	2	759.4	3419	3424	TRUE	gi|161077537
terribly reduced optic lobes CG33950-PF, isoform F [Drosophila melanogaster]	gi|78706474	513388	1	89	107	871	0.00408	0.237	VGANADLQCGADESR	K	Q	0.95	128	36.5	0	0	23	0	2	1562.69	3850	3864	TRUE	gi|161077537
terribly reduced optic lobes CG33950-PF, isoform F [Drosophila melanogaster]	gi|78706474	513388	1	89	107	871	0.00408	0.237	VPTQSTSIGNVILESAVTTR	R	T	0.95	163	36.5	0	0	32	6	2	2073.12	2747	2766	TRUE	gi|161077537
terribly reduced optic lobes CG33950-PF, isoform F [Drosophila melanogaster]	gi|78706474	513388	1	89	107	871	0.00408	0.237	VVSVELSPLR	R	Q	0.95	77.3	36.3	0	3	26	0	2	1098.65	1881	1890	TRUE	gi|161077537
terribly reduced optic lobes CG33950-PF, isoform F [Drosophila melanogaster]	gi|78706474	513388	1	89	107	871	0.00408	0.237	WSNSPVIVNWYK	R	E	0.95	65.6	36.4	0	0	1	0	2	1492.76	2888	2899	TRUE	gi|161077537
terribly reduced optic lobes CG33950-PF, isoform F [Drosophila melanogaster]	gi|78706474	513388	1	89	107	871	0.00408	0.237	YICNSYDVDR	R	G	0.95	63.9	36.8	0	0	14	0	2	1304.56	3702	3711	TRUE	gi|161077537
sallimus CG1915-PC, isoform C [Drosophila melanogaster]	gi|161080703	2.06604e+06	1	83	86	363	0.0017	0.0614	AEDAGVYLVVAR	R	N	0.95	36	36.9	0	0	1	0	2	1262.67	1091	1102	TRUE
sallimus CG1915-PC, isoform C [Drosophila melanogaster]	gi|161080703	2.06604e+06	1	83	86	363	0.0017	0.0614	AGEAFTSTTIFCSSK	K	E	0.95	62.3	36.5	0	0	3	0	2	1606.74	2973	2987	TRUE
sallimus CG1915-PC, isoform C [Drosophila melanogaster]	gi|161080703	2.06604e+06	1	83	86	363	0.0017	0.0614	AINEYGEAVTTATMK	R	I	0.95	79.4	36.7	0	0	7	0	2	1598.77	3478	3492	TRUE
sallimus CG1915-PC, isoform C [Drosophila melanogaster]	gi|161080703	2.06604e+06	1	83	86	363	0.0017	0.0614	AINNYGEDR	R	T	0.95	48.3	36.4	0	0	1	0	2	1051.48	3887	3895	TRUE
sallimus CG1915-PC, isoform C [Drosophila melanogaster]	gi|161080703	2.06604e+06	1	83	86	363	0.0017	0.0614	APEEQPTDFTFATK	K	D	0.95	46.3	36.4	0	0	2	0	2	1581.74	15829	15842	TRUE
sallimus CG1915-PC, isoform C [Drosophila melanogaster]	gi|161080703	2.06604e+06	1	83	86	363	0.0017	0.0614	APSVQEPLQDVVSELDK	K	E	0.95	54.8	36.6	0	0	1	0	2	1853.95	17472	17488	TRUE
sallimus CG1915-PC, isoform C [Drosophila melanogaster]	gi|161080703	2.06604e+06	1	83	86	363	0.0017	0.0614	APVFTVPLENIENLR	K	E	0.95	74.3	36.5	0	0	4	0	2	1711.94	3400	3414	TRUE
sallimus CG1915-PC, isoform C [Drosophila melanogaster]	gi|161080703	2.06604e+06	1	83	86	363	0.0017	0.0614	ATAADSGEYTVR	K	A	0.95	67.5	36.2	0	0	3	0	2	1240.58	1223	1234	TRUE
sallimus CG1915-PC, isoform C [Drosophila melanogaster]	gi|161080703	2.06604e+06	1	83	86	363	0.0017	0.0614	ATNQLGEAVNTCNVR	K	V	0.95	88.6	36.5	0	0	7	0	2	1646.79	2166	2180	TRUE
sallimus CG1915-PC, isoform C [Drosophila melanogaster]	gi|161080703	2.06604e+06	1	83	86	363	0.0017	0.0614	ATNQVGEAVSTSSLK	K	I	0.95	96.5	36.4	0	0	14	0	2	1491.77	2699	2713	TRUE
sallimus CG1915-PC, isoform C [Drosophila melanogaster]	gi|161080703	2.06604e+06	1	83	86	363	0.0017	0.0614	ATSVQWFR	K	E	0.95	36.9	36.3	0	0	1	0	2	994.511	4731	4738	TRUE
sallimus CG1915-PC, isoform C [Drosophila melanogaster]	gi|161080703	2.06604e+06	1	83	86	363	0.0017	0.0614	AVNALGQAVSSTNLR	R	V	0.95	93.4	36.7	0	0	7	0	2	1500.81	2299	2313	TRUE
sallimus CG1915-PC, isoform C [Drosophila melanogaster]	gi|161080703	2.06604e+06	1	83	86	363	0.0017	0.0614	AVNELGQAVTSASLIVQSK	R	T	0.95	67	36.6	0	0	1	0	2	1915.05	1767	1785	TRUE
sallimus CG1915-PC, isoform C [Drosophila melanogaster]	gi|161080703	2.06604e+06	1	83	86	363	0.0017	0.0614	AVNPLGEAVTTASMR	R	V	0.95	87.8	36.6	0	0	11	0	2	1516.78	2433	2447	TRUE
sallimus CG1915-PC, isoform C [Drosophila melanogaster]	gi|161080703	2.06604e+06	1	83	86	363	0.0017	0.0614	AYNAAGEAVSSTAMK	R	V	0.95	105	36.5	0	0	11	0	2	1470.69	2565	2579	TRUE
sallimus CG1915-PC, isoform C [Drosophila melanogaster]	gi|161080703	2.06604e+06	1	83	86	363	0.0017	0.0614	AYNAMGQDTTVAQLTVISK	R	N	0.95	34.9	36.2	0	0	1	0	2	2027.01	967	985	TRUE
sallimus CG1915-PC, isoform C [Drosophila melanogaster]	gi|161080703	2.06604e+06	1	83	86	363	0.0017	0.0614	CDGDCIVQSPSKPEKPTTPGSEK	R	A	0.95	55.2	36	1.66	0	1	5	2	2517.16	4580	4602	TRUE
sallimus CG1915-PC, isoform C [Drosophila melanogaster]	gi|161080703	2.06604e+06	1	83	86	363	0.0017	0.0614	CSANLVVEER	K	R	0.95	42.5	36.8	0	0	2	0	2	1176.57	4477	4486	TRUE
sallimus CG1915-PC, isoform C [Drosophila melanogaster]	gi|161080703	2.06604e+06	1	83	86	363	0.0017	0.0614	DVSVTEGMPAQFK	K	T	0.95	65.5	36.6	0	0	4	0	2	1424.67	4710	4722	TRUE
sallimus CG1915-PC, isoform C [Drosophila melanogaster]	gi|161080703	2.06604e+06	1	83	86	363	0.0017	0.0614	EEEETYITQAPR	R	F	0.95	54.4	36.4	0	0	1	0	2	1465.68	1014	1025	TRUE
sallimus CG1915-PC, isoform C [Drosophila melanogaster]	gi|161080703	2.06604e+06	1	83	86	363	0.0017	0.0614	EELVTEDEQPNPPK	R	F	0.95	73.8	36.3	0	0	16	0	2	1624.77	3664	3677	TRUE
sallimus CG1915-PC, isoform C [Drosophila melanogaster]	gi|161080703	2.06604e+06	1	83	86	363	0.0017	0.0614	EIQGDLEITR	K	K	0.95	44.1	37	0	0	2	0	2	1173.61	4354	4363	TRUE
sallimus CG1915-PC, isoform C [Drosophila melanogaster]	gi|161080703	2.06604e+06	1	83	86	363	0.0017	0.0614	ELECPQGQQADTSAPLVAEPPK	R	F	0.95	34	36	0	0	1	0	2	2365.13	3243	3264	TRUE
sallimus CG1915-PC, isoform C [Drosophila melanogaster]	gi|161080703	2.06604e+06	1	83	86	363	0.0017	0.0614	ELVEEVIEEEVK	R	V	0.95	62.9	36.8	0	0	2	0	2	1444.74	15738	15749	TRUE
sallimus CG1915-PC, isoform C [Drosophila melanogaster]	gi|161080703	2.06604e+06	1	83	86	363	0.0017	0.0614	EPEPEDIVDAAIVK	K	L	0.95	54.4	36.4	0	0	3	0	2	1524.78	16045	16058	TRUE
sallimus CG1915-PC, isoform C [Drosophila melanogaster]	gi|161080703	2.06604e+06	1	83	86	363	0.0017	0.0614	EQVVAPQFVQR	K	F	0.95	50.5	36.8	0	0	6	0	2	1300.7	466	476	TRUE
sallimus CG1915-PC, isoform C [Drosophila melanogaster]	gi|161080703	2.06604e+06	1	83	86	363	0.0017	0.0614	FECQLAPVGDPNMK	K	V	0.95	40.5	36.4	0	0	2	0	2	1605.74	3974	3987	TRUE
sallimus CG1915-PC, isoform C [Drosophila melanogaster]	gi|161080703	2.06604e+06	1	83	86	363	0.0017	0.0614	FEVEFEGEPNPTVK	K	W	0.95	64.4	36.4	0	0	4	0	2	1621.78	4413	4426	TRUE
sallimus CG1915-PC, isoform C [Drosophila melanogaster]	gi|161080703	2.06604e+06	1	83	86	363	0.0017	0.0614	FITQIVDVTK	K	L	0.95	68.7	37.1	0	0	5	0	2	1163.67	3265	3274	TRUE
sallimus CG1915-PC, isoform C [Drosophila melanogaster]	gi|161080703	2.06604e+06	1	83	86	363	0.0017	0.0614	FTTQITSVTVDEAEAVR	K	F	0.95	72.3	36.2	0	0	3	0	2	1866.94	3813	3829	TRUE
sallimus CG1915-PC, isoform C [Drosophila melanogaster]	gi|161080703	2.06604e+06	1	83	86	363	0.0017	0.0614	GAEGLEQIQDLEDSLR	K	K	0.95	41.7	36.6	0	0	1	0	2	1772.87	2999	3014	TRUE
sallimus CG1915-PC, isoform C [Drosophila melanogaster]	gi|161080703	2.06604e+06	1	83	86	363	0.0017	0.0614	GMAQSYEENLQEK	K	T	0.95	63.3	36.4	0	0	1	0	2	1526.68	4304	4316	TRUE
sallimus CG1915-PC, isoform C [Drosophila melanogaster]	gi|161080703	2.06604e+06	1	83	86	363	0.0017	0.0614	GTIISDTQHPEGLEK	R	I	0.95	54.8	36.3	0	0	3	0	2	1624.82	2318	2332	TRUE
sallimus CG1915-PC, isoform C [Drosophila melanogaster]	gi|161080703	2.06604e+06	1	83	86	363	0.0017	0.0614	HGTAEISCNLECVDKPR	K	G	0.95	51.6	36.4	2.47	0	0	5	2	1985.92	3110	3126	TRUE
sallimus CG1915-PC, isoform C [Drosophila melanogaster]	gi|161080703	2.06604e+06	1	83	86	363	0.0017	0.0614	HVQEAAEAIAPPQFK	R	T	0.95	34.5	36.6	0	0	1	0	2	1635.85	879	893	TRUE
sallimus CG1915-PC, isoform C [Drosophila melanogaster]	gi|161080703	2.06604e+06	1	83	86	363	0.0017	0.0614	IAELEGLGSR	R	S	0.95	89.6	37.3	0	0	6	0	2	1044.57	3516	3525	TRUE
sallimus CG1915-PC, isoform C [Drosophila melanogaster]	gi|161080703	2.06604e+06	1	83	86	363	0.0017	0.0614	IANLEYSMVR	K	T	0.95	75.3	36.2	0	0	5	0	2	1195.61	3378	3387	TRUE
sallimus CG1915-PC, isoform C [Drosophila melanogaster]	gi|161080703	2.06604e+06	1	83	86	363	0.0017	0.0614	IEDTGTYTCR	K	A	0.95	73	37	0	0	1	0	2	1215.53	3096	3105	TRUE
sallimus CG1915-PC, isoform C [Drosophila melanogaster]	gi|161080703	2.06604e+06	1	83	86	363	0.0017	0.0614	IEPVTDPNLK	K	V	0.95	39.6	35.8	0	0	4	0	2	1125.62	1448	1457	TRUE
sallimus CG1915-PC, isoform C [Drosophila melanogaster]	gi|161080703	2.06604e+06	1	83	86	363	0.0017	0.0614	IGEAISQSSIR	R	V	0.95	77.7	37.3	0	0	12	0	2	1160.63	832	842	TRUE
sallimus CG1915-PC, isoform C [Drosophila melanogaster]	gi|161080703	2.06604e+06	1	83	86	363	0.0017	0.0614	IGELEAPK	R	E	0.95	45	36.3	0	0	3	0	2	856.478	2733	2740	TRUE
sallimus CG1915-PC, isoform C [Drosophila melanogaster]	gi|161080703	2.06604e+06	1	83	86	363	0.0017	0.0614	LDAGAVQCLAR	R	N	0.95	83.5	37.1	0	0	5	0	2	1173.61	438	448	TRUE
sallimus CG1915-PC, isoform C [Drosophila melanogaster]	gi|161080703	2.06604e+06	1	83	86	363	0.0017	0.0614	LEPQTVEEGDPAR	K	F	0.95	66.4	36.3	0	0	32	0	2	1440.7	4098	4110	TRUE
sallimus CG1915-PC, isoform C [Drosophila melanogaster]	gi|161080703	2.06604e+06	1	83	86	363	0.0017	0.0614	LGEAQQQATMIVETR	K	S	0.95	77.5	36.3	0	0	3	0	2	1690.84	1105	1119	TRUE
sallimus CG1915-PC, isoform C [Drosophila melanogaster]	gi|161080703	2.06604e+06	1	83	86	363	0.0017	0.0614	LGSIQTSAQLK	K	V	0.95	67.8	37.2	0	0	6	0	2	1145.65	4682	4692	TRUE
sallimus CG1915-PC, isoform C [Drosophila melanogaster]	gi|161080703	2.06604e+06	1	83	86	363	0.0017	0.0614	LIEGSDAVFTAR	K	V	0.95	79.3	36.6	0	0	10	0	2	1278.67	266	277	TRUE
sallimus CG1915-PC, isoform C [Drosophila melanogaster]	gi|161080703	2.06604e+06	1	83	86	363	0.0017	0.0614	LLPVSAVESIDSTFK	R	V	0.95	41.7	36.3	0	0	2	0	2	1605.87	8915	8929	TRUE
sallimus CG1915-PC, isoform C [Drosophila melanogaster]	gi|161080703	2.06604e+06	1	83	86	363	0.0017	0.0614	LPEKIEPK	K	E	0.95	40	35.6	0	0	3	0	2	953.567	7072	7079	TRUE
sallimus CG1915-PC, isoform C [Drosophila melanogaster]	gi|161080703	2.06604e+06	1	83	86	363	0.0017	0.0614	LYVEVPR	R	E	0.95	39.6	37.7	0	0	2	0	2	875.499	558	564	TRUE
sallimus CG1915-PC, isoform C [Drosophila melanogaster]	gi|161080703	2.06604e+06	1	83	86	363	0.0017	0.0614	NAIGEAVTTCAVNVTANK	K	T	0.95	71.6	36.5	0	0	2	1	2	1832.92	2036	2053	TRUE
sallimus CG1915-PC, isoform C [Drosophila melanogaster]	gi|161080703	2.06604e+06	1	83	86	363	0.0017	0.0614	NEIGLSEPLESEEPYK	K	A	0.95	45.7	36.5	0	0	2	0	2	1833.88	18059	18074	TRUE
sallimus CG1915-PC, isoform C [Drosophila melanogaster]	gi|161080703	2.06604e+06	1	83	86	363	0.0017	0.0614	NQGPAQAPQISQKPR	R	S	0.95	35	36.6	0	0	0	3	2	1619.86	248	262	TRUE
sallimus CG1915-PC, isoform C [Drosophila melanogaster]	gi|161080703	2.06604e+06	1	83	86	363	0.0017	0.0614	NQLGEAVTSCSVR	R	I	0.95	79	36.5	0	0	10	0	2	1420.69	1369	1381	TRUE
sallimus CG1915-PC, isoform C [Drosophila melanogaster]	gi|161080703	2.06604e+06	1	83	86	363	0.0017	0.0614	NSVGESIATTELK	R	V	0.95	114	36.7	0	0	22	0	2	1348.7	4167	4179	TRUE
sallimus CG1915-PC, isoform C [Drosophila melanogaster]	gi|161080703	2.06604e+06	1	83	86	363	0.0017	0.0614	QLETYAPPPKPVVEEK	R	G	0.95	36.8	36.4	0	0	0	1	2	1824.97	2070	2085	TRUE
sallimus CG1915-PC, isoform C [Drosophila melanogaster]	gi|161080703	2.06604e+06	1	83	86	363	0.0017	0.0614	REEEETYITQAPR	R	F	0.95	50.5	36.4	0	0	0	2	2	1621.78	1013	1025	TRUE
sallimus CG1915-PC, isoform C [Drosophila melanogaster]	gi|161080703	2.06604e+06	1	83	86	363	0.0017	0.0614	REEEEYTVTTAPVFVTK	R	L	0.95	70.7	36.1	0	0	1	0	2	1999	1813	1829	TRUE
sallimus CG1915-PC, isoform C [Drosophila melanogaster]	gi|161080703	2.06604e+06	1	83	86	363	0.0017	0.0614	REEIDESTK	R	Q	0.95	40.4	36.7	0	0	1	0	2	1106.53	1547	1555	TRUE
sallimus CG1915-PC, isoform C [Drosophila melanogaster]	gi|161080703	2.06604e+06	1	83	86	363	0.0017	0.0614	SDALTQMEATIKK	R	Y	0.95	45.7	36.4	0	0	2	0	2	1451.74	3921	3933	TRUE
sallimus CG1915-PC, isoform C [Drosophila melanogaster]	gi|161080703	2.06604e+06	1	83	86	363	0.0017	0.0614	SEFVDEVVNIRPR	R	F	0.95	49.5	36.7	0	0	1	0	2	1559.82	1413	1425	TRUE
sallimus CG1915-PC, isoform C [Drosophila melanogaster]	gi|161080703	2.06604e+06	1	83	86	363	0.0017	0.0614	SGYEQDSQLSQELDR	R	N	0.95	107	36.4	0	0	6	0	2	1754.78	233	247	TRUE
sallimus CG1915-PC, isoform C [Drosophila melanogaster]	gi|161080703	2.06604e+06	1	83	86	363	0.0017	0.0614	SMILDTQHPDALEK	R	I	0.95	37.6	36.5	0	0	1	0	2	1597.79	2186	2199	TRUE
sallimus CG1915-PC, isoform C [Drosophila melanogaster]	gi|161080703	2.06604e+06	1	83	86	363	0.0017	0.0614	SQEGTYEVIATNR	K	E	0.95	73.5	36.5	0	0	1	0	2	1467.71	16696	16708	TRUE
sallimus CG1915-PC, isoform C [Drosophila melanogaster]	gi|161080703	2.06604e+06	1	83	86	363	0.0017	0.0614	SSGSVVVSDQKPDEQIKPPR	K	F	0.95	67.6	36.3	3.07	0	2	2	2	2153.12	6823	6842	TRUE
sallimus CG1915-PC, isoform C [Drosophila melanogaster]	gi|161080703	2.06604e+06	1	83	86	363	0.0017	0.0614	SSIIHETQHEEALTK	R	I	0.95	47	36.3	0	0	0	3	2	1722.87	1920	1934	TRUE
sallimus CG1915-PC, isoform C [Drosophila melanogaster]	gi|161080703	2.06604e+06	1	83	86	363	0.0017	0.0614	SSLILDSQLPR	K	G	0.95	59.9	36.9	0	0	1	0	2	1228.69	3359	3369	TRUE
sallimus CG1915-PC, isoform C [Drosophila melanogaster]	gi|161080703	2.06604e+06	1	83	86	363	0.0017	0.0614	TLDLDTLDAQR	K	L	0.95	37.8	37	0	0	4	0	2	1260.64	2054	2064	TRUE
sallimus CG1915-PC, isoform C [Drosophila melanogaster]	gi|161080703	2.06604e+06	1	83	86	363	0.0017	0.0614	TPIQNQLDLR	K	E	0.95	78.3	36.3	0	0	8	0	2	1197.66	894	903	TRUE
sallimus CG1915-PC, isoform C [Drosophila melanogaster]	gi|161080703	2.06604e+06	1	83	86	363	0.0017	0.0614	TQNLENKPFVEPQYDIEEISK	K	S	0.95	0	0	2.55	0	0	1	2	2521.25	1135	1155	TRUE
sallimus CG1915-PC, isoform C [Drosophila melanogaster]	gi|161080703	2.06604e+06	1	83	86	363	0.0017	0.0614	VEELEDYR	K	K	0.95	39.6	35.9	0	0	1	0	2	1052.49	865	872	TRUE
sallimus CG1915-PC, isoform C [Drosophila melanogaster]	gi|161080703	2.06604e+06	1	83	86	363	0.0017	0.0614	VIEPEPIPGPEIIYLR	K	H	0.95	64.3	36.5	0	0	4	0	2	1835.03	582	597	TRUE
sallimus CG1915-PC, isoform C [Drosophila melanogaster]	gi|161080703	2.06604e+06	1	83	86	363	0.0017	0.0614	VPNEETPVQEQYAK	K	V	0.95	38.7	36.7	0	0	1	0	2	1631.79	14441	14454	TRUE
sallimus CG1915-PC, isoform C [Drosophila melanogaster]	gi|161080703	2.06604e+06	1	83	86	363	0.0017	0.0614	VTNASGVAESR	R	A	0.95	63.1	37.2	0	0	1	0	2	1090.55	694	704	TRUE
sallimus CG1915-PC, isoform C [Drosophila melanogaster]	gi|161080703	2.06604e+06	1	83	86	363	0.0017	0.0614	VTSSTGQVESSAK	R	L	0.95	74.2	36.4	0	0	1	0	2	1280.63	4777	4789	TRUE
sallimus CG1915-PC, isoform C [Drosophila melanogaster]	gi|161080703	2.06604e+06	1	83	86	363	0.0017	0.0614	VVAANPIGESEPTESDPVTITK	R	K	0.95	52.8	36.2	0	0	2	0	2	2254.15	17732	17753	TRUE
sallimus CG1915-PC, isoform C [Drosophila melanogaster]	gi|161080703	2.06604e+06	1	83	86	363	0.0017	0.0614	VVEEVFGPPK	K	F	0.95	47.9	37.3	0	0	2	0	2	1100.6	3803	3812	TRUE
sallimus CG1915-PC, isoform C [Drosophila melanogaster]	gi|161080703	2.06604e+06	1	83	86	363	0.0017	0.0614	VVESEAPVAEEVFSEAPESK	K	I	0.95	119	36.2	0	0	2	0	2	2133.02	15542	15561	TRUE
sallimus CG1915-PC, isoform C [Drosophila melanogaster]	gi|161080703	2.06604e+06	1	83	86	363	0.0017	0.0614	VVSEASIQMDTQHPDSISR	R	I	0.95	19.5	36.3	1.8	0	0	1	2	2116	2448	2466	TRUE
sallimus CG1915-PC, isoform C [Drosophila melanogaster]	gi|161080703	2.06604e+06	1	83	86	363	0.0017	0.0614	YECVAVNAAGEAR	R	C	0.95	81.2	36.4	0	0	4	0	2	1409.65	4567	4579	TRUE
sallimus CG1915-PC, isoform C [Drosophila melanogaster]	gi|161080703	2.06604e+06	1	83	86	363	0.0017	0.0614	YGEDFTR	K	T	0.95	35.2	37.4	0	0	1	0	2	887.39	3211	3217	TRUE
sallimus CG1915-PC, isoform C [Drosophila melanogaster]	gi|161080703	2.06604e+06	1	83	86	363	0.0017	0.0614	YVNPEDSGTYTCR	K	A	0.95	77.7	36.6	0	0	27	0	2	1561.66	1754	1766	TRUE
CG32702 CG32702-PA [Drosophila melanogaster]	gi|24640838	411066	1	55	57	276	0.00129	0.175	AGSFQLNYR	R	M	0.95	35.9	36.1	0	0	1	0	2	1055.53	772	780	TRUE
CG32702 CG32702-PA [Drosophila melanogaster]	gi|24640838	411066	1	55	57	276	0.00129	0.175	AIDFAEQYK	R	N	0.95	53.2	36.4	0	0	9	0	2	1084.53	2845	2853	TRUE
CG32702 CG32702-PA [Drosophila melanogaster]	gi|24640838	411066	1	55	57	276	0.00129	0.175	DALTVSNHK	K	N	0.95	47.5	36.6	0	0	5	0	2	984.511	1448	1456	TRUE
CG32702 CG32702-PA [Drosophila melanogaster]	gi|24640838	411066	1	55	57	276	0.00129	0.175	DDDLHNPLIQLENNK	K	G	0.95	64.9	36.5	0	0	2	0	2	1777.87	1247	1261	TRUE
CG32702 CG32702-PA [Drosophila melanogaster]	gi|24640838	411066	1	55	57	276	0.00129	0.175	DGGGTFADIIGR	R	F	0.95	88.8	36.6	0	0	19	0	2	1178.58	3251	3262	TRUE
CG32702 CG32702-PA [Drosophila melanogaster]	gi|24640838	411066	1	55	57	276	0.00129	0.175	DLDECQTNNGGCSLSPK	R	V	0.95	81.9	36.3	0	0	13	0	2	1894.79	254	270	TRUE
CG32702 CG32702-PA [Drosophila melanogaster]	gi|24640838	411066	1	55	57	276	0.00129	0.175	DLLLIHEEGK	R	Q	0.95	65.6	36.1	0	0	7	0	2	1166.64	2339	2348	TRUE
CG32702 CG32702-PA [Drosophila melanogaster]	gi|24640838	411066	1	55	57	276	0.00129	0.175	DPQQTTLCGVK	K	H	0.95	51.4	36.7	0	0	3	0	2	1246.61	3022	3032	TRUE
CG32702 CG32702-PA [Drosophila melanogaster]	gi|24640838	411066	1	55	57	276	0.00129	0.175	DYLLVQQR	K	N	0.95	45.5	37	0	0	2	0	2	1034.56	2889	2896	TRUE
CG32702 CG32702-PA [Drosophila melanogaster]	gi|24640838	411066	1	55	57	276	0.00129	0.175	EDANQQYPTEGDCLNVGVK	R	I	0.95	71.8	36.3	0	0	2	0	2	2136.95	1658	1676	TRUE
CG32702 CG32702-PA [Drosophila melanogaster]	gi|24640838	411066	1	55	57	276	0.00129	0.175	EESESGQLIGVYCGNEVPGVIHSR	R	G	0.95	66.6	36	2.18	0	0	2	2	2616.24	1791	1814	TRUE
CG32702 CG32702-PA [Drosophila melanogaster]	gi|24640838	411066	1	55	57	276	0.00129	0.175	EVTINSPAR	K	T	0.95	42.6	37.4	0	0	2	0	2	986.527	3319	3327	TRUE
CG32702 CG32702-PA [Drosophila melanogaster]	gi|24640838	411066	1	55	57	276	0.00129	0.175	FAGVYSDHQIPR	R	H	0.95	65.4	36.8	0	0	7	0	2	1389.69	3670	3681	TRUE
CG32702 CG32702-PA [Drosophila melanogaster]	gi|24640838	411066	1	55	57	276	0.00129	0.175	FDWLQINDGR	R	S	0.95	82.1	36.6	0	0	5	0	2	1263.61	494	503	TRUE
CG32702 CG32702-PA [Drosophila melanogaster]	gi|24640838	411066	1	55	57	276	0.00129	0.175	FLDGIPAENQGFR	R	L	0.95	57.7	36.5	0	0	8	0	2	1463.73	2431	2443	TRUE
CG32702 CG32702-PA [Drosophila melanogaster]	gi|24640838	411066	1	55	57	276	0.00129	0.175	FQDPVPYSWR	K	I	0.95	43.2	36.4	0	0	2	0	2	1294.62	1860	1869	TRUE
CG32702 CG32702-PA [Drosophila melanogaster]	gi|24640838	411066	1	55	57	276	0.00129	0.175	FSSCNGMLSAQSGR	R	L	0.95	103	36.7	0	0	5	0	2	1501.65	436	449	TRUE
CG32702 CG32702-PA [Drosophila melanogaster]	gi|24640838	411066	1	55	57	276	0.00129	0.175	FYIEDSPGCTK	R	D	0.95	59.1	36.8	0	0	9	0	2	1316.58	2878	2888	TRUE
CG32702 CG32702-PA [Drosophila melanogaster]	gi|24640838	411066	1	55	57	276	0.00129	0.175	GSTIDLTSEYLQIPTLR	K	N	0.95	72.6	36.5	0	0	2	0	2	1907.01	2362	2378	TRUE
CG32702 CG32702-PA [Drosophila melanogaster]	gi|24640838	411066	1	55	57	276	0.00129	0.175	GTFGFFQSPNYPK	R	M	0.95	64.9	36.5	0	0	12	0	2	1489.71	1398	1410	TRUE
CG32702 CG32702-PA [Drosophila melanogaster]	gi|24640838	411066	1	55	57	276	0.00129	0.175	GTIVFDSDASNTFR	K	G	0.95	90	36.7	0	0	6	0	2	1529.72	1262	1275	TRUE
CG32702 CG32702-PA [Drosophila melanogaster]	gi|24640838	411066	1	55	57	276	0.00129	0.175	HYDGLQGR	R	V	0.95	39	37.7	0	0	1	0	2	945.454	3455	3462	TRUE
CG32702 CG32702-PA [Drosophila melanogaster]	gi|24640838	411066	1	55	57	276	0.00129	0.175	IDGCMEELR	R	G	0.95	58	36	0	0	2	0	2	1122.49	1389	1397	TRUE
CG32702 CG32702-PA [Drosophila melanogaster]	gi|24640838	411066	1	55	57	276	0.00129	0.175	IFSGSDLQNWSELR	K	T	0.95	49.5	36.3	0	0	1	0	2	1651.81	2021	2034	TRUE
CG32702 CG32702-PA [Drosophila melanogaster]	gi|24640838	411066	1	55	57	276	0.00129	0.175	ILCDYQSPAPGKPLPSIR	R	L	0.95	51.2	36.3	1.64	0	0	2	2	2012.06	2652	2669	TRUE
CG32702 CG32702-PA [Drosophila melanogaster]	gi|24640838	411066	1	55	57	276	0.00129	0.175	INEDLPLISIPQER	R	G	0.95	88.8	36.5	0	0	14	0	2	1636.89	3147	3160	TRUE
CG32702 CG32702-PA [Drosophila melanogaster]	gi|24640838	411066	1	55	57	276	0.00129	0.175	IVDTLMLCGMEAK	K	H	0.95	67.6	36.3	0	0	5	0	2	1512.71	2404	2416	TRUE
CG32702 CG32702-PA [Drosophila melanogaster]	gi|24640838	411066	1	55	57	276	0.00129	0.175	IYEGTEPQGTPR	K	L	0.95	85.7	36.9	0	0	21	0	2	1347.65	1677	1688	TRUE
CG32702 CG32702-PA [Drosophila melanogaster]	gi|24640838	411066	1	55	57	276	0.00129	0.175	LCGGIISR	R	T	0.95	55	37.3	0	0	1	0	2	875.477	3066	3073	TRUE
CG32702 CG32702-PA [Drosophila melanogaster]	gi|24640838	411066	1	55	57	276	0.00129	0.175	LCGSSEITLSADGTK	R	E	0.95	82.5	36.6	0	0	5	0	2	1538.74	3304	3318	TRUE
CG32702 CG32702-PA [Drosophila melanogaster]	gi|24640838	411066	1	55	57	276	0.00129	0.175	LEQEEELMER	R	I	0.95	63.8	36.7	0	0	8	0	2	1305.6	2642	2651	TRUE
CG32702 CG32702-PA [Drosophila melanogaster]	gi|24640838	411066	1	55	57	276	0.00129	0.175	LILHTDSAINGR	R	G	0.95	53.2	36.4	1.33	0	0	4	2	1309.72	1145	1156	TRUE
CG32702 CG32702-PA [Drosophila melanogaster]	gi|24640838	411066	1	55	57	276	0.00129	0.175	LNPPTFTSEFNR	R	L	0.95	45.8	36.4	0	0	5	0	2	1422.7	752	763	TRUE
CG32702 CG32702-PA [Drosophila melanogaster]	gi|24640838	411066	1	55	57	276	0.00129	0.175	LREDANQQYPTEGDCLNVGVK	K	I	0.95	59.4	36.1	3.39	0	1	4	2	2406.14	1656	1676	TRUE
CG32702 CG32702-PA [Drosophila melanogaster]	gi|24640838	411066	1	55	57	276	0.00129	0.175	NGNDEDSPFLGR	R	G	0.95	62.9	36.5	0	0	6	0	2	1320.58	2144	2155	TRUE
CG32702 CG32702-PA [Drosophila melanogaster]	gi|24640838	411066	1	55	57	276	0.00129	0.175	SDGDVVADGFLAK	R	F	0.95	98.8	36.5	0	0	10	0	2	1293.63	2931	2943	TRUE
CG32702 CG32702-PA [Drosophila melanogaster]	gi|24640838	411066	1	55	57	276	0.00129	0.175	SDYVELR	R	D	0.95	34.6	35.1	0	0	1	0	2	881.437	3244	3250	TRUE
CG32702 CG32702-PA [Drosophila melanogaster]	gi|24640838	411066	1	55	57	276	0.00129	0.175	SGGKDDDFVDAR	R	E	0.95	45.3	36.3	0	0	1	1	2	1281.57	14	25	TRUE
CG32702 CG32702-PA [Drosophila melanogaster]	gi|24640838	411066	1	55	57	276	0.00129	0.175	SLFSNANELR	K	L	0.95	66	36.4	0	0	2	0	2	1150.59	3524	3533	TRUE
CG32702 CG32702-PA [Drosophila melanogaster]	gi|24640838	411066	1	55	57	276	0.00129	0.175	SNMGAISSPR	R	Y	0.95	50.5	36.7	0	0	1	0	2	1035.49	1175	1184	TRUE
CG32702 CG32702-PA [Drosophila melanogaster]	gi|24640838	411066	1	55	57	276	0.00129	0.175	SPQDIDIPAGQTPR	R	T	0.95	72.4	36.1	0	0	16	0	2	1494.76	299	312	TRUE
CG32702 CG32702-PA [Drosophila melanogaster]	gi|24640838	411066	1	55	57	276	0.00129	0.175	TACGSEITASK	R	G	0.95	81	35.9	0	0	4	0	2	1124.53	2075	2085	TRUE
CG32702 CG32702-PA [Drosophila melanogaster]	gi|24640838	411066	1	55	57	276	0.00129	0.175	TGFNGIVR	K	T	0.95	57.8	37.1	0	0	5	0	2	863.474	2067	2074	TRUE
CG32702 CG32702-PA [Drosophila melanogaster]	gi|24640838	411066	1	55	57	276	0.00129	0.175	TGSYLTSLDLTYLASPVEK	K	G	0.95	60.4	36.3	0	0	3	0	2	2058.06	3538	3556	TRUE
CG32702 CG32702-PA [Drosophila melanogaster]	gi|24640838	411066	1	55	57	276	0.00129	0.175	TLCSLPTESSDR	R	V	0.95	53.5	36.1	0	0	6	0	2	1365.63	2035	2046	TRUE
CG32702 CG32702-PA [Drosophila melanogaster]	gi|24640838	411066	1	55	57	276	0.00129	0.175	TPGGNYPNGVSCFWK	R	I	0.95	47.8	36.4	0	0	4	0	2	1683.76	3328	3342	TRUE
CG32702 CG32702-PA [Drosophila melanogaster]	gi|24640838	411066	1	55	57	276	0.00129	0.175	TVNYDGIGWVIR	K	F	0.95	58.5	36.5	0	0	2	0	2	1392.73	3658	3669	TRUE
CG32702 CG32702-PA [Drosophila melanogaster]	gi|24640838	411066	1	55	57	276	0.00129	0.175	VLCKDDDLHNPLIQLENNK	K	G	0.95	51.5	36	2.72	0	0	2	2	2278.15	1243	1261	TRUE
CG32702 CG32702-PA [Drosophila melanogaster]	gi|24640838	411066	1	55	57	276	0.00129	0.175	VLVEVSHLAR	R	H	0.95	42.3	36	0	0	7	0	2	1122.66	1325	1334	TRUE
CG32702 CG32702-PA [Drosophila melanogaster]	gi|24640838	411066	1	55	57	276	0.00129	0.175	VPGCGGVYTAK	R	E	0.95	74.7	36.2	0	0	3	0	2	1108.55	671	681	TRUE
CG32702 CG32702-PA [Drosophila melanogaster]	gi|24640838	411066	1	55	57	276	0.00129	0.175	WQLVAPTTK	R	R	0.95	36.1	37.4	0	0	1	0	2	1043.59	586	594	TRUE
CG32702 CG32702-PA [Drosophila melanogaster]	gi|24640838	411066	1	55	57	276	0.00129	0.175	YCEDVVHEVLNTSSNK	K	A	0.95	46.1	36.5	0	0	1	0	2	1893.87	2158	2173	TRUE
Papilin CG33103-PA, isoform A [Drosophila melanogaster]	gi|28572036	312636	1	51	58	438	0.00205	0.228	CEAQWFSSEWSK	K	C	0.95	68.3	36.5	0	0	2	0	2	1544.65	576	587	TRUE
Papilin CG33103-PA, isoform A [Drosophila melanogaster]	gi|28572036	312636	1	51	58	438	0.00205	0.228	CEEFQYGGCYGTNNR	R	F	0.95	102	36.3	0	0	9	0	2	1854.72	1696	1710	TRUE
Papilin CG33103-PA, isoform A [Drosophila melanogaster]	gi|28572036	312636	1	51	58	438	0.00205	0.228	CLSQEPPAPTPPR	R	A	0.95	37.2	36.4	0	0	2	0	2	1449.72	1972	1984	TRUE
Papilin CG33103-PA, isoform A [Drosophila melanogaster]	gi|28572036	312636	1	51	58	438	0.00205	0.228	CQSFYYGGCGGNDNR	R	F	0.95	81.2	36.4	0	0	1	0	2	1754.67	2026	2040	TRUE
Papilin CG33103-PA, isoform A [Drosophila melanogaster]	gi|28572036	312636	1	51	58	438	0.00205	0.228	CSVNIDIR	R	I	0.95	44.3	37.1	0	0	2	0	2	976.489	2051	2058	TRUE
Papilin CG33103-PA, isoform A [Drosophila melanogaster]	gi|28572036	312636	1	51	58	438	0.00205	0.228	CVPFYYSGCGGNK	R	N	0.95	79.8	36.5	0	0	5	0	2	1508.63	1815	1827	TRUE
Papilin CG33103-PA, isoform A [Drosophila melanogaster]	gi|28572036	312636	1	51	58	438	0.00205	0.228	DDVPLYNNER	K	V	0.95	36.1	36.8	0	0	3	0	2	1234.57	2790	2799	TRUE
Papilin CG33103-PA, isoform A [Drosophila melanogaster]	gi|28572036	312636	1	51	58	438	0.00205	0.228	DLAPGYNDLLLLPEGATNIR	K	I	0.95	80.5	36.1	0	0	12	0	2	2155.14	224	243	TRUE
Papilin CG33103-PA, isoform A [Drosophila melanogaster]	gi|28572036	312636	1	51	58	438	0.00205	0.228	EICLLPVATGR	K	C	0.95	65.6	36.7	0	0	4	0	2	1228.67	2316	2326	TRUE
Papilin CG33103-PA, isoform A [Drosophila melanogaster]	gi|28572036	312636	1	51	58	438	0.00205	0.228	ETKPESEQDCEGEEK	K	V	0.95	43.2	36.4	0	0	0	1	2	1794.73	623	637	TRUE
Papilin CG33103-PA, isoform A [Drosophila melanogaster]	gi|28572036	312636	1	51	58	438	0.00205	0.228	EVALQVTEPVSQPAYIYGDK	R	N	0.95	118	36.1	0	0	7	0	2	2207.12	2605	2624	TRUE
Papilin CG33103-PA, isoform A [Drosophila melanogaster]	gi|28572036	312636	1	51	58	438	0.00205	0.228	FETENDCQQR	R	C	0.95	54.3	36.4	0	0	4	0	2	1326.54	1962	1971	TRUE
Papilin CG33103-PA, isoform A [Drosophila melanogaster]	gi|28572036	312636	1	51	58	438	0.00205	0.228	FGCCPDGVTK	K	A	0.95	63.2	36.1	0	0	4	0	2	1140.48	1583	1592	TRUE
Papilin CG33103-PA, isoform A [Drosophila melanogaster]	gi|28572036	312636	1	51	58	438	0.00205	0.228	FGCCPDSQTPAHGPNK	R	E	0.95	49.3	36.7	0	0	0	4	2	1772.75	1434	1449	TRUE
Papilin CG33103-PA, isoform A [Drosophila melanogaster]	gi|28572036	312636	1	51	58	438	0.00205	0.228	FGGCENVQEPPQK	K	A	0.95	62.6	36.5	0	0	4	0	2	1489.67	1598	1610	TRUE
Papilin CG33103-PA, isoform A [Drosophila melanogaster]	gi|28572036	312636	1	51	58	438	0.00205	0.228	FPTEESCLAR	R	C	0.95	46.7	36.3	0	0	15	0	2	1209.56	1889	1898	TRUE
Papilin CG33103-PA, isoform A [Drosophila melanogaster]	gi|28572036	312636	1	51	58	438	0.00205	0.228	FWYGGCDGNDNR	R	F	0.95	62.7	36.8	0	0	3	0	2	1460.57	1640	1651	TRUE
Papilin CG33103-PA, isoform A [Drosophila melanogaster]	gi|28572036	312636	1	51	58	438	0.00205	0.228	GPDFEGCGLASPVAK	K	G	0.95	104	36.6	0	0	24	0	2	1504.71	1387	1401	TRUE
Papilin CG33103-PA, isoform A [Drosophila melanogaster]	gi|28572036	312636	1	51	58	438	0.00205	0.228	GPFDEGCPIAK	K	T	0.95	57.6	37.2	0	0	10	0	2	1190.55	1266	1276	TRUE
Papilin CG33103-PA, isoform A [Drosophila melanogaster]	gi|28572036	312636	1	51	58	438	0.00205	0.228	GPNGDGCTCVESK	K	F	0.95	42	36.3	0	0	1	0	2	1380.55	1570	1582	TRUE
Papilin CG33103-PA, isoform A [Drosophila melanogaster]	gi|28572036	312636	1	51	58	438	0.00205	0.228	GPNNEGCECHYTPYGCCPDNK	R	S	0.95	51.6	35.8	2.02	0	0	6	2	2528.93	1470	1490	TRUE
Papilin CG33103-PA, isoform A [Drosophila melanogaster]	gi|28572036	312636	1	51	58	438	0.00205	0.228	GVDVCNEPVTTGPCTDWQTK	K	Y	0.95	89.8	36.1	0	0	10	2	2	2264	2249	2268	TRUE
Papilin CG33103-PA, isoform A [Drosophila melanogaster]	gi|28572036	312636	1	51	58	438	0.00205	0.228	IEETVPSSNYLACR	R	N	0.95	70.2	36.5	0	0	25	0	2	1638.78	244	257	TRUE
Papilin CG33103-PA, isoform A [Drosophila melanogaster]	gi|28572036	312636	1	51	58	438	0.00205	0.228	IGADPVEHDTSK	R	C	0.95	84	36.4	0	0	2	0	2	1268.61	2059	2070	TRUE
Papilin CG33103-PA, isoform A [Drosophila melanogaster]	gi|28572036	312636	1	51	58	438	0.00205	0.228	ISSSGEHTVEEDAVCLK	R	E	0.95	95.8	36.4	0	0	12	7	2	1860.87	427	443	TRUE
Papilin CG33103-PA, isoform A [Drosophila melanogaster]	gi|28572036	312636	1	51	58	438	0.00205	0.228	ITLAEVNPSLCDQK	R	S	0.95	99	36.6	0	0	27	0	2	1587.81	369	382	TRUE
Papilin CG33103-PA, isoform A [Drosophila melanogaster]	gi|28572036	312636	1	51	58	438	0.00205	0.228	IVICGEFDGK	R	T	0.95	73	36	0	0	10	0	2	1137.56	600	609	TRUE
Papilin CG33103-PA, isoform A [Drosophila melanogaster]	gi|28572036	312636	1	51	58	438	0.00205	0.228	KSCSFSEFGCCPDAETSAK	K	G	0.95	17.8	36.2	4.68	0	0	1	2	2167.87	1368	1386	TRUE
Papilin CG33103-PA, isoform A [Drosophila melanogaster]	gi|28572036	312636	1	51	58	438	0.00205	0.228	LVLSDVTSADSGK	R	Y	0.95	109	36.7	0	1	32	0	2	1291.67	2809	2821	TRUE
Papilin CG33103-PA, isoform A [Drosophila melanogaster]	gi|28572036	312636	1	51	58	438	0.00205	0.228	NGQMFGLK	R	N	0.95	41.8	35.9	0	0	2	0	2	894.451	2655	2662	TRUE
Papilin CG33103-PA, isoform A [Drosophila melanogaster]	gi|28572036	312636	1	51	58	438	0.00205	0.228	NNFPTLESCEDHCPR	K	Q	0.95	70.5	36.5	0	0	7	0	2	1875.78	1828	1842	TRUE
Papilin CG33103-PA, isoform A [Drosophila melanogaster]	gi|28572036	312636	1	51	58	438	0.00205	0.228	QDVCDEEPAPGECSTWVLK	R	W	0.95	86.8	36.2	0	0	17	0	2	2219.96	1919	1937	TRUE
Papilin CG33103-PA, isoform A [Drosophila melanogaster]	gi|28572036	312636	1	51	58	438	0.00205	0.228	QPDPAPTVAQCSQPADPGQCDK	R	W	0.95	73.2	35.9	0	0	14	12	2	2367.03	1991	2012	TRUE
Papilin CG33103-PA, isoform A [Drosophila melanogaster]	gi|28572036	312636	1	51	58	438	0.00205	0.228	QTDDGTYVCVASNGLGEPVR	R	R	0.95	49	36.2	0	0	2	0	2	2137.98	2584	2603	TRUE
Papilin CG33103-PA, isoform A [Drosophila melanogaster]	gi|28572036	312636	1	51	58	438	0.00205	0.228	RVLPEEDCVEEKPETEK	K	S	0.95	65.3	36.4	3.07	0	0	5	2	2087	497	513	TRUE
Papilin CG33103-PA, isoform A [Drosophila melanogaster]	gi|28572036	312636	1	51	58	438	0.00205	0.228	RYFSCNTQDCPEEESDFR	R	A	0.95	31.3	36.2	1.57	0	0	1	2	2339.93	101	118	TRUE
Papilin CG33103-PA, isoform A [Drosophila melanogaster]	gi|28572036	312636	1	51	58	438	0.00205	0.228	SAGPCTGFTK	K	K	0.95	50.5	35.8	0	0	2	0	2	1025.47	1676	1685	TRUE
Papilin CG33103-PA, isoform A [Drosophila melanogaster]	gi|28572036	312636	1	51	58	438	0.00205	0.228	SCSFSEFGCCPDAETSAK	K	G	0.95	134	36.3	0	0	10	0	2	2039.78	1369	1386	TRUE
Papilin CG33103-PA, isoform A [Drosophila melanogaster]	gi|28572036	312636	1	51	58	438	0.00205	0.228	SEDVIDLEGTAK	K	T	0.95	92.2	36.7	0	0	5	0	2	1276.63	733	744	TRUE
Papilin CG33103-PA, isoform A [Drosophila melanogaster]	gi|28572036	312636	1	51	58	438	0.00205	0.228	SEYGCCPDGK	K	S	0.95	63.7	37.1	0	0	2	0	2	1172.44	1252	1261	TRUE
Papilin CG33103-PA, isoform A [Drosophila melanogaster]	gi|28572036	312636	1	51	58	438	0.00205	0.228	SGECHEFEFTGCR	R	G	0.95	57.8	36.7	0	0	1	2	2	1615.63	2150	2162	TRUE
Papilin CG33103-PA, isoform A [Drosophila melanogaster]	gi|28572036	312636	1	51	58	438	0.00205	0.228	SQCAETLFGCCPDK	K	F	0.95	103	36.7	0	0	19	0	2	1672.68	1304	1317	TRUE
Papilin CG33103-PA, isoform A [Drosophila melanogaster]	gi|28572036	312636	1	51	58	438	0.00205	0.228	SVNCDEEKVEPLSEK	K	C	0.95	100	36.5	0	0	6	5	2	1762.82	673	687	TRUE
Papilin CG33103-PA, isoform A [Drosophila melanogaster]	gi|28572036	312636	1	51	58	438	0.00205	0.228	TQAPVVSYPGDAR	R	A	0.95	58.2	36.7	0	0	4	0	2	1360.69	2506	2518	TRUE
Papilin CG33103-PA, isoform A [Drosophila melanogaster]	gi|28572036	312636	1	51	58	438	0.00205	0.228	TVTPADDDSK	K	C	0.95	47.9	37	0	0	2	0	2	1048.48	610	619	TRUE
Papilin CG33103-PA, isoform A [Drosophila melanogaster]	gi|28572036	312636	1	51	58	438	0.00205	0.228	VLPEEDCVEEKPETEK	R	S	0.95	110	36.5	0	0	31	4	2	1930.9	498	513	TRUE
Papilin CG33103-PA, isoform A [Drosophila melanogaster]	gi|28572036	312636	1	51	58	438	0.00205	0.228	VQITYQPHR	R	L	0.95	39.8	36.3	0	0	0	3	2	1141.61	2800	2808	TRUE
Papilin CG33103-PA, isoform A [Drosophila melanogaster]	gi|28572036	312636	1	51	58	438	0.00205	0.228	YFSCNTQDCPEEESDFR	R	A	0.95	112	36.2	0	0	13	0	2	2183.83	102	118	TRUE
Papilin CG33103-PA, isoform A [Drosophila melanogaster]	gi|28572036	312636	1	51	58	438	0.00205	0.228	YGCCLDGVSPAK	K	G	0.95	65.5	36.5	0	0	8	0	2	1326.58	1283	1294	TRUE
Papilin CG33103-PA, isoform A [Drosophila melanogaster]	gi|28572036	312636	1	51	58	438	0.00205	0.228	YYFDTSYGGCAR	K	F	0.95	80.2	36.8	0	0	8	0	2	1459.6	1628	1639	TRUE
Muscle-specific protein 300 CG33715-PD, isoform D [Drosophila melanogaster]	gi|161076705	1.40526e+06	1	45	45	109	0.00051	0.0478	AAALLGSAAPANADEISK	K	A	0.95	40.2	36.6	0	0	1	0	2	1669.88	4238	4255	TRUE
Muscle-specific protein 300 CG33715-PD, isoform D [Drosophila melanogaster]	gi|161076705	1.40526e+06	1	45	45	109	0.00051	0.0478	AETSSQVNLSEVPQK	K	L	0.95	66	36.7	0	0	13	0	2	1616.81	3134	3148	TRUE
Muscle-specific protein 300 CG33715-PD, isoform D [Drosophila melanogaster]	gi|161076705	1.40526e+06	1	45	45	109	0.00051	0.0478	ALQEQQQELAR	K	H	0.95	40.3	36.8	0	0	2	0	2	1313.68	11236	11246	TRUE
Muscle-specific protein 300 CG33715-PD, isoform D [Drosophila melanogaster]	gi|161076705	1.40526e+06	1	45	45	109	0.00051	0.0478	ASLADEFPR	K	V	0.95	36.8	36.8	0	0	1	0	2	1005.5	4758	4766	TRUE
Muscle-specific protein 300 CG33715-PD, isoform D [Drosophila melanogaster]	gi|161076705	1.40526e+06	1	45	45	109	0.00051	0.0478	ATELILK	R	N	0.95	41.7	38.1	0	1	1	0	2	787.493	8721	8727	FALSE	gi|24584704,gi|28574239,gi|24584698
Muscle-specific protein 300 CG33715-PD, isoform D [Drosophila melanogaster]	gi|161076705	1.40526e+06	1	45	45	109	0.00051	0.0478	AVESPQNLAELTSDAELLR	K	K	0.95	94.3	36.4	0	0	2	0	2	2056.06	3069	3087	TRUE
Muscle-specific protein 300 CG33715-PD, isoform D [Drosophila melanogaster]	gi|161076705	1.40526e+06	1	45	45	109	0.00051	0.0478	AVSSDDKIDTAPASQQMQQLNER	K	F	0.95	58.8	36	4.12	0	0	7	2	2532.2	1465	1487	TRUE
Muscle-specific protein 300 CG33715-PD, isoform D [Drosophila melanogaster]	gi|161076705	1.40526e+06	1	45	45	109	0.00051	0.0478	DFNEWFGDAK	K	I	0.95	42	36.7	0	0	1	0	2	1228.53	3226	3235	TRUE
Muscle-specific protein 300 CG33715-PD, isoform D [Drosophila melanogaster]	gi|161076705	1.40526e+06	1	45	45	109	0.00051	0.0478	DLEEIEQVFR	K	R	0.95	47.5	36.9	0	0	2	0	2	1277.64	7880	7889	TRUE
Muscle-specific protein 300 CG33715-PD, isoform D [Drosophila melanogaster]	gi|161076705	1.40526e+06	1	45	45	109	0.00051	0.0478	DMQALQDSFDQIK	K	G	0.95	42.1	36.4	0	0	1	0	2	1554.71	3089	3101	TRUE
Muscle-specific protein 300 CG33715-PD, isoform D [Drosophila melanogaster]	gi|161076705	1.40526e+06	1	45	45	109	0.00051	0.0478	ELQLEQQALNR	K	N	0.95	56.6	37	0	0	3	0	2	1341.71	1622	1632	TRUE
Muscle-specific protein 300 CG33715-PD, isoform D [Drosophila melanogaster]	gi|161076705	1.40526e+06	1	45	45	109	0.00051	0.0478	EMIASGQQSQAAFQAQK	K	V	0.95	74.5	36.5	0	0	2	0	2	1822.88	5098	5114	TRUE
Muscle-specific protein 300 CG33715-PD, isoform D [Drosophila melanogaster]	gi|161076705	1.40526e+06	1	45	45	109	0.00051	0.0478	GAESVLDQR	R	Q	0.95	35.2	37.3	0	0	1	0	2	974.491	1306	1314	TRUE
Muscle-specific protein 300 CG33715-PD, isoform D [Drosophila melanogaster]	gi|161076705	1.40526e+06	1	45	45	109	0.00051	0.0478	GELDNSGNEIDNIK	R	Q	0.95	40.5	36.7	0	0	1	0	2	1517.71	2940	2953	TRUE
Muscle-specific protein 300 CG33715-PD, isoform D [Drosophila melanogaster]	gi|161076705	1.40526e+06	1	45	45	109	0.00051	0.0478	GTQAVWSEFVDQK	K	N	0.95	35.3	36.1	0	0	1	0	2	1494.72	1921	1933	TRUE
Muscle-specific protein 300 CG33715-PD, isoform D [Drosophila melanogaster]	gi|161076705	1.40526e+06	1	45	45	109	0.00051	0.0478	HQLDKPEGPAAEELSK	K	V	0.95	0	0	3.14	0	0	1	2	1748.88	2480	2495	TRUE
Muscle-specific protein 300 CG33715-PD, isoform D [Drosophila melanogaster]	gi|161076705	1.40526e+06	1	45	45	109	0.00051	0.0478	IDDLINDLR	R	D	0.95	67.1	37.3	0	0	2	0	2	1086.58	653	661	TRUE
Muscle-specific protein 300 CG33715-PD, isoform D [Drosophila melanogaster]	gi|161076705	1.40526e+06	1	45	45	109	0.00051	0.0478	IIQEEQQLR	R	L	0.95	51.5	36.9	0	0	2	0	2	1156.63	8318	8326	TRUE
Muscle-specific protein 300 CG33715-PD, isoform D [Drosophila melanogaster]	gi|161076705	1.40526e+06	1	45	45	109	0.00051	0.0478	ILQGELPEGAQK	K	L	0.95	46.2	36.5	0	0	3	0	2	1282.7	5620	5631	TRUE
Muscle-specific protein 300 CG33715-PD, isoform D [Drosophila melanogaster]	gi|161076705	1.40526e+06	1	45	45	109	0.00051	0.0478	INEIQDALPEGVAK	K	L	0.95	60	36.2	0	0	2	0	2	1496.8	4326	4339	TRUE
Muscle-specific protein 300 CG33715-PD, isoform D [Drosophila melanogaster]	gi|161076705	1.40526e+06	1	45	45	109	0.00051	0.0478	IQECEGVLASANDK	K	G	0.95	83.6	36.5	0	0	3	0	2	1533.72	7393	7406	TRUE
Muscle-specific protein 300 CG33715-PD, isoform D [Drosophila melanogaster]	gi|161076705	1.40526e+06	1	45	45	109	0.00051	0.0478	KAEDLYNAIPQQPR	K	D	0.95	37.8	36.4	0	0	1	0	2	1642.86	2692	2705	TRUE
Muscle-specific protein 300 CG33715-PD, isoform D [Drosophila melanogaster]	gi|161076705	1.40526e+06	1	45	45	109	0.00051	0.0478	LAELQEWANK	R	V	0.95	43.5	37	0	0	1	0	2	1201.62	2043	2052	TRUE
Muscle-specific protein 300 CG33715-PD, isoform D [Drosophila melanogaster]	gi|161076705	1.40526e+06	1	45	45	109	0.00051	0.0478	LAQLEEIFK	R	L	0.95	52	36.8	0	0	2	0	2	1090.62	5898	5906	TRUE
Muscle-specific protein 300 CG33715-PD, isoform D [Drosophila melanogaster]	gi|161076705	1.40526e+06	1	45	45	109	0.00051	0.0478	LDENAFYQSLK	R	D	0.95	36.7	36.7	0	0	1	0	2	1327.65	1607	1617	TRUE
Muscle-specific protein 300 CG33715-PD, isoform D [Drosophila melanogaster]	gi|161076705	1.40526e+06	1	45	45	109	0.00051	0.0478	LETAFDVAESK	R	L	0.95	37.9	36.2	0	0	1	0	2	1209.6	838	848	TRUE
Muscle-specific protein 300 CG33715-PD, isoform D [Drosophila melanogaster]	gi|161076705	1.40526e+06	1	45	45	109	0.00051	0.0478	LFSAIGEPIPQEVPQEVTAAK	K	Q	0.95	82.2	36.2	0	0	2	0	2	2224.19	2744	2764	TRUE
Muscle-specific protein 300 CG33715-PD, isoform D [Drosophila melanogaster]	gi|161076705	1.40526e+06	1	45	45	109	0.00051	0.0478	LIEDQLAHLR	K	Q	0.95	56.7	36.9	0	0	1	0	2	1207.68	7333	7342	TRUE
Muscle-specific protein 300 CG33715-PD, isoform D [Drosophila melanogaster]	gi|161076705	1.40526e+06	1	45	45	109	0.00051	0.0478	MGSPGSSSATAQQLQTVK	R	N	0.95	90	36.5	0	0	2	0	2	1777.88	3244	3261	TRUE
Muscle-specific protein 300 CG33715-PD, isoform D [Drosophila melanogaster]	gi|161076705	1.40526e+06	1	45	45	109	0.00051	0.0478	NEDVDSILQR	R	N	0.95	49	37.2	0	0	2	0	2	1188.59	1633	1642	TRUE
Muscle-specific protein 300 CG33715-PD, isoform D [Drosophila melanogaster]	gi|161076705	1.40526e+06	1	45	45	109	0.00051	0.0478	NQVTQVEEINPER	R	V	0.95	64.5	36.5	0	0	1	0	2	1555.77	2377	2389	TRUE
Muscle-specific protein 300 CG33715-PD, isoform D [Drosophila melanogaster]	gi|161076705	1.40526e+06	1	45	45	109	0.00051	0.0478	NYDSLQNEIADR	K	I	0.95	72.1	36.3	0	0	1	0	2	1437.66	2654	2665	TRUE
Muscle-specific protein 300 CG33715-PD, isoform D [Drosophila melanogaster]	gi|161076705	1.40526e+06	1	45	45	109	0.00051	0.0478	QLDLLAADASELAPK	K	E	0.95	61.4	36.3	0	0	4	0	2	1554.84	2088	2102	TRUE
Muscle-specific protein 300 CG33715-PD, isoform D [Drosophila melanogaster]	gi|161076705	1.40526e+06	1	45	45	109	0.00051	0.0478	QQQPGDISLDQAYDNAK	R	S	0.95	51.3	36.4	0	0	1	0	2	1890.88	1672	1688	TRUE
Muscle-specific protein 300 CG33715-PD, isoform D [Drosophila melanogaster]	gi|161076705	1.40526e+06	1	45	45	109	0.00051	0.0478	QSLADVLEK	K	R	0.95	37.7	37.3	0	0	2	0	2	1002.55	6977	6985	TRUE
Muscle-specific protein 300 CG33715-PD, isoform D [Drosophila melanogaster]	gi|161076705	1.40526e+06	1	45	45	109	0.00051	0.0478	TEYVDGVDEVQR	R	W	0.95	79.7	36.4	0	0	3	0	2	1409.65	7991	8002	TRUE
Muscle-specific protein 300 CG33715-PD, isoform D [Drosophila melanogaster]	gi|161076705	1.40526e+06	1	45	45	109	0.00051	0.0478	TNEIVGDQSVLQDQQNK	K	L	0.95	46.1	36.6	0	0	1	0	2	1915.94	3666	3682	TRUE
Muscle-specific protein 300 CG33715-PD, isoform D [Drosophila melanogaster]	gi|161076705	1.40526e+06	1	45	45	109	0.00051	0.0478	TSDEFLNDLSEK	K	R	0.95	62.2	36.4	0	0	2	0	2	1397.64	5924	5935	TRUE
Muscle-specific protein 300 CG33715-PD, isoform D [Drosophila melanogaster]	gi|161076705	1.40526e+06	1	45	45	109	0.00051	0.0478	VIPGTVDVGQVNIK	K	S	0.95	49.6	36.3	0	0	4	0	2	1438.83	4777	4790	TRUE
Muscle-specific protein 300 CG33715-PD, isoform D [Drosophila melanogaster]	gi|161076705	1.40526e+06	1	45	45	109	0.00051	0.0478	VKDQTANIPAPDSLDR	K	V	0.95	40.6	36.2	0	0	1	0	2	1739.89	1837	1852	TRUE
Muscle-specific protein 300 CG33715-PD, isoform D [Drosophila melanogaster]	gi|161076705	1.40526e+06	1	45	45	109	0.00051	0.0478	VLDTFDELFAK	K	T	0.95	77.1	36.5	0	0	3	0	2	1297.67	5115	5125	TRUE
Muscle-specific protein 300 CG33715-PD, isoform D [Drosophila melanogaster]	gi|161076705	1.40526e+06	1	45	45	109	0.00051	0.0478	VPTTDELYPTLATK	K	K	0.95	82.5	36.7	0	0	15	0	2	1548.82	3349	3362	TRUE
Muscle-specific protein 300 CG33715-PD, isoform D [Drosophila melanogaster]	gi|161076705	1.40526e+06	1	45	45	109	0.00051	0.0478	YDDCCDLSTVASR	R	D	0.95	67.1	36.6	0	0	4	0	2	1561.63	4520	4532	TRUE
Muscle-specific protein 300 CG33715-PD, isoform D [Drosophila melanogaster]	gi|161076705	1.40526e+06	1	45	45	109	0.00051	0.0478	YQLLQVLSK	R	E	0.95	46.2	36.8	0	0	1	0	2	1091.65	4050	4058	TRUE
Laminin A CG10236-PA [Drosophila melanogaster]	gi|17136292	411103	1	44	48	274	0.00128	0.16	AATAYSGIVEAVEAAQK	K	L	0.95	93.3	36.4	0	0	11	0	2	1678.87	2455	2471	TRUE
Laminin A CG10236-PA [Drosophila melanogaster]	gi|17136292	411103	1	44	48	274	0.00128	0.16	ADKDTSNGLLFFYGR	K	D	0.95	35.7	36.6	1.47	0	0	2	2	1703.84	2907	2921	TRUE
Laminin A CG10236-PA [Drosophila melanogaster]	gi|17136292	411103	1	44	48	274	0.00128	0.16	AHLADTGSTDLLQR	R	A	0.95	38.5	36.4	0	0	2	0	2	1497.77	2494	2507	TRUE
Laminin A CG10236-PA [Drosophila melanogaster]	gi|17136292	411103	1	44	48	274	0.00128	0.16	ANSELESDAK	K	S	0.95	61.7	36.9	0	0	1	0	2	1063.49	2180	2189	TRUE
Laminin A CG10236-PA [Drosophila melanogaster]	gi|17136292	411103	1	44	48	274	0.00128	0.16	AQDLAAQYTDMTASAEPAIK	K	A	0.95	155	36.3	0	0	17	0	2	2095	2435	2454	TRUE
Laminin A CG10236-PA [Drosophila melanogaster]	gi|17136292	411103	1	44	48	274	0.00128	0.16	DAGNFLINGDLTLNQINQK	K	L	0.95	81.8	36.2	0	0	1	0	2	2088.07	2367	2385	TRUE
Laminin A CG10236-PA [Drosophila melanogaster]	gi|17136292	411103	1	44	48	274	0.00128	0.16	DALNELNSFNK	R	N	0.95	64.1	36.6	0	0	9	0	2	1264.62	2391	2401	TRUE
Laminin A CG10236-PA [Drosophila melanogaster]	gi|17136292	411103	1	44	48	274	0.00128	0.16	DDDVICTTEYSK	R	I	0.95	77.3	36.8	0	0	13	0	2	1445.61	183	194	TRUE
Laminin A CG10236-PA [Drosophila melanogaster]	gi|17136292	411103	1	44	48	274	0.00128	0.16	DGTFDLDSASLFGCK	R	D	0.95	113	36.6	0	0	5	0	2	1632.72	769	783	TRUE
Laminin A CG10236-PA [Drosophila melanogaster]	gi|17136292	411103	1	44	48	274	0.00128	0.16	DPNGLLFSVHGK	R	N	0.95	73.3	36.7	0	0	4	0	2	1283.67	3567	3578	TRUE
Laminin A CG10236-PA [Drosophila melanogaster]	gi|17136292	411103	1	44	48	274	0.00128	0.16	EAIASVEALSK	K	N	0.95	67.5	37.3	0	0	10	0	2	1117.61	2232	2242	TRUE
Laminin A CG10236-PA [Drosophila melanogaster]	gi|17136292	411103	1	44	48	274	0.00128	0.16	EDLQPVIISADIEDGSR	K	F	0.95	114	36.4	0	0	8	0	2	1856.92	1124	1140	TRUE
Laminin A CG10236-PA [Drosophila melanogaster]	gi|17136292	411103	1	44	48	274	0.00128	0.16	FAGCGSVPVGELCK	K	C	0.95	90.3	36.2	0	0	15	0	2	1480.69	688	701	TRUE
Laminin A CG10236-PA [Drosophila melanogaster]	gi|17136292	411103	1	44	48	274	0.00128	0.16	FDTVSEQK	K	L	0.95	50.1	35.6	0	0	2	0	2	953.458	2351	2358	TRUE
Laminin A CG10236-PA [Drosophila melanogaster]	gi|17136292	411103	1	44	48	274	0.00128	0.16	HISNPCELGNMELCR	R	H	0.95	36.5	36.5	2.09	0	0	1	2	1845.8	980	994	TRUE
Laminin A CG10236-PA [Drosophila melanogaster]	gi|17136292	411103	1	44	48	274	0.00128	0.16	IATNKPPYASLDER	R	V	0.95	61.3	36.5	2.08	0	1	10	2	1574.82	1196	1209	TRUE
Laminin A CG10236-PA [Drosophila melanogaster]	gi|17136292	411103	1	44	48	274	0.00128	0.16	IFDHFDVGTEMK	K	I	0.95	46.8	36.4	0	0	1	1	2	1454.66	3547	3558	TRUE
Laminin A CG10236-PA [Drosophila melanogaster]	gi|17136292	411103	1	44	48	274	0.00128	0.16	IGSITNDCNVTTGECK	K	C	0.95	79.7	36.4	0	0	5	0	2	1768.78	500	515	TRUE
Laminin A CG10236-PA [Drosophila melanogaster]	gi|17136292	411103	1	44	48	274	0.00128	0.16	ILNDGEDHVVTVQHTQGELR	R	L	0.95	82.4	36.1	4.34	0	1	11	2	2260.13	3128	3147	TRUE
Laminin A CG10236-PA [Drosophila melanogaster]	gi|17136292	411103	1	44	48	274	0.00128	0.16	IYATATCGQDTDGPELYCK	K	L	0.95	83.4	36.1	0	0	7	0	2	2162.94	37	55	TRUE
Laminin A CG10236-PA [Drosophila melanogaster]	gi|17136292	411103	1	44	48	274	0.00128	0.16	LEQPGSVDLNAER	K	S	0.95	99	36.8	0	0	15	0	2	1427.71	3453	3465	TRUE
Laminin A CG10236-PA [Drosophila melanogaster]	gi|17136292	411103	1	44	48	274	0.00128	0.16	LIDQLPAESQR	K	D	0.95	72.2	36.6	0	0	25	0	2	1269.68	2550	2560	TRUE
Laminin A CG10236-PA [Drosophila melanogaster]	gi|17136292	411103	1	44	48	274	0.00128	0.16	LLDPNSVDLSPSK	K	K	0.95	61	36.9	0	0	6	0	2	1384.73	2166	2178	TRUE
Laminin A CG10236-PA [Drosophila melanogaster]	gi|17136292	411103	1	44	48	274	0.00128	0.16	LNSMGSQLVIDDR	K	I	0.95	82.2	36.5	0	0	10	0	2	1447.72	3115	3127	TRUE
Laminin A CG10236-PA [Drosophila melanogaster]	gi|17136292	411103	1	44	48	274	0.00128	0.16	LNYYDQLADELEPK	K	V	0.95	78	36.5	0	0	3	0	2	1710.82	2150	2163	TRUE
Laminin A CG10236-PA [Drosophila melanogaster]	gi|17136292	411103	1	44	48	274	0.00128	0.16	LPEQPNFDVDFTEAGYR	K	F	0.95	33.8	36.1	0	0	1	0	2	1997.92	3335	3351	TRUE
Laminin A CG10236-PA [Drosophila melanogaster]	gi|17136292	411103	1	44	48	274	0.00128	0.16	LQINSLPVK	R	V	0.95	48.4	36	0	0	9	0	2	1011.62	3360	3368	TRUE
Laminin A CG10236-PA [Drosophila melanogaster]	gi|17136292	411103	1	44	48	274	0.00128	0.16	LYEEVNTLVLPIK	K	A	0.95	64	36.7	0	0	1	0	2	1530.88	2286	2298	TRUE
Laminin A CG10236-PA [Drosophila melanogaster]	gi|17136292	411103	1	44	48	274	0.00128	0.16	NFPDSYYINLK	R	L	0.95	45.8	36.8	0	0	1	0	2	1373.67	1074	1084	TRUE
Laminin A CG10236-PA [Drosophila melanogaster]	gi|17136292	411103	1	44	48	274	0.00128	0.16	NVDEELPVR	K	E	0.95	59.4	36.4	0	0	5	0	2	1070.55	2402	2410	TRUE
Laminin A CG10236-PA [Drosophila melanogaster]	gi|17136292	411103	1	44	48	274	0.00128	0.16	NVLEILEPVSVQTPK	K	E	0.95	127	36.4	0	0	12	0	2	1665.94	2579	2593	TRUE
Laminin A CG10236-PA [Drosophila melanogaster]	gi|17136292	411103	1	44	48	274	0.00128	0.16	QCAEGYYGFPECK	K	A	0.95	45.3	36.4	0	0	1	0	2	1608.65	481	493	TRUE
Laminin A CG10236-PA [Drosophila melanogaster]	gi|17136292	411103	1	44	48	274	0.00128	0.16	QLDDVEGSVSK	K	L	0.95	51.7	36.9	0	0	3	0	2	1176.58	2618	2628	TRUE
Laminin A CG10236-PA [Drosophila melanogaster]	gi|17136292	411103	1	44	48	274	0.00128	0.16	QYNDDLLVEETFDQTK	K	E	0.95	74.1	36.3	0	0	2	0	2	1957.9	1321	1336	TRUE
Laminin A CG10236-PA [Drosophila melanogaster]	gi|17136292	411103	1	44	48	274	0.00128	0.16	SAPVLAVELPIYLGGVNK	R	F	0.95	108	36.4	0	0	3	0	2	1840.06	3466	3483	TRUE
Laminin A CG10236-PA [Drosophila melanogaster]	gi|17136292	411103	1	44	48	274	0.00128	0.16	SGYLEGSQNILHVDK	K	N	0.95	71.8	36.5	0	0	3	4	2	1659.83	2794	2808	TRUE
Laminin A CG10236-PA [Drosophila melanogaster]	gi|17136292	411103	1	44	48	274	0.00128	0.16	TEVPYFNGCLK	K	N	0.95	42.4	36.9	0	0	3	0	2	1327.64	3497	3507	TRUE
Laminin A CG10236-PA [Drosophila melanogaster]	gi|17136292	411103	1	44	48	274	0.00128	0.16	TNAPLEADLELPK	R	L	0.95	86.6	36.3	0	0	13	0	2	1410.75	2984	2996	TRUE
Laminin A CG10236-PA [Drosophila melanogaster]	gi|17136292	411103	1	44	48	274	0.00128	0.16	TSVNEDGMEK	R	S	0.95	43.3	36	0	0	1	0	2	1109.48	1108	1117	TRUE
Laminin A CG10236-PA [Drosophila melanogaster]	gi|17136292	411103	1	44	48	274	0.00128	0.16	VDDIVISR	K	T	0.95	80	37.5	0	0	2	0	2	916.51	2976	2983	TRUE
Laminin A CG10236-PA [Drosophila melanogaster]	gi|17136292	411103	1	44	48	274	0.00128	0.16	VGAQLQAK	R	I	0.95	60.8	37	0	0	1	0	2	814.479	3415	3422	TRUE
Laminin A CG10236-PA [Drosophila melanogaster]	gi|17136292	411103	1	44	48	274	0.00128	0.16	VNIVESNFQTISGKPVSR	R	A	0.95	28	36.3	2.1	0	0	1	2	1975.06	1705	1722	TRUE
Laminin A CG10236-PA [Drosophila melanogaster]	gi|17136292	411103	1	44	48	274	0.00128	0.16	YDYDEAAFPGFSSK	R	G	0.95	103	36.5	0	0	10	0	2	1596.69	847	860	TRUE
alpha Spectrin CG1977-PA [Drosophila melanogaster]	gi|17136504	278289	1	40	44	127	0.000594	0.207	ALDIFATK	K	L	0.95	64.2	36.7	0	0	1	0	2	878.499	528	535	TRUE
alpha Spectrin CG1977-PA [Drosophila melanogaster]	gi|17136504	278289	1	40	44	127	0.000594	0.207	CSLICDQGSELVEAK	R	N	0.95	81.5	36.4	0	0	2	0	2	1708.79	1874	1888	TRUE
alpha Spectrin CG1977-PA [Drosophila melanogaster]	gi|17136504	278289	1	40	44	127	0.000594	0.207	DADEIENWIAEK	R	L	0.95	64.2	36.7	0	0	1	0	2	1432.66	1507	1518	TRUE
alpha Spectrin CG1977-PA [Drosophila melanogaster]	gi|17136504	278289	1	40	44	127	0.000594	0.207	DADETVAWIAEK	R	D	0.95	84.9	36.8	0	0	2	0	2	1347.64	266	277	TRUE
alpha Spectrin CG1977-PA [Drosophila melanogaster]	gi|17136504	278289	1	40	44	127	0.000594	0.207	DALDYIDFTR	K	T	0.95	61.2	36.7	0	0	5	0	2	1228.59	2401	2410	TRUE
alpha Spectrin CG1977-PA [Drosophila melanogaster]	gi|17136504	278289	1	40	44	127	0.000594	0.207	DCELAESWMSAR	R	E	0.95	64.7	36.3	0	0	1	0	2	1454.6	1401	1412	TRUE
alpha Spectrin CG1977-PA [Drosophila melanogaster]	gi|17136504	278289	1	40	44	127	0.000594	0.207	DIADEESWIK	R	E	0.95	47.4	37.1	0	0	2	0	2	1205.57	1720	1729	TRUE
alpha Spectrin CG1977-PA [Drosophila melanogaster]	gi|17136504	278289	1	40	44	127	0.000594	0.207	DLASVQNLMK	K	K	0.95	51.7	37.2	0	0	2	0	2	1118.59	1637	1646	TRUE
alpha Spectrin CG1977-PA [Drosophila melanogaster]	gi|17136504	278289	1	40	44	127	0.000594	0.207	DLEDEAAWIR	R	E	0.95	60.8	37.2	0	0	5	0	2	1217.58	795	804	TRUE
alpha Spectrin CG1977-PA [Drosophila melanogaster]	gi|17136504	278289	1	40	44	127	0.000594	0.207	DLIGVQNLIK	R	K	0.95	63.1	36.4	0	0	2	0	2	1112.67	818	827	TRUE
alpha Spectrin CG1977-PA [Drosophila melanogaster]	gi|17136504	278289	1	40	44	127	0.000594	0.207	DLSTVQTLLTK	R	Q	0.95	70.5	37.1	0	0	7	0	2	1218.69	1955	1965	TRUE
alpha Spectrin CG1977-PA [Drosophila melanogaster]	gi|17136504	278289	1	40	44	127	0.000594	0.207	DLTSVQNLQK	K	K	0.95	52.3	37.1	0	0	4	0	2	1145.62	712	721	TRUE
alpha Spectrin CG1977-PA [Drosophila melanogaster]	gi|17136504	278289	1	40	44	127	0.000594	0.207	DQPFASDDIR	K	Q	0.95	41.2	37.2	0	0	3	0	2	1163.53	856	865	TRUE
alpha Spectrin CG1977-PA [Drosophila melanogaster]	gi|17136504	278289	1	40	44	127	0.000594	0.207	DVAGAEALLER	K	H	0.95	80.8	37.2	0	0	8	0	2	1143.6	395	405	TRUE
alpha Spectrin CG1977-PA [Drosophila melanogaster]	gi|17136504	278289	1	40	44	127	0.000594	0.207	DVVLSSDDYGR	K	D	0.95	36.2	36.2	0	0	1	0	2	1225.57	278	288	TRUE
alpha Spectrin CG1977-PA [Drosophila melanogaster]	gi|17136504	278289	1	40	44	127	0.000594	0.207	EAFLNADDDANAGGNVEALIK	R	K	0.95	127	36.3	0	0	1	0	2	2147.03	1413	1433	TRUE
alpha Spectrin CG1977-PA [Drosophila melanogaster]	gi|17136504	278289	1	40	44	127	0.000594	0.207	ECVVALYDYTEK	K	S	0.95	52.2	36.5	0	0	3	0	2	1489.69	973	984	TRUE
alpha Spectrin CG1977-PA [Drosophila melanogaster]	gi|17136504	278289	1	40	44	127	0.000594	0.207	ETENVQSYEEIENAFR	K	A	0.95	102	36.3	0	0	5	0	2	1957.88	2341	2356	TRUE
alpha Spectrin CG1977-PA [Drosophila melanogaster]	gi|17136504	278289	1	40	44	127	0.000594	0.207	FATDDSYLDPTNLNGK	K	M	0.95	37	36.6	0	0	1	0	2	1770.82	598	613	TRUE
alpha Spectrin CG1977-PA [Drosophila melanogaster]	gi|17136504	278289	1	40	44	127	0.000594	0.207	FIESGHFDADNIR	K	N	0.95	80.1	36.8	0	0	5	1	2	1520.71	747	759	TRUE
alpha Spectrin CG1977-PA [Drosophila melanogaster]	gi|17136504	278289	1	40	44	127	0.000594	0.207	GDVLTLLNSNNK	K	D	0.95	43	37	0	0	1	0	2	1287.69	994	1005	TRUE
alpha Spectrin CG1977-PA [Drosophila melanogaster]	gi|17136504	278289	1	40	44	127	0.000594	0.207	HALLEADVMAHQDR	K	I	0.95	37.1	36.4	0	0	0	1	2	1605.78	723	736	TRUE
alpha Spectrin CG1977-PA [Drosophila melanogaster]	gi|17136504	278289	1	40	44	127	0.000594	0.207	HQLVEADIVAHEDR	K	I	0.95	56.7	36.7	5.36	0	0	6	2	1631.81	1648	1661	TRUE
alpha Spectrin CG1977-PA [Drosophila melanogaster]	gi|17136504	278289	1	40	44	127	0.000594	0.207	ILETVEDIQER	K	R	0.95	80.7	37	0	0	13	0	2	1344.7	11	21	TRUE
alpha Spectrin CG1977-PA [Drosophila melanogaster]	gi|17136504	278289	1	40	44	127	0.000594	0.207	LDESYYLHR	K	F	0.95	59.2	36.1	0	0	1	0	2	1195.57	360	368	TRUE
alpha Spectrin CG1977-PA [Drosophila melanogaster]	gi|17136504	278289	1	40	44	127	0.000594	0.207	LEAELGSHEPAIQAVQEAGEK	R	L	0.95	41.2	36.1	1.8	0	0	1	2	2206.1	1757	1777	TRUE
alpha Spectrin CG1977-PA [Drosophila melanogaster]	gi|17136504	278289	1	40	44	127	0.000594	0.207	LGDEQTLQQFSR	R	D	0.95	86.1	36.5	0	0	5	0	2	1421.7	1495	1506	TRUE
alpha Spectrin CG1977-PA [Drosophila melanogaster]	gi|17136504	278289	1	40	44	127	0.000594	0.207	LIDGQHYAADDVAQR	K	R	0.95	65.5	36.6	2.36	0	1	12	2	1671.81	536	550	TRUE
alpha Spectrin CG1977-PA [Drosophila melanogaster]	gi|17136504	278289	1	40	44	127	0.000594	0.207	LLDSYDLQR	K	F	0.95	64.7	36	0	0	3	0	2	1122.58	1283	1291	TRUE
alpha Spectrin CG1977-PA [Drosophila melanogaster]	gi|17136504	278289	1	40	44	127	0.000594	0.207	LLNVISSGENMLK	R	D	0.95	65.1	36.7	0	0	1	0	2	1417.77	843	855	TRUE
alpha Spectrin CG1977-PA [Drosophila melanogaster]	gi|17136504	278289	1	40	44	127	0.000594	0.207	LLVGSDDYGR	K	D	0.95	38.6	35.9	0	0	1	0	2	1094.55	1733	1742	TRUE
alpha Spectrin CG1977-PA [Drosophila melanogaster]	gi|17136504	278289	1	40	44	127	0.000594	0.207	LNEACQQQQFNR	K	T	0.95	37.4	36.2	0	0	1	0	2	1535.7	677	688	TRUE
alpha Spectrin CG1977-PA [Drosophila melanogaster]	gi|17136504	278289	1	40	44	127	0.000594	0.207	LQAASEESYRDPTNLQAK	K	I	0.95	54	36.3	0	0	1	7	2	2020.99	67	84	TRUE
alpha Spectrin CG1977-PA [Drosophila melanogaster]	gi|17136504	278289	1	40	44	127	0.000594	0.207	LQLATEESYKDPANIQSK	K	H	0.95	46.5	36.3	0	0	1	1	2	2035.04	1519	1536	TRUE
alpha Spectrin CG1977-PA [Drosophila melanogaster]	gi|17136504	278289	1	40	44	127	0.000594	0.207	QAEIANYWQSLTTK	K	A	0.95	86.3	36.3	0	0	3	0	2	1652.83	339	352	TRUE
alpha Spectrin CG1977-PA [Drosophila melanogaster]	gi|17136504	278289	1	40	44	127	0.000594	0.207	QQETPVVDITGK	R	E	0.95	40.4	36.9	0	0	1	0	2	1314.69	961	972	TRUE
alpha Spectrin CG1977-PA [Drosophila melanogaster]	gi|17136504	278289	1	40	44	127	0.000594	0.207	VSTLGAEAQR	K	L	0.95	36.7	37.3	0	0	1	0	2	1031.55	314	323	TRUE
alpha Spectrin CG1977-PA [Drosophila melanogaster]	gi|17136504	278289	1	40	44	127	0.000594	0.207	YAALAAPMGER	R	K	0.95	36.5	36.7	0	0	1	0	2	1149.57	769	779	TRUE
Paramyosin CG5939-PA, isoform A [Drosophila melanogaster]	gi|24661112,gi|24661116	102322	1	39	51	578	0.0027	0.494	ADLSVQVIQMSER	K	L	0.95	40.5	36.5	0	0	1	0	2	1491.75	66	78	TRUE
Paramyosin CG5939-PA, isoform A [Drosophila melanogaster]	gi|24661112,gi|24661116	102322	1	39	51	578	0.0027	0.494	ADTAESSLNIIR	R	A	0.95	96.2	37	0	0	30	0	2	1289.67	840	851	TRUE	gi|24661124,gi|24661120
Paramyosin CG5939-PA, isoform A [Drosophila melanogaster]	gi|24661112,gi|24661116	102322	1	39	51	578	0.0027	0.494	AEEVEEIR	R	R	0.95	41.5	37.4	0	0	1	0	2	974.48	312	319	TRUE
Paramyosin CG5939-PA, isoform A [Drosophila melanogaster]	gi|24661112,gi|24661116	102322	1	39	51	578	0.0027	0.494	ATSTGPGTADVNIEYIQDLSSLSR	R	L	0.95	131	35.9	0	0	4	0	2	2495.23	16	39	TRUE
Paramyosin CG5939-PA, isoform A [Drosophila melanogaster]	gi|24661112,gi|24661116	102322	1	39	51	578	0.0027	0.494	DLELELEEEK	R	R	0.95	60	36.7	0	0	2	0	2	1246.61	751	760	TRUE	gi|24661124,gi|24661120
Paramyosin CG5939-PA, isoform A [Drosophila melanogaster]	gi|24661112,gi|24661116	102322	1	39	51	578	0.0027	0.494	EVLVQCEEDQK	K	N	0.95	73.3	36.7	0	0	15	0	2	1376.64	779	789	TRUE	gi|24661124,gi|24661120
Paramyosin CG5939-PA, isoform A [Drosophila melanogaster]	gi|24661112,gi|24661116	102322	1	39	51	578	0.0027	0.494	GAINELNR	K	R	0.95	51.1	37.3	0	0	2	0	2	886.475	443	450	TRUE
Paramyosin CG5939-PA, isoform A [Drosophila melanogaster]	gi|24661112,gi|24661116	102322	1	39	51	578	0.0027	0.494	HVVEQVHEEQER	K	I	0.95	73.7	36.8	0	0	1	8	2	1518.73	694	705	TRUE	gi|24661124,gi|24661120
Paramyosin CG5939-PA, isoform A [Drosophila melanogaster]	gi|24661112,gi|24661116	102322	1	39	51	578	0.0027	0.494	INELTTANVSLVSIK	R	S	0.95	70	36.9	0	0	7	0	2	1601.91	643	657	TRUE	gi|24661124,gi|24661120
Paramyosin CG5939-PA, isoform A [Drosophila melanogaster]	gi|24661112,gi|24661116	102322	1	39	51	578	0.0027	0.494	IRDLELELEEEK	R	R	0.95	82.1	36.6	0	0	14	0	2	1515.79	749	760	TRUE	gi|24661124,gi|24661120
Paramyosin CG5939-PA, isoform A [Drosophila melanogaster]	gi|24661112,gi|24661116	102322	1	39	51	578	0.0027	0.494	ITELEEHIESLIVK	R	V	0.95	40.7	36.3	0	0	1	1	2	1652.91	326	339	TRUE
Paramyosin CG5939-PA, isoform A [Drosophila melanogaster]	gi|24661112,gi|24661116	102322	1	39	51	578	0.0027	0.494	KLGDDLHEAK	K	G	0.95	55.4	35.8	0	0	2	5	2	1125.59	433	442	TRUE
Paramyosin CG5939-PA, isoform A [Drosophila melanogaster]	gi|24661112,gi|24661116	102322	1	39	51	578	0.0027	0.494	LAADFNQYR	R	H	0.95	62.6	36.1	0	0	31	0	2	1097.54	490	498	TRUE
Paramyosin CG5939-PA, isoform A [Drosophila melanogaster]	gi|24661112,gi|24661116	102322	1	39	51	578	0.0027	0.494	LAEKDEEIEAIR	R	K	0.95	82.1	36.7	0	0	17	13	2	1415.74	505	516	TRUE
Paramyosin CG5939-PA, isoform A [Drosophila melanogaster]	gi|24661112,gi|24661116	102322	1	39	51	578	0.0027	0.494	LAGLNGELEEVR	R	S	0.95	92	36.8	0	0	18	0	2	1299.69	608	619	TRUE	gi|24661124,gi|24661120
Paramyosin CG5939-PA, isoform A [Drosophila melanogaster]	gi|24661112,gi|24661116	102322	1	39	51	578	0.0027	0.494	LEEAEGGAEHQFEANR	R	K	0.95	115	36.7	0	0	36	37	2	1786.8	79	94	TRUE
Paramyosin CG5939-PA, isoform A [Drosophila melanogaster]	gi|24661112,gi|24661116	102322	1	39	51	578	0.0027	0.494	LEEVELNAVAGSK	R	R	0.95	115	37	0	1	26	0	2	1358.72	727	739	TRUE	gi|24661124,gi|24661120
Paramyosin CG5939-PA, isoform A [Drosophila melanogaster]	gi|24661112,gi|24661116	102322	1	39	51	578	0.0027	0.494	LENERDELTAAYK	R	E	0.95	62.7	36.4	0	0	9	11	2	1551.77	462	474	TRUE
Paramyosin CG5939-PA, isoform A [Drosophila melanogaster]	gi|24661112,gi|24661116	102322	1	39	51	578	0.0027	0.494	LEQELSVVASDYEEVSK	K	E	0.95	101	36.3	0	0	2	1	2	1924.94	660	676	TRUE	gi|24661124,gi|24661120
Paramyosin CG5939-PA, isoform A [Drosophila melanogaster]	gi|24661112,gi|24661116	102322	1	39	51	578	0.0027	0.494	LEVSISELNVK	K	I	0.95	76.3	36.9	0	0	7	0	2	1230.69	181	191	TRUE
Paramyosin CG5939-PA, isoform A [Drosophila melanogaster]	gi|24661112,gi|24661116	102322	1	39	51	578	0.0027	0.494	LLQDDLEVER	R	E	0.95	73.8	36.9	0	0	26	0	2	1229.64	46	55	TRUE
Paramyosin CG5939-PA, isoform A [Drosophila melanogaster]	gi|24661112,gi|24661116	102322	1	39	51	578	0.0027	0.494	LSQENIELTK	R	D	0.95	66.9	37.1	0	0	19	0	2	1174.63	209	218	TRUE
Paramyosin CG5939-PA, isoform A [Drosophila melanogaster]	gi|24661112,gi|24661116	102322	1	39	51	578	0.0027	0.494	NLILLQDALDK	K	S	0.95	91.7	36.5	0	0	20	0	2	1255.73	790	800	TRUE	gi|24661124,gi|24661120
Paramyosin CG5939-PA, isoform A [Drosophila melanogaster]	gi|24661112,gi|24661116	102322	1	39	51	578	0.0027	0.494	NQLEEESEAR	R	I	0.95	63.2	36.9	0	0	3	0	2	1204.54	274	283	TRUE
Paramyosin CG5939-PA, isoform A [Drosophila melanogaster]	gi|24661112,gi|24661116	102322	1	39	51	578	0.0027	0.494	QLQATLDQYAVAQR	R	R	0.95	109	36.4	0	0	18	0	2	1604.84	593	606	TRUE	gi|24661124,gi|24661120
Paramyosin CG5939-PA, isoform A [Drosophila melanogaster]	gi|24661112,gi|24661116	102322	1	39	51	578	0.0027	0.494	QLSEQEGVSQQTTTR	R	V	0.95	124	36.4	0	0	31	3	2	1691.82	811	825	TRUE	gi|24661124,gi|24661120
Paramyosin CG5939-PA, isoform A [Drosophila melanogaster]	gi|24661112,gi|24661116	102322	1	39	51	578	0.0027	0.494	QSLQLTELQAHYEDVQR	K	Q	0.95	91.5	36.3	0	0	7	2	2	2058.03	576	592	TRUE	gi|24661124,gi|24661120
Paramyosin CG5939-PA, isoform A [Drosophila melanogaster]	gi|24661112,gi|24661116	102322	1	39	51	578	0.0027	0.494	QTSIEIEQLNAR	K	V	0.95	92.3	36.7	0	0	26	0	2	1401.73	518	529	TRUE	gi|24661124,gi|24661120
Paramyosin CG5939-PA, isoform A [Drosophila melanogaster]	gi|24661112,gi|24661116	102322	1	39	51	578	0.0027	0.494	RLENERDELTAAYK	R	E	0.95	58	36.6	0	0	5	12	2	1707.87	461	474	TRUE
Paramyosin CG5939-PA, isoform A [Drosophila melanogaster]	gi|24661112,gi|24661116	102322	1	39	51	578	0.0027	0.494	SQVISQLEDAR	K	R	0.95	82.9	37	0	0	9	0	2	1245.64	235	245	TRUE
Paramyosin CG5939-PA, isoform A [Drosophila melanogaster]	gi|24661112,gi|24661116	102322	1	39	51	578	0.0027	0.494	SQVISQLEDARR	K	R	0.95	49.3	36.7	0	0	2	0	2	1401.75	235	246	TRUE
Paramyosin CG5939-PA, isoform A [Drosophila melanogaster]	gi|24661112,gi|24661116	102322	1	39	51	578	0.0027	0.494	TFVTTSTVPGSQVYIQETTR	R	T	0.95	133	36.2	0	0	15	0	2	2215.12	856	875	TRUE	gi|24661124,gi|24661120
Paramyosin CG5939-PA, isoform A [Drosophila melanogaster]	gi|24661112,gi|24661116	102322	1	39	51	578	0.0027	0.494	TNIDLQK	K	V	0.95	36.2	38.1	0	0	2	0	2	831.458	565	571	TRUE	gi|24661124,gi|24661120
Paramyosin CG5939-PA, isoform A [Drosophila melanogaster]	gi|24661112,gi|24661116	102322	1	39	51	578	0.0027	0.494	TVELQYEEAASR	R	I	0.95	109	36.6	0	0	42	0	2	1395.68	631	642	TRUE	gi|24661124,gi|24661120
Paramyosin CG5939-PA, isoform A [Drosophila melanogaster]	gi|24661112,gi|24661116	102322	1	39	51	578	0.0027	0.494	TVIDISSHR	R	S	0.95	43.6	36.3	0	0	3	0	2	1027.55	198	206	TRUE
Paramyosin CG5939-PA, isoform A [Drosophila melanogaster]	gi|24661112,gi|24661116	102322	1	39	51	578	0.0027	0.494	VKDNNNQLTR	K	E	0.95	38.2	37	0	0	0	2	2	1201.63	420	429	TRUE
Paramyosin CG5939-PA, isoform A [Drosophila melanogaster]	gi|24661112,gi|24661116	102322	1	39	51	578	0.0027	0.494	VQLDTVSFSK	K	S	0.95	56.3	35.9	0	1	25	0	2	1123.6	225	234	TRUE
CG1516 CG1516-PE, isoform E [Drosophila melanogaster]	gi|19921944,gi|24652210,gi|24652212,gi|24652214,gi|24652216,gi|24652218,gi|24652220,gi|24652222,gi|24652224	132658	1	36	39	469	0.00219	0.342	ADESYIVGK	K	G	0.95	55.1	35.7	0	0	3	0	2	981.489	82	90	TRUE
CG1516 CG1516-PE, isoform E [Drosophila melanogaster]	gi|19921944,gi|24652210,gi|24652212,gi|24652214,gi|24652216,gi|24652218,gi|24652220,gi|24652222,gi|24652224	132658	1	36	39	469	0.00219	0.342	AEELSFPK	R	S	0.95	60.2	37.1	0	0	30	0	2	920.473	954	961	TRUE
CG1516 CG1516-PE, isoform E [Drosophila melanogaster]	gi|19921944,gi|24652210,gi|24652212,gi|24652214,gi|24652216,gi|24652218,gi|24652220,gi|24652222,gi|24652224	132658	1	36	39	469	0.00219	0.342	AGGVVEAAISYTGDVSDPK	K	R	0.95	106	36.4	0	0	3	0	2	1835.9	715	733	TRUE
CG1516 CG1516-PE, isoform E [Drosophila melanogaster]	gi|19921944,gi|24652210,gi|24652212,gi|24652214,gi|24652216,gi|24652218,gi|24652220,gi|24652222,gi|24652224	132658	1	36	39	469	0.00219	0.342	AGNVVHLYER	K	D	0.95	41.6	37.3	0	0	0	3	2	1157.61	256	265	TRUE
CG1516 CG1516-PE, isoform E [Drosophila melanogaster]	gi|19921944,gi|24652210,gi|24652212,gi|24652214,gi|24652216,gi|24652218,gi|24652220,gi|24652222,gi|24652224	132658	1	36	39	469	0.00219	0.342	DAHQSLLATR	R	V	0.95	52.1	36.2	0	0	3	0	2	1111.59	591	600	TRUE
CG1516 CG1516-PE, isoform E [Drosophila melanogaster]	gi|19921944,gi|24652210,gi|24652212,gi|24652214,gi|24652216,gi|24652218,gi|24652220,gi|24652222,gi|24652224	132658	1	36	39	469	0.00219	0.342	DMAGLLKPESAR	K	L	0.95	65.8	36.9	0	0	5	0	2	1287.67	761	772	TRUE
CG1516 CG1516-PE, isoform E [Drosophila melanogaster]	gi|19921944,gi|24652210,gi|24652212,gi|24652214,gi|24652216,gi|24652218,gi|24652220,gi|24652222,gi|24652224	132658	1	36	39	469	0.00219	0.342	EANLLLGDIIK	R	V	0.95	86.5	36.3	0	0	30	0	2	1198.7	915	925	TRUE
CG1516 CG1516-PE, isoform E [Drosophila melanogaster]	gi|19921944,gi|24652210,gi|24652212,gi|24652214,gi|24652216,gi|24652218,gi|24652220,gi|24652222,gi|24652224	132658	1	36	39	469	0.00219	0.342	EANLLLGDIIKVTPSSK	R	V	0.95	55.4	36.3	0	0	0	13	2	1798.03	915	931	TRUE
CG1516 CG1516-PE, isoform E [Drosophila melanogaster]	gi|19921944,gi|24652210,gi|24652212,gi|24652214,gi|24652216,gi|24652218,gi|24652220,gi|24652222,gi|24652224	132658	1	36	39	469	0.00219	0.342	EEALEFCK	K	K	0.95	33.8	35.8	0	0	1	0	2	1025.46	180	187	TRUE
CG1516 CG1516-PE, isoform E [Drosophila melanogaster]	gi|19921944,gi|24652210,gi|24652212,gi|24652214,gi|24652216,gi|24652218,gi|24652220,gi|24652222,gi|24652224	132658	1	36	39	469	0.00219	0.342	ELLLMDTTFR	K	D	0.95	56.3	36.1	0	0	4	0	2	1238.65	581	590	TRUE
CG1516 CG1516-PE, isoform E [Drosophila melanogaster]	gi|19921944,gi|24652210,gi|24652212,gi|24652214,gi|24652216,gi|24652218,gi|24652220,gi|24652222,gi|24652224	132658	1	36	39	469	0.00219	0.342	ELQESHTCVTNR	K	D	0.95	54.5	36.6	0	0	1	0	2	1473.68	1012	1023	TRUE
CG1516 CG1516-PE, isoform E [Drosophila melanogaster]	gi|19921944,gi|24652210,gi|24652212,gi|24652214,gi|24652216,gi|24652218,gi|24652220,gi|24652222,gi|24652224	132658	1	36	39	469	0.00219	0.342	ENDVDAVHPGYGFLSER	K	S	0.95	61.4	36.4	0	0	4	1	2	1904.88	110	126	TRUE
CG1516 CG1516-PE, isoform E [Drosophila melanogaster]	gi|19921944,gi|24652210,gi|24652212,gi|24652214,gi|24652216,gi|24652218,gi|24652220,gi|24652222,gi|24652224	132658	1	36	39	469	0.00219	0.342	EVLVCEGPEAFAK	R	E	0.95	87.4	36.5	0	0	30	0	2	1448.71	562	574	TRUE
CG1516 CG1516-PE, isoform E [Drosophila melanogaster]	gi|19921944,gi|24652210,gi|24652212,gi|24652214,gi|24652216,gi|24652218,gi|24652220,gi|24652222,gi|24652224	132658	1	36	39	469	0.00219	0.342	FIGPSPEVVQK	R	M	0.95	57.8	36.8	0	0	24	0	2	1200.66	140	150	TRUE
CG1516 CG1516-PE, isoform E [Drosophila melanogaster]	gi|19921944,gi|24652210,gi|24652212,gi|24652214,gi|24652216,gi|24652218,gi|24652220,gi|24652222,gi|24652224	132658	1	36	39	469	0.00219	0.342	GANAVGYTSYPDNVVYK	R	F	0.95	122	36.4	0	0	35	0	2	1817.87	664	680	TRUE
CG1516 CG1516-PE, isoform E [Drosophila melanogaster]	gi|19921944,gi|24652210,gi|24652212,gi|24652214,gi|24652216,gi|24652218,gi|24652220,gi|24652222,gi|24652224	132658	1	36	39	469	0.00219	0.342	GMRVVRKMEDVEESFQR	R	A	0.95	50.2	36.3	0	0	0	4	2	2096.04	205	221	TRUE
CG1516 CG1516-PE, isoform E [Drosophila melanogaster]	gi|19921944,gi|24652210,gi|24652212,gi|24652214,gi|24652216,gi|24652218,gi|24652220,gi|24652222,gi|24652224	132658	1	36	39	469	0.00219	0.342	HGLPVIFK	K	A	0.95	50.6	35.7	0	0	6	0	2	910.552	189	196	TRUE
CG1516 CG1516-PE, isoform E [Drosophila melanogaster]	gi|19921944,gi|24652210,gi|24652212,gi|24652214,gi|24652216,gi|24652218,gi|24652220,gi|24652222,gi|24652224	132658	1	36	39	469	0.00219	0.342	HIEVQLLGDK	R	A	0.95	58.8	36.2	0	0	11	0	2	1151.64	246	255	TRUE
CG1516 CG1516-PE, isoform E [Drosophila melanogaster]	gi|19921944,gi|24652210,gi|24652212,gi|24652214,gi|24652216,gi|24652218,gi|24652220,gi|24652222,gi|24652224	132658	1	36	39	469	0.00219	0.342	IFLTGPK	R	V	0.95	36	37.9	0	0	2	0	2	775.472	1055	1061	TRUE
CG1516 CG1516-PE, isoform E [Drosophila melanogaster]	gi|19921944,gi|24652210,gi|24652212,gi|24652214,gi|24652216,gi|24652218,gi|24652220,gi|24652222,gi|24652224	132658	1	36	39	469	0.00219	0.342	KMEDVEESFQR	R	A	0.95	86.1	36.3	0	0	6	4	2	1397.64	211	221	TRUE
CG1516 CG1516-PE, isoform E [Drosophila melanogaster]	gi|19921944,gi|24652210,gi|24652212,gi|24652214,gi|24652216,gi|24652218,gi|24652220,gi|24652222,gi|24652224	132658	1	36	39	469	0.00219	0.342	LLITAIR	R	D	0.95	52.7	36	0	0	12	0	2	799.541	773	779	TRUE
CG1516 CG1516-PE, isoform E [Drosophila melanogaster]	gi|19921944,gi|24652210,gi|24652212,gi|24652214,gi|24652216,gi|24652218,gi|24652220,gi|24652222,gi|24652224	132658	1	36	39	469	0.00219	0.342	LPIEIR	R	D	0.95	44.4	34.1	0	0	31	0	2	740.467	285	290	TRUE
CG1516 CG1516-PE, isoform E [Drosophila melanogaster]	gi|19921944,gi|24652210,gi|24652212,gi|24652214,gi|24652216,gi|24652218,gi|24652220,gi|24652222,gi|24652224	132658	1	36	39	469	0.00219	0.342	MTEAAVR	K	L	0.95	46.7	37.3	0	0	2	0	2	777.393	293	299	TRUE
CG1516 CG1516-PE, isoform E [Drosophila melanogaster]	gi|19921944,gi|24652210,gi|24652212,gi|24652214,gi|24652216,gi|24652218,gi|24652220,gi|24652222,gi|24652224	132658	1	36	39	469	0.00219	0.342	SDFAQAVIDAGLR	R	F	0.95	90.9	36.6	0	0	14	0	2	1362.7	127	139	TRUE
CG1516 CG1516-PE, isoform E [Drosophila melanogaster]	gi|19921944,gi|24652210,gi|24652212,gi|24652214,gi|24652216,gi|24652218,gi|24652220,gi|24652222,gi|24652224	132658	1	36	39	469	0.00219	0.342	SEVGAPMPGTVIDIR	K	V	0.95	96.4	36.7	0	0	27	0	2	1557.79	1129	1143	TRUE
CG1516 CG1516-PE, isoform E [Drosophila melanogaster]	gi|19921944,gi|24652210,gi|24652212,gi|24652214,gi|24652216,gi|24652218,gi|24652220,gi|24652222,gi|24652224	132658	1	36	39	469	0.00219	0.342	SVAVYSEQDK	K	M	0.95	34.1	35.9	0	0	2	0	2	1125.54	65	74	TRUE
CG1516 CG1516-PE, isoform E [Drosophila melanogaster]	gi|19921944,gi|24652210,gi|24652212,gi|24652214,gi|24652216,gi|24652218,gi|24652220,gi|24652222,gi|24652224	132658	1	36	39	469	0.00219	0.342	TLYAPFECTTTMR	R	S	0.95	77.3	36.5	0	0	9	0	2	1590.73	862	874	TRUE
CG1516 CG1516-PE, isoform E [Drosophila melanogaster]	gi|19921944,gi|24652210,gi|24652212,gi|24652214,gi|24652216,gi|24652218,gi|24652220,gi|24652222,gi|24652224	132658	1	36	39	469	0.00219	0.342	TVSEYSAYWEQTR	R	T	0.95	94.9	36.6	0	0	5	0	2	1619.73	849	861	TRUE
CG1516 CG1516-PE, isoform E [Drosophila melanogaster]	gi|19921944,gi|24652210,gi|24652212,gi|24652214,gi|24652216,gi|24652218,gi|24652220,gi|24652222,gi|24652224	132658	1	36	39	469	0.00219	0.342	VAAIEAGVPIVPGTDGPVTTK	R	E	0.95	99.7	36.1	0	0	36	0	2	1992.1	159	179	TRUE
CG1516 CG1516-PE, isoform E [Drosophila melanogaster]	gi|19921944,gi|24652210,gi|24652212,gi|24652214,gi|24652216,gi|24652218,gi|24652220,gi|24652222,gi|24652224	132658	1	36	39	469	0.00219	0.342	VAEGMTLPELGYTQDK	R	I	0.95	93.5	36.3	0	0	20	0	2	1751.85	353	368	TRUE
CG1516 CG1516-PE, isoform E [Drosophila melanogaster]	gi|19921944,gi|24652210,gi|24652212,gi|24652214,gi|24652216,gi|24652218,gi|24652220,gi|24652222,gi|24652224	132658	1	36	39	469	0.00219	0.342	VGEEFDVPLER	K	G	0.95	72.5	37	0	0	24	0	2	1289.64	1062	1072	TRUE
CG1516 CG1516-PE, isoform E [Drosophila melanogaster]	gi|19921944,gi|24652210,gi|24652212,gi|24652214,gi|24652216,gi|24652218,gi|24652220,gi|24652222,gi|24652224	132658	1	36	39	469	0.00219	0.342	VISHASDLQSSASK	K	M	0.95	89.4	36.8	0	0	3	1	2	1429.73	431	444	TRUE
CG1516 CG1516-PE, isoform E [Drosophila melanogaster]	gi|19921944,gi|24652210,gi|24652212,gi|24652214,gi|24652216,gi|24652218,gi|24652220,gi|24652222,gi|24652224	132658	1	36	39	469	0.00219	0.342	VTTEDPANDFQPNTGR	R	L	0.95	116	36.5	0	0	51	0	2	1761.8	380	395	TRUE
CG1516 CG1516-PE, isoform E [Drosophila melanogaster]	gi|19921944,gi|24652210,gi|24652212,gi|24652214,gi|24652216,gi|24652218,gi|24652220,gi|24652222,gi|24652224	132658	1	36	39	469	0.00219	0.342	VVEIAPAPR	K	L	0.95	48.5	36.1	0	0	5	0	2	951.563	276	284	TRUE
CG1516 CG1516-PE, isoform E [Drosophila melanogaster]	gi|19921944,gi|24652210,gi|24652212,gi|24652214,gi|24652216,gi|24652218,gi|24652220,gi|24652222,gi|24652224	132658	1	36	39	469	0.00219	0.342	YYTNLADELVK	K	A	0.95	64.7	36.9	0	0	3	0	2	1328.67	741	751	TRUE
zormin CG33484-PD, isoform D [Drosophila melanogaster]	gi|116007762	411353	1	35	37	226	0.00106	0.131	APSEGSSQQPQAFR	R	D	0.95	70.3	36.5	0	0	11	0	2	1489.7	3364	3377	TRUE
zormin CG33484-PD, isoform D [Drosophila melanogaster]	gi|116007762	411353	1	35	37	226	0.00106	0.131	ASGQHQLQQSVDMGGNLQQAK	R	Q	0.95	59.1	36.2	2.85	0	0	4	2	2241.07	569	589	TRUE
zormin CG33484-PD, isoform D [Drosophila melanogaster]	gi|116007762	411353	1	35	37	226	0.00106	0.131	ATCVAFLNIR	K	G	0.95	42.4	36.4	0	0	2	0	2	1164.62	1994	2003	TRUE
zormin CG33484-PD, isoform D [Drosophila melanogaster]	gi|116007762	411353	1	35	37	226	0.00106	0.131	DGISIQTNSDYK	K	T	0.95	35.4	36.9	0	0	1	0	2	1340.63	1413	1424	TRUE
zormin CG33484-PD, isoform D [Drosophila melanogaster]	gi|116007762	411353	1	35	37	226	0.00106	0.131	DGNELLAQLEELEK	K	L	0.95	51.6	36.8	0	0	1	0	2	1600.81	279	292	TRUE
zormin CG33484-PD, isoform D [Drosophila melanogaster]	gi|116007762	411353	1	35	37	226	0.00106	0.131	DQQILEPFPYSPATSR	R	T	0.95	87.1	36.1	0	0	17	0	2	1848.91	3154	3169	TRUE
zormin CG33484-PD, isoform D [Drosophila melanogaster]	gi|116007762	411353	1	35	37	226	0.00106	0.131	FIAATQQQQQK	K	Q	0.95	64.4	36.7	0	0	2	0	2	1290.68	3079	3089	TRUE
zormin CG33484-PD, isoform D [Drosophila melanogaster]	gi|116007762	411353	1	35	37	226	0.00106	0.131	GSGLPASSDVQTVSQEHNTESSR	R	V	0.95	54.8	36	4.02	0	1	10	2	2373.09	2004	2026	TRUE
zormin CG33484-PD, isoform D [Drosophila melanogaster]	gi|116007762	411353	1	35	37	226	0.00106	0.131	IPLITEK	K	I	0.95	50.2	36.1	0	0	5	0	2	813.509	2565	2571	TRUE
zormin CG33484-PD, isoform D [Drosophila melanogaster]	gi|116007762	411353	1	35	37	226	0.00106	0.131	ITALGENLDESLR	K	M	0.95	88.6	36.7	0	0	1	0	2	1430.75	142	154	TRUE
zormin CG33484-PD, isoform D [Drosophila melanogaster]	gi|116007762	411353	1	35	37	226	0.00106	0.131	ITTQSDSELGVFK	R	L	0.95	84.4	36.4	0	0	15	0	2	1424.73	1844	1856	TRUE
zormin CG33484-PD, isoform D [Drosophila melanogaster]	gi|116007762	411353	1	35	37	226	0.00106	0.131	KQPQLTTMETSFK	R	S	0.95	58.3	36.6	0	0	1	0	2	1538.79	2818	2830	TRUE
zormin CG33484-PD, isoform D [Drosophila melanogaster]	gi|116007762	411353	1	35	37	226	0.00106	0.131	LEQNLIQGPSK	K	V	0.95	49.9	36.7	0	0	5	0	2	1226.67	2743	2753	TRUE
zormin CG33484-PD, isoform D [Drosophila melanogaster]	gi|116007762	411353	1	35	37	226	0.00106	0.131	LGVYESDYESDR	R	Y	0.95	71.1	36.7	0	0	7	0	2	1432.62	2791	2802	TRUE
zormin CG33484-PD, isoform D [Drosophila melanogaster]	gi|116007762	411353	1	35	37	226	0.00106	0.131	LILNNVSGDDK	K	G	0.95	47.1	37.2	0	0	1	0	2	1187.63	1857	1867	TRUE
zormin CG33484-PD, isoform D [Drosophila melanogaster]	gi|116007762	411353	1	35	37	226	0.00106	0.131	LPPGNELVIPVQHER	K	S	0.95	33	36.5	1.35	0	0	1	2	1697.93	3448	3462	TRUE
zormin CG33484-PD, isoform D [Drosophila melanogaster]	gi|116007762	411353	1	35	37	226	0.00106	0.131	LWTPTGVTGYTSDVEQK	R	S	0.95	52.6	36.2	0	0	1	0	2	1881.92	2651	2667	TRUE
zormin CG33484-PD, isoform D [Drosophila melanogaster]	gi|116007762	411353	1	35	37	226	0.00106	0.131	NGGQLFEDAHTR	K	I	0.95	40	37	0	0	1	1	2	1344.63	2165	2176	TRUE
zormin CG33484-PD, isoform D [Drosophila melanogaster]	gi|116007762	411353	1	35	37	226	0.00106	0.131	QPQAQSLAEELR	R	S	0.95	49.8	36.4	0	0	10	0	2	1369.71	2529	2540	TRUE
zormin CG33484-PD, isoform D [Drosophila melanogaster]	gi|116007762	411353	1	35	37	226	0.00106	0.131	QQAAIEQAQR	R	E	0.95	36.4	36.5	0	0	1	0	2	1142.59	1230	1239	TRUE
zormin CG33484-PD, isoform D [Drosophila melanogaster]	gi|116007762	411353	1	35	37	226	0.00106	0.131	SIADCAILEPSPER	K	L	0.95	35.5	36.7	0	0	1	0	2	1557.76	2310	2323	TRUE
zormin CG33484-PD, isoform D [Drosophila melanogaster]	gi|116007762	411353	1	35	37	226	0.00106	0.131	SLNQATDFFEVVEK	K	I	0.95	91.1	36.3	0	0	6	0	2	1626.8	1080	1093	TRUE
zormin CG33484-PD, isoform D [Drosophila melanogaster]	gi|116007762	411353	1	35	37	226	0.00106	0.131	SSAQAVQETLNDFSK	K	R	0.95	81.5	36.3	0	0	10	0	2	1624.78	727	741	TRUE
zormin CG33484-PD, isoform D [Drosophila melanogaster]	gi|116007762	411353	1	35	37	226	0.00106	0.131	SSQSSVEIIER	R	H	0.95	62.7	36.7	0	0	7	0	2	1234.63	1900	1910	TRUE
zormin CG33484-PD, isoform D [Drosophila melanogaster]	gi|116007762	411353	1	35	37	226	0.00106	0.131	STQVDTQLYPVFTSQSVDSK	K	Q	0.95	50.6	36.2	0	0	2	0	2	2230.09	781	800	TRUE
zormin CG33484-PD, isoform D [Drosophila melanogaster]	gi|116007762	411353	1	35	37	226	0.00106	0.131	STTSSSSFDYFK	K	K	0.95	72.9	37.2	0	0	9	0	2	1356.6	2493	2504	TRUE
zormin CG33484-PD, isoform D [Drosophila melanogaster]	gi|116007762	411353	1	35	37	226	0.00106	0.131	TIVYETGPVAPASEFK	K	T	0.95	106	36.6	0	0	22	0	2	1708.88	2330	2345	TRUE
zormin CG33484-PD, isoform D [Drosophila melanogaster]	gi|116007762	411353	1	35	37	226	0.00106	0.131	TPAAEFSDYSSEIDER	K	F	0.95	106	36.3	0	0	6	0	2	1816.79	2960	2975	TRUE
zormin CG33484-PD, isoform D [Drosophila melanogaster]	gi|116007762	411353	1	35	37	226	0.00106	0.131	VTPLNQAEPATR	K	A	0.95	52.5	36.1	0	0	13	0	2	1296.69	1773	1784	TRUE
zormin CG33484-PD, isoform D [Drosophila melanogaster]	gi|116007762	411353	1	35	37	226	0.00106	0.131	VVAINSAGEASSSCELK	K	V	0.95	142	36.2	0	0	31	0	2	1721.84	1756	1772	TRUE
zormin CG33484-PD, isoform D [Drosophila melanogaster]	gi|116007762	411353	1	35	37	226	0.00106	0.131	YGYSSLQQQAENQGR	R	R	0.95	89.6	36.3	0	0	10	0	2	1728.79	3314	3328	TRUE
zormin CG33484-PD, isoform D [Drosophila melanogaster]	gi|116007762	411353	1	35	37	226	0.00106	0.131	YSGSESDVEPGIR	K	K	0.95	69.9	36.5	0	0	6	0	2	1395.64	2805	2817	TRUE
Calcium ATPase at 60A CG3725-PA, isoform A [Drosophila melanogaster]	gi|17136664,gi|24762445,gi|24762447,gi|24762449,gi|24762451,gi|24762453,gi|24762455,gi|24762457	111686	1	34	42	581	0.00272	0.34	AEIGIAMGSGTAVAK	K	S	0.95	97.2	36.6	0	0	13	0	2	1391.72	714	728	TRUE
Calcium ATPase at 60A CG3725-PA, isoform A [Drosophila melanogaster]	gi|17136664,gi|24762445,gi|24762447,gi|24762449,gi|24762451,gi|24762453,gi|24762455,gi|24762457	111686	1	34	42	581	0.00272	0.34	ATAEAICR	K	R	0.95	48.6	37.3	0	0	2	0	2	891.436	630	637	TRUE
Calcium ATPase at 60A CG3725-PA, isoform A [Drosophila melanogaster]	gi|17136664,gi|24762445,gi|24762447,gi|24762449,gi|24762451,gi|24762453,gi|24762455,gi|24762457	111686	1	34	42	581	0.00272	0.34	CLALAVADSPMKPDEMDLGDSTK	R	F	0.95	55.2	36.1	4	0	1	9	2	2496.13	561	583	TRUE
Calcium ATPase at 60A CG3725-PA, isoform A [Drosophila melanogaster]	gi|17136664,gi|24762445,gi|24762447,gi|24762449,gi|24762451,gi|24762453,gi|24762455,gi|24762457	111686	1	34	42	581	0.00272	0.34	EFDDLSPTEQK	R	A	0.95	73.1	36.3	0	0	22	0	2	1308.6	657	667	TRUE
Calcium ATPase at 60A CG3725-PA, isoform A [Drosophila melanogaster]	gi|17136664,gi|24762445,gi|24762447,gi|24762449,gi|24762451,gi|24762453,gi|24762455,gi|24762457	111686	1	34	42	581	0.00272	0.34	EFTLEFSR	K	D	0.95	44.5	37.2	0	0	2	0	2	1028.51	482	489	TRUE
Calcium ATPase at 60A CG3725-PA, isoform A [Drosophila melanogaster]	gi|17136664,gi|24762445,gi|24762447,gi|24762449,gi|24762451,gi|24762453,gi|24762455,gi|24762457	111686	1	34	42	581	0.00272	0.34	EIVPGDLVEVSVGDK	K	I	0.95	72.5	36.5	0	1	10	0	2	1555.82	144	158	TRUE
Calcium ATPase at 60A CG3725-PA, isoform A [Drosophila melanogaster]	gi|17136664,gi|24762445,gi|24762447,gi|24762449,gi|24762451,gi|24762453,gi|24762455,gi|24762457	111686	1	34	42	581	0.00272	0.34	EIVPGDLVEVSVGDKIPADIR	K	I	0.95	37.4	36.3	0	0	1	0	2	2221.21	144	164	TRUE
Calcium ATPase at 60A CG3725-PA, isoform A [Drosophila melanogaster]	gi|17136664,gi|24762445,gi|24762447,gi|24762449,gi|24762451,gi|24762453,gi|24762455,gi|24762457	111686	1	34	42	581	0.00272	0.34	EVFDSIVR	K	C	0.95	51.4	36.3	0	1	24	0	2	964.51	606	613	TRUE
Calcium ATPase at 60A CG3725-PA, isoform A [Drosophila melanogaster]	gi|17136664,gi|24762445,gi|24762447,gi|24762449,gi|24762451,gi|24762453,gi|24762455,gi|24762457	111686	1	34	42	581	0.00272	0.34	FSIPVVLLDETLK	K	F	0.95	102	36.6	0	0	10	0	2	1473.86	973	985	TRUE
Calcium ATPase at 60A CG3725-PA, isoform A [Drosophila melanogaster]	gi|17136664,gi|24762445,gi|24762447,gi|24762449,gi|24762451,gi|24762453,gi|24762455,gi|24762457	111686	1	34	42	581	0.00272	0.34	GAPEGVLER	K	C	0.95	36.8	36	0	0	1	0	2	927.49	516	524	TRUE
Calcium ATPase at 60A CG3725-PA, isoform A [Drosophila melanogaster]	gi|17136664,gi|24762445,gi|24762447,gi|24762449,gi|24762451,gi|24762453,gi|24762455,gi|24762457	111686	1	34	42	581	0.00272	0.34	GLTLDQIK	R	A	0.95	51.2	37.5	0	0	19	0	2	887.52	23	30	TRUE
Calcium ATPase at 60A CG3725-PA, isoform A [Drosophila melanogaster]	gi|17136664,gi|24762445,gi|24762447,gi|24762449,gi|24762451,gi|24762453,gi|24762455,gi|24762457	111686	1	34	42	581	0.00272	0.34	IDQSILTGESVSVIK	R	H	0.95	109	36.6	0	0	35	0	2	1588.88	175	189	TRUE
Calcium ATPase at 60A CG3725-PA, isoform A [Drosophila melanogaster]	gi|17136664,gi|24762445,gi|24762447,gi|24762449,gi|24762451,gi|24762453,gi|24762455,gi|24762457	111686	1	34	42	581	0.00272	0.34	IGVFAEDEDTTGK	R	S	0.95	106	36.3	0	0	74	0	2	1381.65	639	651	TRUE
Calcium ATPase at 60A CG3725-PA, isoform A [Drosophila melanogaster]	gi|17136664,gi|24762445,gi|24762447,gi|24762449,gi|24762451,gi|24762453,gi|24762455,gi|24762457	111686	1	34	42	581	0.00272	0.34	ILALTGQYGTGR	K	D	0.95	107	36.7	0	0	34	0	2	1249.69	545	556	TRUE
Calcium ATPase at 60A CG3725-PA, isoform A [Drosophila melanogaster]	gi|17136664,gi|24762445,gi|24762447,gi|24762449,gi|24762451,gi|24762453,gi|24762455,gi|24762457	111686	1	34	42	581	0.00272	0.34	ITHIYSTTLR	R	I	0.95	38.3	37	0	0	2	2	2	1204.67	165	174	TRUE
Calcium ATPase at 60A CG3725-PA, isoform A [Drosophila melanogaster]	gi|17136664,gi|24762445,gi|24762447,gi|24762449,gi|24762451,gi|24762453,gi|24762455,gi|24762457	111686	1	34	42	581	0.00272	0.34	KAEIGIAMGSGTAVAK	K	S	0.95	132	36.7	0	0	10	0	2	1503.82	713	728	TRUE
Calcium ATPase at 60A CG3725-PA, isoform A [Drosophila melanogaster]	gi|17136664,gi|24762445,gi|24762447,gi|24762449,gi|24762451,gi|24762453,gi|24762455,gi|24762457	111686	1	34	42	581	0.00272	0.34	LDEFGEQLSK	K	V	0.95	85.8	36.4	0	0	48	0	2	1165.57	253	262	TRUE
Calcium ATPase at 60A CG3725-PA, isoform A [Drosophila melanogaster]	gi|17136664,gi|24762445,gi|24762447,gi|24762449,gi|24762451,gi|24762453,gi|24762455,gi|24762457	111686	1	34	42	581	0.00272	0.34	LNSFSVNK	K	S	0.95	48.1	36.4	0	0	5	0	2	908.484	452	459	TRUE
Calcium ATPase at 60A CG3725-PA, isoform A [Drosophila melanogaster]	gi|17136664,gi|24762445,gi|24762447,gi|24762449,gi|24762451,gi|24762453,gi|24762455,gi|24762457	111686	1	34	42	581	0.00272	0.34	MFIFDK	R	V	0.95	36.7	37	0	0	2	0	2	800.402	366	371	TRUE
Calcium ATPase at 60A CG3725-PA, isoform A [Drosophila melanogaster]	gi|17136664,gi|24762445,gi|24762447,gi|24762449,gi|24762451,gi|24762453,gi|24762455,gi|24762457	111686	1	34	42	581	0.00272	0.34	NAESAIEALK	R	E	0.95	81.2	37.3	0	1	15	0	2	1045.55	111	120	TRUE
Calcium ATPase at 60A CG3725-PA, isoform A [Drosophila melanogaster]	gi|17136664,gi|24762445,gi|24762447,gi|24762449,gi|24762451,gi|24762453,gi|24762455,gi|24762457	111686	1	34	42	581	0.00272	0.34	NAESAIEALKEYEPEMGK	R	V	0.95	52	36.2	0	0	1	0	2	2024.95	111	128	TRUE
Calcium ATPase at 60A CG3725-PA, isoform A [Drosophila melanogaster]	gi|17136664,gi|24762445,gi|24762447,gi|24762449,gi|24762451,gi|24762453,gi|24762455,gi|24762457	111686	1	34	42	581	0.00272	0.34	NILFSGTNVAAGK	K	A	0.95	87.9	36.7	0	3	23	0	2	1291.7	206	218	TRUE
Calcium ATPase at 60A CG3725-PA, isoform A [Drosophila melanogaster]	gi|17136664,gi|24762445,gi|24762447,gi|24762449,gi|24762451,gi|24762453,gi|24762455,gi|24762457	111686	1	34	42	581	0.00272	0.34	RIGVFAEDEDTTGK	R	S	0.95	36.8	36.3	2.44	0	0	1	2	1537.75	638	651	TRUE
Calcium ATPase at 60A CG3725-PA, isoform A [Drosophila melanogaster]	gi|17136664,gi|24762445,gi|24762447,gi|24762449,gi|24762451,gi|24762453,gi|24762455,gi|24762457	111686	1	34	42	581	0.00272	0.34	SLPSVETLGCTSVICSDK	R	T	0.95	122	36.4	0	0	34	0	2	1952.93	335	352	TRUE
Calcium ATPase at 60A CG3725-PA, isoform A [Drosophila melanogaster]	gi|17136664,gi|24762445,gi|24762447,gi|24762449,gi|24762451,gi|24762453,gi|24762455,gi|24762457	111686	1	34	42	581	0.00272	0.34	SMSSYCTPLK	K	A	0.95	38.3	37	0	0	1	0	2	1173.53	493	502	TRUE
Calcium ATPase at 60A CG3725-PA, isoform A [Drosophila melanogaster]	gi|17136664,gi|24762445,gi|24762447,gi|24762449,gi|24762451,gi|24762453,gi|24762455,gi|24762457	111686	1	34	42	581	0.00272	0.34	TEMSETEEIK	R	T	0.95	73	36.1	0	0	10	0	2	1196.54	237	246	TRUE
Calcium ATPase at 60A CG3725-PA, isoform A [Drosophila melanogaster]	gi|17136664,gi|24762445,gi|24762447,gi|24762449,gi|24762451,gi|24762453,gi|24762455,gi|24762457	111686	1	34	42	581	0.00272	0.34	TEMSETEEIKTPLQQK	R	L	0.95	83.3	36.4	0	0	9	12	2	1891.93	237	252	TRUE
Calcium ATPase at 60A CG3725-PA, isoform A [Drosophila melanogaster]	gi|17136664,gi|24762445,gi|24762447,gi|24762449,gi|24762451,gi|24762453,gi|24762455,gi|24762457	111686	1	34	42	581	0.00272	0.34	TGTLTTNQMSVSR	K	M	0.95	104	36.6	0	0	31	0	2	1411.69	353	365	TRUE
Calcium ATPase at 60A CG3725-PA, isoform A [Drosophila melanogaster]	gi|17136664,gi|24762445,gi|24762447,gi|24762449,gi|24762451,gi|24762453,gi|24762455,gi|24762457	111686	1	34	42	581	0.00272	0.34	TVEQSLNFFGTDPER	K	G	0.95	111	36.2	0	0	33	0	2	1739.82	8	22	TRUE
Calcium ATPase at 60A CG3725-PA, isoform A [Drosophila melanogaster]	gi|17136664,gi|24762445,gi|24762447,gi|24762449,gi|24762451,gi|24762453,gi|24762455,gi|24762457	111686	1	34	42	581	0.00272	0.34	TVEQSLNFFGTDPERGLTLDQIK	K	A	0.95	51.7	35.9	0	0	0	5	2	2608.33	8	30	TRUE
Calcium ATPase at 60A CG3725-PA, isoform A [Drosophila melanogaster]	gi|17136664,gi|24762445,gi|24762447,gi|24762449,gi|24762451,gi|24762453,gi|24762455,gi|24762457	111686	1	34	42	581	0.00272	0.34	VGEATETALIVLAEK	K	L	0.95	146	36.7	0	0	20	1	2	1543.86	437	451	TRUE
Calcium ATPase at 60A CG3725-PA, isoform A [Drosophila melanogaster]	gi|17136664,gi|24762445,gi|24762447,gi|24762449,gi|24762451,gi|24762453,gi|24762455,gi|24762457	111686	1	34	42	581	0.00272	0.34	VIVITGDNK	R	A	0.95	61.5	37.3	0	0	6	0	2	958.558	621	629	TRUE
Calcium ATPase at 60A CG3725-PA, isoform A [Drosophila melanogaster]	gi|17136664,gi|24762445,gi|24762447,gi|24762449,gi|24762451,gi|24762453,gi|24762455,gi|24762457	111686	1	34	42	581	0.00272	0.34	VPLTSALK	K	A	0.95	41.6	36.8	0	0	2	0	2	828.52	535	542	TRUE
Calcium ATPase at 60A CG3725-PA, isoform A [Drosophila melanogaster]	gi|17136664,gi|24762445,gi|24762447,gi|24762449,gi|24762451,gi|24762453,gi|24762455,gi|24762457	111686	1	34	42	581	0.00272	0.34	YGPNELPTEEGK	K	S	0.95	63.8	36.7	0	0	45	0	2	1333.63	36	47	TRUE
alpha actinin CG4376-PC, isoform C [Drosophila melanogaster]	gi|17137758	106358	1	31	34	241	0.00113	0.381	AAPFNNWLDGTR	R	E	0.95	83.4	36.6	0	0	10	0	2	1361.66	543	554	TRUE
alpha actinin CG4376-PC, isoform C [Drosophila melanogaster]	gi|17137758	106358	1	31	34	241	0.00113	0.381	AGTAIDNIEEDFR	K	N	0.95	87.7	36.4	0	0	16	0	2	1450.68	51	63	TRUE
alpha actinin CG4376-PC, isoform C [Drosophila melanogaster]	gi|17137758	106358	1	31	34	241	0.00113	0.381	ALDFIASK	K	G	0.95	61.1	36.9	0	1	10	0	2	864.483	99	106	TRUE
alpha actinin CG4376-PC, isoform C [Drosophila melanogaster]	gi|17137758	106358	1	31	34	241	0.00113	0.381	ANIVGPWIER	K	Q	0.95	47	36.2	0	0	3	0	2	1154.63	664	673	TRUE
alpha actinin CG4376-PC, isoform C [Drosophila melanogaster]	gi|17137758	106358	1	31	34	241	0.00113	0.381	DNPLENLNTAFDVAEK	K	Y	0.95	121	36.6	0	0	22	0	2	1789.86	202	217	TRUE
alpha actinin CG4376-PC, isoform C [Drosophila melanogaster]	gi|17137758	106358	1	31	34	241	0.00113	0.381	DQTLANELR	R	K	0.95	42	37.4	0	0	2	0	2	1059.54	640	648	TRUE
alpha actinin CG4376-PC, isoform C [Drosophila melanogaster]	gi|17137758	106358	1	31	34	241	0.00113	0.381	EGLLDPAWEK	R	Q	0.95	52	36.9	0	0	8	0	2	1157.58	25	34	TRUE
alpha actinin CG4376-PC, isoform C [Drosophila melanogaster]	gi|17137758	106358	1	31	34	241	0.00113	0.381	ELPPDQAEYCIQR	R	M	0.95	75.7	36.7	0	0	16	0	2	1618.75	876	888	TRUE
alpha actinin CG4376-PC, isoform C [Drosophila melanogaster]	gi|17137758	106358	1	31	34	241	0.00113	0.381	ESTDTDTAEQVIDSFR	R	I	0.95	124	36.7	0	0	31	0	2	1813.81	844	859	TRUE
alpha actinin CG4376-PC, isoform C [Drosophila melanogaster]	gi|17137758	106358	1	31	34	241	0.00113	0.381	FAIQDISVEEMTAK	R	E	0.95	74.2	36.6	0	0	4	0	2	1597.78	137	150	TRUE
alpha actinin CG4376-PC, isoform C [Drosophila melanogaster]	gi|17137758	106358	1	31	34	241	0.00113	0.381	GISQEQLNEFR	K	S	0.95	70.6	36.5	0	0	31	0	2	1320.65	767	777	TRUE
alpha actinin CG4376-PC, isoform C [Drosophila melanogaster]	gi|17137758	106358	1	31	34	241	0.00113	0.381	HEAFESDLAAHQDR	K	V	0.95	55	36.3	4.16	0	0	4	2	1625.73	462	475	TRUE
alpha actinin CG4376-PC, isoform C [Drosophila melanogaster]	gi|17137758	106358	1	31	34	241	0.00113	0.381	IHQAVQESMIFENR	K	Y	0.95	79.9	36.7	0	0	4	0	2	1701.84	716	729	TRUE
alpha actinin CG4376-PC, isoform C [Drosophila melanogaster]	gi|17137758	106358	1	31	34	241	0.00113	0.381	ILAADKPYILPDELR	R	R	0.95	89.1	36.5	0	0	6	6	2	1726.97	860	874	TRUE
alpha actinin CG4376-PC, isoform C [Drosophila melanogaster]	gi|17137758	106358	1	31	34	241	0.00113	0.381	KAGTAIDNIEEDFR	R	N	0.95	69.7	36.3	0	0	2	0	2	1578.78	50	63	TRUE
alpha actinin CG4376-PC, isoform C [Drosophila melanogaster]	gi|17137758	106358	1	31	34	241	0.00113	0.381	LETNFNTLQTK	K	L	0.95	92.3	36.5	0	0	24	0	2	1308.68	359	369	TRUE
alpha actinin CG4376-PC, isoform C [Drosophila melanogaster]	gi|17137758	106358	1	31	34	241	0.00113	0.381	LMEEYER	R	L	0.95	38.9	36.1	0	0	1	0	2	969.435	300	306	TRUE
alpha actinin CG4376-PC, isoform C [Drosophila melanogaster]	gi|17137758	106358	1	31	34	241	0.00113	0.381	LSNRPAYLPTEGK	R	T	0.95	50.5	36.7	0	0	1	2	2	1445.78	372	384	TRUE
alpha actinin CG4376-PC, isoform C [Drosophila melanogaster]	gi|17137758	106358	1	31	34	241	0.00113	0.381	MLDPDDLINTPKPDER	R	A	0.95	84.4	36.4	0	0	5	0	2	1868.91	224	239	TRUE
alpha actinin CG4376-PC, isoform C [Drosophila melanogaster]	gi|17137758	106358	1	31	34	241	0.00113	0.381	NINEVENQILTR	R	D	0.95	91.9	36.7	0	0	12	0	2	1442.76	752	763	TRUE
alpha actinin CG4376-PC, isoform C [Drosophila melanogaster]	gi|17137758	106358	1	31	34	241	0.00113	0.381	NVNVQNFHLSFK	K	D	0.95	51.4	36.7	0	0	2	0	2	1446.75	166	177	TRUE
alpha actinin CG4376-PC, isoform C [Drosophila melanogaster]	gi|17137758	106358	1	31	34	241	0.00113	0.381	QADNSLAGVQK	R	K	0.95	62.1	37.3	0	0	2	0	2	1130.58	326	336	TRUE
alpha actinin CG4376-PC, isoform C [Drosophila melanogaster]	gi|17137758	106358	1	31	34	241	0.00113	0.381	QGDLDFQR	R	I	0.95	51.8	36.2	0	0	2	0	2	978.465	812	819	TRUE
alpha actinin CG4376-PC, isoform C [Drosophila melanogaster]	gi|17137758	106358	1	31	34	241	0.00113	0.381	QYTYVPNNYNAETAANR	R	I	0.95	100	36.2	0	0	4	0	2	1988.91	270	286	TRUE
alpha actinin CG4376-PC, isoform C [Drosophila melanogaster]	gi|17137758	106358	1	31	34	241	0.00113	0.381	RTALDEAER	R	I	0.95	42.6	37.2	0	0	1	0	2	1060.54	519	527	TRUE
alpha actinin CG4376-PC, isoform C [Drosophila melanogaster]	gi|17137758	106358	1	31	34	241	0.00113	0.381	SSFNHFDK	R	N	0.95	47.3	35.7	0	0	1	0	2	981.443	778	785	TRUE
alpha actinin CG4376-PC, isoform C [Drosophila melanogaster]	gi|17137758	106358	1	31	34	241	0.00113	0.381	TFTAWCNSHLR	K	K	0.95	49.8	36.5	0	0	1	0	2	1392.65	39	49	TRUE
alpha actinin CG4376-PC, isoform C [Drosophila melanogaster]	gi|17137758	106358	1	31	34	241	0.00113	0.381	TVSDISNSWK	K	G	0.95	42.7	36.2	0	1	0	0	2	1136.56	385	394	TRUE
alpha actinin CG4376-PC, isoform C [Drosophila melanogaster]	gi|17137758	106358	1	31	34	241	0.00113	0.381	VGWEQLLTSINR	R	N	0.95	70.3	36.7	0	0	4	0	2	1415.76	740	751	TRUE
Laminin B2 CG3322-PA [Drosophila melanogaster]	gi|17737557	182321	1	30	31	130	0.000608	0.241	AEQQQLEDIELLER	R	A	0.95	76.9	36.5	0	0	14	0	2	1713.87	1358	1371	TRUE
Laminin B2 CG3322-PA [Drosophila melanogaster]	gi|17737557	182321	1	30	31	130	0.000608	0.241	ALQTVPNIEK	K	E	0.95	48.7	36.4	0	0	6	0	2	1112.63	1417	1426	TRUE
Laminin B2 CG3322-PA [Drosophila melanogaster]	gi|17737557	182321	1	30	31	130	0.000608	0.241	AVEQGDNTLK	K	E	0.95	65.6	37.3	0	0	4	0	2	1074.54	1382	1391	TRUE
Laminin B2 CG3322-PA [Drosophila melanogaster]	gi|17737557	182321	1	30	31	130	0.000608	0.241	CQCKPGVTGDK	K	C	0.95	34	36.7	0	0	0	1	2	1249.57	432	442	TRUE
Laminin B2 CG3322-PA [Drosophila melanogaster]	gi|17737557	182321	1	30	31	130	0.000608	0.241	CSCYEAGTEQDEQSITR	R	C	0.95	127	36.3	0	0	2	0	2	2033.82	902	918	TRUE
Laminin B2 CG3322-PA [Drosophila melanogaster]	gi|17737557	182321	1	30	31	130	0.000608	0.241	DCGECQPGYFNIR	R	S	0.95	65.9	36.7	0	0	6	0	2	1615.66	936	948	TRUE
Laminin B2 CG3322-PA [Drosophila melanogaster]	gi|17737557	182321	1	30	31	130	0.000608	0.241	DDGYCVNCACDPVGSR	R	S	0.95	100	36.4	0	0	6	0	2	1844.7	407	422	TRUE
Laminin B2 CG3322-PA [Drosophila melanogaster]	gi|17737557	182321	1	30	31	130	0.000608	0.241	DNSGDGGQTYAEVIDDLHK	R	H	0.95	41.3	36.3	0	0	0	1	2	2033.91	1109	1127	TRUE
Laminin B2 CG3322-PA [Drosophila melanogaster]	gi|17737557	182321	1	30	31	130	0.000608	0.241	EIQNAESLISQAEEALDGANK	K	N	0.95	117	36.2	0	0	1	0	2	2230.08	1427	1447	TRUE
Laminin B2 CG3322-PA [Drosophila melanogaster]	gi|17737557	182321	1	30	31	130	0.000608	0.241	ELKDEVQNIGLISK	R	A	0.95	57.5	36.6	0	0	2	0	2	1585.88	1612	1625	TRUE
Laminin B2 CG3322-PA [Drosophila melanogaster]	gi|17737557	182321	1	30	31	130	0.000608	0.241	ELQQALDLLNDEGAQALAR	K	A	0.95	133	36.2	0	0	3	0	2	2068.07	1170	1188	TRUE
Laminin B2 CG3322-PA [Drosophila melanogaster]	gi|17737557	182321	1	30	31	130	0.000608	0.241	FQADANGEIDR	K	A	0.95	50.8	36.4	0	0	4	0	2	1235.57	1142	1152	TRUE
Laminin B2 CG3322-PA [Drosophila melanogaster]	gi|17737557	182321	1	30	31	130	0.000608	0.241	GFYGNALGGTPNDCK	K	R	0.95	82.7	36.8	0	0	9	0	2	1570.7	777	791	TRUE
Laminin B2 CG3322-PA [Drosophila melanogaster]	gi|17737557	182321	1	30	31	130	0.000608	0.241	ISLPIFAQGNGIPDQGVK	R	E	0.95	68	36.3	0	0	5	0	2	1854.01	623	640	TRUE
Laminin B2 CG3322-PA [Drosophila melanogaster]	gi|17737557	182321	1	30	31	130	0.000608	0.241	KGEGEAHALCTSEYSDISPLR	R	D	0.95	62.8	36.1	3.66	0	0	2	2	2320.09	209	229	TRUE
Laminin B2 CG3322-PA [Drosophila melanogaster]	gi|17737557	182321	1	30	31	130	0.000608	0.241	LAGFQSDVQR	K	S	0.95	52.3	36.8	0	0	2	0	2	1120.58	1400	1409	TRUE
Laminin B2 CG3322-PA [Drosophila melanogaster]	gi|17737557	182321	1	30	31	130	0.000608	0.241	LNTFGDELFGDSQVLK	R	S	0.95	87.8	36.4	0	0	7	0	2	1782.89	269	284	TRUE
Laminin B2 CG3322-PA [Drosophila melanogaster]	gi|17737557	182321	1	30	31	130	0.000608	0.241	LTEMDIFK	K	L	0.95	52.9	35.6	0	0	4	0	2	996.508	1501	1508	TRUE
Laminin B2 CG3322-PA [Drosophila melanogaster]	gi|17737557	182321	1	30	31	130	0.000608	0.241	QSLGTVVQTSK	K	E	0.95	69.2	36.9	0	0	4	0	2	1147.63	1269	1279	TRUE
Laminin B2 CG3322-PA [Drosophila melanogaster]	gi|17737557	182321	1	30	31	130	0.000608	0.241	QTQPEIDISQLK	R	K	0.95	62	36.5	0	0	11	0	2	1399.74	1302	1313	TRUE
Laminin B2 CG3322-PA [Drosophila melanogaster]	gi|17737557	182321	1	30	31	130	0.000608	0.241	SEVGLELSHVK	R	Q	0.95	94.5	36.3	0	0	7	0	2	1197.65	1258	1268	TRUE
Laminin B2 CG3322-PA [Drosophila melanogaster]	gi|17737557	182321	1	30	31	130	0.000608	0.241	SGELQEWVTATDIR	R	I	0.95	83	36.3	0	0	1	0	2	1604.79	250	263	TRUE
Laminin B2 CG3322-PA [Drosophila melanogaster]	gi|17737557	182321	1	30	31	130	0.000608	0.241	SPRPESFTIYK	R	R	0.95	45.7	36.3	0	0	1	3	2	1324.69	167	177	TRUE
Laminin B2 CG3322-PA [Drosophila melanogaster]	gi|17737557	182321	1	30	31	130	0.000608	0.241	STSTEVNECK	R	A	0.95	63.4	36.2	0	0	2	0	2	1154.5	348	357	TRUE
Laminin B2 CG3322-PA [Drosophila melanogaster]	gi|17737557	182321	1	30	31	130	0.000608	0.241	SVEFGQQSEQISDISR	K	E	0.95	98	36.4	0	0	11	0	2	1809.86	1193	1208	TRUE
Laminin B2 CG3322-PA [Drosophila melanogaster]	gi|17737557	182321	1	30	31	130	0.000608	0.241	SYDITYVR	K	I	0.95	50.7	37.5	0	0	1	0	2	1016.51	155	162	TRUE
Laminin B2 CG3322-PA [Drosophila melanogaster]	gi|17737557	182321	1	30	31	130	0.000608	0.241	TPVTNDDEFEAK	R	L	0.95	70.4	36.2	0	0	3	0	2	1365.62	1081	1092	TRUE
Laminin B2 CG3322-PA [Drosophila melanogaster]	gi|17737557	182321	1	30	31	130	0.000608	0.241	VAVLAQDAR	K	D	0.95	52.3	36.8	0	0	1	0	2	942.537	1100	1108	TRUE
Laminin B2 CG3322-PA [Drosophila melanogaster]	gi|17737557	182321	1	30	31	130	0.000608	0.241	WTAADLNQR	R	E	0.95	57.9	37.3	0	0	5	0	2	1074.53	545	553	TRUE
rhea CG6831-PA [Drosophila melanogaster]	gi|21355751	306972	1	28	28	106	0.000496	0.146	ALQPTVTDIPSATQLSK	R	G	0.95	63.6	36.4	0	0	13	0	2	1769.97	1024	1040	TRUE
rhea CG6831-PA [Drosophila melanogaster]	gi|21355751	306972	1	28	28	106	0.000496	0.146	APIQELGSDLR	K	S	0.95	71.3	36.3	0	0	15	0	2	1198.64	536	546	TRUE
rhea CG6831-PA [Drosophila melanogaster]	gi|21355751	306972	1	28	28	106	0.000496	0.146	AVANTTAALVLR	K	A	0.95	34.9	36.8	0	0	1	0	2	1199.71	692	703	TRUE
rhea CG6831-PA [Drosophila melanogaster]	gi|21355751	306972	1	28	28	106	0.000496	0.146	AVNSLCEVCNEASNDPK	R	L	0.95	69.4	36.5	0	0	3	0	2	1906.83	764	780	TRUE
rhea CG6831-PA [Drosophila melanogaster]	gi|21355751	306972	1	28	28	106	0.000496	0.146	DACGGQELESALEEVR	R	K	0.95	54.3	36.5	0	0	1	0	2	1762.79	1061	1076	TRUE
rhea CG6831-PA [Drosophila melanogaster]	gi|21355751	306972	1	28	28	106	0.000496	0.146	DAILDGTHPVTQDK	R	A	0.95	42.6	36.4	0	0	1	0	2	1509.76	229	242	TRUE
rhea CG6831-PA [Drosophila melanogaster]	gi|21355751	306972	1	28	28	106	0.000496	0.146	DTALALGDFTR	R	S	0.95	36.9	36.3	0	0	2	0	2	1179.6	1141	1151	TRUE
rhea CG6831-PA [Drosophila melanogaster]	gi|21355751	306972	1	28	28	106	0.000496	0.146	ELDSCALAVNAQGLSQR	R	R	0.95	59.1	36.6	0	0	1	0	2	1831.9	1681	1697	TRUE
rhea CG6831-PA [Drosophila melanogaster]	gi|21355751	306972	1	28	28	106	0.000496	0.146	EQGIDEAETVLLR	R	R	0.95	66.2	36.5	0	0	2	0	2	1472.76	190	202	TRUE
rhea CG6831-PA [Drosophila melanogaster]	gi|21355751	306972	1	28	28	106	0.000496	0.146	EVTGALSATVDCIPGQR	R	E	0.95	62.2	36.6	0	0	1	0	2	1773.88	1202	1218	TRUE
rhea CG6831-PA [Drosophila melanogaster]	gi|21355751	306972	1	28	28	106	0.000496	0.146	FFFSDQNIDSR	R	D	0.95	35.3	36.6	0	0	1	0	2	1375.63	205	215	TRUE
rhea CG6831-PA [Drosophila melanogaster]	gi|21355751	306972	1	28	28	106	0.000496	0.146	GACSLGSTQPDSQVMVINAVK	R	D	0.95	63	36.1	0	0	2	0	2	2162.06	2074	2094	TRUE
rhea CG6831-PA [Drosophila melanogaster]	gi|21355751	306972	1	28	28	106	0.000496	0.146	GVGTEEMLISTAK	R	Q	0.95	41.6	36.6	0	0	4	0	2	1335.68	2424	2436	TRUE
rhea CG6831-PA [Drosophila melanogaster]	gi|21355751	306972	1	28	28	106	0.000496	0.146	ISSVNLTEPQR	R	A	0.95	56.6	37	0	0	2	0	2	1243.66	502	512	TRUE
rhea CG6831-PA [Drosophila melanogaster]	gi|21355751	306972	1	28	28	106	0.000496	0.146	LCSSNPHDSDNQNALR	R	K	0.95	34.9	36.4	0	0	0	1	2	1827.8	894	909	TRUE
rhea CG6831-PA [Drosophila melanogaster]	gi|21355751	306972	1	28	28	106	0.000496	0.146	LVDPLLEAVK	R	A	0.95	42.5	36.1	0	0	1	0	2	1096.66	1568	1577	TRUE
rhea CG6831-PA [Drosophila melanogaster]	gi|21355751	306972	1	28	28	106	0.000496	0.146	NAQGFTTDESDTEYAYR	K	S	0.95	91.1	36.3	0	0	1	0	2	1967.83	2539	2555	TRUE
rhea CG6831-PA [Drosophila melanogaster]	gi|21355751	306972	1	28	28	106	0.000496	0.146	NLCSAFSDLLK	R	A	0.95	39.5	36.3	0	0	1	0	2	1267.64	630	640	TRUE
rhea CG6831-PA [Drosophila melanogaster]	gi|21355751	306972	1	28	28	106	0.000496	0.146	NNAEQLGHAVGEISR	K	Y	0.95	57.3	36.5	0	0	2	0	2	1594.79	1729	1743	TRUE
rhea CG6831-PA [Drosophila melanogaster]	gi|21355751	306972	1	28	28	106	0.000496	0.146	QVAASTAQLLIACK	K	V	0.95	34.7	36.6	0	0	2	0	2	1473.81	2437	2450	TRUE
rhea CG6831-PA [Drosophila melanogaster]	gi|21355751	306972	1	28	28	106	0.000496	0.146	SINDPSMQDLK	K	E	0.95	46	36.7	0	0	2	0	2	1247.59	2114	2124	TRUE
rhea CG6831-PA [Drosophila melanogaster]	gi|21355751	306972	1	28	28	106	0.000496	0.146	SVAWNCAETEELR	R	S	0.95	59.2	36.4	0	0	3	0	2	1564.71	2231	2243	TRUE
rhea CG6831-PA [Drosophila melanogaster]	gi|21355751	306972	1	28	28	106	0.000496	0.146	SVHGVAATTQNPAIIDCADDVVTSSAR	R	L	0.95	99.8	36	4.62	0	0	6	2	2755.33	1152	1178	TRUE
rhea CG6831-PA [Drosophila melanogaster]	gi|21355751	306972	1	28	28	106	0.000496	0.146	SVSSMIQSSAGGARPNDAGAQK	R	E	0.95	64.2	36.2	0	0	0	4	2	2135.02	1936	1957	TRUE
rhea CG6831-PA [Drosophila melanogaster]	gi|21355751	306972	1	28	28	106	0.000496	0.146	TIQFQPNTTVFDACK	K	V	0.95	43.2	36.4	0	0	1	0	2	1769.85	18	32	TRUE
rhea CG6831-PA [Drosophila melanogaster]	gi|21355751	306972	1	28	28	106	0.000496	0.146	TLEAGTAVGESYR	R	D	0.95	71.6	36.5	0	0	9	0	2	1353.67	2246	2258	TRUE
rhea CG6831-PA [Drosophila melanogaster]	gi|21355751	306972	1	28	28	106	0.000496	0.146	TLGQTTAQLIQSIK	R	G	0.95	37.8	36.7	0	0	1	0	2	1501.86	846	859	TRUE
rhea CG6831-PA [Drosophila melanogaster]	gi|21355751	306972	1	28	28	106	0.000496	0.146	TLQGASNPEALTQAGR	R	E	0.95	104	36.5	0	0	23	0	2	1613.82	1186	1201	TRUE
CG4389 CG4389-PB, isoform B [Drosophila melanogaster]	gi|24583077,gi|24583079	79622	1	27	31	210	0.000983	0.423	DQTLASLRPTLDYSDFK	R	N	0.95	78.7	36.4	0	0	3	3	2	1969.99	396	412	TRUE
CG4389 CG4389-PB, isoform B [Drosophila melanogaster]	gi|24583077,gi|24583079	79622	1	27	31	210	0.000983	0.423	DTIAQAVAVGLK	K	Q	0.95	89.3	36.9	0	1	16	0	2	1185.68	493	504	TRUE
CG4389 CG4389-PB, isoform B [Drosophila melanogaster]	gi|24583077,gi|24583079	79622	1	27	31	210	0.000983	0.423	ELEAVVPEHCVIATNTSAIPITK	K	I	0.95	96.4	35.9	0	0	8	3	2	2492.31	434	456	TRUE
CG4389 CG4389-PB, isoform B [Drosophila melanogaster]	gi|24583077,gi|24583079	79622	1	27	31	210	0.000983	0.423	FINEAVLCLEEK	R	I	0.95	101	36.5	0	0	6	0	2	1464.74	655	666	TRUE
CG4389 CG4389-PB, isoform B [Drosophila melanogaster]	gi|24583077,gi|24583079	79622	1	27	31	210	0.000983	0.423	GANAPEDLTLR	K	M	0.95	66.8	36.7	0	0	20	0	2	1156.6	640	650	TRUE
CG4389 CG4389-PB, isoform B [Drosophila melanogaster]	gi|24583077,gi|24583079	79622	1	27	31	210	0.000983	0.423	GFGELSATPESK	K	G	0.95	58.5	36.3	0	0	5	0	2	1222.6	299	310	TRUE
CG4389 CG4389-PB, isoform B [Drosophila melanogaster]	gi|24583077,gi|24583079	79622	1	27	31	210	0.000983	0.423	GIFLYDGQK	K	R	0.95	57.2	36.3	0	0	4	0	2	1040.54	608	616	TRUE
CG4389 CG4389-PB, isoform B [Drosophila melanogaster]	gi|24583077,gi|24583079	79622	1	27	31	210	0.000983	0.423	GIGQVQK	R	G	0.95	37.2	37.3	0	0	2	0	2	729.426	373	379	TRUE
CG4389 CG4389-PB, isoform B [Drosophila melanogaster]	gi|24583077,gi|24583079	79622	1	27	31	210	0.000983	0.423	GLIALFR	K	G	0.95	40.6	37.9	0	0	1	0	2	789.499	311	317	TRUE
CG4389 CG4389-PB, isoform B [Drosophila melanogaster]	gi|24583077,gi|24583079	79622	1	27	31	210	0.000983	0.423	GTDAGYEAER	K	K	0.95	83.4	36.1	0	0	2	0	2	1068.46	288	297	TRUE
CG4389 CG4389-PB, isoform B [Drosophila melanogaster]	gi|24583077,gi|24583079	79622	1	27	31	210	0.000983	0.423	GTRPVNNDALEIVK	R	Q	0.95	76.5	36.4	0	0	12	8	2	1525.83	618	631	TRUE
CG4389 CG4389-PB, isoform B [Drosophila melanogaster]	gi|24583077,gi|24583079	79622	1	27	31	210	0.000983	0.423	IAAGSSRPEK	K	V	0.95	57.7	37.3	0	0	2	0	2	1015.55	457	466	TRUE
CG4389 CG4389-PB, isoform B [Drosophila melanogaster]	gi|24583077,gi|24583079	79622	1	27	31	210	0.000983	0.423	ILDVIR	K	A	0.95	33.8	36.2	0	0	1	0	2	728.467	277	282	TRUE
CG4389 CG4389-PB, isoform B [Drosophila melanogaster]	gi|24583077,gi|24583079	79622	1	27	31	210	0.000983	0.423	ILSTMLSEAIR	R	L	0.95	48.1	36.8	0	0	3	0	2	1233.69	523	533	TRUE
CG4389 CG4389-PB, isoform B [Drosophila melanogaster]	gi|24583077,gi|24583079	79622	1	27	31	210	0.000983	0.423	IQSFVMDTDFVK	K	N	0.95	107	36.8	0	0	7	0	2	1429.7	241	252	TRUE
CG4389 CG4389-PB, isoform B [Drosophila melanogaster]	gi|24583077,gi|24583079	79622	1	27	31	210	0.000983	0.423	LLQEGVDPK	R	D	0.95	53.6	36.1	0	0	8	0	2	998.553	534	542	TRUE
CG4389 CG4389-PB, isoform B [Drosophila melanogaster]	gi|24583077,gi|24583079	79622	1	27	31	210	0.000983	0.423	LTSVPTALDMELTGK	K	Q	0.95	55.8	36.5	0	0	4	0	2	1575.83	163	177	TRUE
CG4389 CG4389-PB, isoform B [Drosophila melanogaster]	gi|24583077,gi|24583079	79622	1	27	31	210	0.000983	0.423	MQLLEIITHPGTSK	K	D	0.95	84.4	36.5	0	0	4	0	2	1567.85	479	492	TRUE
CG4389 CG4389-PB, isoform B [Drosophila melanogaster]	gi|24583077,gi|24583079	79622	1	27	31	210	0.000983	0.423	STNPAPVANK	M	H	0.95	48.9	36.1	0	0	2	0	2	998.527	2	11	TRUE
CG4389 CG4389-PB, isoform B [Drosophila melanogaster]	gi|24583077,gi|24583079	79622	1	27	31	210	0.000983	0.423	TAVQVANDLASGK	K	L	0.95	82.8	37	0	0	34	0	2	1273.68	215	227	TRUE
CG4389 CG4389-PB, isoform B [Drosophila melanogaster]	gi|24583077,gi|24583079	79622	1	27	31	210	0.000983	0.423	TAVQVANDLASGKLRVNR	K	E	0.95	45.7	36.4	1.64	0	0	4	2	1912.07	215	232	TRUE
CG4389 CG4389-PB, isoform B [Drosophila melanogaster]	gi|24583077,gi|24583079	79622	1	27	31	210	0.000983	0.423	VNSLGSEVSDEFER	K	V	0.95	105	36.3	0	0	34	0	2	1567.72	33	46	TRUE
CG4389 CG4389-PB, isoform B [Drosophila melanogaster]	gi|24583077,gi|24583079	79622	1	27	31	210	0.000983	0.423	VVGMHYFSPVDK	K	M	0.95	61	36.8	0	0	1	0	2	1378.68	467	478	TRUE
CG4389 CG4389-PB, isoform B [Drosophila melanogaster]	gi|24583077,gi|24583079	79622	1	27	31	210	0.000983	0.423	VVITVGDGPGFYTTR	K	I	0.95	90.5	36.5	0	0	8	0	2	1581.83	508	522	TRUE
Clathrin heavy chain CG9012-PE, isoform E [Drosophila melanogaster]	gi|161077848,gi|161077850,gi|17137000,gi|24642310,gi|45555323,gi|45555333	191165	1	27	27	138	0.000646	0.196	ADDPSAYVDVVDVASK	K	V	0.95	109	36.2	0	0	22	0	2	1650.79	1132	1147	TRUE
Clathrin heavy chain CG9012-PE, isoform E [Drosophila melanogaster]	gi|161077848,gi|161077850,gi|17137000,gi|24642310,gi|45555323,gi|45555333	191165	1	27	27	138	0.000646	0.196	ALEHYTDLYDIK	R	R	0.95	59.4	36.4	0	0	3	0	2	1480.73	627	638	TRUE
Clathrin heavy chain CG9012-PE, isoform E [Drosophila melanogaster]	gi|161077848,gi|161077850,gi|17137000,gi|24642310,gi|45555323,gi|45555333	191165	1	27	27	138	0.000646	0.196	AQLQQGLVK	K	E	0.95	61	36.6	0	0	4	0	2	984.584	1115	1123	TRUE
Clathrin heavy chain CG9012-PE, isoform E [Drosophila melanogaster]	gi|161077848,gi|161077850,gi|17137000,gi|24642310,gi|45555323,gi|45555333	191165	1	27	27	138	0.000646	0.196	CNEPAVWSQLAK	R	A	0.95	70.9	36.7	0	0	6	0	2	1402.68	1103	1114	TRUE
Clathrin heavy chain CG9012-PE, isoform E [Drosophila melanogaster]	gi|161077848,gi|161077850,gi|17137000,gi|24642310,gi|45555323,gi|45555333	191165	1	27	27	138	0.000646	0.196	EAIDSYIK	K	A	0.95	33.7	35.6	0	0	1	0	2	938.484	1124	1131	TRUE
Clathrin heavy chain CG9012-PE, isoform E [Drosophila melanogaster]	gi|161077848,gi|161077850,gi|17137000,gi|24642310,gi|45555323,gi|45555333	191165	1	27	27	138	0.000646	0.196	EFQGAVDSAR	K	K	0.95	42.8	36.4	0	0	2	0	2	1079.51	1237	1246	TRUE
Clathrin heavy chain CG9012-PE, isoform E [Drosophila melanogaster]	gi|161077848,gi|161077850,gi|17137000,gi|24642310,gi|45555323,gi|45555333	191165	1	27	27	138	0.000646	0.196	ELIAVCNENSLFK	R	S	0.95	70.9	36.3	0	0	3	0	2	1536.77	930	942	TRUE
Clathrin heavy chain CG9012-PE, isoform E [Drosophila melanogaster]	gi|161077848,gi|161077850,gi|17137000,gi|24642310,gi|45555323,gi|45555333	191165	1	27	27	138	0.000646	0.196	GQFSTDELVEEVEK	K	R	0.95	87.2	36.5	0	0	8	0	2	1609.76	839	852	TRUE
Clathrin heavy chain CG9012-PE, isoform E [Drosophila melanogaster]	gi|161077848,gi|161077850,gi|17137000,gi|24642310,gi|45555323,gi|45555333	191165	1	27	27	138	0.000646	0.196	GQFSTDELVEEVEKR	K	N	0.95	48.7	36.5	0	0	1	0	2	1765.86	839	853	TRUE
Clathrin heavy chain CG9012-PE, isoform E [Drosophila melanogaster]	gi|161077848,gi|161077850,gi|17137000,gi|24642310,gi|45555323,gi|45555333	191165	1	27	27	138	0.000646	0.196	IILDSSVFSDHR	K	N	0.95	81.7	36.8	0	0	2	0	2	1388.72	1012	1023	TRUE
Clathrin heavy chain CG9012-PE, isoform E [Drosophila melanogaster]	gi|161077848,gi|161077850,gi|17137000,gi|24642310,gi|45555323,gi|45555333	191165	1	27	27	138	0.000646	0.196	IYIDSNNNPER	K	Y	0.95	54.5	36.6	0	0	2	0	2	1334.63	883	893	TRUE
Clathrin heavy chain CG9012-PE, isoform E [Drosophila melanogaster]	gi|161077848,gi|161077850,gi|17137000,gi|24642310,gi|45555323,gi|45555333	191165	1	27	27	138	0.000646	0.196	LADLEEFISGPNHADIQK	R	I	0.95	60.5	36.2	2.51	0	0	1	2	1997	1184	1201	TRUE
Clathrin heavy chain CG9012-PE, isoform E [Drosophila melanogaster]	gi|161077848,gi|161077850,gi|17137000,gi|24642310,gi|45555323,gi|45555333	191165	1	27	27	138	0.000646	0.196	LECSEELGDLVK	K	A	0.95	81.6	36.6	0	0	16	0	2	1391.67	458	469	TRUE
Clathrin heavy chain CG9012-PE, isoform E [Drosophila melanogaster]	gi|161077848,gi|161077850,gi|17137000,gi|24642310,gi|45555323,gi|45555333	191165	1	27	27	138	0.000646	0.196	LFTAGQYAEAAK	K	V	0.95	46.6	36.6	0	0	3	0	2	1269.65	371	382	TRUE
Clathrin heavy chain CG9012-PE, isoform E [Drosophila melanogaster]	gi|161077848,gi|161077850,gi|17137000,gi|24642310,gi|45555323,gi|45555333	191165	1	27	27	138	0.000646	0.196	LLYNNVSNFAR	K	L	0.95	87.7	36.3	0	0	11	0	2	1310.69	1217	1227	TRUE
Clathrin heavy chain CG9012-PE, isoform E [Drosophila melanogaster]	gi|161077848,gi|161077850,gi|17137000,gi|24642310,gi|45555323,gi|45555333	191165	1	27	27	138	0.000646	0.196	LPVVVGGLLDVDCSEDIIK	R	N	0.95	99.7	36.2	0	0	3	0	2	2041.09	813	831	TRUE
Clathrin heavy chain CG9012-PE, isoform E [Drosophila melanogaster]	gi|161077848,gi|161077850,gi|17137000,gi|24642310,gi|45555323,gi|45555333	191165	1	27	27	138	0.000646	0.196	LTDQLPLIIVCDR	K	F	0.95	77	36.5	0	0	6	0	2	1555.85	769	781	TRUE
Clathrin heavy chain CG9012-PE, isoform E [Drosophila melanogaster]	gi|161077848,gi|161077850,gi|17137000,gi|24642310,gi|45555323,gi|45555333	191165	1	27	27	138	0.000646	0.196	NNLAGAEDLFVR	R	K	0.95	73.9	36.6	0	0	6	0	2	1318.68	355	366	TRUE
Clathrin heavy chain CG9012-PE, isoform E [Drosophila melanogaster]	gi|161077848,gi|161077850,gi|17137000,gi|24642310,gi|45555323,gi|45555333	191165	1	27	27	138	0.000646	0.196	NSIDGFDNFDNIALAQK	R	L	0.95	127	36.2	0	0	13	0	2	1881.9	1483	1499	TRUE
Clathrin heavy chain CG9012-PE, isoform E [Drosophila melanogaster]	gi|161077848,gi|161077850,gi|17137000,gi|24642310,gi|45555323,gi|45555333	191165	1	27	27	138	0.000646	0.196	RPISADSAIMNPASK	R	V	0.95	34.5	36.7	0	0	1	0	2	1557.81	64	78	TRUE
Clathrin heavy chain CG9012-PE, isoform E [Drosophila melanogaster]	gi|161077848,gi|161077850,gi|17137000,gi|24642310,gi|45555323,gi|45555333	191165	1	27	27	138	0.000646	0.196	TPQTIQR	R	F	0.95	50	37.4	0	0	4	0	2	843.469	394	400	TRUE
Clathrin heavy chain CG9012-PE, isoform E [Drosophila melanogaster]	gi|161077848,gi|161077850,gi|17137000,gi|24642310,gi|45555323,gi|45555333	191165	1	27	27	138	0.000646	0.196	VAGAMQLYSVER	R	K	0.95	56.7	36.3	0	0	3	0	2	1323.67	177	188	TRUE
Clathrin heavy chain CG9012-PE, isoform E [Drosophila melanogaster]	gi|161077848,gi|161077850,gi|17137000,gi|24642310,gi|45555323,gi|45555333	191165	1	27	27	138	0.000646	0.196	VESWDDLVR	K	Y	0.95	57.6	37.2	0	0	3	0	2	1118.55	1148	1156	TRUE
Clathrin heavy chain CG9012-PE, isoform E [Drosophila melanogaster]	gi|161077848,gi|161077850,gi|17137000,gi|24642310,gi|45555323,gi|45555333	191165	1	27	27	138	0.000646	0.196	VHEGCVEPATHNALAK	R	I	0.95	42.7	36.6	0	0	0	1	2	1732.84	867	882	TRUE
Clathrin heavy chain CG9012-PE, isoform E [Drosophila melanogaster]	gi|161077848,gi|161077850,gi|17137000,gi|24642310,gi|45555323,gi|45555333	191165	1	27	27	138	0.000646	0.196	VIQCFAETGQFQK	K	I	0.95	83.2	36.6	0	0	8	0	2	1555.76	489	501	TRUE
Clathrin heavy chain CG9012-PE, isoform E [Drosophila melanogaster]	gi|161077848,gi|161077850,gi|17137000,gi|24642310,gi|45555323,gi|45555333	191165	1	27	27	138	0.000646	0.196	VSQAIEGHAASFATFK	K	I	0.95	62.1	36.4	0	0	4	0	2	1663.84	190	205	TRUE
Clathrin heavy chain CG9012-PE, isoform E [Drosophila melanogaster]	gi|161077848,gi|161077850,gi|17137000,gi|24642310,gi|45555323,gi|45555333	191165	1	27	27	138	0.000646	0.196	YDTIYLITK	K	Y	0.95	38.8	37.3	0	0	1	0	2	1129.61	270	278	TRUE
Aconitase CG9244-PB, isoform B [Drosophila melanogaster]	gi|17864292	85383.5	1	27	37	473	0.00221	0.417	AGIASEAQK	R	Y	0.95	76.6	38	0	0	11	0	2	874.463	320	328	TRUE
Aconitase CG9244-PB, isoform B [Drosophila melanogaster]	gi|17864292	85383.5	1	27	37	473	0.00221	0.417	APFGDELPAK	K	G	0.95	65.8	37.4	0	0	13	0	2	1044.54	534	543	TRUE
Aconitase CG9244-PB, isoform B [Drosophila melanogaster]	gi|17864292	85383.5	1	27	37	473	0.00221	0.417	CTTDHISAAGPWLK	K	Y	0.95	57	36.6	0	0	2	3	2	1556.75	600	613	TRUE
Aconitase CG9244-PB, isoform B [Drosophila melanogaster]	gi|17864292	85383.5	1	27	37	473	0.00221	0.417	DGISEVFDK	R	F	0.95	56.7	36	0	2	13	0	2	1009.48	438	446	TRUE
Aconitase CG9244-PB, isoform B [Drosophila melanogaster]	gi|17864292	85383.5	1	27	37	473	0.00221	0.417	EHAALEPR	R	H	0.95	44.6	36.3	0	0	4	0	2	922.475	680	687	TRUE
Aconitase CG9244-PB, isoform B [Drosophila melanogaster]	gi|17864292	85383.5	1	27	37	473	0.00221	0.417	EVYDFLASTCAK	K	Y	0.95	70.5	36.8	0	0	14	0	2	1403.65	156	167	TRUE
Aconitase CG9244-PB, isoform B [Drosophila melanogaster]	gi|17864292	85383.5	1	27	37	473	0.00221	0.417	FDSDVYLPYEK	K	L	0.95	69.1	36.6	0	0	20	0	2	1375.64	44	54	TRUE
Aconitase CG9244-PB, isoform B [Drosophila melanogaster]	gi|17864292	85383.5	1	27	37	473	0.00221	0.417	FGGTVLANACGPCIGQWDR	K	K	0.95	65.1	36.1	0	0	1	0	2	2078.95	447	465	TRUE
Aconitase CG9244-PB, isoform B [Drosophila melanogaster]	gi|17864292	85383.5	1	27	37	473	0.00221	0.417	GFDPGQDTYTAPPPSGENVK	K	V	0.95	129	36.4	0	0	81	0	2	2076.95	544	563	TRUE
Aconitase CG9244-PB, isoform B [Drosophila melanogaster]	gi|17864292	85383.5	1	27	37	473	0.00221	0.417	IPFNVTPGSEQIR	K	A	0.95	59.5	36.7	0	0	47	0	2	1457.78	420	432	TRUE
Aconitase CG9244-PB, isoform B [Drosophila melanogaster]	gi|17864292	85383.5	1	27	37	473	0.00221	0.417	LDFNPLTDELTGADGK	R	K	0.95	133	36.5	0	0	26	0	2	1705.83	513	528	TRUE
Aconitase CG9244-PB, isoform B [Drosophila melanogaster]	gi|17864292	85383.5	1	27	37	473	0.00221	0.417	LDFNPLTDELTGADGKK	R	F	0.95	74.1	36.5	0	0	12	8	2	1833.92	513	529	TRUE
Aconitase CG9244-PB, isoform B [Drosophila melanogaster]	gi|17864292	85383.5	1	27	37	473	0.00221	0.417	LKAPFGDELPAK	K	G	0.95	51.2	36.8	1.25	0	4	4	2	1285.72	532	543	TRUE
Aconitase CG9244-PB, isoform B [Drosophila melanogaster]	gi|17864292	85383.5	1	27	37	473	0.00221	0.417	LNRPLTLSEK	R	V	0.95	45.5	36.8	0	0	2	3	2	1170.68	66	75	TRUE
Aconitase CG9244-PB, isoform B [Drosophila melanogaster]	gi|17864292	85383.5	1	27	37	473	0.00221	0.417	LQLLEPFDK	R	W	0.95	53	37.4	0	0	18	0	2	1102.62	573	581	TRUE
Aconitase CG9244-PB, isoform B [Drosophila melanogaster]	gi|17864292	85383.5	1	27	37	473	0.00221	0.417	NDANPATHCFVTSPELVTALSIAGR	R	L	0.95	50.7	35.8	4.85	0	1	1	2	2641.3	488	512	TRUE
Aconitase CG9244-PB, isoform B [Drosophila melanogaster]	gi|17864292	85383.5	1	27	37	473	0.00221	0.417	NGSWGGVPDVAR	R	D	0.95	57.2	36.8	0	0	7	0	2	1214.59	645	656	TRUE
Aconitase CG9244-PB, isoform B [Drosophila melanogaster]	gi|17864292	85383.5	1	27	37	473	0.00221	0.417	QGLLPLTFANPADYDK	K	I	0.95	87.7	36.5	0	0	9	0	2	1762.9	710	725	TRUE
Aconitase CG9244-PB, isoform B [Drosophila melanogaster]	gi|17864292	85383.5	1	27	37	473	0.00221	0.417	RLEVVR	K	G	0.95	42.3	35.8	0	0	2	0	2	771.484	58	63	TRUE
Aconitase CG9244-PB, isoform B [Drosophila melanogaster]	gi|17864292	85383.5	1	27	37	473	0.00221	0.417	SLAPGKPVDAEIK	K	N	0.95	45.3	36.3	0	0	16	6	2	1324.75	739	751	TRUE
Aconitase CG9244-PB, isoform B [Drosophila melanogaster]	gi|17864292	85383.5	1	27	37	473	0.00221	0.417	SLAPGKPVDAEIKNGDKVER	K	I	0.95	35.3	36.1	0	0	0	2	2	2123.15	739	758	TRUE
Aconitase CG9244-PB, isoform B [Drosophila melanogaster]	gi|17864292	85383.5	1	27	37	473	0.00221	0.417	VADILTVK	K	G	0.95	69.6	37.7	0	0	26	0	2	858.53	258	265	TRUE
Aconitase CG9244-PB, isoform B [Drosophila melanogaster]	gi|17864292	85383.5	1	27	37	473	0.00221	0.417	VAVPSTVHCDHLIEAQIGGPK	K	D	0.95	112	36.2	0	0	3	8	2	2228.15	125	145	TRUE
Aconitase CG9244-PB, isoform B [Drosophila melanogaster]	gi|17864292	85383.5	1	27	37	473	0.00221	0.417	VGLIGSCTNSSYEDMGR	R	C	0.95	129	36.4	0	0	23	0	2	1845.81	387	403	TRUE
Aconitase CG9244-PB, isoform B [Drosophila melanogaster]	gi|17864292	85383.5	1	27	37	473	0.00221	0.417	VIGVNLTGK	K	I	0.95	55.5	37.2	0	1	14	0	2	900.552	236	244	TRUE
Aconitase CG9244-PB, isoform B [Drosophila melanogaster]	gi|17864292	85383.5	1	27	37	473	0.00221	0.417	VLYSHLDDPANQDIVR	K	G	0.95	99.6	36.3	0	0	28	3	2	1854.94	76	91	TRUE
Aconitase CG9244-PB, isoform B [Drosophila melanogaster]	gi|17864292	85383.5	1	27	37	473	0.00221	0.417	WVAVGDENYGEGSSR	K	E	0.95	121	36.3	0	0	35	0	2	1625.72	665	679	TRUE
bellwether CG3612-PA [Drosophila melanogaster]	gi|24658560	59405.3	1	27	35	476	0.00223	0.411	ADLEETGR	K	V	0.95	63.6	37.3	0	0	3	0	2	890.422	65	72	TRUE
bellwether CG3612-PA [Drosophila melanogaster]	gi|24658560	59405.3	1	27	35	476	0.00223	0.411	APGIIPR	K	V	0.95	52.5	35.4	0	0	21	0	2	723.452	175	181	TRUE
bellwether CG3612-PA [Drosophila melanogaster]	gi|24658560	59405.3	1	27	35	476	0.00223	0.411	AVDSLVPIGR	K	G	0.95	79	36	0	2	18	0	2	1026.59	194	203	TRUE
bellwether CG3612-PA [Drosophila melanogaster]	gi|24658560	59405.3	1	27	35	476	0.00223	0.411	DGAISEASDAK	K	L	0.95	89.4	36.9	0	0	14	0	2	1063.49	528	538	TRUE
bellwether CG3612-PA [Drosophila melanogaster]	gi|24658560	59405.3	1	27	35	476	0.00223	0.411	EAYPGDVFYLHSR	R	L	0.95	94.7	36.3	0	0	21	0	2	1553.74	334	346	TRUE
bellwether CG3612-PA [Drosophila melanogaster]	gi|24658560	59405.3	1	27	35	476	0.00223	0.411	EFLQHIK	K	T	0.95	36.3	37.5	0	0	1	0	2	914.51	509	515	TRUE
bellwether CG3612-PA [Drosophila melanogaster]	gi|24658560	59405.3	1	27	35	476	0.00223	0.411	EPMQTGIK	R	A	0.95	40.4	37.3	0	0	1	0	2	919.456	186	193	TRUE
bellwether CG3612-PA [Drosophila melanogaster]	gi|24658560	59405.3	1	27	35	476	0.00223	0.411	FNEAQDESK	R	K	0.95	73	36.1	0	0	13	0	2	1067.46	231	239	TRUE
bellwether CG3612-PA [Drosophila melanogaster]	gi|24658560	59405.3	1	27	35	476	0.00223	0.411	FNEAQDESKK	R	L	0.95	58.3	36.2	0	0	8	5	2	1195.56	231	240	TRUE
bellwether CG3612-PA [Drosophila melanogaster]	gi|24658560	59405.3	1	27	35	476	0.00223	0.411	GMALNLEPDNVGVVVFGNDK	K	L	0.95	142	36.3	0	0	13	0	2	2104.04	103	122	TRUE
bellwether CG3612-PA [Drosophila melanogaster]	gi|24658560	59405.3	1	27	35	476	0.00223	0.411	HALIIYDDLSK	K	Q	0.95	63.2	37	0	0	7	0	2	1287.69	305	315	TRUE
bellwether CG3612-PA [Drosophila melanogaster]	gi|24658560	59405.3	1	27	35	476	0.00223	0.411	LELAQYR	K	E	0.95	43.2	37	0	1	16	0	2	892.489	434	440	TRUE
bellwether CG3612-PA [Drosophila melanogaster]	gi|24658560	59405.3	1	27	35	476	0.00223	0.411	LTELLK	R	Q	0.95	37.9	38.4	0	0	5	0	2	716.456	466	471	TRUE
bellwether CG3612-PA [Drosophila melanogaster]	gi|24658560	59405.3	1	27	35	476	0.00223	0.411	QMSLLLR	R	R	0.95	57.7	38.1	0	0	9	0	2	860.503	322	328	TRUE
bellwether CG3612-PA [Drosophila melanogaster]	gi|24658560	59405.3	1	27	35	476	0.00223	0.411	RFNEAQDESK	K	K	0.95	60.5	36.2	0	0	4	0	2	1223.57	230	239	TRUE
bellwether CG3612-PA [Drosophila melanogaster]	gi|24658560	59405.3	1	27	35	476	0.00223	0.411	RFNEAQDESKK	K	L	0.95	42	36.5	0	0	0	3	2	1351.66	230	240	TRUE
bellwether CG3612-PA [Drosophila melanogaster]	gi|24658560	59405.3	1	27	35	476	0.00223	0.411	SAEISNILEER	R	I	0.95	74.8	37	0	1	50	0	2	1260.64	47	57	TRUE
bellwether CG3612-PA [Drosophila melanogaster]	gi|24658560	59405.3	1	27	35	476	0.00223	0.411	STVAQIVK	R	R	0.95	47.1	38	0	0	8	0	2	845.51	253	260	TRUE
bellwether CG3612-PA [Drosophila melanogaster]	gi|24658560	59405.3	1	27	35	476	0.00223	0.411	TALAIDTIINQK	K	R	0.95	107	36.8	0	0	45	0	2	1300.75	218	229	TRUE
bellwether CG3612-PA [Drosophila melanogaster]	gi|24658560	59405.3	1	27	35	476	0.00223	0.411	TGAIVDVPVGDELLGR	R	V	0.95	114	36.5	0	1	46	0	2	1610.88	133	148	TRUE
bellwether CG3612-PA [Drosophila melanogaster]	gi|24658560	59405.3	1	27	35	476	0.00223	0.411	TSEQALLDTIAK	K	D	0.95	112	37	0	1	62	0	2	1289.7	516	527	TRUE
bellwether CG3612-PA [Drosophila melanogaster]	gi|24658560	59405.3	1	27	35	476	0.00223	0.411	VLSIGDGIAR	R	V	0.95	75.2	37.2	0	1	15	0	2	1000.58	73	82	TRUE
bellwether CG3612-PA [Drosophila melanogaster]	gi|24658560	59405.3	1	27	35	476	0.00223	0.411	VVDALGNAIDGK	R	G	0.95	92.6	36.9	0	2	65	0	2	1171.63	149	160	TRUE
bellwether CG3612-PA [Drosophila melanogaster]	gi|24658560	59405.3	1	27	35	476	0.00223	0.411	VVDALGNAIDGKGAINTK	R	D	0.95	49	36.4	0	0	0	9	2	1755.96	149	166	TRUE
Na pump alpha subunit CG5670-PA, isoform A [Drosophila melanogaster]	gi|24648576,gi|24648578,gi|24648580,gi|45553435,gi|45553437,gi|45553439,gi|45553441	115591	1	24	29	209	0.000978	0.306	ADIGVAMGIAGSDVSK	K	Q	0.95	42.1	36.5	0	0	2	0	2	1506.75	746	761	TRUE
Na pump alpha subunit CG5670-PA, isoform A [Drosophila melanogaster]	gi|24648576,gi|24648578,gi|24648580,gi|45553435,gi|45553437,gi|45553439,gi|45553441	115591	1	24	29	209	0.000978	0.306	AEDLVLGDVVEVK	R	F	0.95	83.3	36.9	0	1	5	0	2	1385.75	200	212	TRUE
Na pump alpha subunit CG5670-PA, isoform A [Drosophila melanogaster]	gi|24648576,gi|24648578,gi|24648580,gi|45553435,gi|45553437,gi|45553439,gi|45553441	115591	1	24	29	209	0.000978	0.306	AVNDLTDSYGQEWTYR	K	D	0.95	103	36.4	0	0	6	0	2	1917.86	912	927	TRUE
Na pump alpha subunit CG5670-PA, isoform A [Drosophila melanogaster]	gi|24648576,gi|24648578,gi|24648580,gi|45553435,gi|45553437,gi|45553439,gi|45553441	115591	1	24	29	209	0.000978	0.306	DGPNALTPPK	R	Q	0.95	38.7	35.9	0	0	1	0	2	1009.53	93	102	TRUE
Na pump alpha subunit CG5670-PA, isoform A [Drosophila melanogaster]	gi|24648576,gi|24648578,gi|24648580,gi|45553435,gi|45553437,gi|45553439,gi|45553441	115591	1	24	29	209	0.000978	0.306	DVSSDQLDEILR	R	Y	0.95	95.3	36.8	0	0	26	0	2	1389.69	690	701	TRUE
Na pump alpha subunit CG5670-PA, isoform A [Drosophila melanogaster]	gi|24648576,gi|24648578,gi|24648580,gi|45553435,gi|45553437,gi|45553439,gi|45553441	115591	1	24	29	209	0.000978	0.306	EAFNNAYMELGGLGER	K	V	0.95	102	36.6	0	0	3	0	2	1770.81	554	569	TRUE
Na pump alpha subunit CG5670-PA, isoform A [Drosophila melanogaster]	gi|24648576,gi|24648578,gi|24648580,gi|45553435,gi|45553437,gi|45553439,gi|45553441	115591	1	24	29	209	0.000978	0.306	EVSGDASEAALLK	K	C	0.95	72.2	37	0	0	7	0	2	1289.66	464	476	TRUE
Na pump alpha subunit CG5670-PA, isoform A [Drosophila melanogaster]	gi|24648576,gi|24648578,gi|24648580,gi|45553435,gi|45553437,gi|45553439,gi|45553441	115591	1	24	29	209	0.000978	0.306	FNTDDINFPIDNLR	K	F	0.95	114	36.5	0	0	6	0	2	1693.82	589	602	TRUE
Na pump alpha subunit CG5670-PA, isoform A [Drosophila melanogaster]	gi|24648576,gi|24648578,gi|24648580,gi|45553435,gi|45553437,gi|45553439,gi|45553441	115591	1	24	29	209	0.000978	0.306	GAEFTHENPLETK	R	N	0.95	78.6	36.5	0	0	8	0	2	1472.7	246	258	TRUE
Na pump alpha subunit CG5670-PA, isoform A [Drosophila melanogaster]	gi|24648576,gi|24648578,gi|24648580,gi|45553435,gi|45553437,gi|45553439,gi|45553441	115591	1	24	29	209	0.000978	0.306	GVVISCGDHTVMGR	K	I	0.95	97.7	36.7	0	0	7	1	2	1487.71	274	287	TRUE
Na pump alpha subunit CG5670-PA, isoform A [Drosophila melanogaster]	gi|24648576,gi|24648578,gi|24648580,gi|45553435,gi|45553437,gi|45553439,gi|45553441	115591	1	24	29	209	0.000978	0.306	IAEVPFNSTNK	K	Y	0.95	53.9	36.7	0	0	9	0	2	1219.63	495	505	TRUE
Na pump alpha subunit CG5670-PA, isoform A [Drosophila melanogaster]	gi|24648576,gi|24648578,gi|24648580,gi|45553435,gi|45553437,gi|45553439,gi|45553441	115591	1	24	29	209	0.000978	0.306	IAGLASGLDTGETPIAK	R	E	0.95	104	36.7	0	0	24	0	2	1613.88	288	304	TRUE
Na pump alpha subunit CG5670-PA, isoform A [Drosophila melanogaster]	gi|24648576,gi|24648578,gi|24648580,gi|45553435,gi|45553437,gi|45553439,gi|45553441	115591	1	24	29	209	0.000978	0.306	ISPEELYQR	K	F	0.95	49.7	36.5	0	0	4	0	2	1134.58	64	72	TRUE
Na pump alpha subunit CG5670-PA, isoform A [Drosophila melanogaster]	gi|24648576,gi|24648578,gi|24648580,gi|45553435,gi|45553437,gi|45553439,gi|45553441	115591	1	24	29	209	0.000978	0.306	KEVSGDASEAALLK	K	C	0.95	39.6	36.7	0	0	1	0	2	1417.75	463	476	TRUE
Na pump alpha subunit CG5670-PA, isoform A [Drosophila melanogaster]	gi|24648576,gi|24648578,gi|24648580,gi|45553435,gi|45553437,gi|45553439,gi|45553441	115591	1	24	29	209	0.000978	0.306	LIFDNLK	R	K	0.95	43.6	37.3	0	0	2	0	2	862.504	785	791	TRUE
Na pump alpha subunit CG5670-PA, isoform A [Drosophila melanogaster]	gi|24648576,gi|24648578,gi|24648580,gi|45553435,gi|45553437,gi|45553439,gi|45553441	115591	1	24	29	209	0.000978	0.306	LNIPVSEVNPR	R	E	0.95	51.4	36.2	0	0	6	0	2	1237.69	666	676	TRUE
Na pump alpha subunit CG5670-PA, isoform A [Drosophila melanogaster]	gi|24648576,gi|24648578,gi|24648580,gi|45553435,gi|45553437,gi|45553439,gi|45553441	115591	1	24	29	209	0.000978	0.306	MGAIVAVTGDGVNDSPALK	R	K	0.95	143	36.6	0	0	11	0	2	1830.93	726	744	TRUE
Na pump alpha subunit CG5670-PA, isoform A [Drosophila melanogaster]	gi|24648576,gi|24648578,gi|24648580,gi|45553435,gi|45553437,gi|45553439,gi|45553441	115591	1	24	29	209	0.000978	0.306	NLAFFSTNAVEGTAK	K	G	0.95	115	36.5	0	0	4	0	2	1569.79	259	273	TRUE
Na pump alpha subunit CG5670-PA, isoform A [Drosophila melanogaster]	gi|24648576,gi|24648578,gi|24648580,gi|45553435,gi|45553437,gi|45553439,gi|45553441	115591	1	24	29	209	0.000978	0.306	NLEAVETLGSTSTICSDK	K	T	0.95	122	36.2	0	0	10	0	2	1924.92	378	395	TRUE
Na pump alpha subunit CG5670-PA, isoform A [Drosophila melanogaster]	gi|24648576,gi|24648578,gi|24648580,gi|45553435,gi|45553437,gi|45553439,gi|45553441	115591	1	24	29	209	0.000978	0.306	SVGIISEGNETVEDIAQR	K	L	0.95	112	36.4	0	0	12	1	2	1916.96	648	665	TRUE
Na pump alpha subunit CG5670-PA, isoform A [Drosophila melanogaster]	gi|24648576,gi|24648578,gi|24648580,gi|45553435,gi|45553437,gi|45553439,gi|45553441	115591	1	24	29	209	0.000978	0.306	VDNSSLTGESEPQSR	K	G	0.95	101	36.3	0	0	18	0	2	1605.74	231	245	TRUE
Na pump alpha subunit CG5670-PA, isoform A [Drosophila melanogaster]	gi|24648576,gi|24648578,gi|24648580,gi|45553435,gi|45553437,gi|45553439,gi|45553441	115591	1	24	29	209	0.000978	0.306	VIMVTGDHPITAK	K	A	0.95	63	36.2	0	0	7	2	2	1381.75	631	643	TRUE
Na pump alpha subunit CG5670-PA, isoform A [Drosophila melanogaster]	gi|24648576,gi|24648578,gi|24648580,gi|45553435,gi|45553437,gi|45553439,gi|45553441	115591	1	24	29	209	0.000978	0.306	VLGFCDFMLPSDK	R	Y	0.95	58.2	36.5	0	0	2	0	2	1544.71	570	582	TRUE
Na pump alpha subunit CG5670-PA, isoform A [Drosophila melanogaster]	gi|24648576,gi|24648578,gi|24648580,gi|45553435,gi|45553437,gi|45553439,gi|45553441	115591	1	24	29	209	0.000978	0.306	YQVSIHETEDTNDPR	K	Y	0.95	94.8	36.6	0	0	12	11	2	1803.82	506	520	TRUE
Larval serum protein 1 gamma CG6821-PA [Drosophila melanogaster]	gi|17647601	93395.1	1	24	29	120	0.000561	0.31	DIDFFNDETK	R	M	0.95	71.1	36.7	0	1	13	0	2	1243.55	271	280	TRUE
Larval serum protein 1 gamma CG6821-PA [Drosophila melanogaster]	gi|17647601	93395.1	1	24	29	120	0.000561	0.31	DPFFYTFYK	R	K	0.95	48.9	36.7	0	0	8	0	2	1227.57	476	484	TRUE
Larval serum protein 1 gamma CG6821-PA [Drosophila melanogaster]	gi|17647601	93395.1	1	24	29	120	0.000561	0.31	DWETFVR	K	N	0.95	40.1	36.1	0	0	7	0	2	952.453	117	123	TRUE
Larval serum protein 1 gamma CG6821-PA [Drosophila melanogaster]	gi|17647601	93395.1	1	24	29	120	0.000561	0.31	EFSWTAEDR	K	I	0.95	43.1	36.1	0	0	6	0	2	1140.5	627	635	TRUE
Larval serum protein 1 gamma CG6821-PA [Drosophila melanogaster]	gi|17647601	93395.1	1	24	29	120	0.000561	0.31	ENLSQFVNDPK	R	Y	0.95	54.3	36.9	0	0	5	0	2	1290.63	241	251	TRUE
Larval serum protein 1 gamma CG6821-PA [Drosophila melanogaster]	gi|17647601	93395.1	1	24	29	120	0.000561	0.31	FDYEVFSK	K	L	0.95	50	37	0	2	5	0	2	1034.48	179	186	TRUE
Larval serum protein 1 gamma CG6821-PA [Drosophila melanogaster]	gi|17647601	93395.1	1	24	29	120	0.000561	0.31	FTDVFYTFK	K	Y	0.95	53	36.2	0	0	1	0	2	1167.57	486	494	TRUE
Larval serum protein 1 gamma CG6821-PA [Drosophila melanogaster]	gi|17647601	93395.1	1	24	29	120	0.000561	0.31	FVDTKPFGYPFDR	R	Q	0.95	58.1	36.5	2.54	0	0	3	2	1588.78	715	727	TRUE
Larval serum protein 1 gamma CG6821-PA [Drosophila melanogaster]	gi|17647601	93395.1	1	24	29	120	0.000561	0.31	FYMPVDYTR	K	D	0.95	49.8	36.9	0	0	3	0	2	1191.55	262	270	TRUE	gi|17136306
Larval serum protein 1 gamma CG6821-PA [Drosophila melanogaster]	gi|17647601	93395.1	1	24	29	120	0.000561	0.31	GEFFGALVK	K	T	0.95	51.1	35.8	0	0	10	0	2	967.525	91	99	TRUE	gi|24641542
Larval serum protein 1 gamma CG6821-PA [Drosophila melanogaster]	gi|17647601	93395.1	1	24	29	120	0.000561	0.31	IDEPLMFEEWIK	R	M	0.95	57	36.4	0	0	3	0	2	1565.76	45	56	TRUE
Larval serum protein 1 gamma CG6821-PA [Drosophila melanogaster]	gi|17647601	93395.1	1	24	29	120	0.000561	0.31	ITYTELYK	R	Y	0.95	49.8	37.4	0	0	4	0	2	1030.55	636	643	TRUE
Larval serum protein 1 gamma CG6821-PA [Drosophila melanogaster]	gi|17647601	93395.1	1	24	29	120	0.000561	0.31	IVGNYLQGNADTFDK	K	Y	0.95	88.5	36.5	0	0	6	0	2	1654.81	424	438	TRUE
Larval serum protein 1 gamma CG6821-PA [Drosophila melanogaster]	gi|17647601	93395.1	1	24	29	120	0.000561	0.31	KFYMPVDYTR	K	D	0.95	34.3	36.6	0	0	1	0	2	1319.65	261	270	TRUE	gi|17136306
Larval serum protein 1 gamma CG6821-PA [Drosophila melanogaster]	gi|17647601	93395.1	1	24	29	120	0.000561	0.31	LGALLPK	K	G	0.95	51.6	34.6	0	0	6	0	2	711.477	84	90	TRUE
Larval serum protein 1 gamma CG6821-PA [Drosophila melanogaster]	gi|17647601	93395.1	1	24	29	120	0.000561	0.31	MMGLDQEWYVEDK	K	Y	0.95	77.5	36.5	0	0	5	0	2	1659.7	224	236	TRUE
Larval serum protein 1 gamma CG6821-PA [Drosophila melanogaster]	gi|17647601	93395.1	1	24	29	120	0.000561	0.31	MTFVDGQYIWDK	K	A	0.95	80.5	36.7	0	0	6	0	2	1502.7	539	550	TRUE
Larval serum protein 1 gamma CG6821-PA [Drosophila melanogaster]	gi|17647601	93395.1	1	24	29	120	0.000561	0.31	NYYDFYTYGK	K	F	0.95	36.7	36.6	0	0	1	0	2	1333.57	374	383	TRUE
Larval serum protein 1 gamma CG6821-PA [Drosophila melanogaster]	gi|17647601	93395.1	1	24	29	120	0.000561	0.31	TADGQVFDLHKPEAIK	K	I	0.95	58.3	36.4	0	0	6	2	2	1768.92	408	423	TRUE
Larval serum protein 1 gamma CG6821-PA [Drosophila melanogaster]	gi|17647601	93395.1	1	24	29	120	0.000561	0.31	VIPLDYNR	R	K	0.95	47.4	37.3	0	0	1	0	2	989.542	594	601	TRUE
Larval serum protein 1 gamma CG6821-PA [Drosophila melanogaster]	gi|17647601	93395.1	1	24	29	120	0.000561	0.31	VLETGFYK	K	T	0.95	49.2	36.4	0	1	7	0	2	956.509	400	407	TRUE
Larval serum protein 1 gamma CG6821-PA [Drosophila melanogaster]	gi|17647601	93395.1	1	24	29	120	0.000561	0.31	VYYVDTFAK	K	Y	0.95	41.6	36.9	0	0	3	0	2	1105.56	746	754	TRUE
Larval serum protein 1 gamma CG6821-PA [Drosophila melanogaster]	gi|17647601	93395.1	1	24	29	120	0.000561	0.31	YDFPLDISEPHNAFPDR	K	L	0.95	95	36.3	0	0	2	1	2	2032.94	653	669	TRUE
Larval serum protein 1 gamma CG6821-PA [Drosophila melanogaster]	gi|17647601	93395.1	1	24	29	120	0.000561	0.31	YVMLASEGK	K	Y	0.95	34.4	36.7	0	0	1	0	2	1013.5	644	652	TRUE
Cytochrome P450-4g1 CG3972-PA [Drosophila melanogaster]	gi|17933498	62954.7	1	24	31	601	0.00281	0.39	AIFGDNMLR	K	D	0.95	78.3	36.2	0	0	8	0	2	1052.52	388	396	TRUE
Cytochrome P450-4g1 CG3972-PA [Drosophila melanogaster]	gi|17933498	62954.7	1	24	31	601	0.00281	0.39	AIVEEISTPVASTPASK	R	K	0.95	105	36.4	0	1	110	0	2	1699.91	286	302	TRUE
Cytochrome P450-4g1 CG3972-PA [Drosophila melanogaster]	gi|17933498	62954.7	1	24	31	601	0.00281	0.39	DCTFADTMEMK	R	Y	0.95	70.9	36.7	0	0	33	0	2	1348.52	397	407	TRUE
Cytochrome P450-4g1 CG3972-PA [Drosophila melanogaster]	gi|17933498	62954.7	1	24	31	601	0.00281	0.39	DDLDDIDENDVGAK	R	R	0.95	78.4	36.5	0	0	14	0	2	1533.66	308	321	TRUE
Cytochrome P450-4g1 CG3972-PA [Drosophila melanogaster]	gi|17933498	62954.7	1	24	31	601	0.00281	0.39	EGLRDDLDDIDENDVGAK	K	R	0.95	130	36.2	0	0	35	19	2	1988.91	304	321	TRUE
Cytochrome P450-4g1 CG3972-PA [Drosophila melanogaster]	gi|17933498	62954.7	1	24	31	601	0.00281	0.39	FDPDNFLPER	K	M	0.95	72.3	36.7	0	0	45	0	2	1249.59	469	478	TRUE
Cytochrome P450-4g1 CG3972-PA [Drosophila melanogaster]	gi|17933498	62954.7	1	24	31	601	0.00281	0.39	KEGLRDDLDDIDENDVGAK	K	R	0.95	105	36.3	0	0	8	14	2	2117	303	321	TRUE
Cytochrome P450-4g1 CG3972-PA [Drosophila melanogaster]	gi|17933498	62954.7	1	24	31	601	0.00281	0.39	KENFQEESR	R	A	0.95	63.2	36.1	0	0	3	1	2	1166.54	277	285	TRUE
Cytochrome P450-4g1 CG3972-PA [Drosophila melanogaster]	gi|17933498	62954.7	1	24	31	601	0.00281	0.39	LALLDAMVEMAK	R	N	0.95	98.4	36.5	0	0	21	0	2	1320.69	324	335	TRUE
Cytochrome P450-4g1 CG3972-PA [Drosophila melanogaster]	gi|17933498	62954.7	1	24	31	601	0.00281	0.39	LASGPYTVPK	K	G	0.95	67.3	37.2	0	0	23	0	2	1032.57	436	445	TRUE
Cytochrome P450-4g1 CG3972-PA [Drosophila melanogaster]	gi|17933498	62954.7	1	24	31	601	0.00281	0.39	LDSIYK	R	F	0.95	40	34.8	0	0	5	0	2	738.404	245	250	TRUE
Cytochrome P450-4g1 CG3972-PA [Drosophila melanogaster]	gi|17933498	62954.7	1	24	31	601	0.00281	0.39	LENGFNVSLEK	K	R	0.95	65.1	36.5	0	0	8	0	2	1249.64	539	549	TRUE
Cytochrome P450-4g1 CG3972-PA [Drosophila melanogaster]	gi|17933498	62954.7	1	24	31	601	0.00281	0.39	LQADIILK	K	L	0.95	57	36.3	0	0	12	0	2	913.572	531	538	TRUE
Cytochrome P450-4g1 CG3972-PA [Drosophila melanogaster]	gi|17933498	62954.7	1	24	31	601	0.00281	0.39	MIAPTFHQSILK	K	S	0.95	65.8	36.8	0	0	13	0	2	1385.76	154	165	TRUE
Cytochrome P450-4g1 CG3972-PA [Drosophila melanogaster]	gi|17933498	62954.7	1	24	31	601	0.00281	0.39	MMNIILGMTSK	R	V	0.95	76.5	36.8	0	0	32	0	2	1270.62	261	271	TRUE
Cytochrome P450-4g1 CG3972-PA [Drosophila melanogaster]	gi|17933498	62954.7	1	24	31	601	0.00281	0.39	NPDIEWNEK	K	D	0.95	35.7	37.2	0	0	2	0	2	1144.53	336	344	TRUE
[truncated: 4,702 more rows]

## Sheet: Unique Peptides
Peptide	Protein
ITTHYTLNPR	CG12140 CG12140-PA [Drosophila melanogaster]
[truncated: 5,168 more rows]

## Sheet: Human Homologues
								Homologene	Homologene	Homologene	Ensemble Compara	Ensemble Compara	Ensemble Compara
[truncated: 1,229 more rows]

[truncated: 1 more sheets: Distribution of Spectra]
