# Supplementary material for: A Mighty Small Heart: The Cardiac Proteome of Adult Drosophila melanogaster
Source: PLoS One. 2011 Apr 25;6(4):e18497. doi: 10.1371/journal.pone.0018497 (PMC3081823; doi:10.1371/journal.pone.0018497)
Supplement: Table S2 — Assigned Spectra Panel 1. Read Me covers caveats associated with using these table(s). Panel 2: List of each spectrum file assigned to a given peptide. (XLSX) [file pone.0018497.s002.xlsx]

## Sheet: Read Me!
Using These Tables
Caveats and Limitations
1. Protein identification with multiple gi accession numbers (Protein Clusters)
	There are two principal reasons why an identified protein may have more than one gi accesssion number:
	1. The Scaffold program groups all proteins that can be identified by a minimal set of peptides. As a result, multiple protein isoforms, each with its on accession number, may be grouped together. Consequently, if a specfic isoform is named in the list users should should check for alternate accession numbers denoting indistinguishable isoforms. Only protein isoforms identified by a unique spectr…
	2. A protein with identical sequence may be associated with more than one accession number.
2. Protein Probabilities
	The protein list herein includes entries listed with 50% identification probability, according to Protein Prophet, as implemented by Scaffold. Indeed, upon curation nearly 50% of the provisionally-accepted single-hit proteins failed to meet any of the 3 criteria for final acceptance outlined in the online methods supplement. The remaining proteins have at least one peptide identified with 90% pro…
3. ID Mapping to UniprotKB
	For the purposes or extracting functional annotation, gi numbers were mapped to their corresponding entries in the UniProtKB database.
	If identified proteins were identified by multiple gi accession numbers, a single accession was chosen for mapping.
	Therefore, Uniprot Accessions may denote specific isoforms which may or may not have been identified uniquely by the mass spectral data.
	This does not adversely affect Gene Ontology annotation, but end-users are cautioned not to use UniprotKB Accessions as evidence that a specific isoform has been identified.
	Always refer back to the original Protein and Peptide identificaton lists to determine whether a specific isoform has been identified.
4. Identification of Human Homologues
	Currently available batch homology search sites use UniprotKB Accessions rather than gi Accessions for input lists.
	Mapping gi to UniprotKB comes with its own caveats (see above).						.
	Human homologues of Drosophila proteins were retrieved from Homologene and Ensemble Compara databases
	These searches are intended to identiify the closest functional relative across species. Owing to the potential compounding issues of ID-mapping and cross-species searching, users are cautioned not to place undue emphasis on specific human isoforms.
	For cross-species experimental design inspired by the Drosophila data, users are encouraged to chose peptide sequences of interest and perform BLAST searches.

## Sheet: Spectrum Report
Drosophila Dec 09_Condensed, Spectrum report created on 01/06/2010
	Database Set:
		Database Name: D:\Databases\drosophila\drosophila_refseq_092408.fasta
			Version: Custom: All D. melanogaster Refseq entries as of 092408
			Taxonomy: Drosophila melanogaster
			Number of Proteins: 20735
	Search Engine Set: 2 Search Engines
		Search Engine: Mascot
			Version: Mascot
			Samples: All Samples
			Fragment Tolerance: 0.80 Da (Monoisotopic)
			Parent Tolerance: 1.5 Da (Monoisotopic)
			Fixed Modifications: +57 on C (Carbamidomethyl)
			Variable Modifications: +16 on M (Oxidation)
			Database: Drosophila_20080924.fasta (custom version, 20735 entries)
			Digestion Enzyme: Trypsin
			Max Missed Cleavages: 3
		Search Engine: X! Tandem
			Version: 2007.01.01.1
			Samples: All Samples
			Fragment Tolerance: 0.80 Da (Monoisotopic)
			Parent Tolerance: 1.5 Da (Monoisotopic)
			Fixed Modifications: +57 on C (Carbamidomethyl)
			Variable Modifications: +16 on M (Oxidation)
			Database: D:\Databases\drosophila\drosophila_refseq_092408.fasta (custom version, 20735 entries)
			Digestion Enzyme: Trypsin
			Max Missed Cleavages: 2
	Scaffold Version: Scaffold_2_05_02
		Peptide Thresholds: 90.0% minimum
		Protein Thresholds: 50.0% minimum and 1 peptide minimum
Protein name	Protein Accession Numbers	Molecular Weight (Da)	Protein ident.probability	Unique Peptides	Unique Spectra	Total Spectra	% total spectra	% Sequence Coverage	Assigned	Spectrum Name	Peptide Sequence	Prev Amino Acid	Next Amino Acid	Peptide Ident.Probability	Mascot Score	Mascot Ident Score	X!Tandem Score	Enzymatic Termini	Fixed Mods	Observed m/z	Actual mass (AMU)	Calc +1H Mass (AMU)	Charge	delta (AMU)	delta (PPM)	Peptide Start	Peptide Stop	Exclusive	Other Proteins
Myosin heavy chain CG17927-PA, isoform A [Drosophila melanogaster]	gi|24584704,gi|28574239	224597	1	128	186	2330	0.0109	0.549	TRUE	ScaffoldIDNumber_232755_A9.3759.3759.3.dta	NVQQVTNSIGALcK	R	G	0.95	0	0	2.66	2	c13: Carbamidomethyl (+57.02)	512.02	1533.04	1531.79	3	2.253	1469	415	428	TRUE	gi|24584700,gi|24584706,gi|24584710,gi|24584702,gi|24584712,gi|24584698
Myosin heavy chain CG17927-PA, isoform A [Drosophila melanogaster]	gi|24584704,gi|28574239	224597	1	128	186	2330	0.0109	0.549	TRUE	A9.2859.2859.2.dta	GAYEEGQEQLEAVR	K	R	0.95	0	0	2.6	2		527.581	1053.15	1578.74	2	-524.6	-497600	1485	1498	TRUE	gi|24584700,gi|24584706,gi|24584710,gi|24584702,gi|24584712,gi|24584698
Myosin heavy chain CG17927-PA, isoform A [Drosophila melanogaster]	gi|24584704,gi|28574239	224597	1	128	186	2330	0.0109	0.549	TRUE	S_G2.5267.5267.3.dta	NKDPLNDTVVDQFK	K	K	0.95	0	0	2.7	2		545.629	1633.86	1632.82	3	2.049	1253	597	610	TRUE	gi|24584700,gi|24584706,gi|24584710,gi|24584702,gi|24584712,gi|24584698
Myosin heavy chain CG17927-PA, isoform A [Drosophila melanogaster]	gi|24584704,gi|28574239	224597	1	128	186	2330	0.0109	0.549	TRUE	S_E912.5249.5249.3.dta	NKDPLNDTVVDQFK	K	K	0.95	0	0	2.68	2		545.679	1634.01	1632.82	3	2.198	1344	597	610	TRUE	gi|24584700,gi|24584706,gi|24584710,gi|24584702,gi|24584712,gi|24584698
Myosin heavy chain CG17927-PA, isoform A [Drosophila melanogaster]	gi|24584704,gi|28574239	224597	1	128	186	2330	0.0109	0.549	TRUE	S_F912.4434.4434.2.dta	NKDPLNDTVVDQFKK	K	S	0.95	0	0	2.19	2		588.659	1175.3	1760.92	2	-584.6	-497000	597	611	TRUE	gi|24584700,gi|24584706,gi|24584710,gi|24584702,gi|24584712,gi|24584698
Myosin heavy chain CG17927-PA, isoform A [Drosophila melanogaster]	gi|24584704,gi|28574239	224597	1	128	186	2330	0.0109	0.549	TRUE	S_E912.4747.4747.3.dta	TGEELQAAEDKINHLNK	K	V	0.95	0	0	2.62	2		638.059	1911.15	1909.96	3	2.2	1151	1005	1021	TRUE	gi|24584700,gi|24584706,gi|24584710,gi|24584702,gi|24584712,gi|24584698
Myosin heavy chain CG17927-PA, isoform A [Drosophila melanogaster]	gi|24584704,gi|28574239	224597	1	128	186	2330	0.0109	0.549	TRUE	S_A10Dros.3126.3126.2.dta	DLEEANIQHESTLANLR	R	K	0.95	0	0	2.35	2		652.317	1302.62	1952.97	2	-649.3	-498100	1176	1192	TRUE	gi|24584700,gi|24584706,gi|24584710,gi|24584702,gi|24584712,gi|24584698
Myosin heavy chain CG17927-PA, isoform A [Drosophila melanogaster]	gi|24584704,gi|28574239	224597	1	128	186	2330	0.0109	0.549	TRUE	S_F1.5161.5161.3.dta	DLEEANIQHESTLANLR	R	K	0.95	0	0	2.68	2		652.457	1954.35	1952.97	3	2.387	1221	1176	1192	TRUE	gi|24584700,gi|24584706,gi|24584710,gi|24584702,gi|24584712,gi|24584698
Myosin heavy chain CG17927-PA, isoform A [Drosophila melanogaster]	gi|24584704,gi|28574239	224597	1	128	186	2330	0.0109	0.549	TRUE	S_F912.7643.7643.3.dta	GSLEDQVVQTNPVLEAFGNAK	K	T	0.95	0	0	4.82	2		739.971	2216.89	2216.12	3	1.778	801.8	213	233	TRUE	gi|24584700,gi|24584706,gi|24584710,gi|24584702,gi|24584712,gi|24584698
Myosin heavy chain CG17927-PA, isoform A [Drosophila melanogaster]	gi|24584704,gi|28574239	224597	1	128	186	2330	0.0109	0.549	TRUE	S_F912.7634.7634.3.dta	GSLEDQVVQTNPVLEAFGNAK	K	T	0.95	0	0	4.64	2		740.028	2217.06	2216.12	3	1.948	878	213	233	TRUE	gi|24584700,gi|24584706,gi|24584710,gi|24584702,gi|24584712,gi|24584698
Myosin heavy chain CG17927-PA, isoform A [Drosophila melanogaster]	gi|24584704,gi|28574239	224597	1	128	186	2330	0.0109	0.549	TRUE	S_F911.6843.6843.2.dta	AEDmSNLTYLNDASVLHNLR	K	Q	0.95	0	0	2.85	2	m4: Oxidation (+15.99)	765.203	1528.39	2292.09	2	-762.7	-498700	88	107	TRUE	gi|24584700,gi|24584706,gi|24584710,gi|24584702,gi|24584712
Myosin heavy chain CG17927-PA, isoform A [Drosophila melanogaster]	gi|24584704,gi|28574239	224597	1	128	186	2330	0.0109	0.549	TRUE	S_G2.7333.7333.2.dta	AEDmSNLTYLNDASVLHNLR	K	Q	0.95	0	0	2.26	2	m4: Oxidation (+15.99)	765.238	1528.46	2292.09	2	-762.6	-498600	88	107	TRUE	gi|24584700,gi|24584706,gi|24584710,gi|24584702,gi|24584712
Myosin heavy chain CG17927-PA, isoform A [Drosophila melanogaster]	gi|24584704,gi|28574239	224597	1	128	186	2330	0.0109	0.549	TRUE	ScaffoldIDNumber_109571_S_E8.6831.6831.3.dta	AEDmSNLTYLNDASVLHNLR	K	Q	0.95	0	0	2.62	2	m4: Oxidation (+15.99)	765.381	2293.12	2292.09	3	2.035	887.3	88	107	TRUE	gi|24584700,gi|24584706,gi|24584710,gi|24584702,gi|24584712
Myosin heavy chain CG17927-PA, isoform A [Drosophila melanogaster]	gi|24584704,gi|28574239	224597	1	128	186	2330	0.0109	0.549	TRUE	S_F912.6861.6861.3.dta	AEDmSNLTYLNDASVLHNLR	K	Q	0.95	0	0	2.85	2	m4: Oxidation (+15.99)	765.504	2293.49	2292.09	3	2.402	1047	88	107	TRUE	gi|24584700,gi|24584706,gi|24584710,gi|24584702,gi|24584712
Myosin heavy chain CG17927-PA, isoform A [Drosophila melanogaster]	gi|24584704,gi|28574239	224597	1	128	186	2330	0.0109	0.549	TRUE	S_F912.6853.6853.3.dta	AEDmSNLTYLNDASVLHNLR	K	Q	0.95	0	0	2.85	2	m4: Oxidation (+15.99)	765.794	2294.36	2292.09	3	3.272	1426	88	107	TRUE	gi|24584700,gi|24584706,gi|24584710,gi|24584702,gi|24584712
Myosin heavy chain CG17927-PA, isoform A [Drosophila melanogaster]	gi|24584704,gi|28574239	224597	1	128	186	2330	0.0109	0.549	TRUE	S_E911.7297.7297.3.dta	SKGSLEDQVVQTNPVLEAFGNAK	K	T	0.95	0	0	4.28	2		811.849	2432.52	2431.25	3	2.285	939.1	211	233	TRUE	gi|24584700,gi|24584706,gi|24584710,gi|24584702,gi|24584712,gi|24584698
Myosin heavy chain CG17927-PA, isoform A [Drosophila melanogaster]	gi|24584704,gi|28574239	224597	1	128	186	2330	0.0109	0.549	TRUE	S_F912.6708.6708.3.dta	qAEQELADAHEQLNEVSAQNASISAAK	R	R	0.95	0	0	5.8	2	n-term: Pyro-cmC (-17.03)	946.236	2835.68	2835.34	3	1.353	476.9	1700	1726	TRUE	gi|24584700,gi|24584706,gi|24584710,gi|24584702,gi|24584712,gi|24584698
Myosin heavy chain CG17927-PA, isoform A [Drosophila melanogaster]	gi|24584704,gi|28574239	224597	1	128	186	2330	0.0109	0.549	TRUE	S_E912.6641.6641.3.dta	qAEQELADAHEQLNEVSAQNASISAAK	R	R	0.95	0	0	3.43	2	n-term: Pyro-cmC (-17.03)	946.272	2835.79	2835.34	3	1.461	514.9	1700	1726	TRUE	gi|24584700,gi|24584706,gi|24584710,gi|24584702,gi|24584712,gi|24584698
Myosin heavy chain CG17927-PA, isoform A [Drosophila melanogaster]	gi|24584704,gi|28574239	224597	1	128	186	2330	0.0109	0.549	TRUE	S_F1.6491.6491.3.dta	qAEQELADAHEQLNEVSAQNASISAAK	R	R	0.95	0	0	6	2	n-term: Pyro-cmC (-17.03)	946.409	2836.2	2835.34	3	1.871	659.3	1700	1726	TRUE	gi|24584700,gi|24584706,gi|24584710,gi|24584702,gi|24584712,gi|24584698
Myosin heavy chain CG17927-PA, isoform A [Drosophila melanogaster]	gi|24584704,gi|28574239	224597	1	128	186	2330	0.0109	0.549	TRUE	ScaffoldIDNumber_459769_S_G2.5960.5960.3.dta	QAEQELADAHEQLNEVSAQNASISAAK	R	R	0.95	0	0	3.17	2		951.962	2852.86	2852.37	3	1.505	527.5	1700	1726	TRUE	gi|24584700,gi|24584706,gi|24584710,gi|24584702,gi|24584712,gi|24584698
Myosin heavy chain CG17927-PA, isoform A [Drosophila melanogaster]	gi|24584704,gi|28574239	224597	1	128	186	2330	0.0109	0.549	TRUE	S_F911.5394.5394.3.dta	QAEQELADAHEQLNEVSAQNASISAAK	R	R	0.95	0	0	4.09	2		952.027	2853.06	2852.37	3	1.7	595.7	1700	1726	TRUE	gi|24584700,gi|24584706,gi|24584710,gi|24584702,gi|24584712,gi|24584698
Myosin heavy chain CG17927-PA, isoform A [Drosophila melanogaster]	gi|24584704,gi|28574239	224597	1	128	186	2330	0.0109	0.549	TRUE	S_F912.5838.5838.2.dta	QAEQELADAHEQLNEVSAQNASISAAK	R	R	0.95	0	0	2.8	2		952.159	1902.3	2852.37	2	-949.1	-498600	1700	1726	TRUE	gi|24584700,gi|24584706,gi|24584710,gi|24584702,gi|24584712,gi|24584698
Myosin heavy chain CG17927-PA, isoform A [Drosophila melanogaster]	gi|24584704,gi|28574239	224597	1	128	186	2330	0.0109	0.549	TRUE	S_E9.5132.5132.3.dta	QAEQELADAHEQLNEVSAQNASISAAK	R	R	0.95	0	0	2.64	2		952.182	2853.52	2852.37	3	2.163	757.9	1700	1726	TRUE	gi|24584700,gi|24584706,gi|24584710,gi|24584702,gi|24584712,gi|24584698
Myosin heavy chain CG17927-PA, isoform A [Drosophila melanogaster]	gi|24584704,gi|28574239	224597	1	128	186	2330	0.0109	0.549	TRUE	S_G3.5360.5360.3.dta	QAEQELADAHEQLNEVSAQNASISAAK	R	R	0.95	0	0	5.7	2		952.206	2853.59	2852.37	3	2.236	783.4	1700	1726	TRUE	gi|24584700,gi|24584706,gi|24584710,gi|24584702,gi|24584712,gi|24584698
Myosin heavy chain CG17927-PA, isoform A [Drosophila melanogaster]	gi|24584704,gi|28574239	224597	1	128	186	2330	0.0109	0.549	TRUE	ScaffoldIDNumber_417367_S_F912.5849.5849.3.dta	QAEQELADAHEQLNEVSAQNASISAAK	R	R	0.95	0	0	3.52	2		952.394	2854.16	2852.37	3	2.8	980.8	1700	1726	TRUE	gi|24584700,gi|24584706,gi|24584710,gi|24584702,gi|24584712,gi|24584698
Myosin heavy chain CG17927-PA, isoform A [Drosophila melanogaster]	gi|24584704,gi|28574239	224597	1	128	186	2330	0.0109	0.549	TRUE	S_E911.5143.5143.3.dta	QAEQELADAHEQLNEVSAQNASISAAK	R	R	0.95	0	0	2.62	2		952.41	2854.21	2852.37	3	2.849	998	1700	1726	TRUE	gi|24584700,gi|24584706,gi|24584710,gi|24584702,gi|24584712,gi|24584698
Myosin heavy chain CG17927-PA, isoform A [Drosophila melanogaster]	gi|24584704,gi|28574239	224597	1	128	186	2330	0.0109	0.549	TRUE	S_F912.5269.5269.3.dta	QAEQELADAHEQLNEVSAQNASISAAK	R	R	0.95	0	0	2.96	2		952.428	2854.26	2852.37	3	2.903	1017	1700	1726	TRUE	gi|24584700,gi|24584706,gi|24584710,gi|24584702,gi|24584712,gi|24584698
Myosin heavy chain CG17927-PA, isoform A [Drosophila melanogaster]	gi|24584704,gi|28574239	224597	1	128	186	2330	0.0109	0.549	TRUE	S_E911.4464.4464.3.dta	QAEQELADAHEQLNEVSAQNASISAAK	R	R	0.95	0	0	3.72	2		952.491	2854.45	2852.37	3	3.092	1083	1700	1726	TRUE	gi|24584700,gi|24584706,gi|24584710,gi|24584702,gi|24584712,gi|24584698
bent CG32019-PA, isoform A [Drosophila melanogaster]	gi|28558739,gi|45552153	1.00129e+06	1	118	128	787	0.00368	0.191	TRUE	S_A10Dros.2232.2232.3.dta	AGFSDPSDATEPHLAKPR	K	N	0.95	0	0	2.64	2		633.283	1896.82	1895.93	3	1.907	1005	3191	3208	TRUE
bent CG32019-PA, isoform A [Drosophila melanogaster]	gi|28558739,gi|45552153	1.00129e+06	1	118	128	787	0.00368	0.191	TRUE	ScaffoldIDNumber_197696_S_E912.5888.5888.3.dta	YIEQPIKPAPLPIVTSR	K	Q	0.95	0	0	3.92	2		642.184	1923.53	1922.11	3	2.426	1260	8559	8575	TRUE
bent CG32019-PA, isoform A [Drosophila melanogaster]	gi|28558739,gi|45552153	1.00129e+06	1	118	128	787	0.00368	0.191	TRUE	S_G1.5142.5142.3.dta	SDGPEYNVDGLVPGHDYK	R	F	0.95	0	0	3.64	2		655.244	1962.71	1961.89	3	1.828	930.9	4547	4564	TRUE
bent CG32019-PA, isoform A [Drosophila melanogaster]	gi|28558739,gi|45552153	1.00129e+06	1	118	128	787	0.00368	0.191	TRUE	S_F910.2864.2864.3.dta	AINAAGPGEPSDASKPIITKPR	K	K	0.95	0	0	2.49	2		731.329	2190.96	2190.19	3	1.784	813.8	4375	4396	TRUE
bent CG32019-PA, isoform A [Drosophila melanogaster]	gi|28558739,gi|45552153	1.00129e+06	1	118	128	787	0.00368	0.191	TRUE	ScaffoldIDNumber_10829_S_A10Dros.3771.3771.3.dta	VSAVNEEGESEPLTTLVGVVAK	R	D	0.95	0	0	2.47	2		743.956	2228.84	2228.17	3	1.686	756.3	2784	2805	TRUE
terribly reduced optic lobes CG33950-PF, isoform F [Drosophila melanogaster]	gi|78706474	513388	1	89	107	871	0.00408	0.237	TRUE	S_G1.6460.6460.3.dta	TDSQILVLTNLRPEDAGR	R	Y	0.95	0	0	2.59	2		667.738	2000.19	1998.06	3	3.136	1567	3684	3701	TRUE	gi|161077537
terribly reduced optic lobes CG33950-PF, isoform F [Drosophila melanogaster]	gi|78706474	513388	1	89	107	871	0.00408	0.237	TRUE	ScaffoldIDNumber_236547_A9.3428.3428.3.dta	LIWSRPDGNENQEEYNVR	K	L	0.95	0	0	3.21	2		741.379	2221.11	2219.05	3	3.074	1384	2689	2706	TRUE	gi|161077537
terribly reduced optic lobes CG33950-PF, isoform F [Drosophila melanogaster]	gi|78706474	513388	1	89	107	871	0.00408	0.237	TRUE	S_F2.4278.4278.3.dta	RcEQcAAGYQGNPLAAGGIcR	R	R	0.95	0	0	6.49	2	c2: Carbamidomethyl (+57.02), c5: Carbamidomethyl (+57.02), c20: Carbamidomethyl (+57.02)	771.134	2310.38	2309.03	3	2.353	1018	2147	2167	TRUE	gi|161077537
terribly reduced optic lobes CG33950-PF, isoform F [Drosophila melanogaster]	gi|78706474	513388	1	89	107	871	0.00408	0.237	TRUE	S_G1.3899.3899.3.dta	cPDmRPQDSGAYScEIINTR	R	G	0.95	0	0	2.62	2	c1: Carbamidomethyl (+57.02), c14: Carbamidomethyl (+57.02), m4: Oxidation (+15.99)	796.583	2386.72	2386.02	3	1.71	716.1	1795	1814	TRUE	gi|161077537
terribly reduced optic lobes CG33950-PF, isoform F [Drosophila melanogaster]	gi|78706474	513388	1	89	107	871	0.00408	0.237	TRUE	S_G1.3887.3887.3.dta	cPDmRPQDSGAYScEIINTR	R	G	0.95	0	0	2.6	2	c1: Carbamidomethyl (+57.02), c14: Carbamidomethyl (+57.02), m4: Oxidation (+15.99)	796.882	2387.62	2386.02	3	2.609	1092	1795	1814	TRUE	gi|161077537
terribly reduced optic lobes CG33950-PF, isoform F [Drosophila melanogaster]	gi|78706474	513388	1	89	107	871	0.00408	0.237	TRUE	S_F1.3991.3991.3.dta	SSIcDGNPDcSDASDEQScSLGLK	K	C	0.95	0	0	5.92	2	c4: Carbamidomethyl (+57.02), c10: Carbamidomethyl (+57.02), c19: Carbamidomethyl (+57.02)	868.584	2602.73	2602.03	3	1.703	654.1	1633	1656	TRUE	gi|161077537
terribly reduced optic lobes CG33950-PF, isoform F [Drosophila melanogaster]	gi|78706474	513388	1	89	107	871	0.00408	0.237	TRUE	S_G2.6576.6576.3.dta	GVYScVAENDHGSDLSSTSIDIEPR	R	E	0.95	0	0	4.24	2	c5: Carbamidomethyl (+57.02)	903.919	2708.73	2708.21	3	1.531	565.1	3217	3241	TRUE	gi|161077537
terribly reduced optic lobes CG33950-PF, isoform F [Drosophila melanogaster]	gi|78706474	513388	1	89	107	871	0.00408	0.237	TRUE	S_G3.2949.2949.3.dta	cDGENDcGDNSDETScDPEPSGAPcR	R	Y	0.95	0	0	2.85	2	c1: Carbamidomethyl (+57.02), c7: Carbamidomethyl (+57.02), c16: Carbamidomethyl (+57.02), c25: Carbamidomethyl (+57.02), c1: Pyro-cmC (-17.03)	962.175	2883.5	2883.97	3	0.5416	187.8	1676	1701	TRUE	gi|161077537
terribly reduced optic lobes CG33950-PF, isoform F [Drosophila melanogaster]	gi|78706474	513388	1	89	107	871	0.00408	0.237	TRUE	S_F2.2868.2868.3.dta	cDGENDcGDNSDETScDPEPSGAPcR	R	Y	0.95	0	0	5.66	2	c1: Carbamidomethyl (+57.02), c7: Carbamidomethyl (+57.02), c16: Carbamidomethyl (+57.02), c25: Carbamidomethyl (+57.02), c1: Pyro-cmC (-17.03)	962.28	2883.82	2883.97	3	0.8566	296.9	1676	1701	TRUE	gi|161077537
terribly reduced optic lobes CG33950-PF, isoform F [Drosophila melanogaster]	gi|78706474	513388	1	89	107	871	0.00408	0.237	TRUE	S_F1.2793.2793.3.dta	cDGENDcGDNSDETScDPEPSGAPcR	R	Y	0.95	0	0	3.18	2	c1: Carbamidomethyl (+57.02), c7: Carbamidomethyl (+57.02), c16: Carbamidomethyl (+57.02), c25: Carbamidomethyl (+57.02), c1: Pyro-cmC (-17.03)	962.328	2883.96	2883.97	3	0.9997	346.5	1676	1701	TRUE	gi|161077537
terribly reduced optic lobes CG33950-PF, isoform F [Drosophila melanogaster]	gi|78706474	513388	1	89	107	871	0.00408	0.237	TRUE	S_F2.2879.2879.3.dta	cDGENDcGDNSDETScDPEPSGAPcR	R	Y	0.95	0	0	5.62	2	c1: Carbamidomethyl (+57.02), c7: Carbamidomethyl (+57.02), c16: Carbamidomethyl (+57.02), c25: Carbamidomethyl (+57.02), c1: Pyro-cmC (-17.03)	962.623	2884.85	2883.97	3	1.887	653.8	1676	1701	TRUE	gi|161077537
terribly reduced optic lobes CG33950-PF, isoform F [Drosophila melanogaster]	gi|78706474	513388	1	89	107	871	0.00408	0.237	TRUE	ScaffoldIDNumber_217701_S_F1.1912.1912.3.dta	cDGENDcGDNSDETScDPEPSGAPcR	R	Y	0.95	0	0	6.19	2	c1: Carbamidomethyl (+57.02), c7: Carbamidomethyl (+57.02), c16: Carbamidomethyl (+57.02), c25: Carbamidomethyl (+57.02)	968.283	2901.82	2900.99	3	1.837	633	1676	1701	TRUE	gi|161077537
terribly reduced optic lobes CG33950-PF, isoform F [Drosophila melanogaster]	gi|78706474	513388	1	89	107	871	0.00408	0.237	TRUE	S_G2.2093.2093.2.dta	cDGENDcGDNSDETScDPEPSGAPcR	R	Y	0.95	0	0	5.47	2	c1: Carbamidomethyl (+57.02), c7: Carbamidomethyl (+57.02), c16: Carbamidomethyl (+57.02), c25: Carbamidomethyl (+57.02)	968.289	1934.56	2900.99	2	-965.4	-498800	1676	1701	TRUE	gi|161077537
terribly reduced optic lobes CG33950-PF, isoform F [Drosophila melanogaster]	gi|78706474	513388	1	89	107	871	0.00408	0.237	TRUE	S_G3.2200.2200.3.dta	cDGENDcGDNSDETScDPEPSGAPcR	R	Y	0.95	0	0	3.05	2	c1: Carbamidomethyl (+57.02), c7: Carbamidomethyl (+57.02), c16: Carbamidomethyl (+57.02), c25: Carbamidomethyl (+57.02)	968.295	2901.86	2900.99	3	1.874	645.5	1676	1701	TRUE	gi|161077537
terribly reduced optic lobes CG33950-PF, isoform F [Drosophila melanogaster]	gi|78706474	513388	1	89	107	871	0.00408	0.237	TRUE	S_F1.1921.1921.3.dta	cDGENDcGDNSDETScDPEPSGAPcR	R	Y	0.95	0	0	6.4	2	c1: Carbamidomethyl (+57.02), c7: Carbamidomethyl (+57.02), c16: Carbamidomethyl (+57.02), c25: Carbamidomethyl (+57.02)	968.32	2901.94	2900.99	3	1.95	671.7	1676	1701	TRUE	gi|161077537
terribly reduced optic lobes CG33950-PF, isoform F [Drosophila melanogaster]	gi|78706474	513388	1	89	107	871	0.00408	0.237	TRUE	S_G1.1928.1928.3.dta	cDGENDcGDNSDETScDPEPSGAPcR	R	Y	0.95	0	0	4.59	2	c1: Carbamidomethyl (+57.02), c7: Carbamidomethyl (+57.02), c16: Carbamidomethyl (+57.02), c25: Carbamidomethyl (+57.02)	968.337	2901.99	2900.99	3	2	688.9	1676	1701	TRUE	gi|161077537
terribly reduced optic lobes CG33950-PF, isoform F [Drosophila melanogaster]	gi|78706474	513388	1	89	107	871	0.00408	0.237	TRUE	S_F2.2031.2031.2.dta	cDGENDcGDNSDETScDPEPSGAPcR	R	Y	0.95	0	0	3.68	2	c1: Carbamidomethyl (+57.02), c7: Carbamidomethyl (+57.02), c16: Carbamidomethyl (+57.02), c25: Carbamidomethyl (+57.02)	968.589	1935.16	2900.99	2	-964.8	-498300	1676	1701	TRUE	gi|161077537
terribly reduced optic lobes CG33950-PF, isoform F [Drosophila melanogaster]	gi|78706474	513388	1	89	107	871	0.00408	0.237	TRUE	S_F912.3723.3723.3.dta	NVIGDQcDQcRPGTYGLSAQNQDGcK	R	E	0.95	0	0	6.74	2	c7: Carbamidomethyl (+57.02), c10: Carbamidomethyl (+57.02), c25: Carbamidomethyl (+57.02)	981.601	2941.78	2941.26	3	1.526	518.4	2553	2578	TRUE	gi|161077537
terribly reduced optic lobes CG33950-PF, isoform F [Drosophila melanogaster]	gi|78706474	513388	1	89	107	871	0.00408	0.237	TRUE	S_F1.3644.3644.3.dta	NVIGDQcDQcRPGTYGLSAQNQDGcK	R	E	0.95	0	0	8.01	2	c7: Carbamidomethyl (+57.02), c10: Carbamidomethyl (+57.02), c25: Carbamidomethyl (+57.02)	981.634	2941.88	2941.26	3	1.622	551.3	2553	2578	TRUE	gi|161077537
terribly reduced optic lobes CG33950-PF, isoform F [Drosophila melanogaster]	gi|78706474	513388	1	89	107	871	0.00408	0.237	TRUE	ScaffoldIDNumber_236368_S_F2.3728.3728.3.dta	NVIGDQcDQcRPGTYGLSAQNQDGcK	R	E	0.95	0	0	6.12	2	c7: Carbamidomethyl (+57.02), c10: Carbamidomethyl (+57.02), c25: Carbamidomethyl (+57.02)	981.717	2942.13	2941.26	3	1.873	636.2	2553	2578	TRUE	gi|161077537
terribly reduced optic lobes CG33950-PF, isoform F [Drosophila melanogaster]	gi|78706474	513388	1	89	107	871	0.00408	0.237	TRUE	S_G2.3747.3747.3.dta	NVIGDQcDQcRPGTYGLSAQNQDGcK	R	E	0.95	0	0	5.77	2	c7: Carbamidomethyl (+57.02), c10: Carbamidomethyl (+57.02), c25: Carbamidomethyl (+57.02)	981.739	2942.19	2941.26	3	1.937	658.3	2553	2578	TRUE	gi|161077537
terribly reduced optic lobes CG33950-PF, isoform F [Drosophila melanogaster]	gi|78706474	513388	1	89	107	871	0.00408	0.237	TRUE	ScaffoldIDNumber_478217_S_G3.3792.3792.3.dta	NVIGDQcDQcRPGTYGLSAQNQDGcK	R	E	0.95	0	0	7.21	2	c7: Carbamidomethyl (+57.02), c10: Carbamidomethyl (+57.02), c25: Carbamidomethyl (+57.02)	981.761	2942.26	2941.26	3	2.005	681.1	2553	2578	TRUE	gi|161077537
terribly reduced optic lobes CG33950-PF, isoform F [Drosophila melanogaster]	gi|78706474	513388	1	89	107	871	0.00408	0.237	TRUE	ScaffoldIDNumber_22795_S_A11Dros.2462.2462.3.dta	NVIGDQcDQcRPGTYGLSAQNQDGcK	R	E	0.95	0	0	4.96	2	c7: Carbamidomethyl (+57.02), c10: Carbamidomethyl (+57.02), c25: Carbamidomethyl (+57.02)	982.187	2943.54	2941.26	3	3.283	1115	2553	2578	TRUE	gi|161077537
sallimus CG1915-PC, isoform C [Drosophila melanogaster]	gi|161080703	2.06604e+06	1	83	86	363	0.0017	0.0614	TRUE	S_E910.2698.2698.2.dta	SSGSVVVSDQKPDEQIKPPR	K	F	0.95	0	0	2.28	2		719.186	1436.36	2153.12	2	-715.8	-498000	6823	6842	TRUE
sallimus CG1915-PC, isoform C [Drosophila melanogaster]	gi|161080703	2.06604e+06	1	83	86	363	0.0017	0.0614	TRUE	S_F910.2252.2252.2.dta	cDGDcIVQSPSKPEKPTTPGSEK	R	A	0.95	0	0	2.74	2	c1: Carbamidomethyl (+57.02), c5: Carbamidomethyl (+57.02)	840.252	1678.49	2517.16	2	-837.7	-498800	4580	4602	TRUE
sallimus CG1915-PC, isoform C [Drosophila melanogaster]	gi|161080703	2.06604e+06	1	83	86	363	0.0017	0.0614	TRUE	S_E911.6446.6446.3.dta	TQNLENKPFVEPQYDIEEISK	K	S	0.95	0	0	2.55	2		842	2522.98	2521.25	3	2.738	1085	1135	1155	TRUE
CG32702 CG32702-PA [Drosophila melanogaster]	gi|24640838	411066	1	55	57	276	0.00129	0.175	TRUE	S_E912.5709.5709.3.dta	VLcKDDDLHNPLIQLENNK	K	G	0.95	0	0	4.04	2	c3: Carbamidomethyl (+57.02)	760.814	2279.42	2278.15	3	2.277	998.4	1243	1261	TRUE
CG32702 CG32702-PA [Drosophila melanogaster]	gi|24640838	411066	1	55	57	276	0.00129	0.175	TRUE	ScaffoldIDNumber_393240_S_F911.4307.4307.3.dta	LREDANQQYPTEGDcLNVGVK	K	I	0.95	0	0	4.14	2	c15: Carbamidomethyl (+57.02)	803.403	2407.19	2406.14	3	2.058	854.7	1656	1676	TRUE
CG32702 CG32702-PA [Drosophila melanogaster]	gi|24640838	411066	1	55	57	276	0.00129	0.175	TRUE	S_G2.4381.4381.2.dta	LREDANQQYPTEGDcLNVGVK	K	I	0.95	0	0	2.92	2	c15: Carbamidomethyl (+57.02)	803.434	1604.85	2406.14	2	-800.3	-498300	1656	1676	TRUE
Papilin CG33103-PA, isoform A [Drosophila melanogaster]	gi|28572036	312636	1	51	58	438	0.00205	0.228	TRUE	S_G2.3980.3980.3.dta	ISSSGEHTVEEDAVcLK	R	E	0.95	0	0	3.47	2	c15: Carbamidomethyl (+57.02)	621.713	1862.12	1860.87	3	2.258	1212	427	443	TRUE
Papilin CG33103-PA, isoform A [Drosophila melanogaster]	gi|28572036	312636	1	51	58	438	0.00205	0.228	TRUE	S_E912.2598.2598.3.dta	QPDPAPTVAQcSQPADPGQcDK	R	W	0.95	0	0	3.36	2	c11: Carbamidomethyl (+57.02), c20: Carbamidomethyl (+57.02)	790.417	2368.23	2367.03	3	2.202	929.3	1991	2012	TRUE
Muscle-specific protein 300 CG33715-PD, isoform D [Drosophila melanogaster]	gi|161076705	1.40526e+06	1	45	45	109	0.00051	0.0478	TRUE	ScaffoldIDNumber_9593_S_A10Dros.1907.1907.3.dta	HQLDKPEGPAAEELSK	K	V	0.95	0	0	3.14	2		584.609	1750.8	1748.88	3	2.93	1673	2480	2495	TRUE
Muscle-specific protein 300 CG33715-PD, isoform D [Drosophila melanogaster]	gi|161076705	1.40526e+06	1	45	45	109	0.00051	0.0478	TRUE	S_E911.2676.2676.3.dta	AVSSDDKIDTAPASQQmQQLNER	K	F	0.95	0	0	2.7	2	m17: Oxidation (+15.99)	850.887	2549.64	2548.2	3	2.449	960.3	1465	1487	TRUE
Laminin A CG10236-PA [Drosophila melanogaster]	gi|17136292	411103	1	44	48	274	0.00128	0.16	TRUE	S_F912.3579.3579.2.dta	ILNDGEDHVVTVQHTQGELR	R	L	0.95	0	0	3.36	2		754.557	1507.1	2260.13	2	-752	-498700	3128	3147	TRUE
alpha Spectrin CG1977-PA [Drosophila melanogaster]	gi|17136504	278289	1	40	44	127	0.000594	0.207	TRUE	S_F910.3221.3221.3.dta	HQLVEADIVAHEDR	K	I	0.95	0	0	3.48	2		545.594	1633.76	1631.81	3	2.952	1806	1648	1661	TRUE
alpha Spectrin CG1977-PA [Drosophila melanogaster]	gi|17136504	278289	1	40	44	127	0.000594	0.207	TRUE	ScaffoldIDNumber_173155_S_E911.3225.3225.3.dta	HQLVEADIVAHEDR	K	I	0.95	0	0	4.43	2		545.709	1634.1	1631.81	3	3.296	2016	1648	1661	TRUE
alpha Spectrin CG1977-PA [Drosophila melanogaster]	gi|17136504	278289	1	40	44	127	0.000594	0.207	TRUE	S_E912.2936.2936.3.dta	LIDGQHYAADDVAQR	K	R	0.95	0	0	3.25	2		558.459	1672.35	1671.81	3	1.551	927.1	536	550	TRUE
alpha Spectrin CG1977-PA [Drosophila melanogaster]	gi|17136504	278289	1	40	44	127	0.000594	0.207	TRUE	S_E912.2910.2910.3.dta	LIDGQHYAADDVAQR	K	R	0.95	0	0	2.82	2		558.591	1672.75	1671.81	3	1.948	1164	536	550	TRUE
alpha Spectrin CG1977-PA [Drosophila melanogaster]	gi|17136504	278289	1	40	44	127	0.000594	0.207	TRUE	S_A10Dros.2190.2190.3.dta	LIDGQHYAADDVAQR	K	R	0.95	0	0	2.59	2		558.795	1673.36	1671.81	3	2.561	1530	536	550	TRUE
Paramyosin CG5939-PA, isoform A [Drosophila melanogaster]	gi|24661112,gi|24661116	102322	1	39	51	578	0.0027	0.494	TRUE	S_E910.3013.3013.3.dta	LENERDELTAAYK	R	E	0.95	0	0	3.57	2		518.624	1552.85	1551.77	3	2.09	1345	462	474	TRUE
Paramyosin CG5939-PA, isoform A [Drosophila melanogaster]	gi|24661112,gi|24661116	102322	1	39	51	578	0.0027	0.494	TRUE	S_F1.2614.2614.3.dta	LEEAEGGAEHQFEANR	R	K	0.95	0	0	2.66	2		597.204	1788.59	1786.8	3	2.797	1563	79	94	TRUE
Paramyosin CG5939-PA, isoform A [Drosophila melanogaster]	gi|24661112,gi|24661116	102322	1	39	51	578	0.0027	0.494	TRUE	A9.1518.1518.3.dta	LEEAEGGAEHQFEANR	R	K	0.95	0	0	2.7	2		597.314	1788.92	1786.8	3	3.128	1747	79	94	TRUE
zormin CG33484-PD, isoform D [Drosophila melanogaster]	gi|116007762	411353	1	35	37	226	0.00106	0.131	TRUE	S_E8.2977.2977.2.dta	GSGLPASSDVQTVSQEHNTESSR	R	V	0.95	0	0	2.82	2		792.228	1582.44	2373.09	2	-789.6	-498700	2004	2026	TRUE
zormin CG33484-PD, isoform D [Drosophila melanogaster]	gi|116007762	411353	1	35	37	226	0.00106	0.131	TRUE	S_F1.3014.3014.3.dta	GSGLPASSDVQTVSQEHNTESSR	R	V	0.95	0	0	2.64	2		792.715	2375.12	2373.09	3	3.037	1278	2004	2026	TRUE
Calcium ATPase at 60A CG3725-PA, isoform A [Drosophila melanogaster]	gi|17136664,gi|24762445,gi|24762447,gi|24762449,gi|24762451,gi|24762453,gi|24762455,gi|24762457	109596	1	34	42	581	0.00272	0.346	TRUE	S_E912.3193.3193.3.dta	TEmSETEEIKTPLQQK	R	L	0.95	0	0	2.92	2	m3: Oxidation (+15.99)	637.154	1908.44	1907.93	3	1.519	795.5	237	252	TRUE
Calcium ATPase at 60A CG3725-PA, isoform A [Drosophila melanogaster]	gi|17136664,gi|24762445,gi|24762447,gi|24762449,gi|24762451,gi|24762453,gi|24762455,gi|24762457	109596	1	34	42	581	0.00272	0.346	TRUE	S_E911.6640.6640.3.dta	cLALAVADSPMKPDEMDLGDSTK	R	F	0.95	0	0	5.37	2	c1: Carbamidomethyl (+57.02)	822.772	2465.29	2464.14	3	2.158	875.1	561	583	TRUE
Calcium ATPase at 60A CG3725-PA, isoform A [Drosophila melanogaster]	gi|17136664,gi|24762445,gi|24762447,gi|24762449,gi|24762451,gi|24762453,gi|24762455,gi|24762457	109596	1	34	42	581	0.00272	0.346	TRUE	S_E911.6829.6829.3.dta	cLALAVADSPmKPDEmDLGDSTK	R	F	0.95	0	0	5.1	2	c1: Carbamidomethyl (+57.02), m11: Oxidation (+15.99), m16: Oxidation (+15.99), c1: Pyro-cmC (-17.03)	827.908	2480.7	2479.1	3	2.603	1049	561	583	TRUE
Calcium ATPase at 60A CG3725-PA, isoform A [Drosophila melanogaster]	gi|17136664,gi|24762445,gi|24762447,gi|24762449,gi|24762451,gi|24762453,gi|24762455,gi|24762457	109596	1	34	42	581	0.00272	0.346	TRUE	S_F8.4778.4778.3.dta	cLALAVADSPmKPDEmDLGDSTK	R	F	0.95	0	0	2.85	2	c1: Carbamidomethyl (+57.02), m11: Oxidation (+15.99), m16: Oxidation (+15.99)	833.31	2496.91	2496.13	3	1.783	713.9	561	583	TRUE
Calcium ATPase at 60A CG3725-PA, isoform A [Drosophila melanogaster]	gi|17136664,gi|24762445,gi|24762447,gi|24762449,gi|24762451,gi|24762453,gi|24762455,gi|24762457	109596	1	34	42	581	0.00272	0.346	TRUE	S_E912.4827.4827.3.dta	cLALAVADSPmKPDEmDLGDSTK	R	F	0.95	0	0	3.48	2	c1: Carbamidomethyl (+57.02), m11: Oxidation (+15.99), m16: Oxidation (+15.99)	833.738	2498.19	2496.13	3	3.066	1227	561	583	TRUE
alpha actinin CG4376-PC, isoform C [Drosophila melanogaster]	gi|17137758	106358	1	31	34	241	0.00113	0.381	TRUE	S_A9Dros.1975.1975.3.dta	HEAFESDLAAHQDR	K	V	0.95	0	0	3.21	2		543.29	1626.85	1625.73	3	2.124	1305	462	475	TRUE
rhea CG6831-PA [Drosophila melanogaster]	gi|21355751	306972	1	28	28	106	0.000496	0.146	TRUE	S_F912.6100.6100.3.dta	SVHGVAATTQNPAIIDcADDVVTSSAR	R	L	0.95	0	0	6.18	2	c17: Carbamidomethyl (+57.02)	920.011	2757.01	2755.33	3	2.684	973.3	1152	1178	TRUE
CG4389 CG4389-PB, isoform B [Drosophila melanogaster]	gi|24583077,gi|24583079	79622	1	27	31	210	0.000983	0.423	TRUE	S_E911.6140.6140.3.dta	ELEAVVPEHcVIATNTSAIPITK	K	I	0.95	0	0	3.57	2	c10: Carbamidomethyl (+57.02)	832.285	2493.83	2492.31	3	2.533	1015	434	456	TRUE
Aconitase CG9244-PB, isoform B [Drosophila melanogaster]	gi|17864292	85383.5	1	27	37	473	0.00221	0.417	TRUE	S_E911.6833.6833.2.dta	LDFNPLTDELTGADGKK	R	F	0.95	0	0	2.39	2		612.691	1223.37	1833.92	2	-609.5	-497800	513	529	TRUE
Aconitase CG9244-PB, isoform B [Drosophila melanogaster]	gi|17864292	85383.5	1	27	37	473	0.00221	0.417	TRUE	S_F912.7554.7554.2.dta	NDANPATHcFVTSPELVTALSIAGR	R	L	0.95	0	0	4.72	2	c9: Carbamidomethyl (+57.02)	881.64	1761.26	2641.3	2	-879	-498800	488	512	TRUE
Cytochrome P450-4g1 CG3972-PA [Drosophila melanogaster]	gi|17933498	62954.7	1	24	31	601	0.00281	0.39	TRUE	ScaffoldIDNumber_229906_A9.3609.3609.3.dta	SFVPTFVDHSK	K	A	0.95	0	0	2.44	2		422.711	1265.11	1263.64	3	2.479	1958	166	176	TRUE
Cytochrome P450-4g1 CG3972-PA [Drosophila melanogaster]	gi|17933498	62954.7	1	24	31	601	0.00281	0.39	TRUE	S_A11Dros.2434.2434.3.dta	NYIVHSTDTEADFK	R	L	0.95	0	0	2.48	2		547.936	1640.78	1639.76	3	2.031	1237	517	530	TRUE
Cytochrome P450-4g1 CG3972-PA [Drosophila melanogaster]	gi|17933498	62954.7	1	24	31	601	0.00281	0.39	TRUE	S_A8Dros.2448.2448.3.dta	NYIVHSTDTEADFK	R	L	0.95	0	0	3.14	2		548.147	1641.42	1639.76	3	2.664	1622	517	530	TRUE
Cytochrome P450-4g1 CG3972-PA [Drosophila melanogaster]	gi|17933498	62954.7	1	24	31	601	0.00281	0.39	TRUE	S_A10Dros.2455.2455.3.dta	NYIVHSTDTEADFK	R	L	0.95	0	0	3.52	2		548.234	1641.68	1639.76	3	2.925	1781	517	530	TRUE
Cytochrome P450-4g1 CG3972-PA [Drosophila melanogaster]	gi|17933498	62954.7	1	24	31	601	0.00281	0.39	TRUE	S_E912.4207.4207.3.dta	KEGLRDDLDDIDENDVGAK	K	R	0.95	0	0	2.55	2		706.878	2117.61	2117	3	1.619	764.2	303	321	TRUE
Cytochrome P450-4g1 CG3972-PA [Drosophila melanogaster]	gi|17933498	62954.7	1	24	31	601	0.00281	0.39	TRUE	S_E910.3973.3973.3.dta	KEGLRDDLDDIDENDVGAK	K	R	0.95	0	0	3.7	2		706.974	2117.9	2117	3	1.907	900	303	321	TRUE
Cytochrome P450-4g1 CG3972-PA [Drosophila melanogaster]	gi|17933498	62954.7	1	24	31	601	0.00281	0.39	TRUE	ScaffoldIDNumber_198775_S_E912.4203.4203.3.dta	KEGLRDDLDDIDENDVGAK	K	R	0.95	0	0	3.66	2		707.079	2118.21	2117	3	2.22	1048	303	321	TRUE
Cytochrome P450-4g1 CG3972-PA [Drosophila melanogaster]	gi|17933498	62954.7	1	24	31	601	0.00281	0.39	TRUE	S_E9.4155.4155.3.dta	KEGLRDDLDDIDENDVGAK	K	R	0.95	0	0	3.12	2		707.188	2118.54	2117	3	2.549	1203	303	321	TRUE
Laminin B1 CG7123-PA, isoform A [Drosophila melanogaster]	gi|17136294,gi|24582614	198314	1	23	25	131	0.000613	0.163	TRUE	S_G1.4397.4397.3.dta	cPETVASGLAHADGcSLDTR	R	N	0.95	0	0	5.04	2	c1: Carbamidomethyl (+57.02), c15: Carbamidomethyl (+57.02)	707.024	2118.05	2116.94	3	2.116	998.5	935	954	TRUE
Tropomyosin 1 CG4898-PD, isoform D [Drosophila melanogaster]	gi|24647073,gi|24647075,gi|24647077	32728.2	1	22	29	116	0.000543	0.551	TRUE	S_E8.7634.7634.3.dta	KIQTVENELDQTQEALTLVTGK	K	L	0.95	0	0	4.15	2		820.809	2459.4	2458.3	3	2.108	856.9	49	70	TRUE	gi|45553375
Tropomyosin 1 CG4898-PD, isoform D [Drosophila melanogaster]	gi|24647073,gi|24647075,gi|24647077	32728.2	1	22	29	116	0.000543	0.551	TRUE	ScaffoldIDNumber_110043_S_E8.7645.7645.3.dta	KIQTVENELDQTQEALTLVTGK	K	L	0.95	0	0	2.89	2		821.234	2460.68	2458.3	3	3.383	1374	49	70	TRUE	gi|45553375
CG3523 CG3523-PA [Drosophila melanogaster]	gi|19920632	266429	1	22	22	105	0.000491	0.121	TRUE	S_E912.4542.4542.3.dta	AMDGGADVKPAAAAPAAAAGVPEANITSGGSSR	K	T	0.95	0	0	6.31	2		980.779	2939.31	2938.43	3	1.887	641.9	2114	2146	TRUE
CG3523 CG3523-PA [Drosophila melanogaster]	gi|19920632	266429	1	22	22	105	0.000491	0.121	TRUE	S_F910.4516.4516.3.dta	AMDGGADVKPAAAAPAAAAGVPEANITSGGSSR	K	T	0.95	0	0	3.89	2		980.839	2939.49	2938.43	3	2.068	703.4	2114	2146	TRUE
CG11198 CG11198-PC, isoform C [Drosophila melanogaster]	gi|161076407,gi|161076409,gi|24586458,gi|24586460	261907	1	20	20	52	0.000243	0.116	TRUE	S_E911.5666.5666.3.dta	ITSENPDEGFKPSSGTVQELNFR	R	S	0.95	0	0	4.52	2		852.463	2554.37	2552.23	3	3.147	1232	488	510	TRUE
Tiggrin CG11527-PA [Drosophila melanogaster]	gi|17136984	257427	1	20	20	36	0.000168	0.107	TRUE	S_G1.4575.4575.2.dta	LVYDHQQPFGQSTIPR	K	D	0.95	0	0	2.6	2		629.913	1257.81	1885.96	2	-627.1	-498200	307	322	TRUE
Arginine kinase CG32031-PA, isoform A [Drosophila melanogaster]	gi|24661336,gi|24661340	61247.2	1	19	24	143	0.000669	0.386	TRUE	ScaffoldIDNumber_110757_S_E8.6713.6713.3.dta	HPASNFGDVSTFGNVDPTNEYVISTR	K	V	0.95	0	0	9.24	2		942.743	2825.21	2824.32	3	1.897	671.1	305	330	TRUE
Neural conserved at 73EF CG11661-PI, isoform I [Drosophila melanogaster]	gi|161084461	122879	1	19	20	218	0.00102	0.219	TRUE	ScaffoldIDNumber_436215_S_G1.5456.5456.3.dta	LAVVANPSHLEAVDPVVQGK	R	T	0.95	0	0	5.89	2		682.28	2043.82	2043.12	3	1.701	831.7	362	381	TRUE
Neural conserved at 73EF CG11661-PI, isoform I [Drosophila melanogaster]	gi|161084461	122879	1	19	20	218	0.00102	0.219	TRUE	S_G3.5603.5603.3.dta	LAVVANPSHLEAVDPVVQGK	R	T	0.95	0	0	3.7	2		682.286	2043.83	2043.12	3	1.718	840	362	381	TRUE
Neural conserved at 73EF CG11661-PI, isoform I [Drosophila melanogaster]	gi|161084461	122879	1	19	20	218	0.00102	0.219	TRUE	ScaffoldIDNumber_176230_S_E911.5546.5546.3.dta	LAVVANPSHLEAVDPVVQGK	R	T	0.95	0	0	6.74	2		682.699	2045.07	2043.12	3	2.959	1446	362	381	TRUE
Neural conserved at 73EF CG11661-PI, isoform I [Drosophila melanogaster]	gi|161084461	122879	1	19	20	218	0.00102	0.219	TRUE	S_E911.5517.5517.2.dta	LAVVANPSHLEAVDPVVQGK	R	T	0.95	0	0	3.24	2		682.739	1363.46	2043.12	2	-678.7	-497400	362	381	TRUE
Neural conserved at 73EF CG11661-PI, isoform I [Drosophila melanogaster]	gi|161084461	122879	1	19	20	218	0.00102	0.219	TRUE	ScaffoldIDNumber_176233_S_E911.5537.5537.3.dta	LAVVANPSHLEAVDPVVQGK	R	T	0.95	0	0	7.1	2		682.759	2045.25	2043.12	3	3.137	1533	362	381	TRUE
Cytochrome P450 reductase CG11567-PA, isoform A [Drosophila melanogaster]	gi|17137192	76331.1	1	18	20	177	0.000828	0.321	TRUE	S_E912.4724.4724.3.dta	YDAGDHVAMFPVNDK	R	S	0.95	0	0	3.8	2		561.136	1680.38	1678.75	3	2.638	1569	318	332	TRUE
Cytochrome P450 reductase CG11567-PA, isoform A [Drosophila melanogaster]	gi|17137192	76331.1	1	18	20	177	0.000828	0.321	TRUE	S_F911.4733.4733.3.dta	YDAGDHVAMFPVNDK	R	S	0.95	0	0	2.85	2		561.168	1680.48	1678.75	3	2.735	1626	318	332	TRUE
Cytochrome P450 reductase CG11567-PA, isoform A [Drosophila melanogaster]	gi|17137192	76331.1	1	18	20	177	0.000828	0.321	TRUE	S_F912.7087.7087.3.dta	LPTKPETPIImVGPGTGLAPFR	R	G	0.95	0	0	3.92	2	m11: Oxidation (+15.99)	770.887	2309.64	2308.27	3	2.372	1027	522	543	TRUE
viking CG16858-PA [Drosophila melanogaster]	gi|17137252	193761	1	18	19	190	0.000889	0.103	TRUE	S_F2.3940.3940.2.dta	GPQGESGVVGLDGRNGQIGDQGPR	K	G	0.95	0	0	2.14	2		785.03	1568.04	2350.15	2	-781.1	-497800	1130	1153	TRUE
upheld CG7107-PF, isoform F [Drosophila melanogaster]	gi|62473664	47113.5	1	17	23	236	0.0011	0.405	TRUE	S_F910.3470.3470.2.dta	KPPQTPAEGEGDPEFIK	K	R	0.95	0	0	2.52	2		614.522	1227.03	1839.91	2	-611.9	-498300	21	37	TRUE
upheld CG7107-PF, isoform F [Drosophila melanogaster]	gi|62473664	47113.5	1	17	23	236	0.0011	0.405	TRUE	S_E910.3396.3396.3.dta	KPPQTPAEGEGDPEFIK	K	R	0.95	0	0	4.64	2		614.54	1840.6	1839.91	3	1.69	917.8	21	37	TRUE
upheld CG7107-PF, isoform F [Drosophila melanogaster]	gi|62473664	47113.5	1	17	23	236	0.0011	0.405	TRUE	S_F7.3602.3602.2.dta	KPPQTPAEGEGDPEFIK	K	R	0.95	0	0	4.02	2		614.619	1227.22	1839.91	2	-611.7	-498000	21	37	TRUE
upheld CG7107-PF, isoform F [Drosophila melanogaster]	gi|62473664	47113.5	1	17	23	236	0.0011	0.405	TRUE	A9.2330.2330.3.dta	KPPQTPAEGEGDPEFIK	K	R	0.95	0	0	3	2		614.683	1841.02	1839.91	3	2.119	1151	21	37	TRUE
upheld CG7107-PF, isoform F [Drosophila melanogaster]	gi|62473664	47113.5	1	17	23	236	0.0011	0.405	TRUE	S_F7.3590.3590.3.dta	KPPQTPAEGEGDPEFIK	K	R	0.95	0	0	4.77	2		614.873	1841.6	1839.91	3	2.69	1460	21	37	TRUE
upheld CG7107-PF, isoform F [Drosophila melanogaster]	gi|62473664	47113.5	1	17	23	236	0.0011	0.405	TRUE	S_F911.3598.3598.2.dta	KPPQTPAEGEGDPEFIK	K	R	0.95	0	0	2.92	2		614.912	1227.81	1839.91	2	-611.1	-497300	21	37	TRUE
upheld CG7107-PF, isoform F [Drosophila melanogaster]	gi|62473664	47113.5	1	17	23	236	0.0011	0.405	TRUE	S_E9.3491.3491.2.dta	KPPQTPAEGEGDPEFIK	K	R	0.95	0	0	3.2	2		615.104	1228.19	1839.91	2	-610.7	-496800	21	37	TRUE
upheld CG7107-PF, isoform F [Drosophila melanogaster]	gi|62473664	47113.5	1	17	23	236	0.0011	0.405	TRUE	S_E9.2875.2875.2.dta	KPPQTPAEGEGDPEFIKR	K	Q	0.95	0	0	5.33	2		666.551	1331.09	1996.01	2	-663.9	-498400	21	38	TRUE
upheld CG7107-PF, isoform F [Drosophila melanogaster]	gi|62473664	47113.5	1	17	23	236	0.0011	0.405	TRUE	A8.1807.1807.2.dta	KPPQTPAEGEGDPEFIKR	K	Q	0.95	0	0	3.96	2		666.63	1331.24	1996.01	2	-663.8	-498200	21	38	TRUE
upheld CG7107-PF, isoform F [Drosophila melanogaster]	gi|62473664	47113.5	1	17	23	236	0.0011	0.405	TRUE	A8.1801.1801.2.dta	KPPQTPAEGEGDPEFIKR	K	Q	0.95	0	0	2.96	2		666.656	1331.3	1996.01	2	-663.7	-498200	21	38	TRUE
upheld CG7107-PF, isoform F [Drosophila melanogaster]	gi|62473664	47113.5	1	17	23	236	0.0011	0.405	TRUE	S_E7.2952.2952.3.dta	KPPQTPAEGEGDPEFIKR	K	Q	0.95	0	0	4.01	2		667.021	1998.04	1996.01	3	3.033	1517	21	38	TRUE
upheld CG7107-PF, isoform F [Drosophila melanogaster]	gi|62473664	47113.5	1	17	23	236	0.0011	0.405	TRUE	ScaffoldIDNumber_84671_S_E7.2934.2934.3.dta	KPPQTPAEGEGDPEFIKR	K	Q	0.95	0	0	3.43	2		667.073	1998.2	1996.01	3	3.189	1595	21	38	TRUE
ATP synthase-beta CG11154-PA, isoform A [Drosophila melanogaster]	gi|24638766	54091	1	17	26	585	0.00274	0.457	TRUE	S_E9.5694.5694.3.dta	LVLEVAQHLGENTVR	R	T	0.95	0	0	2.85	2		560.585	1678.73	1677.93	3	1.812	1078	72	86	TRUE
ATP synthase-beta CG11154-PA, isoform A [Drosophila melanogaster]	gi|24638766	54091	1	17	26	585	0.00274	0.457	TRUE	S_E9.5737.5737.3.dta	LVLEVAQHLGENTVR	R	T	0.95	0	0	3.64	2		560.704	1679.09	1677.93	3	2.169	1291	72	86	TRUE
ATP synthase-beta CG11154-PA, isoform A [Drosophila melanogaster]	gi|24638766	54091	1	17	26	585	0.00274	0.457	TRUE	ScaffoldIDNumber_64886_S_E6.4708.4708.3.dta	IPSAVGYQPTLATDmGSmQER	R	I	0.95	0	0	4.82	2	m15: Oxidation (+15.99), m18: Oxidation (+15.99)	762.917	2285.73	2284.06	3	2.675	1170	302	322	TRUE
ATP synthase-beta CG11154-PA, isoform A [Drosophila melanogaster]	gi|24638766	54091	1	17	26	585	0.00274	0.457	TRUE	A8.3417.3417.3.dta	IPSAVGYQPTLATDmGSmQER	R	I	0.95	0	0	3.82	2	m15: Oxidation (+15.99), m18: Oxidation (+15.99)	762.939	2285.79	2284.06	3	2.743	1200	302	322	TRUE
CG3415 CG3415-PA [Drosophila melanogaster]	gi|18859837	64056.3	1	16	18	76	0.000356	0.328	TRUE	S_F911.4918.4918.2.dta	KDPIAGVVPLQPAPNR	K	Q	0.95	0	0	2.49	2		558.694	1115.37	1671.95	2	-555.6	-497700	458	473	TRUE
Glutactin CG9280-PA, isoform A [Drosophila melanogaster]	gi|17137794,gi|24582896,gi|24582898	118731	1	15	16	148	0.000692	0.191	TRUE	ScaffoldIDNumber_435856_S_G1.2470.2470.3.dta	LREEQEEQEKLEEER	K	Y	0.95	0	0	2.72	2		659.243	1974.7	1973.94	3	1.771	896.4	991	1005	TRUE
Glutactin CG9280-PA, isoform A [Drosophila melanogaster]	gi|17137794,gi|24582896,gi|24582898	118731	1	15	16	148	0.000692	0.191	TRUE	ScaffoldIDNumber_178373_S_E911.2306.2306.3.dta	DQVEQEREEQPDEDQGEEYER	R	S	0.95	0	0	5.17	2		880.283	2637.82	2637.08	3	1.75	663.2	940	960	TRUE
Glutactin CG9280-PA, isoform A [Drosophila melanogaster]	gi|17137794,gi|24582896,gi|24582898	118731	1	15	16	148	0.000692	0.191	TRUE	S_F1.2388.2388.3.dta	DQVEQEREEQPDEDQGEEYER	R	S	0.95	0	0	2.85	2		880.29	2637.85	2637.08	3	1.772	671.4	940	960	TRUE
Glutactin CG9280-PA, isoform A [Drosophila melanogaster]	gi|17137794,gi|24582896,gi|24582898	118731	1	15	16	148	0.000692	0.191	TRUE	S_E7.2402.2402.3.dta	DQVEQEREEQPDEDQGEEYER	R	S	0.95	0	0	2.85	2		880.572	2638.69	2637.08	3	2.619	992	940	960	TRUE
Glutactin CG9280-PA, isoform A [Drosophila melanogaster]	gi|17137794,gi|24582896,gi|24582898	118731	1	15	16	148	0.000692	0.191	TRUE	S_E7.2389.2389.3.dta	DQVEQEREEQPDEDQGEEYER	R	S	0.95	0	0	3.8	2		880.653	2638.94	2637.08	3	2.862	1084	940	960	TRUE
Glutactin CG9280-PA, isoform A [Drosophila melanogaster]	gi|17137794,gi|24582896,gi|24582898	118731	1	15	16	148	0.000692	0.191	TRUE	S_E8.2392.2392.3.dta	DQVEQEREEQPDEDQGEEYER	R	S	0.95	0	0	3.02	2		880.778	2639.31	2637.08	3	3.235	1225	940	960	TRUE
CG3731 CG3731-PB, isoform B [Drosophila melanogaster]	gi|21357875,gi|24646943	51856.2	1	15	19	116	0.000543	0.409	TRUE	S_E9.5854.5855.3.dta	ASAEDNLcHSFQSFNTcYK	R	D	0.95	0	0	3.77	2	c8: Carbamidomethyl (+57.02), c17: Carbamidomethyl (+57.02)	761.035	2280.08	2278.95	3	2.139	937.5	321	339	TRUE
pericardin CG5700-PB [Drosophila melanogaster]	gi|24663043	163475	1	14	18	215	0.00101	0.114	TRUE	S_F912.2922.2922.2.dta	ASSQSGGIIQQSQSEVHANDK	K	G	0.95	0	0	2.54	2		725.145	1448.27	2171.03	2	-721.8	-498000	1336	1356	TRUE
NADH:ubiquinone reductase 75kD subunit precursor CG2286-PA, isoform A [Drosophila melanogaster]	gi|24640557,gi|24640559	78613	1	14	17	68	0.000318	0.274	TRUE	S_E911.6788.6788.3.dta	ALSEVVGKPLPYDNLDELR	R	N	0.95	0	0	2.82	2		710.705	2129.09	2128.13	3	1.97	924.9	631	649	TRUE
aralar1 CG2139-PC, isoform C [Drosophila melanogaster]	gi|24651387,gi|24651389,gi|24651391,gi|45552009	76738	1	14	15	61	0.000285	0.226	TRUE	S_E911.5712.5712.3.dta	IDYSDLSNIAPEHYTK	R	H	0.95	0	0	3.74	2		623.363	1867.07	1865.89	3	2.182	1168	300	315	TRUE
CG9090 CG9090-PA [Drosophila melanogaster]	gi|24656137	40535.9	1	13	16	119	0.000557	0.299	TRUE	S_A6Dros.2389.2389.3.dta	mPRPPPPEMPESLK	R	K	0.95	0	0	2.92	2	m1: Oxidation (+15.99)	541.868	1622.58	1621.81	3	1.781	1097	352	365	TRUE
CG9090 CG9090-PA [Drosophila melanogaster]	gi|24656137	40535.9	1	13	16	119	0.000557	0.299	TRUE	ScaffoldIDNumber_82164_S_E7.3494.3494.3.dta	mPRPPPPEMPESLK	R	K	0.95	0	0	4	2	m1: Oxidation (+15.99)	541.92	1622.74	1621.81	3	1.935	1192	352	365	TRUE
CG9090 CG9090-PA [Drosophila melanogaster]	gi|24656137	40535.9	1	13	16	119	0.000557	0.299	TRUE	S_E7.3485.3485.3.dta	mPRPPPPEMPESLK	R	K	0.95	0	0	3.27	2	m1: Oxidation (+15.99)	542.05	1623.13	1621.81	3	2.326	1432	352	365	TRUE
CG9090 CG9090-PA [Drosophila melanogaster]	gi|24656137	40535.9	1	13	16	119	0.000557	0.299	TRUE	S_E8.3083.3083.2.dta	MPRPPPPEmPESLK	R	K	0.95	0	0	2.14	2	m9: Oxidation (+15.99)	542.09	1082.16	1621.81	2	-538.6	-497300	352	365	TRUE
Glycoprotein 93 CG5520-PA [Drosophila melanogaster]	gi|21357739	90224	1	12	15	116	0.000543	0.196	TRUE	S_F912.3179.3179.3.dta	SEDDVEDEDAKVEEAEDEKPK	K	T	0.95	0	0	3.08	2		803.748	2408.22	2406.03	3	3.195	1326	302	322	TRUE
CG7470 CG7470-PA [Drosophila melanogaster]	gi|21357643	84075.9	1	12	16	101	0.000473	0.21	TRUE	S_E912.5876.5876.3.dta	EALATVGAEHAVSLVSTR	K	E	0.95	0	0	2.77	2		605.198	1812.57	1810.97	3	2.611	1440	508	525	TRUE
CG7470 CG7470-PA [Drosophila melanogaster]	gi|21357643	84075.9	1	12	16	101	0.000473	0.21	TRUE	S_G1.4203.4203.3.dta	LMHTYTSDDSNSIEFGK	K	K	0.95	0	0	2.55	2		649.946	1946.81	1944.87	3	2.957	1518	270	286	TRUE
Glutamate oxaloacetate transaminase 2 CG4233-PC, isoform C [Drosophila melanogaster]	gi|19920542	43678.5	1	12	16	88	0.000412	0.372	TRUE	ScaffoldIDNumber_368034_S_F910.6383.6383.3.dta	TFEADGHDFcLAQSFAK	R	N	0.95	0	0	3.48	2	c10: Carbamidomethyl (+57.02)	649.213	1944.62	1943.86	3	1.764	906.5	226	242	TRUE
porin CG6647-PA, isoform A [Drosophila melanogaster]	gi|17136632,gi|19550069,gi|85724932	30532.8	1	12	17	129	0.000604	0.44	TRUE	A6.1394.1394.3.dta	TSSGIEFNTAGHSNQESGK	K	V	0.95	0	0	2.68	2		651.941	1952.8	1950.88	3	2.929	1499	34	52	TRUE
knockdown CG3861-PB, isoform B [Drosophila melanogaster]	gi|24640124,gi|24640126	58199.5	1	12	15	71	0.000332	0.272	TRUE	S_E9.3523.3523.3.dta	SGQVVPGYGHAVLR	K	K	0.95	0	0	2.89	2		481.164	1440.47	1439.78	3	1.701	1180	397	410	TRUE
lethal (1) G0334 CG7010-PC, isoform C [Drosophila melanogaster]	gi|24639740,gi|24639744,gi|28571106	48858.9	1	11	11	33	0.000154	0.242	TRUE	S_E8.4526.4526.3.dta	GFcHLYSGQEAcAVGMK	R	A	0.95	0	0	3.27	2	c3: Carbamidomethyl (+57.02), c12: Carbamidomethyl (+57.02)	639.708	1916.1	1914.83	3	2.278	1188	137	153	TRUE
Myosin light chain 2 CG2184-PA, isoform A [Drosophila melanogaster]	gi|17933672	23697.5	1	11	15	196	0.000917	0.518	TRUE	S_F8.6543.6543.3.dta	mATSGANDEDEVVIAAFK	R	T	0.95	0	0	5.1	2	m1: Oxidation (+15.99)	629.429	1885.26	1883.87	3	2.402	1273	140	157	TRUE
Myosin light chain 2 CG2184-PA, isoform A [Drosophila melanogaster]	gi|17933672	23697.5	1	11	15	196	0.000917	0.518	TRUE	S_F8.6547.6547.3.dta	mATSGANDEDEVVIAAFK	R	T	0.95	0	0	3.01	2	m1: Oxidation (+15.99)	629.612	1885.81	1883.87	3	2.949	1563	140	157	TRUE
CG10097 CG10097-PB, isoform B [Drosophila melanogaster]	gi|78706758	56986.7	1	11	14	80	0.000374	0.271	TRUE	S_E9.4911.4911.2.dta	MTPISGDccAPDLGISETDRR	K	I	0.95	0	0	2.77	2	c8: Carbamidomethyl (+57.02), c9: Carbamidomethyl (+57.02)	785.358	1568.7	2351.04	2	-781.3	-497800	79	99	TRUE
CG7920 CG7920-PA, isoform A [Drosophila melanogaster]	gi|21358615	51836.5	1	10	12	100	0.000468	0.262	TRUE	ScaffoldIDNumber_131845_S_E9.7999.7999.3.dta	SGDTVFAGGAAATPVALLNAMAK	K	H	0.95	0	0	6.96	2		712.736	2135.19	2133.1	3	3.092	1447	60	82	TRUE
CG9297 CG9297-PA, isoform A [Drosophila melanogaster]	gi|28571703,gi|28571705	103748	1	10	11	40	0.000187	0.152	TRUE	ScaffoldIDNumber_393989_S_F911.3149.3149.3.dta	INHEDEDLDGDGVKNDEDEDLDGDGK	K	V	0.95	0	0	3.35	2		954.077	2859.21	2858.17	3	2.042	714.1	205	230	TRUE
Oligomycin sensitivity-conferring protein CG4307-PA, isoform A [Drosophila melanogaster]	gi|24647054	22405.2	1	10	13	64	0.000299	0.455	TRUE	S_E6.4560.4560.3.dta	GEVVcEVVTAKPLDASQSK	R	Q	0.95	0	0	3.39	2	c5: Carbamidomethyl (+57.02)	673.925	2018.75	2017.03	3	2.731	1352	133	151	TRUE
Oligomycin sensitivity-conferring protein CG4307-PA, isoform A [Drosophila melanogaster]	gi|24647054	22405.2	1	10	13	64	0.000299	0.455	TRUE	S_F8.4544.4544.3.dta	GEVVcEVVTAKPLDASQSK	R	Q	0.95	0	0	2.85	2	c5: Carbamidomethyl (+57.02)	674.122	2019.34	2017.03	3	3.322	1644	133	151	TRUE
wings up A CG7178-PA, isoform A [Drosophila melanogaster]	gi|24642961	24472.4	1	9	11	39	0.000182	0.337	TRUE	S_E7.5044.5044.3.dta	LEDQKYDLEYVVK	K	R	0.95	0	0	2.64	2		548.687	1643.04	1641.84	3	2.209	1343	106	118	TRUE
wings up A CG7178-PA, isoform A [Drosophila melanogaster]	gi|24642961	24472.4	1	9	11	39	0.000182	0.337	TRUE	S_E7.5037.5037.3.dta	LEDQKYDLEYVVK	K	R	0.95	0	0	3.18	2		549.044	1644.11	1641.84	3	3.28	1994	106	118	TRUE
Mitochondrial phosphate carrier protein CG4994-PA, isoform A [Drosophila melanogaster]	gi|24664191,gi|24664195	38832.9	1	8	12	46	0.000215	0.32	TRUE	A7.2754.2754.3.dta	QIAAAATPVANQQDScEFGSTK	R	Y	0.95	0	0	5.82	2	c16: Carbamidomethyl (+57.02)	766.313	2295.91	2294.07	3	2.85	1241	39	60	TRUE
Collagen type IV CG4145-PA, isoform A [Drosophila melanogaster]	gi|24581820,gi|24581822,gi|24581824	174285	1	8	9	103	0.000482	0.0585	TRUE	S_G1.6770.6770.3.dta	FPIDDSYDIVDSAGVAR	K	G	0.95	0	0	3.25	2		614.738	1841.19	1839.88	3	2.321	1260	49	65	TRUE
CG13091 CG13091-PA [Drosophila melanogaster]	gi|19920962	59459.3	1	8	8	37	0.000173	0.205	TRUE	ScaffoldIDNumber_369685_S_F910.5353.5353.3.dta	LVTPISGDcSEPGLGLSDGDRR	K	M	0.95	0	0	2.68	2	c9: Carbamidomethyl (+57.02)	768.328	2301.96	2301.11	3	1.853	804.4	78	99	TRUE
fondue CG15825-PB, isoform B [Drosophila melanogaster]	gi|20129625	58012.6	1	7	9	86	0.000402	0.153	TRUE	S_F912.3586.3586.3.dta	KVTTTASAPQLVQPVASSR	R	L	0.95	0	0	3.39	2		648.27	1941.79	1941.08	3	1.718	884.5	287	305	TRUE
fondue CG15825-PB, isoform B [Drosophila melanogaster]	gi|20129625	58012.6	1	7	9	86	0.000402	0.153	TRUE	S_E7.3444.3444.3.dta	KVTTTASAPQLVQPVASSR	R	L	0.95	0	0	3.32	2		648.39	1942.15	1941.08	3	2.078	1069	287	305	TRUE
fondue CG15825-PB, isoform B [Drosophila melanogaster]	gi|20129625	58012.6	1	7	9	86	0.000402	0.153	TRUE	S_A9Dros.2418.2418.3.dta	KVTTTASAPQLVQPVASSR	R	L	0.95	0	0	2.54	2		648.741	1943.2	1941.08	3	3.131	1610	287	305	TRUE
fondue CG15825-PB, isoform B [Drosophila melanogaster]	gi|20129625	58012.6	1	7	9	86	0.000402	0.153	TRUE	S_E9.3448.3448.3.dta	KVTTTASAPQLVQPVASSR	R	L	0.95	0	0	3.57	2		648.754	1943.24	1941.08	3	3.169	1630	287	305	TRUE
fondue CG15825-PB, isoform B [Drosophila melanogaster]	gi|20129625	58012.6	1	7	9	86	0.000402	0.153	TRUE	S_A9Dros.2891.2891.3.dta	IVEQPTQVTQTVPVQTAHYYQR	R	K	0.95	0	0	5.08	2		863.304	2586.89	2586.33	3	1.564	604.3	265	286	TRUE
fondue CG15825-PB, isoform B [Drosophila melanogaster]	gi|20129625	58012.6	1	7	9	86	0.000402	0.153	TRUE	ScaffoldIDNumber_122624_S_A9Dros.2883.2883.3.dta	IVEQPTQVTQTVPVQTAHYYQR	R	K	0.95	0	0	3.43	2		863.456	2587.34	2586.33	3	2.02	780.4	265	286	TRUE
fondue CG15825-PB, isoform B [Drosophila melanogaster]	gi|20129625	58012.6	1	7	9	86	0.000402	0.153	TRUE	ScaffoldIDNumber_237126_A9.3382.3382.3.dta	IVEQPTQVTQTVPVQTAHYYQR	R	K	0.95	0	0	4.92	2		863.457	2587.35	2586.33	3	2.025	782.3	265	286	TRUE
fondue CG15825-PB, isoform B [Drosophila melanogaster]	gi|20129625	58012.6	1	7	9	86	0.000402	0.153	TRUE	ScaffoldIDNumber_370299_S_F910.4782.4782.3.dta	IVEQPTQVTQTVPVQTAHYYQR	R	K	0.95	0	0	2.62	2		863.479	2587.41	2586.33	3	2.09	807.3	265	286	TRUE
fondue CG15825-PB, isoform B [Drosophila melanogaster]	gi|20129625	58012.6	1	7	9	86	0.000402	0.153	TRUE	S_E9.4668.4668.2.dta	IVEQPTQVTQTVPVQTAHYYQR	R	K	0.95	0	0	3.39	2		863.49	1724.96	2586.33	2	-860.4	-498500	265	286	TRUE
fondue CG15825-PB, isoform B [Drosophila melanogaster]	gi|20129625	58012.6	1	7	9	86	0.000402	0.153	TRUE	A9.3400.3401.2.dta	IVEQPTQVTQTVPVQTAHYYQR	R	K	0.95	0	0	4.66	2		863.551	1725.09	2586.33	2	-860.2	-498400	265	286	TRUE
AP-50 CG7057-PA, isoform A [Drosophila melanogaster]	gi|24649014,gi|28571823	49838.9	1	7	7	18	8.42e-05	0.22	TRUE	S_E9.3924.3924.3.dta	SGKPVVVIDDcQFHQcVK	R	L	0.95	0	0	3.24	2	c11: Carbamidomethyl (+57.02), c16: Carbamidomethyl (+57.02)	706.746	2117.21	2116.03	3	2.189	1034	238	255	TRUE
CG9066 CG9066-PA [Drosophila melanogaster]	gi|18859969	27903.3	1	7	8	38	0.000178	0.323	TRUE	S_E911.2316.2316.3.dta	KGEEPTNYDDDEDEENVNNDEQER	R	K	0.95	0	0	3.77	2		962.247	2883.72	2883.13	3	1.595	552.9	183	206	TRUE
CG9066 CG9066-PA [Drosophila melanogaster]	gi|18859969	27903.3	1	7	8	38	0.000178	0.323	TRUE	S_F911.2425.2425.2.dta	KGEEPTNYDDDEDEENVNNDEQER	R	K	0.95	0	0	3.01	2		962.328	1922.64	2883.13	2	-959.5	-498800	183	206	TRUE
Limpet CG32171-PB, isoform B [Drosophila melanogaster]	gi|21356031,gi|24665611,gi|45553163,gi|45553165	63655.6	1	7	9	62	0.00029	0.172	TRUE	S_E912.6906.6906.3.dta	DEKPYcAEcFGELFAK	R	R	0.95	0	0	3.44	2	c6: Carbamidomethyl (+57.02), c9: Carbamidomethyl (+57.02)	655.899	1964.67	1963.86	3	1.825	928.7	482	497	TRUE
Limpet CG32171-PB, isoform B [Drosophila melanogaster]	gi|21356031,gi|24665611,gi|45553163,gi|45553165	63655.6	1	7	9	62	0.00029	0.172	TRUE	S_E8.6993.6993.3.dta	DEKPYcAEcFGELFAK	R	R	0.95	0	0	3.85	2	c6: Carbamidomethyl (+57.02), c9: Carbamidomethyl (+57.02)	655.903	1964.69	1963.86	3	1.837	934.6	482	497	TRUE
CG6370 CG6370-PA [Drosophila melanogaster]	gi|19922486	69214.1	1	6	6	19	8.89e-05	0.137	TRUE	S_F911.4922.4922.3.dta	AVLVDESTSKPLAVHQAFVR	K	L	0.95	0	0	4.25	2		724.025	2169.05	2167.19	3	2.873	1324	420	439	TRUE
fau CG6544-PC, isoform C [Drosophila melanogaster]	gi|24645757	14353.4	1	5	6	39	0.000182	0.573	TRUE	ScaffoldIDNumber_278944_S_F5.3945.3945.3.dta	TSTTGAGPGGYSYSSTTSGNLPGGTK	R	Y	0.95	0	0	3.96	2		803.245	2406.71	2406.11	3	1.614	670.4	98	123	TRUE
fau CG6544-PC, isoform C [Drosophila melanogaster]	gi|24645757	14353.4	1	5	6	39	0.000182	0.573	TRUE	S_F5.3953.3953.3.dta	TSTTGAGPGGYSYSSTTSGNLPGGTK	R	Y	0.95	0	0	3.06	2		803.329	2406.96	2406.11	3	1.864	774.2	98	123	TRUE
fau CG6544-PC, isoform C [Drosophila melanogaster]	gi|24645757	14353.4	1	5	6	39	0.000182	0.573	TRUE	S_A3Dros.2515.2515.2.dta	TSTTGAGPGGYSYSSTTSGNLPGGTK	R	Y	0.95	0	0	3.11	2		803.471	1604.93	2406.11	2	-800.2	-498300	98	123	TRUE
fau CG6544-PC, isoform C [Drosophila melanogaster]	gi|24645757	14353.4	1	5	6	39	0.000182	0.573	TRUE	S_E4.3890.3890.3.dta	TSTTGAGPGGYSYSSTTSGNLPGGTK	R	Y	0.95	0	0	4.64	2		803.715	2408.12	2406.11	3	3.024	1255	98	123	TRUE
Salivary gland secretion 5 CG7596-PA [Drosophila melanogaster]	gi|17738017	18802.8	1	5	6	42	0.000197	0.331	TRUE	S_E3.5137.5137.3.dta	cFQNEcLmQIESDQR	R	K	0.95	0	0	2.52	2	c1: Carbamidomethyl (+57.02), c6: Carbamidomethyl (+57.02), m8: Oxidation (+15.99)	659.381	1975.12	1973.82	3	2.313	1170	69	83	TRUE
CG8036 CG8036-PD, isoform D [Drosophila melanogaster]	gi|24645119,gi|45550715,gi|45551847	63026.6	1	5	5	18	8.42e-05	0.131	TRUE	ScaffoldIDNumber_393154_S_F911.6036.6036.3.dta	TSRPNTcVIYDNEEPFTIGR	R	G	0.95	0	0	4.38	2	c7: Carbamidomethyl (+57.02)	791.03	2370.07	2369.12	3	1.955	824.5	430	449	TRUE
CG8036 CG8036-PD, isoform D [Drosophila melanogaster]	gi|24645119,gi|45550715,gi|45551847	63026.6	1	5	5	18	8.42e-05	0.131	TRUE	S_F911.6003.6003.3.dta	TSRPNTcVIYDNEEPFTIGR	R	G	0.95	0	0	3	2	c7: Carbamidomethyl (+57.02)	791.269	2370.78	2369.12	3	2.671	1126	430	449	TRUE
Lamin CG6944-PA [Drosophila melanogaster]	gi|17136290	71283.8	1	5	6	15	7.02e-05	0.169	TRUE	S_E911.2879.2880.3.dta	SVTAVDGNEQLYHQQGDPQQSNEK	R	C	0.95	0	0	3.47	2		891.944	2672.81	2672.22	3	1.597	597.1	595	618	TRUE
Lamin CG6944-PA [Drosophila melanogaster]	gi|17136290	71283.8	1	5	6	15	7.02e-05	0.169	TRUE	S_E7.2902.2902.3.dta	SVTAVDGNEQLYHQQGDPQQSNEK	R	C	0.95	0	0	3.08	2		892.023	2673.05	2672.22	3	1.835	686.4	595	618	TRUE
Lamin CG6944-PA [Drosophila melanogaster]	gi|17136290	71283.8	1	5	6	15	7.02e-05	0.169	TRUE	S_F911.2987.2987.2.dta	SVTAVDGNEQLYHQQGDPQQSNEK	R	C	0.95	0	0	4.42	2		892.136	1782.26	2672.22	2	-889	-498500	595	618	TRUE
CG5590 CG5590-PA [Drosophila melanogaster]	gi|21357673	44337.7	1	5	6	55	0.000257	0.15	TRUE	A8.2020.2020.3.dta	GAPVENEAAAEDAAAPASGGDVK	K	I	0.95	0	0	3.72	2		700.237	2097.69	2096.97	3	1.723	820.9	281	303	TRUE
CG13865 CG13865-PA, isoform A [Drosophila melanogaster]	gi|116007256	29622.5	1	4	4	9	4.21e-05	0.184	TRUE	S_F8.2379.2379.3.dta	KADQSAVTASSGSGTSSPPAGQPPLK	K	D	0.95	0	0	4.68	2		810.058	2427.15	2426.22	3	1.943	800.1	161	186	TRUE
Cytochrome b5-related CG13279-PA [Drosophila melanogaster]	gi|17137186	50339.3	1	4	4	9	4.21e-05	0.133	TRUE	S_E9.4838.4838.3.dta	GTDITEAFEAHHLTTAPEK	K	M	0.95	0	0	2.62	2		690.963	2069.87	2068	3	2.874	1388	71	89	TRUE
maggie CG14981-PA, isoform A [Drosophila melanogaster]	gi|17647639	16134.1	1	4	4	16	7.49e-05	0.25	TRUE	ScaffoldIDNumber_263164_S_F4.2586.2586.3.dta	AVAATSNDPQRENYDDEPDETASER	R	F	0.95	0	0	4.52	2		928.083	2781.22	2780.19	3	2.044	734.7	31	55	TRUE
Ribosomal protein LP1 CG4087-PA [Drosophila melanogaster]	gi|17136320	11495.2	1	3	4	15	7.02e-05	0.411	TRUE	ScaffoldIDNumber_279261_S_F5.6306.6306.3.dta	DLITNIGSGVGAAPAGGAAPAAAAAAPAAESK	K	K	0.95	0	0	4.72	2		907.326	2718.95	2718.41	3	1.556	572	58	89	TRUE
Protein on ecdysone puffs CG6143-PB, isoform B [Drosophila melanogaster]	gi|17864514,gi|45553181	78030.5	1	3	3	3	1.4e-05	0.088	TRUE	ScaffoldIDNumber_178969_S_E911.3068.3068.3.dta	EGAGDGEGAEGDEAEGEEAKEGEEAADETK	K	E	0.95	0	0	3.96	2		989.971	2966.89	2966.18	3	1.718	578.7	399	428	TRUE
Myosin heavy chain CG17927-PF, isoform F [Drosophila melanogaster]	gi|24584700	224516	0.998	2	2	20	9.36e-05	0.548	FALSE	ScaffoldIDNumber_232755_A9.3759.3759.3.dta	NVQQVTNSIGALcK	R	G	0.95	0	0	2.66	2	c13: Carbamidomethyl (+57.02)	512.02	1533.04	1531.79	3	2.253	1469	415	428	FALSE	gi|24584704,gi|28574239,gi|24584706,gi|24584710,gi|24584702,gi|24584712,gi|24584698
Myosin heavy chain CG17927-PF, isoform F [Drosophila melanogaster]	gi|24584700	224516	0.998	2	2	20	9.36e-05	0.548	FALSE	A9.2859.2859.2.dta	GAYEEGQEQLEAVR	K	R	0.95	0	0	2.6	2		527.581	1053.15	1578.74	2	-524.6	-497600	1485	1498	FALSE	gi|24584704,gi|28574239,gi|24584706,gi|24584710,gi|24584702,gi|24584712,gi|24584698
Myosin heavy chain CG17927-PF, isoform F [Drosophila melanogaster]	gi|24584700	224516	0.998	2	2	20	9.36e-05	0.548	FALSE	S_G2.5267.5267.3.dta	NKDPLNDTVVDQFK	K	K	0.95	0	0	2.7	2		545.629	1633.86	1632.82	3	2.049	1253	597	610	FALSE	gi|24584704,gi|28574239,gi|24584706,gi|24584710,gi|24584702,gi|24584712,gi|24584698
Myosin heavy chain CG17927-PF, isoform F [Drosophila melanogaster]	gi|24584700	224516	0.998	2	2	20	9.36e-05	0.548	FALSE	S_E912.5249.5249.3.dta	NKDPLNDTVVDQFK	K	K	0.95	0	0	2.68	2		545.679	1634.01	1632.82	3	2.198	1344	597	610	FALSE	gi|24584704,gi|28574239,gi|24584706,gi|24584710,gi|24584702,gi|24584712,gi|24584698
Myosin heavy chain CG17927-PF, isoform F [Drosophila melanogaster]	gi|24584700	224516	0.998	2	2	20	9.36e-05	0.548	FALSE	S_F912.4434.4434.2.dta	NKDPLNDTVVDQFKK	K	S	0.95	0	0	2.19	2		588.659	1175.3	1760.92	2	-584.6	-497000	597	611	FALSE	gi|24584704,gi|28574239,gi|24584706,gi|24584710,gi|24584702,gi|24584712,gi|24584698
Myosin heavy chain CG17927-PF, isoform F [Drosophila melanogaster]	gi|24584700	224516	0.998	2	2	20	9.36e-05	0.548	FALSE	S_E912.4747.4747.3.dta	TGEELQAAEDKINHLNK	K	V	0.95	0	0	2.62	2		638.059	1911.15	1909.96	3	2.2	1151	1005	1021	FALSE	gi|24584704,gi|28574239,gi|24584706,gi|24584710,gi|24584702,gi|24584712,gi|24584698
Myosin heavy chain CG17927-PF, isoform F [Drosophila melanogaster]	gi|24584700	224516	0.998	2	2	20	9.36e-05	0.548	FALSE	S_A10Dros.3126.3126.2.dta	DLEEANIQHESTLANLR	R	K	0.95	0	0	2.35	2		652.317	1302.62	1952.97	2	-649.3	-498100	1176	1192	FALSE	gi|24584704,gi|28574239,gi|24584706,gi|24584710,gi|24584702,gi|24584712,gi|24584698
Myosin heavy chain CG17927-PF, isoform F [Drosophila melanogaster]	gi|24584700	224516	0.998	2	2	20	9.36e-05	0.548	FALSE	S_F1.5161.5161.3.dta	DLEEANIQHESTLANLR	R	K	0.95	0	0	2.68	2		652.457	1954.35	1952.97	3	2.387	1221	1176	1192	FALSE	gi|24584704,gi|28574239,gi|24584706,gi|24584710,gi|24584702,gi|24584712,gi|24584698
Myosin heavy chain CG17927-PF, isoform F [Drosophila melanogaster]	gi|24584700	224516	0.998	2	2	20	9.36e-05	0.548	FALSE	S_F912.7643.7643.3.dta	GSLEDQVVQTNPVLEAFGNAK	K	T	0.95	0	0	4.82	2		739.971	2216.89	2216.12	3	1.778	801.8	213	233	FALSE	gi|24584704,gi|28574239,gi|24584706,gi|24584710,gi|24584702,gi|24584712,gi|24584698
Myosin heavy chain CG17927-PF, isoform F [Drosophila melanogaster]	gi|24584700	224516	0.998	2	2	20	9.36e-05	0.548	FALSE	S_F912.7634.7634.3.dta	GSLEDQVVQTNPVLEAFGNAK	K	T	0.95	0	0	4.64	2		740.028	2217.06	2216.12	3	1.948	878	213	233	FALSE	gi|24584704,gi|28574239,gi|24584706,gi|24584710,gi|24584702,gi|24584712,gi|24584698
Myosin heavy chain CG17927-PF, isoform F [Drosophila melanogaster]	gi|24584700	224516	0.998	2	2	20	9.36e-05	0.548	FALSE	S_F911.6843.6843.2.dta	AEDmSNLTYLNDASVLHNLR	K	Q	0.95	0	0	2.85	2	m4: Oxidation (+15.99)	765.203	1528.39	2292.09	2	-762.7	-498700	88	107	FALSE	gi|24584704,gi|28574239,gi|24584706,gi|24584710,gi|24584702,gi|24584712
Myosin heavy chain CG17927-PF, isoform F [Drosophila melanogaster]	gi|24584700	224516	0.998	2	2	20	9.36e-05	0.548	FALSE	S_G2.7333.7333.2.dta	AEDmSNLTYLNDASVLHNLR	K	Q	0.95	0	0	2.26	2	m4: Oxidation (+15.99)	765.238	1528.46	2292.09	2	-762.6	-498600	88	107	FALSE	gi|24584704,gi|28574239,gi|24584706,gi|24584710,gi|24584702,gi|24584712
Myosin heavy chain CG17927-PF, isoform F [Drosophila melanogaster]	gi|24584700	224516	0.998	2	2	20	9.36e-05	0.548	FALSE	ScaffoldIDNumber_109571_S_E8.6831.6831.3.dta	AEDmSNLTYLNDASVLHNLR	K	Q	0.95	0	0	2.62	2	m4: Oxidation (+15.99)	765.381	2293.12	2292.09	3	2.035	887.3	88	107	FALSE	gi|24584704,gi|28574239,gi|24584706,gi|24584710,gi|24584702,gi|24584712
Myosin heavy chain CG17927-PF, isoform F [Drosophila melanogaster]	gi|24584700	224516	0.998	2	2	20	9.36e-05	0.548	FALSE	S_F912.6861.6861.3.dta	AEDmSNLTYLNDASVLHNLR	K	Q	0.95	0	0	2.85	2	m4: Oxidation (+15.99)	765.504	2293.49	2292.09	3	2.402	1047	88	107	FALSE	gi|24584704,gi|28574239,gi|24584706,gi|24584710,gi|24584702,gi|24584712
Myosin heavy chain CG17927-PF, isoform F [Drosophila melanogaster]	gi|24584700	224516	0.998	2	2	20	9.36e-05	0.548	FALSE	S_F912.6853.6853.3.dta	AEDmSNLTYLNDASVLHNLR	K	Q	0.95	0	0	2.85	2	m4: Oxidation (+15.99)	765.794	2294.36	2292.09	3	3.272	1426	88	107	FALSE	gi|24584704,gi|28574239,gi|24584706,gi|24584710,gi|24584702,gi|24584712
Myosin heavy chain CG17927-PF, isoform F [Drosophila melanogaster]	gi|24584700	224516	0.998	2	2	20	9.36e-05	0.548	FALSE	S_E911.7297.7297.3.dta	SKGSLEDQVVQTNPVLEAFGNAK	K	T	0.95	0	0	4.28	2		811.849	2432.52	2431.25	3	2.285	939.1	211	233	FALSE	gi|24584704,gi|28574239,gi|24584706,gi|24584710,gi|24584702,gi|24584712,gi|24584698
Myosin heavy chain CG17927-PF, isoform F [Drosophila melanogaster]	gi|24584700	224516	0.998	2	2	20	9.36e-05	0.548	FALSE	S_F912.6708.6708.3.dta	qAEQELADAHEQLNEVSAQNASISAAK	R	R	0.95	0	0	5.8	2	n-term: Pyro-cmC (-17.03)	946.236	2835.68	2835.34	3	1.353	476.9	1700	1726	FALSE	gi|24584704,gi|28574239,gi|24584706,gi|24584710,gi|24584702,gi|24584712,gi|24584698
Myosin heavy chain CG17927-PF, isoform F [Drosophila melanogaster]	gi|24584700	224516	0.998	2	2	20	9.36e-05	0.548	FALSE	S_E912.6641.6641.3.dta	qAEQELADAHEQLNEVSAQNASISAAK	R	R	0.95	0	0	3.43	2	n-term: Pyro-cmC (-17.03)	946.272	2835.79	2835.34	3	1.461	514.9	1700	1726	FALSE	gi|24584704,gi|28574239,gi|24584706,gi|24584710,gi|24584702,gi|24584712,gi|24584698
Myosin heavy chain CG17927-PF, isoform F [Drosophila melanogaster]	gi|24584700	224516	0.998	2	2	20	9.36e-05	0.548	FALSE	S_F1.6491.6491.3.dta	qAEQELADAHEQLNEVSAQNASISAAK	R	R	0.95	0	0	6	2	n-term: Pyro-cmC (-17.03)	946.409	2836.2	2835.34	3	1.871	659.3	1700	1726	FALSE	gi|24584704,gi|28574239,gi|24584706,gi|24584710,gi|24584702,gi|24584712,gi|24584698
Myosin heavy chain CG17927-PF, isoform F [Drosophila melanogaster]	gi|24584700	224516	0.998	2	2	20	9.36e-05	0.548	FALSE	ScaffoldIDNumber_459769_S_G2.5960.5960.3.dta	QAEQELADAHEQLNEVSAQNASISAAK	R	R	0.95	0	0	3.17	2		951.962	2852.86	2852.37	3	1.505	527.5	1700	1726	FALSE	gi|24584704,gi|28574239,gi|24584706,gi|24584710,gi|24584702,gi|24584712,gi|24584698
Myosin heavy chain CG17927-PF, isoform F [Drosophila melanogaster]	gi|24584700	224516	0.998	2	2	20	9.36e-05	0.548	FALSE	S_F911.5394.5394.3.dta	QAEQELADAHEQLNEVSAQNASISAAK	R	R	0.95	0	0	4.09	2		952.027	2853.06	2852.37	3	1.7	595.7	1700	1726	FALSE	gi|24584704,gi|28574239,gi|24584706,gi|24584710,gi|24584702,gi|24584712,gi|24584698
Myosin heavy chain CG17927-PF, isoform F [Drosophila melanogaster]	gi|24584700	224516	0.998	2	2	20	9.36e-05	0.548	FALSE	S_F912.5838.5838.2.dta	QAEQELADAHEQLNEVSAQNASISAAK	R	R	0.95	0	0	2.8	2		952.159	1902.3	2852.37	2	-949.1	-498600	1700	1726	FALSE	gi|24584704,gi|28574239,gi|24584706,gi|24584710,gi|24584702,gi|24584712,gi|24584698
Myosin heavy chain CG17927-PF, isoform F [Drosophila melanogaster]	gi|24584700	224516	0.998	2	2	20	9.36e-05	0.548	FALSE	S_E9.5132.5132.3.dta	QAEQELADAHEQLNEVSAQNASISAAK	R	R	0.95	0	0	2.64	2		952.182	2853.52	2852.37	3	2.163	757.9	1700	1726	FALSE	gi|24584704,gi|28574239,gi|24584706,gi|24584710,gi|24584702,gi|24584712,gi|24584698
Myosin heavy chain CG17927-PF, isoform F [Drosophila melanogaster]	gi|24584700	224516	0.998	2	2	20	9.36e-05	0.548	FALSE	S_G3.5360.5360.3.dta	QAEQELADAHEQLNEVSAQNASISAAK	R	R	0.95	0	0	5.7	2		952.206	2853.59	2852.37	3	2.236	783.4	1700	1726	FALSE	gi|24584704,gi|28574239,gi|24584706,gi|24584710,gi|24584702,gi|24584712,gi|24584698
Myosin heavy chain CG17927-PF, isoform F [Drosophila melanogaster]	gi|24584700	224516	0.998	2	2	20	9.36e-05	0.548	FALSE	ScaffoldIDNumber_417367_S_F912.5849.5849.3.dta	QAEQELADAHEQLNEVSAQNASISAAK	R	R	0.95	0	0	3.52	2		952.394	2854.16	2852.37	3	2.8	980.8	1700	1726	FALSE	gi|24584704,gi|28574239,gi|24584706,gi|24584710,gi|24584702,gi|24584712,gi|24584698
Myosin heavy chain CG17927-PF, isoform F [Drosophila melanogaster]	gi|24584700	224516	0.998	2	2	20	9.36e-05	0.548	FALSE	S_E911.5143.5143.3.dta	QAEQELADAHEQLNEVSAQNASISAAK	R	R	0.95	0	0	2.62	2		952.41	2854.21	2852.37	3	2.849	998	1700	1726	FALSE	gi|24584704,gi|28574239,gi|24584706,gi|24584710,gi|24584702,gi|24584712,gi|24584698
Myosin heavy chain CG17927-PF, isoform F [Drosophila melanogaster]	gi|24584700	224516	0.998	2	2	20	9.36e-05	0.548	FALSE	S_F912.5269.5269.3.dta	QAEQELADAHEQLNEVSAQNASISAAK	R	R	0.95	0	0	2.96	2		952.428	2854.26	2852.37	3	2.903	1017	1700	1726	FALSE	gi|24584704,gi|28574239,gi|24584706,gi|24584710,gi|24584702,gi|24584712,gi|24584698
Myosin heavy chain CG17927-PF, isoform F [Drosophila melanogaster]	gi|24584700	224516	0.998	2	2	20	9.36e-05	0.548	FALSE	S_E911.4464.4464.3.dta	QAEQELADAHEQLNEVSAQNASISAAK	R	R	0.95	0	0	3.72	2		952.491	2854.45	2852.37	3	3.092	1083	1700	1726	FALSE	gi|24584704,gi|28574239,gi|24584706,gi|24584710,gi|24584702,gi|24584712,gi|24584698
Myosin heavy chain CG17927-PB, isoform B [Drosophila melanogaster]	gi|24584710	224397	0.998	2	2	9	4.21e-05	0.534	FALSE	ScaffoldIDNumber_232755_A9.3759.3759.3.dta	NVQQVTNSIGALcK	R	G	0.95	0	0	2.66	2	c13: Carbamidomethyl (+57.02)	512.02	1533.04	1531.79	3	2.253	1469	415	428	FALSE	gi|24584704,gi|24584700,gi|28574239,gi|24584706,gi|24584702,gi|24584712,gi|24584698
Myosin heavy chain CG17927-PB, isoform B [Drosophila melanogaster]	gi|24584710	224397	0.998	2	2	9	4.21e-05	0.534	FALSE	A9.2859.2859.2.dta	GAYEEGQEQLEAVR	K	R	0.95	0	0	2.6	2		527.581	1053.15	1578.74	2	-524.6	-497600	1485	1498	FALSE	gi|24584704,gi|24584700,gi|28574239,gi|24584706,gi|24584702,gi|24584712,gi|24584698
Myosin heavy chain CG17927-PB, isoform B [Drosophila melanogaster]	gi|24584710	224397	0.998	2	2	9	4.21e-05	0.534	FALSE	S_G2.5267.5267.3.dta	NKDPLNDTVVDQFK	K	K	0.95	0	0	2.7	2		545.629	1633.86	1632.82	3	2.049	1253	597	610	FALSE	gi|24584704,gi|24584700,gi|28574239,gi|24584706,gi|24584702,gi|24584712,gi|24584698
Myosin heavy chain CG17927-PB, isoform B [Drosophila melanogaster]	gi|24584710	224397	0.998	2	2	9	4.21e-05	0.534	FALSE	S_E912.5249.5249.3.dta	NKDPLNDTVVDQFK	K	K	0.95	0	0	2.68	2		545.679	1634.01	1632.82	3	2.198	1344	597	610	FALSE	gi|24584704,gi|24584700,gi|28574239,gi|24584706,gi|24584702,gi|24584712,gi|24584698
Myosin heavy chain CG17927-PB, isoform B [Drosophila melanogaster]	gi|24584710	224397	0.998	2	2	9	4.21e-05	0.534	FALSE	S_F912.4434.4434.2.dta	NKDPLNDTVVDQFKK	K	S	0.95	0	0	2.19	2		588.659	1175.3	1760.92	2	-584.6	-497000	597	611	FALSE	gi|24584704,gi|24584700,gi|28574239,gi|24584706,gi|24584702,gi|24584712,gi|24584698
Myosin heavy chain CG17927-PB, isoform B [Drosophila melanogaster]	gi|24584710	224397	0.998	2	2	9	4.21e-05	0.534	FALSE	S_E912.4747.4747.3.dta	TGEELQAAEDKINHLNK	K	V	0.95	0	0	2.62	2		638.059	1911.15	1909.96	3	2.2	1151	1005	1021	FALSE	gi|24584704,gi|24584700,gi|28574239,gi|24584706,gi|24584702,gi|24584712,gi|24584698
Myosin heavy chain CG17927-PB, isoform B [Drosophila melanogaster]	gi|24584710	224397	0.998	2	2	9	4.21e-05	0.534	FALSE	S_A10Dros.3126.3126.2.dta	DLEEANIQHESTLANLR	R	K	0.95	0	0	2.35	2		652.317	1302.62	1952.97	2	-649.3	-498100	1176	1192	FALSE	gi|24584704,gi|24584700,gi|28574239,gi|24584706,gi|24584702,gi|24584712,gi|24584698
Myosin heavy chain CG17927-PB, isoform B [Drosophila melanogaster]	gi|24584710	224397	0.998	2	2	9	4.21e-05	0.534	FALSE	S_F1.5161.5161.3.dta	DLEEANIQHESTLANLR	R	K	0.95	0	0	2.68	2		652.457	1954.35	1952.97	3	2.387	1221	1176	1192	FALSE	gi|24584704,gi|24584700,gi|28574239,gi|24584706,gi|24584702,gi|24584712,gi|24584698
Myosin heavy chain CG17927-PB, isoform B [Drosophila melanogaster]	gi|24584710	224397	0.998	2	2	9	4.21e-05	0.534	FALSE	S_F912.7643.7643.3.dta	GSLEDQVVQTNPVLEAFGNAK	K	T	0.95	0	0	4.82	2		739.971	2216.89	2216.12	3	1.778	801.8	213	233	FALSE	gi|24584704,gi|24584700,gi|28574239,gi|24584706,gi|24584702,gi|24584712,gi|24584698
Myosin heavy chain CG17927-PB, isoform B [Drosophila melanogaster]	gi|24584710	224397	0.998	2	2	9	4.21e-05	0.534	FALSE	S_F912.7634.7634.3.dta	GSLEDQVVQTNPVLEAFGNAK	K	T	0.95	0	0	4.64	2		740.028	2217.06	2216.12	3	1.948	878	213	233	FALSE	gi|24584704,gi|24584700,gi|28574239,gi|24584706,gi|24584702,gi|24584712,gi|24584698
Myosin heavy chain CG17927-PB, isoform B [Drosophila melanogaster]	gi|24584710	224397	0.998	2	2	9	4.21e-05	0.534	FALSE	S_F911.6843.6843.2.dta	AEDmSNLTYLNDASVLHNLR	K	Q	0.95	0	0	2.85	2	m4: Oxidation (+15.99)	765.203	1528.39	2292.09	2	-762.7	-498700	88	107	FALSE	gi|24584704,gi|24584700,gi|28574239,gi|24584706,gi|24584702,gi|24584712
Myosin heavy chain CG17927-PB, isoform B [Drosophila melanogaster]	gi|24584710	224397	0.998	2	2	9	4.21e-05	0.534	FALSE	S_G2.7333.7333.2.dta	AEDmSNLTYLNDASVLHNLR	K	Q	0.95	0	0	2.26	2	m4: Oxidation (+15.99)	765.238	1528.46	2292.09	2	-762.6	-498600	88	107	FALSE	gi|24584704,gi|24584700,gi|28574239,gi|24584706,gi|24584702,gi|24584712
Myosin heavy chain CG17927-PB, isoform B [Drosophila melanogaster]	gi|24584710	224397	0.998	2	2	9	4.21e-05	0.534	FALSE	ScaffoldIDNumber_109571_S_E8.6831.6831.3.dta	AEDmSNLTYLNDASVLHNLR	K	Q	0.95	0	0	2.62	2	m4: Oxidation (+15.99)	765.381	2293.12	2292.09	3	2.035	887.3	88	107	FALSE	gi|24584704,gi|24584700,gi|28574239,gi|24584706,gi|24584702,gi|24584712
Myosin heavy chain CG17927-PB, isoform B [Drosophila melanogaster]	gi|24584710	224397	0.998	2	2	9	4.21e-05	0.534	FALSE	S_F912.6861.6861.3.dta	AEDmSNLTYLNDASVLHNLR	K	Q	0.95	0	0	2.85	2	m4: Oxidation (+15.99)	765.504	2293.49	2292.09	3	2.402	1047	88	107	FALSE	gi|24584704,gi|24584700,gi|28574239,gi|24584706,gi|24584702,gi|24584712
Myosin heavy chain CG17927-PB, isoform B [Drosophila melanogaster]	gi|24584710	224397	0.998	2	2	9	4.21e-05	0.534	FALSE	S_F912.6853.6853.3.dta	AEDmSNLTYLNDASVLHNLR	K	Q	0.95	0	0	2.85	2	m4: Oxidation (+15.99)	765.794	2294.36	2292.09	3	3.272	1426	88	107	FALSE	gi|24584704,gi|24584700,gi|28574239,gi|24584706,gi|24584702,gi|24584712
Myosin heavy chain CG17927-PB, isoform B [Drosophila melanogaster]	gi|24584710	224397	0.998	2	2	9	4.21e-05	0.534	FALSE	S_E911.7297.7297.3.dta	SKGSLEDQVVQTNPVLEAFGNAK	K	T	0.95	0	0	4.28	2		811.849	2432.52	2431.25	3	2.285	939.1	211	233	FALSE	gi|24584704,gi|24584700,gi|28574239,gi|24584706,gi|24584702,gi|24584712,gi|24584698
Myosin heavy chain CG17927-PB, isoform B [Drosophila melanogaster]	gi|24584710	224397	0.998	2	2	9	4.21e-05	0.534	FALSE	S_F912.6708.6708.3.dta	qAEQELADAHEQLNEVSAQNASISAAK	R	R	0.95	0	0	5.8	2	n-term: Pyro-cmC (-17.03)	946.236	2835.68	2835.34	3	1.353	476.9	1700	1726	FALSE	gi|24584704,gi|24584700,gi|28574239,gi|24584706,gi|24584702,gi|24584712,gi|24584698
Myosin heavy chain CG17927-PB, isoform B [Drosophila melanogaster]	gi|24584710	224397	0.998	2	2	9	4.21e-05	0.534	FALSE	S_E912.6641.6641.3.dta	qAEQELADAHEQLNEVSAQNASISAAK	R	R	0.95	0	0	3.43	2	n-term: Pyro-cmC (-17.03)	946.272	2835.79	2835.34	3	1.461	514.9	1700	1726	FALSE	gi|24584704,gi|24584700,gi|28574239,gi|24584706,gi|24584702,gi|24584712,gi|24584698
Myosin heavy chain CG17927-PB, isoform B [Drosophila melanogaster]	gi|24584710	224397	0.998	2	2	9	4.21e-05	0.534	FALSE	S_F1.6491.6491.3.dta	qAEQELADAHEQLNEVSAQNASISAAK	R	R	0.95	0	0	6	2	n-term: Pyro-cmC (-17.03)	946.409	2836.2	2835.34	3	1.871	659.3	1700	1726	FALSE	gi|24584704,gi|24584700,gi|28574239,gi|24584706,gi|24584702,gi|24584712,gi|24584698
Myosin heavy chain CG17927-PB, isoform B [Drosophila melanogaster]	gi|24584710	224397	0.998	2	2	9	4.21e-05	0.534	FALSE	ScaffoldIDNumber_459769_S_G2.5960.5960.3.dta	QAEQELADAHEQLNEVSAQNASISAAK	R	R	0.95	0	0	3.17	2		951.962	2852.86	2852.37	3	1.505	527.5	1700	1726	FALSE	gi|24584704,gi|24584700,gi|28574239,gi|24584706,gi|24584702,gi|24584712,gi|24584698
Myosin heavy chain CG17927-PB, isoform B [Drosophila melanogaster]	gi|24584710	224397	0.998	2	2	9	4.21e-05	0.534	FALSE	S_F911.5394.5394.3.dta	QAEQELADAHEQLNEVSAQNASISAAK	R	R	0.95	0	0	4.09	2		952.027	2853.06	2852.37	3	1.7	595.7	1700	1726	FALSE	gi|24584704,gi|24584700,gi|28574239,gi|24584706,gi|24584702,gi|24584712,gi|24584698
Myosin heavy chain CG17927-PB, isoform B [Drosophila melanogaster]	gi|24584710	224397	0.998	2	2	9	4.21e-05	0.534	FALSE	S_F912.5838.5838.2.dta	QAEQELADAHEQLNEVSAQNASISAAK	R	R	0.95	0	0	2.8	2		952.159	1902.3	2852.37	2	-949.1	-498600	1700	1726	FALSE	gi|24584704,gi|24584700,gi|28574239,gi|24584706,gi|24584702,gi|24584712,gi|24584698
Myosin heavy chain CG17927-PB, isoform B [Drosophila melanogaster]	gi|24584710	224397	0.998	2	2	9	4.21e-05	0.534	FALSE	S_E9.5132.5132.3.dta	QAEQELADAHEQLNEVSAQNASISAAK	R	R	0.95	0	0	2.64	2		952.182	2853.52	2852.37	3	2.163	757.9	1700	1726	FALSE	gi|24584704,gi|24584700,gi|28574239,gi|24584706,gi|24584702,gi|24584712,gi|24584698
Myosin heavy chain CG17927-PB, isoform B [Drosophila melanogaster]	gi|24584710	224397	0.998	2	2	9	4.21e-05	0.534	FALSE	S_G3.5360.5360.3.dta	QAEQELADAHEQLNEVSAQNASISAAK	R	R	0.95	0	0	5.7	2		952.206	2853.59	2852.37	3	2.236	783.4	1700	1726	FALSE	gi|24584704,gi|24584700,gi|28574239,gi|24584706,gi|24584702,gi|24584712,gi|24584698
Myosin heavy chain CG17927-PB, isoform B [Drosophila melanogaster]	gi|24584710	224397	0.998	2	2	9	4.21e-05	0.534	FALSE	ScaffoldIDNumber_417367_S_F912.5849.5849.3.dta	QAEQELADAHEQLNEVSAQNASISAAK	R	R	0.95	0	0	3.52	2		952.394	2854.16	2852.37	3	2.8	980.8	1700	1726	FALSE	gi|24584704,gi|24584700,gi|28574239,gi|24584706,gi|24584702,gi|24584712,gi|24584698
Myosin heavy chain CG17927-PB, isoform B [Drosophila melanogaster]	gi|24584710	224397	0.998	2	2	9	4.21e-05	0.534	FALSE	S_E911.5143.5143.3.dta	QAEQELADAHEQLNEVSAQNASISAAK	R	R	0.95	0	0	2.62	2		952.41	2854.21	2852.37	3	2.849	998	1700	1726	FALSE	gi|24584704,gi|24584700,gi|28574239,gi|24584706,gi|24584702,gi|24584712,gi|24584698
Myosin heavy chain CG17927-PB, isoform B [Drosophila melanogaster]	gi|24584710	224397	0.998	2	2	9	4.21e-05	0.534	FALSE	S_F912.5269.5269.3.dta	QAEQELADAHEQLNEVSAQNASISAAK	R	R	0.95	0	0	2.96	2		952.428	2854.26	2852.37	3	2.903	1017	1700	1726	FALSE	gi|24584704,gi|24584700,gi|28574239,gi|24584706,gi|24584702,gi|24584712,gi|24584698
Myosin heavy chain CG17927-PB, isoform B [Drosophila melanogaster]	gi|24584710	224397	0.998	2	2	9	4.21e-05	0.534	FALSE	S_E911.4464.4464.3.dta	QAEQELADAHEQLNEVSAQNASISAAK	R	R	0.95	0	0	3.72	2		952.491	2854.45	2852.37	3	3.092	1083	1700	1726	FALSE	gi|24584704,gi|24584700,gi|28574239,gi|24584706,gi|24584702,gi|24584712,gi|24584698
wings up A CG7178-PG, isoform G [Drosophila melanogaster]	gi|24642963	30064.7	1	2	3	4	1.87e-05	0.275	TRUE	ScaffoldIDNumber_108959_S_E8.2279.2279.3.dta	AAAPAAAPAAAAKPAAPAAAPAANGK	K	A	0.95	0	0	5.57	2		714.319	2139.93	2139.17	3	1.773	828.1	8	33	TRUE
wings up A CG7178-PG, isoform G [Drosophila melanogaster]	gi|24642963	30064.7	1	2	3	4	1.87e-05	0.275	TRUE	S_E8.2227.2227.2.dta	AAAPAAAPAAAAKPAAPAAAPAANGK	K	A	0.95	0	0	2.21	2		714.838	1427.66	2139.17	2	-710.5	-497300	8	33	TRUE
SF2 CG6987-PA [Drosophila melanogaster]	gi|21358097	28332.8	1	2	2	2	9.36e-06	0.098	TRUE	B1.4684.4684.3.dta	GGGGGGSGGGGGGSGGGGSRDYRDR	R	S	0.95	0	0	3.33	2		686.291	2055.85	2053.88	3	2.979	1449	196	220	TRUE
uninitiated CG4008-PA [Drosophila melanogaster]	gi|17137568	49788.2	0.998	2	2	7	3.28e-05	0.0848	TRUE	S_E910.2568.2568.3.dta	IASGEGGDEELTTNGDAKPATPAAQPAK	K	K	0.95	0	0	4.52	2		899.995	2696.96	2696.3	3	1.667	618.1	41	68	TRUE
uninitiated CG4008-PA [Drosophila melanogaster]	gi|17137568	49788.2	0.998	2	2	7	3.28e-05	0.0848	TRUE	S_E910.2595.2595.3.dta	IASGEGGDEELTTNGDAKPATPAAQPAK	K	K	0.95	0	0	4.55	2		900.098	2697.27	2696.3	3	1.976	732.5	41	68	TRUE
uninitiated CG4008-PA [Drosophila melanogaster]	gi|17137568	49788.2	0.998	2	2	7	3.28e-05	0.0848	TRUE	ScaffoldIDNumber_370455_S_F910.2714.2714.3.dta	IASGEGGDEELTTNGDAKPATPAAQPAK	K	K	0.95	0	0	4.8	2		900.319	2697.93	2696.3	3	2.638	977.6	41	68	TRUE
CG6020 CG6020-PA [Drosophila melanogaster]	gi|24667554	46804.8	0.998	2	2	2	9.36e-06	0.0697	TRUE	S_F910.6127.6127.2.dta	LNSFIcPGTPIGGLHPAR	K	I	0.95	0	0	3.66	2	c6: Carbamidomethyl (+57.02)	636.974	1271.93	1907	2	-634.1	-498100	329	346	TRUE
Eukaryotic initiation factor 4E CG4035-PB, isoform B [Drosophila melanogaster]	gi|17864468,gi|24661542,gi|24661546,gi|24661553,gi|24661557,gi|24661561,gi|24661565	29206.7	0.998	2	3	21	9.83e-05	0.193	TRUE	S_E910.2146.2146.3.dta	TSAPSTEQGRPEPPTSAAAPAEAK	K	D	0.95	0	0	3.68	2		784.923	2351.75	2351.15	3	1.605	682.3	20	43	TRUE
CG15093 CG15093-PB, isoform B [Drosophila melanogaster]	gi|19922568,gi|24655230	33865.7	0.998	2	3	5	2.34e-05	0.114	TRUE	S_E8.7035.7035.2.dta	DLGLASGVANASNSPIPLGSLAHK	K	V	0.95	0	0	4.85	2		764.262	1526.51	2289.22	2	-761.7	-498700	272	295	TRUE
CG15093 CG15093-PB, isoform B [Drosophila melanogaster]	gi|19922568,gi|24655230	33865.7	0.998	2	3	5	2.34e-05	0.114	TRUE	S_E8.7042.7042.2.dta	DLGLASGVANASNSPIPLGSLAHK	K	V	0.95	0	0	5.34	2		764.531	1527.05	2289.22	2	-761.2	-498100	272	295	TRUE
NP15.6 CG6008-PA [Drosophila melanogaster]	gi|21356773	16954.5	0.999	2	2	7	3.28e-05	0.193	TRUE	S_E4.5521.5521.3.dta	KDETITAPTSLTTEDFANPSPK	K	N	0.95	0	0	3.4	2		789.201	2364.58	2363.16	3	2.424	1025	35	56	TRUE
NP15.6 CG6008-PA [Drosophila melanogaster]	gi|21356773	16954.5	0.999	2	2	7	3.28e-05	0.193	TRUE	S_E4.5494.5494.3.dta	KDETITAPTSLTTEDFANPSPK	K	N	0.95	0	0	3.96	2		789.248	2364.72	2363.16	3	2.566	1085	35	56	TRUE
Myosin heavy chain CG17927-PJ, isoform J [Drosophila melanogaster]	gi|24584698	224394	0.998	2	2	3	1.4e-05	0.541	FALSE	ScaffoldIDNumber_232755_A9.3759.3759.3.dta	NVQQVTNSIGALcK	R	G	0.95	0	0	2.66	2	c13: Carbamidomethyl (+57.02)	512.02	1533.04	1531.79	3	2.253	1469	413	426	FALSE	gi|24584704,gi|24584700,gi|28574239,gi|24584706,gi|24584710,gi|24584702,gi|24584712
Myosin heavy chain CG17927-PJ, isoform J [Drosophila melanogaster]	gi|24584698	224394	0.998	2	2	3	1.4e-05	0.541	FALSE	A9.2859.2859.2.dta	GAYEEGQEQLEAVR	K	R	0.95	0	0	2.6	2		527.581	1053.15	1578.74	2	-524.6	-497600	1483	1496	FALSE	gi|24584704,gi|24584700,gi|28574239,gi|24584706,gi|24584710,gi|24584702,gi|24584712
Myosin heavy chain CG17927-PJ, isoform J [Drosophila melanogaster]	gi|24584698	224394	0.998	2	2	3	1.4e-05	0.541	FALSE	S_G2.5267.5267.3.dta	NKDPLNDTVVDQFK	K	K	0.95	0	0	2.7	2		545.629	1633.86	1632.82	3	2.049	1253	595	608	FALSE	gi|24584704,gi|24584700,gi|28574239,gi|24584706,gi|24584710,gi|24584702,gi|24584712
Myosin heavy chain CG17927-PJ, isoform J [Drosophila melanogaster]	gi|24584698	224394	0.998	2	2	3	1.4e-05	0.541	FALSE	S_E912.5249.5249.3.dta	NKDPLNDTVVDQFK	K	K	0.95	0	0	2.68	2		545.679	1634.01	1632.82	3	2.198	1344	595	608	FALSE	gi|24584704,gi|24584700,gi|28574239,gi|24584706,gi|24584710,gi|24584702,gi|24584712
Myosin heavy chain CG17927-PJ, isoform J [Drosophila melanogaster]	gi|24584698	224394	0.998	2	2	3	1.4e-05	0.541	FALSE	S_F912.4434.4434.2.dta	NKDPLNDTVVDQFKK	K	S	0.95	0	0	2.19	2		588.659	1175.3	1760.92	2	-584.6	-497000	595	609	FALSE	gi|24584704,gi|24584700,gi|28574239,gi|24584706,gi|24584710,gi|24584702,gi|24584712
Myosin heavy chain CG17927-PJ, isoform J [Drosophila melanogaster]	gi|24584698	224394	0.998	2	2	3	1.4e-05	0.541	FALSE	S_E912.4747.4747.3.dta	TGEELQAAEDKINHLNK	K	V	0.95	0	0	2.62	2		638.059	1911.15	1909.96	3	2.2	1151	1003	1019	FALSE	gi|24584704,gi|24584700,gi|28574239,gi|24584706,gi|24584710,gi|24584702,gi|24584712
Myosin heavy chain CG17927-PJ, isoform J [Drosophila melanogaster]	gi|24584698	224394	0.998	2	2	3	1.4e-05	0.541	FALSE	S_A10Dros.3126.3126.2.dta	DLEEANIQHESTLANLR	R	K	0.95	0	0	2.35	2		652.317	1302.62	1952.97	2	-649.3	-498100	1174	1190	FALSE	gi|24584704,gi|24584700,gi|28574239,gi|24584706,gi|24584710,gi|24584702,gi|24584712
Myosin heavy chain CG17927-PJ, isoform J [Drosophila melanogaster]	gi|24584698	224394	0.998	2	2	3	1.4e-05	0.541	FALSE	S_F1.5161.5161.3.dta	DLEEANIQHESTLANLR	R	K	0.95	0	0	2.68	2		652.457	1954.35	1952.97	3	2.387	1221	1174	1190	FALSE	gi|24584704,gi|24584700,gi|28574239,gi|24584706,gi|24584710,gi|24584702,gi|24584712
Myosin heavy chain CG17927-PJ, isoform J [Drosophila melanogaster]	gi|24584698	224394	0.998	2	2	3	1.4e-05	0.541	FALSE	S_F912.7643.7643.3.dta	GSLEDQVVQTNPVLEAFGNAK	K	T	0.95	0	0	4.82	2		739.971	2216.89	2216.12	3	1.778	801.8	213	233	FALSE	gi|24584704,gi|24584700,gi|28574239,gi|24584706,gi|24584710,gi|24584702,gi|24584712
Myosin heavy chain CG17927-PJ, isoform J [Drosophila melanogaster]	gi|24584698	224394	0.998	2	2	3	1.4e-05	0.541	FALSE	S_F912.7634.7634.3.dta	GSLEDQVVQTNPVLEAFGNAK	K	T	0.95	0	0	4.64	2		740.028	2217.06	2216.12	3	1.948	878	213	233	FALSE	gi|24584704,gi|24584700,gi|28574239,gi|24584706,gi|24584710,gi|24584702,gi|24584712
Myosin heavy chain CG17927-PJ, isoform J [Drosophila melanogaster]	gi|24584698	224394	0.998	2	2	3	1.4e-05	0.541	FALSE	S_E911.7297.7297.3.dta	SKGSLEDQVVQTNPVLEAFGNAK	K	T	0.95	0	0	4.28	2		811.849	2432.52	2431.25	3	2.285	939.1	211	233	FALSE	gi|24584704,gi|24584700,gi|28574239,gi|24584706,gi|24584710,gi|24584702,gi|24584712
Myosin heavy chain CG17927-PJ, isoform J [Drosophila melanogaster]	gi|24584698	224394	0.998	2	2	3	1.4e-05	0.541	FALSE	S_F912.6708.6708.3.dta	qAEQELADAHEQLNEVSAQNASISAAK	R	R	0.95	0	0	5.8	2	n-term: Pyro-cmC (-17.03)	946.236	2835.68	2835.34	3	1.353	476.9	1698	1724	FALSE	gi|24584704,gi|24584700,gi|28574239,gi|24584706,gi|24584710,gi|24584702,gi|24584712
Myosin heavy chain CG17927-PJ, isoform J [Drosophila melanogaster]	gi|24584698	224394	0.998	2	2	3	1.4e-05	0.541	FALSE	S_E912.6641.6641.3.dta	qAEQELADAHEQLNEVSAQNASISAAK	R	R	0.95	0	0	3.43	2	n-term: Pyro-cmC (-17.03)	946.272	2835.79	2835.34	3	1.461	514.9	1698	1724	FALSE	gi|24584704,gi|24584700,gi|28574239,gi|24584706,gi|24584710,gi|24584702,gi|24584712
Myosin heavy chain CG17927-PJ, isoform J [Drosophila melanogaster]	gi|24584698	224394	0.998	2	2	3	1.4e-05	0.541	FALSE	S_F1.6491.6491.3.dta	qAEQELADAHEQLNEVSAQNASISAAK	R	R	0.95	0	0	6	2	n-term: Pyro-cmC (-17.03)	946.409	2836.2	2835.34	3	1.871	659.3	1698	1724	FALSE	gi|24584704,gi|24584700,gi|28574239,gi|24584706,gi|24584710,gi|24584702,gi|24584712
Myosin heavy chain CG17927-PJ, isoform J [Drosophila melanogaster]	gi|24584698	224394	0.998	2	2	3	1.4e-05	0.541	FALSE	ScaffoldIDNumber_459769_S_G2.5960.5960.3.dta	QAEQELADAHEQLNEVSAQNASISAAK	R	R	0.95	0	0	3.17	2		951.962	2852.86	2852.37	3	1.505	527.5	1698	1724	FALSE	gi|24584704,gi|24584700,gi|28574239,gi|24584706,gi|24584710,gi|24584702,gi|24584712
Myosin heavy chain CG17927-PJ, isoform J [Drosophila melanogaster]	gi|24584698	224394	0.998	2	2	3	1.4e-05	0.541	FALSE	S_F911.5394.5394.3.dta	QAEQELADAHEQLNEVSAQNASISAAK	R	R	0.95	0	0	4.09	2		952.027	2853.06	2852.37	3	1.7	595.7	1698	1724	FALSE	gi|24584704,gi|24584700,gi|28574239,gi|24584706,gi|24584710,gi|24584702,gi|24584712
Myosin heavy chain CG17927-PJ, isoform J [Drosophila melanogaster]	gi|24584698	224394	0.998	2	2	3	1.4e-05	0.541	FALSE	S_F912.5838.5838.2.dta	QAEQELADAHEQLNEVSAQNASISAAK	R	R	0.95	0	0	2.8	2		952.159	1902.3	2852.37	2	-949.1	-498600	1698	1724	FALSE	gi|24584704,gi|24584700,gi|28574239,gi|24584706,gi|24584710,gi|24584702,gi|24584712
Myosin heavy chain CG17927-PJ, isoform J [Drosophila melanogaster]	gi|24584698	224394	0.998	2	2	3	1.4e-05	0.541	FALSE	S_E9.5132.5132.3.dta	QAEQELADAHEQLNEVSAQNASISAAK	R	R	0.95	0	0	2.64	2		952.182	2853.52	2852.37	3	2.163	757.9	1698	1724	FALSE	gi|24584704,gi|24584700,gi|28574239,gi|24584706,gi|24584710,gi|24584702,gi|24584712
Myosin heavy chain CG17927-PJ, isoform J [Drosophila melanogaster]	gi|24584698	224394	0.998	2	2	3	1.4e-05	0.541	FALSE	S_G3.5360.5360.3.dta	QAEQELADAHEQLNEVSAQNASISAAK	R	R	0.95	0	0	5.7	2		952.206	2853.59	2852.37	3	2.236	783.4	1698	1724	FALSE	gi|24584704,gi|24584700,gi|28574239,gi|24584706,gi|24584710,gi|24584702,gi|24584712
Myosin heavy chain CG17927-PJ, isoform J [Drosophila melanogaster]	gi|24584698	224394	0.998	2	2	3	1.4e-05	0.541	FALSE	ScaffoldIDNumber_417367_S_F912.5849.5849.3.dta	QAEQELADAHEQLNEVSAQNASISAAK	R	R	0.95	0	0	3.52	2		952.394	2854.16	2852.37	3	2.8	980.8	1698	1724	FALSE	gi|24584704,gi|24584700,gi|28574239,gi|24584706,gi|24584710,gi|24584702,gi|24584712
Myosin heavy chain CG17927-PJ, isoform J [Drosophila melanogaster]	gi|24584698	224394	0.998	2	2	3	1.4e-05	0.541	FALSE	S_E911.5143.5143.3.dta	QAEQELADAHEQLNEVSAQNASISAAK	R	R	0.95	0	0	2.62	2		952.41	2854.21	2852.37	3	2.849	998	1698	1724	FALSE	gi|24584704,gi|24584700,gi|28574239,gi|24584706,gi|24584710,gi|24584702,gi|24584712
Myosin heavy chain CG17927-PJ, isoform J [Drosophila melanogaster]	gi|24584698	224394	0.998	2	2	3	1.4e-05	0.541	FALSE	S_F912.5269.5269.3.dta	QAEQELADAHEQLNEVSAQNASISAAK	R	R	0.95	0	0	2.96	2		952.428	2854.26	2852.37	3	2.903	1017	1698	1724	FALSE	gi|24584704,gi|24584700,gi|28574239,gi|24584706,gi|24584710,gi|24584702,gi|24584712
Myosin heavy chain CG17927-PJ, isoform J [Drosophila melanogaster]	gi|24584698	224394	0.998	2	2	3	1.4e-05	0.541	FALSE	S_E911.4464.4464.3.dta	QAEQELADAHEQLNEVSAQNASISAAK	R	R	0.95	0	0	3.72	2		952.491	2854.45	2852.37	3	3.092	1083	1698	1724	FALSE	gi|24584704,gi|24584700,gi|28574239,gi|24584706,gi|24584710,gi|24584702,gi|24584712
CDP diglyceride synthetase CG7962-PA [Drosophila melanogaster]	gi|17864222	51496	0.998	2	3	8	3.74e-05	0.0694	TRUE	S_E8.3037.3037.2.dta	KGEDEPLEDTAISGSDAANKR	R	N	0.95	0	0	4.52	2		735.799	1469.58	2203.05	2	-732.5	-498100	8	28	TRUE
CDP diglyceride synthetase CG7962-PA [Drosophila melanogaster]	gi|17864222	51496	0.998	2	3	8	3.74e-05	0.0694	TRUE	S_F910.3031.3031.2.dta	KGEDEPLEDTAISGSDAANKR	R	N	0.95	0	0	4.7	2		735.89	1469.76	2203.05	2	-732.3	-497900	8	28	TRUE
CG6950 CG6950-PB, isoform B [Drosophila melanogaster]	gi|24646114,gi|28573065,gi|28573067,gi|28573069	51185.9	0.998	2	2	2	9.36e-06	0.08	TRUE	S_F910.4642.4642.3.dta	NLQmVHQNSVYTcPTPLQEGVAR	R	S	0.95	0	0	3.92	2	c13: Carbamidomethyl (+57.02), m4: Oxidation (+15.99)	887.608	2659.8	2658.28	3	2.532	951.4	300	322	TRUE
CG1041 CG1041-PB, isoform B [Drosophila melanogaster]	gi|116007970,gi|45550701	74286.1	0.998	2	2	3	1.4e-05	0.0472	TRUE	A9.2459.2459.2.dta	MKEDPSFGQSGSQDFAPAQK	K	I	0.95	0	0	2.64	2		719.835	1437.65	2154.98	2	-716.3	-497900	388	407	TRUE
CG1309 CG1309-PA [Drosophila melanogaster]	gi|21355871	58386.7	0.5	1	2	6	2.81e-05	0.0324	TRUE	S_A9Dros.2261.2261.3.dta	RTEDEIIAEDNHIDTNR	R	G	0.95	0	0	3.43	2		681.51	2041.51	2040.96	3	1.555	761.2	391	407	TRUE
CG1309 CG1309-PA [Drosophila melanogaster]	gi|21355871	58386.7	0.5	1	2	6	2.81e-05	0.0324	TRUE	ScaffoldIDNumber_131364_S_E9.3093.3093.3.dta	RTEDEIIAEDNHIDTNR	R	G	0.95	0	0	5.64	2		681.516	2041.53	2040.96	3	1.575	770.9	391	407	TRUE
CG1309 CG1309-PA [Drosophila melanogaster]	gi|21355871	58386.7	0.5	1	2	6	2.81e-05	0.0324	TRUE	S_E9.3088.3088.3.dta	RTEDEIIAEDNHIDTNR	R	G	0.95	0	0	4.38	2		681.607	2041.8	2040.96	3	1.845	903.4	391	407	TRUE
terribly reduced optic lobes CG33950-PG, isoform G [Drosophila melanogaster]	gi|161077537	459070	0.5	1	1	4	1.87e-05	0.256	FALSE	S_G1.6460.6460.3.dta	TDSQILVLTNLRPEDAGR	R	Y	0.95	0	0	2.59	2		667.738	2000.19	1998.06	3	3.136	1567	3211	3228	FALSE	gi|78706474
terribly reduced optic lobes CG33950-PG, isoform G [Drosophila melanogaster]	gi|161077537	459070	0.5	1	1	4	1.87e-05	0.256	FALSE	ScaffoldIDNumber_236547_A9.3428.3428.3.dta	LIWSRPDGNENQEEYNVR	K	L	0.95	0	0	3.21	2		741.379	2221.11	2219.05	3	3.074	1384	2216	2233	FALSE	gi|78706474
terribly reduced optic lobes CG33950-PG, isoform G [Drosophila melanogaster]	gi|161077537	459070	0.5	1	1	4	1.87e-05	0.256	FALSE	S_F2.4278.4278.3.dta	RcEQcAAGYQGNPLAAGGIcR	R	R	0.95	0	0	6.49	2	c2: Carbamidomethyl (+57.02), c5: Carbamidomethyl (+57.02), c20: Carbamidomethyl (+57.02)	771.134	2310.38	2309.03	3	2.353	1018	1674	1694	FALSE	gi|78706474
terribly reduced optic lobes CG33950-PG, isoform G [Drosophila melanogaster]	gi|161077537	459070	0.5	1	1	4	1.87e-05	0.256	FALSE	S_G1.3899.3899.3.dta	cPDmRPQDSGAYScEIINTR	R	G	0.95	0	0	2.62	2	c1: Carbamidomethyl (+57.02), c14: Carbamidomethyl (+57.02), m4: Oxidation (+15.99)	796.583	2386.72	2386.02	3	1.71	716.1	1322	1341	FALSE	gi|78706474
terribly reduced optic lobes CG33950-PG, isoform G [Drosophila melanogaster]	gi|161077537	459070	0.5	1	1	4	1.87e-05	0.256	FALSE	S_G1.3887.3887.3.dta	cPDmRPQDSGAYScEIINTR	R	G	0.95	0	0	2.6	2	c1: Carbamidomethyl (+57.02), c14: Carbamidomethyl (+57.02), m4: Oxidation (+15.99)	796.882	2387.62	2386.02	3	2.609	1092	1322	1341	FALSE	gi|78706474
terribly reduced optic lobes CG33950-PG, isoform G [Drosophila melanogaster]	gi|161077537	459070	0.5	1	1	4	1.87e-05	0.256	FALSE	S_F1.3991.3991.3.dta	SSIcDGNPDcSDASDEQScSLGLK	K	C	0.95	0	0	5.92	2	c4: Carbamidomethyl (+57.02), c10: Carbamidomethyl (+57.02), c19: Carbamidomethyl (+57.02)	868.584	2602.73	2602.03	3	1.703	654.1	1160	1183	FALSE	gi|78706474
terribly reduced optic lobes CG33950-PG, isoform G [Drosophila melanogaster]	gi|161077537	459070	0.5	1	1	4	1.87e-05	0.256	FALSE	S_G2.6576.6576.3.dta	GVYScVAENDHGSDLSSTSIDIEPR	R	E	0.95	0	0	4.24	2	c5: Carbamidomethyl (+57.02)	903.919	2708.73	2708.21	3	1.531	565.1	2744	2768	FALSE	gi|78706474
terribly reduced optic lobes CG33950-PG, isoform G [Drosophila melanogaster]	gi|161077537	459070	0.5	1	1	4	1.87e-05	0.256	FALSE	S_G3.2949.2949.3.dta	cDGENDcGDNSDETScDPEPSGAPcR	R	Y	0.95	0	0	2.85	2	c1: Carbamidomethyl (+57.02), c7: Carbamidomethyl (+57.02), c16: Carbamidomethyl (+57.02), c25: Carbamidomethyl (+57.02), c1: Pyro-cmC (-17.03)	962.175	2883.5	2883.97	3	0.5416	187.8	1203	1228	FALSE	gi|78706474
terribly reduced optic lobes CG33950-PG, isoform G [Drosophila melanogaster]	gi|161077537	459070	0.5	1	1	4	1.87e-05	0.256	FALSE	S_F2.2868.2868.3.dta	cDGENDcGDNSDETScDPEPSGAPcR	R	Y	0.95	0	0	5.66	2	c1: Carbamidomethyl (+57.02), c7: Carbamidomethyl (+57.02), c16: Carbamidomethyl (+57.02), c25: Carbamidomethyl (+57.02), c1: Pyro-cmC (-17.03)	962.28	2883.82	2883.97	3	0.8566	296.9	1203	1228	FALSE	gi|78706474
terribly reduced optic lobes CG33950-PG, isoform G [Drosophila melanogaster]	gi|161077537	459070	0.5	1	1	4	1.87e-05	0.256	FALSE	S_F1.2793.2793.3.dta	cDGENDcGDNSDETScDPEPSGAPcR	R	Y	0.95	0	0	3.18	2	c1: Carbamidomethyl (+57.02), c7: Carbamidomethyl (+57.02), c16: Carbamidomethyl (+57.02), c25: Carbamidomethyl (+57.02), c1: Pyro-cmC (-17.03)	962.328	2883.96	2883.97	3	0.9997	346.5	1203	1228	FALSE	gi|78706474
terribly reduced optic lobes CG33950-PG, isoform G [Drosophila melanogaster]	gi|161077537	459070	0.5	1	1	4	1.87e-05	0.256	FALSE	S_F2.2879.2879.3.dta	cDGENDcGDNSDETScDPEPSGAPcR	R	Y	0.95	0	0	5.62	2	c1: Carbamidomethyl (+57.02), c7: Carbamidomethyl (+57.02), c16: Carbamidomethyl (+57.02), c25: Carbamidomethyl (+57.02), c1: Pyro-cmC (-17.03)	962.623	2884.85	2883.97	3	1.887	653.8	1203	1228	FALSE	gi|78706474
terribly reduced optic lobes CG33950-PG, isoform G [Drosophila melanogaster]	gi|161077537	459070	0.5	1	1	4	1.87e-05	0.256	FALSE	ScaffoldIDNumber_217701_S_F1.1912.1912.3.dta	cDGENDcGDNSDETScDPEPSGAPcR	R	Y	0.95	0	0	6.19	2	c1: Carbamidomethyl (+57.02), c7: Carbamidomethyl (+57.02), c16: Carbamidomethyl (+57.02), c25: Carbamidomethyl (+57.02)	968.283	2901.82	2900.99	3	1.837	633	1203	1228	FALSE	gi|78706474
terribly reduced optic lobes CG33950-PG, isoform G [Drosophila melanogaster]	gi|161077537	459070	0.5	1	1	4	1.87e-05	0.256	FALSE	S_G2.2093.2093.2.dta	cDGENDcGDNSDETScDPEPSGAPcR	R	Y	0.95	0	0	5.47	2	c1: Carbamidomethyl (+57.02), c7: Carbamidomethyl (+57.02), c16: Carbamidomethyl (+57.02), c25: Carbamidomethyl (+57.02)	968.289	1934.56	2900.99	2	-965.4	-498800	1203	1228	FALSE	gi|78706474
terribly reduced optic lobes CG33950-PG, isoform G [Drosophila melanogaster]	gi|161077537	459070	0.5	1	1	4	1.87e-05	0.256	FALSE	S_G3.2200.2200.3.dta	cDGENDcGDNSDETScDPEPSGAPcR	R	Y	0.95	0	0	3.05	2	c1: Carbamidomethyl (+57.02), c7: Carbamidomethyl (+57.02), c16: Carbamidomethyl (+57.02), c25: Carbamidomethyl (+57.02)	968.295	2901.86	2900.99	3	1.874	645.5	1203	1228	FALSE	gi|78706474
terribly reduced optic lobes CG33950-PG, isoform G [Drosophila melanogaster]	gi|161077537	459070	0.5	1	1	4	1.87e-05	0.256	FALSE	S_F1.1921.1921.3.dta	cDGENDcGDNSDETScDPEPSGAPcR	R	Y	0.95	0	0	6.4	2	c1: Carbamidomethyl (+57.02), c7: Carbamidomethyl (+57.02), c16: Carbamidomethyl (+57.02), c25: Carbamidomethyl (+57.02)	968.32	2901.94	2900.99	3	1.95	671.7	1203	1228	FALSE	gi|78706474
terribly reduced optic lobes CG33950-PG, isoform G [Drosophila melanogaster]	gi|161077537	459070	0.5	1	1	4	1.87e-05	0.256	FALSE	S_G1.1928.1928.3.dta	cDGENDcGDNSDETScDPEPSGAPcR	R	Y	0.95	0	0	4.59	2	c1: Carbamidomethyl (+57.02), c7: Carbamidomethyl (+57.02), c16: Carbamidomethyl (+57.02), c25: Carbamidomethyl (+57.02)	968.337	2901.99	2900.99	3	2	688.9	1203	1228	FALSE	gi|78706474
terribly reduced optic lobes CG33950-PG, isoform G [Drosophila melanogaster]	gi|161077537	459070	0.5	1	1	4	1.87e-05	0.256	FALSE	S_F2.2031.2031.2.dta	cDGENDcGDNSDETScDPEPSGAPcR	R	Y	0.95	0	0	3.68	2	c1: Carbamidomethyl (+57.02), c7: Carbamidomethyl (+57.02), c16: Carbamidomethyl (+57.02), c25: Carbamidomethyl (+57.02)	968.589	1935.16	2900.99	2	-964.8	-498300	1203	1228	FALSE	gi|78706474
terribly reduced optic lobes CG33950-PG, isoform G [Drosophila melanogaster]	gi|161077537	459070	0.5	1	1	4	1.87e-05	0.256	FALSE	S_F912.3723.3723.3.dta	NVIGDQcDQcRPGTYGLSAQNQDGcK	R	E	0.95	0	0	6.74	2	c7: Carbamidomethyl (+57.02), c10: Carbamidomethyl (+57.02), c25: Carbamidomethyl (+57.02)	981.601	2941.78	2941.26	3	1.526	518.4	2080	2105	FALSE	gi|78706474
terribly reduced optic lobes CG33950-PG, isoform G [Drosophila melanogaster]	gi|161077537	459070	0.5	1	1	4	1.87e-05	0.256	FALSE	S_F1.3644.3644.3.dta	NVIGDQcDQcRPGTYGLSAQNQDGcK	R	E	0.95	0	0	8.01	2	c7: Carbamidomethyl (+57.02), c10: Carbamidomethyl (+57.02), c25: Carbamidomethyl (+57.02)	981.634	2941.88	2941.26	3	1.622	551.3	2080	2105	FALSE	gi|78706474
terribly reduced optic lobes CG33950-PG, isoform G [Drosophila melanogaster]	gi|161077537	459070	0.5	1	1	4	1.87e-05	0.256	FALSE	ScaffoldIDNumber_236368_S_F2.3728.3728.3.dta	NVIGDQcDQcRPGTYGLSAQNQDGcK	R	E	0.95	0	0	6.12	2	c7: Carbamidomethyl (+57.02), c10: Carbamidomethyl (+57.02), c25: Carbamidomethyl (+57.02)	981.717	2942.13	2941.26	3	1.873	636.2	2080	2105	FALSE	gi|78706474
terribly reduced optic lobes CG33950-PG, isoform G [Drosophila melanogaster]	gi|161077537	459070	0.5	1	1	4	1.87e-05	0.256	FALSE	S_G2.3747.3747.3.dta	NVIGDQcDQcRPGTYGLSAQNQDGcK	R	E	0.95	0	0	5.77	2	c7: Carbamidomethyl (+57.02), c10: Carbamidomethyl (+57.02), c25: Carbamidomethyl (+57.02)	981.739	2942.19	2941.26	3	1.937	658.3	2080	2105	FALSE	gi|78706474
terribly reduced optic lobes CG33950-PG, isoform G [Drosophila melanogaster]	gi|161077537	459070	0.5	1	1	4	1.87e-05	0.256	FALSE	ScaffoldIDNumber_478217_S_G3.3792.3792.3.dta	NVIGDQcDQcRPGTYGLSAQNQDGcK	R	E	0.95	0	0	7.21	2	c7: Carbamidomethyl (+57.02), c10: Carbamidomethyl (+57.02), c25: Carbamidomethyl (+57.02)	981.761	2942.26	2941.26	3	2.005	681.1	2080	2105	FALSE	gi|78706474
terribly reduced optic lobes CG33950-PG, isoform G [Drosophila melanogaster]	gi|161077537	459070	0.5	1	1	4	1.87e-05	0.256	FALSE	ScaffoldIDNumber_22795_S_A11Dros.2462.2462.3.dta	NVIGDQcDQcRPGTYGLSAQNQDGcK	R	E	0.95	0	0	4.96	2	c7: Carbamidomethyl (+57.02), c10: Carbamidomethyl (+57.02), c25: Carbamidomethyl (+57.02)	982.187	2943.54	2941.26	3	3.283	1115	2080	2105	FALSE	gi|78706474
Myosin heavy chain CG17927-PK, isoform K [Drosophila melanogaster]	gi|24584712	221394	0.993	1	1	1	4.68e-06	0.52	FALSE	ScaffoldIDNumber_232755_A9.3759.3759.3.dta	NVQQVTNSIGALcK	R	G	0.95	0	0	2.66	2	c13: Carbamidomethyl (+57.02)	512.02	1533.04	1531.79	3	2.253	1469	415	428	FALSE	gi|24584704,gi|24584700,gi|28574239,gi|24584706,gi|24584710,gi|24584702,gi|24584698
Myosin heavy chain CG17927-PK, isoform K [Drosophila melanogaster]	gi|24584712	221394	0.993	1	1	1	4.68e-06	0.52	FALSE	A9.2859.2859.2.dta	GAYEEGQEQLEAVR	K	R	0.95	0	0	2.6	2		527.581	1053.15	1578.74	2	-524.6	-497600	1485	1498	FALSE	gi|24584704,gi|24584700,gi|28574239,gi|24584706,gi|24584710,gi|24584702,gi|24584698
Myosin heavy chain CG17927-PK, isoform K [Drosophila melanogaster]	gi|24584712	221394	0.993	1	1	1	4.68e-06	0.52	FALSE	S_G2.5267.5267.3.dta	NKDPLNDTVVDQFK	K	K	0.95	0	0	2.7	2		545.629	1633.86	1632.82	3	2.049	1253	597	610	FALSE	gi|24584704,gi|24584700,gi|28574239,gi|24584706,gi|24584710,gi|24584702,gi|24584698
Myosin heavy chain CG17927-PK, isoform K [Drosophila melanogaster]	gi|24584712	221394	0.993	1	1	1	4.68e-06	0.52	FALSE	S_E912.5249.5249.3.dta	NKDPLNDTVVDQFK	K	K	0.95	0	0	2.68	2		545.679	1634.01	1632.82	3	2.198	1344	597	610	FALSE	gi|24584704,gi|24584700,gi|28574239,gi|24584706,gi|24584710,gi|24584702,gi|24584698
Myosin heavy chain CG17927-PK, isoform K [Drosophila melanogaster]	gi|24584712	221394	0.993	1	1	1	4.68e-06	0.52	FALSE	S_F912.4434.4434.2.dta	NKDPLNDTVVDQFKK	K	S	0.95	0	0	2.19	2		588.659	1175.3	1760.92	2	-584.6	-497000	597	611	FALSE	gi|24584704,gi|24584700,gi|28574239,gi|24584706,gi|24584710,gi|24584702,gi|24584698
Myosin heavy chain CG17927-PK, isoform K [Drosophila melanogaster]	gi|24584712	221394	0.993	1	1	1	4.68e-06	0.52	FALSE	S_E912.4747.4747.3.dta	TGEELQAAEDKINHLNK	K	V	0.95	0	0	2.62	2		638.059	1911.15	1909.96	3	2.2	1151	1005	1021	FALSE	gi|24584704,gi|24584700,gi|28574239,gi|24584706,gi|24584710,gi|24584702,gi|24584698
Myosin heavy chain CG17927-PK, isoform K [Drosophila melanogaster]	gi|24584712	221394	0.993	1	1	1	4.68e-06	0.52	FALSE	S_A10Dros.3126.3126.2.dta	DLEEANIQHESTLANLR	R	K	0.95	0	0	2.35	2		652.317	1302.62	1952.97	2	-649.3	-498100	1176	1192	FALSE	gi|24584704,gi|24584700,gi|28574239,gi|24584706,gi|24584710,gi|24584702,gi|24584698
Myosin heavy chain CG17927-PK, isoform K [Drosophila melanogaster]	gi|24584712	221394	0.993	1	1	1	4.68e-06	0.52	FALSE	S_F1.5161.5161.3.dta	DLEEANIQHESTLANLR	R	K	0.95	0	0	2.68	2		652.457	1954.35	1952.97	3	2.387	1221	1176	1192	FALSE	gi|24584704,gi|24584700,gi|28574239,gi|24584706,gi|24584710,gi|24584702,gi|24584698
Myosin heavy chain CG17927-PK, isoform K [Drosophila melanogaster]	gi|24584712	221394	0.993	1	1	1	4.68e-06	0.52	FALSE	S_F912.7643.7643.3.dta	GSLEDQVVQTNPVLEAFGNAK	K	T	0.95	0	0	4.82	2		739.971	2216.89	2216.12	3	1.778	801.8	213	233	FALSE	gi|24584704,gi|24584700,gi|28574239,gi|24584706,gi|24584710,gi|24584702,gi|24584698
Myosin heavy chain CG17927-PK, isoform K [Drosophila melanogaster]	gi|24584712	221394	0.993	1	1	1	4.68e-06	0.52	FALSE	S_F912.7634.7634.3.dta	GSLEDQVVQTNPVLEAFGNAK	K	T	0.95	0	0	4.64	2		740.028	2217.06	2216.12	3	1.948	878	213	233	FALSE	gi|24584704,gi|24584700,gi|28574239,gi|24584706,gi|24584710,gi|24584702,gi|24584698
Myosin heavy chain CG17927-PK, isoform K [Drosophila melanogaster]	gi|24584712	221394	0.993	1	1	1	4.68e-06	0.52	FALSE	S_F911.6843.6843.2.dta	AEDmSNLTYLNDASVLHNLR	K	Q	0.95	0	0	2.85	2	m4: Oxidation (+15.99)	765.203	1528.39	2292.09	2	-762.7	-498700	88	107	FALSE	gi|24584704,gi|24584700,gi|28574239,gi|24584706,gi|24584710,gi|24584702
Myosin heavy chain CG17927-PK, isoform K [Drosophila melanogaster]	gi|24584712	221394	0.993	1	1	1	4.68e-06	0.52	FALSE	S_G2.7333.7333.2.dta	AEDmSNLTYLNDASVLHNLR	K	Q	0.95	0	0	2.26	2	m4: Oxidation (+15.99)	765.238	1528.46	2292.09	2	-762.6	-498600	88	107	FALSE	gi|24584704,gi|24584700,gi|28574239,gi|24584706,gi|24584710,gi|24584702
Myosin heavy chain CG17927-PK, isoform K [Drosophila melanogaster]	gi|24584712	221394	0.993	1	1	1	4.68e-06	0.52	FALSE	ScaffoldIDNumber_109571_S_E8.6831.6831.3.dta	AEDmSNLTYLNDASVLHNLR	K	Q	0.95	0	0	2.62	2	m4: Oxidation (+15.99)	765.381	2293.12	2292.09	3	2.035	887.3	88	107	FALSE	gi|24584704,gi|24584700,gi|28574239,gi|24584706,gi|24584710,gi|24584702
Myosin heavy chain CG17927-PK, isoform K [Drosophila melanogaster]	gi|24584712	221394	0.993	1	1	1	4.68e-06	0.52	FALSE	S_F912.6861.6861.3.dta	AEDmSNLTYLNDASVLHNLR	K	Q	0.95	0	0	2.85	2	m4: Oxidation (+15.99)	765.504	2293.49	2292.09	3	2.402	1047	88	107	FALSE	gi|24584704,gi|24584700,gi|28574239,gi|24584706,gi|24584710,gi|24584702
Myosin heavy chain CG17927-PK, isoform K [Drosophila melanogaster]	gi|24584712	221394	0.993	1	1	1	4.68e-06	0.52	FALSE	S_F912.6853.6853.3.dta	AEDmSNLTYLNDASVLHNLR	K	Q	0.95	0	0	2.85	2	m4: Oxidation (+15.99)	765.794	2294.36	2292.09	3	3.272	1426	88	107	FALSE	gi|24584704,gi|24584700,gi|28574239,gi|24584706,gi|24584710,gi|24584702
Myosin heavy chain CG17927-PK, isoform K [Drosophila melanogaster]	gi|24584712	221394	0.993	1	1	1	4.68e-06	0.52	FALSE	S_E911.7297.7297.3.dta	SKGSLEDQVVQTNPVLEAFGNAK	K	T	0.95	0	0	4.28	2		811.849	2432.52	2431.25	3	2.285	939.1	211	233	FALSE	gi|24584704,gi|24584700,gi|28574239,gi|24584706,gi|24584710,gi|24584702,gi|24584698
Myosin heavy chain CG17927-PK, isoform K [Drosophila melanogaster]	gi|24584712	221394	0.993	1	1	1	4.68e-06	0.52	FALSE	S_F912.6708.6708.3.dta	qAEQELADAHEQLNEVSAQNASISAAK	R	R	0.95	0	0	5.8	2	n-term: Pyro-cmC (-17.03)	946.236	2835.68	2835.34	3	1.353	476.9	1700	1726	FALSE	gi|24584704,gi|24584700,gi|28574239,gi|24584706,gi|24584710,gi|24584702,gi|24584698
Myosin heavy chain CG17927-PK, isoform K [Drosophila melanogaster]	gi|24584712	221394	0.993	1	1	1	4.68e-06	0.52	FALSE	S_E912.6641.6641.3.dta	qAEQELADAHEQLNEVSAQNASISAAK	R	R	0.95	0	0	3.43	2	n-term: Pyro-cmC (-17.03)	946.272	2835.79	2835.34	3	1.461	514.9	1700	1726	FALSE	gi|24584704,gi|24584700,gi|28574239,gi|24584706,gi|24584710,gi|24584702,gi|24584698
Myosin heavy chain CG17927-PK, isoform K [Drosophila melanogaster]	gi|24584712	221394	0.993	1	1	1	4.68e-06	0.52	FALSE	S_F1.6491.6491.3.dta	qAEQELADAHEQLNEVSAQNASISAAK	R	R	0.95	0	0	6	2	n-term: Pyro-cmC (-17.03)	946.409	2836.2	2835.34	3	1.871	659.3	1700	1726	FALSE	gi|24584704,gi|24584700,gi|28574239,gi|24584706,gi|24584710,gi|24584702,gi|24584698
Myosin heavy chain CG17927-PK, isoform K [Drosophila melanogaster]	gi|24584712	221394	0.993	1	1	1	4.68e-06	0.52	FALSE	ScaffoldIDNumber_459769_S_G2.5960.5960.3.dta	QAEQELADAHEQLNEVSAQNASISAAK	R	R	0.95	0	0	3.17	2		951.962	2852.86	2852.37	3	1.505	527.5	1700	1726	FALSE	gi|24584704,gi|24584700,gi|28574239,gi|24584706,gi|24584710,gi|24584702,gi|24584698
Myosin heavy chain CG17927-PK, isoform K [Drosophila melanogaster]	gi|24584712	221394	0.993	1	1	1	4.68e-06	0.52	FALSE	S_F911.5394.5394.3.dta	QAEQELADAHEQLNEVSAQNASISAAK	R	R	0.95	0	0	4.09	2		952.027	2853.06	2852.37	3	1.7	595.7	1700	1726	FALSE	gi|24584704,gi|24584700,gi|28574239,gi|24584706,gi|24584710,gi|24584702,gi|24584698
Myosin heavy chain CG17927-PK, isoform K [Drosophila melanogaster]	gi|24584712	221394	0.993	1	1	1	4.68e-06	0.52	FALSE	S_F912.5838.5838.2.dta	QAEQELADAHEQLNEVSAQNASISAAK	R	R	0.95	0	0	2.8	2		952.159	1902.3	2852.37	2	-949.1	-498600	1700	1726	FALSE	gi|24584704,gi|24584700,gi|28574239,gi|24584706,gi|24584710,gi|24584702,gi|24584698
Myosin heavy chain CG17927-PK, isoform K [Drosophila melanogaster]	gi|24584712	221394	0.993	1	1	1	4.68e-06	0.52	FALSE	S_E9.5132.5132.3.dta	QAEQELADAHEQLNEVSAQNASISAAK	R	R	0.95	0	0	2.64	2		952.182	2853.52	2852.37	3	2.163	757.9	1700	1726	FALSE	gi|24584704,gi|24584700,gi|28574239,gi|24584706,gi|24584710,gi|24584702,gi|24584698
Myosin heavy chain CG17927-PK, isoform K [Drosophila melanogaster]	gi|24584712	221394	0.993	1	1	1	4.68e-06	0.52	FALSE	S_G3.5360.5360.3.dta	QAEQELADAHEQLNEVSAQNASISAAK	R	R	0.95	0	0	5.7	2		952.206	2853.59	2852.37	3	2.236	783.4	1700	1726	FALSE	gi|24584704,gi|24584700,gi|28574239,gi|24584706,gi|24584710,gi|24584702,gi|24584698
Myosin heavy chain CG17927-PK, isoform K [Drosophila melanogaster]	gi|24584712	221394	0.993	1	1	1	4.68e-06	0.52	FALSE	ScaffoldIDNumber_417367_S_F912.5849.5849.3.dta	QAEQELADAHEQLNEVSAQNASISAAK	R	R	0.95	0	0	3.52	2		952.394	2854.16	2852.37	3	2.8	980.8	1700	1726	FALSE	gi|24584704,gi|24584700,gi|28574239,gi|24584706,gi|24584710,gi|24584702,gi|24584698
Myosin heavy chain CG17927-PK, isoform K [Drosophila melanogaster]	gi|24584712	221394	0.993	1	1	1	4.68e-06	0.52	FALSE	S_E911.5143.5143.3.dta	QAEQELADAHEQLNEVSAQNASISAAK	R	R	0.95	0	0	2.62	2		952.41	2854.21	2852.37	3	2.849	998	1700	1726	FALSE	gi|24584704,gi|24584700,gi|28574239,gi|24584706,gi|24584710,gi|24584702,gi|24584698
Myosin heavy chain CG17927-PK, isoform K [Drosophila melanogaster]	gi|24584712	221394	0.993	1	1	1	4.68e-06	0.52	FALSE	S_F912.5269.5269.3.dta	QAEQELADAHEQLNEVSAQNASISAAK	R	R	0.95	0	0	2.96	2		952.428	2854.26	2852.37	3	2.903	1017	1700	1726	FALSE	gi|24584704,gi|24584700,gi|28574239,gi|24584706,gi|24584710,gi|24584702,gi|24584698
Myosin heavy chain CG17927-PK, isoform K [Drosophila melanogaster]	gi|24584712	221394	0.993	1	1	1	4.68e-06	0.52	FALSE	S_E911.4464.4464.3.dta	QAEQELADAHEQLNEVSAQNASISAAK	R	R	0.95	0	0	3.72	2		952.491	2854.45	2852.37	3	3.092	1083	1700	1726	FALSE	gi|24584704,gi|24584700,gi|28574239,gi|24584706,gi|24584710,gi|24584702,gi|24584698
vasa intronic gene CG4170-PA, isoform A [Drosophila melanogaster]	gi|17737419,gi|24584391,gi|24584393,gi|24584395	52690.3	0.998	1	1	14	6.55e-05	0.0469	TRUE	S_F8.2778.2778.3.dta	EAIDDVNKNESETNVTNAEGGAK	K	A	0.95	0	0	2.49	2		803.385	2407.13	2405.11	3	3.033	1260	251	273	TRUE
Tropomyosin 1 CG4898-PL, isoform L [Drosophila melanogaster]	gi|45553375	32481.8	0.5	1	1	1	4.68e-06	0.373	FALSE	S_E8.7634.7634.3.dta	KIQTVENELDQTQEALTLVTGK	K	L	0.95	0	0	4.15	2		820.809	2459.4	2458.3	3	2.108	856.9	49	70	FALSE	gi|24647073,gi|24647075,gi|24647077
Tropomyosin 1 CG4898-PL, isoform L [Drosophila melanogaster]	gi|45553375	32481.8	0.5	1	1	1	4.68e-06	0.373	FALSE	ScaffoldIDNumber_110043_S_E8.7645.7645.3.dta	KIQTVENELDQTQEALTLVTGK	K	L	0.95	0	0	2.89	2		821.234	2460.68	2458.3	3	3.383	1374	49	70	FALSE	gi|24647073,gi|24647075,gi|24647077
Myosin heavy chain CG17927-PD, isoform D [Drosophila melanogaster]	gi|24584702,gi|24584706	224480	0.994	1	1	38	0.000178	0.544	FALSE	ScaffoldIDNumber_232755_A9.3759.3759.3.dta	NVQQVTNSIGALcK	R	G	0.95	0	0	2.66	2	c13: Carbamidomethyl (+57.02)	512.02	1533.04	1531.79	3	2.253	1469	415	428	FALSE	gi|24584704,gi|24584700,gi|28574239,gi|24584710,gi|24584712,gi|24584698
Myosin heavy chain CG17927-PD, isoform D [Drosophila melanogaster]	gi|24584702,gi|24584706	224480	0.994	1	1	38	0.000178	0.544	FALSE	A9.2859.2859.2.dta	GAYEEGQEQLEAVR	K	R	0.95	0	0	2.6	2		527.581	1053.15	1578.74	2	-524.6	-497600	1485	1498	FALSE	gi|24584704,gi|24584700,gi|28574239,gi|24584710,gi|24584712,gi|24584698
Myosin heavy chain CG17927-PD, isoform D [Drosophila melanogaster]	gi|24584702,gi|24584706	224480	0.994	1	1	38	0.000178	0.544	FALSE	S_G2.5267.5267.3.dta	NKDPLNDTVVDQFK	K	K	0.95	0	0	2.7	2		545.629	1633.86	1632.82	3	2.049	1253	597	610	FALSE	gi|24584704,gi|24584700,gi|28574239,gi|24584710,gi|24584712,gi|24584698
Myosin heavy chain CG17927-PD, isoform D [Drosophila melanogaster]	gi|24584702,gi|24584706	224480	0.994	1	1	38	0.000178	0.544	FALSE	S_E912.5249.5249.3.dta	NKDPLNDTVVDQFK	K	K	0.95	0	0	2.68	2		545.679	1634.01	1632.82	3	2.198	1344	597	610	FALSE	gi|24584704,gi|24584700,gi|28574239,gi|24584710,gi|24584712,gi|24584698
Myosin heavy chain CG17927-PD, isoform D [Drosophila melanogaster]	gi|24584702,gi|24584706	224480	0.994	1	1	38	0.000178	0.544	FALSE	S_F912.4434.4434.2.dta	NKDPLNDTVVDQFKK	K	S	0.95	0	0	2.19	2		588.659	1175.3	1760.92	2	-584.6	-497000	597	611	FALSE	gi|24584704,gi|24584700,gi|28574239,gi|24584710,gi|24584712,gi|24584698
Myosin heavy chain CG17927-PD, isoform D [Drosophila melanogaster]	gi|24584702,gi|24584706	224480	0.994	1	1	38	0.000178	0.544	FALSE	S_E912.4747.4747.3.dta	TGEELQAAEDKINHLNK	K	V	0.95	0	0	2.62	2		638.059	1911.15	1909.96	3	2.2	1151	1005	1021	FALSE	gi|24584704,gi|24584700,gi|28574239,gi|24584710,gi|24584712,gi|24584698
Myosin heavy chain CG17927-PD, isoform D [Drosophila melanogaster]	gi|24584702,gi|24584706	224480	0.994	1	1	38	0.000178	0.544	FALSE	S_A10Dros.3126.3126.2.dta	DLEEANIQHESTLANLR	R	K	0.95	0	0	2.35	2		652.317	1302.62	1952.97	2	-649.3	-498100	1176	1192	FALSE	gi|24584704,gi|24584700,gi|28574239,gi|24584710,gi|24584712,gi|24584698
Myosin heavy chain CG17927-PD, isoform D [Drosophila melanogaster]	gi|24584702,gi|24584706	224480	0.994	1	1	38	0.000178	0.544	FALSE	S_F1.5161.5161.3.dta	DLEEANIQHESTLANLR	R	K	0.95	0	0	2.68	2		652.457	1954.35	1952.97	3	2.387	1221	1176	1192	FALSE	gi|24584704,gi|24584700,gi|28574239,gi|24584710,gi|24584712,gi|24584698
Myosin heavy chain CG17927-PD, isoform D [Drosophila melanogaster]	gi|24584702,gi|24584706	224480	0.994	1	1	38	0.000178	0.544	FALSE	S_F912.7643.7643.3.dta	GSLEDQVVQTNPVLEAFGNAK	K	T	0.95	0	0	4.82	2		739.971	2216.89	2216.12	3	1.778	801.8	213	233	FALSE	gi|24584704,gi|24584700,gi|28574239,gi|24584710,gi|24584712,gi|24584698
Myosin heavy chain CG17927-PD, isoform D [Drosophila melanogaster]	gi|24584702,gi|24584706	224480	0.994	1	1	38	0.000178	0.544	FALSE	S_F912.7634.7634.3.dta	GSLEDQVVQTNPVLEAFGNAK	K	T	0.95	0	0	4.64	2		740.028	2217.06	2216.12	3	1.948	878	213	233	FALSE	gi|24584704,gi|24584700,gi|28574239,gi|24584710,gi|24584712,gi|24584698
Myosin heavy chain CG17927-PD, isoform D [Drosophila melanogaster]	gi|24584702,gi|24584706	224480	0.994	1	1	38	0.000178	0.544	FALSE	S_F911.6843.6843.2.dta	AEDmSNLTYLNDASVLHNLR	K	Q	0.95	0	0	2.85	2	m4: Oxidation (+15.99)	765.203	1528.39	2292.09	2	-762.7	-498700	88	107	FALSE	gi|24584704,gi|24584700,gi|28574239,gi|24584710,gi|24584712
Myosin heavy chain CG17927-PD, isoform D [Drosophila melanogaster]	gi|24584702,gi|24584706	224480	0.994	1	1	38	0.000178	0.544	FALSE	S_G2.7333.7333.2.dta	AEDmSNLTYLNDASVLHNLR	K	Q	0.95	0	0	2.26	2	m4: Oxidation (+15.99)	765.238	1528.46	2292.09	2	-762.6	-498600	88	107	FALSE	gi|24584704,gi|24584700,gi|28574239,gi|24584710,gi|24584712
Myosin heavy chain CG17927-PD, isoform D [Drosophila melanogaster]	gi|24584702,gi|24584706	224480	0.994	1	1	38	0.000178	0.544	FALSE	ScaffoldIDNumber_109571_S_E8.6831.6831.3.dta	AEDmSNLTYLNDASVLHNLR	K	Q	0.95	0	0	2.62	2	m4: Oxidation (+15.99)	765.381	2293.12	2292.09	3	2.035	887.3	88	107	FALSE	gi|24584704,gi|24584700,gi|28574239,gi|24584710,gi|24584712
Myosin heavy chain CG17927-PD, isoform D [Drosophila melanogaster]	gi|24584702,gi|24584706	224480	0.994	1	1	38	0.000178	0.544	FALSE	S_F912.6861.6861.3.dta	AEDmSNLTYLNDASVLHNLR	K	Q	0.95	0	0	2.85	2	m4: Oxidation (+15.99)	765.504	2293.49	2292.09	3	2.402	1047	88	107	FALSE	gi|24584704,gi|24584700,gi|28574239,gi|24584710,gi|24584712
Myosin heavy chain CG17927-PD, isoform D [Drosophila melanogaster]	gi|24584702,gi|24584706	224480	0.994	1	1	38	0.000178	0.544	FALSE	S_F912.6853.6853.3.dta	AEDmSNLTYLNDASVLHNLR	K	Q	0.95	0	0	2.85	2	m4: Oxidation (+15.99)	765.794	2294.36	2292.09	3	3.272	1426	88	107	FALSE	gi|24584704,gi|24584700,gi|28574239,gi|24584710,gi|24584712
Myosin heavy chain CG17927-PD, isoform D [Drosophila melanogaster]	gi|24584702,gi|24584706	224480	0.994	1	1	38	0.000178	0.544	FALSE	S_E911.7297.7297.3.dta	SKGSLEDQVVQTNPVLEAFGNAK	K	T	0.95	0	0	4.28	2		811.849	2432.52	2431.25	3	2.285	939.1	211	233	FALSE	gi|24584704,gi|24584700,gi|28574239,gi|24584710,gi|24584712,gi|24584698
Myosin heavy chain CG17927-PD, isoform D [Drosophila melanogaster]	gi|24584702,gi|24584706	224480	0.994	1	1	38	0.000178	0.544	FALSE	S_F912.6708.6708.3.dta	qAEQELADAHEQLNEVSAQNASISAAK	R	R	0.95	0	0	5.8	2	n-term: Pyro-cmC (-17.03)	946.236	2835.68	2835.34	3	1.353	476.9	1700	1726	FALSE	gi|24584704,gi|24584700,gi|28574239,gi|24584710,gi|24584712,gi|24584698
Myosin heavy chain CG17927-PD, isoform D [Drosophila melanogaster]	gi|24584702,gi|24584706	224480	0.994	1	1	38	0.000178	0.544	FALSE	S_E912.6641.6641.3.dta	qAEQELADAHEQLNEVSAQNASISAAK	R	R	0.95	0	0	3.43	2	n-term: Pyro-cmC (-17.03)	946.272	2835.79	2835.34	3	1.461	514.9	1700	1726	FALSE	gi|24584704,gi|24584700,gi|28574239,gi|24584710,gi|24584712,gi|24584698
Myosin heavy chain CG17927-PD, isoform D [Drosophila melanogaster]	gi|24584702,gi|24584706	224480	0.994	1	1	38	0.000178	0.544	FALSE	S_F1.6491.6491.3.dta	qAEQELADAHEQLNEVSAQNASISAAK	R	R	0.95	0	0	6	2	n-term: Pyro-cmC (-17.03)	946.409	2836.2	2835.34	3	1.871	659.3	1700	1726	FALSE	gi|24584704,gi|24584700,gi|28574239,gi|24584710,gi|24584712,gi|24584698
Myosin heavy chain CG17927-PD, isoform D [Drosophila melanogaster]	gi|24584702,gi|24584706	224480	0.994	1	1	38	0.000178	0.544	FALSE	ScaffoldIDNumber_459769_S_G2.5960.5960.3.dta	QAEQELADAHEQLNEVSAQNASISAAK	R	R	0.95	0	0	3.17	2		951.962	2852.86	2852.37	3	1.505	527.5	1700	1726	FALSE	gi|24584704,gi|24584700,gi|28574239,gi|24584710,gi|24584712,gi|24584698
Myosin heavy chain CG17927-PD, isoform D [Drosophila melanogaster]	gi|24584702,gi|24584706	224480	0.994	1	1	38	0.000178	0.544	FALSE	S_F911.5394.5394.3.dta	QAEQELADAHEQLNEVSAQNASISAAK	R	R	0.95	0	0	4.09	2		952.027	2853.06	2852.37	3	1.7	595.7	1700	1726	FALSE	gi|24584704,gi|24584700,gi|28574239,gi|24584710,gi|24584712,gi|24584698
Myosin heavy chain CG17927-PD, isoform D [Drosophila melanogaster]	gi|24584702,gi|24584706	224480	0.994	1	1	38	0.000178	0.544	FALSE	S_F912.5838.5838.2.dta	QAEQELADAHEQLNEVSAQNASISAAK	R	R	0.95	0	0	2.8	2		952.159	1902.3	2852.37	2	-949.1	-498600	1700	1726	FALSE	gi|24584704,gi|24584700,gi|28574239,gi|24584710,gi|24584712,gi|24584698
Myosin heavy chain CG17927-PD, isoform D [Drosophila melanogaster]	gi|24584702,gi|24584706	224480	0.994	1	1	38	0.000178	0.544	FALSE	S_E9.5132.5132.3.dta	QAEQELADAHEQLNEVSAQNASISAAK	R	R	0.95	0	0	2.64	2		952.182	2853.52	2852.37	3	2.163	757.9	1700	1726	FALSE	gi|24584704,gi|24584700,gi|28574239,gi|24584710,gi|24584712,gi|24584698
Myosin heavy chain CG17927-PD, isoform D [Drosophila melanogaster]	gi|24584702,gi|24584706	224480	0.994	1	1	38	0.000178	0.544	FALSE	S_G3.5360.5360.3.dta	QAEQELADAHEQLNEVSAQNASISAAK	R	R	0.95	0	0	5.7	2		952.206	2853.59	2852.37	3	2.236	783.4	1700	1726	FALSE	gi|24584704,gi|24584700,gi|28574239,gi|24584710,gi|24584712,gi|24584698
Myosin heavy chain CG17927-PD, isoform D [Drosophila melanogaster]	gi|24584702,gi|24584706	224480	0.994	1	1	38	0.000178	0.544	FALSE	ScaffoldIDNumber_417367_S_F912.5849.5849.3.dta	QAEQELADAHEQLNEVSAQNASISAAK	R	R	0.95	0	0	3.52	2		952.394	2854.16	2852.37	3	2.8	980.8	1700	1726	FALSE	gi|24584704,gi|24584700,gi|28574239,gi|24584710,gi|24584712,gi|24584698
Myosin heavy chain CG17927-PD, isoform D [Drosophila melanogaster]	gi|24584702,gi|24584706	224480	0.994	1	1	38	0.000178	0.544	FALSE	S_E911.5143.5143.3.dta	QAEQELADAHEQLNEVSAQNASISAAK	R	R	0.95	0	0	2.62	2		952.41	2854.21	2852.37	3	2.849	998	1700	1726	FALSE	gi|24584704,gi|24584700,gi|28574239,gi|24584710,gi|24584712,gi|24584698
Myosin heavy chain CG17927-PD, isoform D [Drosophila melanogaster]	gi|24584702,gi|24584706	224480	0.994	1	1	38	0.000178	0.544	FALSE	S_F912.5269.5269.3.dta	QAEQELADAHEQLNEVSAQNASISAAK	R	R	0.95	0	0	2.96	2		952.428	2854.26	2852.37	3	2.903	1017	1700	1726	FALSE	gi|24584704,gi|24584700,gi|28574239,gi|24584710,gi|24584712,gi|24584698
Myosin heavy chain CG17927-PD, isoform D [Drosophila melanogaster]	gi|24584702,gi|24584706	224480	0.994	1	1	38	0.000178	0.544	FALSE	S_E911.4464.4464.3.dta	QAEQELADAHEQLNEVSAQNASISAAK	R	R	0.95	0	0	3.72	2		952.491	2854.45	2852.37	3	3.092	1083	1700	1726	FALSE	gi|24584704,gi|24584700,gi|28574239,gi|24584710,gi|24584712,gi|24584698
Syndecan CG10497-PA, isoform A [Drosophila melanogaster]	gi|17136884	42070.8	0.993	1	2	12	5.61e-05	0.0652	TRUE	ScaffoldIDNumber_393627_S_F911.2739.2739.3.dta	GPGAGGSNVHELDPNTNVNSQPSDTK	R	G	0.95	0	0	4.85	2		865.431	2593.27	2592.19	3	2.085	803.5	286	311	TRUE
Syndecan CG10497-PA, isoform A [Drosophila melanogaster]	gi|17136884	42070.8	0.993	1	2	12	5.61e-05	0.0652	TRUE	S_E7.2675.2675.3.dta	GPGAGGSNVHELDPNTNVNSQPSDTK	R	G	0.95	0	0	3.32	2		865.437	2593.29	2592.19	3	2.102	810.1	286	311	TRUE
Syndecan CG10497-PA, isoform A [Drosophila melanogaster]	gi|17136884	42070.8	0.993	1	2	12	5.61e-05	0.0652	TRUE	S_E911.2634.2634.2.dta	GPGAGGSNVHELDPNTNVNSQPSDTK	R	G	0.95	0	0	5.54	2		865.452	1728.89	2592.19	2	-862.3	-498500	286	311	TRUE
Syndecan CG10497-PA, isoform A [Drosophila melanogaster]	gi|17136884	42070.8	0.993	1	2	12	5.61e-05	0.0652	TRUE	ScaffoldIDNumber_311652_S_F7.2691.2691.3.dta	GPGAGGSNVHELDPNTNVNSQPSDTK	R	G	0.95	0	0	4.36	2		865.495	2593.46	2592.19	3	2.278	877.9	286	311	TRUE
SF2 CG6987-PA [Drosophila melanogaster]	gi|21358097	28332.8	1	2	2	2	9.36e-06	0.098	TRUE	S_A7Dros.3931.3931.3.dta	GGGGGGSGGGGGGSGGGGSR	R	D	0.95	8.29	36.9	3.06	2		450.034	1347.08	1348.56	3	-0.4739	-351.5	196	215	TRUE
CG6543 CG6543-PA, isoform A [Drosophila melanogaster]	gi|20129971,gi|24653477	31564.8	1	8	9	97	0.000454	0.346	TRUE	S_E7.6518.6518.3.dta	FGQPEIALGTIPGAGGTQR	K	L	0.95	14.4	36.4	2.21	2		623.872	1868.59	1869.98	3	-0.3822	-204.4	165	183	TRUE
Aldehyde dehydrogenase CG3752-PA [Drosophila melanogaster]	gi|20129399	57002	1	16	20	178	0.000833	0.34	TRUE	S_E9.5672.5672.3.dta	TVGNPFDLNTEQGPQVNEEQmEK	R	I	0.95	17.3	36	1.89	2	m21: Oxidation (+15.99)	874.399	2620.17	2620.18	3	0.9975	380.6	349	371	TRUE
Papilin CG33103-PA, isoform A [Drosophila melanogaster]	gi|28572036	312636	1	51	58	438	0.00205	0.228	TRUE	S_F2.3946.3946.3.dta	KScSFSEFGccPDAETSAK	K	G	0.95	17.8	36.2	4.68	2	c3: Carbamidomethyl (+57.02), c10: Carbamidomethyl (+57.02), c11: Carbamidomethyl (+57.02)	723.187	2166.54	2167.87	3	-0.329	-151.8	1368	1386	TRUE
refractory to sigma P CG10360-PA, isoform A [Drosophila melanogaster]	gi|17136432,gi|62471647	65284.8	0.998	2	2	16	7.49e-05	0.0634	TRUE	S_F8.2688.2688.3.dta	GHcPFQETNQADPAGEPAR	R	D	0.95	18.4	36.3	2	2	c3: Carbamidomethyl (+57.02)	694.404	2080.19	2081.91	3	-0.7137	-342.9	196	214	TRUE
CDP diglyceride synthetase CG7962-PA [Drosophila melanogaster]	gi|17864222	51496	0.998	2	3	8	3.74e-05	0.0694	TRUE	S_E9.3060.3060.3.dta	KGEDEPLEDTAISGSDAANKR	R	N	0.95	18.4	36.2	1.82	2		735.394	2203.16	2203.05	3	1.119	507.9	8	28	TRUE
uninitiated CG4008-PA [Drosophila melanogaster]	gi|17137568	49788.2	0.998	2	2	7	3.28e-05	0.0848	TRUE	S_F910.2761.2761.3.dta	IASGEGGDEELTTNGDAKPATPAAQPAK	K	K	0.95	18.5	35.6	3.16	2		899.789	2696.34	2696.3	3	1.051	389.5	41	68	TRUE
sallimus CG1915-PC, isoform C [Drosophila melanogaster]	gi|161080703	2.06604e+06	1	83	86	363	0.0017	0.0614	TRUE	S_F1.3724.3724.3.dta	VVSEASIQmDTQHPDSISR	R	I	0.95	19.5	36.3	1.8	2	m9: Oxidation (+15.99)	706.367	2116.08	2116	3	1.086	513	2448	2466	TRUE
innexin 2 CG4590-PA, isoform A [Drosophila melanogaster]	gi|18858897,gi|24640280	42471.4	1	5	6	10	4.68e-05	0.174	TRUE	S_E8.2999.2999.3.dta	DVVQPGVGSHVEGEDEVK	R	Y	0.95	20.3	36.3	1.66	2		627.471	1879.39	1879.9	3	0.4944	262.9	87	104	TRUE
Aldehyde dehydrogenase CG3752-PA [Drosophila melanogaster]	gi|20129399	57002	1	16	20	178	0.000833	0.34	TRUE	S_E9.7471.7471.3.dta	EAGFPEGVVNVVPGFGTAGAALANHcDVDK	K	V	0.95	20.9	35.4	1.33	2	c26: Carbamidomethyl (+57.02)	1000.59	2998.73	2998.44	3	1.304	434.6	230	259	TRUE
His1:CG31617 CG31617-PA [Drosophila melanogaster]	gi|24585669,gi|78706962,gi|78706970,gi|78706980,gi|78706988,gi|78706998,gi|78707008,gi|78707018,gi|78707028,gi|78707038,gi|78707048,gi|78707068,gi|78707078,gi|78707088,gi|78707098,gi|78707108,gi|78707118,gi|78707128,gi|78707138,gi|78707148,gi|78707158	26342.4	1	4	5	23	0.000108	0.152	TRUE	S_E8.3473.3473.3.dta	ASGSAGTKAKKASATPSHPPTQQMVDASIK	K	N	0.95	20.9	35.6	1.82	2		984.349	2950.02	2952.52	3	-1.489	-504.6	29	58	TRUE
CG6206 CG6206-PA, isoform A [Drosophila melanogaster]	gi|19921088	122670	1	16	18	68	0.000318	0.181	TRUE	S_F910.5783.5783.3.dta	FEHIMENGEDASYSQPVQFNVK	R	N	0.95	21.2	36	3.8	2		857.28	2568.82	2569.17	3	0.6566	255.5	921	942	TRUE
CG11963 CG11963-PB, isoform B [Drosophila melanogaster]	gi|161078106,gi|24645208	54791.9	1	12	12	179	0.000837	0.259	TRUE	S_E7.4147.4147.3.dta	NGLKGGVRVVYDPQTAEELSSK	K	M	0.95	21.5	36.1	2.12	2		783.16	2346.46	2347.23	3	0.2385	101.6	98	119	TRUE
CG3415 CG3415-PA [Drosophila melanogaster]	gi|18859837	64056.3	1	16	18	76	0.000356	0.328	TRUE	S_E910.4727.4727.3.dta	KDPIAGVVPLQPAPNR	K	Q	0.95	21.9	36.6	2.77	2		558.36	1672.06	1671.95	3	1.11	663.2	458	473	TRUE
Thiolase CG4581-PA [Drosophila melanogaster]	gi|17137578	50624.7	1	7	8	55	0.000257	0.166	TRUE	S_F8.3910.3910.3.dta	VSGVDQIVDKDNGIR	K	V	0.95	22	36.7	1.66	2		538.869	1613.58	1614.85	3	-0.2548	-157.8	259	273	TRUE
Muscle-specific protein 300 CG33715-PD, isoform D [Drosophila melanogaster]	gi|161076705	1.40526e+06	1	45	45	109	0.00051	0.0478	TRUE	S_F910.2732.2732.3.dta	AVSSDDKIDTAPASQQmQQLNER	K	F	0.95	22.1	35.9	1.52	2	m17: Oxidation (+15.99)	850.472	2548.39	2548.2	3	1.205	472.8	1465	1487	TRUE
Paramyosin CG5939-PA, isoform A [Drosophila melanogaster]	gi|24661112,gi|24661116	102322	1	39	51	578	0.0027	0.494	TRUE	S_E7.2873.2873.3.dta	RLENERDELTAAYK	R	E	0.95	22.3	36.6	1.35	2		570.447	1708.32	1707.87	3	1.458	852.9	461	474	TRUE
fau CG6544-PC, isoform C [Drosophila melanogaster]	gi|24645757	14353.4	1	5	6	39	0.000182	0.573	TRUE	S_F5.3488.3488.3.dta	TYSSRPVTTSYAVTTPR	R	L	0.95	22.4	36.5	1.44	2		629.748	1886.22	1886.96	3	0.2664	141.2	12	28	TRUE
CG11963 CG11963-PB, isoform B [Drosophila melanogaster]	gi|161078106,gi|24645208	54791.9	1	12	12	179	0.000837	0.259	TRUE	S_E7.4180.4180.3.dta	NGLKGGVRVVYDPQTAEELSSK	K	M	0.95	22.5	36.1	2.11	2		783.246	2346.71	2347.23	3	0.4965	211.5	98	119	TRUE
bent CG32019-PA, isoform A [Drosophila melanogaster]	gi|28558739,gi|45552153	1.00129e+06	1	118	128	787	0.00368	0.191	TRUE	S_E912.2752.2752.3.dta	DPYSHPDKPGQPQATDWGK	K	H	0.95	22.6	36.2	1.8	2		709.102	2124.28	2123.98	3	1.313	617.6	5475	5493	TRUE
bent CG32019-PA, isoform A [Drosophila melanogaster]	gi|28558739,gi|45552153	1.00129e+06	1	118	128	787	0.00368	0.191	TRUE	S_F911.2964.2964.3.dta	GGPSDPSDPSSTIIcKPR	R	F	0.95	23	36.4	1.52	2	c15: Carbamidomethyl (+57.02)	624.794	1871.36	1870.9	3	1.468	784.2	5559	5576	TRUE
bent CG32019-PA, isoform A [Drosophila melanogaster]	gi|28558739,gi|45552153	1.00129e+06	1	118	128	787	0.00368	0.191	TRUE	S_E9.2840.2840.3.dta	AINAAGPGEPSDASKPIITKPR	K	K	0.95	23	36.1	1.72	2		730.813	2189.41	2190.19	3	0.234	106.8	4375	4396	TRUE
bent CG32019-PA, isoform A [Drosophila melanogaster]	gi|28558739,gi|45552153	1.00129e+06	1	118	128	787	0.00368	0.191	TRUE	S_F911.2907.2907.3.dta	AINAAGPGEPSDASKPIITKPR	K	K	0.95	23.4	36	1.52	2		731.019	2190.03	2190.19	3	0.8529	389.3	4375	4396	TRUE
CG30084 CG30084-PF, isoform F [Drosophila melanogaster]	gi|161077121,gi|78709100	238039	1	12	13	100	0.000468	0.0702	TRUE	S_G3.5115.5115.3.dta	QAAINNPPTGTEGYVPVPIKPNTK	K	L	0.95	23.5	36	1.8	2		836.187	2505.54	2506.33	3	0.2137	85.26	335	358	TRUE	gi|78707228,gi|116007706
CG30084 CG30084-PG, isoform G [Drosophila melanogaster]	gi|116007706,gi|78707228	95990.3	0.5	1	1	1	4.68e-06	0.182	FALSE	S_G3.5115.5115.3.dta	QAAINNPPTGTEGYVPVPIKPNTK	K	L	0.95	23.5	36	1.8	2		836.187	2505.54	2506.33	3	0.2137	85.26	393	416	FALSE	gi|78709100,gi|161077121
CG6643 CG6643-PA, isoform A [Drosophila melanogaster]	gi|24649705,gi|45552026	90849.8	1	6	6	10	4.68e-05	0.104	TRUE	S_F911.3221.3221.3.dta	SSSKPDPYLVcSVNK	R	Q	0.95	23.7	36.5	2.6	2	c11: Carbamidomethyl (+57.02)	561.252	1680.73	1680.83	3	0.9146	543.9	479	493	TRUE
Calcium ATPase at 60A CG3725-PA, isoform A [Drosophila melanogaster]	gi|17136664,gi|24762445,gi|24762447,gi|24762449,gi|24762451,gi|24762453,gi|24762455,gi|24762457	109596	1	34	42	581	0.00272	0.346	TRUE	S_G1.5602.5602.3.dta	cLALAVADSPmKPDEMDLGDSTK	R	F	0.95	24	36.1	1.49	2	c1: Carbamidomethyl (+57.02), m11: Oxidation (+15.99)	827.319	2478.93	2480.14	3	-0.1949	-78.58	561	583	TRUE
Cytochrome P450-4g1 CG3972-PA [Drosophila melanogaster]	gi|17933498	62954.7	1	24	31	601	0.00281	0.39	TRUE	S_E911.4764.4764.3.dta	SFVPTFVDHSK	K	A	0.95	24	36.6	1.34	2		421.947	1262.82	1263.64	3	0.1893	149.8	166	176	TRUE
CG11963 CG11963-PB, isoform B [Drosophila melanogaster]	gi|161078106,gi|24645208	54791.9	1	12	12	179	0.000837	0.259	TRUE	S_A2Dros.2814.2814.3.dta	NGLKGGVRVVYDPQTAEELSSK	K	M	0.95	24	36.2	1.46	2		783.244	2346.71	2347.23	3	0.4905	208.9	98	119	TRUE
CG10932 CG10932-PA [Drosophila melanogaster]	gi|24640423	43452	1	4	4	18	8.42e-05	0.139	TRUE	S_E8.2715.2715.3.dta	RKPEIVISEDEEYKR	K	V	0.95	24	36.4	2.92	2		631.488	1891.44	1890.99	3	1.455	768.8	227	241	TRUE
pericardin CG5700-PB [Drosophila melanogaster]	gi|24663043	163475	1	14	18	215	0.00101	0.114	TRUE	A7.2019.2019.3.dta	ASSQSGGIIQQSQSEVHANDK	K	G	0.95	24.1	36.2	2.6	2		724.6	2170.78	2171.03	3	0.7515	346	1336	1356	TRUE
CG1309 CG1309-PA [Drosophila melanogaster]	gi|21355871	58386.7	0.5	1	2	6	2.81e-05	0.0324	TRUE	S_A10Dros.2256.2256.3.dta	RTEDEIIAEDNHIDTNR	R	G	0.95	24.1	36.3	1.47	2		681.473	2041.4	2040.96	3	1.445	707.7	391	407	TRUE
Paramyosin CG5939-PA, isoform A [Drosophila melanogaster]	gi|24661112,gi|24661116	102322	1	39	51	578	0.0027	0.494	TRUE	S_G1.2819.2819.3.dta	RLENERDELTAAYK	R	E	0.95	24.2	36.6	1.59	2		570.028	1707.06	1707.87	3	0.2009	117.6	461	474	TRUE
CG7920 CG7920-PA, isoform A [Drosophila melanogaster]	gi|21358615	51836.5	1	10	12	100	0.000468	0.262	TRUE	S_F7.4206.4206.3.dta	EPPIVKPEEAVAcVK	R	S	0.95	24.4	36.2	1.92	2	c13: Carbamidomethyl (+57.02)	556.377	1666.11	1665.89	3	1.228	736.4	45	59	TRUE
bent CG32019-PA, isoform A [Drosophila melanogaster]	gi|28558739,gi|45552153	1.00129e+06	1	118	128	787	0.00368	0.191	TRUE	S_F912.5317.5317.3.dta	SDGPEYNVDGLVPGHDYK	R	F	0.95	24.5	36.2	2.25	2		654.475	1960.4	1961.89	3	-0.4777	-243.5	4547	4564	TRUE
Cytochrome P450-4g1 CG3972-PA [Drosophila melanogaster]	gi|17933498	62954.7	1	24	31	601	0.00281	0.39	TRUE	S_F912.4919.4919.3.dta	SFVPTFVDHSK	K	A	0.95	24.7	36.6	1.92	2		421.864	1262.57	1263.64	3	-0.0597	-47.25	166	176	TRUE
terribly reduced optic lobes CG33950-PF, isoform F [Drosophila melanogaster]	gi|78706474	513388	1	89	107	871	0.00408	0.237	TRUE	S_A9Dros.1177.1177.3.dta	mLHSGETRPTSK	R	K	0.95	24.9	36.9	1.35	2	m1: Oxidation (+15.99)	453.917	1358.73	1359.67	3	0.06629	48.75	4544	4555	TRUE	gi|161077537
Eukaryotic initiation factor 4E CG4035-PB, isoform B [Drosophila melanogaster]	gi|17864468,gi|24661542,gi|24661546,gi|24661553,gi|24661557,gi|24661561,gi|24661565	29206.7	0.998	2	3	21	9.83e-05	0.193	TRUE	S_E910.2139.2139.3.dta	TSAPSTEQGRPEPPTSAAAPAEAK	K	D	0.95	24.9	36.2	2.14	2		784.732	2351.17	2351.15	3	1.031	438.4	20	43	TRUE
terribly reduced optic lobes CG33950-PG, isoform G [Drosophila melanogaster]	gi|161077537	459070	0.5	1	1	4	1.87e-05	0.256	FALSE	S_A9Dros.1177.1177.3.dta	mLHSGETRPTSK	R	K	0.95	24.9	36.9	1.35	2	m1: Oxidation (+15.99)	453.917	1358.73	1359.67	3	0.06629	48.75	4071	4082	FALSE	gi|78706474
CG4389 CG4389-PB, isoform B [Drosophila melanogaster]	gi|24583077,gi|24583079	79622	1	27	31	210	0.000983	0.423	TRUE	S_F6.4155.4155.3.dta	TAVQVANDLASGKLRVNR	K	E	0.95	25	36.3	1.51	2		637.837	1910.49	1912.07	3	-0.5762	-301.4	215	232	TRUE
CG6643 CG6643-PA, isoform A [Drosophila melanogaster]	gi|24649705,gi|45552026	90849.8	1	6	6	10	4.68e-05	0.104	TRUE	S_E910.4487.4487.3.dta	ESQASSKRLSAESPISEEDPVAATK	K	I	0.95	25	36	1.59	2		872.927	2615.76	2617.3	3	-0.5291	-202.2	620	644	TRUE
Cytochrome P450-4g1 CG3972-PA [Drosophila melanogaster]	gi|17933498	62954.7	1	24	31	601	0.00281	0.39	TRUE	S_F9.3552.3552.3.dta	NYIVHSTDTEADFK	R	L	0.95	25.1	36.5	1.68	2		547.317	1638.93	1639.76	3	0.175	106.7	517	530	TRUE
CG11665 CG11665-PA [Drosophila melanogaster]	gi|24585866	71758.5	1	2	2	2	9.36e-06	0.0745	TRUE	S_E5.644.644.3.dta	GLANGLcISGSALGSIILPPLLR	R	W	0.95	25.1	35.8	1.85	2	c7: Carbamidomethyl (+57.02)	765.095	2292.26	2292.31	3	0.9577	417.6	180	202	TRUE
Cytochrome P450-4g1 CG3972-PA [Drosophila melanogaster]	gi|17933498	62954.7	1	24	31	601	0.00281	0.39	TRUE	S_F7.3541.3541.3.dta	NYIVHSTDTEADFK	R	L	0.95	25.3	36.5	2.09	2		547.281	1638.82	1639.76	3	0.06611	40.31	517	530	TRUE
CG11963 CG11963-PB, isoform B [Drosophila melanogaster]	gi|161078106,gi|24645208	54791.9	1	12	12	179	0.000837	0.259	TRUE	A9.2980.2980.3.dta	NGLKGGVRVVYDPQTAEELSSK	K	M	0.95	25.5	36.1	1.92	2		783.269	2346.78	2347.23	3	0.5646	240.5	98	119	TRUE
Ribosomal protein S16 CG4046-PA [Drosophila melanogaster]	gi|19922746	16756.9	1	8	8	48	0.000225	0.439	TRUE	S_F5.3422.3422.3.dta	VNGRPLEQIEPK	K	V	0.95	25.5	36.4	2.28	2		460.909	1379.7	1379.76	3	0.9466	685.6	36	47	TRUE
Ribosomal protein LP1 CG4087-PA [Drosophila melanogaster]	gi|17136320	11495.2	1	3	4	15	7.02e-05	0.411	TRUE	S_A3Dros.3333.3333.3.dta	DLITNIGSGVGAAPAGGAAPAAAAAAPAAESK	K	K	0.95	25.5	35.8	2.8	2		907.203	2718.58	2718.41	3	1.186	436.1	58	89	TRUE
Arginine methyltransferase 1 CG6554-PA [Drosophila melanogaster]	gi|21356361	42788	0.5	1	1	2	9.36e-06	0.0585	TRUE	S_F910.2562.2562.3.dta	KLPAEGSTGDNPNANADEMTSR	K	D	0.95	25.5	36.1	1.72	2		758.9	2273.68	2275.03	3	-0.3427	-150.7	32	53	TRUE
Papilin CG33103-PA, isoform A [Drosophila melanogaster]	gi|28572036	312636	1	51	58	438	0.00205	0.228	TRUE	A10.3679.3679.3.dta	GVDVcNEPVTTGPcTDWQTK	K	Y	0.95	25.7	36.1	1.92	2	c5: Carbamidomethyl (+57.02), c14: Carbamidomethyl (+57.02)	755.315	2262.92	2264	3	-0.06632	-29.3	2249	2268	TRUE
CG13865 CG13865-PA, isoform A [Drosophila melanogaster]	gi|116007256	29622.5	1	4	4	9	4.21e-05	0.184	TRUE	S_F8.2354.2354.3.dta	KADQSAVTASSGSGTSSPPAGQPPLK	K	D	0.95	25.7	36	1.68	2		809.513	2425.52	2426.22	3	0.3069	126.5	161	186	TRUE
Lamin C CG10119-PA [Drosophila melanogaster]	gi|24653664	69843.7	1	17	18	59	0.000276	0.33	TRUE	S_F5.3725.3725.3.dta	SVLANADKEDVASYDR	R	V	0.95	25.9	36.4	1.33	2		585.296	1752.87	1752.84	3	1.033	588.9	565	580	TRUE
Paramyosin CG5939-PA, isoform A [Drosophila melanogaster]	gi|24661112,gi|24661116	102322	1	39	51	578	0.0027	0.494	TRUE	S_F912.6917.6917.3.dta	LEQELSVVASDYEEVSK	K	E	0.95	26.3	36.3	1.29	2		642.41	1924.21	1924.94	3	0.2765	143.6	660	676	TRUE	gi|24661124,gi|24661120
CG7356 CG7356-PB, isoform B [Drosophila melanogaster]	gi|24582659	86840.8	1	9	9	19	8.89e-05	0.145	TRUE	A10.4367.4367.3.dta	LENPLPIPLHK	R	G	0.95	26.3	36.7	1.74	2		424.712	1271.11	1270.75	3	1.369	1076	667	677	TRUE
Alcohol dehydrogenase CG3481-PC, isoform C [Drosophila melanogaster]	gi|78706922,gi|78706924,gi|78706926,gi|78706928,gi|78706930	27716.8	1	5	8	24	0.000112	0.277	TRUE	S_F8.6008.6008.3.dta	LLAHPTQPSLAcAENFVK	K	A	0.95	26.3	36.3	1.68	2	c12: Carbamidomethyl (+57.02)	665.884	1994.63	1996.03	3	-0.3963	-198.6	208	225	TRUE
Paramyosin CG5939-PC, isoform C [Drosophila melanogaster]	gi|24661120,gi|24661124	74260.8	0.998	2	3	11	5.15e-05	0.375	FALSE	S_F912.6917.6917.3.dta	LEQELSVVASDYEEVSK	K	E	0.95	26.3	36.3	1.29	2		642.41	1924.21	1924.94	3	0.2765	143.6	421	437	FALSE	gi|24661116,gi|24661112
terribly reduced optic lobes CG33950-PF, isoform F [Drosophila melanogaster]	gi|78706474	513388	1	89	107	871	0.00408	0.237	TRUE	S_A8Dros.2915.2915.3.dta	NFFHSNYEGNDDEEQEIR	R	S	0.95	26.5	36.1	1.85	2		748.751	2243.23	2242.93	3	1.311	584.1	261	278	TRUE
Aconitase CG9244-PB, isoform B [Drosophila melanogaster]	gi|17864292	85383.5	1	27	37	473	0.00221	0.417	TRUE	S_E6.2865.2865.3.dta	SLAPGKPVDAEIK	K	N	0.95	26.5	36.3	1.39	2		442.229	1323.66	1324.75	3	-0.07641	-57.68	739	751	TRUE
CG7470 CG7470-PA [Drosophila melanogaster]	gi|21357643	84075.9	1	12	16	101	0.000473	0.21	TRUE	S_F912.5477.5477.3.dta	IAQVLVTKPDFYNEETR	K	N	0.95	26.6	36.1	2.41	2		675.16	2022.46	2023.05	3	0.4155	205.3	168	184	TRUE
Imaginal disc growth factor 2 CG4475-PA [Drosophila melanogaster]	gi|19549546	49142.7	1	2	2	5	2.34e-05	0.0818	TRUE	S_F910.3530.3530.3.dta	NPEEADYSAPIYHPDGSK	R	D	0.95	26.6	36.4	1.6	2		664.085	1989.23	1989.88	3	0.3572	179.5	250	267	TRUE
Rab-protein 1 CG3320-PA, isoform A [Drosophila melanogaster]	gi|24648682	22745.2	1	6	7	16	7.49e-05	0.346	TRUE	S_E6.6344.6344.3.dta	SATNVEQAFmTmAAEIK	K	N	0.95	26.7	36.5	1.85	2	m10: Oxidation (+15.99), m12: Oxidation (+15.99)	625.758	1874.25	1873.87	3	1.392	742.3	157	173	TRUE
Calcium ATPase at 60A CG3725-PA, isoform A [Drosophila melanogaster]	gi|17136664,gi|24762445,gi|24762447,gi|24762449,gi|24762451,gi|24762453,gi|24762455,gi|24762457	109596	1	34	42	581	0.00272	0.346	TRUE	S_F1.4751.4751.3.dta	cLALAVADSPmKPDEmDLGDSTK	R	F	0.95	26.8	36	2.57	2	c1: Carbamidomethyl (+57.02), m11: Oxidation (+15.99), m16: Oxidation (+15.99)	832.621	2494.84	2496.13	3	-0.2838	-113.7	561	583	TRUE
Proteasome 35kD subunit CG4904-PA [Drosophila melanogaster]	gi|17737405	31041.5	1	4	5	12	5.61e-05	0.208	TRUE	S_A6Dros.1807.1807.3.dta	NDDDDDRPSPPEEPAAGPR	R	D	0.95	26.8	36.1	2.21	2		683.815	2048.42	2049.88	3	-0.445	-217.1	249	267	TRUE
CG3902 CG3902-PA [Drosophila melanogaster]	gi|24666513	45349.3	1	8	9	54	0.000253	0.217	TRUE	S_F9.6119.6119.3.dta	VPEENILGTFGHGYK	R	Y	0.95	26.9	36.5	1.85	2		554.284	1659.83	1660.83	3	0.001602	0.9646	250	264	TRUE
terribly reduced optic lobes CG33950-PF, isoform F [Drosophila melanogaster]	gi|78706474	513388	1	89	107	871	0.00408	0.237	TRUE	S_F2.4115.4115.3.dta	GSGRPVNGPDVIITGNR	R	F	0.95	27	36.4	1.54	2		570.533	1708.58	1708.91	3	0.6738	394.1	1953	1969	TRUE	gi|161077537
terribly reduced optic lobes CG33950-PG, isoform G [Drosophila melanogaster]	gi|161077537	459070	0.5	1	1	4	1.87e-05	0.256	FALSE	S_F2.4115.4115.3.dta	GSGRPVNGPDVIITGNR	R	F	0.95	27	36.4	1.54	2		570.533	1708.58	1708.91	3	0.6738	394.1	1480	1496	FALSE	gi|78706474
Aconitase CG9244-PB, isoform B [Drosophila melanogaster]	gi|17864292	85383.5	1	27	37	473	0.00221	0.417	TRUE	S_F912.2792.2792.3.dta	SLAPGKPVDAEIKNGDKVER	K	I	0.95	27.1	36.2	1.41	2		708.866	2123.57	2123.15	3	1.436	675.9	739	758	TRUE
CG1970 CG1970-PA [Drosophila melanogaster]	gi|24638644	52904.4	1	7	8	45	0.000211	0.182	TRUE	A8.3743.3743.3.dta	APGFAHLAALEK	K	I	0.95	27.1	36.2	1.74	2		409.233	1224.67	1224.67	3	1.008	822.7	431	442	TRUE
viking CG16858-PA [Drosophila melanogaster]	gi|17137252	193761	1	18	19	190	0.000889	0.103	TRUE	S_E910.3272.3272.3.dta	RGPIGLAGQSGDPGLNGSR	R	G	0.95	27.2	36.4	2.74	2		604.021	1809.04	1808.94	3	1.11	613	387	405	TRUE
ATP synthase-gamma chain CG7610-PA, isoform A [Drosophila melanogaster]	gi|24651125,gi|24651127,gi|24651129	32854.5	1	14	17	98	0.000459	0.512	TRUE	A6.1159.1160.3.dta	GLcGAVHTGVAR	R	L	0.95	27.4	36.1	1.66	2	c3: Carbamidomethyl (+57.02)	399.575	1195.7	1197.62	3	-0.9069	-757.8	103	114	TRUE
CG14787 CG14787-PA [Drosophila melanogaster]	gi|23397616	29135.6	0.5	1	1	2	9.36e-06	0.0808	TRUE	S_F8.2838.2838.3.dta	TASHEEAVGSGDAEEQYIHEK	R	A	0.95	27.4	36.1	2.13	2		763.269	2286.78	2287.01	3	0.7811	341.4	84	104	TRUE
Ribosomal protein S7 CG1883-PA, isoform A [Drosophila melanogaster]	gi|21358459,gi|24651337,gi|45553763	22152.8	1	5	6	25	0.000117	0.289	TRUE	S_F8.2945.2945.3.dta	IIKPGGSDPDDFEK	K	S	0.95	27.7	36.6	1.89	2		506.577	1516.71	1517.75	3	-0.03281	-21.62	7	20	TRUE
Myosin heavy chain CG17927-PA, isoform A [Drosophila melanogaster]	gi|24584704,gi|28574239	224597	1	128	186	2330	0.0109	0.549	TRUE	S_F912.6914.6914.3.dta	QIEEAEEIAALNLAK	R	F	0.95	27.8	36.5	1.92	2		548.277	1641.81	1641.87	3	0.9454	575.5	1880	1894	TRUE	gi|24584700,gi|24584706,gi|24584710,gi|24584702,gi|24584712,gi|24584698
Myosin heavy chain CG17927-PF, isoform F [Drosophila melanogaster]	gi|24584700	224516	0.998	2	2	20	9.36e-05	0.548	FALSE	S_F912.6914.6914.3.dta	QIEEAEEIAALNLAK	R	F	0.95	27.8	36.5	1.92	2		548.277	1641.81	1641.87	3	0.9454	575.5	1880	1894	FALSE	gi|24584704,gi|28574239,gi|24584706,gi|24584710,gi|24584702,gi|24584712,gi|24584698
Myosin heavy chain CG17927-PB, isoform B [Drosophila melanogaster]	gi|24584710	224397	0.998	2	2	9	4.21e-05	0.534	FALSE	S_F912.6914.6914.3.dta	QIEEAEEIAALNLAK	R	F	0.95	27.8	36.5	1.92	2		548.277	1641.81	1641.87	3	0.9454	575.5	1880	1894	FALSE	gi|24584704,gi|24584700,gi|28574239,gi|24584706,gi|24584702,gi|24584712,gi|24584698
Myosin heavy chain CG17927-PJ, isoform J [Drosophila melanogaster]	gi|24584698	224394	0.998	2	2	3	1.4e-05	0.541	FALSE	S_F912.6914.6914.3.dta	QIEEAEEIAALNLAK	R	F	0.95	27.8	36.5	1.92	2		548.277	1641.81	1641.87	3	0.9454	575.5	1878	1892	FALSE	gi|24584704,gi|24584700,gi|28574239,gi|24584706,gi|24584710,gi|24584702,gi|24584712
Myosin heavy chain CG17927-PK, isoform K [Drosophila melanogaster]	gi|24584712	221394	0.993	1	1	1	4.68e-06	0.52	FALSE	S_F912.6914.6914.3.dta	QIEEAEEIAALNLAK	R	F	0.95	27.8	36.5	1.92	2		548.277	1641.81	1641.87	3	0.9454	575.5	1880	1894	FALSE	gi|24584704,gi|24584700,gi|28574239,gi|24584706,gi|24584710,gi|24584702,gi|24584698
Myosin heavy chain CG17927-PD, isoform D [Drosophila melanogaster]	gi|24584702,gi|24584706	224480	0.994	1	1	38	0.000178	0.544	FALSE	S_F912.6914.6914.3.dta	QIEEAEEIAALNLAK	R	F	0.95	27.8	36.5	1.92	2		548.277	1641.81	1641.87	3	0.9454	575.5	1880	1894	FALSE	gi|24584704,gi|24584700,gi|28574239,gi|24584710,gi|24584712,gi|24584698
Paramyosin CG5939-PA, isoform A [Drosophila melanogaster]	gi|24661112,gi|24661116	102322	1	39	51	578	0.0027	0.494	TRUE	S_F910.2860.2860.3.dta	RLENERDELTAAYK	R	E	0.95	27.9	36.6	1.74	2		569.967	1706.88	1707.87	3	0.01999	11.7	461	474	TRUE
CG10097 CG10097-PB, isoform B [Drosophila melanogaster]	gi|78706758	56986.7	1	11	14	80	0.000374	0.271	TRUE	S_F8.5369.5369.3.dta	FEEPLEHAVVINTR	R	A	0.95	27.9	36.5	1.96	2		552.268	1653.78	1653.86	3	0.9293	561.6	117	130	TRUE
Muscle-specific protein 300 CG33715-PD, isoform D [Drosophila melanogaster]	gi|161076705	1.40526e+06	1	45	45	109	0.00051	0.0478	TRUE	S_E912.2730.2730.3.dta	AVSSDDKIDTAPASQQmQQLNER	K	F	0.95	28	35.9	2.39	2	m17: Oxidation (+15.99)	850.363	2548.06	2548.2	3	0.8774	344.2	1465	1487	TRUE
Laminin A CG10236-PA [Drosophila melanogaster]	gi|17136292	411103	1	44	48	274	0.00128	0.16	TRUE	S_G1.5367.5367.3.dta	VNIVESNFQTISGKPVSR	R	A	0.95	28	36.3	2.1	2		659.3	1974.88	1975.06	3	0.8223	416.2	1705	1722	TRUE
Limpet CG32171-PB, isoform B [Drosophila melanogaster]	gi|21356031,gi|24665611,gi|45553163,gi|45553165	63655.6	1	7	9	62	0.00029	0.172	TRUE	S_F9.3084.3084.3.dta	cTAcVKPITGIGGTR	R	F	0.95	28	36.5	1.96	2	c1: Carbamidomethyl (+57.02), c4: Carbamidomethyl (+57.02)	531.415	1591.22	1590.81	3	1.419	891	499	513	TRUE
alpha Spectrin CG1977-PA [Drosophila melanogaster]	gi|17136504	278289	1	40	44	127	0.000594	0.207	TRUE	S_G1.3066.3066.3.dta	LQAASEESYRDPTNLQAK	K	I	0.95	28.1	36.3	1.41	2		674.789	2021.34	2020.99	3	1.356	670.6	67	84	TRUE
CG4389 CG4389-PB, isoform B [Drosophila melanogaster]	gi|24583077,gi|24583079	79622	1	27	31	210	0.000983	0.423	TRUE	S_E911.6821.6821.3.dta	DQTLASLRPTLDYSDFK	R	N	0.95	28.1	36.3	1.47	2		657.617	1969.83	1969.99	3	0.8469	429.7	396	412	TRUE
Aconitase CG9244-PB, isoform B [Drosophila melanogaster]	gi|17864292	85383.5	1	27	37	473	0.00221	0.417	TRUE	S_E6.2874.2874.3.dta	SLAPGKPVDAEIK	K	N	0.95	28.1	36.3	1.82	2		442.509	1324.5	1324.75	3	0.7627	575.4	739	751	TRUE
Aconitase CG9244-PB, isoform B [Drosophila melanogaster]	gi|17864292	85383.5	1	27	37	473	0.00221	0.417	TRUE	S_F7.2783.2783.3.dta	SLAPGKPVDAEIK	K	N	0.95	28.1	36.3	1.32	2		442.587	1324.74	1324.75	3	0.9988	753.4	739	751	TRUE
Myosin heavy chain CG17927-PA, isoform A [Drosophila melanogaster]	gi|24584704,gi|28574239	224597	1	128	186	2330	0.0109	0.549	TRUE	S_F910.7358.7358.3.dta	SKGSLEDQVVQTNPVLEAFGNAK	K	T	0.95	28.4	35.9	3.36	2		811.307	2430.9	2431.25	3	0.6584	270.7	211	233	TRUE	gi|24584700,gi|24584706,gi|24584710,gi|24584702,gi|24584712,gi|24584698
terribly reduced optic lobes CG33950-PF, isoform F [Drosophila melanogaster]	gi|78706474	513388	1	89	107	871	0.00408	0.237	TRUE	S_G2.5542.5542.3.dta	cPDMRPQDSGAYScEIINTR	R	G	0.95	28.4	36.3	1.41	2	c1: Carbamidomethyl (+57.02), c14: Carbamidomethyl (+57.02)	790.709	2369.1	2370.03	3	0.08477	35.77	1795	1814	TRUE	gi|161077537
Adenylate kinase-3 CG6612-PA, isoform A [Drosophila melanogaster]	gi|17737899,gi|24645822	24127.9	1	3	4	11	5.15e-05	0.162	TRUE	S_F7.2433.2433.3.dta	VPGKDDVTGEPLmQR	K	E	0.95	28.4	36.5	2.21	2	m13: Oxidation (+15.99)	553.458	1657.35	1657.82	3	0.5371	323.9	145	159	TRUE
Myosin heavy chain CG17927-PF, isoform F [Drosophila melanogaster]	gi|24584700	224516	0.998	2	2	20	9.36e-05	0.548	FALSE	S_F910.7358.7358.3.dta	SKGSLEDQVVQTNPVLEAFGNAK	K	T	0.95	28.4	35.9	3.36	2		811.307	2430.9	2431.25	3	0.6584	270.7	211	233	FALSE	gi|24584704,gi|28574239,gi|24584706,gi|24584710,gi|24584702,gi|24584712,gi|24584698
Myosin heavy chain CG17927-PB, isoform B [Drosophila melanogaster]	gi|24584710	224397	0.998	2	2	9	4.21e-05	0.534	FALSE	S_F910.7358.7358.3.dta	SKGSLEDQVVQTNPVLEAFGNAK	K	T	0.95	28.4	35.9	3.36	2		811.307	2430.9	2431.25	3	0.6584	270.7	211	233	FALSE	gi|24584704,gi|24584700,gi|28574239,gi|24584706,gi|24584702,gi|24584712,gi|24584698
Myosin heavy chain CG17927-PJ, isoform J [Drosophila melanogaster]	gi|24584698	224394	0.998	2	2	3	1.4e-05	0.541	FALSE	S_F910.7358.7358.3.dta	SKGSLEDQVVQTNPVLEAFGNAK	K	T	0.95	28.4	35.9	3.36	2		811.307	2430.9	2431.25	3	0.6584	270.7	211	233	FALSE	gi|24584704,gi|24584700,gi|28574239,gi|24584706,gi|24584710,gi|24584702,gi|24584712
terribly reduced optic lobes CG33950-PG, isoform G [Drosophila melanogaster]	gi|161077537	459070	0.5	1	1	4	1.87e-05	0.256	FALSE	S_G2.5542.5542.3.dta	cPDMRPQDSGAYScEIINTR	R	G	0.95	28.4	36.3	1.41	2	c1: Carbamidomethyl (+57.02), c14: Carbamidomethyl (+57.02)	790.709	2369.1	2370.03	3	0.08477	35.77	1322	1341	FALSE	gi|78706474
Myosin heavy chain CG17927-PK, isoform K [Drosophila melanogaster]	gi|24584712	221394	0.993	1	1	1	4.68e-06	0.52	FALSE	S_F910.7358.7358.3.dta	SKGSLEDQVVQTNPVLEAFGNAK	K	T	0.95	28.4	35.9	3.36	2		811.307	2430.9	2431.25	3	0.6584	270.7	211	233	FALSE	gi|24584704,gi|24584700,gi|28574239,gi|24584706,gi|24584710,gi|24584702,gi|24584698
Myosin heavy chain CG17927-PD, isoform D [Drosophila melanogaster]	gi|24584702,gi|24584706	224480	0.994	1	1	38	0.000178	0.544	FALSE	S_F910.7358.7358.3.dta	SKGSLEDQVVQTNPVLEAFGNAK	K	T	0.95	28.4	35.9	3.36	2		811.307	2430.9	2431.25	3	0.6584	270.7	211	233	FALSE	gi|24584704,gi|24584700,gi|28574239,gi|24584710,gi|24584712,gi|24584698
bent CG32019-PA, isoform A [Drosophila melanogaster]	gi|28558739,gi|45552153	1.00129e+06	1	118	128	787	0.00368	0.191	TRUE	S_G1.5765.5765.3.dta	YIEQPIKPAPLPIVTSR	K	Q	0.95	28.5	36.3	2.41	2		641.293	1920.86	1922.11	3	-0.2483	-129.2	8559	8575	TRUE
Ribosomal protein S7 CG1883-PA, isoform A [Drosophila melanogaster]	gi|21358459,gi|24651337,gi|45553763	22152.8	1	5	6	25	0.000117	0.289	TRUE	S_F7.2869.2869.3.dta	IIKPGGSDPDDFEK	K	S	0.95	28.6	36.7	2.14	2		506.095	1515.26	1517.75	3	-1.481	-976.5	7	20	TRUE
Syndecan CG10497-PA, isoform A [Drosophila melanogaster]	gi|17136884	42070.8	0.993	1	2	12	5.61e-05	0.0652	TRUE	S_F7.2696.2696.3.dta	GPGAGGSNVHELDPNTNVNSQPSDTK	R	G	0.95	28.6	35.9	2.4	2		864.61	2590.81	2592.19	3	-0.3775	-145.6	286	311	TRUE
Muscle LIM protein at 84B CG1019-PA, isoform A [Drosophila melanogaster]	gi|17137134,gi|24644746	53507.9	1	9	9	43	0.000201	0.23	TRUE	S_F911.4599.4599.3.dta	GYGYGQGGGALQSDcYAHDDGAPQIR	K	A	0.95	28.8	35.6	1.49	2	c15: Carbamidomethyl (+57.02)	905.335	2712.98	2713.17	3	0.819	301.8	181	206	TRUE
Elongation factor 2b CG2238-PA, isoform A [Drosophila melanogaster]	gi|24585709	94442.7	1	7	7	30	0.00014	0.0948	TRUE	S_E911.3059.3059.3.dta	DLEEDHAcIPLKK	K	S	0.95	28.8	36.5	1.37	2	c8: Carbamidomethyl (+57.02)	523.749	1568.22	1567.78	3	1.453	925.9	546	558	TRUE
CG31523 CG31523-PA, isoform A [Drosophila melanogaster]	gi|21355477,gi|24644008,gi|24644010,gi|28573236	41149.3	0.998	2	2	4	1.87e-05	0.105	TRUE	S_E912.5517.5517.3.dta	EGVLSNNDAIFNPDSSSSSLHQR	K	K	0.95	28.8	36	1.3	2		825.647	2473.92	2474.15	3	0.7719	311.9	329	351	TRUE
bent CG32019-PA, isoform A [Drosophila melanogaster]	gi|28558739,gi|45552153	1.00129e+06	1	118	128	787	0.00368	0.191	TRUE	S_F911.2910.2910.3.dta	AINAAGPGEPSDASKPIITKPR	K	K	0.95	28.9	36.1	1.32	2		731.213	2190.62	2190.19	3	1.435	654.7	4375	4396	TRUE
zormin CG33484-PD, isoform D [Drosophila melanogaster]	gi|116007762	411353	1	35	37	226	0.00106	0.131	TRUE	S_F5.3161.3161.3.dta	GSGLPASSDVQTVSQEHNTESSR	R	V	0.95	28.9	36	1.26	2		791.876	2372.6	2373.09	3	0.5206	219.3	2004	2026	TRUE
Paramyosin CG5939-PA, isoform A [Drosophila melanogaster]	gi|24661112,gi|24661116	102322	1	39	51	578	0.0027	0.494	TRUE	S_E7.2888.2888.3.dta	RLENERDELTAAYK	R	E	0.95	29	36.6	1.28	2		570.355	1708.04	1707.87	3	1.182	691.5	461	474	TRUE
Fat body protein 1 CG17285-PA, isoform A [Drosophila melanogaster]	gi|24664081,gi|24664085	119646	1	22	30	257	0.0012	0.244	TRUE	S_E9.7429.7429.3.dta	IQEVIGQVLNQVNVNSLR	R	G	0.95	29	36.1	1.29	2		674.92	2021.74	2023.13	3	-0.3856	-190.6	686	703	TRUE
upheld CG7107-PF, isoform F [Drosophila melanogaster]	gi|62473664	47113.5	1	17	23	236	0.0011	0.405	TRUE	A9.2533.2533.3.dta	KPPQTPAEGEGDPEFIK	K	R	0.95	29	36.4	2.68	2		614.022	1839.04	1839.91	3	0.1363	74.06	21	37	TRUE
Papilin CG33103-PA, isoform A [Drosophila melanogaster]	gi|28572036	312636	1	51	58	438	0.00205	0.228	TRUE	S_A12Dros.2003.2003.3.dta	QPDPAPTVAQcSQPADPGQcDK	R	W	0.95	29.1	36	1.48	2	c11: Carbamidomethyl (+57.02), c20: Carbamidomethyl (+57.02)	789.976	2366.91	2367.03	3	0.8787	371.1	1991	2012	TRUE
Paramyosin CG5939-PA, isoform A [Drosophila melanogaster]	gi|24661112,gi|24661116	102322	1	39	51	578	0.0027	0.494	TRUE	S_A9Dros.3297.3297.3.dta	QSLQLTELQAHYEDVQR	K	Q	0.95	29.1	36.3	1.68	2		687.011	2058.01	2058.03	3	0.992	481.8	576	592	TRUE	gi|24661124,gi|24661120
Paramyosin CG5939-PC, isoform C [Drosophila melanogaster]	gi|24661120,gi|24661124	74260.8	0.998	2	3	11	5.15e-05	0.375	FALSE	S_A9Dros.3297.3297.3.dta	QSLQLTELQAHYEDVQR	K	Q	0.95	29.1	36.3	1.68	2		687.011	2058.01	2058.03	3	0.992	481.8	337	353	FALSE	gi|24661116,gi|24661112
Cytochrome c proximal CG17903-PA [Drosophila melanogaster]	gi|17137228	11717	1	5	6	23	0.000108	0.38	TRUE	S_E3.4982.4982.3.dta	VGPNLHGLIGR	K	K	0.95	29.2	37.2	1.72	2		378.189	1131.54	1132.66	3	-0.1078	-95.18	33	43	TRUE
Cytochrome P450-4g1 CG3972-PA [Drosophila melanogaster]	gi|17933498	62954.7	1	24	31	601	0.00281	0.39	TRUE	S_E9.4730.4730.3.dta	SFVPTFVDHSK	K	A	0.95	29.4	36.6	1.33	2		421.76	1262.26	1263.64	3	-0.3717	-294.2	166	176	TRUE
CG12140 CG12140-PA [Drosophila melanogaster]	gi|24652256	65970.5	1	10	12	51	0.000239	0.22	TRUE	S_E910.3029.3029.3.dta	HGPQDHESLKPASScPPIVYPKPDGK	K	I	0.95	29.5	35.5	3.52	2	c15: Carbamidomethyl (+57.02)	948.266	2841.77	2841.4	3	1.382	486.1	475	500	TRUE
porin CG6647-PA, isoform A [Drosophila melanogaster]	gi|17136632,gi|19550069,gi|85724932	30532.8	1	12	17	129	0.000604	0.44	TRUE	S_E7.2243.2244.3.dta	TSSGIEFNTAGHSNQESGK	K	V	0.95	29.6	36.4	1.64	2		651.164	1950.47	1950.88	3	0.5971	306	34	52	TRUE
like-AP180 CG2520-PA [Drosophila melanogaster]	gi|24644772	49851.2	1	5	5	11	5.15e-05	0.132	TRUE	S_E7.5084.5084.3.dta	VAENVGIDKGDIPDLTK	K	A	0.95	29.6	36.5	1.28	2		595.77	1784.29	1783.94	3	1.35	756.1	267	283	TRUE
Succinate dehydrogenase B CG3283-PA [Drosophila melanogaster]	gi|17137106	33724	1	9	9	39	0.000182	0.273	TRUE	S_E7.4849.4849.3.dta	LKDPFSVYR	K	C	0.95	29.7	35.9	1.46	2		375.52	1123.54	1124.61	3	-0.0669	-59.49	243	251	TRUE
CG3902 CG3902-PA [Drosophila melanogaster]	gi|24666513	45349.3	1	8	9	54	0.000253	0.217	TRUE	S_G1.6111.6111.3.dta	VPEENILGTFGHGYK	R	Y	0.95	29.7	36.5	1.4	2		554.275	1659.8	1660.83	3	-0.0242	-14.57	250	264	TRUE
CG11963 CG11963-PB, isoform B [Drosophila melanogaster]	gi|161078106,gi|24645208	54791.9	1	12	12	179	0.000837	0.259	TRUE	S_A8Dros.2739.2739.3.dta	NGLKGGVRVVYDPQTAEELSSK	K	M	0.95	29.9	36.1	2.41	2		783.281	2346.82	2347.23	3	0.6015	256.2	98	119	TRUE
Cytochrome P450-4g1 CG3972-PA [Drosophila melanogaster]	gi|17933498	62954.7	1	24	31	601	0.00281	0.39	TRUE	S_F1.3552.3552.3.dta	NYIVHSTDTEADFK	R	L	0.95	30	36.5	3.06	2		547.16	1638.46	1639.76	3	-0.296	-180.5	517	530	TRUE
coracle CG11949-PA, isoform A [Drosophila melanogaster]	gi|24655527	184153	1	8	10	43	0.000201	0.073	TRUE	S_E911.3445.3445.3.dta	TGNLHLVSGVADPK	K	T	0.95	30	36.4	1.8	2		469.981	1406.92	1407.76	3	0.1668	118.5	854	867	TRUE
flotillin CG8200-PA, isoform A [Drosophila melanogaster]	gi|17137546	47116.8	1	13	14	28	0.000131	0.364	TRUE	S_F910.3692.3692.3.dta	KAEAEMAYELQAAK	K	T	0.95	30.1	36.4	2	2		518.354	1552.04	1552.77	3	0.2792	179.8	234	247	TRUE
CG10097 CG10097-PB, isoform B [Drosophila melanogaster]	gi|78706758	56986.7	1	11	14	80	0.000374	0.271	TRUE	S_F910.4100.4100.3.dta	VLDMHNSVSSETFEK	K	M	0.95	30.2	36.2	1.92	2		575.284	1722.83	1722.8	3	1.037	601.5	179	193	TRUE
Cytochrome P450-4g1 CG3972-PA [Drosophila melanogaster]	gi|17933498	62954.7	1	24	31	601	0.00281	0.39	TRUE	S_F910.4772.4772.3.dta	SFVPTFVDHSK	K	A	0.95	30.3	36.6	1.7	2		422.268	1263.78	1263.64	3	1.15	909.4	166	176	TRUE
Neural conserved at 73EF CG11661-PI, isoform I [Drosophila melanogaster]	gi|161084461	122879	1	19	20	218	0.00102	0.219	TRUE	S_E912.2465.2465.3.dta	HDFNRPAGIAAAPGAR	R	I	0.95	30.3	36.4	2.12	2		541.251	1620.73	1620.84	3	0.9027	556.6	1049	1064	TRUE
Actin 87E CG18290-PA, isoform A [Drosophila melanogaster]	gi|17137090,gi|24646579	41784.9	1	15	24	417	0.00195	0.423	TRUE	S_F2.5510.5510.3.dta	VAPEEHPVLLTEAPLNPK	R	A	0.95	30.3	36.3	1.62	2		651.924	1952.75	1954.07	3	-0.3078	-157.5	97	114	TRUE	gi|17647135,gi|62473515,gi|62473526,gi|24639997,gi|17975540,gi|17530805
lethal (2) 44DEa CG8732-PD, isoform D [Drosophila melanogaster]	gi|22026970,gi|24586634,gi|24586636,gi|62471679,gi|62471681,gi|62471683,gi|62471685,gi|62471687,gi|62471689	80601.5	1	12	12	107	0.000501	0.24	TRUE	S_F912.5712.5712.3.dta	VTNKPYPQGEVLIGGEcVSQGYYK	R	L	0.95	30.3	35.6	2.89	2	c17: Carbamidomethyl (+57.02)	896.373	2686.09	2686.32	3	0.7837	291.6	516	539	TRUE
Succinate dehydrogenase B CG3283-PA [Drosophila melanogaster]	gi|17137106	33724	1	9	9	39	0.000182	0.273	TRUE	S_E7.4913.4913.3.dta	LKDPFSVYR	K	C	0.95	30.3	35.9	1.33	2		375.477	1123.41	1124.61	3	-0.1959	-174.2	243	251	TRUE
CG14476 CG14476-PB, isoform B [Drosophila melanogaster]	gi|21357605,gi|24643746,gi|24643749,gi|24643751,gi|24643753	105714	1	2	2	10	4.68e-05	0.04	TRUE	S_F911.2097.2097.3.dta	AQEPTSHPAENENQQEQDAAVETPK	K	A	0.95	30.3	35.9	2.44	2		916.913	2747.72	2748.24	3	0.4896	178.1	171	195	TRUE
Actin 79B CG7478-PA [Drosophila melanogaster]	gi|17975540	41769.7	0.998	2	2	4	1.87e-05	0.388	FALSE	S_F2.5510.5510.3.dta	VAPEEHPVLLTEAPLNPK	R	A	0.95	30.3	36.3	1.62	2		651.924	1952.75	1954.07	3	-0.3078	-157.5	97	114	FALSE	gi|17647135,gi|62473515,gi|62473526,gi|24639997,gi|17530805,gi|17137090,gi|24646579
Actin 5C CG4027-PB, isoform B [Drosophila melanogaster]	gi|17530805,gi|24639997,gi|62473515,gi|62473526	41804.7	0.998	2	3	13	6.08e-05	0.364	FALSE	S_F2.5510.5510.3.dta	VAPEEHPVLLTEAPLNPK	R	A	0.95	30.3	36.3	1.62	2		651.924	1952.75	1954.07	3	-0.3078	-157.5	97	114	FALSE	gi|17647135,gi|17975540,gi|17137090,gi|24646579
Actin 57B CG10067-PA, isoform A [Drosophila melanogaster]	gi|17647135	41817.9	0.5	1	2	54	0.000253	0.423	FALSE	S_F2.5510.5510.3.dta	VAPEEHPVLLTEAPLNPK	R	A	0.95	30.3	36.3	1.62	2		651.924	1952.75	1954.07	3	-0.3078	-157.5	97	114	FALSE	gi|62473515,gi|62473526,gi|24639997,gi|17975540,gi|17530805,gi|17137090,gi|24646579
Paramyosin CG5939-PA, isoform A [Drosophila melanogaster]	gi|24661112,gi|24661116	102322	1	39	51	578	0.0027	0.494	TRUE	S_F912.3018.3018.3.dta	RLENERDELTAAYK	R	E	0.95	30.4	36.6	1.39	2		570.444	1708.31	1707.87	3	1.449	847.6	461	474	TRUE
Myosin heavy chain CG17927-PA, isoform A [Drosophila melanogaster]	gi|24584704,gi|28574239	224597	1	128	186	2330	0.0109	0.549	TRUE	S_F1.5845.5845.3.dta	LKVDDLAAELDASQK	K	E	0.95	30.5	36.8	2.17	2		539.167	1614.48	1615.85	3	-0.3682	-227.9	1457	1471	TRUE	gi|24584700,gi|24584706,gi|24584710,gi|24584702,gi|24584712,gi|24584698
CG10097 CG10097-PB, isoform B [Drosophila melanogaster]	gi|78706758	56986.7	1	11	14	80	0.000374	0.271	TRUE	S_F910.4943.4943.3.dta	MTPISGDccAPDLGISETDRR	K	I	0.95	30.5	36	2.28	2	c8: Carbamidomethyl (+57.02), c9: Carbamidomethyl (+57.02)	784.261	2349.76	2351.04	3	-0.2768	-117.8	79	99	TRUE
Myosin heavy chain CG17927-PF, isoform F [Drosophila melanogaster]	gi|24584700	224516	0.998	2	2	20	9.36e-05	0.548	FALSE	S_F1.5845.5845.3.dta	LKVDDLAAELDASQK	K	E	0.95	30.5	36.8	2.17	2		539.167	1614.48	1615.85	3	-0.3682	-227.9	1457	1471	FALSE	gi|24584704,gi|28574239,gi|24584706,gi|24584710,gi|24584702,gi|24584712,gi|24584698
Myosin heavy chain CG17927-PB, isoform B [Drosophila melanogaster]	gi|24584710	224397	0.998	2	2	9	4.21e-05	0.534	FALSE	S_F1.5845.5845.3.dta	LKVDDLAAELDASQK	K	E	0.95	30.5	36.8	2.17	2		539.167	1614.48	1615.85	3	-0.3682	-227.9	1457	1471	FALSE	gi|24584704,gi|24584700,gi|28574239,gi|24584706,gi|24584702,gi|24584712,gi|24584698
Myosin heavy chain CG17927-PJ, isoform J [Drosophila melanogaster]	gi|24584698	224394	0.998	2	2	3	1.4e-05	0.541	FALSE	S_F1.5845.5845.3.dta	LKVDDLAAELDASQK	K	E	0.95	30.5	36.8	2.17	2		539.167	1614.48	1615.85	3	-0.3682	-227.9	1455	1469	FALSE	gi|24584704,gi|24584700,gi|28574239,gi|24584706,gi|24584710,gi|24584702,gi|24584712
Myosin heavy chain CG17927-PK, isoform K [Drosophila melanogaster]	gi|24584712	221394	0.993	1	1	1	4.68e-06	0.52	FALSE	S_F1.5845.5845.3.dta	LKVDDLAAELDASQK	K	E	0.95	30.5	36.8	2.17	2		539.167	1614.48	1615.85	3	-0.3682	-227.9	1457	1471	FALSE	gi|24584704,gi|24584700,gi|28574239,gi|24584706,gi|24584710,gi|24584702,gi|24584698
Myosin heavy chain CG17927-PD, isoform D [Drosophila melanogaster]	gi|24584702,gi|24584706	224480	0.994	1	1	38	0.000178	0.544	FALSE	S_F1.5845.5845.3.dta	LKVDDLAAELDASQK	K	E	0.95	30.5	36.8	2.17	2		539.167	1614.48	1615.85	3	-0.3682	-227.9	1457	1471	FALSE	gi|24584704,gi|24584700,gi|28574239,gi|24584710,gi|24584712,gi|24584698
Muscle-specific protein 300 CG33715-PD, isoform D [Drosophila melanogaster]	gi|161076705	1.40526e+06	1	45	45	109	0.00051	0.0478	TRUE	S_F911.2771.2771.3.dta	AVSSDDKIDTAPASQQmQQLNER	K	F	0.95	30.6	35.9	1.72	2	m17: Oxidation (+15.99)	850.311	2547.91	2548.2	3	0.7223	283.4	1465	1487	TRUE
CDP diglyceride synthetase CG7962-PA [Drosophila melanogaster]	gi|17864222	51496	0.998	2	3	8	3.74e-05	0.0694	TRUE	S_E9.3049.3049.3.dta	KGEDEPLEDTAISGSDAANKR	R	N	0.95	30.6	36.2	1.77	2		735.348	2203.02	2203.05	3	0.9803	444.8	8	28	TRUE
CG15093 CG15093-PB, isoform B [Drosophila melanogaster]	gi|19922568,gi|24655230	33865.7	0.998	2	3	5	2.34e-05	0.114	TRUE	S_E8.7065.7065.3.dta	DLGLASGVANASNSPIPLGSLAHK	K	V	0.95	30.7	36.1	2.44	2		763.782	2288.32	2289.22	3	0.1103	48.18	272	295	TRUE
Myosin heavy chain CG17927-PA, isoform A [Drosophila melanogaster]	gi|24584704,gi|28574239	224597	1	128	186	2330	0.0109	0.549	TRUE	S_A11Dros.3083.3083.3.dta	QAEQELADAHEQLNEVSAQNASISAAK	R	R	0.95	30.8	35.7	1.59	2		951.501	2851.48	2852.37	3	0.1212	42.5	1700	1726	TRUE	gi|24584700,gi|24584706,gi|24584710,gi|24584702,gi|24584712,gi|24584698
CG10097 CG10097-PB, isoform B [Drosophila melanogaster]	gi|78706758	56986.7	1	11	14	80	0.000374	0.271	TRUE	S_E910.2832.2832.3.dta	VLDmHNSVSSETFEK	K	M	0.95	30.8	36.2	1.4	2	m4: Oxidation (+15.99)	580.756	1739.25	1738.8	3	1.458	837.7	179	193	TRUE
innexin 2 CG4590-PA, isoform A [Drosophila melanogaster]	gi|18858897,gi|24640280	42471.4	1	5	6	10	4.68e-05	0.174	TRUE	S_E8.3026.3026.3.dta	DVVQPGVGSHVEGEDEVK	R	Y	0.95	30.8	36.3	2.64	2		627.564	1879.67	1879.9	3	0.7734	411.2	87	104	TRUE
Myosin heavy chain CG17927-PF, isoform F [Drosophila melanogaster]	gi|24584700	224516	0.998	2	2	20	9.36e-05	0.548	FALSE	S_A11Dros.3083.3083.3.dta	QAEQELADAHEQLNEVSAQNASISAAK	R	R	0.95	30.8	35.7	1.59	2		951.501	2851.48	2852.37	3	0.1212	42.5	1700	1726	FALSE	gi|24584704,gi|28574239,gi|24584706,gi|24584710,gi|24584702,gi|24584712,gi|24584698
Myosin heavy chain CG17927-PB, isoform B [Drosophila melanogaster]	gi|24584710	224397	0.998	2	2	9	4.21e-05	0.534	FALSE	S_A11Dros.3083.3083.3.dta	QAEQELADAHEQLNEVSAQNASISAAK	R	R	0.95	30.8	35.7	1.59	2		951.501	2851.48	2852.37	3	0.1212	42.5	1700	1726	FALSE	gi|24584704,gi|24584700,gi|28574239,gi|24584706,gi|24584702,gi|24584712,gi|24584698
Myosin heavy chain CG17927-PJ, isoform J [Drosophila melanogaster]	gi|24584698	224394	0.998	2	2	3	1.4e-05	0.541	FALSE	S_A11Dros.3083.3083.3.dta	QAEQELADAHEQLNEVSAQNASISAAK	R	R	0.95	30.8	35.7	1.59	2		951.501	2851.48	2852.37	3	0.1212	42.5	1698	1724	FALSE	gi|24584704,gi|24584700,gi|28574239,gi|24584706,gi|24584710,gi|24584702,gi|24584712
Myosin heavy chain CG17927-PK, isoform K [Drosophila melanogaster]	gi|24584712	221394	0.993	1	1	1	4.68e-06	0.52	FALSE	S_A11Dros.3083.3083.3.dta	QAEQELADAHEQLNEVSAQNASISAAK	R	R	0.95	30.8	35.7	1.59	2		951.501	2851.48	2852.37	3	0.1212	42.5	1700	1726	FALSE	gi|24584704,gi|24584700,gi|28574239,gi|24584706,gi|24584710,gi|24584702,gi|24584698
Myosin heavy chain CG17927-PD, isoform D [Drosophila melanogaster]	gi|24584702,gi|24584706	224480	0.994	1	1	38	0.000178	0.544	FALSE	S_A11Dros.3083.3083.3.dta	QAEQELADAHEQLNEVSAQNASISAAK	R	R	0.95	30.8	35.7	1.59	2		951.501	2851.48	2852.37	3	0.1212	42.5	1700	1726	FALSE	gi|24584704,gi|24584700,gi|28574239,gi|24584710,gi|24584712,gi|24584698
viking CG16858-PA [Drosophila melanogaster]	gi|17137252	193761	1	18	19	190	0.000889	0.103	TRUE	S_G3.3996.3996.3.dta	GPQGESGVVGLDGRNGQIGDQGPR	K	G	0.95	30.9	35.9	2.19	2		783.973	2348.9	2350.15	3	-0.247	-105.1	1130	1153	TRUE
Ribosomal protein S7 CG1883-PA, isoform A [Drosophila melanogaster]	gi|21358459,gi|24651337,gi|45553763	22152.8	1	5	6	25	0.000117	0.289	TRUE	S_F8.2955.2955.3.dta	IIKPGGSDPDDFEK	K	S	0.95	30.9	36.6	1.48	2		506.558	1516.65	1517.75	3	-0.09161	-60.36	7	20	TRUE
Eukaryotic initiation factor 4E CG4035-PB, isoform B [Drosophila melanogaster]	gi|17864468,gi|24661542,gi|24661546,gi|24661553,gi|24661557,gi|24661561,gi|24661565	29206.7	0.998	2	3	21	9.83e-05	0.193	TRUE	S_E911.2154.2154.3.dta	TSAPSTEQGRPEPPTSAAAPAEAK	K	D	0.95	30.9	36.2	2.89	2		784.729	2351.16	2351.15	3	1.022	434.6	20	43	TRUE
Mitochondrial phosphate carrier protein CG4994-PA, isoform A [Drosophila melanogaster]	gi|24664191,gi|24664195	38832.9	1	8	12	46	0.000215	0.32	TRUE	S_E7.5244.5244.3.dta	VALGIPRPPPPEmPASLK	K	A	0.95	31	36.5	1.46	2	m13: Oxidation (+15.99)	629.213	1884.61	1886.06	3	-0.4351	-230.8	335	352	TRUE
terribly reduced optic lobes CG33950-PF, isoform F [Drosophila melanogaster]	gi|78706474	513388	1	89	107	871	0.00408	0.237	TRUE	S_G3.5134.5134.3.dta	KAEEcVQcFcFGVAK	R	A	0.95	31.1	36.5	2.28	2	c5: Carbamidomethyl (+57.02), c8: Carbamidomethyl (+57.02), c10: Carbamidomethyl (+57.02)	611.962	1832.86	1832.81	3	1.056	575.9	1846	1860	TRUE	gi|161077537
CG13091 CG13091-PA [Drosophila melanogaster]	gi|19920962	59459.3	1	8	8	37	0.000173	0.205	TRUE	S_E7.5404.5404.3.dta	LVTPISGDcSEPGLGLSDGDRR	K	M	0.95	31.1	36.2	1.92	2	c9: Carbamidomethyl (+57.02)	767.843	2300.51	2301.11	3	0.3985	173.2	78	99	TRUE
Imaginal disc growth factor 2 CG4475-PA [Drosophila melanogaster]	gi|19549546	49142.7	1	2	2	5	2.34e-05	0.0818	TRUE	S_E9.3529.3529.3.dta	NPEEADYSAPIYHPDGSK	R	D	0.95	31.1	36.4	1.82	2		663.902	1988.68	1989.88	3	-0.1936	-97.3	250	267	TRUE
terribly reduced optic lobes CG33950-PG, isoform G [Drosophila melanogaster]	gi|161077537	459070	0.5	1	1	4	1.87e-05	0.256	FALSE	S_G3.5134.5134.3.dta	KAEEcVQcFcFGVAK	R	A	0.95	31.1	36.5	2.28	2	c5: Carbamidomethyl (+57.02), c8: Carbamidomethyl (+57.02), c10: Carbamidomethyl (+57.02)	611.962	1832.86	1832.81	3	1.056	575.9	1373	1387	FALSE	gi|78706474
Papilin CG33103-PA, isoform A [Drosophila melanogaster]	gi|28572036	312636	1	51	58	438	0.00205	0.228	TRUE	S_F2.4012.4012.3.dta	RYFScNTQDcPEEESDFR	R	A	0.95	31.3	36.2	1.57	2	c5: Carbamidomethyl (+57.02), c10: Carbamidomethyl (+57.02)	780.818	2339.43	2339.93	3	0.5078	216.9	101	118	TRUE
CG3074 CG3074-PA, isoform A [Drosophila melanogaster]	gi|24657813,gi|24657819	48768.3	1	8	13	44	0.000206	0.213	TRUE	S_A8Dros.1343.1343.3.dta	KAPTGFHSVK	R	L	0.95	31.3	36.9	2.14	2		357.874	1070.6	1071.6	3	0.0113	10.54	361	370	TRUE
upheld CG7107-PF, isoform F [Drosophila melanogaster]	gi|62473664	47113.5	1	17	23	236	0.0011	0.405	TRUE	S_E9.3713.3713.3.dta	KPPQTPAEGEGDPEFIK	K	R	0.95	31.4	36.3	2.31	2		614.194	1839.56	1839.91	3	0.6532	354.9	21	37	TRUE
upheld CG7107-PF, isoform F [Drosophila melanogaster]	gi|62473664	47113.5	1	17	23	236	0.0011	0.405	TRUE	S_G1.2896.2896.3.dta	KPPQTPAEGEGDPEFIKR	K	Q	0.95	31.4	36.3	2.11	2		666.214	1995.62	1996.01	3	0.613	307	21	38	TRUE
CG7430 CG7430-PA [Drosophila melanogaster]	gi|21358499	53066.3	1	9	11	34	0.000159	0.246	TRUE	A8.1192.1192.3.dta	SEEQLKQEGVAYK	K	V	0.95	31.4	36.5	2.46	2		503.72	1508.14	1508.76	3	0.3856	255.5	400	412	TRUE
lethal (1) G0230 CG2968-PA [Drosophila melanogaster]	gi|18858089	16709.7	1	4	5	22	0.000103	0.197	TRUE	S_A2Dros.1491.1491.3.dta	YQSQLSSAGDDKAK	K	A	0.95	31.4	36.4	1.34	2		500.29	1497.85	1497.72	3	1.136	757.8	126	139	TRUE
Paramyosin CG5939-PA, isoform A [Drosophila melanogaster]	gi|24661112,gi|24661116	102322	1	39	51	578	0.0027	0.494	TRUE	S_F911.2909.2909.3.dta	RLENERDELTAAYK	R	E	0.95	31.5	36.6	1.66	2		570.05	1707.13	1707.87	3	0.2678	156.8	461	474	TRUE
maggie CG14981-PA, isoform A [Drosophila melanogaster]	gi|17647639	16134.1	1	4	4	16	7.49e-05	0.25	TRUE	S_E5.2740.2740.3.dta	AVAATSNDPQRENYDDEPDETASER	R	F	0.95	31.5	35.7	3.05	2		927.751	2780.23	2780.19	3	1.05	377.6	31	55	TRUE
Larval serum protein 1 gamma CG6821-PA [Drosophila melanogaster]	gi|17647601	93395.1	1	24	29	120	0.000561	0.31	TRUE	S_E911.4160.4160.3.dta	TADGQVFDLHKPEAIK	K	I	0.95	31.6	36.4	1.49	2		590.632	1768.87	1768.92	3	0.9559	540.1	408	423	TRUE
Aldehyde dehydrogenase CG3752-PA [Drosophila melanogaster]	gi|20129399	57002	1	16	20	178	0.000833	0.34	TRUE	S_A8Dros.3496.3496.3.dta	TVGNPFDLNTEQGPQVNEEQMEK	R	I	0.95	31.6	35.9	1.8	2		868.924	2603.75	2604.19	3	0.5665	217.5	349	371	TRUE
Actin 87E CG18290-PA, isoform A [Drosophila melanogaster]	gi|17137090,gi|24646579	41784.9	1	15	24	417	0.00195	0.423	TRUE	S_F910.2396.2396.3.dta	QEYDESGPGIVHR	K	K	0.95	31.6	36.8	1.62	2		496.442	1486.3	1486.69	3	0.6189	416.1	361	373	TRUE	gi|17647135,gi|17975540
Actin 87E CG18290-PA, isoform A [Drosophila melanogaster]	gi|17137090,gi|24646579	41784.9	1	15	24	417	0.00195	0.423	TRUE	S_E912.5447.5447.3.dta	VAPEEHPVLLTEAPLNPK	R	A	0.95	31.6	36.2	1.39	2		652.251	1953.73	1954.07	3	0.6735	344.5	97	114	TRUE	gi|17647135,gi|62473515,gi|62473526,gi|24639997,gi|17975540,gi|17530805
fondue CG15825-PB, isoform B [Drosophila melanogaster]	gi|20129625	58012.6	1	7	9	86	0.000402	0.153	TRUE	S_E8.4684.4684.3.dta	IVEQPTQVTQTVPVQTAHYYQR	R	K	0.95	31.6	36.1	2.23	2		862.559	2584.65	2586.33	3	-0.6703	-259.2	265	286	TRUE
Ribosomal protein S7 CG1883-PA, isoform A [Drosophila melanogaster]	gi|21358459,gi|24651337,gi|45553763	22152.8	1	5	6	25	0.000117	0.289	TRUE	S_F8.2929.2929.3.dta	IIKPGGSDPDDFEK	K	S	0.95	31.6	36.6	2.8	2		506.649	1516.92	1517.75	3	0.1823	120.1	7	20	TRUE
Ribosomal protein L6 CG11522-PB, isoform B [Drosophila melanogaster]	gi|21357161,gi|24651668	29719.7	1	3	4	22	0.000103	0.107	TRUE	S_F2.4180.4180.3.dta	VPEHLNDAYFR	K	R	0.95	31.6	36.7	1.35	2		454.321	1359.94	1360.66	3	0.2825	207.6	178	188	TRUE
Actin 79B CG7478-PA [Drosophila melanogaster]	gi|17975540	41769.7	0.998	2	2	4	1.87e-05	0.388	FALSE	S_F910.2396.2396.3.dta	QEYDESGPGIVHR	K	K	0.95	31.6	36.8	1.62	2		496.442	1486.3	1486.69	3	0.6189	416.1	361	373	FALSE	gi|17647135,gi|17137090,gi|24646579
Actin 79B CG7478-PA [Drosophila melanogaster]	gi|17975540	41769.7	0.998	2	2	4	1.87e-05	0.388	FALSE	S_E912.5447.5447.3.dta	VAPEEHPVLLTEAPLNPK	R	A	0.95	31.6	36.2	1.39	2		652.251	1953.73	1954.07	3	0.6735	344.5	97	114	FALSE	gi|17647135,gi|62473515,gi|62473526,gi|24639997,gi|17530805,gi|17137090,gi|24646579
Actin 5C CG4027-PB, isoform B [Drosophila melanogaster]	gi|17530805,gi|24639997,gi|62473515,gi|62473526	41804.7	0.998	2	3	13	6.08e-05	0.364	FALSE	S_E912.5447.5447.3.dta	VAPEEHPVLLTEAPLNPK	R	A	0.95	31.6	36.2	1.39	2		652.251	1953.73	1954.07	3	0.6735	344.5	97	114	FALSE	gi|17647135,gi|17975540,gi|17137090,gi|24646579
Actin 57B CG10067-PA, isoform A [Drosophila melanogaster]	gi|17647135	41817.9	0.5	1	2	54	0.000253	0.423	FALSE	S_E912.5447.5447.3.dta	VAPEEHPVLLTEAPLNPK	R	A	0.95	31.6	36.2	1.39	2		652.251	1953.73	1954.07	3	0.6735	344.5	97	114	FALSE	gi|62473515,gi|62473526,gi|24639997,gi|17975540,gi|17530805,gi|17137090,gi|24646579
Cytochrome P450-4g1 CG3972-PA [Drosophila melanogaster]	gi|17933498	62954.7	1	24	31	601	0.00281	0.39	TRUE	S_E912.3539.3539.3.dta	NYIVHSTDTEADFK	R	L	0.95	31.7	36.4	1.92	2		547.14	1638.4	1639.76	3	-0.3551	-216.6	517	530	TRUE
zormin CG33484-PD, isoform D [Drosophila melanogaster]	gi|116007762	411353	1	35	37	226	0.00106	0.131	TRUE	S_E8.3004.3004.3.dta	GSGLPASSDVQTVSQEHNTESSR	R	V	0.95	31.8	36	1.48	2		791.591	2371.75	2373.09	3	-0.3344	-140.9	2004	2026	TRUE
ATP synthase-beta CG11154-PA, isoform A [Drosophila melanogaster]	gi|24638766	54091	1	17	26	585	0.00274	0.457	TRUE	S_A8Dros.2927.2927.3.dta	IPSAVGYQPTLATDmGSmQER	R	I	0.95	31.8	35.9	2.12	2	m15: Oxidation (+15.99), m18: Oxidation (+15.99)	762.285	2283.83	2284.06	3	0.7803	341.5	302	322	TRUE
Catalase CG6871-PA [Drosophila melanogaster]	gi|17981717	57132.4	1	10	11	74	0.000346	0.263	TRUE	S_F911.7249.7249.3.dta	DPILFPSFIHTQK	R	R	0.95	31.8	36.7	1.31	2		515.234	1542.68	1542.83	3	0.8542	553.3	155	167	TRUE
Ribosomal protein S4 CG11276-PA, isoform A [Drosophila melanogaster]	gi|24663668,gi|24663672	29117.2	1	9	10	37	0.000173	0.345	TRUE	S_E7.3996.3996.3.dta	HPGSFDIVHIK	R	D	0.95	31.8	36.7	2.96	2		417.276	1248.8	1249.67	3	0.143	114.4	201	211	TRUE
UGP CG4347-PA, isoform A [Drosophila melanogaster]	gi|62484278,gi|62484452	58736.3	1	7	8	69	0.000323	0.167	TRUE	S_F911.6189.6189.3.dta	LLEIAQVPPEHVDDFK	R	S	0.95	31.8	36.3	1.47	2		617.152	1848.43	1849.97	3	-0.5307	-287	315	330	TRUE
Alcohol dehydrogenase CG3481-PC, isoform C [Drosophila melanogaster]	gi|78706922,gi|78706924,gi|78706926,gi|78706928,gi|78706930	27716.8	1	5	8	24	0.000112	0.277	TRUE	S_E7.6572.6572.3.dta	LAPITGVTAYTVNPGITR	K	T	0.95	31.8	36.4	2.42	2		615.72	1844.14	1844.03	3	1.117	605.4	170	187	TRUE
terribly reduced optic lobes CG33950-PF, isoform F [Drosophila melanogaster]	gi|78706474	513388	1	89	107	871	0.00408	0.237	TRUE	S_G3.3611.3611.3.dta	GSGRPVNGPDVIITGNR	R	F	0.95	31.9	36.4	1.6	2		570.642	1708.9	1708.91	3	1.002	585.8	1953	1969	TRUE	gi|161077537
CG3415 CG3415-PA [Drosophila melanogaster]	gi|18859837	64056.3	1	16	18	76	0.000356	0.328	TRUE	S_E910.4757.4757.3.dta	KDPIAGVVPLQPAPNR	K	Q	0.95	31.9	36.6	1.35	2		558.26	1671.76	1671.95	3	0.8105	484.5	458	473	TRUE
Actin 87E CG18290-PA, isoform A [Drosophila melanogaster]	gi|17137090,gi|24646579	41784.9	1	15	24	417	0.00195	0.423	TRUE	A7.7847.7847.3.dta	VAPEEHPVLLTEAPLNPK	R	A	0.95	31.9	36.2	1.42	2		652.416	1954.22	1954.07	3	1.167	597	97	114	TRUE	gi|17647135,gi|62473515,gi|62473526,gi|24639997,gi|17975540,gi|17530805
CG6782 CG6782-PE, isoform E [Drosophila melanogaster]	gi|78706744,gi|78706746,gi|78706748,gi|78706750	34076.3	1	10	10	28	0.000131	0.259	TRUE	S_F8.3867.3867.3.dta	GFAHGVGQIIK	R	S	0.95	31.9	36	1.35	2		376.253	1125.74	1126.64	3	0.1072	95.15	171	181	TRUE
Adenylate kinase-3 CG6612-PA, isoform A [Drosophila melanogaster]	gi|17737899,gi|24645822	24127.9	1	3	4	11	5.15e-05	0.162	TRUE	S_E6.2479.2479.3.dta	VPGKDDVTGEPLmQR	K	E	0.95	31.9	36.6	1.62	2	m13: Oxidation (+15.99)	553.231	1656.67	1657.82	3	-0.1457	-87.9	145	159	TRUE
Actin 79B CG7478-PA [Drosophila melanogaster]	gi|17975540	41769.7	0.998	2	2	4	1.87e-05	0.388	FALSE	A7.7847.7847.3.dta	VAPEEHPVLLTEAPLNPK	R	A	0.95	31.9	36.2	1.42	2		652.416	1954.22	1954.07	3	1.167	597	97	114	FALSE	gi|17647135,gi|62473515,gi|62473526,gi|24639997,gi|17530805,gi|17137090,gi|24646579
Actin 5C CG4027-PB, isoform B [Drosophila melanogaster]	gi|17530805,gi|24639997,gi|62473515,gi|62473526	41804.7	0.998	2	3	13	6.08e-05	0.364	FALSE	A7.7847.7847.3.dta	VAPEEHPVLLTEAPLNPK	R	A	0.95	31.9	36.2	1.42	2		652.416	1954.22	1954.07	3	1.167	597	97	114	FALSE	gi|17647135,gi|17975540,gi|17137090,gi|24646579
Actin 57B CG10067-PA, isoform A [Drosophila melanogaster]	gi|17647135	41817.9	0.5	1	2	54	0.000253	0.423	FALSE	A7.7847.7847.3.dta	VAPEEHPVLLTEAPLNPK	R	A	0.95	31.9	36.2	1.42	2		652.416	1954.22	1954.07	3	1.167	597	97	114	FALSE	gi|62473515,gi|62473526,gi|24639997,gi|17975540,gi|17530805,gi|17137090,gi|24646579
terribly reduced optic lobes CG33950-PG, isoform G [Drosophila melanogaster]	gi|161077537	459070	0.5	1	1	4	1.87e-05	0.256	FALSE	S_G3.3611.3611.3.dta	GSGRPVNGPDVIITGNR	R	F	0.95	31.9	36.4	1.6	2		570.642	1708.9	1708.91	3	1.002	585.8	1480	1496	FALSE	gi|78706474
Fat body protein 1 CG17285-PA, isoform A [Drosophila melanogaster]	gi|24664081,gi|24664085	119646	1	22	30	257	0.0012	0.244	TRUE	S_F910.5019.5019.3.dta	QVLAQIGQIEQR	R	I	0.95	32.1	36.2	1.54	2		461.528	1381.56	1382.78	3	-0.2064	-149.3	674	685	TRUE
upheld CG7107-PF, isoform F [Drosophila melanogaster]	gi|62473664	47113.5	1	17	23	236	0.0011	0.405	TRUE	S_E912.2957.2957.3.dta	KPPQTPAEGEGDPEFIKR	K	Q	0.95	32.1	36.2	2.41	2		666.253	1995.74	1996.01	3	0.7291	365.1	21	38	TRUE
terribly reduced optic lobes CG33950-PF, isoform F [Drosophila melanogaster]	gi|78706474	513388	1	89	107	871	0.00408	0.237	TRUE	S_E9.6540.6540.3.dta	TDSQILVLTNLRPEDAGR	R	Y	0.95	32.2	36.2	1.68	2		666.823	1997.45	1998.06	3	0.3912	195.8	3684	3701	TRUE	gi|161077537
Cytochrome P450-4g1 CG3972-PA [Drosophila melanogaster]	gi|17933498	62954.7	1	24	31	601	0.00281	0.39	TRUE	S_A8Dros.3056.3056.3.dta	SFVPTFVDHSK	K	A	0.95	32.2	36.6	2.08	2		421.905	1262.69	1263.64	3	0.0612	48.43	166	176	TRUE
Fat body protein 1 CG17285-PA, isoform A [Drosophila melanogaster]	gi|24664081,gi|24664085	119646	1	22	30	257	0.0012	0.244	TRUE	S_E9.5923.5923.3.dta	GQQAQQVVGIQQLVGENGR	K	F	0.95	32.2	36.2	2.55	2		670.243	2007.7	2009.05	3	-0.3405	-169.5	927	945	TRUE
Vha68-2 CG3762-PA, isoform A [Drosophila melanogaster]	gi|24583984,gi|24583986,gi|24583988	68284.8	1	10	10	34	0.000159	0.205	TRUE	S_F911.6479.6479.3.dta	VGSHITGGDLYGLVHENTLVK	K	H	0.95	32.2	36.2	1.82	2		737.1	2208.28	2209.16	3	0.1225	55.46	140	160	TRUE
terribly reduced optic lobes CG33950-PG, isoform G [Drosophila melanogaster]	gi|161077537	459070	0.5	1	1	4	1.87e-05	0.256	FALSE	S_E9.6540.6540.3.dta	TDSQILVLTNLRPEDAGR	R	Y	0.95	32.2	36.2	1.68	2		666.823	1997.45	1998.06	3	0.3912	195.8	3211	3228	FALSE	gi|78706474
upheld CG7107-PF, isoform F [Drosophila melanogaster]	gi|62473664	47113.5	1	17	23	236	0.0011	0.405	TRUE	S_A5Dros.2473.2473.3.dta	KPPQTPAEGEGDPEFIK	K	R	0.95	32.3	36.4	1.77	2		613.886	1838.63	1839.91	3	-0.2717	-147.7	21	37	TRUE
CG12079 CG12079-PA [Drosophila melanogaster]	gi|24656494	29953.1	1	5	7	22	0.000103	0.253	TRUE	S_E7.2972.2972.3.dta	NANPPAEVVPPQAPAK	R	-	0.95	32.3	36.6	1.47	2		533.789	1598.34	1599.85	3	-0.4969	-310.7	249	264	TRUE
Paramyosin CG5939-PA, isoform A [Drosophila melanogaster]	gi|24661112,gi|24661116	102322	1	39	51	578	0.0027	0.494	TRUE	S_E9.2836.2836.3.dta	RLENERDELTAAYK	R	E	0.95	32.4	36.6	2.09	2		569.934	1706.78	1707.87	3	-0.07931	-46.44	461	474	TRUE
Aconitase CG9244-PB, isoform B [Drosophila melanogaster]	gi|17864292	85383.5	1	27	37	473	0.00221	0.417	TRUE	S_F912.4926.4926.3.dta	cTTDHISAAGPWLK	K	Y	0.95	32.4	36.6	2.33	2	c1: Carbamidomethyl (+57.02)	519.693	1556.05	1556.75	3	0.3092	198.6	600	613	TRUE
Superoxide dismutase CG11793-PA [Drosophila melanogaster]	gi|17136496	15680	1	4	5	16	7.49e-05	0.34	TRUE	S_F5.4198.4198.3.dta	HLGDLGNIEATGDcPTK	R	V	0.95	32.4	36.4	1.59	2	c14: Carbamidomethyl (+57.02)	600.172	1797.49	1797.84	3	0.6559	364.7	79	95	TRUE
bent CG32019-PA, isoform A [Drosophila melanogaster]	gi|28558739,gi|45552153	1.00129e+06	1	118	128	787	0.00368	0.191	TRUE	S_G1.5147.5147.3.dta	SDGPEYNVDGLVPGHDYK	R	F	0.95	32.5	36.2	1.68	2		654.505	1960.49	1961.89	3	-0.3898	-198.7	4547	4564	TRUE
CG7470 CG7470-PA [Drosophila melanogaster]	gi|21357643	84075.9	1	12	16	101	0.000473	0.21	TRUE	A10.4123.4123.3.dta	IAQVLVTKPDFYNEETR	K	N	0.95	32.5	36.1	1.54	2		675.445	2023.31	2023.05	3	1.27	627.5	168	184	TRUE
Succinyl coenzyme A synthetase flavoprotein subunit CG17246-PA, isoform A [Drosophila melanogaster]	gi|17137288,gi|24655642,gi|24655647	72325.6	1	11	14	78	0.000365	0.25	TRUE	S_F910.3698.3698.3.dta	VREDEYDFSKPLDGQQK	K	K	0.95	32.5	36.3	2.08	2		685.683	2054.03	2053.98	3	1.05	511	597	613	TRUE
CG4769 CG4769-PA [Drosophila melanogaster]	gi|24658292	33747	1	8	10	37	0.000173	0.287	TRUE	S_F8.6015.6015.3.dta	GLFDALDHQSVR	K	R	0.95	32.5	37.2	2.01	2		453.293	1356.85	1357.69	3	0.176	129.6	81	92	TRUE
CG5482 CG5482-PA [Drosophila melanogaster]	gi|19922556	44845.3	1	5	5	13	6.08e-05	0.169	TRUE	A8.1081.1081.3.dta	KVAAEEAASGDGAPPASVSGDGQK	R	A	0.95	32.5	36.1	2.82	2		733.895	2198.66	2199.05	3	0.6154	279.8	25	48	TRUE
cornichon CG5855-PB, isoform B [Drosophila melanogaster]	gi|17137046,gi|24584585	16914.5	0.5	1	1	2	9.36e-06	0.0417	TRUE	S_A3Dros.1722.1722.2.dta	TDTLYR	K	N	0.95	32.5	34.9	0	2		384.599	767.182	768.389	2	-0.1998	-260.1	109	114	TRUE
CG1516 CG1516-PE, isoform E [Drosophila melanogaster]	gi|19921944,gi|24652210,gi|24652212,gi|24652214,gi|24652216,gi|24652218,gi|24652220,gi|24652222,gi|24652224	130848	1	36	39	469	0.00219	0.346	TRUE	S_F1.4175.4175.2.dta	LPIEIR	R	D	0.95	32.6	34.7	0	2		371.234	740.453	740.467	2	0.9933	1340	285	290	TRUE
Aconitase CG9244-PB, isoform B [Drosophila melanogaster]	gi|17864292	85383.5	1	27	37	473	0.00221	0.417	TRUE	S_F911.4845.4845.3.dta	VAVPSTVHcDHLIEAQIGGPK	K	D	0.95	32.6	36.2	0	2	c9: Carbamidomethyl (+57.02)	743.376	2227.11	2228.15	3	-0.03635	-16.32	125	145	TRUE
Oligomycin sensitivity-conferring protein CG4307-PA, isoform A [Drosophila melanogaster]	gi|24647054	22405.2	1	10	13	64	0.000299	0.455	TRUE	S_E6.5316.5316.1.dta	LYTDVIQTAA	K	-	0.95	32.6	35.9	0	2		1095.27	1094.26	1094.57	1	0.6961	635.5	200	209	TRUE
mitochondrial ribosomal protein S18B CG10757-PA, isoform A [Drosophila melanogaster]	gi|17647685,gi|24585392	23161.6	0.5	1	1	1	4.68e-06	0.142	TRUE	S_E6.2232.2232.3.dta	AETSTEENNAAATEGEGEDNASGSAPDPK	K	D	0.95	32.6	35.6	1.96	2		950.485	2848.43	2849.18	3	0.2569	90.15	33	61	TRUE
Calcium ATPase at 60A CG3725-PA, isoform A [Drosophila melanogaster]	gi|17136664,gi|24762445,gi|24762447,gi|24762449,gi|24762451,gi|24762453,gi|24762455,gi|24762457	109596	1	34	42	581	0.00272	0.346	TRUE	S_F910.6970.6970.3.dta	TVEQSLNFFGTDPERGLTLDQIK	K	A	0.95	32.7	35.9	0	2		870.307	2607.9	2608.33	3	0.5783	221.7	8	30	TRUE
Actin 87E CG18290-PA, isoform A [Drosophila melanogaster]	gi|17137090,gi|24646579	41784.9	1	15	24	417	0.00195	0.423	TRUE	S_F8.5411.5411.3.dta	VAPEEHPVLLTEAPLNPK	R	A	0.95	32.7	36.3	1.44	2		652.233	1953.68	1954.07	3	0.6183	316.3	97	114	TRUE	gi|17647135,gi|62473515,gi|62473526,gi|24639997,gi|17975540,gi|17530805
CG9090 CG9090-PA [Drosophila melanogaster]	gi|24656137	40535.9	1	13	16	119	0.000557	0.299	TRUE	S_E7.5198.5198.1.dta	TLELLYK	R	Y	0.95	32.7	35.8	0	2		880.484	879.476	879.519	1	0.9643	1095	251	257	TRUE
Actin 79B CG7478-PA [Drosophila melanogaster]	gi|17975540	41769.7	0.998	2	2	4	1.87e-05	0.388	FALSE	S_F8.5411.5411.3.dta	VAPEEHPVLLTEAPLNPK	R	A	0.95	32.7	36.3	1.44	2		652.233	1953.68	1954.07	3	0.6183	316.3	97	114	FALSE	gi|17647135,gi|62473515,gi|62473526,gi|24639997,gi|17530805,gi|17137090,gi|24646579
Actin 5C CG4027-PB, isoform B [Drosophila melanogaster]	gi|17530805,gi|24639997,gi|62473515,gi|62473526	41804.7	0.998	2	3	13	6.08e-05	0.364	FALSE	S_F8.5411.5411.3.dta	VAPEEHPVLLTEAPLNPK	R	A	0.95	32.7	36.3	1.44	2		652.233	1953.68	1954.07	3	0.6183	316.3	97	114	FALSE	gi|17647135,gi|17975540,gi|17137090,gi|24646579
Actin 57B CG10067-PA, isoform A [Drosophila melanogaster]	gi|17647135	41817.9	0.5	1	2	54	0.000253	0.423	FALSE	S_F8.5411.5411.3.dta	VAPEEHPVLLTEAPLNPK	R	A	0.95	32.7	36.3	1.44	2		652.233	1953.68	1954.07	3	0.6183	316.3	97	114	FALSE	gi|62473515,gi|62473526,gi|24639997,gi|17975540,gi|17530805,gi|17137090,gi|24646579
Myosin heavy chain CG17927-PA, isoform A [Drosophila melanogaster]	gi|24584704,gi|28574239	224597	1	128	186	2330	0.0109	0.549	TRUE	S_F2.3554.3554.3.dta	HNDAVAEmAEQVDQLNK	K	L	0.95	32.8	36.3	0	2	m8: Oxidation (+15.99)	643.15	1926.43	1927.88	3	-0.4485	-232.7	1195	1211	TRUE	gi|24584700,gi|24584706,gi|24584710,gi|24584702,gi|24584712,gi|24584698
terribly reduced optic lobes CG33950-PF, isoform F [Drosophila melanogaster]	gi|78706474	513388	1	89	107	871	0.00408	0.237	TRUE	S_F1.6428.6428.3.dta	ATNVHFSGRETPYLALPADYmGNQLK	R	S	0.95	32.8	35.8	0	2	m21: Oxidation (+15.99)	970.303	2907.88	2909.43	3	-0.5332	-183.3	1914	1939	TRUE	gi|161077537
Cytochrome P450-4g1 CG3972-PA [Drosophila melanogaster]	gi|17933498	62954.7	1	24	31	601	0.00281	0.39	TRUE	S_F911.4827.4827.3.dta	SFVPTFVDHSK	K	A	0.95	32.8	36.6	1.89	2		421.857	1262.55	1263.64	3	-0.0819	-64.82	166	176	TRUE
Cytochrome P450-4g1 CG3972-PA [Drosophila melanogaster]	gi|17933498	62954.7	1	24	31	601	0.00281	0.39	TRUE	S_E912.4844.4844.3.dta	SFVPTFVDHSK	K	A	0.95	32.8	36.6	1.59	2		421.897	1262.67	1263.64	3	0.0393	31.1	166	176	TRUE
pericardin CG5700-PB [Drosophila melanogaster]	gi|24663043	163475	1	14	18	215	0.00101	0.114	TRUE	A9.2815.2815.3.dta	GQTQSQYLNFGKPEEDGK	R	A	0.95	32.8	36.3	0	2		675.874	2024.6	2025.95	3	-0.3465	-171.1	47	64	TRUE
CG7470 CG7470-PA [Drosophila melanogaster]	gi|21357643	84075.9	1	12	16	101	0.000473	0.21	TRUE	S_E8.6555.6555.3.dta	LASIVEQVAEcHLEGR	R	E	0.95	32.8	36.3	0	2	c11: Carbamidomethyl (+57.02)	604.6	1810.78	1810.91	3	0.8734	482.1	81	96	TRUE
Myosin heavy chain CG17927-PF, isoform F [Drosophila melanogaster]	gi|24584700	224516	0.998	2	2	20	9.36e-05	0.548	FALSE	S_F2.3554.3554.3.dta	HNDAVAEmAEQVDQLNK	K	L	0.95	32.8	36.3	0	2	m8: Oxidation (+15.99)	643.15	1926.43	1927.88	3	-0.4485	-232.7	1195	1211	FALSE	gi|24584704,gi|28574239,gi|24584706,gi|24584710,gi|24584702,gi|24584712,gi|24584698
Myosin heavy chain CG17927-PB, isoform B [Drosophila melanogaster]	gi|24584710	224397	0.998	2	2	9	4.21e-05	0.534	FALSE	S_F2.3554.3554.3.dta	HNDAVAEmAEQVDQLNK	K	L	0.95	32.8	36.3	0	2	m8: Oxidation (+15.99)	643.15	1926.43	1927.88	3	-0.4485	-232.7	1195	1211	FALSE	gi|24584704,gi|24584700,gi|28574239,gi|24584706,gi|24584702,gi|24584712,gi|24584698
Myosin heavy chain CG17927-PJ, isoform J [Drosophila melanogaster]	gi|24584698	224394	0.998	2	2	3	1.4e-05	0.541	FALSE	S_F2.3554.3554.3.dta	HNDAVAEmAEQVDQLNK	K	L	0.95	32.8	36.3	0	2	m8: Oxidation (+15.99)	643.15	1926.43	1927.88	3	-0.4485	-232.7	1193	1209	FALSE	gi|24584704,gi|24584700,gi|28574239,gi|24584706,gi|24584710,gi|24584702,gi|24584712
terribly reduced optic lobes CG33950-PG, isoform G [Drosophila melanogaster]	gi|161077537	459070	0.5	1	1	4	1.87e-05	0.256	FALSE	S_F1.6428.6428.3.dta	ATNVHFSGRETPYLALPADYmGNQLK	R	S	0.95	32.8	35.8	0	2	m21: Oxidation (+15.99)	970.303	2907.88	2909.43	3	-0.5332	-183.3	1441	1466	FALSE	gi|78706474
Myosin heavy chain CG17927-PK, isoform K [Drosophila melanogaster]	gi|24584712	221394	0.993	1	1	1	4.68e-06	0.52	FALSE	S_F2.3554.3554.3.dta	HNDAVAEmAEQVDQLNK	K	L	0.95	32.8	36.3	0	2	m8: Oxidation (+15.99)	643.15	1926.43	1927.88	3	-0.4485	-232.7	1195	1211	FALSE	gi|24584704,gi|24584700,gi|28574239,gi|24584706,gi|24584710,gi|24584702,gi|24584698
Myosin heavy chain CG17927-PD, isoform D [Drosophila melanogaster]	gi|24584702,gi|24584706	224480	0.994	1	1	38	0.000178	0.544	FALSE	S_F2.3554.3554.3.dta	HNDAVAEmAEQVDQLNK	K	L	0.95	32.8	36.3	0	2	m8: Oxidation (+15.99)	643.15	1926.43	1927.88	3	-0.4485	-232.7	1195	1211	FALSE	gi|24584704,gi|24584700,gi|28574239,gi|24584710,gi|24584712,gi|24584698
Myosin heavy chain CG17927-PA, isoform A [Drosophila melanogaster]	gi|24584704,gi|28574239	224597	1	128	186	2330	0.0109	0.549	TRUE	S_A12Dros.1388.1388.3.dta	AGVDHITNEK	R	A	0.95	32.9	36	0	2		361.863	1082.57	1083.54	3	0.0299	27.6	1232	1241	TRUE	gi|24584700,gi|24584706,gi|24584702,gi|24584698
bent CG32019-PA, isoform A [Drosophila melanogaster]	gi|28558739,gi|45552153	1.00129e+06	1	118	128	787	0.00368	0.191	TRUE	S_E8.2929.2929.3.dta	GGPSDPSDPSSTIIcKPR	R	F	0.95	32.9	36.4	2.32	2	c15: Carbamidomethyl (+57.02)	624.611	1870.81	1870.9	3	0.9202	491.6	5559	5576	TRUE
Papilin CG33103-PA, isoform A [Drosophila melanogaster]	gi|28572036	312636	1	51	58	438	0.00205	0.228	TRUE	S_G3.2660.2660.3.dta	SVNcDEEKVEPLSEK	K	C	0.95	32.9	36.5	0	2	c4: Carbamidomethyl (+57.02)	588.275	1761.8	1762.82	3	-0.00757	-4.294	673	687	TRUE
Cytochrome P450-4g1 CG3972-PA [Drosophila melanogaster]	gi|17933498	62954.7	1	24	31	601	0.00281	0.39	TRUE	S_G1.4746.4746.3.dta	SFVPTFVDHSK	K	A	0.95	32.9	36.6	1.74	2		421.981	1262.92	1263.64	3	0.291	230.2	166	176	TRUE
Myosin heavy chain CG17927-PF, isoform F [Drosophila melanogaster]	gi|24584700	224516	0.998	2	2	20	9.36e-05	0.548	FALSE	S_A12Dros.1388.1388.3.dta	AGVDHITNEK	R	A	0.95	32.9	36	0	2		361.863	1082.57	1083.54	3	0.0299	27.6	1232	1241	FALSE	gi|24584704,gi|28574239,gi|24584706,gi|24584702,gi|24584698
Eukaryotic initiation factor 4E CG4035-PB, isoform B [Drosophila melanogaster]	gi|17864468,gi|24661542,gi|24661546,gi|24661553,gi|24661557,gi|24661561,gi|24661565	29206.7	0.998	2	3	21	9.83e-05	0.193	TRUE	S_F911.2279.2279.3.dta	TSAPSTEQGRPEPPTSAAAPAEAK	K	D	0.95	32.9	36	3.89	2		784.566	2350.67	2351.15	3	0.5332	226.7	20	43	TRUE
Myosin heavy chain CG17927-PJ, isoform J [Drosophila melanogaster]	gi|24584698	224394	0.998	2	2	3	1.4e-05	0.541	FALSE	S_A12Dros.1388.1388.3.dta	AGVDHITNEK	R	A	0.95	32.9	36	0	2		361.863	1082.57	1083.54	3	0.0299	27.6	1230	1239	FALSE	gi|24584704,gi|24584700,gi|28574239,gi|24584706,gi|24584702
Myosin heavy chain CG17927-PD, isoform D [Drosophila melanogaster]	gi|24584702,gi|24584706	224480	0.994	1	1	38	0.000178	0.544	FALSE	S_A12Dros.1388.1388.3.dta	AGVDHITNEK	R	A	0.95	32.9	36	0	2		361.863	1082.57	1083.54	3	0.0299	27.6	1232	1241	FALSE	gi|24584704,gi|24584700,gi|28574239,gi|24584698
Myosin heavy chain CG17927-PA, isoform A [Drosophila melanogaster]	gi|24584704,gi|28574239	224597	1	128	186	2330	0.0109	0.549	TRUE	S_A7Dros.1389.1389.3.dta	KAEELHAAEVK	K	V	0.95	33	36	0	2		408.861	1223.56	1224.66	3	-0.09051	-73.91	857	867	TRUE	gi|24584700,gi|24584706,gi|24584710,gi|24584702,gi|24584712,gi|24584698
Myosin heavy chain CG17927-PA, isoform A [Drosophila melanogaster]	gi|24584704,gi|28574239	224597	1	128	186	2330	0.0109	0.549	TRUE	A9.1104.1104.3.dta	QLQHTLNEVQSK	K	L	0.95	33	36.3	0	2		475.551	1423.63	1424.75	3	-0.1124	-78.88	1250	1261	TRUE	gi|24584700,gi|24584706,gi|24584710,gi|24584702,gi|24584712,gi|24584698
Myosin heavy chain CG17927-PA, isoform A [Drosophila melanogaster]	gi|24584704,gi|28574239	224597	1	128	186	2330	0.0109	0.549	TRUE	S_G1.6383.6383.3.dta	ATSVRPQFDGLAFPPR	R	F	0.95	33	36.4	1.26	2		586.895	1757.66	1758.93	3	-0.2598	-147.7	1938	1953	TRUE	gi|24584700,gi|24584706,gi|24584710,gi|24584702,gi|24584698
zormin CG33484-PD, isoform D [Drosophila melanogaster]	gi|116007762	411353	1	35	37	226	0.00106	0.131	TRUE	S_F2.5017.5017.3.dta	LPPGNELVIPVQHER	K	S	0.95	33	36.5	1.35	2		566.622	1696.84	1697.93	3	-0.0845	-49.77	3448	3462	TRUE
alpha actinin CG4376-PC, isoform C [Drosophila melanogaster]	gi|17137758	106358	1	31	34	241	0.00113	0.381	TRUE	S_F912.6430.6430.3.dta	ILAADKPYILPDELR	R	R	0.95	33	36.5	1.32	2		576.204	1725.59	1726.97	3	-0.3791	-219.6	860	874	TRUE
upheld CG7107-PF, isoform F [Drosophila melanogaster]	gi|62473664	47113.5	1	17	23	236	0.0011	0.405	FALSE	S_F2.3119.3119.3.dta	AEEEQKmAQRKK	R	E	0.95	33	36.4	0	2	m7: Oxidation (+15.99)	498.213	1491.62	1491.76	3	0.8644	579.1	83	94	FALSE	gi|62473654,gi|78706474,gi|24641813
Myosin light chain 2 CG2184-PA, isoform A [Drosophila melanogaster]	gi|17933672	23697.5	1	11	15	196	0.000917	0.518	TRUE	A6.3914.3915.3.dta	TFDNDGLIDGDKFR	K	E	0.95	33	36.5	0	2		538.527	1612.56	1612.76	3	0.8044	498.5	158	171	TRUE
Receptor of activated protein kinase C 1 CG7111-PA [Drosophila melanogaster]	gi|17137396	35600.2	1	9	13	29	0.000136	0.28	TRUE	S_E8.5452.5452.3.dta	FSPNHSNPIIVScGWDR	R	T	0.95	33	36.5	0	2	c13: Carbamidomethyl (+57.02)	662.544	1984.61	1985.93	3	-0.3119	-157.1	157	173	TRUE
CG3074 CG3074-PA, isoform A [Drosophila melanogaster]	gi|24657813,gi|24657819	48768.3	1	8	13	44	0.000206	0.213	TRUE	S_F910.2891.2891.3.dta	GVVDENcYPYTQHR	K	D	0.95	33	36.2	0	2	c7: Carbamidomethyl (+57.02)	580.179	1737.51	1737.77	3	0.7551	434.3	269	282	TRUE
CG8036 CG8036-PD, isoform D [Drosophila melanogaster]	gi|24645119,gi|45550715,gi|45551847	63026.6	1	5	5	18	8.42e-05	0.131	TRUE	A9.1064.1064.3.dta	KIDSDLEGHPTPR	R	L	0.95	33	36.5	0	2		489.062	1464.16	1464.74	3	0.4246	289.8	55	67	TRUE
Myosin heavy chain CG17927-PF, isoform F [Drosophila melanogaster]	gi|24584700	224516	0.998	2	2	20	9.36e-05	0.548	FALSE	S_A7Dros.1389.1389.3.dta	KAEELHAAEVK	K	V	0.95	33	36	0	2		408.861	1223.56	1224.66	3	-0.09051	-73.91	857	867	FALSE	gi|24584704,gi|28574239,gi|24584706,gi|24584710,gi|24584702,gi|24584712,gi|24584698
Myosin heavy chain CG17927-PF, isoform F [Drosophila melanogaster]	gi|24584700	224516	0.998	2	2	20	9.36e-05	0.548	FALSE	A9.1104.1104.3.dta	QLQHTLNEVQSK	K	L	0.95	33	36.3	0	2		475.551	1423.63	1424.75	3	-0.1124	-78.88	1250	1261	FALSE	gi|24584704,gi|28574239,gi|24584706,gi|24584710,gi|24584702,gi|24584712,gi|24584698
Myosin heavy chain CG17927-PF, isoform F [Drosophila melanogaster]	gi|24584700	224516	0.998	2	2	20	9.36e-05	0.548	FALSE	S_G1.6383.6383.3.dta	ATSVRPQFDGLAFPPR	R	F	0.95	33	36.4	1.26	2		586.895	1757.66	1758.93	3	-0.2598	-147.7	1938	1953	FALSE	gi|24584704,gi|28574239,gi|24584706,gi|24584710,gi|24584702,gi|24584698
Myosin heavy chain CG17927-PB, isoform B [Drosophila melanogaster]	gi|24584710	224397	0.998	2	2	9	4.21e-05	0.534	FALSE	S_A7Dros.1389.1389.3.dta	KAEELHAAEVK	K	V	0.95	33	36	0	2		408.861	1223.56	1224.66	3	-0.09051	-73.91	857	867	FALSE	gi|24584704,gi|24584700,gi|28574239,gi|24584706,gi|24584702,gi|24584712,gi|24584698
Myosin heavy chain CG17927-PB, isoform B [Drosophila melanogaster]	gi|24584710	224397	0.998	2	2	9	4.21e-05	0.534	FALSE	A9.1104.1104.3.dta	QLQHTLNEVQSK	K	L	0.95	33	36.3	0	2		475.551	1423.63	1424.75	3	-0.1124	-78.88	1250	1261	FALSE	gi|24584704,gi|24584700,gi|28574239,gi|24584706,gi|24584702,gi|24584712,gi|24584698
Myosin heavy chain CG17927-PB, isoform B [Drosophila melanogaster]	gi|24584710	224397	0.998	2	2	9	4.21e-05	0.534	FALSE	S_G1.6383.6383.3.dta	ATSVRPQFDGLAFPPR	R	F	0.95	33	36.4	1.26	2		586.895	1757.66	1758.93	3	-0.2598	-147.7	1938	1953	FALSE	gi|24584704,gi|24584700,gi|28574239,gi|24584706,gi|24584702,gi|24584698
wings up A CG7178-PG, isoform G [Drosophila melanogaster]	gi|24642963	30064.7	1	2	3	4	1.87e-05	0.275	TRUE	A7.1014.1014.3.dta	AAPAAAAAPAGPPKDPNDPK	K	V	0.95	33	36.5	2.6	2		609.689	1826.04	1826.94	3	0.1102	60.3	42	61	TRUE
upheld CG7107-PA, isoform A [Drosophila melanogaster]	gi|24641813	47430.7	0.998	2	2	17	7.95e-05	0.408	FALSE	S_F2.3119.3119.3.dta	AEEEQKmAQRKK	R	E	0.95	33	36.4	0	2	m7: Oxidation (+15.99)	498.213	1491.62	1491.76	3	0.8644	579.1	86	97	FALSE	gi|62473654,gi|78706474,gi|62473664
Myosin heavy chain CG17927-PJ, isoform J [Drosophila melanogaster]	gi|24584698	224394	0.998	2	2	3	1.4e-05	0.541	FALSE	S_A7Dros.1389.1389.3.dta	KAEELHAAEVK	K	V	0.95	33	36	0	2		408.861	1223.56	1224.66	3	-0.09051	-73.91	855	865	FALSE	gi|24584704,gi|24584700,gi|28574239,gi|24584706,gi|24584710,gi|24584702,gi|24584712
Myosin heavy chain CG17927-PJ, isoform J [Drosophila melanogaster]	gi|24584698	224394	0.998	2	2	3	1.4e-05	0.541	FALSE	A9.1104.1104.3.dta	QLQHTLNEVQSK	K	L	0.95	33	36.3	0	2		475.551	1423.63	1424.75	3	-0.1124	-78.88	1248	1259	FALSE	gi|24584704,gi|24584700,gi|28574239,gi|24584706,gi|24584710,gi|24584702,gi|24584712
Myosin heavy chain CG17927-PJ, isoform J [Drosophila melanogaster]	gi|24584698	224394	0.998	2	2	3	1.4e-05	0.541	FALSE	S_G1.6383.6383.3.dta	ATSVRPQFDGLAFPPR	R	F	0.95	33	36.4	1.26	2		586.895	1757.66	1758.93	3	-0.2598	-147.7	1936	1951	FALSE	gi|24584704,gi|24584700,gi|28574239,gi|24584706,gi|24584710,gi|24584702
upheld CG7107-PG, isoform G [Drosophila melanogaster]	gi|62473654	47331.6	0.986	1	1	1	4.68e-06	0.407	FALSE	S_F2.3119.3119.3.dta	AEEEQKmAQRKK	R	E	0.95	33	36.4	0	2	m7: Oxidation (+15.99)	498.213	1491.62	1491.76	3	0.8644	579.1	86	97	FALSE	gi|78706474,gi|24641813,gi|62473664
Myosin heavy chain CG17927-PK, isoform K [Drosophila melanogaster]	gi|24584712	221394	0.993	1	1	1	4.68e-06	0.52	FALSE	S_A7Dros.1389.1389.3.dta	KAEELHAAEVK	K	V	0.95	33	36	0	2		408.861	1223.56	1224.66	3	-0.09051	-73.91	857	867	FALSE	gi|24584704,gi|24584700,gi|28574239,gi|24584706,gi|24584710,gi|24584702,gi|24584698
Myosin heavy chain CG17927-PK, isoform K [Drosophila melanogaster]	gi|24584712	221394	0.993	1	1	1	4.68e-06	0.52	FALSE	A9.1104.1104.3.dta	QLQHTLNEVQSK	K	L	0.95	33	36.3	0	2		475.551	1423.63	1424.75	3	-0.1124	-78.88	1250	1261	FALSE	gi|24584704,gi|24584700,gi|28574239,gi|24584706,gi|24584710,gi|24584702,gi|24584698
Myosin heavy chain CG17927-PD, isoform D [Drosophila melanogaster]	gi|24584702,gi|24584706	224480	0.994	1	1	38	0.000178	0.544	FALSE	S_A7Dros.1389.1389.3.dta	KAEELHAAEVK	K	V	0.95	33	36	0	2		408.861	1223.56	1224.66	3	-0.09051	-73.91	857	867	FALSE	gi|24584704,gi|24584700,gi|28574239,gi|24584710,gi|24584712,gi|24584698
Myosin heavy chain CG17927-PD, isoform D [Drosophila melanogaster]	gi|24584702,gi|24584706	224480	0.994	1	1	38	0.000178	0.544	FALSE	A9.1104.1104.3.dta	QLQHTLNEVQSK	K	L	0.95	33	36.3	0	2		475.551	1423.63	1424.75	3	-0.1124	-78.88	1250	1261	FALSE	gi|24584704,gi|24584700,gi|28574239,gi|24584710,gi|24584712,gi|24584698
Myosin heavy chain CG17927-PD, isoform D [Drosophila melanogaster]	gi|24584702,gi|24584706	224480	0.994	1	1	38	0.000178	0.544	FALSE	S_G1.6383.6383.3.dta	ATSVRPQFDGLAFPPR	R	F	0.95	33	36.4	1.26	2		586.895	1757.66	1758.93	3	-0.2598	-147.7	1938	1953	FALSE	gi|24584704,gi|24584700,gi|28574239,gi|24584710,gi|24584698
Myosin heavy chain CG17927-PA, isoform A [Drosophila melanogaster]	gi|24584704,gi|28574239	224597	1	128	186	2330	0.0109	0.549	TRUE	S_A10Dros.1389.1389.3.dta	AGVDHITNEK	R	A	0.95	33.1	36	0	2		361.857	1082.55	1083.54	3	0.0119	10.98	1232	1241	TRUE	gi|24584700,gi|24584706,gi|24584702,gi|24584698
Myosin heavy chain CG17927-PA, isoform A [Drosophila melanogaster]	gi|24584704,gi|28574239	224597	1	128	186	2330	0.0109	0.549	TRUE	A9.3453.3453.3.dta	NLNDEIAHQDELINK	R	L	0.95	33.1	36.5	0	2		589.2	1764.58	1765.87	3	-0.2869	-162.5	976	990	TRUE	gi|24584700,gi|24584706,gi|24584710,gi|24584702,gi|24584712,gi|24584698
bent CG32019-PA, isoform A [Drosophila melanogaster]	gi|28558739,gi|45552153	1.00129e+06	1	118	128	787	0.00368	0.191	TRUE	A10.1941.1941.3.dta	GGPSDPSDPSSTIIcKPR	R	F	0.95	33.1	36.4	0	2	c15: Carbamidomethyl (+57.02)	624.452	1870.33	1870.9	3	0.4432	236.9	5559	5576	TRUE
Paramyosin CG5939-PA, isoform A [Drosophila melanogaster]	gi|24661112,gi|24661116	102322	1	39	51	578	0.0027	0.494	TRUE	A10.1081.1081.3.dta	QLSEQEGVSQQTTTR	R	V	0.95	33.1	36.4	0	2		564.478	1690.41	1691.82	3	-0.4008	-236.9	811	825	TRUE	gi|24661124,gi|24661120
CG4389 CG4389-PB, isoform B [Drosophila melanogaster]	gi|24583077,gi|24583079	79622	1	27	31	210	0.000983	0.423	TRUE	S_E911.6861.6861.3.dta	DQTLASLRPTLDYSDFK	R	N	0.95	33.1	36.3	3.28	2		657.53	1969.57	1969.99	3	0.5871	297.9	396	412	TRUE
Cytochrome P450 reductase CG11567-PA, isoform A [Drosophila melanogaster]	gi|17137192	76331.1	1	18	20	177	0.000828	0.321	TRUE	S_F911.5460.5460.3.dta	ScRPPIDHVcELLPR	K	L	0.95	33.1	36.2	0	2	c2: Carbamidomethyl (+57.02), c10: Carbamidomethyl (+57.02)	617.179	1848.51	1848.92	3	0.5991	323.9	440	454	TRUE
Ribosomal protein S3 CG6779-PA [Drosophila melanogaster]	gi|17136324	27453.7	1	15	16	63	0.000295	0.642	TRUE	S_E7.3337.3337.3.dta	KPLPDNVSVVEPK	K	E	0.95	33.1	36.5	2.14	2		474.559	1420.65	1421.8	3	-0.1382	-97.21	204	216	TRUE
Actin 87E CG18290-PA, isoform A [Drosophila melanogaster]	gi|17137090,gi|24646579	41784.9	1	15	24	417	0.00195	0.423	TRUE	S_G3.5492.5492.3.dta	VAPEEHPVLLTEAPLNPK	R	A	0.95	33.1	36.2	0	2		652.274	1953.8	1954.07	3	0.7425	379.8	97	114	TRUE	gi|17647135,gi|62473515,gi|62473526,gi|24639997,gi|17975540,gi|17530805
ATP synthase, subunit d CG6030-PA, isoform A [Drosophila melanogaster]	gi|17738043,gi|24648125	20182.9	1	8	10	36	0.000168	0.404	TRUE	S_E6.7172.7172.3.dta	LVPVAGLVDSFQK	K	Q	0.95	33.1	36.6	1.52	2		458.042	1371.1	1372.78	3	-0.6728	-490.3	60	72	TRUE
CG4572 CG4572-PB, isoform B [Drosophila melanogaster]	gi|21356389,gi|24648272,gi|24648275	54368.4	1	4	5	11	5.15e-05	0.11	TRUE	S_A6Dros.1887.1887.2.dta	VELHLK	K	K	0.95	33.1	35.5	0	2		369.585	737.154	738.452	2	-0.29	-392.9	370	375	TRUE
Myosin heavy chain CG17927-PF, isoform F [Drosophila melanogaster]	gi|24584700	224516	0.998	2	2	20	9.36e-05	0.548	FALSE	S_A10Dros.1389.1389.3.dta	AGVDHITNEK	R	A	0.95	33.1	36	0	2		361.857	1082.55	1083.54	3	0.0119	10.98	1232	1241	FALSE	gi|24584704,gi|28574239,gi|24584706,gi|24584702,gi|24584698
Myosin heavy chain CG17927-PF, isoform F [Drosophila melanogaster]	gi|24584700	224516	0.998	2	2	20	9.36e-05	0.548	FALSE	A9.3453.3453.3.dta	NLNDEIAHQDELINK	R	L	0.95	33.1	36.5	0	2		589.2	1764.58	1765.87	3	-0.2869	-162.5	976	990	FALSE	gi|24584704,gi|28574239,gi|24584706,gi|24584710,gi|24584702,gi|24584712,gi|24584698
Myosin heavy chain CG17927-PB, isoform B [Drosophila melanogaster]	gi|24584710	224397	0.998	2	2	9	4.21e-05	0.534	FALSE	A9.3453.3453.3.dta	NLNDEIAHQDELINK	R	L	0.95	33.1	36.5	0	2		589.2	1764.58	1765.87	3	-0.2869	-162.5	976	990	FALSE	gi|24584704,gi|24584700,gi|28574239,gi|24584706,gi|24584702,gi|24584712,gi|24584698
Paramyosin CG5939-PC, isoform C [Drosophila melanogaster]	gi|24661120,gi|24661124	74260.8	0.998	2	3	11	5.15e-05	0.375	FALSE	A10.1081.1081.3.dta	QLSEQEGVSQQTTTR	R	V	0.95	33.1	36.4	0	2		564.478	1690.41	1691.82	3	-0.4008	-236.9	572	586	FALSE	gi|24661116,gi|24661112
Actin 79B CG7478-PA [Drosophila melanogaster]	gi|17975540	41769.7	0.998	2	2	4	1.87e-05	0.388	FALSE	S_G3.5492.5492.3.dta	VAPEEHPVLLTEAPLNPK	R	A	0.95	33.1	36.2	0	2		652.274	1953.8	1954.07	3	0.7425	379.8	97	114	FALSE	gi|17647135,gi|62473515,gi|62473526,gi|24639997,gi|17530805,gi|17137090,gi|24646579
Myosin heavy chain CG17927-PJ, isoform J [Drosophila melanogaster]	gi|24584698	224394	0.998	2	2	3	1.4e-05	0.541	FALSE	S_A10Dros.1389.1389.3.dta	AGVDHITNEK	R	A	0.95	33.1	36	0	2		361.857	1082.55	1083.54	3	0.0119	10.98	1230	1239	FALSE	gi|24584704,gi|24584700,gi|28574239,gi|24584706,gi|24584702
Myosin heavy chain CG17927-PJ, isoform J [Drosophila melanogaster]	gi|24584698	224394	0.998	2	2	3	1.4e-05	0.541	FALSE	A9.3453.3453.3.dta	NLNDEIAHQDELINK	R	L	0.95	33.1	36.5	0	2		589.2	1764.58	1765.87	3	-0.2869	-162.5	974	988	FALSE	gi|24584704,gi|24584700,gi|28574239,gi|24584706,gi|24584710,gi|24584702,gi|24584712
Actin 5C CG4027-PB, isoform B [Drosophila melanogaster]	gi|17530805,gi|24639997,gi|62473515,gi|62473526	41804.7	0.998	2	3	13	6.08e-05	0.364	FALSE	S_G3.5492.5492.3.dta	VAPEEHPVLLTEAPLNPK	R	A	0.95	33.1	36.2	0	2		652.274	1953.8	1954.07	3	0.7425	379.8	97	114	FALSE	gi|17647135,gi|17975540,gi|17137090,gi|24646579
Actin 57B CG10067-PA, isoform A [Drosophila melanogaster]	gi|17647135	41817.9	0.5	1	2	54	0.000253	0.423	FALSE	S_F9.2443.2443.3.dta	EEYDESGPGIVHR	K	K	0.95	33.1	36.6	0	2		496.739	1487.19	1487.68	3	0.5247	352.6	361	373	FALSE	gi|17975540,gi|17137090,gi|24646579
Actin 57B CG10067-PA, isoform A [Drosophila melanogaster]	gi|17647135	41817.9	0.5	1	2	54	0.000253	0.423	FALSE	S_G3.5492.5492.3.dta	VAPEEHPVLLTEAPLNPK	R	A	0.95	33.1	36.2	0	2		652.274	1953.8	1954.07	3	0.7425	379.8	97	114	FALSE	gi|62473515,gi|62473526,gi|24639997,gi|17975540,gi|17530805,gi|17137090,gi|24646579
Myosin heavy chain CG17927-PK, isoform K [Drosophila melanogaster]	gi|24584712	221394	0.993	1	1	1	4.68e-06	0.52	FALSE	A9.3453.3453.3.dta	NLNDEIAHQDELINK	R	L	0.95	33.1	36.5	0	2		589.2	1764.58	1765.87	3	-0.2869	-162.5	976	990	FALSE	gi|24584704,gi|24584700,gi|28574239,gi|24584706,gi|24584710,gi|24584702,gi|24584698
Myosin heavy chain CG17927-PD, isoform D [Drosophila melanogaster]	gi|24584702,gi|24584706	224480	0.994	1	1	38	0.000178	0.544	FALSE	S_A10Dros.1389.1389.3.dta	AGVDHITNEK	R	A	0.95	33.1	36	0	2		361.857	1082.55	1083.54	3	0.0119	10.98	1232	1241	FALSE	gi|24584704,gi|24584700,gi|28574239,gi|24584698
Myosin heavy chain CG17927-PD, isoform D [Drosophila melanogaster]	gi|24584702,gi|24584706	224480	0.994	1	1	38	0.000178	0.544	FALSE	A9.3453.3453.3.dta	NLNDEIAHQDELINK	R	L	0.95	33.1	36.5	0	2		589.2	1764.58	1765.87	3	-0.2869	-162.5	976	990	FALSE	gi|24584704,gi|24584700,gi|28574239,gi|24584710,gi|24584712,gi|24584698
Myosin heavy chain CG17927-PA, isoform A [Drosophila melanogaster]	gi|24584704,gi|28574239	224597	1	128	186	2330	0.0109	0.549	TRUE	S_A11Dros.2910.2910.3.dta	NLNDEIAHQDELINK	R	L	0.95	33.2	36.5	0	2		589.291	1764.85	1765.87	3	-0.0139	-7.869	976	990	TRUE	gi|24584700,gi|24584706,gi|24584710,gi|24584702,gi|24584712,gi|24584698
Myosin heavy chain CG17927-PA, isoform A [Drosophila melanogaster]	gi|24584704,gi|28574239	224597	1	128	186	2330	0.0109	0.549	TRUE	S_E912.7235.7235.3.dta	SKGSLEDQVVQTNPVLEAFGNAK	K	T	0.95	33.2	35.9	1.25	2		811.357	2431.05	2431.25	3	0.8093	332.8	211	233	TRUE	gi|24584700,gi|24584706,gi|24584710,gi|24584702,gi|24584712,gi|24584698
Paramyosin CG5939-PA, isoform A [Drosophila melanogaster]	gi|24661112,gi|24661116	102322	1	39	51	578	0.0027	0.494	TRUE	S_F912.3008.3008.3.dta	RLENERDELTAAYK	R	E	0.95	33.2	36.6	2.23	2		570.351	1708.03	1707.87	3	1.172	685.6	461	474	TRUE
Larval serum protein 1 gamma CG6821-PA [Drosophila melanogaster]	gi|17647601	93395.1	1	24	29	120	0.000561	0.31	TRUE	A4.2714.2714.2.dta	LGALLPK	K	G	0.95	33.2	34.7	0	2		356.673	711.331	711.477	2	0.8614	1209	84	90	TRUE
pericardin CG5700-PB [Drosophila melanogaster]	gi|24663043	163475	1	14	18	215	0.00101	0.114	TRUE	S_F911.3058.3058.3.dta	ASSQSGGIIQQSQSEVHANDK	K	G	0.95	33.2	36.3	0	2		724.239	2169.69	2171.03	3	-0.3324	-153.1	1336	1356	TRUE
Zeelin1 CG6803-PB, isoform B [Drosophila melanogaster]	gi|21357797	41650.6	1	13	14	71	0.000332	0.405	TRUE	A7.3391.3391.2.dta	YGLYLR	R	D	0.95	33.2	35.5	0	2		392.7	783.385	784.436	2	-0.04331	-55.22	129	134	TRUE
ERp60 CG8983-PA, isoform A [Drosophila melanogaster]	gi|45551086	55354.5	1	11	12	72	0.000337	0.28	TRUE	S_A9Dros.2117.2117.3.dta	AAEIVKDDDPPIK	K	L	0.95	33.2	36.4	0	2		470.964	1409.87	1410.75	3	0.1281	90.79	64	76	TRUE
CG10097 CG10097-PB, isoform B [Drosophila melanogaster]	gi|78706758	56986.7	1	11	14	80	0.000374	0.271	TRUE	S_E912.2931.2931.3.dta	VLDmHNSVSSETFEK	K	M	0.95	33.2	36.2	0	2	m4: Oxidation (+15.99)	580.444	1738.31	1738.8	3	0.5198	298.8	179	193	TRUE
CG10097 CG10097-PB, isoform B [Drosophila melanogaster]	gi|78706758	56986.7	1	11	14	80	0.000374	0.271	TRUE	S_E9.4919.4919.3.dta	MTPISGDccAPDLGISETDRR	K	I	0.95	33.2	36	1.82	2	c8: Carbamidomethyl (+57.02), c9: Carbamidomethyl (+57.02)	784.517	2350.53	2351.04	3	0.4912	208.9	79	99	TRUE
Catalase CG6871-PA [Drosophila melanogaster]	gi|17981717	57132.4	1	10	11	74	0.000346	0.263	TRUE	S_A9Dros.3747.3747.3.dta	DPILFPSFIHTQK	R	R	0.95	33.2	36.7	0	2		515.404	1543.19	1542.83	3	1.364	883.4	155	167	TRUE
myospheroid CG1560-PA [Drosophila melanogaster]	gi|24640486	92638.1	1	7	7	17	7.95e-05	0.122	TRUE	A7.952.952.3.dta	mNAKWDTGENPIYK	R	Q	0.95	33.2	36.5	0	2	m1: Oxidation (+15.99)	561.703	1682.09	1682.79	3	0.3085	183.3	819	832	TRUE
Cuticular protein 64Ad CG1259-PB [Drosophila melanogaster]	gi|21355869	24260.9	1	5	5	19	8.89e-05	0.279	TRUE	S_E6.4993.4993.1.dta	TLAAPIVA	K	-	0.95	33.2	35	0	2		755.389	754.381	755.467	1	-0.07825	-103.6	240	247	TRUE
Tudor-SN CG7008-PA [Drosophila melanogaster]	gi|20130403	103083	1	4	4	7	3.28e-05	0.0648	TRUE	S_G1.6026.6026.3.dta	EGRPTAEQQTLIELEDQAR	R	A	0.95	33.2	36.3	0	2		729.116	2184.33	2184.09	3	1.243	569	140	158	TRUE
CG6287 CG6287-PA [Drosophila melanogaster]	gi|19921140	35216.7	1	3	4	4	1.87e-05	0.148	TRUE	S_E8.3093.3093.3.dta	VVATPHLGASTSEAQVR	K	V	0.95	33.2	36.2	0	2		575.181	1722.52	1722.91	3	0.6136	356	281	297	TRUE
Myosin heavy chain CG17927-PF, isoform F [Drosophila melanogaster]	gi|24584700	224516	0.998	2	2	20	9.36e-05	0.548	FALSE	S_A11Dros.2910.2910.3.dta	NLNDEIAHQDELINK	R	L	0.95	33.2	36.5	0	2		589.291	1764.85	1765.87	3	-0.0139	-7.869	976	990	FALSE	gi|24584704,gi|28574239,gi|24584706,gi|24584710,gi|24584702,gi|24584712,gi|24584698
Myosin heavy chain CG17927-PF, isoform F [Drosophila melanogaster]	gi|24584700	224516	0.998	2	2	20	9.36e-05	0.548	FALSE	S_E912.7235.7235.3.dta	SKGSLEDQVVQTNPVLEAFGNAK	K	T	0.95	33.2	35.9	1.25	2		811.357	2431.05	2431.25	3	0.8093	332.8	211	233	FALSE	gi|24584704,gi|28574239,gi|24584706,gi|24584710,gi|24584702,gi|24584712,gi|24584698
Myosin heavy chain CG17927-PB, isoform B [Drosophila melanogaster]	gi|24584710	224397	0.998	2	2	9	4.21e-05	0.534	FALSE	S_A11Dros.2910.2910.3.dta	NLNDEIAHQDELINK	R	L	0.95	33.2	36.5	0	2		589.291	1764.85	1765.87	3	-0.0139	-7.869	976	990	FALSE	gi|24584704,gi|24584700,gi|28574239,gi|24584706,gi|24584702,gi|24584712,gi|24584698
Myosin heavy chain CG17927-PB, isoform B [Drosophila melanogaster]	gi|24584710	224397	0.998	2	2	9	4.21e-05	0.534	FALSE	S_E912.7235.7235.3.dta	SKGSLEDQVVQTNPVLEAFGNAK	K	T	0.95	33.2	35.9	1.25	2		811.357	2431.05	2431.25	3	0.8093	332.8	211	233	FALSE	gi|24584704,gi|24584700,gi|28574239,gi|24584706,gi|24584702,gi|24584712,gi|24584698
Myosin heavy chain CG17927-PJ, isoform J [Drosophila melanogaster]	gi|24584698	224394	0.998	2	2	3	1.4e-05	0.541	FALSE	S_A11Dros.2910.2910.3.dta	NLNDEIAHQDELINK	R	L	0.95	33.2	36.5	0	2		589.291	1764.85	1765.87	3	-0.0139	-7.869	974	988	FALSE	gi|24584704,gi|24584700,gi|28574239,gi|24584706,gi|24584710,gi|24584702,gi|24584712
Myosin heavy chain CG17927-PJ, isoform J [Drosophila melanogaster]	gi|24584698	224394	0.998	2	2	3	1.4e-05	0.541	FALSE	S_E912.7235.7235.3.dta	SKGSLEDQVVQTNPVLEAFGNAK	K	T	0.95	33.2	35.9	1.25	2		811.357	2431.05	2431.25	3	0.8093	332.8	211	233	FALSE	gi|24584704,gi|24584700,gi|28574239,gi|24584706,gi|24584710,gi|24584702,gi|24584712
Myosin heavy chain CG17927-PK, isoform K [Drosophila melanogaster]	gi|24584712	221394	0.993	1	1	1	4.68e-06	0.52	FALSE	S_A11Dros.2910.2910.3.dta	NLNDEIAHQDELINK	R	L	0.95	33.2	36.5	0	2		589.291	1764.85	1765.87	3	-0.0139	-7.869	976	990	FALSE	gi|24584704,gi|24584700,gi|28574239,gi|24584706,gi|24584710,gi|24584702,gi|24584698
Myosin heavy chain CG17927-PK, isoform K [Drosophila melanogaster]	gi|24584712	221394	0.993	1	1	1	4.68e-06	0.52	FALSE	S_E912.7235.7235.3.dta	SKGSLEDQVVQTNPVLEAFGNAK	K	T	0.95	33.2	35.9	1.25	2		811.357	2431.05	2431.25	3	0.8093	332.8	211	233	FALSE	gi|24584704,gi|24584700,gi|28574239,gi|24584706,gi|24584710,gi|24584702,gi|24584698
Myosin heavy chain CG17927-PD, isoform D [Drosophila melanogaster]	gi|24584702,gi|24584706	224480	0.994	1	1	38	0.000178	0.544	FALSE	S_A11Dros.2910.2910.3.dta	NLNDEIAHQDELINK	R	L	0.95	33.2	36.5	0	2		589.291	1764.85	1765.87	3	-0.0139	-7.869	976	990	FALSE	gi|24584704,gi|24584700,gi|28574239,gi|24584710,gi|24584712,gi|24584698
Myosin heavy chain CG17927-PD, isoform D [Drosophila melanogaster]	gi|24584702,gi|24584706	224480	0.994	1	1	38	0.000178	0.544	FALSE	S_E912.7235.7235.3.dta	SKGSLEDQVVQTNPVLEAFGNAK	K	T	0.95	33.2	35.9	1.25	2		811.357	2431.05	2431.25	3	0.8093	332.8	211	233	FALSE	gi|24584704,gi|24584700,gi|28574239,gi|24584710,gi|24584712,gi|24584698
Myosin heavy chain CG17927-PA, isoform A [Drosophila melanogaster]	gi|24584704,gi|28574239	224597	1	128	186	2330	0.0109	0.549	TRUE	A8.1137.1137.3.dta	QLQHTLNEVQSK	K	L	0.95	33.3	36.3	0	2		475.569	1423.68	1424.75	3	-0.05927	-41.6	1250	1261	TRUE	gi|24584700,gi|24584706,gi|24584710,gi|24584702,gi|24584712,gi|24584698
sallimus CG1915-PC, isoform C [Drosophila melanogaster]	gi|161080703	2.06604e+06	1	83	86	363	0.0017	0.0614	TRUE	S_F1.5352.5352.3.dta	NAIGEAVTTcAVNVTANK	K	T	0.95	33.3	36.5	1.54	2	c10: Carbamidomethyl (+57.02)	612.074	1833.2	1832.92	3	1.288	702.2	2036	2053	TRUE
bellwether CG3612-PA [Drosophila melanogaster]	gi|24658560	59405.3	1	27	35	476	0.00223	0.411	TRUE	S_A7Dros.1236.1236.3.dta	FNEAQDESKK	R	L	0.95	33.3	36.2	0	2		399.223	1194.65	1195.56	3	0.0951	79.53	231	240	TRUE
Cytochrome P450-4g1 CG3972-PA [Drosophila melanogaster]	gi|17933498	62954.7	1	24	31	601	0.00281	0.39	TRUE	S_A12Dros.1970.1970.2.dta	LDSIYK	R	F	0.95	33.3	35.5	0	2		369.738	737.46	738.404	2	0.06359	86.11	245	250	TRUE
beta Spectrin CG5870-PA [Drosophila melanogaster]	gi|17647191	265726	1	23	25	77	0.00036	0.138	TRUE	S_F912.6294.6294.3.dta	FLSDDPESYKPcDPEIIVSR	K	V	0.95	33.3	35.8	0	2	c12: Carbamidomethyl (+57.02)	789.878	2366.61	2367.12	3	0.5003	211.3	590	609	TRUE
Heat shock protein cognate 3 CG4147-PA, isoform A [Drosophila melanogaster]	gi|24641402,gi|24641404,gi|24641406,gi|24641408	72244.5	1	17	21	185	0.000866	0.314	TRUE	S_A9Dros.1273.1273.3.dta	VLEDADmNKK	K	D	0.95	33.3	36.6	0	2	m7: Oxidation (+15.99)	393.483	1177.43	1178.57	3	-0.1394	-118.3	345	354	TRUE
Glycoprotein 93 CG5520-PA [Drosophila melanogaster]	gi|21357739	90224	1	12	15	116	0.000543	0.196	TRUE	S_F910.4536.4536.3.dta	KPAEVTEDEYTSFYK	R	S	0.95	33.3	36.5	0	2		603.246	1806.71	1806.84	3	0.8777	485.5	346	360	TRUE
Vha68-2 CG3762-PA, isoform A [Drosophila melanogaster]	gi|24583984,gi|24583986,gi|24583988	68284.8	1	10	10	34	0.000159	0.205	TRUE	A9.4291.4291.3.dta	LLKDDFLQQNSYSSYDR	K	F	0.95	33.3	36.2	0	2		698.061	2091.16	2092	3	0.1677	80.17	511	527	TRUE
CG6643 CG6643-PA, isoform A [Drosophila melanogaster]	gi|24649705,gi|45552026	90849.8	1	6	6	10	4.68e-05	0.104	TRUE	S_F5.2812.2812.3.dta	FPDSTSSPGEHGLGR	R	M	0.95	33.3	36.6	0	2		515.444	1543.31	1543.71	3	0.6022	389.9	671	685	TRUE
Cytochrome c proximal CG17903-PA [Drosophila melanogaster]	gi|17137228	11717	1	5	6	23	0.000108	0.38	TRUE	S_E6.4220.4220.2.dta	mIFAGLK	K	K	0.95	33.3	35.5	0	2	m1: Oxidation (+15.99)	398.233	794.451	795.444	2	0.01446	18.18	85	91	TRUE
Alcohol dehydrogenase CG3481-PC, isoform C [Drosophila melanogaster]	gi|78706922,gi|78706924,gi|78706926,gi|78706928,gi|78706930	27716.8	1	5	8	24	0.000112	0.277	TRUE	S_F8.6025.6025.3.dta	LLAHPTQPSLAcAENFVK	K	A	0.95	33.3	36.3	1.82	2	c12: Carbamidomethyl (+57.02)	666.092	1995.25	1996.03	3	0.2277	114.1	208	225	TRUE
Peroxiredoxin 2540 CG11765-PA [Drosophila melanogaster]	gi|17975518,gi|24652434,gi|24652436	24738.5	1	3	3	10	4.68e-05	0.168	TRUE	S_E6.2960.2960.3.dta	IAVHQPEFAK	R	R	0.95	33.3	36.1	0	2		380.788	1139.34	1139.62	3	0.728	638.4	50	59	TRUE
Myosin heavy chain CG17927-PF, isoform F [Drosophila melanogaster]	gi|24584700	224516	0.998	2	2	20	9.36e-05	0.548	FALSE	A8.1137.1137.3.dta	QLQHTLNEVQSK	K	L	0.95	33.3	36.3	0	2		475.569	1423.68	1424.75	3	-0.05927	-41.6	1250	1261	FALSE	gi|24584704,gi|28574239,gi|24584706,gi|24584710,gi|24584702,gi|24584712,gi|24584698
Myosin heavy chain CG17927-PB, isoform B [Drosophila melanogaster]	gi|24584710	224397	0.998	2	2	9	4.21e-05	0.534	FALSE	A8.1137.1137.3.dta	QLQHTLNEVQSK	K	L	0.95	33.3	36.3	0	2		475.569	1423.68	1424.75	3	-0.05927	-41.6	1250	1261	FALSE	gi|24584704,gi|24584700,gi|28574239,gi|24584706,gi|24584702,gi|24584712,gi|24584698
Myosin heavy chain CG17927-PJ, isoform J [Drosophila melanogaster]	gi|24584698	224394	0.998	2	2	3	1.4e-05	0.541	FALSE	A8.1137.1137.3.dta	QLQHTLNEVQSK	K	L	0.95	33.3	36.3	0	2		475.569	1423.68	1424.75	3	-0.05927	-41.6	1248	1259	FALSE	gi|24584704,gi|24584700,gi|28574239,gi|24584706,gi|24584710,gi|24584702,gi|24584712
Myosin heavy chain CG17927-PK, isoform K [Drosophila melanogaster]	gi|24584712	221394	0.993	1	1	1	4.68e-06	0.52	FALSE	A8.1137.1137.3.dta	QLQHTLNEVQSK	K	L	0.95	33.3	36.3	0	2		475.569	1423.68	1424.75	3	-0.05927	-41.6	1250	1261	FALSE	gi|24584704,gi|24584700,gi|28574239,gi|24584706,gi|24584710,gi|24584702,gi|24584698
Myosin heavy chain CG17927-PD, isoform D [Drosophila melanogaster]	gi|24584702,gi|24584706	224480	0.994	1	1	38	0.000178	0.544	FALSE	A8.1137.1137.3.dta	QLQHTLNEVQSK	K	L	0.95	33.3	36.3	0	2		475.569	1423.68	1424.75	3	-0.05927	-41.6	1250	1261	FALSE	gi|24584704,gi|24584700,gi|28574239,gi|24584710,gi|24584712,gi|24584698
Na pump alpha subunit CG5670-PA, isoform A [Drosophila melanogaster]	gi|24648576,gi|24648578,gi|24648580,gi|45553435,gi|45553437,gi|45553439,gi|45553441	115591	1	24	29	209	0.000978	0.306	TRUE	S_E911.2729.2729.3.dta	YQVSIHETEDTNDPR	K	Y	0.95	33.4	36.6	0	2		601.933	1802.77	1803.82	3	-0.03249	-18.01	506	520	TRUE
Pyruvate kinase CG7070-PB, isoform B [Drosophila melanogaster]	gi|24648964,gi|28571814	55040.8	1	10	12	38	0.000178	0.232	TRUE	A9.3762.3762.3.dta	LGYEHPVAIALDTK	K	G	0.95	33.4	36.4	0	2		509.605	1525.79	1526.82	3	-0.02139	-14.01	84	97	TRUE
CG13091 CG13091-PA [Drosophila melanogaster]	gi|19920962	59459.3	1	8	8	37	0.000173	0.205	TRUE	S_E9.5296.5296.3.dta	LVTPISGDcSEPGLGLSDGDRR	K	M	0.95	33.4	36.2	0	2	c9: Carbamidomethyl (+57.02)	767.763	2300.26	2301.11	3	0.1573	68.37	78	99	TRUE
CG4666 CG4666-PA [Drosophila melanogaster]	gi|18858163	22938.6	1	3	3	11	5.15e-05	0.207	TRUE	S_F6.2387.2387.3.dta	TYPETAQRPEKPEELK	K	L	0.95	33.4	36.3	0	2		639.719	1916.13	1915.98	3	1.164	607	161	176	TRUE
Thioredoxin reductase-1 CG2151-PA, isoform A [Drosophila melanogaster]	gi|24640549,gi|24640551,gi|24640553	53205	0.998	2	3	6	2.81e-05	0.0672	TRUE	S_F910.5514.5514.3.dta	VAcLDFVKPTPTLGTK	R	W	0.95	33.4	36.5	0	2	c3: Carbamidomethyl (+57.02)	583.024	1746.05	1746.95	3	0.1088	62.29	35	50	TRUE
Myosin heavy chain CG17927-PA, isoform A [Drosophila melanogaster]	gi|24584704,gi|28574239	224597	1	128	186	2330	0.0109	0.549	TRUE	S_E912.4692.4692.3.dta	NLEHDLDNLR	R	E	0.95	33.5	36.1	0	2		413.481	1237.42	1238.61	3	-0.1865	-150.6	1334	1343	TRUE	gi|24584700,gi|24584706,gi|24584710,gi|24584702,gi|24584712,gi|24584698
Myosin heavy chain CG17927-PA, isoform A [Drosophila melanogaster]	gi|24584704,gi|28574239	224597	1	128	186	2330	0.0109	0.549	TRUE	S_E8.5331.5331.3.dta	QAEQELADAHEQLNEVSAQNASISAAK	R	R	0.95	33.5	35.6	2.28	2		951.667	2851.98	2852.37	3	0.6195	217.1	1700	1726	TRUE	gi|24584700,gi|24584706,gi|24584710,gi|24584702,gi|24584712,gi|24584698
bent CG32019-PA, isoform A [Drosophila melanogaster]	gi|28558739,gi|45552153	1.00129e+06	1	118	128	787	0.00368	0.191	TRUE	S_F911.2973.2973.3.dta	GGPSDPSDPSSTIIcKPR	R	F	0.95	33.5	36.4	0	2	c15: Carbamidomethyl (+57.02)	624.2	1869.58	1870.9	3	-0.3137	-167.7	5559	5576	TRUE
terribly reduced optic lobes CG33950-PF, isoform F [Drosophila melanogaster]	gi|78706474	513388	1	89	107	871	0.00408	0.237	TRUE	S_A11Dros.2270.2270.2.dta	LDPVVVR	R	S	0.95	33.5	35.3	0	2		399.108	796.2	797.489	2	-0.2811	-352.6	4250	4256	TRUE	gi|161077537
terribly reduced optic lobes CG33950-PF, isoform F [Drosophila melanogaster]	gi|78706474	513388	1	89	107	871	0.00408	0.237	TRUE	S_F1.3495.3495.3.dta	GSGRPVNGPDVIITGNR	R	F	0.95	33.5	36.6	2.64	2		570.382	1708.12	1708.91	3	0.2208	129.2	1953	1969	TRUE	gi|161077537
Fat body protein 1 CG17285-PA, isoform A [Drosophila melanogaster]	gi|24664081,gi|24664085	119646	1	22	30	257	0.0012	0.244	TRUE	A8.3987.3987.3.dta	FPQHLLLPR	R	G	0.95	33.5	36.8	0	2		374.248	1119.72	1120.66	3	0.0643	57.37	946	954	TRUE
aralar1 CG2139-PC, isoform C [Drosophila melanogaster]	gi|24651387,gi|24651389,gi|24651391,gi|45552009	76738	1	14	15	61	0.000285	0.226	TRUE	S_F911.6529.6529.2.dta	FGLYLPR	K	F	0.95	33.5	35.9	0	2		433.722	865.429	865.494	2	0.9428	1088	673	679	TRUE
knockdown CG3861-PB, isoform B [Drosophila melanogaster]	gi|24640124,gi|24640126	58199.5	1	12	15	71	0.000332	0.272	TRUE	S_E9.4054.4054.3.dta	ALGLPIERPK	R	S	0.95	33.5	36.2	0	2		365.319	1092.93	1093.67	3	0.2688	245.7	500	509	TRUE
Myosin light chain 2 CG2184-PA, isoform A [Drosophila melanogaster]	gi|17933672	23697.5	1	11	15	196	0.000917	0.518	TRUE	S_F8.6140.6140.3.dta	EAFQLMDADKDGIIGK	K	N	0.95	33.5	36.2	1.82	2		584.201	1749.58	1750.87	3	-0.2815	-160.8	82	97	TRUE
CG9297 CG9297-PA, isoform A [Drosophila melanogaster]	gi|28571703,gi|28571705	103748	1	10	11	40	0.000187	0.152	TRUE	S_E8.3078.3078.3.dta	DEDIDGDGVPNSKDEDIDGDGK	K	A	0.95	33.5	36	0	2		768.94	2303.8	2304.96	3	-0.1545	-67.04	144	165	TRUE
Sphingosine-1-phosphate lyase CG8946-PA, isoform A [Drosophila melanogaster]	gi|21355963,gi|24654344	60287.9	1	3	4	5	2.34e-05	0.0734	TRUE	S_E910.3668.3668.3.dta	GITRPNIVVPK	K	T	0.95	33.5	36.2	0	2		398.97	1193.89	1193.74	3	1.158	969.3	218	228	TRUE
Myosin heavy chain CG17927-PF, isoform F [Drosophila melanogaster]	gi|24584700	224516	0.998	2	2	20	9.36e-05	0.548	FALSE	S_E912.4692.4692.3.dta	NLEHDLDNLR	R	E	0.95	33.5	36.1	0	2		413.481	1237.42	1238.61	3	-0.1865	-150.6	1334	1343	FALSE	gi|24584704,gi|28574239,gi|24584706,gi|24584710,gi|24584702,gi|24584712,gi|24584698
Myosin heavy chain CG17927-PF, isoform F [Drosophila melanogaster]	gi|24584700	224516	0.998	2	2	20	9.36e-05	0.548	FALSE	S_E8.5331.5331.3.dta	QAEQELADAHEQLNEVSAQNASISAAK	R	R	0.95	33.5	35.6	2.28	2		951.667	2851.98	2852.37	3	0.6195	217.1	1700	1726	FALSE	gi|24584704,gi|28574239,gi|24584706,gi|24584710,gi|24584702,gi|24584712,gi|24584698
Myosin heavy chain CG17927-PB, isoform B [Drosophila melanogaster]	gi|24584710	224397	0.998	2	2	9	4.21e-05	0.534	FALSE	S_E912.4692.4692.3.dta	NLEHDLDNLR	R	E	0.95	33.5	36.1	0	2		413.481	1237.42	1238.61	3	-0.1865	-150.6	1334	1343	FALSE	gi|24584704,gi|24584700,gi|28574239,gi|24584706,gi|24584702,gi|24584712,gi|24584698
Myosin heavy chain CG17927-PB, isoform B [Drosophila melanogaster]	gi|24584710	224397	0.998	2	2	9	4.21e-05	0.534	FALSE	S_E8.5331.5331.3.dta	QAEQELADAHEQLNEVSAQNASISAAK	R	R	0.95	33.5	35.6	2.28	2		951.667	2851.98	2852.37	3	0.6195	217.1	1700	1726	FALSE	gi|24584704,gi|24584700,gi|28574239,gi|24584706,gi|24584702,gi|24584712,gi|24584698
Myosin heavy chain CG17927-PJ, isoform J [Drosophila melanogaster]	gi|24584698	224394	0.998	2	2	3	1.4e-05	0.541	FALSE	S_E912.4692.4692.3.dta	NLEHDLDNLR	R	E	0.95	33.5	36.1	0	2		413.481	1237.42	1238.61	3	-0.1865	-150.6	1332	1341	FALSE	gi|24584704,gi|24584700,gi|28574239,gi|24584706,gi|24584710,gi|24584702,gi|24584712
Myosin heavy chain CG17927-PJ, isoform J [Drosophila melanogaster]	gi|24584698	224394	0.998	2	2	3	1.4e-05	0.541	FALSE	S_E8.5331.5331.3.dta	QAEQELADAHEQLNEVSAQNASISAAK	R	R	0.95	33.5	35.6	2.28	2		951.667	2851.98	2852.37	3	0.6195	217.1	1698	1724	FALSE	gi|24584704,gi|24584700,gi|28574239,gi|24584706,gi|24584710,gi|24584702,gi|24584712
terribly reduced optic lobes CG33950-PG, isoform G [Drosophila melanogaster]	gi|161077537	459070	0.5	1	1	4	1.87e-05	0.256	FALSE	S_A11Dros.2270.2270.2.dta	LDPVVVR	R	S	0.95	33.5	35.3	0	2		399.108	796.2	797.489	2	-0.2811	-352.6	3777	3783	FALSE	gi|78706474
terribly reduced optic lobes CG33950-PG, isoform G [Drosophila melanogaster]	gi|161077537	459070	0.5	1	1	4	1.87e-05	0.256	FALSE	S_F1.3495.3495.3.dta	GSGRPVNGPDVIITGNR	R	F	0.95	33.5	36.6	2.64	2		570.382	1708.12	1708.91	3	0.2208	129.2	1480	1496	FALSE	gi|78706474
Myosin heavy chain CG17927-PK, isoform K [Drosophila melanogaster]	gi|24584712	221394	0.993	1	1	1	4.68e-06	0.52	FALSE	S_E912.4692.4692.3.dta	NLEHDLDNLR	R	E	0.95	33.5	36.1	0	2		413.481	1237.42	1238.61	3	-0.1865	-150.6	1334	1343	FALSE	gi|24584704,gi|24584700,gi|28574239,gi|24584706,gi|24584710,gi|24584702,gi|24584698
Myosin heavy chain CG17927-PK, isoform K [Drosophila melanogaster]	gi|24584712	221394	0.993	1	1	1	4.68e-06	0.52	FALSE	S_E8.5331.5331.3.dta	QAEQELADAHEQLNEVSAQNASISAAK	R	R	0.95	33.5	35.6	2.28	2		951.667	2851.98	2852.37	3	0.6195	217.1	1700	1726	FALSE	gi|24584704,gi|24584700,gi|28574239,gi|24584706,gi|24584710,gi|24584702,gi|24584698
Myosin heavy chain CG17927-PD, isoform D [Drosophila melanogaster]	gi|24584702,gi|24584706	224480	0.994	1	1	38	0.000178	0.544	FALSE	S_E912.4692.4692.3.dta	NLEHDLDNLR	R	E	0.95	33.5	36.1	0	2		413.481	1237.42	1238.61	3	-0.1865	-150.6	1334	1343	FALSE	gi|24584704,gi|24584700,gi|28574239,gi|24584710,gi|24584712,gi|24584698
Myosin heavy chain CG17927-PD, isoform D [Drosophila melanogaster]	gi|24584702,gi|24584706	224480	0.994	1	1	38	0.000178	0.544	FALSE	S_E8.5331.5331.3.dta	QAEQELADAHEQLNEVSAQNASISAAK	R	R	0.95	33.5	35.6	2.28	2		951.667	2851.98	2852.37	3	0.6195	217.1	1700	1726	FALSE	gi|24584704,gi|24584700,gi|28574239,gi|24584710,gi|24584712,gi|24584698
Myosin heavy chain CG17927-PA, isoform A [Drosophila melanogaster]	gi|24584704,gi|28574239	224597	1	128	186	2330	0.0109	0.549	TRUE	S_E7.3959.3959.3.dta	ISLTTQLEDTKR	K	L	0.95	33.6	36.8	0	2		469.08	1404.22	1404.77	3	0.4535	322.7	1305	1316	TRUE	gi|24584700,gi|24584706,gi|24584710,gi|24584702,gi|24584712,gi|24584698
CG6206 CG6206-PA, isoform A [Drosophila melanogaster]	gi|19921088	122670	1	16	18	68	0.000318	0.181	TRUE	S_A8Dros.2284.2284.3.dta	SSGAYIFRPNENK	R	I	0.95	33.6	36.7	0	2		495.291	1482.85	1482.73	3	1.122	756.5	652	664	TRUE
Succinyl coenzyme A synthetase flavoprotein subunit CG17246-PA, isoform A [Drosophila melanogaster]	gi|17137288,gi|24655642,gi|24655647	72325.6	1	11	14	78	0.000365	0.25	TRUE	S_E8.3693.3693.3.dta	TIAELNKPGAPAPTLK	K	E	0.95	33.6	36.4	0	2		541.378	1621.11	1620.93	3	1.186	731	468	483	TRUE
Oligomycin sensitivity-conferring protein CG4307-PA, isoform A [Drosophila melanogaster]	gi|24647054	22405.2	1	10	13	64	0.000299	0.455	TRUE	S_E6.3598.3598.3.dta	KLDTVINAYK	K	T	0.95	33.6	36.8	0	2		388.74	1163.2	1164.66	3	-0.4594	-394.6	116	125	TRUE
Myosin heavy chain CG17927-PF, isoform F [Drosophila melanogaster]	gi|24584700	224516	0.998	2	2	20	9.36e-05	0.548	FALSE	S_E7.3959.3959.3.dta	ISLTTQLEDTKR	K	L	0.95	33.6	36.8	0	2		469.08	1404.22	1404.77	3	0.4535	322.7	1305	1316	FALSE	gi|24584704,gi|28574239,gi|24584706,gi|24584710,gi|24584702,gi|24584712,gi|24584698
Ribosomal protein S29 CG8495-PA, isoform A [Drosophila melanogaster]	gi|24645515,gi|24645517	6572.9	0.998	2	3	5	2.34e-05	0.286	TRUE	S_E3.3899.3899.2.dta	YGLNIcR	K	Q	0.95	33.6	35.9	0	2	c6: Carbamidomethyl (+57.02)	448.242	894.469	895.446	2	0.03042	33.97	34	40	TRUE
sar1 CG7073-PB, isoform B [Drosophila melanogaster]	gi|21355813,gi|24648946,gi|24648948,gi|24648950,gi|45553457	17470.7	0.998	2	3	4	1.87e-05	0.129	TRUE	S_E6.6826.6826.1.dta	WLAQYID	R	-	0.95	33.6	36.4	0	2		908.279	907.272	908.452	1	-0.1723	-189.7	149	155	TRUE
Myosin heavy chain CG17927-PB, isoform B [Drosophila melanogaster]	gi|24584710	224397	0.998	2	2	9	4.21e-05	0.534	FALSE	S_E7.3959.3959.3.dta	ISLTTQLEDTKR	K	L	0.95	33.6	36.8	0	2		469.08	1404.22	1404.77	3	0.4535	322.7	1305	1316	FALSE	gi|24584704,gi|24584700,gi|28574239,gi|24584706,gi|24584702,gi|24584712,gi|24584698
Imaginal disc growth factor 2 CG4475-PA [Drosophila melanogaster]	gi|19549546	49142.7	1	2	2	5	2.34e-05	0.0818	TRUE	S_F910.3544.3544.3.dta	NPEEADYSAPIYHPDGSK	R	D	0.95	33.6	36.3	1.96	2		663.851	1988.53	1989.88	3	-0.3457	-173.8	250	267	TRUE
Paramyosin CG5939-PC, isoform C [Drosophila melanogaster]	gi|24661120,gi|24661124	74260.8	0.998	2	3	11	5.15e-05	0.375	TRUE	S_E910.7095.7095.3.dta	SASAIAQALLSESEK	K	N	0.95	33.6	36.5	0	2		502.618	1504.83	1504.79	3	1.054	699.8	176	190	TRUE
Myosin heavy chain CG17927-PJ, isoform J [Drosophila melanogaster]	gi|24584698	224394	0.998	2	2	3	1.4e-05	0.541	FALSE	S_E7.3959.3959.3.dta	ISLTTQLEDTKR	K	L	0.95	33.6	36.8	0	2		469.08	1404.22	1404.77	3	0.4535	322.7	1303	1314	FALSE	gi|24584704,gi|24584700,gi|28574239,gi|24584706,gi|24584710,gi|24584702,gi|24584712
CG41128 CG41128-PA [Drosophila melanogaster]	gi|161076204	9400.5	0.998	2	2	4	1.87e-05	0.212	TRUE	S_F4.4307.4307.3.dta	LDHcVSDVLIK	R	G	0.95	33.6	36.5	0	2	c4: Carbamidomethyl (+57.02)	433.551	1297.63	1298.68	3	-0.04055	-31.23	29	39	TRUE
Myosin heavy chain CG17927-PK, isoform K [Drosophila melanogaster]	gi|24584712	221394	0.993	1	1	1	4.68e-06	0.52	FALSE	S_E7.3959.3959.3.dta	ISLTTQLEDTKR	K	L	0.95	33.6	36.8	0	2		469.08	1404.22	1404.77	3	0.4535	322.7	1305	1316	FALSE	gi|24584704,gi|24584700,gi|28574239,gi|24584706,gi|24584710,gi|24584702,gi|24584698
Myosin heavy chain CG17927-PD, isoform D [Drosophila melanogaster]	gi|24584702,gi|24584706	224480	0.994	1	1	38	0.000178	0.544	FALSE	S_E7.3959.3959.3.dta	ISLTTQLEDTKR	K	L	0.95	33.6	36.8	0	2		469.08	1404.22	1404.77	3	0.4535	322.7	1305	1316	FALSE	gi|24584704,gi|24584700,gi|28574239,gi|24584710,gi|24584712,gi|24584698
Myosin heavy chain CG17927-PA, isoform A [Drosophila melanogaster]	gi|24584704,gi|28574239	224597	1	128	186	2330	0.0109	0.549	TRUE	S_F911.4755.4755.3.dta	NLEHDLDNLR	R	E	0.95	33.7	36.1	0	2		413.528	1237.56	1238.61	3	-0.0455	-36.74	1334	1343	TRUE	gi|24584700,gi|24584706,gi|24584710,gi|24584702,gi|24584712,gi|24584698
Myosin heavy chain CG17927-PA, isoform A [Drosophila melanogaster]	gi|24584704,gi|28574239	224597	1	128	186	2330	0.0109	0.549	TRUE	S_F910.4693.4693.3.dta	NLEHDLDNLR	R	E	0.95	33.7	36.1	0	2		413.865	1238.57	1238.61	3	0.9664	779.6	1334	1343	TRUE	gi|24584700,gi|24584706,gi|24584710,gi|24584702,gi|24584712,gi|24584698
Myosin heavy chain CG17927-PA, isoform A [Drosophila melanogaster]	gi|24584704,gi|28574239	224597	1	128	186	2330	0.0109	0.549	TRUE	S_E912.3405.3405.3.dta	AGVLGQmEEFRDER	R	L	0.95	33.7	36.3	0	2	m7: Oxidation (+15.99)	551.704	1652.09	1652.77	3	0.3252	196.7	766	779	TRUE	gi|24584700,gi|24584706,gi|24584710,gi|24584702,gi|24584712,gi|24584698
bent CG32019-PA, isoform A [Drosophila melanogaster]	gi|28558739,gi|45552153	1.00129e+06	1	118	128	787	0.00368	0.191	TRUE	S_G1.5136.5136.3.dta	SDGPEYNVDGLVPGHDYK	R	F	0.95	33.7	36.2	0	2		655.068	1962.18	1961.89	3	1.301	662.7	4547	4564	TRUE
Papilin CG33103-PA, isoform A [Drosophila melanogaster]	gi|28572036	312636	1	51	58	438	0.00205	0.228	TRUE	B1.3164.3164.2.dta	NGQMFGLK	R	N	0.95	33.7	35.9	0	2		448.241	894.467	894.451	2	1.024	1143	2655	2662	TRUE
zormin CG33484-PD, isoform D [Drosophila melanogaster]	gi|116007762	411353	1	35	37	226	0.00106	0.131	TRUE	S_G3.3849.3849.2.dta	IPLITEK	K	I	0.95	33.7	36.1	0	2		407.306	812.597	813.509	2	0.09568	117.6	2565	2571	TRUE
Clathrin heavy chain CG9012-PE, isoform E [Drosophila melanogaster]	gi|161077848,gi|161077850,gi|17137000,gi|24642310,gi|45555323,gi|45555333	191165	1	27	27	138	0.000646	0.196	TRUE	S_F1.3750.3750.2.dta	EAIDSYIK	K	A	0.95	33.7	35.6	0	2		469.583	937.15	938.484	2	-0.3261	-347.6	1124	1131	TRUE
bellwether CG3612-PA [Drosophila melanogaster]	gi|24658560	59405.3	1	27	35	476	0.00223	0.411	TRUE	S_A7Dros.2180.2180.2.dta	APGIIPR	K	V	0.95	33.7	35.4	0	2		362.259	722.503	723.452	2	0.05857	80.95	175	181	TRUE
Larval serum protein 1 gamma CG6821-PA [Drosophila melanogaster]	gi|17647601	93395.1	1	24	29	120	0.000561	0.31	TRUE	S_F912.5703.5703.1.dta	FDYEVFSK	K	L	0.95	33.7	37	0	2		1034.28	1033.27	1034.48	1	-0.2069	-200.1	179	186	TRUE
Fat body protein 1 CG17285-PA, isoform A [Drosophila melanogaster]	gi|24664081,gi|24664085	119646	1	22	30	257	0.0012	0.244	TRUE	S_F910.5150.5150.3.dta	FPQHLLLPR	R	G	0.95	33.7	36.8	0	2		374.239	1119.69	1120.66	3	0.0394	35.15	946	954	TRUE
CG11198 CG11198-PC, isoform C [Drosophila melanogaster]	gi|161076407,gi|161076409,gi|24586458,gi|24586460	261907	1	20	20	52	0.000243	0.116	TRUE	S_F911.5738.5738.3.dta	ITSENPDEGFKPSSGTVQELNFR	R	S	0.95	33.7	36.1	1.44	2		851.306	2550.89	2552.23	3	-0.3246	-127.2	488	510	TRUE
Neural conserved at 73EF CG11661-PI, isoform I [Drosophila melanogaster]	gi|161084461	122879	1	19	20	218	0.00102	0.219	TRUE	S_F912.5645.5645.3.dta	LAVVANPSHLEAVDPVVQGK	R	T	0.95	33.7	36.3	3.23	2		681.811	2042.41	2043.12	3	0.2947	144.2	362	381	TRUE
CG4169 CG4169-PA [Drosophila melanogaster]	gi|24665395	45397.7	1	18	22	151	0.000706	0.577	TRUE	S_F910.1415.1415.3.dta	AVVAVAGQGAAASNHK	R	E	0.95	33.7	36.4	1.54	2		484.21	1449.61	1450.78	3	-0.1621	-111.7	256	271	TRUE
Actin 87E CG18290-PA, isoform A [Drosophila melanogaster]	gi|17137090,gi|24646579	41784.9	1	15	24	417	0.00195	0.423	TRUE	S_E911.6411.6411.1.dta	DLTDYLMK	R	I	0.95	33.7	36.6	0	2		999.42	998.413	998.487	1	0.9335	934	185	192	TRUE	gi|17647135,gi|62473515,gi|62473526,gi|24639997,gi|17975540,gi|17530805
pericardin CG5700-PB [Drosophila melanogaster]	gi|24663043	163475	1	14	18	215	0.00101	0.114	TRUE	S_F7.2966.2966.3.dta	ASSQSGGIIQQSQSEVHANDK	K	G	0.95	33.7	36.2	1.49	2		724.771	2171.29	2171.03	3	1.265	582.3	1336	1356	TRUE
CG7834 CG7834-PA, isoform A [Drosophila melanogaster]	gi|24651145,gi|24651147	27199.7	1	8	9	46	0.000215	0.356	TRUE	S_F8.4001.4001.2.dta	YATLPNImK	R	A	0.95	33.7	36.1	0	2	m8: Oxidation (+15.99)	533.663	1065.31	1066.56	2	-0.2421	-227.1	190	198	TRUE
CG3074 CG3074-PA, isoform A [Drosophila melanogaster]	gi|24657813,gi|24657819	48768.3	1	8	13	44	0.000206	0.213	TRUE	S_A8Dros.3173.3173.3.dta	GKENVQLSAQNILScTR	K	R	0.95	33.7	36.4	0	2	c15: Carbamidomethyl (+57.02)	640.398	1918.17	1917.98	3	1.196	623.1	232	248	TRUE
Ribosomal protein L5 CG17489-PA, isoform A [Drosophila melanogaster]	gi|116007382,gi|116007384,gi|116007388	34019.5	1	7	11	33	0.000154	0.224	TRUE	S_F9.3881.3881.3.dta	GAVDGGLNIPHSVK	K	R	0.95	33.7	36.4	1.4	2		455.691	1364.05	1363.73	3	1.324	969.9	165	178	TRUE
Ferritin 1 heavy chain homologue CG2216-PA, isoform A [Drosophila melanogaster]	gi|17933722,gi|24651356,gi|24651358,gi|24651360	23128.3	1	4	5	31	0.000145	0.249	TRUE	S_F6.3773.3773.2.dta	LVEYLSmR	K	G	0.95	33.7	36	0	2	m7: Oxidation (+15.99)	513.786	1025.56	1026.53	2	0.03427	33.39	94	101	TRUE
CG5174 CG5174-PJ, isoform J [Drosophila melanogaster]	gi|24655017,gi|24655026,gi|24655036	20484.7	1	4	4	15	7.02e-05	0.237	TRUE	S_F5.4135.4135.2.dta	TVYEAPLYQR	K	T	0.95	33.7	36.1	0	2		620.197	1238.38	1239.64	2	-0.2517	-203.1	113	122	TRUE
Ribosomal protein L23A CG7977-PA [Drosophila melanogaster]	gi|24655502	29447	1	3	3	44	0.000206	0.101	TRUE	S_F7.4594.4594.2.dta	MDAYNIIK	R	Y	0.95	33.7	35.8	0	2		484.332	966.649	967.492	2	0.1641	169.6	192	199	TRUE
Myosin heavy chain CG17927-PF, isoform F [Drosophila melanogaster]	gi|24584700	224516	0.998	2	2	20	9.36e-05	0.548	FALSE	S_F911.4755.4755.3.dta	NLEHDLDNLR	R	E	0.95	33.7	36.1	0	2		413.528	1237.56	1238.61	3	-0.0455	-36.74	1334	1343	FALSE	gi|24584704,gi|28574239,gi|24584706,gi|24584710,gi|24584702,gi|24584712,gi|24584698
Myosin heavy chain CG17927-PF, isoform F [Drosophila melanogaster]	gi|24584700	224516	0.998	2	2	20	9.36e-05	0.548	FALSE	S_F910.4693.4693.3.dta	NLEHDLDNLR	R	E	0.95	33.7	36.1	0	2		413.865	1238.57	1238.61	3	0.9664	779.6	1334	1343	FALSE	gi|24584704,gi|28574239,gi|24584706,gi|24584710,gi|24584702,gi|24584712,gi|24584698
Myosin heavy chain CG17927-PF, isoform F [Drosophila melanogaster]	gi|24584700	224516	0.998	2	2	20	9.36e-05	0.548	FALSE	S_E912.3405.3405.3.dta	AGVLGQmEEFRDER	R	L	0.95	33.7	36.3	0	2	m7: Oxidation (+15.99)	551.704	1652.09	1652.77	3	0.3252	196.7	766	779	FALSE	gi|24584704,gi|28574239,gi|24584706,gi|24584710,gi|24584702,gi|24584712,gi|24584698
Myosin heavy chain CG17927-PB, isoform B [Drosophila melanogaster]	gi|24584710	224397	0.998	2	2	9	4.21e-05	0.534	FALSE	S_F911.4755.4755.3.dta	NLEHDLDNLR	R	E	0.95	33.7	36.1	0	2		413.528	1237.56	1238.61	3	-0.0455	-36.74	1334	1343	FALSE	gi|24584704,gi|24584700,gi|28574239,gi|24584706,gi|24584702,gi|24584712,gi|24584698
Myosin heavy chain CG17927-PB, isoform B [Drosophila melanogaster]	gi|24584710	224397	0.998	2	2	9	4.21e-05	0.534	FALSE	S_F910.4693.4693.3.dta	NLEHDLDNLR	R	E	0.95	33.7	36.1	0	2		413.865	1238.57	1238.61	3	0.9664	779.6	1334	1343	FALSE	gi|24584704,gi|24584700,gi|28574239,gi|24584706,gi|24584702,gi|24584712,gi|24584698
Myosin heavy chain CG17927-PB, isoform B [Drosophila melanogaster]	gi|24584710	224397	0.998	2	2	9	4.21e-05	0.534	FALSE	S_E912.3405.3405.3.dta	AGVLGQmEEFRDER	R	L	0.95	33.7	36.3	0	2	m7: Oxidation (+15.99)	551.704	1652.09	1652.77	3	0.3252	196.7	766	779	FALSE	gi|24584704,gi|24584700,gi|28574239,gi|24584706,gi|24584702,gi|24584712,gi|24584698
Actin 79B CG7478-PA [Drosophila melanogaster]	gi|17975540	41769.7	0.998	2	2	4	1.87e-05	0.388	FALSE	S_E911.6411.6411.1.dta	DLTDYLMK	R	I	0.95	33.7	36.6	0	2		999.42	998.413	998.487	1	0.9335	934	185	192	FALSE	gi|17647135,gi|62473515,gi|62473526,gi|24639997,gi|17530805,gi|17137090,gi|24646579
Myosin heavy chain CG17927-PJ, isoform J [Drosophila melanogaster]	gi|24584698	224394	0.998	2	2	3	1.4e-05	0.541	FALSE	S_F911.4755.4755.3.dta	NLEHDLDNLR	R	E	0.95	33.7	36.1	0	2		413.528	1237.56	1238.61	3	-0.0455	-36.74	1332	1341	FALSE	gi|24584704,gi|24584700,gi|28574239,gi|24584706,gi|24584710,gi|24584702,gi|24584712
Myosin heavy chain CG17927-PJ, isoform J [Drosophila melanogaster]	gi|24584698	224394	0.998	2	2	3	1.4e-05	0.541	FALSE	S_F910.4693.4693.3.dta	NLEHDLDNLR	R	E	0.95	33.7	36.1	0	2		413.865	1238.57	1238.61	3	0.9664	779.6	1332	1341	FALSE	gi|24584704,gi|24584700,gi|28574239,gi|24584706,gi|24584710,gi|24584702,gi|24584712
Myosin heavy chain CG17927-PJ, isoform J [Drosophila melanogaster]	gi|24584698	224394	0.998	2	2	3	1.4e-05	0.541	FALSE	S_E912.3405.3405.3.dta	AGVLGQmEEFRDER	R	L	0.95	33.7	36.3	0	2	m7: Oxidation (+15.99)	551.704	1652.09	1652.77	3	0.3252	196.7	764	777	FALSE	gi|24584704,gi|24584700,gi|28574239,gi|24584706,gi|24584710,gi|24584702,gi|24584712
Actin 5C CG4027-PB, isoform B [Drosophila melanogaster]	gi|17530805,gi|24639997,gi|62473515,gi|62473526	41804.7	0.998	2	3	13	6.08e-05	0.364	FALSE	S_E911.6411.6411.1.dta	DLTDYLMK	R	I	0.95	33.7	36.6	0	2		999.42	998.413	998.487	1	0.9335	934	185	192	FALSE	gi|17647135,gi|17975540,gi|17137090,gi|24646579
Actin 57B CG10067-PA, isoform A [Drosophila melanogaster]	gi|17647135	41817.9	0.5	1	2	54	0.000253	0.423	FALSE	S_E911.6411.6411.1.dta	DLTDYLMK	R	I	0.95	33.7	36.6	0	2		999.42	998.413	998.487	1	0.9335	934	185	192	FALSE	gi|62473515,gi|62473526,gi|24639997,gi|17975540,gi|17530805,gi|17137090,gi|24646579
Myosin heavy chain CG17927-PK, isoform K [Drosophila melanogaster]	gi|24584712	221394	0.993	1	1	1	4.68e-06	0.52	FALSE	S_F911.4755.4755.3.dta	NLEHDLDNLR	R	E	0.95	33.7	36.1	0	2		413.528	1237.56	1238.61	3	-0.0455	-36.74	1334	1343	FALSE	gi|24584704,gi|24584700,gi|28574239,gi|24584706,gi|24584710,gi|24584702,gi|24584698
Myosin heavy chain CG17927-PK, isoform K [Drosophila melanogaster]	gi|24584712	221394	0.993	1	1	1	4.68e-06	0.52	FALSE	S_F910.4693.4693.3.dta	NLEHDLDNLR	R	E	0.95	33.7	36.1	0	2		413.865	1238.57	1238.61	3	0.9664	779.6	1334	1343	FALSE	gi|24584704,gi|24584700,gi|28574239,gi|24584706,gi|24584710,gi|24584702,gi|24584698
Myosin heavy chain CG17927-PK, isoform K [Drosophila melanogaster]	gi|24584712	221394	0.993	1	1	1	4.68e-06	0.52	FALSE	S_E912.3405.3405.3.dta	AGVLGQmEEFRDER	R	L	0.95	33.7	36.3	0	2	m7: Oxidation (+15.99)	551.704	1652.09	1652.77	3	0.3252	196.7	766	779	FALSE	gi|24584704,gi|24584700,gi|28574239,gi|24584706,gi|24584710,gi|24584702,gi|24584698
Myosin heavy chain CG17927-PD, isoform D [Drosophila melanogaster]	gi|24584702,gi|24584706	224480	0.994	1	1	38	0.000178	0.544	FALSE	S_F911.4755.4755.3.dta	NLEHDLDNLR	R	E	0.95	33.7	36.1	0	2		413.528	1237.56	1238.61	3	-0.0455	-36.74	1334	1343	FALSE	gi|24584704,gi|24584700,gi|28574239,gi|24584710,gi|24584712,gi|24584698
Myosin heavy chain CG17927-PD, isoform D [Drosophila melanogaster]	gi|24584702,gi|24584706	224480	0.994	1	1	38	0.000178	0.544	FALSE	S_F910.4693.4693.3.dta	NLEHDLDNLR	R	E	0.95	33.7	36.1	0	2		413.865	1238.57	1238.61	3	0.9664	779.6	1334	1343	FALSE	gi|24584704,gi|24584700,gi|28574239,gi|24584710,gi|24584712,gi|24584698
Myosin heavy chain CG17927-PD, isoform D [Drosophila melanogaster]	gi|24584702,gi|24584706	224480	0.994	1	1	38	0.000178	0.544	FALSE	S_E912.3405.3405.3.dta	AGVLGQmEEFRDER	R	L	0.95	33.7	36.3	0	2	m7: Oxidation (+15.99)	551.704	1652.09	1652.77	3	0.3252	196.7	766	779	FALSE	gi|24584704,gi|24584700,gi|28574239,gi|24584710,gi|24584712,gi|24584698
Myosin heavy chain CG17927-PA, isoform A [Drosophila melanogaster]	gi|24584704,gi|28574239	224597	1	128	186	2330	0.0109	0.549	TRUE	S_A12Dros.1345.1345.3.dta	SEELEEAKR	R	K	0.95	33.8	37.2	0	2		364.182	1089.52	1090.54	3	-0.006412	-5.88	1382	1390	TRUE	gi|24584700,gi|24584706,gi|24584710,gi|24584702,gi|24584712,gi|24584698
Myosin heavy chain CG17927-PA, isoform A [Drosophila melanogaster]	gi|24584704,gi|28574239	224597	1	128	186	2330	0.0109	0.549	TRUE	S_A11Dros.1345.1345.3.dta	SEELEEAKR	R	K	0.95	33.8	36.8	0	2		364.603	1090.79	1090.54	3	1.255	1150	1382	1390	TRUE	gi|24584700,gi|24584706,gi|24584710,gi|24584702,gi|24584712,gi|24584698
Myosin heavy chain CG17927-PA, isoform A [Drosophila melanogaster]	gi|24584704,gi|28574239	224597	1	128	186	2330	0.0109	0.549	TRUE	S_F2.4647.4647.2.dta	DLLQQVNPPK	K	Y	0.95	33.8	36.2	0	2		576.227	1150.44	1151.64	2	-0.196	-170.2	75	84	TRUE	gi|24584700,gi|24584706,gi|24584710,gi|24584702,gi|24584712
bent CG32019-PA, isoform A [Drosophila melanogaster]	gi|28558739,gi|45552153	1.00129e+06	1	118	128	787	0.00368	0.191	TRUE	S_A11Dros.2092.2092.2.dta	LSEYSSLR	R	K	0.95	33.8	35.8	0	2		478.246	954.476	954.49	2	0.9939	1040	8294	8301	TRUE
sallimus CG1915-PC, isoform C [Drosophila melanogaster]	gi|161080703	2.06604e+06	1	83	86	363	0.0017	0.0614	TRUE	S_F1.3107.3107.2.dta	IEPVTDPNLK	K	V	0.95	33.8	35.8	0	2		563.182	1124.35	1125.62	2	-0.2593	-230.4	1448	1457	TRUE
sallimus CG1915-PC, isoform C [Drosophila melanogaster]	gi|161080703	2.06604e+06	1	83	86	363	0.0017	0.0614	TRUE	A9.1331.1331.3.dta	SSIIHETQHEEALTK	R	I	0.95	33.8	36.3	0	2		574.974	1721.9	1722.87	3	0.04101	23.8	1920	1934	TRUE
Papilin CG33103-PA, isoform A [Drosophila melanogaster]	gi|28572036	312636	1	51	58	438	0.00205	0.228	TRUE	S_E911.3603.3603.3.dta	SGEcHEFEFTGcR	R	G	0.95	33.8	36.8	0	2	c4: Carbamidomethyl (+57.02), c12: Carbamidomethyl (+57.02)	539.413	1615.21	1615.63	3	0.5956	368.5	2150	2162	TRUE
Laminin A CG10236-PA [Drosophila melanogaster]	gi|17136292	411103	1	44	48	274	0.00128	0.16	TRUE	S_G1.5445.5445.3.dta	IFDHFDVGTEMK	K	I	0.95	33.8	36.3	1.41	2		480.342	1438	1438.67	3	0.3417	237.5	3547	3558	TRUE
Laminin A CG10236-PA [Drosophila melanogaster]	gi|17136292	411103	1	44	48	274	0.00128	0.16	TRUE	S_E912.6937.6937.3.dta	ADKDTSNGLLFFYGR	K	D	0.95	33.8	36.6	0	2		568.775	1703.3	1703.84	3	0.4691	275.2	2907	2921	TRUE
Laminin A CG10236-PA [Drosophila melanogaster]	gi|17136292	411103	1	44	48	274	0.00128	0.16	TRUE	S_G2.7052.7052.2.dta	LPEQPNFDVDFTEAGYR	K	F	0.95	33.8	36.1	0	2		1000.02	1998.02	1997.92	2	1.105	552.6	3335	3351	TRUE
CG1516 CG1516-PE, isoform E [Drosophila melanogaster]	gi|19921944,gi|24652210,gi|24652212,gi|24652214,gi|24652216,gi|24652218,gi|24652220,gi|24652222,gi|24652224	130848	1	36	39	469	0.00219	0.346	TRUE	S_F1.4153.4153.2.dta	LPIEIR	R	D	0.95	33.8	34.6	0	2		370.744	739.472	740.467	2	0.01227	16.57	285	290	TRUE
CG1516 CG1516-PE, isoform E [Drosophila melanogaster]	gi|19921944,gi|24652210,gi|24652212,gi|24652214,gi|24652216,gi|24652218,gi|24652220,gi|24652222,gi|24652224	130848	1	36	39	469	0.00219	0.346	TRUE	A11.2538.2538.2.dta	EEALEFcK	K	K	0.95	33.8	35.8	0	2	c7: Carbamidomethyl (+57.02)	513.139	1024.26	1025.46	2	-0.1908	-186.1	180	187	TRUE
CG4389 CG4389-PB, isoform B [Drosophila melanogaster]	gi|24583077,gi|24583079	79622	1	27	31	210	0.000983	0.423	TRUE	A10.2977.2977.2.dta	ILDVIR	K	A	0.95	33.8	36.2	0	2		364.727	727.438	728.467	2	-0.02172	-29.82	277	282	TRUE
Na pump alpha subunit CG5670-PA, isoform A [Drosophila melanogaster]	gi|24648576,gi|24648578,gi|24648580,gi|45553435,gi|45553437,gi|45553439,gi|45553441	115591	1	24	29	209	0.000978	0.306	TRUE	S_E911.3261.3261.3.dta	VIMVTGDHPITAK	K	A	0.95	33.8	36.2	0	2		461.472	1381.39	1381.75	3	0.6489	469.4	631	643	TRUE
Fat body protein 1 CG17285-PA, isoform A [Drosophila melanogaster]	gi|24664081,gi|24664085	119646	1	22	30	257	0.0012	0.244	TRUE	S_E9.5107.5107.3.dta	FPQHLLLPR	R	G	0.95	33.8	36.5	0	2		374.414	1120.22	1120.66	3	0.5644	503.4	946	954	TRUE
stress-sensitive B CG16944-PA, isoform A [Drosophila melanogaster]	gi|18079273,gi|24641095	32892.2	1	18	26	349	0.00163	0.505	TRUE	S_E7.4718.4718.2.dta	EFTGLGNcLTK	R	I	0.95	33.8	36.1	0	2	c8: Carbamidomethyl (+57.02)	620.254	1238.49	1239.6	2	-0.1049	-84.62	154	164	TRUE
Glutamate dehydrogenase CG5320-PA, isoform A [Drosophila melanogaster]	gi|45549226	62520.3	1	18	19	156	0.00073	0.333	TRUE	S_F911.4182.4182.2.dta	FSLDVSR	R	D	0.95	33.8	36	0	2		412.248	822.48	823.431	2	0.05608	68.1	143	149	TRUE
ATP synthase-beta CG11154-PA, isoform A [Drosophila melanogaster]	gi|24638766	54091	1	17	26	585	0.00274	0.457	TRUE	S_F910.4403.4403.2.dta	LVPLEQTIK	K	G	0.95	33.8	35.9	0	2		520.651	1039.29	1040.64	2	-0.3413	-328.1	458	466	TRUE
ATP synthase-beta CG11154-PA, isoform A [Drosophila melanogaster]	gi|24638766	54091	1	17	26	585	0.00274	0.457	TRUE	S_E9.5163.5163.3.dta	IPSAVGYQPTLATDmGSMQER	R	I	0.95	33.8	36.1	1.72	2	m15: Oxidation (+15.99)	756.899	2267.67	2268.06	3	0.616	271.5	302	322	TRUE
Actin 87E CG18290-PA, isoform A [Drosophila melanogaster]	gi|17137090,gi|24646579	41784.9	1	15	24	417	0.00195	0.423	TRUE	S_F7.2492.2492.3.dta	QEYDESGPGIVHR	K	K	0.95	33.8	36.7	1.64	2		496.567	1486.68	1486.69	3	0.9918	666.7	361	373	TRUE	gi|17647135,gi|17975540
Catalase CG6871-PA [Drosophila melanogaster]	gi|17981717	57132.4	1	10	11	74	0.000346	0.263	TRUE	S_F1.4994.4994.2.dta	NSQTVSPGAITTGNGAPIGIK	K	D	0.95	33.8	35.9	0	2		992.253	1982.49	1983.05	2	0.4461	224.9	16	36	TRUE
CG16935 CG16935-PA [Drosophila melanogaster]	gi|45550423	39093.5	1	9	9	24	0.000112	0.291	TRUE	S_E912.6288.6288.2.dta	EIFELMEQGK	K	F	0.95	33.8	36.2	0	2		612.351	1222.69	1223.6	2	0.09528	77.86	310	319	TRUE
coracle CG11949-PA, isoform A [Drosophila melanogaster]	gi|24655527	184153	1	8	10	43	0.000201	0.073	TRUE	S_F1.2471.2471.3.dta	PAEIKPSAPAEPETPTK	M	S	0.95	33.8	36.5	0	2		588.343	1762	1762.92	3	0.08958	50.81	2	18	TRUE
CG6416 CG6416-PB, isoform B [Drosophila melanogaster]	gi|45550577	33004	1	8	9	33	0.000154	0.339	TRUE	B1.2361.2361.2.dta	DAPTTESYLR	K	H	0.95	33.8	36.1	0	2		576.712	1151.41	1152.55	2	-0.1371	-119	207	216	TRUE	gi|45552078,gi|24661058,gi|28574408
myospheroid CG1560-PA [Drosophila melanogaster]	gi|24640486	92638.1	1	7	7	17	7.95e-05	0.122	TRUE	S_F912.3248.3248.3.dta	YSEQGELHVYAQENK	K	E	0.95	33.8	36.2	0	2		599.225	1794.65	1794.83	3	0.8308	462.7	755	769	TRUE
lethal (3) neo18 CG9762-PA [Drosophila melanogaster]	gi|21356475	22012.8	1	6	6	39	0.000182	0.301	TRUE	S_F5.4144.4144.3.dta	NDYQAYYYRPSVAK	R	Y	0.95	33.8	36.3	0	2		580.415	1738.22	1737.82	3	1.406	808.4	155	168	TRUE
Saposin-related CG12070-PA, isoform A [Drosophila melanogaster]	gi|17864128,gi|28571996	105946	1	3	4	12	5.61e-05	0.0336	TRUE	S_F4.5316.5316.1.dta	IADLLLK	K	E	0.95	33.8	36.4	0	2		785.37	784.363	785.514	1	-0.1433	-182.5	719	725	TRUE
Myosin heavy chain CG17927-PF, isoform F [Drosophila melanogaster]	gi|24584700	224516	0.998	2	2	20	9.36e-05	0.548	FALSE	S_A12Dros.1345.1345.3.dta	SEELEEAKR	R	K	0.95	33.8	37.2	0	2		364.182	1089.52	1090.54	3	-0.006412	-5.88	1382	1390	FALSE	gi|24584704,gi|28574239,gi|24584706,gi|24584710,gi|24584702,gi|24584712,gi|24584698
Myosin heavy chain CG17927-PF, isoform F [Drosophila melanogaster]	gi|24584700	224516	0.998	2	2	20	9.36e-05	0.548	FALSE	S_A11Dros.1345.1345.3.dta	SEELEEAKR	R	K	0.95	33.8	36.8	0	2		364.603	1090.79	1090.54	3	1.255	1150	1382	1390	FALSE	gi|24584704,gi|28574239,gi|24584706,gi|24584710,gi|24584702,gi|24584712,gi|24584698
Myosin heavy chain CG17927-PF, isoform F [Drosophila melanogaster]	gi|24584700	224516	0.998	2	2	20	9.36e-05	0.548	FALSE	S_F2.4647.4647.2.dta	DLLQQVNPPK	K	Y	0.95	33.8	36.2	0	2		576.227	1150.44	1151.64	2	-0.196	-170.2	75	84	FALSE	gi|24584704,gi|28574239,gi|24584706,gi|24584710,gi|24584702,gi|24584712
Myosin heavy chain CG17927-PB, isoform B [Drosophila melanogaster]	gi|24584710	224397	0.998	2	2	9	4.21e-05	0.534	FALSE	S_A12Dros.1345.1345.3.dta	SEELEEAKR	R	K	0.95	33.8	37.2	0	2		364.182	1089.52	1090.54	3	-0.006412	-5.88	1382	1390	FALSE	gi|24584704,gi|24584700,gi|28574239,gi|24584706,gi|24584702,gi|24584712,gi|24584698
Myosin heavy chain CG17927-PB, isoform B [Drosophila melanogaster]	gi|24584710	224397	0.998	2	2	9	4.21e-05	0.534	FALSE	S_A11Dros.1345.1345.3.dta	SEELEEAKR	R	K	0.95	33.8	36.8	0	2		364.603	1090.79	1090.54	3	1.255	1150	1382	1390	FALSE	gi|24584704,gi|24584700,gi|28574239,gi|24584706,gi|24584702,gi|24584712,gi|24584698
Myosin heavy chain CG17927-PB, isoform B [Drosophila melanogaster]	gi|24584710	224397	0.998	2	2	9	4.21e-05	0.534	FALSE	S_F2.4647.4647.2.dta	DLLQQVNPPK	K	Y	0.95	33.8	36.2	0	2		576.227	1150.44	1151.64	2	-0.196	-170.2	75	84	FALSE	gi|24584704,gi|24584700,gi|28574239,gi|24584706,gi|24584702,gi|24584712
Actin 79B CG7478-PA [Drosophila melanogaster]	gi|17975540	41769.7	0.998	2	2	4	1.87e-05	0.388	FALSE	S_F7.2492.2492.3.dta	QEYDESGPGIVHR	K	K	0.95	33.8	36.7	1.64	2		496.567	1486.68	1486.69	3	0.9918	666.7	361	373	FALSE	gi|17647135,gi|17137090,gi|24646579
Myosin heavy chain CG17927-PJ, isoform J [Drosophila melanogaster]	gi|24584698	224394	0.998	2	2	3	1.4e-05	0.541	FALSE	S_A12Dros.1345.1345.3.dta	SEELEEAKR	R	K	0.95	33.8	37.2	0	2		364.182	1089.52	1090.54	3	-0.006412	-5.88	1380	1388	FALSE	gi|24584704,gi|24584700,gi|28574239,gi|24584706,gi|24584710,gi|24584702,gi|24584712
Myosin heavy chain CG17927-PJ, isoform J [Drosophila melanogaster]	gi|24584698	224394	0.998	2	2	3	1.4e-05	0.541	FALSE	S_A11Dros.1345.1345.3.dta	SEELEEAKR	R	K	0.95	33.8	36.8	0	2		364.603	1090.79	1090.54	3	1.255	1150	1380	1388	FALSE	gi|24584704,gi|24584700,gi|28574239,gi|24584706,gi|24584710,gi|24584702,gi|24584712
Actin 5C CG4027-PB, isoform B [Drosophila melanogaster]	gi|17530805,gi|24639997,gi|62473515,gi|62473526	41804.7	0.998	2	3	13	6.08e-05	0.364	TRUE	S_F9.2567.2567.3.dta	QEYDESGPSIVHR	K	K	0.95	33.8	36.6	0	2		506.393	1516.16	1516.7	3	0.4602	303.3	361	373	TRUE
CG6416 CG6416-PF, isoform F [Drosophila melanogaster]	gi|28574408	44451.7	0.5	1	1	5	2.34e-05	0.259	FALSE	B1.2361.2361.2.dta	DAPTTESYLR	K	H	0.95	33.8	36.1	0	2		576.712	1151.41	1152.55	2	-0.1371	-119	207	216	FALSE	gi|45552078,gi|24661058,gi|45550577
Myosin heavy chain CG17927-PK, isoform K [Drosophila melanogaster]	gi|24584712	221394	0.993	1	1	1	4.68e-06	0.52	FALSE	S_A12Dros.1345.1345.3.dta	SEELEEAKR	R	K	0.95	33.8	37.2	0	2		364.182	1089.52	1090.54	3	-0.006412	-5.88	1382	1390	FALSE	gi|24584704,gi|24584700,gi|28574239,gi|24584706,gi|24584710,gi|24584702,gi|24584698
Myosin heavy chain CG17927-PK, isoform K [Drosophila melanogaster]	gi|24584712	221394	0.993	1	1	1	4.68e-06	0.52	FALSE	S_A11Dros.1345.1345.3.dta	SEELEEAKR	R	K	0.95	33.8	36.8	0	2		364.603	1090.79	1090.54	3	1.255	1150	1382	1390	FALSE	gi|24584704,gi|24584700,gi|28574239,gi|24584706,gi|24584710,gi|24584702,gi|24584698
Myosin heavy chain CG17927-PK, isoform K [Drosophila melanogaster]	gi|24584712	221394	0.993	1	1	1	4.68e-06	0.52	FALSE	S_F2.4647.4647.2.dta	DLLQQVNPPK	K	Y	0.95	33.8	36.2	0	2		576.227	1150.44	1151.64	2	-0.196	-170.2	75	84	FALSE	gi|24584704,gi|24584700,gi|28574239,gi|24584706,gi|24584710,gi|24584702
CG6416 CG6416-PA, isoform A [Drosophila melanogaster]	gi|24661058,gi|45552078	27145.2	0.5	1	1	15	7.02e-05	0.197	FALSE	B1.2361.2361.2.dta	DAPTTESYLR	K	H	0.95	33.8	36.1	0	2		576.712	1151.41	1152.55	2	-0.1371	-119	44	53	FALSE	gi|28574408,gi|45550577
Myosin heavy chain CG17927-PD, isoform D [Drosophila melanogaster]	gi|24584702,gi|24584706	224480	0.994	1	1	38	0.000178	0.544	FALSE	S_A12Dros.1345.1345.3.dta	SEELEEAKR	R	K	0.95	33.8	37.2	0	2		364.182	1089.52	1090.54	3	-0.006412	-5.88	1382	1390	FALSE	gi|24584704,gi|24584700,gi|28574239,gi|24584710,gi|24584712,gi|24584698
Myosin heavy chain CG17927-PD, isoform D [Drosophila melanogaster]	gi|24584702,gi|24584706	224480	0.994	1	1	38	0.000178	0.544	FALSE	S_A11Dros.1345.1345.3.dta	SEELEEAKR	R	K	0.95	33.8	36.8	0	2		364.603	1090.79	1090.54	3	1.255	1150	1382	1390	FALSE	gi|24584704,gi|24584700,gi|28574239,gi|24584710,gi|24584712,gi|24584698
Myosin heavy chain CG17927-PD, isoform D [Drosophila melanogaster]	gi|24584702,gi|24584706	224480	0.994	1	1	38	0.000178	0.544	FALSE	S_F2.4647.4647.2.dta	DLLQQVNPPK	K	Y	0.95	33.8	36.2	0	2		576.227	1150.44	1151.64	2	-0.196	-170.2	75	84	FALSE	gi|24584704,gi|24584700,gi|28574239,gi|24584710,gi|24584712
Myosin heavy chain CG17927-PA, isoform A [Drosophila melanogaster]	gi|24584704,gi|28574239	224597	1	128	186	2330	0.0109	0.549	TRUE	S_F910.4703.4703.3.dta	NLEHDLDNLR	R	E	0.95	33.9	36.1	0	2		413.569	1237.68	1238.61	3	0.0775	62.56	1334	1343	TRUE	gi|24584700,gi|24584706,gi|24584710,gi|24584702,gi|24584712,gi|24584698
Myosin heavy chain CG17927-PA, isoform A [Drosophila melanogaster]	gi|24584704,gi|28574239	224597	1	128	186	2330	0.0109	0.549	TRUE	A7.4417.4417.2.dta	EGYLLGEIK	K	A	0.95	33.9	36.2	0	2		511.671	1021.33	1021.56	2	0.7773	760.3	45	53	TRUE	gi|24584700,gi|24584706,gi|24584710,gi|24584702,gi|24584712,gi|24584698
Myosin heavy chain CG17927-PA, isoform A [Drosophila melanogaster]	gi|24584704,gi|28574239	224597	1	128	186	2330	0.0109	0.549	TRUE	S_A9Dros.2671.2671.3.dta	LKGAYEEGQEQLEAVR	R	R	0.95	33.9	36.3	1.72	2		607.314	1818.92	1819.92	3	0.008207	4.51	1483	1498	TRUE	gi|24584700,gi|24584706,gi|24584710,gi|24584702,gi|24584712,gi|24584698
Myosin heavy chain CG17927-PA, isoform A [Drosophila melanogaster]	gi|24584704,gi|28574239	224597	1	128	186	2330	0.0109	0.549	TRUE	S_E911.5384.5384.2.dta	FIDLPEDQYR	K	L	0.95	33.9	36.2	0	2		648.69	1295.36	1295.63	2	0.7441	574	747	756	TRUE	gi|24584698
Myosin heavy chain CG17927-PA, isoform A [Drosophila melanogaster]	gi|24584704,gi|28574239	224597	1	128	186	2330	0.0109	0.549	TRUE	S_A11Dros.3604.3604.3.dta	KLEADINELEIALDHANK	K	A	0.95	33.9	36.3	0	2		679.431	2035.27	2036.07	3	0.2108	103.5	1616	1633	TRUE	gi|24584700,gi|24584706,gi|24584710,gi|24584702,gi|24584712,gi|24584698
terribly reduced optic lobes CG33950-PF, isoform F [Drosophila melanogaster]	gi|78706474	513388	1	89	107	871	0.00408	0.237	TRUE	S_A9Dros.3552.3552.2.dta	TDSQILVLTNLRPEDAGR	R	Y	0.95	33.9	36.1	0	2		999.915	1997.81	1998.06	2	0.7594	379.9	3684	3701	TRUE	gi|161077537
Paramyosin CG5939-PA, isoform A [Drosophila melanogaster]	gi|24661112,gi|24661116	102322	1	39	51	578	0.0027	0.494	TRUE	S_F2.2698.2698.3.dta	LEEAEGGAEHQFEANR	R	K	0.95	33.9	36.7	0	2		596.421	1786.24	1786.8	3	0.4487	251	79	94	TRUE
zormin CG33484-PD, isoform D [Drosophila melanogaster]	gi|116007762	411353	1	35	37	226	0.00106	0.131	TRUE	S_E9.2907.2907.3.dta	GSGLPASSDVQTVSQEHNTESSR	R	V	0.95	33.9	36	1.28	2		791.934	2372.78	2373.09	3	0.6937	292.2	2004	2026	TRUE
Aconitase CG9244-PB, isoform B [Drosophila melanogaster]	gi|17864292	85383.5	1	27	37	473	0.00221	0.417	TRUE	S_F910.4761.4761.3.dta	VAVPSTVHcDHLIEAQIGGPK	K	D	0.95	33.9	36.2	1.7	2	c9: Carbamidomethyl (+57.02)	743.253	2226.74	2228.15	3	-0.4066	-182.5	125	145	TRUE
bellwether CG3612-PA [Drosophila melanogaster]	gi|24658560	59405.3	1	27	35	476	0.00223	0.411	TRUE	A5.3689.3689.2.dta	AVDSLVPIGR	K	G	0.95	33.9	36	0	2		513.646	1025.28	1026.59	2	-0.3102	-302.3	194	203	TRUE
Cytochrome P450-4g1 CG3972-PA [Drosophila melanogaster]	gi|17933498	62954.7	1	24	31	601	0.00281	0.39	TRUE	S_A11Dros.1947.1947.2.dta	LDSIYK	R	F	0.95	33.9	35.5	0	2		369.599	737.182	738.404	2	-0.2144	-290.5	245	250	TRUE
stress-sensitive B CG16944-PA, isoform A [Drosophila melanogaster]	gi|18079273,gi|24641095	32892.2	1	18	26	349	0.00163	0.505	TRUE	S_A6Dros.3249.3249.1.dta	GMVDcFIR	K	I	0.95	33.9	36.1	0	2	c5: Carbamidomethyl (+57.02)	998.394	997.386	997.46	1	0.9335	935	55	62	TRUE
upheld CG7107-PF, isoform F [Drosophila melanogaster]	gi|62473664	47113.5	1	17	23	236	0.0011	0.405	TRUE	S_F9.3612.3612.3.dta	KPPQTPAEGEGDPEFIK	K	R	0.95	33.9	36.3	1.89	2		614.446	1840.31	1839.91	3	1.409	765.3	21	37	TRUE
ATP synthase-beta CG11154-PA, isoform A [Drosophila melanogaster]	gi|24638766	54091	1	17	26	585	0.00274	0.457	TRUE	A9.4560.4560.2.dta	IINVIGEPIDER	R	G	0.95	33.9	36.1	0	2		684.122	1366.23	1367.75	2	-0.518	-378.9	121	132	TRUE
Actin 87E CG18290-PA, isoform A [Drosophila melanogaster]	gi|17137090,gi|24646579	41784.9	1	15	24	417	0.00195	0.423	TRUE	S_G3.5528.5528.3.dta	VAPEEHPVLLTEAPLNPK	R	A	0.95	33.9	36.3	0	2		651.899	1952.67	1954.07	3	-0.3825	-195.8	97	114	TRUE	gi|17647135,gi|62473515,gi|62473526,gi|24639997,gi|17975540,gi|17530805
Actin 87E CG18290-PA, isoform A [Drosophila melanogaster]	gi|17137090,gi|24646579	41784.9	1	15	24	417	0.00195	0.423	TRUE	A8.4449.4450.3.dta	VAPEEHPVLLTEAPLNPK	R	A	0.95	33.9	36.2	0	2		652.271	1953.79	1954.07	3	0.7314	374.2	97	114	TRUE	gi|17647135,gi|62473515,gi|62473526,gi|24639997,gi|17975540,gi|17530805
CG30084 CG30084-PF, isoform F [Drosophila melanogaster]	gi|161077121,gi|78709100	238039	1	12	13	100	0.000468	0.0702	TRUE	S_E7.4599.4599.3.dta	RPLQDIGFVEEK	R	G	0.95	33.9	36.8	0	2		477.509	1429.5	1430.76	3	-0.2519	-176.1	2053	2064	TRUE	gi|78707228,gi|116007706
Nidogen/entactin CG12908-PA, isoform A [Drosophila melanogaster]	gi|24652408,gi|45552547	149062	1	12	12	41	0.000192	0.102	TRUE	S_G1.4801.4801.2.dta	VYWGDISTK	R	K	0.95	33.9	36.2	0	2		535.204	1068.39	1068.54	2	0.863	807	1086	1094	TRUE
CG10097 CG10097-PB, isoform B [Drosophila melanogaster]	gi|78706758	56986.7	1	11	14	80	0.000374	0.271	TRUE	S_E912.2923.2923.3.dta	VLDmHNSVSSETFEK	K	M	0.95	33.9	36.2	0	2	m4: Oxidation (+15.99)	580.501	1738.48	1738.8	3	0.6917	397.6	179	193	TRUE
Vacuolar H[+]-ATPase 26kD E subunit CG1088-PB, isoform B [Drosophila melanogaster]	gi|17737775,gi|24644298	26064.3	1	8	9	22	0.000103	0.341	TRUE	S_A6Dros.2129.2129.3.dta	VREDHVSSVLDDAR	K	K	0.95	33.9	36.5	1.55	2		533.276	1596.81	1597.79	3	0.0199	12.46	86	99	TRUE
Ribosomal protein S3A CG2168-PA, isoform A [Drosophila melanogaster]	gi|17864162	30322.5	1	7	8	33	0.000154	0.276	TRUE	A6.3226.3226.2.dta	TVDGYLLR	K	V	0.95	33.9	35.9	0	2		469.119	936.222	936.516	2	0.7139	761.7	132	139	TRUE
CG2233 CG2233-PA [Drosophila melanogaster]	gi|18921139	46492.2	1	6	8	24	0.000112	0.14	TRUE	S_F910.4538.4538.2.dta	SELDAYLAK	K	E	0.95	33.9	36	0	2		505.243	1008.47	1009.52	2	-0.04322	-42.81	207	215	TRUE
CG31548 CG31548-PA [Drosophila melanogaster]	gi|24644339	27139	1	4	4	28	0.000131	0.199	TRUE	S_E7.6795.6795.2.dta	SFPGVLAYNISK	R	M	0.95	33.9	36.2	0	2		648.75	1295.48	1295.7	2	0.7915	610.5	147	158	TRUE
Myosin heavy chain CG17927-PF, isoform F [Drosophila melanogaster]	gi|24584700	224516	0.998	2	2	20	9.36e-05	0.548	FALSE	S_F910.4703.4703.3.dta	NLEHDLDNLR	R	E	0.95	33.9	36.1	0	2		413.569	1237.68	1238.61	3	0.0775	62.56	1334	1343	FALSE	gi|24584704,gi|28574239,gi|24584706,gi|24584710,gi|24584702,gi|24584712,gi|24584698
Myosin heavy chain CG17927-PF, isoform F [Drosophila melanogaster]	gi|24584700	224516	0.998	2	2	20	9.36e-05	0.548	FALSE	A7.4417.4417.2.dta	EGYLLGEIK	K	A	0.95	33.9	36.2	0	2		511.671	1021.33	1021.56	2	0.7773	760.3	45	53	FALSE	gi|24584704,gi|28574239,gi|24584706,gi|24584710,gi|24584702,gi|24584712,gi|24584698
Myosin heavy chain CG17927-PF, isoform F [Drosophila melanogaster]	gi|24584700	224516	0.998	2	2	20	9.36e-05	0.548	FALSE	S_A9Dros.2671.2671.3.dta	LKGAYEEGQEQLEAVR	R	R	0.95	33.9	36.3	1.72	2		607.314	1818.92	1819.92	3	0.008207	4.51	1483	1498	FALSE	gi|24584704,gi|28574239,gi|24584706,gi|24584710,gi|24584702,gi|24584712,gi|24584698
Myosin heavy chain CG17927-PF, isoform F [Drosophila melanogaster]	gi|24584700	224516	0.998	2	2	20	9.36e-05	0.548	FALSE	S_A11Dros.3604.3604.3.dta	KLEADINELEIALDHANK	K	A	0.95	33.9	36.3	0	2		679.431	2035.27	2036.07	3	0.2108	103.5	1616	1633	FALSE	gi|24584704,gi|28574239,gi|24584706,gi|24584710,gi|24584702,gi|24584712,gi|24584698
Myosin heavy chain CG17927-PB, isoform B [Drosophila melanogaster]	gi|24584710	224397	0.998	2	2	9	4.21e-05	0.534	FALSE	S_F910.4703.4703.3.dta	NLEHDLDNLR	R	E	0.95	33.9	36.1	0	2		413.569	1237.68	1238.61	3	0.0775	62.56	1334	1343	FALSE	gi|24584704,gi|24584700,gi|28574239,gi|24584706,gi|24584702,gi|24584712,gi|24584698
Myosin heavy chain CG17927-PB, isoform B [Drosophila melanogaster]	gi|24584710	224397	0.998	2	2	9	4.21e-05	0.534	FALSE	A7.4417.4417.2.dta	EGYLLGEIK	K	A	0.95	33.9	36.2	0	2		511.671	1021.33	1021.56	2	0.7773	760.3	45	53	FALSE	gi|24584704,gi|24584700,gi|28574239,gi|24584706,gi|24584702,gi|24584712,gi|24584698
Myosin heavy chain CG17927-PB, isoform B [Drosophila melanogaster]	gi|24584710	224397	0.998	2	2	9	4.21e-05	0.534	FALSE	S_A9Dros.2671.2671.3.dta	LKGAYEEGQEQLEAVR	R	R	0.95	33.9	36.3	1.72	2		607.314	1818.92	1819.92	3	0.008207	4.51	1483	1498	FALSE	gi|24584704,gi|24584700,gi|28574239,gi|24584706,gi|24584702,gi|24584712,gi|24584698
Myosin heavy chain CG17927-PB, isoform B [Drosophila melanogaster]	gi|24584710	224397	0.998	2	2	9	4.21e-05	0.534	FALSE	S_A11Dros.3604.3604.3.dta	KLEADINELEIALDHANK	K	A	0.95	33.9	36.3	0	2		679.431	2035.27	2036.07	3	0.2108	103.5	1616	1633	FALSE	gi|24584704,gi|24584700,gi|28574239,gi|24584706,gi|24584702,gi|24584712,gi|24584698
sick CG34343-PD, isoform D [Drosophila melanogaster]	gi|161076970	214897	1	2	2	2	9.36e-06	0.0124	TRUE	A6.69.69.3.dta	TQLPTTIEER	R	I	0.95	33.9	37.2	0	2		396.374	1186.1	1187.63	3	-0.5197	-437.8	598	607	TRUE
Actin 79B CG7478-PA [Drosophila melanogaster]	gi|17975540	41769.7	0.998	2	2	4	1.87e-05	0.388	FALSE	S_G3.5528.5528.3.dta	VAPEEHPVLLTEAPLNPK	R	A	0.95	33.9	36.3	0	2		651.899	1952.67	1954.07	3	-0.3825	-195.8	97	114	FALSE	gi|17647135,gi|62473515,gi|62473526,gi|24639997,gi|17530805,gi|17137090,gi|24646579
Actin 79B CG7478-PA [Drosophila melanogaster]	gi|17975540	41769.7	0.998	2	2	4	1.87e-05	0.388	FALSE	A8.4449.4450.3.dta	VAPEEHPVLLTEAPLNPK	R	A	0.95	33.9	36.2	0	2		652.271	1953.79	1954.07	3	0.7314	374.2	97	114	FALSE	gi|17647135,gi|62473515,gi|62473526,gi|24639997,gi|17530805,gi|17137090,gi|24646579
Myosin heavy chain CG17927-PJ, isoform J [Drosophila melanogaster]	gi|24584698	224394	0.998	2	2	3	1.4e-05	0.541	FALSE	S_F910.4703.4703.3.dta	NLEHDLDNLR	R	E	0.95	33.9	36.1	0	2		413.569	1237.68	1238.61	3	0.0775	62.56	1332	1341	FALSE	gi|24584704,gi|24584700,gi|28574239,gi|24584706,gi|24584710,gi|24584702,gi|24584712
Myosin heavy chain CG17927-PJ, isoform J [Drosophila melanogaster]	gi|24584698	224394	0.998	2	2	3	1.4e-05	0.541	FALSE	A7.4417.4417.2.dta	EGYLLGEIK	K	A	0.95	33.9	36.2	0	2		511.671	1021.33	1021.56	2	0.7773	760.3	45	53	FALSE	gi|24584704,gi|24584700,gi|28574239,gi|24584706,gi|24584710,gi|24584702,gi|24584712
Myosin heavy chain CG17927-PJ, isoform J [Drosophila melanogaster]	gi|24584698	224394	0.998	2	2	3	1.4e-05	0.541	FALSE	S_A9Dros.2671.2671.3.dta	LKGAYEEGQEQLEAVR	R	R	0.95	33.9	36.3	1.72	2		607.314	1818.92	1819.92	3	0.008207	4.51	1481	1496	FALSE	gi|24584704,gi|24584700,gi|28574239,gi|24584706,gi|24584710,gi|24584702,gi|24584712
Myosin heavy chain CG17927-PJ, isoform J [Drosophila melanogaster]	gi|24584698	224394	0.998	2	2	3	1.4e-05	0.541	FALSE	S_E911.5384.5384.2.dta	FIDLPEDQYR	K	L	0.95	33.9	36.2	0	2		648.69	1295.36	1295.63	2	0.7441	574	745	754	FALSE	gi|24584704,gi|28574239
Myosin heavy chain CG17927-PJ, isoform J [Drosophila melanogaster]	gi|24584698	224394	0.998	2	2	3	1.4e-05	0.541	FALSE	S_A11Dros.3604.3604.3.dta	KLEADINELEIALDHANK	K	A	0.95	33.9	36.3	0	2		679.431	2035.27	2036.07	3	0.2108	103.5	1614	1631	FALSE	gi|24584704,gi|24584700,gi|28574239,gi|24584706,gi|24584710,gi|24584702,gi|24584712
Actin 5C CG4027-PB, isoform B [Drosophila melanogaster]	gi|17530805,gi|24639997,gi|62473515,gi|62473526	41804.7	0.998	2	3	13	6.08e-05	0.364	FALSE	S_G3.5528.5528.3.dta	VAPEEHPVLLTEAPLNPK	R	A	0.95	33.9	36.3	0	2		651.899	1952.67	1954.07	3	-0.3825	-195.8	97	114	FALSE	gi|17647135,gi|17975540,gi|17137090,gi|24646579
Actin 5C CG4027-PB, isoform B [Drosophila melanogaster]	gi|17530805,gi|24639997,gi|62473515,gi|62473526	41804.7	0.998	2	3	13	6.08e-05	0.364	FALSE	A8.4449.4450.3.dta	VAPEEHPVLLTEAPLNPK	R	A	0.95	33.9	36.2	0	2		652.271	1953.79	1954.07	3	0.7314	374.2	97	114	FALSE	gi|17647135,gi|17975540,gi|17137090,gi|24646579
Actin 57B CG10067-PA, isoform A [Drosophila melanogaster]	gi|17647135	41817.9	0.5	1	2	54	0.000253	0.423	FALSE	S_G3.5528.5528.3.dta	VAPEEHPVLLTEAPLNPK	R	A	0.95	33.9	36.3	0	2		651.899	1952.67	1954.07	3	-0.3825	-195.8	97	114	FALSE	gi|62473515,gi|62473526,gi|24639997,gi|17975540,gi|17530805,gi|17137090,gi|24646579
Actin 57B CG10067-PA, isoform A [Drosophila melanogaster]	gi|17647135	41817.9	0.5	1	2	54	0.000253	0.423	FALSE	A8.4449.4450.3.dta	VAPEEHPVLLTEAPLNPK	R	A	0.95	33.9	36.2	0	2		652.271	1953.79	1954.07	3	0.7314	374.2	97	114	FALSE	gi|62473515,gi|62473526,gi|24639997,gi|17975540,gi|17530805,gi|17137090,gi|24646579
terribly reduced optic lobes CG33950-PG, isoform G [Drosophila melanogaster]	gi|161077537	459070	0.5	1	1	4	1.87e-05	0.256	FALSE	S_A9Dros.3552.3552.2.dta	TDSQILVLTNLRPEDAGR	R	Y	0.95	33.9	36.1	0	2		999.915	1997.81	1998.06	2	0.7594	379.9	3211	3228	FALSE	gi|78706474
CG30084 CG30084-PG, isoform G [Drosophila melanogaster]	gi|116007706,gi|78707228	95990.3	0.5	1	1	1	4.68e-06	0.182	FALSE	S_E7.4599.4599.3.dta	RPLQDIGFVEEK	R	G	0.95	33.9	36.8	0	2		477.509	1429.5	1430.76	3	-0.2519	-176.1	749	760	FALSE	gi|78709100,gi|161077121
Myosin heavy chain CG17927-PK, isoform K [Drosophila melanogaster]	gi|24584712	221394	0.993	1	1	1	4.68e-06	0.52	FALSE	S_F910.4703.4703.3.dta	NLEHDLDNLR	R	E	0.95	33.9	36.1	0	2		413.569	1237.68	1238.61	3	0.0775	62.56	1334	1343	FALSE	gi|24584704,gi|24584700,gi|28574239,gi|24584706,gi|24584710,gi|24584702,gi|24584698
Myosin heavy chain CG17927-PK, isoform K [Drosophila melanogaster]	gi|24584712	221394	0.993	1	1	1	4.68e-06	0.52	FALSE	A7.4417.4417.2.dta	EGYLLGEIK	K	A	0.95	33.9	36.2	0	2		511.671	1021.33	1021.56	2	0.7773	760.3	45	53	FALSE	gi|24584704,gi|24584700,gi|28574239,gi|24584706,gi|24584710,gi|24584702,gi|24584698
Myosin heavy chain CG17927-PK, isoform K [Drosophila melanogaster]	gi|24584712	221394	0.993	1	1	1	4.68e-06	0.52	FALSE	S_A9Dros.2671.2671.3.dta	LKGAYEEGQEQLEAVR	R	R	0.95	33.9	36.3	1.72	2		607.314	1818.92	1819.92	3	0.008207	4.51	1483	1498	FALSE	gi|24584704,gi|24584700,gi|28574239,gi|24584706,gi|24584710,gi|24584702,gi|24584698
Myosin heavy chain CG17927-PK, isoform K [Drosophila melanogaster]	gi|24584712	221394	0.993	1	1	1	4.68e-06	0.52	FALSE	S_A11Dros.3604.3604.3.dta	KLEADINELEIALDHANK	K	A	0.95	33.9	36.3	0	2		679.431	2035.27	2036.07	3	0.2108	103.5	1616	1633	FALSE	gi|24584704,gi|24584700,gi|28574239,gi|24584706,gi|24584710,gi|24584702,gi|24584698
Myosin heavy chain CG17927-PD, isoform D [Drosophila melanogaster]	gi|24584702,gi|24584706	224480	0.994	1	1	38	0.000178	0.544	FALSE	S_F910.4703.4703.3.dta	NLEHDLDNLR	R	E	0.95	33.9	36.1	0	2		413.569	1237.68	1238.61	3	0.0775	62.56	1334	1343	FALSE	gi|24584704,gi|24584700,gi|28574239,gi|24584710,gi|24584712,gi|24584698
Myosin heavy chain CG17927-PD, isoform D [Drosophila melanogaster]	gi|24584702,gi|24584706	224480	0.994	1	1	38	0.000178	0.544	FALSE	A7.4417.4417.2.dta	EGYLLGEIK	K	A	0.95	33.9	36.2	0	2		511.671	1021.33	1021.56	2	0.7773	760.3	45	53	FALSE	gi|24584704,gi|24584700,gi|28574239,gi|24584710,gi|24584712,gi|24584698
Myosin heavy chain CG17927-PD, isoform D [Drosophila melanogaster]	gi|24584702,gi|24584706	224480	0.994	1	1	38	0.000178	0.544	FALSE	S_A9Dros.2671.2671.3.dta	LKGAYEEGQEQLEAVR	R	R	0.95	33.9	36.3	1.72	2		607.314	1818.92	1819.92	3	0.008207	4.51	1483	1498	FALSE	gi|24584704,gi|24584700,gi|28574239,gi|24584710,gi|24584712,gi|24584698
Myosin heavy chain CG17927-PD, isoform D [Drosophila melanogaster]	gi|24584702,gi|24584706	224480	0.994	1	1	38	0.000178	0.544	FALSE	S_A11Dros.3604.3604.3.dta	KLEADINELEIALDHANK	K	A	0.95	33.9	36.3	0	2		679.431	2035.27	2036.07	3	0.2108	103.5	1616	1633	FALSE	gi|24584704,gi|24584700,gi|28574239,gi|24584710,gi|24584712,gi|24584698
cytochrome b [Drosophila melanogaster]	gi|5835245	43209.5	0.5	1	1	1	4.68e-06	0.0238	TRUE	S_E7.7466.7466.2.dta	DVNYGWLLR	R	T	0.95	33.9	36.2	0	2		568.764	1135.51	1135.59	2	0.9296	817.9	73	81	TRUE
CG6608 CG6608-PA, isoform A [Drosophila melanogaster]	gi|21356397,gi|24645815	36661.4	0.5	1	1	4	1.87e-05	0.0572	TRUE	S_F9.2558.2558.2.dta	AVTTGSTSEATTTTTPVPR	M	R	0.95	33.9	36.2	0	2		939.739	1877.46	1877.95	2	0.5239	278.9	2	20	TRUE
Myosin heavy chain CG17927-PA, isoform A [Drosophila melanogaster]	gi|24584704,gi|28574239	224597	1	128	186	2330	0.0109	0.549	TRUE	S_A9Dros.1424.1424.3.dta	KADQEISGLKK	K	D	0.95	34	37	0	2		406.177	1215.51	1216.69	3	-0.174	-143	941	951	TRUE	gi|24584700,gi|24584706,gi|24584710,gi|24584702,gi|24584712,gi|24584698
Myosin heavy chain CG17927-PA, isoform A [Drosophila melanogaster]	gi|24584704,gi|28574239	224597	1	128	186	2330	0.0109	0.549	TRUE	S_F1.4840.4840.3.dta	VDDLAAELDASQK	K	E	0.95	34	36.8	0	2		459.028	1374.06	1374.68	3	0.393	285.8	1459	1471	TRUE	gi|24584700,gi|24584706,gi|24584710,gi|24584702,gi|24584712,gi|24584698
Myosin heavy chain CG17927-PA, isoform A [Drosophila melanogaster]	gi|24584704,gi|28574239	224597	1	128	186	2330	0.0109	0.549	TRUE	S_A12Dros.1304.1304.2.dta	SKYESDGVAR	R	S	0.95	34	36.2	0	2		556.225	1110.43	1111.54	2	-0.09672	-87.02	1372	1381	TRUE	gi|24584700,gi|24584706,gi|24584710,gi|24584702,gi|24584712,gi|24584698
sallimus CG1915-PC, isoform C [Drosophila melanogaster]	gi|161080703	2.06604e+06	1	83	86	363	0.0017	0.0614	TRUE	S_A4Dros.2101.2101.2.dta	LPEKIEPK	K	E	0.95	34	35.7	0	2		477.648	953.28	953.567	2	0.7201	754.6	7072	7079	TRUE
sallimus CG1915-PC, isoform C [Drosophila melanogaster]	gi|161080703	2.06604e+06	1	83	86	363	0.0017	0.0614	TRUE	S_G2.4481.4481.2.dta	ELEcPQGQQADTSAPLVAEPPK	R	F	0.95	34	36	0	2	c4: Carbamidomethyl (+57.02)	1182.95	2363.89	2365.14	2	-0.2337	-98.81	3243	3264	TRUE
Papilin CG33103-PA, isoform A [Drosophila melanogaster]	gi|28572036	312636	1	51	58	438	0.00205	0.228	TRUE	S_F1.3858.3858.3.dta	ISSSGEHTVEEDAVcLK	R	E	0.95	34	36.4	1.49	2	c15: Carbamidomethyl (+57.02)	620.935	1859.78	1860.87	3	-0.07556	-40.61	427	443	TRUE
Papilin CG33103-PA, isoform A [Drosophila melanogaster]	gi|28572036	312636	1	51	58	438	0.00205	0.228	TRUE	S_F912.2783.2783.3.dta	VLPEEDcVEEKPETEK	R	S	0.95	34	36.5	0	2	c7: Carbamidomethyl (+57.02)	644.174	1929.5	1930.9	3	-0.3894	-201.7	498	513	TRUE
Paramyosin CG5939-PA, isoform A [Drosophila melanogaster]	gi|24661112,gi|24661116	102322	1	39	51	578	0.0027	0.494	TRUE	S_F1.3829.3829.2.dta	LAADFNQYR	R	H	0.95	34	35.9	0	2		548.916	1095.82	1097.54	2	-0.7135	-650.5	490	498	TRUE
CG1516 CG1516-PE, isoform E [Drosophila melanogaster]	gi|19921944,gi|24652210,gi|24652212,gi|24652214,gi|24652216,gi|24652218,gi|24652220,gi|24652222,gi|24652224	130848	1	36	39	469	0.00219	0.346	TRUE	S_F1.5397.5397.2.dta	TLYAPFEcTTTmR	R	S	0.95	34	36.3	0	2	c8: Carbamidomethyl (+57.02), m12: Oxidation (+15.99)	803.749	1605.48	1606.72	2	-0.234	-145.7	846	858	TRUE
Laminin B2 CG3322-PA [Drosophila melanogaster]	gi|17737557	182321	1	30	31	130	0.000608	0.241	TRUE	S_A11Dros.1213.1213.3.dta	cQcKPGVTGDK	K	C	0.95	34	36.7	0	2	c1: Carbamidomethyl (+57.02), c3: Carbamidomethyl (+57.02)	417.227	1248.66	1249.57	3	0.09947	79.6	432	442	TRUE
CG4389 CG4389-PB, isoform B [Drosophila melanogaster]	gi|24583077,gi|24583079	79622	1	27	31	210	0.000983	0.423	TRUE	S_F912.7092.7092.2.dta	MQLLEIITHPGTSK	K	D	0.95	34	36.3	0	2		784.675	1567.33	1567.85	2	0.4894	312	479	492	TRUE
stress-sensitive B CG16944-PA, isoform A [Drosophila melanogaster]	gi|18079273,gi|24641095	32892.2	1	18	26	349	0.00163	0.505	TRUE	A6.4725.4725.2.dta	SDGIVGLYR	K	G	0.95	34	36.1	0	2		490.057	978.098	979.521	2	-0.4159	-424.8	168	176	TRUE
ATP synthase-beta CG11154-PA, isoform A [Drosophila melanogaster]	gi|24638766	54091	1	17	26	585	0.00274	0.457	TRUE	S_F910.10218.10218.2.dta	IINVIGEPIDER	R	G	0.95	34	36.2	0	2		684.271	1366.53	1367.75	2	-0.219	-160.2	121	132	TRUE
CG6206 CG6206-PA, isoform A [Drosophila melanogaster]	gi|19921088	122670	1	16	18	68	0.000318	0.181	TRUE	S_F7.4268.4268.2.dta	IPVPYSNYR	R	I	0.95	34	36.2	0	2		554.731	1107.45	1108.58	2	-0.1244	-112.2	520	528	TRUE
CG6206 CG6206-PA, isoform A [Drosophila melanogaster]	gi|19921088	122670	1	16	18	68	0.000318	0.181	TRUE	S_E5.4286.4286.2.dta	IPVPYSNYR	R	I	0.95	34	36.2	0	2		554.844	1107.67	1108.58	2	0.1004	90.55	520	528	TRUE
Zeelin1 CG6803-PB, isoform B [Drosophila melanogaster]	gi|21357797	41650.6	1	13	14	71	0.000332	0.405	TRUE	S_A7Dros.3249.3249.2.dta	AGSEPYVPPPSYWNR	R	E	0.95	34	36.3	0	2		860.34	1718.66	1719.81	2	-0.1414	-82.24	176	190	TRUE
CG9090 CG9090-PA [Drosophila melanogaster]	gi|24656137	40535.9	1	13	16	119	0.000557	0.299	TRUE	S_E7.4473.4475.2.dta	SVFTGFR	K	I	0.95	34	36.1	0	2		407.11	812.205	813.426	2	-0.2134	-262.5	112	118	TRUE
CG7998 CG7998-PA [Drosophila melanogaster]	gi|24647881	35300.4	1	13	16	156	0.00073	0.366	TRUE	A7.5403.5403.2.dta	GSDVVVIPAGVPR	K	K	0.95	34	36.3	0	2		633.758	1265.5	1265.72	2	0.7868	621.2	92	104	TRUE
CG11963 CG11963-PB, isoform B [Drosophila melanogaster]	gi|161078106,gi|24645208	54791.9	1	12	12	179	0.000837	0.259	TRUE	S_F6.4328.4328.3.dta	NGLKGGVRVVYDPQTAEELSSK	K	M	0.95	34	36.2	0	2		783.241	2346.7	2347.23	3	0.4824	205.5	98	119	TRUE
Succinyl coenzyme A synthetase flavoprotein subunit CG17246-PA, isoform A [Drosophila melanogaster]	gi|17137288,gi|24655642,gi|24655647	72325.6	1	11	14	78	0.000365	0.25	TRUE	S_F910.3702.3702.3.dta	VREDEYDFSKPLDGQQK	K	K	0.95	34	36.3	2.41	2		685.649	2053.92	2053.98	3	0.949	461.8	597	613	TRUE
Rtnl1 CG33113-PF, isoform F [Drosophila melanogaster]	gi|28574660	63921.1	1	8	8	56	0.000262	0.185	TRUE	S_F6.3297.3297.2.dta	VVPVAPVESTQPQPK	K	I	0.95	34	36.4	0	2		788.886	1575.76	1575.87	2	0.8887	563.6	371	385	TRUE
Mitochondrial phosphate carrier protein CG4994-PA, isoform A [Drosophila melanogaster]	gi|24664191,gi|24664195	38832.9	1	8	12	46	0.000215	0.32	TRUE	S_E7.5233.5233.3.dta	VALGIPRPPPPEmPASLK	K	A	0.95	34	36.5	0	2	m13: Oxidation (+15.99)	629.216	1884.62	1886.06	3	-0.4264	-226.1	335	352	TRUE
wings up A CG7178-PB, isoform B [Drosophila melanogaster]	gi|24642959	24408.2	1	5	7	54	0.000253	0.351	TRUE	S_E7.5465.5466.3.dta	KDYEINDLNAQVNDLR	R	G	0.95	34	36.3	0	2		641.081	1920.22	1919.95	3	1.282	667.4	120	135	TRUE
Ribosomal protein S6 CG10944-PB, isoform B [Drosophila melanogaster]	gi|17737290	28390.4	1	4	5	25	0.000117	0.169	TRUE	A6.4040.4040.2.dta	LITPVVLQR	R	K	0.95	34	35.9	0	2		520.237	1038.46	1038.67	2	0.7978	767.5	180	188	TRUE
Ribosomal protein L22 CG7434-PA [Drosophila melanogaster]	gi|17137152	30594.1	1	4	4	17	7.95e-05	0.14	TRUE	S_A6Dros.1381.1381.2.dta	AASTPAAAPPAK	K	K	0.95	34	35.9	0	2		527.206	1052.4	1052.57	2	0.8294	787.3	120	131	TRUE
Myosin heavy chain CG17927-PF, isoform F [Drosophila melanogaster]	gi|24584700	224516	0.998	2	2	20	9.36e-05	0.548	FALSE	S_A9Dros.1424.1424.3.dta	KADQEISGLKK	K	D	0.95	34	37	0	2		406.177	1215.51	1216.69	3	-0.174	-143	941	951	FALSE	gi|24584704,gi|28574239,gi|24584706,gi|24584710,gi|24584702,gi|24584712,gi|24584698
Myosin heavy chain CG17927-PF, isoform F [Drosophila melanogaster]	gi|24584700	224516	0.998	2	2	20	9.36e-05	0.548	FALSE	S_F1.4840.4840.3.dta	VDDLAAELDASQK	K	E	0.95	34	36.8	0	2		459.028	1374.06	1374.68	3	0.393	285.8	1459	1471	FALSE	gi|24584704,gi|28574239,gi|24584706,gi|24584710,gi|24584702,gi|24584712,gi|24584698
Myosin heavy chain CG17927-PF, isoform F [Drosophila melanogaster]	gi|24584700	224516	0.998	2	2	20	9.36e-05	0.548	FALSE	S_A12Dros.1304.1304.2.dta	SKYESDGVAR	R	S	0.95	34	36.2	0	2		556.225	1110.43	1111.54	2	-0.09672	-87.02	1372	1381	FALSE	gi|24584704,gi|28574239,gi|24584706,gi|24584710,gi|24584702,gi|24584712,gi|24584698
refractory to sigma P CG10360-PA, isoform A [Drosophila melanogaster]	gi|17136432,gi|62471647	65284.8	0.998	2	2	16	7.49e-05	0.0634	TRUE	S_E9.2301.2301.2.dta	AAEQTESPPQAEPTVTAEK	K	A	0.95	34	36.3	0	2		993.08	1984.14	1983.95	2	1.2	604.7	258	276	TRUE
Myosin heavy chain CG17927-PB, isoform B [Drosophila melanogaster]	gi|24584710	224397	0.998	2	2	9	4.21e-05	0.534	FALSE	S_A9Dros.1424.1424.3.dta	KADQEISGLKK	K	D	0.95	34	37	0	2		406.177	1215.51	1216.69	3	-0.174	-143	941	951	FALSE	gi|24584704,gi|24584700,gi|28574239,gi|24584706,gi|24584702,gi|24584712,gi|24584698
Myosin heavy chain CG17927-PB, isoform B [Drosophila melanogaster]	gi|24584710	224397	0.998	2	2	9	4.21e-05	0.534	FALSE	S_F1.4840.4840.3.dta	VDDLAAELDASQK	K	E	0.95	34	36.8	0	2		459.028	1374.06	1374.68	3	0.393	285.8	1459	1471	FALSE	gi|24584704,gi|24584700,gi|28574239,gi|24584706,gi|24584702,gi|24584712,gi|24584698
Myosin heavy chain CG17927-PB, isoform B [Drosophila melanogaster]	gi|24584710	224397	0.998	2	2	9	4.21e-05	0.534	FALSE	S_A12Dros.1304.1304.2.dta	SKYESDGVAR	R	S	0.95	34	36.2	0	2		556.225	1110.43	1111.54	2	-0.09672	-87.02	1372	1381	FALSE	gi|24584704,gi|24584700,gi|28574239,gi|24584706,gi|24584702,gi|24584712,gi|24584698
Myosin heavy chain CG17927-PJ, isoform J [Drosophila melanogaster]	gi|24584698	224394	0.998	2	2	3	1.4e-05	0.541	FALSE	S_A9Dros.1424.1424.3.dta	KADQEISGLKK	K	D	0.95	34	37	0	2		406.177	1215.51	1216.69	3	-0.174	-143	939	949	FALSE	gi|24584704,gi|24584700,gi|28574239,gi|24584706,gi|24584710,gi|24584702,gi|24584712
Myosin heavy chain CG17927-PJ, isoform J [Drosophila melanogaster]	gi|24584698	224394	0.998	2	2	3	1.4e-05	0.541	FALSE	S_F1.4840.4840.3.dta	VDDLAAELDASQK	K	E	0.95	34	36.8	0	2		459.028	1374.06	1374.68	3	0.393	285.8	1457	1469	FALSE	gi|24584704,gi|24584700,gi|28574239,gi|24584706,gi|24584710,gi|24584702,gi|24584712
Myosin heavy chain CG17927-PJ, isoform J [Drosophila melanogaster]	gi|24584698	224394	0.998	2	2	3	1.4e-05	0.541	FALSE	S_A12Dros.1304.1304.2.dta	SKYESDGVAR	R	S	0.95	34	36.2	0	2		556.225	1110.43	1111.54	2	-0.09672	-87.02	1370	1379	FALSE	gi|24584704,gi|24584700,gi|28574239,gi|24584706,gi|24584710,gi|24584702,gi|24584712
CDP diglyceride synthetase CG7962-PA [Drosophila melanogaster]	gi|17864222	51496	0.998	2	3	8	3.74e-05	0.0694	TRUE	S_E910.2939.2939.3.dta	KGEDEPLEDTAISGSDAANKR	R	N	0.95	34	36.2	1.62	2		735.105	2202.29	2203.05	3	0.2516	114.2	8	28	TRUE
Actin 5C CG4027-PB, isoform B [Drosophila melanogaster]	gi|17530805,gi|24639997,gi|62473515,gi|62473526	41804.7	0.998	2	3	13	6.08e-05	0.364	TRUE	S_F9.2577.2577.3.dta	QEYDESGPSIVHR	K	K	0.95	34	36.6	0	2		506.213	1515.62	1516.7	3	-0.07859	-51.82	361	373	TRUE
Myosin heavy chain CG17927-PK, isoform K [Drosophila melanogaster]	gi|24584712	221394	0.993	1	1	1	4.68e-06	0.52	FALSE	S_A9Dros.1424.1424.3.dta	KADQEISGLKK	K	D	0.95	34	37	0	2		406.177	1215.51	1216.69	3	-0.174	-143	941	951	FALSE	gi|24584704,gi|24584700,gi|28574239,gi|24584706,gi|24584710,gi|24584702,gi|24584698
Myosin heavy chain CG17927-PK, isoform K [Drosophila melanogaster]	gi|24584712	221394	0.993	1	1	1	4.68e-06	0.52	FALSE	S_F1.4840.4840.3.dta	VDDLAAELDASQK	K	E	0.95	34	36.8	0	2		459.028	1374.06	1374.68	3	0.393	285.8	1459	1471	FALSE	gi|24584704,gi|24584700,gi|28574239,gi|24584706,gi|24584710,gi|24584702,gi|24584698
Myosin heavy chain CG17927-PK, isoform K [Drosophila melanogaster]	gi|24584712	221394	0.993	1	1	1	4.68e-06	0.52	FALSE	S_A12Dros.1304.1304.2.dta	SKYESDGVAR	R	S	0.95	34	36.2	0	2		556.225	1110.43	1111.54	2	-0.09672	-87.02	1372	1381	FALSE	gi|24584704,gi|24584700,gi|28574239,gi|24584706,gi|24584710,gi|24584702,gi|24584698
CG6126 CG6126-PA [Drosophila melanogaster]	gi|21355657	60855.5	0.5	1	1	1	4.68e-06	0.018	TRUE	A10.4932.4932.2.dta	SSAGLSDLFR	K	T	0.95	34	35.9	0	2		527.453	1052.89	1052.54	2	1.361	1291	319	328	TRUE
CG3792 CG3792-PA [Drosophila melanogaster]	gi|24581793	27528.8	0.5	1	1	1	4.68e-06	0.0397	TRUE	S_F6.4512.4512.2.dta	QGALFLmSEK	R	C	0.95	34	36.1	0	2	m7: Oxidation (+15.99)	570.303	1138.59	1139.58	2	0.02147	18.84	7	16	TRUE
Myosin heavy chain CG17927-PD, isoform D [Drosophila melanogaster]	gi|24584702,gi|24584706	224480	0.994	1	1	38	0.000178	0.544	FALSE	S_A9Dros.1424.1424.3.dta	KADQEISGLKK	K	D	0.95	34	37	0	2		406.177	1215.51	1216.69	3	-0.174	-143	941	951	FALSE	gi|24584704,gi|24584700,gi|28574239,gi|24584710,gi|24584712,gi|24584698
Myosin heavy chain CG17927-PD, isoform D [Drosophila melanogaster]	gi|24584702,gi|24584706	224480	0.994	1	1	38	0.000178	0.544	FALSE	S_F1.4840.4840.3.dta	VDDLAAELDASQK	K	E	0.95	34	36.8	0	2		459.028	1374.06	1374.68	3	0.393	285.8	1459	1471	FALSE	gi|24584704,gi|24584700,gi|28574239,gi|24584710,gi|24584712,gi|24584698
Myosin heavy chain CG17927-PD, isoform D [Drosophila melanogaster]	gi|24584702,gi|24584706	224480	0.994	1	1	38	0.000178	0.544	FALSE	S_A12Dros.1304.1304.2.dta	SKYESDGVAR	R	S	0.95	34	36.2	0	2		556.225	1110.43	1111.54	2	-0.09672	-87.02	1372	1381	FALSE	gi|24584704,gi|24584700,gi|28574239,gi|24584710,gi|24584712,gi|24584698
Myosin heavy chain CG17927-PA, isoform A [Drosophila melanogaster]	gi|24584704,gi|28574239	224597	1	128	186	2330	0.0109	0.549	TRUE	A6.1134.1134.3.dta	QLQHTLNEVQSK	K	L	0.95	34.1	36.6	0	2		476.045	1425.11	1424.75	3	1.369	959.8	1250	1261	TRUE	gi|24584700,gi|24584706,gi|24584710,gi|24584702,gi|24584712,gi|24584698
Myosin heavy chain CG17927-PA, isoform A [Drosophila melanogaster]	gi|24584704,gi|28574239	224597	1	128	186	2330	0.0109	0.549	TRUE	A3.1547.1547.2.dta	GALQDYQER	K	N	0.95	34.1	36.2	0	2		540.698	1079.38	1079.51	2	0.8762	811	895	903	TRUE	gi|24584700,gi|24584706,gi|24584710,gi|24584702,gi|24584712,gi|24584698
Myosin heavy chain CG17927-PA, isoform A [Drosophila melanogaster]	gi|24584704,gi|28574239	224597	1	128	186	2330	0.0109	0.549	TRUE	A10.4990.4990.2.dta	DLLQQVNPPK	K	Y	0.95	34.1	36.1	0	2		576.786	1151.56	1151.64	2	0.921	799.1	75	84	TRUE	gi|24584700,gi|24584706,gi|24584710,gi|24584702,gi|24584712
bent CG32019-PA, isoform A [Drosophila melanogaster]	gi|28558739,gi|45552153	1.00129e+06	1	118	128	787	0.00368	0.191	TRUE	S_G1.4822.4822.3.dta	AVDLTDWDKDHADLK	K	W	0.95	34.1	36.4	0	2		581.471	1741.39	1741.84	3	0.5574	319.9	2218	2232	TRUE
bent CG32019-PA, isoform A [Drosophila melanogaster]	gi|28558739,gi|45552153	1.00129e+06	1	118	128	787	0.00368	0.191	TRUE	S_F912.8102.8102.3.dta	AENQYGLSDPLDIIEPIVAK	R	H	0.95	34.1	36.3	2.21	2		729.265	2184.77	2185.14	3	0.6399	292.8	7035	7054	TRUE
sallimus CG1915-PC, isoform C [Drosophila melanogaster]	gi|161080703	2.06604e+06	1	83	86	363	0.0017	0.0614	TRUE	S_E6.6481.6481.2.dta	SDALTQmEATIKK	R	Y	0.95	34.1	36.4	0	2	m7: Oxidation (+15.99)	727.124	1452.23	1451.74	2	1.499	1031	3921	3933	TRUE
sallimus CG1915-PC, isoform C [Drosophila melanogaster]	gi|161080703	2.06604e+06	1	83	86	363	0.0017	0.0614	TRUE	A12.2064.2064.2.dta	EELVTEDEQPNPPK	R	F	0.95	34.1	36.4	0	2		813.167	1624.32	1624.77	2	0.5558	341.9	3664	3677	TRUE
CG1516 CG1516-PE, isoform E [Drosophila melanogaster]	gi|19921944,gi|24652210,gi|24652212,gi|24652214,gi|24652216,gi|24652218,gi|24652220,gi|24652222,gi|24652224	130848	1	36	39	469	0.00219	0.346	TRUE	S_A4Dros.1728.1728.2.dta	SVAVYSEQDK	K	M	0.95	34.1	35.9	0	2		563.597	1125.18	1125.54	2	0.6439	571.7	65	74	TRUE
Larval serum protein 1 gamma CG6821-PA [Drosophila melanogaster]	gi|17647601	93395.1	1	24	29	120	0.000561	0.31	TRUE	A7.3417.3417.2.dta	EFSWTAEDR	K	I	0.95	34.1	36.3	0	2		571.21	1140.4	1140.5	2	0.9155	802	627	635	TRUE
viking CG16858-PA [Drosophila melanogaster]	gi|17137252	193761	1	18	19	190	0.000889	0.103	TRUE	S_G3.4023.4023.3.dta	GPQGESGVVGLDGRNGQIGDQGPR	K	G	0.95	34.1	36	3.34	2		784.378	2350.11	2350.15	3	0.9668	411.2	1130	1153	TRUE
aralar1 CG2139-PC, isoform C [Drosophila melanogaster]	gi|24651387,gi|24651389,gi|24651391,gi|45552009	76738	1	14	15	61	0.000285	0.226	TRUE	A9.4975.4975.2.dta	FGLYLPR	K	F	0.95	34.1	36.4	0	2		433.186	864.357	865.494	2	-0.1292	-149.3	673	679	TRUE
ATP synthase-gamma chain CG7610-PA, isoform A [Drosophila melanogaster]	gi|24651125,gi|24651127,gi|24651129	32854.5	1	14	17	98	0.000459	0.512	TRUE	S_E7.5593.5593.3.dta	AARPYGIGAQQFFEK	K	T	0.95	34.1	36.5	2.89	2		561.509	1681.5	1682.87	3	-0.3529	-209.7	66	80	TRUE
Myosin light chain 2 CG2184-PA, isoform A [Drosophila melanogaster]	gi|17933672	23697.5	1	11	15	196	0.000917	0.518	TRUE	A4.2977.2977.2.dta	TFDNDGLIDGDK	K	F	0.95	34.1	36.5	0	2		655.048	1308.08	1309.59	2	-0.5029	-384.2	158	169	TRUE
CG6782 CG6782-PE, isoform E [Drosophila melanogaster]	gi|78706744,gi|78706746,gi|78706748,gi|78706750	34076.3	1	10	10	28	0.000131	0.259	TRUE	S_F8.6053.6053.2.dta	GFLGLYR	R	G	0.95	34.1	35.2	0	2		413.168	824.32	825.462	2	-0.1349	-163.5	87	93	TRUE
Succinate dehydrogenase B CG3283-PA [Drosophila melanogaster]	gi|17137106	33724	1	9	9	39	0.000182	0.273	TRUE	S_F8.4938.4938.3.dta	LKDPFSVYR	K	C	0.95	34.1	35.9	0	2		375.515	1123.52	1124.61	3	-0.0819	-72.83	243	251	TRUE
CG3560 CG3560-PA [Drosophila melanogaster]	gi|24642430	13550.9	1	6	7	35	0.000164	0.369	TRUE	S_A2Dros.3062.3062.2.dta	GPAVLSNLGR	K	W	0.95	34.1	35.8	0	2		492.277	982.539	983.564	2	-0.01742	-17.72	9	18	TRUE
CG2233 CG2233-PA [Drosophila melanogaster]	gi|18921139	46492.2	1	6	8	24	0.000112	0.14	TRUE	S_E9.5193.5193.2.dta	LLFDSVR	R	K	0.95	34.1	36.4	0	2		425.658	849.301	849.484	2	0.825	970.2	45	51	TRUE
Superoxide dismutase 2 (Mn) CG8905-PA [Drosophila melanogaster]	gi|17136812	24641.9	1	4	4	7	3.28e-05	0.18	TRUE	S_A5Dros.1730.1730.2.dta	SLEEFKK	K	E	0.95	34.1	35.8	0	2		440.771	879.527	880.478	2	0.05637	64.02	119	125	TRUE
Myosin heavy chain CG17927-PF, isoform F [Drosophila melanogaster]	gi|24584700	224516	0.998	2	2	20	9.36e-05	0.548	FALSE	A6.1134.1134.3.dta	QLQHTLNEVQSK	K	L	0.95	34.1	36.6	0	2		476.045	1425.11	1424.75	3	1.369	959.8	1250	1261	FALSE	gi|24584704,gi|28574239,gi|24584706,gi|24584710,gi|24584702,gi|24584712,gi|24584698
Myosin heavy chain CG17927-PF, isoform F [Drosophila melanogaster]	gi|24584700	224516	0.998	2	2	20	9.36e-05	0.548	FALSE	A3.1547.1547.2.dta	GALQDYQER	K	N	0.95	34.1	36.2	0	2		540.698	1079.38	1079.51	2	0.8762	811	895	903	FALSE	gi|24584704,gi|28574239,gi|24584706,gi|24584710,gi|24584702,gi|24584712,gi|24584698
Myosin heavy chain CG17927-PF, isoform F [Drosophila melanogaster]	gi|24584700	224516	0.998	2	2	20	9.36e-05	0.548	FALSE	A10.4990.4990.2.dta	DLLQQVNPPK	K	Y	0.95	34.1	36.1	0	2		576.786	1151.56	1151.64	2	0.921	799.1	75	84	FALSE	gi|24584704,gi|28574239,gi|24584706,gi|24584710,gi|24584702,gi|24584712
Myosin heavy chain CG17927-PB, isoform B [Drosophila melanogaster]	gi|24584710	224397	0.998	2	2	9	4.21e-05	0.534	FALSE	A6.1134.1134.3.dta	QLQHTLNEVQSK	K	L	0.95	34.1	36.6	0	2		476.045	1425.11	1424.75	3	1.369	959.8	1250	1261	FALSE	gi|24584704,gi|24584700,gi|28574239,gi|24584706,gi|24584702,gi|24584712,gi|24584698
Myosin heavy chain CG17927-PB, isoform B [Drosophila melanogaster]	gi|24584710	224397	0.998	2	2	9	4.21e-05	0.534	FALSE	A3.1547.1547.2.dta	GALQDYQER	K	N	0.95	34.1	36.2	0	2		540.698	1079.38	1079.51	2	0.8762	811	895	903	FALSE	gi|24584704,gi|24584700,gi|28574239,gi|24584706,gi|24584702,gi|24584712,gi|24584698
Myosin heavy chain CG17927-PB, isoform B [Drosophila melanogaster]	gi|24584710	224397	0.998	2	2	9	4.21e-05	0.534	FALSE	A10.4990.4990.2.dta	DLLQQVNPPK	K	Y	0.95	34.1	36.1	0	2		576.786	1151.56	1151.64	2	0.921	799.1	75	84	FALSE	gi|24584704,gi|24584700,gi|28574239,gi|24584706,gi|24584702,gi|24584712
Myosin heavy chain CG17927-PJ, isoform J [Drosophila melanogaster]	gi|24584698	224394	0.998	2	2	3	1.4e-05	0.541	FALSE	A6.1134.1134.3.dta	QLQHTLNEVQSK	K	L	0.95	34.1	36.6	0	2		476.045	1425.11	1424.75	3	1.369	959.8	1248	1259	FALSE	gi|24584704,gi|24584700,gi|28574239,gi|24584706,gi|24584710,gi|24584702,gi|24584712
Myosin heavy chain CG17927-PJ, isoform J [Drosophila melanogaster]	gi|24584698	224394	0.998	2	2	3	1.4e-05	0.541	FALSE	A3.1547.1547.2.dta	GALQDYQER	K	N	0.95	34.1	36.2	0	2		540.698	1079.38	1079.51	2	0.8762	811	893	901	FALSE	gi|24584704,gi|24584700,gi|28574239,gi|24584706,gi|24584710,gi|24584702,gi|24584712
Ccp84Ag CG2342-PA [Drosophila melanogaster]	gi|21358149	19436.1	0.998	2	2	5	2.34e-05	0.115	TRUE	A4.1439.1439.2.dta	AAVAAPVVR	R	A	0.95	34.1	35.4	0	2		427.728	853.441	853.526	2	0.9226	1080	124	132	TRUE
Myosin heavy chain CG17927-PK, isoform K [Drosophila melanogaster]	gi|24584712	221394	0.993	1	1	1	4.68e-06	0.52	FALSE	A6.1134.1134.3.dta	QLQHTLNEVQSK	K	L	0.95	34.1	36.6	0	2		476.045	1425.11	1424.75	3	1.369	959.8	1250	1261	FALSE	gi|24584704,gi|24584700,gi|28574239,gi|24584706,gi|24584710,gi|24584702,gi|24584698
Myosin heavy chain CG17927-PK, isoform K [Drosophila melanogaster]	gi|24584712	221394	0.993	1	1	1	4.68e-06	0.52	FALSE	A3.1547.1547.2.dta	GALQDYQER	K	N	0.95	34.1	36.2	0	2		540.698	1079.38	1079.51	2	0.8762	811	895	903	FALSE	gi|24584704,gi|24584700,gi|28574239,gi|24584706,gi|24584710,gi|24584702,gi|24584698
Myosin heavy chain CG17927-PK, isoform K [Drosophila melanogaster]	gi|24584712	221394	0.993	1	1	1	4.68e-06	0.52	FALSE	A10.4990.4990.2.dta	DLLQQVNPPK	K	Y	0.95	34.1	36.1	0	2		576.786	1151.56	1151.64	2	0.921	799.1	75	84	FALSE	gi|24584704,gi|24584700,gi|28574239,gi|24584706,gi|24584710,gi|24584702
Neb-cGP CG15304-PA [Drosophila melanogaster]	gi|21358399	5069.4	0.5	1	1	4	1.87e-05	0.208	TRUE	A2.2506.2506.2.dta	IFNGTTMSGR	K	A	0.95	34.1	36.4	0	2		542.685	1083.35	1083.53	2	0.8369	771.8	14	23	TRUE
Myosin heavy chain CG17927-PD, isoform D [Drosophila melanogaster]	gi|24584702,gi|24584706	224480	0.994	1	1	38	0.000178	0.544	FALSE	A6.1134.1134.3.dta	QLQHTLNEVQSK	K	L	0.95	34.1	36.6	0	2		476.045	1425.11	1424.75	3	1.369	959.8	1250	1261	FALSE	gi|24584704,gi|24584700,gi|28574239,gi|24584710,gi|24584712,gi|24584698
Myosin heavy chain CG17927-PD, isoform D [Drosophila melanogaster]	gi|24584702,gi|24584706	224480	0.994	1	1	38	0.000178	0.544	FALSE	A3.1547.1547.2.dta	GALQDYQER	K	N	0.95	34.1	36.2	0	2		540.698	1079.38	1079.51	2	0.8762	811	895	903	FALSE	gi|24584704,gi|24584700,gi|28574239,gi|24584710,gi|24584712,gi|24584698
Myosin heavy chain CG17927-PD, isoform D [Drosophila melanogaster]	gi|24584702,gi|24584706	224480	0.994	1	1	38	0.000178	0.544	FALSE	A10.4990.4990.2.dta	DLLQQVNPPK	K	Y	0.95	34.1	36.1	0	2		576.786	1151.56	1151.64	2	0.921	799.1	75	84	FALSE	gi|24584704,gi|24584700,gi|28574239,gi|24584710,gi|24584712
Myosin heavy chain CG17927-PA, isoform A [Drosophila melanogaster]	gi|24584704,gi|28574239	224597	1	128	186	2330	0.0109	0.549	TRUE	S_F912.4799.4799.2.dta	NLEHDLDNLR	R	E	0.95	34.2	36.2	0	2		619.331	1236.65	1238.61	2	-0.9584	-774.4	1334	1343	TRUE	gi|24584700,gi|24584706,gi|24584710,gi|24584702,gi|24584712,gi|24584698
Myosin heavy chain CG17927-PA, isoform A [Drosophila melanogaster]	gi|24584704,gi|28574239	224597	1	128	186	2330	0.0109	0.549	TRUE	A11.2348.2348.2.dta	ELSFQSEEDR	K	K	0.95	34.2	36	0	2		620.156	1238.3	1239.55	2	-0.2457	-198.3	1848	1857	TRUE	gi|24584700,gi|24584706,gi|24584710,gi|24584702,gi|24584712,gi|24584698
Myosin heavy chain CG17927-PA, isoform A [Drosophila melanogaster]	gi|24584704,gi|28574239	224597	1	128	186	2330	0.0109	0.549	TRUE	S_E4.4424.4425.2.dta	EQLNSLmTTLR	K	S	0.95	34.2	36.5	0	2	m7: Oxidation (+15.99)	661.96	1321.9	1321.68	2	1.234	932.8	654	664	TRUE	gi|24584700,gi|24584706,gi|24584710,gi|24584702,gi|24584712,gi|24584698
Myosin heavy chain CG17927-PA, isoform A [Drosophila melanogaster]	gi|24584704,gi|28574239	224597	1	128	186	2330	0.0109	0.549	TRUE	S_E911.5162.5162.3.dta	QAEQELADAHEQLNEVSAQNASISAAK	R	R	0.95	34.2	35.6	0	2		951.641	2851.9	2852.37	3	0.5403	189.4	1700	1726	TRUE	gi|24584700,gi|24584706,gi|24584710,gi|24584702,gi|24584712,gi|24584698
terribly reduced optic lobes CG33950-PF, isoform F [Drosophila melanogaster]	gi|78706474	513388	1	89	107	871	0.00408	0.237	TRUE	S_A10Dros.1233.1233.2.dta	RPLPNNAR	R	T	0.95	34.2	35.9	0	2		469.313	936.611	937.533	2	0.08526	90.93	3676	3683	TRUE	gi|161077537
terribly reduced optic lobes CG33950-PF, isoform F [Drosophila melanogaster]	gi|78706474	513388	1	89	107	871	0.00408	0.237	TRUE	A10.1737.1737.2.dta	DQVTSTFGR	R	S	0.95	34.2	36	0	2		506.178	1010.34	1010.49	2	0.8577	848.1	2237	2245	TRUE	gi|161077537
CG32702 CG32702-PA [Drosophila melanogaster]	gi|24640838	411066	1	55	57	276	0.00129	0.175	TRUE	S_E912.4603.4603.2.dta	IVDTLmLcGmEAK	K	H	0.95	34.2	36.3	0	2	m6: Oxidation (+15.99), c8: Carbamidomethyl (+57.02), m10: Oxidation (+15.99)	756.728	1511.44	1512.71	2	-0.2628	-173.8	2404	2416	TRUE
zormin CG33484-PD, isoform D [Drosophila melanogaster]	gi|116007762	411353	1	35	37	226	0.00106	0.131	TRUE	S_G1.2924.2924.3.dta	GSGLPASSDVQTVSQEHNTESSR	R	V	0.95	34.2	36	0	2		792.127	2373.36	2373.09	3	1.273	536	2004	2026	TRUE
Na pump alpha subunit CG5670-PA, isoform A [Drosophila melanogaster]	gi|24648576,gi|24648578,gi|24648580,gi|45553435,gi|45553437,gi|45553439,gi|45553441	115591	1	24	29	209	0.000978	0.306	TRUE	S_F911.2839.2839.3.dta	YQVSIHETEDTNDPR	K	Y	0.95	34.2	36.6	1.62	2		601.89	1802.65	1803.82	3	-0.1615	-89.53	506	520	TRUE
Larval serum protein 1 gamma CG6821-PA [Drosophila melanogaster]	gi|17647601	93395.1	1	24	29	120	0.000561	0.31	TRUE	S_E911.6098.6098.2.dta	DWETFVR	K	N	0.95	34.2	36.1	0	2		476.638	951.261	952.453	2	-0.1844	-193.7	117	123	TRUE
Unc-89 CG33519-PB, isoform B [Drosophila melanogaster]	gi|161077453,gi|161077455	469048	1	22	22	65	0.000304	0.0755	TRUE	S_A12Dros.2093.2093.2.dta	ISDQQQVFGNNAK	K	I	0.95	34.2	36.5	0	2		724.859	1447.7	1448.71	2	-0.003806	-2.627	2561	2573	TRUE
Cytochrome P450 reductase CG11567-PA, isoform A [Drosophila melanogaster]	gi|17137192	76331.1	1	18	20	177	0.000828	0.321	TRUE	S_F1.3883.3883.2.dta	GNmSEADAVQYIK	K	K	0.95	34.2	36.5	0	2	m3: Oxidation (+15.99)	721.259	1440.5	1441.66	2	-0.1527	-105.9	653	665	TRUE
Vinculin CG3299-PA [Drosophila melanogaster]	gi|17136646	106286	1	17	18	99	0.000463	0.223	TRUE	S_F912.4944.4944.2.dta	AEIQQLcDEVER	K	L	0.95	34.2	36.5	0	2	c7: Carbamidomethyl (+57.02)	745.304	1488.59	1489.7	2	-0.09619	-64.57	431	442	TRUE
Zeelin1 CG6803-PB, isoform B [Drosophila melanogaster]	gi|21357797	41650.6	1	13	14	71	0.000332	0.405	TRUE	S_F8.4560.4561.2.dta	YGLYLR	R	D	0.95	34.2	35.4	0	2		392.931	783.846	784.436	2	0.4177	532.2	129	134	TRUE
CG7145 CG7145-PA, isoform A [Drosophila melanogaster]	gi|24668413,gi|24668417,gi|24668425	63651.1	1	13	13	55	0.000257	0.279	TRUE	S_G2.7541.7541.2.dta	IGDVQDFSSFTSAVIDDK	K	A	0.95	34.2	36.3	0	2		972.79	1943.56	1943.92	2	0.6486	333.5	388	405	TRUE
CG7998 CG7998-PA [Drosophila melanogaster]	gi|24647881	35300.4	1	13	16	156	0.00073	0.366	TRUE	S_F5.4589.4589.2.dta	NGVQENLGLPK	K	L	0.95	34.2	36.4	0	2		585.118	1168.22	1168.63	2	0.5959	509.6	297	307	TRUE
CG7998 CG7998-PA [Drosophila melanogaster]	gi|24647881	35300.4	1	13	16	156	0.00073	0.366	TRUE	S_A7Dros.4234.4234.2.dta	TAGFIGADQLGDSLK	K	G	0.95	34.2	36.4	0	2		746.982	1491.95	1492.77	2	0.1904	127.5	77	91	TRUE
porin CG6647-PA, isoform A [Drosophila melanogaster]	gi|17136632,gi|19550069,gi|85724932	30532.8	1	12	17	129	0.000604	0.44	TRUE	S_E7.2236.2236.3.dta	TSSGIEFNTAGHSNQESGK	K	V	0.95	34.2	36.4	0	2		651.416	1951.22	1950.88	3	1.352	692.6	34	52	TRUE
CG10097 CG10097-PB, isoform B [Drosophila melanogaster]	gi|78706758	56986.7	1	11	14	80	0.000374	0.271	TRUE	S_A9Dros.2479.2479.2.dta	FPNTYTYTK	K	A	0.95	34.2	36.5	0	2		568.315	1134.61	1134.55	2	1.074	946	202	210	TRUE	gi|19920962
CG7920 CG7920-PA, isoform A [Drosophila melanogaster]	gi|21358615	51836.5	1	10	12	100	0.000468	0.262	TRUE	S_E911.3797.3797.2.dta	LIVAQINPK	K	M	0.95	34.2	35.9	0	2		498.227	994.438	995.625	2	-0.18	-180.8	189	197	TRUE
Heat shock protein cognate 5 CG8542-PA [Drosophila melanogaster]	gi|24653595	74049.3	1	9	9	38	0.000178	0.191	TRUE	A9.4471.4471.2.dta	NAVVTVPAYFNDSQR	K	Q	0.95	34.2	36.2	0	2		840.835	1679.65	1680.83	2	-0.1728	-102.8	188	202	TRUE
26-29kD-proteinase CG8947-PA [Drosophila melanogaster]	gi|20428641	62113.2	1	9	10	83	0.000388	0.157	TRUE	S_F8.3207.3207.2.dta	NNcGVmTmPTYVEm	K	-	0.95	34.2	36.5	0	2	c3: Carbamidomethyl (+57.02), m6: Oxidation (+15.99), m8: Oxidation (+15.99), m14: Oxidation (+15.99)	848.022	1694.03	1694.65	2	0.3822	225.5	536	549	TRUE
coracle CG11949-PA, isoform A [Drosophila melanogaster]	gi|24655527	184153	1	8	10	43	0.000201	0.073	TRUE	S_F910.2410.2410.2.dta	PAEIKPSAPAEPETPTK	M	S	0.95	34.2	36.5	0	2		882.208	1762.4	1762.92	2	0.4847	274.8	2	18	TRUE
Rtnl1 CG33113-PF, isoform F [Drosophila melanogaster]	gi|28574660	63921.1	1	8	8	56	0.000262	0.185	TRUE	S_F7.3108.3108.2.dta	VVPVAPVESTQPQPK	K	I	0.95	34.2	36.4	0	2		788.715	1575.41	1575.87	2	0.5479	347.6	371	385	TRUE
Mitochondrial phosphate carrier protein CG4994-PA, isoform A [Drosophila melanogaster]	gi|24664191,gi|24664195	38832.9	1	8	12	46	0.000215	0.32	TRUE	S_F9.4163.4163.2.dta	TVELLYK	R	Y	0.95	34.2	36.4	0	2		433.235	864.455	865.504	2	-0.04111	-47.5	238	244	TRUE
CG13091 CG13091-PA [Drosophila melanogaster]	gi|19920962	59459.3	1	8	8	37	0.000173	0.205	FALSE	S_A9Dros.2479.2479.2.dta	FPNTYTYTK	K	A	0.95	34.2	36.5	0	2		568.315	1134.61	1134.55	2	1.074	946	202	210	FALSE	gi|78706758
CG4769 CG4769-PA [Drosophila melanogaster]	gi|24658292	33747	1	8	10	37	0.000173	0.287	TRUE	S_E7.2092.2092.2.dta	NLVGVTHTEAEAK	R	A	0.95	34.2	36.4	0	2		685.275	1368.53	1368.71	2	0.8293	605.5	115	127	TRUE
Ribosomal protein L5 CG17489-PA, isoform A [Drosophila melanogaster]	gi|116007382,gi|116007384,gi|116007388	34019.5	1	7	11	33	0.000154	0.224	TRUE	A7.1801.1801.3.dta	VVcAAYSHELPK	R	Y	0.95	34.2	36.8	0	2	c3: Carbamidomethyl (+57.02)	458.935	1373.78	1373.69	3	1.1	800	74	85	TRUE
Multiple inositol polyphosphate phosphatase 1 CG4123-PA, isoform A [Drosophila melanogaster]	gi|24665368,gi|24665372	53554.9	1	5	6	20	9.36e-05	0.128	TRUE	S_F910.5736.5736.3.dta	TKPETDALcQTDLIAIK	R	L	0.95	34.2	36.3	0	2	c9: Carbamidomethyl (+57.02)	639.64	1915.9	1917	3	-0.09716	-50.69	99	115	TRUE
flightin CG7445-PA [Drosophila melanogaster]	gi|17737667	20638.2	1	4	4	10	4.68e-05	0.346	TRUE	A5.1232.1232.2.dta	APPPPPEDDGYR	K	K	0.95	34.2	36.3	0	2		655.834	1309.65	1310.6	2	0.05766	43.99	65	76	TRUE
lethal (1) G0230 CG2968-PA [Drosophila melanogaster]	gi|18858089	16709.7	1	4	5	22	0.000103	0.197	TRUE	A3.3342.3342.2.dta	TFYDAAVVR	K	Q	0.95	34.2	35.9	0	2		520.911	1039.81	1041.54	2	-0.7232	-694.9	37	45	TRUE
CG6579 CG6579-PA [Drosophila melanogaster]	gi|24583867	20352.5	1	3	4	12	5.61e-05	0.222	TRUE	S_A3Dros.1246.1246.3.dta	DNEcTVTHSR	K	Q	0.95	34.2	37.1	0	2	c4: Carbamidomethyl (+57.02)	406.808	1217.4	1218.52	3	-0.1098	-90.09	137	146	TRUE
Myosin heavy chain CG17927-PF, isoform F [Drosophila melanogaster]	gi|24584700	224516	0.998	2	2	20	9.36e-05	0.548	FALSE	S_F912.4799.4799.2.dta	NLEHDLDNLR	R	E	0.95	34.2	36.2	0	2		619.331	1236.65	1238.61	2	-0.9584	-774.4	1334	1343	FALSE	gi|24584704,gi|28574239,gi|24584706,gi|24584710,gi|24584702,gi|24584712,gi|24584698
Myosin heavy chain CG17927-PF, isoform F [Drosophila melanogaster]	gi|24584700	224516	0.998	2	2	20	9.36e-05	0.548	FALSE	A11.2348.2348.2.dta	ELSFQSEEDR	K	K	0.95	34.2	36	0	2		620.156	1238.3	1239.55	2	-0.2457	-198.3	1848	1857	FALSE	gi|24584704,gi|28574239,gi|24584706,gi|24584710,gi|24584702,gi|24584712,gi|24584698
Myosin heavy chain CG17927-PF, isoform F [Drosophila melanogaster]	gi|24584700	224516	0.998	2	2	20	9.36e-05	0.548	FALSE	S_E4.4424.4425.2.dta	EQLNSLmTTLR	K	S	0.95	34.2	36.5	0	2	m7: Oxidation (+15.99)	661.96	1321.9	1321.68	2	1.234	932.8	654	664	FALSE	gi|24584704,gi|28574239,gi|24584706,gi|24584710,gi|24584702,gi|24584712,gi|24584698
Myosin heavy chain CG17927-PF, isoform F [Drosophila melanogaster]	gi|24584700	224516	0.998	2	2	20	9.36e-05	0.548	FALSE	S_E911.5162.5162.3.dta	QAEQELADAHEQLNEVSAQNASISAAK	R	R	0.95	34.2	35.6	0	2		951.641	2851.9	2852.37	3	0.5403	189.4	1700	1726	FALSE	gi|24584704,gi|28574239,gi|24584706,gi|24584710,gi|24584702,gi|24584712,gi|24584698
Myosin heavy chain CG17927-PB, isoform B [Drosophila melanogaster]	gi|24584710	224397	0.998	2	2	9	4.21e-05	0.534	FALSE	S_F912.4799.4799.2.dta	NLEHDLDNLR	R	E	0.95	34.2	36.2	0	2		619.331	1236.65	1238.61	2	-0.9584	-774.4	1334	1343	FALSE	gi|24584704,gi|24584700,gi|28574239,gi|24584706,gi|24584702,gi|24584712,gi|24584698
Myosin heavy chain CG17927-PB, isoform B [Drosophila melanogaster]	gi|24584710	224397	0.998	2	2	9	4.21e-05	0.534	FALSE	A11.2348.2348.2.dta	ELSFQSEEDR	K	K	0.95	34.2	36	0	2		620.156	1238.3	1239.55	2	-0.2457	-198.3	1848	1857	FALSE	gi|24584704,gi|24584700,gi|28574239,gi|24584706,gi|24584702,gi|24584712,gi|24584698
Myosin heavy chain CG17927-PB, isoform B [Drosophila melanogaster]	gi|24584710	224397	0.998	2	2	9	4.21e-05	0.534	FALSE	S_E4.4424.4425.2.dta	EQLNSLmTTLR	K	S	0.95	34.2	36.5	0	2	m7: Oxidation (+15.99)	661.96	1321.9	1321.68	2	1.234	932.8	654	664	FALSE	gi|24584704,gi|24584700,gi|28574239,gi|24584706,gi|24584702,gi|24584712,gi|24584698
Myosin heavy chain CG17927-PB, isoform B [Drosophila melanogaster]	gi|24584710	224397	0.998	2	2	9	4.21e-05	0.534	FALSE	S_E911.5162.5162.3.dta	QAEQELADAHEQLNEVSAQNASISAAK	R	R	0.95	34.2	35.6	0	2		951.641	2851.9	2852.37	3	0.5403	189.4	1700	1726	FALSE	gi|24584704,gi|24584700,gi|28574239,gi|24584706,gi|24584702,gi|24584712,gi|24584698
Myosin heavy chain CG17927-PJ, isoform J [Drosophila melanogaster]	gi|24584698	224394	0.998	2	2	3	1.4e-05	0.541	FALSE	S_F912.4799.4799.2.dta	NLEHDLDNLR	R	E	0.95	34.2	36.2	0	2		619.331	1236.65	1238.61	2	-0.9584	-774.4	1332	1341	FALSE	gi|24584704,gi|24584700,gi|28574239,gi|24584706,gi|24584710,gi|24584702,gi|24584712
Myosin heavy chain CG17927-PJ, isoform J [Drosophila melanogaster]	gi|24584698	224394	0.998	2	2	3	1.4e-05	0.541	FALSE	A11.2348.2348.2.dta	ELSFQSEEDR	K	K	0.95	34.2	36	0	2		620.156	1238.3	1239.55	2	-0.2457	-198.3	1846	1855	FALSE	gi|24584704,gi|24584700,gi|28574239,gi|24584706,gi|24584710,gi|24584702,gi|24584712
Myosin heavy chain CG17927-PJ, isoform J [Drosophila melanogaster]	gi|24584698	224394	0.998	2	2	3	1.4e-05	0.541	FALSE	S_E4.4424.4425.2.dta	EQLNSLmTTLR	K	S	0.95	34.2	36.5	0	2	m7: Oxidation (+15.99)	661.96	1321.9	1321.68	2	1.234	932.8	652	662	FALSE	gi|24584704,gi|24584700,gi|28574239,gi|24584706,gi|24584710,gi|24584702,gi|24584712
Myosin heavy chain CG17927-PJ, isoform J [Drosophila melanogaster]	gi|24584698	224394	0.998	2	2	3	1.4e-05	0.541	FALSE	S_E911.5162.5162.3.dta	QAEQELADAHEQLNEVSAQNASISAAK	R	R	0.95	34.2	35.6	0	2		951.641	2851.9	2852.37	3	0.5403	189.4	1698	1724	FALSE	gi|24584704,gi|24584700,gi|28574239,gi|24584706,gi|24584710,gi|24584702,gi|24584712
terribly reduced optic lobes CG33950-PG, isoform G [Drosophila melanogaster]	gi|161077537	459070	0.5	1	1	4	1.87e-05	0.256	FALSE	S_A10Dros.1233.1233.2.dta	RPLPNNAR	R	T	0.95	34.2	35.9	0	2		469.313	936.611	937.533	2	0.08526	90.93	3203	3210	FALSE	gi|78706474
terribly reduced optic lobes CG33950-PG, isoform G [Drosophila melanogaster]	gi|161077537	459070	0.5	1	1	4	1.87e-05	0.256	FALSE	A10.1737.1737.2.dta	DQVTSTFGR	R	S	0.95	34.2	36	0	2		506.178	1010.34	1010.49	2	0.8577	848.1	1764	1772	FALSE	gi|78706474
Myosin heavy chain CG17927-PK, isoform K [Drosophila melanogaster]	gi|24584712	221394	0.993	1	1	1	4.68e-06	0.52	FALSE	S_F912.4799.4799.2.dta	NLEHDLDNLR	R	E	0.95	34.2	36.2	0	2		619.331	1236.65	1238.61	2	-0.9584	-774.4	1334	1343	FALSE	gi|24584704,gi|24584700,gi|28574239,gi|24584706,gi|24584710,gi|24584702,gi|24584698
Myosin heavy chain CG17927-PK, isoform K [Drosophila melanogaster]	gi|24584712	221394	0.993	1	1	1	4.68e-06	0.52	FALSE	A11.2348.2348.2.dta	ELSFQSEEDR	K	K	0.95	34.2	36	0	2		620.156	1238.3	1239.55	2	-0.2457	-198.3	1848	1857	FALSE	gi|24584704,gi|24584700,gi|28574239,gi|24584706,gi|24584710,gi|24584702,gi|24584698
Myosin heavy chain CG17927-PK, isoform K [Drosophila melanogaster]	gi|24584712	221394	0.993	1	1	1	4.68e-06	0.52	FALSE	S_E4.4424.4425.2.dta	EQLNSLmTTLR	K	S	0.95	34.2	36.5	0	2	m7: Oxidation (+15.99)	661.96	1321.9	1321.68	2	1.234	932.8	654	664	FALSE	gi|24584704,gi|24584700,gi|28574239,gi|24584706,gi|24584710,gi|24584702,gi|24584698
Myosin heavy chain CG17927-PK, isoform K [Drosophila melanogaster]	gi|24584712	221394	0.993	1	1	1	4.68e-06	0.52	FALSE	S_E911.5162.5162.3.dta	QAEQELADAHEQLNEVSAQNASISAAK	R	R	0.95	34.2	35.6	0	2		951.641	2851.9	2852.37	3	0.5403	189.4	1700	1726	FALSE	gi|24584704,gi|24584700,gi|28574239,gi|24584706,gi|24584710,gi|24584702,gi|24584698
Ribosomal protein S11 CG8857-PA, isoform A [Drosophila melanogaster]	gi|20129901,gi|24652922	18087.6	1	1	1	5	2.34e-05	0.0645	TRUE	A4.2236.2236.2.dta	EAIDGTYIDK	R	K	0.95	34.2	35.8	0	2		563.174	1124.33	1124.55	2	0.7919	703.7	46	55	TRUE
Myosin heavy chain CG17927-PD, isoform D [Drosophila melanogaster]	gi|24584702,gi|24584706	224480	0.994	1	1	38	0.000178	0.544	FALSE	S_F912.4799.4799.2.dta	NLEHDLDNLR	R	E	0.95	34.2	36.2	0	2		619.331	1236.65	1238.61	2	-0.9584	-774.4	1334	1343	FALSE	gi|24584704,gi|24584700,gi|28574239,gi|24584710,gi|24584712,gi|24584698
Myosin heavy chain CG17927-PD, isoform D [Drosophila melanogaster]	gi|24584702,gi|24584706	224480	0.994	1	1	38	0.000178	0.544	FALSE	A11.2348.2348.2.dta	ELSFQSEEDR	K	K	0.95	34.2	36	0	2		620.156	1238.3	1239.55	2	-0.2457	-198.3	1848	1857	FALSE	gi|24584704,gi|24584700,gi|28574239,gi|24584710,gi|24584712,gi|24584698
Myosin heavy chain CG17927-PD, isoform D [Drosophila melanogaster]	gi|24584702,gi|24584706	224480	0.994	1	1	38	0.000178	0.544	FALSE	S_E4.4424.4425.2.dta	EQLNSLmTTLR	K	S	0.95	34.2	36.5	0	2	m7: Oxidation (+15.99)	661.96	1321.9	1321.68	2	1.234	932.8	654	664	FALSE	gi|24584704,gi|24584700,gi|28574239,gi|24584710,gi|24584712,gi|24584698
Myosin heavy chain CG17927-PD, isoform D [Drosophila melanogaster]	gi|24584702,gi|24584706	224480	0.994	1	1	38	0.000178	0.544	FALSE	S_E911.5162.5162.3.dta	QAEQELADAHEQLNEVSAQNASISAAK	R	R	0.95	34.2	35.6	0	2		951.641	2851.9	2852.37	3	0.5403	189.4	1700	1726	FALSE	gi|24584704,gi|24584700,gi|28574239,gi|24584710,gi|24584712,gi|24584698
terribly reduced optic lobes CG33950-PF, isoform F [Drosophila melanogaster]	gi|78706474	513388	1	89	107	871	0.00408	0.237	TRUE	S_F1.4632.4632.3.dta	cPDMRPQDSGAYScEIINTR	R	G	0.95	34.3	36.2	2.62	2	c1: Carbamidomethyl (+57.02), c14: Carbamidomethyl (+57.02)	790.995	2369.96	2370.03	3	0.9416	397.1	1795	1814	TRUE	gi|161077537
sallimus CG1915-PC, isoform C [Drosophila melanogaster]	gi|161080703	2.06604e+06	1	83	86	363	0.0017	0.0614	TRUE	A9.1946.1946.2.dta	ATNQVGEAVSTSSLK	K	I	0.95	34.3	36.5	0	2		746.058	1490.1	1491.77	2	-0.6568	-440.5	2699	2713	TRUE
sallimus CG1915-PC, isoform C [Drosophila melanogaster]	gi|161080703	2.06604e+06	1	83	86	363	0.0017	0.0614	TRUE	S_F912.7709.7709.2.dta	LLPVSAVESIDSTFK	R	V	0.95	34.3	36.4	0	2		804.174	1606.33	1605.87	2	1.466	912.3	8915	8929	TRUE
Muscle-specific protein 300 CG33715-PD, isoform D [Drosophila melanogaster]	gi|161076705	1.40526e+06	1	45	45	109	0.00051	0.0478	TRUE	S_A9Dros.3856.3856.2.dta	DLEEIEQVFR	K	R	0.95	34.3	36.6	0	2		639.819	1277.62	1277.64	2	0.9928	776.4	7880	7889	TRUE
Laminin A CG10236-PA [Drosophila melanogaster]	gi|17136292	411103	1	44	48	274	0.00128	0.16	TRUE	S_F9.6127.6127.2.dta	TNAPLEADLELPK	R	L	0.95	34.3	36.7	0	2		706.207	1410.4	1410.75	2	0.6584	466.5	2984	2996	TRUE
alpha Spectrin CG1977-PA [Drosophila melanogaster]	gi|17136504	278289	1	40	44	127	0.000594	0.207	TRUE	S_E912.5868.5868.2.dta	EcVVALYDYTEK	K	S	0.95	34.3	36.5	0	2	c2: Carbamidomethyl (+57.02)	745.162	1488.31	1489.69	2	-0.3719	-249.7	973	984	TRUE
bellwether CG3612-PA [Drosophila melanogaster]	gi|24658560	59405.3	1	27	35	476	0.00223	0.411	TRUE	S_A3Dros.2239.2239.2.dta	APGIIPR	K	V	0.95	34.3	35.4	0	2		362.344	722.673	723.452	2	0.2286	315.8	175	181	TRUE
Larval serum protein 1 gamma CG6821-PA [Drosophila melanogaster]	gi|17647601	93395.1	1	24	29	120	0.000561	0.31	TRUE	S_E911.4990.4990.2.dta	KFYMPVDYTR	K	D	0.95	34.3	36.6	0	2		660.248	1318.48	1319.65	2	-0.1572	-119.1	261	270	TRUE	gi|17136306
Unc-89 CG33519-PB, isoform B [Drosophila melanogaster]	gi|161077453,gi|161077455	469048	1	22	22	65	0.000304	0.0755	TRUE	S_F910.5819.5819.2.dta	ENDVGAYTcVATNEIGVTK	R	A	0.95	34.3	36.3	0	2	c9: Carbamidomethyl (+57.02)	1021.45	2040.88	2040.95	2	0.9283	454.6	2130	2148	TRUE
Cytochrome P450 reductase CG11567-PA, isoform A [Drosophila melanogaster]	gi|17137192	76331.1	1	18	20	177	0.000828	0.321	TRUE	S_F6.3291.3291.2.dta	LLEQPDVQPDR	R	I	0.95	34.3	36.3	0	2		655.666	1309.32	1309.68	2	0.649	495.3	251	261	TRUE
upheld CG7107-PF, isoform F [Drosophila melanogaster]	gi|62473664	47113.5	1	17	23	236	0.0011	0.405	TRUE	S_A8Dros.1205.1205.3.dta	SKEEDELKK	R	L	0.95	34.3	36.9	0	2		369.252	1104.73	1105.57	3	0.1671	151.1	62	70	TRUE	gi|62473654,gi|24641813
Heat shock protein cognate 3 CG4147-PA, isoform A [Drosophila melanogaster]	gi|24641402,gi|24641404,gi|24641406,gi|24641408	72244.5	1	17	21	185	0.000866	0.314	TRUE	S_A10Dros.3226.3226.3.dta	VTHAVVTVPAYFNDAQR	K	Q	0.95	34.3	36.3	2.96	2		630.495	1888.46	1887.97	3	1.499	793.2	165	181	TRUE
CG9090 CG9090-PA [Drosophila melanogaster]	gi|24656137	40535.9	1	13	16	119	0.000557	0.299	TRUE	S_A7Dros.3234.3234.2.dta	TLELLYK	R	Y	0.95	34.3	35.8	0	2		440.81	879.605	879.519	2	1.093	1241	251	257	TRUE
Heat shock protein cognate 4 CG4264-PA, isoform A [Drosophila melanogaster]	gi|17737967,gi|24647034,gi|24647036,gi|24647038,gi|28571719,gi|28571721	71115.5	1	13	15	105	0.000491	0.304	TRUE	S_F8.5691.5691.2.dta	FELSGIPPAPR	K	G	0.95	34.3	36.3	0	2		592.287	1182.56	1183.65	2	-0.08224	-69.49	459	469	TRUE
CG30084 CG30084-PF, isoform F [Drosophila melanogaster]	gi|161077121,gi|78709100	238039	1	12	13	100	0.000468	0.0702	TRUE	A5.2271.2271.2.dta	QNLEGQSFYNK	K	G	0.95	34.3	36.5	0	2		664.065	1326.11	1327.63	2	-0.5058	-381.1	2173	2183	TRUE	gi|78707228,gi|116007706
lethal (2) 01289 CG9432-PD, isoform D [Drosophila melanogaster]	gi|116007558,gi|24586058	212040	1	12	12	102	0.000477	0.0889	TRUE	S_F911.6711.6711.2.dta	GSQPVAPPEPEAVIEEVNAK	K	Q	0.95	34.3	36.3	0	2		1031.36	2060.7	2061.05	2	0.6547	317.5	36	55	TRUE	gi|24586060
Pyruvate kinase CG7070-PB, isoform B [Drosophila melanogaster]	gi|24648964,gi|28571814	55040.8	1	10	12	38	0.000178	0.232	TRUE	S_E6.5255.5255.2.dta	GDLGIEIPAEK	R	V	0.95	34.3	36.5	0	2		571.77	1141.52	1141.61	2	0.9209	806	277	287	TRUE
Pyruvate kinase CG7070-PB, isoform B [Drosophila melanogaster]	gi|24648964,gi|28571814	55040.8	1	10	12	38	0.000178	0.232	TRUE	S_F911.7725.7725.2.dta	GEYPLEcVLTMAK	K	T	0.95	34.3	36.3	0	2	c7: Carbamidomethyl (+57.02)	755.689	1509.36	1510.73	2	-0.3581	-237.1	350	362	TRUE
CG7430 CG7430-PA [Drosophila melanogaster]	gi|21358499	53066.3	1	9	11	34	0.000159	0.246	TRUE	A8.4332.4332.2.dta	FPFLANSR	K	A	0.95	34.3	36.1	0	2		476.747	951.479	951.505	2	0.9813	1030	416	423	TRUE
fau CG6544-PA, isoform A [Drosophila melanogaster]	gi|45550732	68623.5	1	9	11	44	0.000206	0.197	TRUE	S_E6.5309.5309.2.dta	SSYPIYSSYSVPR	K	R	0.95	34.3	36.5	0	2		753.891	1505.77	1505.73	2	1.046	694.2	38	50	TRUE
Ribosomal protein L5 CG17489-PA, isoform A [Drosophila melanogaster]	gi|116007382,gi|116007384,gi|116007388	34019.5	1	7	11	33	0.000154	0.224	TRUE	S_F9.2936.2936.3.dta	VVcAAYSHELPK	R	Y	0.95	34.3	36.8	0	2	c3: Carbamidomethyl (+57.02)	458.803	1373.38	1373.69	3	0.7038	512.1	74	85	TRUE
NADH:ubiquinone reductase 42kD subunit precursor CG6343-PA, isoform A [Drosophila melanogaster]	gi|17933656,gi|24648886	46880.9	1	7	7	28	0.000131	0.197	TRUE	S_E9.6156.6156.2.dta	IDFNQFEADIHNK	R	K	0.95	34.3	36.5	0	2		795.797	1589.58	1590.76	2	-0.1687	-106.1	307	319	TRUE
Esterase 6 CG6917-PA [Drosophila melanogaster]	gi|28574499	61109.3	1	7	8	29	0.000136	0.156	TRUE	S_F911.2892.2892.3.dta	DVEmRPDEQIISR	R	N	0.95	34.3	36.4	0	2	m4: Oxidation (+15.99)	535.603	1603.79	1603.78	3	1.018	634.5	480	492	TRUE
Limpet CG32171-PB, isoform B [Drosophila melanogaster]	gi|21356031,gi|24665611,gi|45553163,gi|45553165	63655.6	1	7	9	62	0.00029	0.172	TRUE	S_F9.3093.3093.3.dta	cTAcVKPITGIGGTR	R	F	0.95	34.3	36.5	1.44	2	c1: Carbamidomethyl (+57.02), c4: Carbamidomethyl (+57.02)	531.277	1590.81	1590.81	3	1.007	632.5	499	513	TRUE
Trehalose-6-phosphate synthase 1 CG4104-PA [Drosophila melanogaster]	gi|19920676	91118.1	1	7	7	24	0.000112	0.114	TRUE	S_E912.6928.6928.2.dta	LPSTDSVYTLLK	R	W	0.95	34.3	36.6	0	2		668.317	1334.62	1336.74	2	-1.11	-831	755	766	TRUE
Stretchin-Mlck CG18255-PA, isoform A [Drosophila melanogaster]	gi|24653966	1.03675e+06	1	7	7	9	4.21e-05	0.00831	TRUE	S_E912.6648.6648.2.dta	SQALLQEAQELEAAK	K	H	0.95	34.3	36.6	0	2		815.552	1629.09	1628.85	2	1.247	764.9	1141	1155	TRUE
PHGPx CG12013-PB, isoform B [Drosophila melanogaster]	gi|21356883,gi|24656767,gi|24656772,gi|24656777	18658.9	1	6	7	55	0.000257	0.391	TRUE	S_F7.2943.2943.2.dta	YAPTTDPmDIAK	R	D	0.95	34.3	36.3	0	2	m8: Oxidation (+15.99)	669.737	1337.46	1338.63	2	-0.1599	-119.5	152	163	TRUE
Hexosaminidase 2 CG1787-PA [Drosophila melanogaster]	gi|17933586	70645.9	1	6	7	29	0.000136	0.105	TRUE	S_E910.4530.4530.2.dta	YIETYLPK	R	E	0.95	34.3	36.3	0	2		514.311	1026.61	1026.55	2	1.063	1035	472	479	TRUE
string of pearls CG5920-PA [Drosophila melanogaster]	gi|17136734	28882.7	1	6	6	30	0.00014	0.251	TRUE	S_E3.3297.3297.2.dta	GTGIVSAPVPK	R	K	0.95	34.3	35.8	0	2		513.234	1024.45	1025.6	2	-0.14	-136.5	184	194	TRUE
Glutathione S transferase S1 CG8938-PA, isoform A [Drosophila melanogaster]	gi|24654347,gi|24654349,gi|24654351	27595.7	1	5	6	13	6.08e-05	0.193	TRUE	S_F8.6401.6401.2.dta	GVVDAVNALEPIK	R	A	0.95	34.3	36.3	0	2		662.77	1323.52	1324.75	2	-0.2151	-162.4	226	238	TRUE
beta galactosidase CG9092-PA [Drosophila melanogaster]	gi|24582088	75346.4	1	5	5	20	9.36e-05	0.0774	TRUE	S_E4.6210.6210.2.dta	GVAYVNGFNLGR	K	Y	0.95	34.3	36.3	0	2		634.26	1266.5	1266.66	2	0.8522	672.3	598	609	TRUE
Rab-protein 5 CG3664-PE, isoform E [Drosophila melanogaster]	gi|17736973,gi|24581101,gi|24581103,gi|24581105,gi|24581107,gi|24581110	23941.2	1	5	5	15	7.02e-05	0.301	TRUE	S_A5Dros.1190.1190.3.dta	SGGASGTGTAQRPNGTSQNK	R	S	0.95	34.3	36.4	0	2		626.441	1876.3	1875.89	3	1.418	755.1	7	26	TRUE
Larval serum protein 1 beta CG4178-PA [Drosophila melanogaster]	gi|17136306	95900.8	1	4	5	13	6.08e-05	0.0697	FALSE	S_E911.4990.4990.2.dta	KFYMPVDYTR	K	D	0.95	34.3	36.6	0	2		660.248	1318.48	1319.65	2	-0.1572	-119.1	267	276	FALSE	gi|17647601
CG4302 CG4302-PA [Drosophila melanogaster]	gi|19922680	60084.6	1	4	4	16	7.49e-05	0.103	TRUE	S_F911.5507.5507.2.dta	IGNVAmSAAEDLVR	R	E	0.95	34.3	36.5	0	2	m6: Oxidation (+15.99)	731.399	1460.78	1461.74	2	0.05346	36.57	208	221	TRUE
mitochondrial ribosomal protein S10 CG4247-PC, isoform C [Drosophila melanogaster]	gi|161078308,gi|24647027,gi|28571716	18741.9	1	3	3	4	1.87e-05	0.178	TRUE	S_F6.4653.4653.3.dta	TELQEIPEHLR	R	Q	0.95	34.3	36.2	0	2		455.739	1364.19	1364.72	3	0.4851	355.3	147	157	TRUE
lethal (2) 01289 CG9432-PA, isoform A [Drosophila melanogaster]	gi|24586060	97403.2	1	3	3	4	1.87e-05	0.144	FALSE	S_F911.6711.6711.2.dta	GSQPVAPPEPEAVIEEVNAK	K	Q	0.95	34.3	36.3	0	2		1031.36	2060.7	2061.05	2	0.6547	317.5	36	55	FALSE	gi|116007558,gi|24586058
Ribosomal protein L23A CG7977-PA [Drosophila melanogaster]	gi|24655502	29447	1	3	3	44	0.000206	0.101	TRUE	S_A4Dros.2470.2470.2.dta	YPLTTEAAMK	K	K	0.95	34.3	35.9	0	2		562.64	1123.26	1124.57	2	-0.2938	-261.3	200	209	TRUE
Ribosomal protein L23A CG7977-PA [Drosophila melanogaster]	gi|24655502	29447	1	3	3	44	0.000206	0.101	TRUE	A4.1632.1632.2.dta	YPLTTEAAmK	K	K	0.95	34.3	36.1	0	2	m9: Oxidation (+15.99)	570.737	1139.46	1140.56	2	-0.09473	-83.07	200	209	TRUE
CG5377 CG5377-PA [Drosophila melanogaster]	gi|24649021	31686.5	1	3	3	6	2.81e-05	0.112	TRUE	S_F8.5816.5816.2.dta	LVADFFNK	K	N	0.95	34.3	35.6	0	2		477.215	952.415	953.51	2	-0.08723	-91.49	269	276	TRUE
CG9306 CG9306-PA [Drosophila melanogaster]	gi|19921244	17366.9	1	2	2	17	7.95e-05	0.153	TRUE	A4.2648.2648.2.dta	NFANSAGGcAFER	R	E	0.95	34.3	36.7	0	2	c9: Carbamidomethyl (+57.02)	701.09	1400.16	1400.6	2	0.57	406.8	79	91	TRUE
upheld CG7107-PA, isoform A [Drosophila melanogaster]	gi|24641813	47430.7	0.998	2	2	17	7.95e-05	0.408	FALSE	S_A8Dros.1205.1205.3.dta	SKEEDELKK	R	L	0.95	34.3	36.9	0	2		369.252	1104.73	1105.57	3	0.1671	151.1	65	73	FALSE	gi|62473654,gi|62473664
Vap-33-1 CG5014-PB, isoform B [Drosophila melanogaster]	gi|18543325,gi|45554137,gi|45554146,gi|45554154	29460.1	0.999	2	2	15	7.02e-05	0.0855	TRUE	S_E7.4691.4691.2.dta	QVNEPYAPVLAEK	K	Q	0.95	34.3	36.7	0	2		729.287	1456.56	1457.76	2	-0.1974	-135.4	232	244	TRUE
Soluble NSF attachment protein CG6625-PA [Drosophila melanogaster]	gi|17737681	32983	0.997	2	2	2	9.36e-06	0.0856	TRUE	A6.2593.2593.2.dta	YAQQYPAFQDSR	K	E	0.95	34.3	36.6	0	2		737.211	1472.41	1473.68	2	-0.2628	-178.4	226	237	TRUE
upheld CG7107-PG, isoform G [Drosophila melanogaster]	gi|62473654	47331.6	0.986	1	1	1	4.68e-06	0.407	FALSE	S_A8Dros.1205.1205.3.dta	SKEEDELKK	R	L	0.95	34.3	36.9	0	2		369.252	1104.73	1105.57	3	0.1671	151.1	65	73	FALSE	gi|24641813,gi|62473664
terribly reduced optic lobes CG33950-PG, isoform G [Drosophila melanogaster]	gi|161077537	459070	0.5	1	1	4	1.87e-05	0.256	FALSE	S_F1.4632.4632.3.dta	cPDMRPQDSGAYScEIINTR	R	G	0.95	34.3	36.2	2.62	2	c1: Carbamidomethyl (+57.02), c14: Carbamidomethyl (+57.02)	790.995	2369.96	2370.03	3	0.9416	397.1	1322	1341	FALSE	gi|78706474
CG30084 CG30084-PG, isoform G [Drosophila melanogaster]	gi|116007706,gi|78707228	95990.3	0.5	1	1	1	4.68e-06	0.182	FALSE	A5.2271.2271.2.dta	QNLEGQSFYNK	K	G	0.95	34.3	36.5	0	2		664.065	1326.11	1327.63	2	-0.5058	-381.1	869	879	FALSE	gi|78709100,gi|161077121
VhaM9.7-2 CG7625-PA [Drosophila melanogaster]	gi|24668198	10045.3	0.5	1	1	3	1.4e-05	0.124	TRUE	S_F4.4915.4915.2.dta	LSmNEImIMAR	K	E	0.95	34.3	36.3	0	2	m3: Oxidation (+15.99), m7: Oxidation (+15.99)	670.462	1338.91	1340.64	2	-0.721	-538.1	65	75	TRUE
vasa intronic gene CG4170-PA, isoform A [Drosophila melanogaster]	gi|17737419,gi|24584391,gi|24584393,gi|24584395	52690.3	0.998	1	1	14	6.55e-05	0.0469	TRUE	S_F912.2819.2819.3.dta	EAIDDVNKNESETNVTNAEGGAK	K	A	0.95	34.3	36.1	1.96	2		802.623	2404.84	2405.11	3	0.7456	309.9	251	273	TRUE
jaguar CG5695-PB, isoform B [Drosophila melanogaster]	gi|24649614,gi|45549229,gi|62472788,gi|62472797,gi|62472805,gi|62472813	143287	0.5	1	1	2	9.36e-06	0.012	TRUE	S_E911.7515.7515.2.dta	ILDANPVLEAFGNAK	K	T	0.95	34.3	36.7	0	2		786.775	1571.53	1571.84	2	0.6982	444	182	196	TRUE
sallimus CG1915-PC, isoform C [Drosophila melanogaster]	gi|161080703	2.06604e+06	1	83	86	363	0.0017	0.0614	TRUE	S_E6.2848.2848.2.dta	YVNPEDSGTYTcR	K	A	0.95	34.4	36.6	0	2	c12: Carbamidomethyl (+57.02)	781.179	1560.34	1561.66	2	-0.3089	-197.8	1754	1766	TRUE
sallimus CG1915-PC, isoform C [Drosophila melanogaster]	gi|161080703	2.06604e+06	1	83	86	363	0.0017	0.0614	TRUE	S_F912.7682.7682.2.dta	VIEPEPIPGPEIIYLR	K	H	0.95	34.4	36.5	0	2		917.819	1833.62	1835.03	2	-0.4025	-219.4	582	597	TRUE
CG32702 CG32702-PA [Drosophila melanogaster]	gi|24640838	411066	1	55	57	276	0.00129	0.175	TRUE	S_E911.2703.2703.2.dta	DLDEcQTNNGGcSLSPK	R	V	0.95	34.4	36.3	0	2	c5: Carbamidomethyl (+57.02), c12: Carbamidomethyl (+57.02)	948.238	1894.46	1894.79	2	0.6763	356.8	254	270	TRUE
Papilin CG33103-PA, isoform A [Drosophila melanogaster]	gi|28572036	312636	1	51	58	438	0.00205	0.228	TRUE	S_A11Dros.2976.2976.3.dta	GVDVcNEPVTTGPcTDWQTK	K	Y	0.95	34.4	36	0	2	c5: Carbamidomethyl (+57.02), c14: Carbamidomethyl (+57.02)	755.522	2263.54	2264	3	0.555	245.1	2249	2268	TRUE
Papilin CG33103-PA, isoform A [Drosophila melanogaster]	gi|28572036	312636	1	51	58	438	0.00205	0.228	TRUE	S_E911.7862.7862.2.dta	DLAPGYNDLLLLPEGATNIR	K	I	0.95	34.4	36.2	0	2		1077.89	2153.77	2155.14	2	-0.365	-169.4	224	243	TRUE
Papilin CG33103-PA, isoform A [Drosophila melanogaster]	gi|28572036	312636	1	51	58	438	0.00205	0.228	TRUE	S_G3.2794.2794.2.dta	QPDPAPTVAQcSQPADPGQcDK	R	W	0.95	34.4	35.9	0	2	c11: Carbamidomethyl (+57.02), c20: Carbamidomethyl (+57.02)	1183.83	2365.64	2367.03	2	-0.3917	-165.5	1991	2012	TRUE
Papilin CG33103-PA, isoform A [Drosophila melanogaster]	gi|28572036	312636	1	51	58	438	0.00205	0.228	TRUE	S_E912.2645.2645.2.dta	QPDPAPTVAQcSQPADPGQcDK	R	W	0.95	34.4	36	0	2	c11: Carbamidomethyl (+57.02), c20: Carbamidomethyl (+57.02)	1184.63	2367.24	2367.03	2	1.214	512.7	1991	2012	TRUE
alpha Spectrin CG1977-PA [Drosophila melanogaster]	gi|17136504	278289	1	40	44	127	0.000594	0.207	TRUE	S_A11Dros.3615.3615.2.dta	DALDYIDFTR	K	T	0.95	34.4	36.6	0	2		614.574	1227.13	1228.59	2	-0.4455	-362.8	2401	2410	TRUE
zormin CG33484-PD, isoform D [Drosophila melanogaster]	gi|116007762	411353	1	35	37	226	0.00106	0.131	TRUE	A9.3643.3643.2.dta	ITTQSDSELGVFK	R	L	0.95	34.4	36.3	0	2		712.688	1423.36	1424.73	2	-0.3588	-251.9	1844	1856	TRUE
Aconitase CG9244-PB, isoform B [Drosophila melanogaster]	gi|17864292	85383.5	1	27	37	473	0.00221	0.417	TRUE	S_F5.5922.5922.2.dta	FDSDVYLPYEK	K	L	0.95	34.4	36.6	0	2		688.275	1374.53	1375.64	2	-0.09962	-72.42	44	54	TRUE
Larval serum protein 1 gamma CG6821-PA [Drosophila melanogaster]	gi|17647601	93395.1	1	24	29	120	0.000561	0.31	TRUE	S_A10Dros.1893.1893.2.dta	YVmLASEGK	K	Y	0.95	34.4	36.7	0	2	m3: Oxidation (+15.99)	507.18	1012.34	1013.5	2	-0.1453	-143.4	644	652	TRUE
Cytochrome P450-4g1 CG3972-PA [Drosophila melanogaster]	gi|17933498	62954.7	1	24	31	601	0.00281	0.39	TRUE	S_F911.4835.4835.3.dta	SFVPTFVDHSK	K	A	0.95	34.4	36.6	0	2		421.916	1262.72	1263.64	3	0.0942	74.54	166	176	TRUE
Cytochrome P450-4g1 CG3972-PA [Drosophila melanogaster]	gi|17933498	62954.7	1	24	31	601	0.00281	0.39	TRUE	S_A9Dros.3183.3183.2.dta	mmNIILGMTSK	R	V	0.95	34.4	36.8	0	2	m1: Oxidation (+15.99), m2: Oxidation (+15.99)	636.332	1270.65	1270.62	2	1.036	814.3	261	271	TRUE
Fat body protein 1 CG17285-PA, isoform A [Drosophila melanogaster]	gi|24664081,gi|24664085	119646	1	22	30	257	0.0012	0.244	TRUE	A2.2619.2619.2.dta	QVVQDNNIEQIDR	R	T	0.95	34.4	36.8	0	2		786.297	1570.58	1570.78	2	0.804	511.6	735	747	TRUE
CG3415 CG3415-PA [Drosophila melanogaster]	gi|18859837	64056.3	1	16	18	76	0.000356	0.328	TRUE	S_F6.5075.5075.2.dta	AGGEAVADYNSVIDGAK	K	V	0.95	34.4	36.5	0	2		819.5	1636.98	1636.78	2	1.209	738.4	68	84	TRUE
Actin 87E CG18290-PA, isoform A [Drosophila melanogaster]	gi|17137090,gi|24646579	41784.9	1	15	24	417	0.00195	0.423	TRUE	A7.3050.3050.3.dta	QEYDESGPGIVHR	K	K	0.95	34.4	36.7	1.25	2		496.666	1486.97	1486.69	3	1.29	866.8	361	373	TRUE	gi|17647135,gi|17975540
Actin 87E CG18290-PA, isoform A [Drosophila melanogaster]	gi|17137090,gi|24646579	41784.9	1	15	24	417	0.00195	0.423	TRUE	S_A6Dros.3298.3298.2.dta	VAPEEHPVLLTEAPLNPK	R	A	0.95	34.4	36.3	0	2		977.397	1952.78	1954.07	2	-0.2785	-142.6	97	114	TRUE	gi|17647135,gi|62473515,gi|62473526,gi|24639997,gi|17975540,gi|17530805
lethal (1) G0156 CG12233-PA, isoform A [Drosophila melanogaster]	gi|24643268,gi|24643270	38567.3	1	11	11	132	0.000618	0.35	TRUE	S_G2.5992.5992.2.dta	FGIPQAAIDSVNTNK	K	I	0.95	34.4	36.5	0	2		788.237	1574.46	1574.82	2	0.6485	411.6	71	85	TRUE
midline fasciclin CG3359-PB, isoform B [Drosophila melanogaster]	gi|24646161,gi|24646163,gi|28573037,gi|28573039,gi|28573041,gi|28573043,gi|28573045,gi|28573047,gi|28573049,gi|28573051,gi|28573053,gi|28573055,gi|28573057,gi|28573059,gi|28573061	90614.6	1	11	11	29	0.000136	0.15	TRUE	S_A10Dros.2167.2167.2.dta	SIESISGQHLR	R	I	0.95	34.4	36.7	0	2		614.441	1226.87	1226.65	2	1.225	997.9	742	752	TRUE
Mitochondrial phosphate carrier protein CG4994-PA, isoform A [Drosophila melanogaster]	gi|24664191,gi|24664195	38832.9	1	8	12	46	0.000215	0.32	TRUE	S_E4.4261.4261.2.dta	TVELLYK	R	Y	0.95	34.4	36.4	0	2		433.221	864.427	865.504	2	-0.06911	-79.86	238	244	TRUE
CG13091 CG13091-PA [Drosophila melanogaster]	gi|19920962	59459.3	1	8	8	37	0.000173	0.205	TRUE	S_F2.6376.6376.2.dta	SVFVTGGTGFLGK	K	V	0.95	34.4	36.6	0	2		635.314	1268.61	1269.68	2	-0.06482	-51.06	13	25	TRUE
Cysteine proteinase-1 CG6692-PC, isoform C [Drosophila melanogaster]	gi|24653514,gi|24653516,gi|24653518	41582.6	1	8	8	104	0.000487	0.259	TRUE	S_A5Dros.3688.3688.2.dta	SGVLVSLSEQNLVDcSTK	K	Y	0.95	34.4	36.3	0	2	c15: Carbamidomethyl (+57.02)	968.489	1934.96	1935.97	2	0.0006353	0.3282	195	212	TRUE
growl CG14648-PB, isoform B [Drosophila melanogaster]	gi|161078016,gi|21355167	58944	1	7	7	22	0.000103	0.183	TRUE	S_G2.7590.7590.2.dta	YDTPVDIIATPTEIIR	K	V	0.95	34.4	36.5	0	2		909.124	1816.23	1816.97	2	0.2697	148.4	212	227	TRUE
CG5214 CG5214-PA [Drosophila melanogaster]	gi|24645909	49907.2	1	7	8	48	0.000225	0.182	TRUE	S_F910.5620.5620.2.dta	GLVVPVIR	R	N	0.95	34.4	35.5	0	2		427.164	852.313	852.567	2	0.7533	882.8	341	348	TRUE
Ryanodine receptor 44F CG10844-PA, isoform A [Drosophila melanogaster]	gi|17352465,gi|17352467,gi|17352469,gi|17352471	580996	1	6	6	11	5.15e-05	0.0162	TRUE	S_F2.6155.6155.2.dta	ADELFNEVTQDASGK	R	G	0.95	34.4	36.5	0	2		812.753	1623.49	1623.75	2	0.7483	460.6	1596	1610	TRUE
Cytochrome c proximal CG17903-PA [Drosophila melanogaster]	gi|17137228	11717	1	5	6	23	0.000108	0.38	TRUE	S_F4.4260.4260.2.dta	mIFAGLK	K	K	0.95	34.4	35.5	0	2	m1: Oxidation (+15.99)	398.214	794.412	795.444	2	-0.02454	-30.85	85	91	TRUE
Ribosomal protein S14a CG1524-PB, isoform B [Drosophila melanogaster]	gi|17975579,gi|17977696,gi|24640451	16246.9	1	5	5	46	0.000215	0.377	TRUE	S_A3Dros.1866.1866.2.dta	TPGPGAQSALR	K	A	0.95	34.4	35.9	0	2		527.24	1052.46	1054.56	2	-1.093	-1038	107	117	TRUE
CG1837 CG1837-PA [Drosophila melanogaster]	gi|18859803	46632.3	1	4	4	16	7.49e-05	0.111	TRUE	S_A8Dros.3855.3855.2.dta	DLPAITDFINK	R	E	0.95	34.4	36.7	0	2		623.759	1245.5	1246.67	2	-0.1589	-127.5	132	142	TRUE
CG9342 CG9342-PA [Drosophila melanogaster]	gi|24585552	98761.1	1	3	3	5	2.34e-05	0.0429	TRUE	S_E910.5106.5106.2.dta	ESETTSEQLDLLEK	K	Y	0.95	34.4	36.4	0	2		811.847	1621.68	1621.78	2	0.9046	557.5	367	380	TRUE
CG6463 CG6463-PA [Drosophila melanogaster]	gi|24662306	13770.2	1	3	3	8	3.74e-05	0.185	TRUE	A3.1580.1580.2.dta	YTEQLVK	K	Q	0.95	34.4	35.8	0	2		440.741	879.467	880.478	2	-0.003608	-4.098	47	53	TRUE
Microsomal glutathione S-transferase-like CG1742-PA, isoform A [Drosophila melanogaster]	gi|24643618	16849.7	1	3	3	34	0.000159	0.23	TRUE	S_E3.5894.5894.2.dta	TFANPEDLMSPK	K	L	0.95	34.4	36.7	0	2		674.859	1347.7	1349.64	2	-0.9316	-690.8	45	56	TRUE
Saposin-related CG12070-PA, isoform A [Drosophila melanogaster]	gi|17864128,gi|28571996	105946	1	3	4	12	5.61e-05	0.0336	TRUE	S_E910.2588.2588.3.dta	HLTTDAVcHVSGVcASR	K	Y	0.95	34.4	36.4	0	2	c8: Carbamidomethyl (+57.02), c14: Carbamidomethyl (+57.02)	624.191	1869.55	1869.87	3	0.6875	367.5	246	262	TRUE
CG5958 CG5958-PA [Drosophila melanogaster]	gi|24582499	33918.1	0.998	2	2	8	3.74e-05	0.085	TRUE	S_F8.4895.4895.3.dta	LGYLKPETVEIAR	R	V	0.95	34.4	36.6	0	2		497.442	1489.3	1488.84	3	1.467	984.2	15	27	TRUE
Eukaryotic initiation factor 4E CG4035-PB, isoform B [Drosophila melanogaster]	gi|17864468,gi|24661542,gi|24661546,gi|24661553,gi|24661557,gi|24661561,gi|24661565	29206.7	0.998	2	3	21	9.83e-05	0.193	TRUE	S_E9.2174.2174.3.dta	TSAPSTEQGRPEPPTSAAAPAEAK	K	D	0.95	34.4	36	2.41	2		784.543	2350.61	2351.15	3	0.4654	197.9	20	43	TRUE
Actin 79B CG7478-PA [Drosophila melanogaster]	gi|17975540	41769.7	0.998	2	2	4	1.87e-05	0.388	FALSE	A7.3050.3050.3.dta	QEYDESGPGIVHR	K	K	0.95	34.4	36.7	1.25	2		496.666	1486.97	1486.69	3	1.29	866.8	361	373	FALSE	gi|17647135,gi|17137090,gi|24646579
Actin 79B CG7478-PA [Drosophila melanogaster]	gi|17975540	41769.7	0.998	2	2	4	1.87e-05	0.388	FALSE	S_A6Dros.3298.3298.2.dta	VAPEEHPVLLTEAPLNPK	R	A	0.95	34.4	36.3	0	2		977.397	1952.78	1954.07	2	-0.2785	-142.6	97	114	FALSE	gi|17647135,gi|62473515,gi|62473526,gi|24639997,gi|17530805,gi|17137090,gi|24646579
Actin 5C CG4027-PB, isoform B [Drosophila melanogaster]	gi|17530805,gi|24639997,gi|62473515,gi|62473526	41804.7	0.998	2	3	13	6.08e-05	0.364	FALSE	S_A6Dros.3298.3298.2.dta	VAPEEHPVLLTEAPLNPK	R	A	0.95	34.4	36.3	0	2		977.397	1952.78	1954.07	2	-0.2785	-142.6	97	114	FALSE	gi|17647135,gi|17975540,gi|17137090,gi|24646579
Actin 57B CG10067-PA, isoform A [Drosophila melanogaster]	gi|17647135	41817.9	0.5	1	2	54	0.000253	0.423	FALSE	S_A6Dros.3298.3298.2.dta	VAPEEHPVLLTEAPLNPK	R	A	0.95	34.4	36.3	0	2		977.397	1952.78	1954.07	2	-0.2785	-142.6	97	114	FALSE	gi|62473515,gi|62473526,gi|24639997,gi|17975540,gi|17530805,gi|17137090,gi|24646579
ECSIT CG10610-PA [Drosophila melanogaster]	gi|24644458	47047.7	0.995	1	1	3	1.4e-05	0.0636	TRUE	S_F910.2947.2947.3.dta	AEEIEGGASVPATSDNSSQDEHISSR	K	Q	0.95	34.4	35.8	1.92	2		891.968	2672.88	2673.19	3	0.6999	261.8	382	407	TRUE
CG4586 CG4586-PA [Drosophila melanogaster]	gi|24640268	76586.2	0.5	1	1	1	4.68e-06	0.0222	TRUE	S_F911.5607.5607.2.dta	AVATDEASEGVDLLR	K	K	0.95	34.4	36.5	0	2		773.893	1545.77	1545.78	2	1.002	648	400	414	TRUE
CG3156 CG3156-PA [Drosophila melanogaster]	gi|23397593	75768.6	0.5	1	1	1	4.68e-06	0.0159	TRUE	A8.2745.2745.2.dta	ELVASQAFGSR	R	-	0.95	34.4	36.4	0	2		583.109	1164.2	1164.6	2	0.6092	522.8	681	691	TRUE
Myosin heavy chain CG17927-PA, isoform A [Drosophila melanogaster]	gi|24584704,gi|28574239	224597	1	128	186	2330	0.0109	0.549	TRUE	S_E9.4659.4659.3.dta	NLEHDLDNLR	R	E	0.95	34.5	36.1	0	2		413.459	1237.35	1238.61	3	-0.2504	-202.2	1334	1343	TRUE	gi|24584700,gi|24584706,gi|24584710,gi|24584702,gi|24584712,gi|24584698
Myosin heavy chain CG17927-PA, isoform A [Drosophila melanogaster]	gi|24584704,gi|28574239	224597	1	128	186	2330	0.0109	0.549	TRUE	A9.1095.1095.3.dta	QLQHTLNEVQSK	K	L	0.95	34.5	36.3	0	2		475.534	1423.58	1424.75	3	-0.1643	-115.3	1250	1261	TRUE	gi|24584700,gi|24584706,gi|24584710,gi|24584702,gi|24584712,gi|24584698
Myosin heavy chain CG17927-PA, isoform A [Drosophila melanogaster]	gi|24584704,gi|28574239	224597	1	128	186	2330	0.0109	0.549	TRUE	S_F1.6869.6869.2.dta	FDLAPENEF	R	-	0.95	34.5	36.1	0	2		541.136	1080.26	1081.48	2	-0.2196	-203.1	1954	1962	TRUE	gi|24584700,gi|24584706,gi|24584710,gi|24584702,gi|24584698
Myosin heavy chain CG17927-PA, isoform A [Drosophila melanogaster]	gi|24584704,gi|28574239	224597	1	128	186	2330	0.0109	0.549	TRUE	S_F1.6693.6693.3.dta	QIEEAEEIAALNLAK	R	F	0.95	34.5	36.6	0	2		547.758	1640.25	1641.87	3	-0.6128	-373.4	1880	1894	TRUE	gi|24584700,gi|24584706,gi|24584710,gi|24584702,gi|24584712,gi|24584698
Myosin heavy chain CG17927-PA, isoform A [Drosophila melanogaster]	gi|24584704,gi|28574239	224597	1	128	186	2330	0.0109	0.549	TRUE	S_F8.4743.4743.2.dta	DLLQQVNPPK	K	Y	0.95	34.5	36.2	0	2		576.216	1150.42	1151.64	2	-0.2192	-190.4	75	84	TRUE	gi|24584700,gi|24584706,gi|24584710,gi|24584702,gi|24584712
bent CG32019-PA, isoform A [Drosophila melanogaster]	gi|28558739,gi|45552153	1.00129e+06	1	118	128	787	0.00368	0.191	TRUE	S_E911.7191.7191.2.dta	EEVVFLNVQPLPK	R	E	0.95	34.5	36.3	0	2		756.807	1511.6	1511.85	2	0.7582	501.2	8404	8416	TRUE
terribly reduced optic lobes CG33950-PF, isoform F [Drosophila melanogaster]	gi|78706474	513388	1	89	107	871	0.00408	0.237	TRUE	S_F2.5312.5312.2.dta	LEIPNIR	R	V	0.95	34.5	35.4	0	2		427.741	853.467	854.51	2	-0.03563	-41.7	1538	1544	TRUE	gi|161077537
terribly reduced optic lobes CG33950-PF, isoform F [Drosophila melanogaster]	gi|78706474	513388	1	89	107	871	0.00408	0.237	TRUE	S_G1.3492.3492.2.dta	GSGRPVNGPDVIITGNR	R	F	0.95	34.5	36.6	0	2		855.099	1708.18	1708.91	2	0.2798	163.7	1953	1969	TRUE	gi|161077537
sallimus CG1915-PC, isoform C [Drosophila melanogaster]	gi|161080703	2.06604e+06	1	83	86	363	0.0017	0.0614	TRUE	S_G2.4532.4532.2.dta	HVQEAAEAIAPPQFK	R	T	0.95	34.5	36.6	0	2		818.329	1634.64	1635.85	2	-0.1999	-122.2	879	893	TRUE
Paramyosin CG5939-PA, isoform A [Drosophila melanogaster]	gi|24661112,gi|24661116	102322	1	39	51	578	0.0027	0.494	TRUE	S_E8.4583.4583.2.dta	VQLDTVSFSK	K	S	0.95	34.5	36	0	2		562.289	1122.56	1123.6	2	-0.03051	-27.16	225	234	TRUE
Paramyosin CG5939-PA, isoform A [Drosophila melanogaster]	gi|24661112,gi|24661116	102322	1	39	51	578	0.0027	0.494	TRUE	S_E912.2901.2901.3.dta	RLENERDELTAAYK	R	E	0.95	34.5	36.7	2.57	2		569.547	1705.62	1707.87	3	-1.242	-727.8	461	474	TRUE
CG1516 CG1516-PE, isoform E [Drosophila melanogaster]	gi|19921944,gi|24652210,gi|24652212,gi|24652214,gi|24652216,gi|24652218,gi|24652220,gi|24652222,gi|24652224	130848	1	36	39	469	0.00219	0.346	TRUE	S_F8.4203.4203.2.dta	LPIEIR	R	D	0.95	34.5	34.6	0	2		370.66	739.304	740.467	2	-0.1557	-210.4	285	290	TRUE
CG4389 CG4389-PB, isoform B [Drosophila melanogaster]	gi|24583077,gi|24583079	79622	1	27	31	210	0.000983	0.423	TRUE	S_A5Dros.1958.1958.2.dta	LLQEGVDPK	R	D	0.95	34.5	36.1	0	2		499.716	997.417	998.553	2	-0.128	-128.2	534	542	TRUE
Clathrin heavy chain CG9012-PE, isoform E [Drosophila melanogaster]	gi|161077848,gi|161077850,gi|17137000,gi|24642310,gi|45555323,gi|45555333	191165	1	27	27	138	0.000646	0.196	TRUE	S_E912.3148.3148.2.dta	RPISADSAIMNPASK	R	V	0.95	34.5	36.7	0	2		779.338	1556.66	1557.81	2	-0.1383	-88.8	64	78	TRUE
Aconitase CG9244-PB, isoform B [Drosophila melanogaster]	gi|17864292	85383.5	1	27	37	473	0.00221	0.417	TRUE	S_A7Dros.1375.1375.2.dta	EHAALEPR	R	H	0.95	34.5	36.3	0	2		461.704	921.392	922.475	2	-0.07524	-81.57	680	687	TRUE
Larval serum protein 1 gamma CG6821-PA [Drosophila melanogaster]	gi|17647601	93395.1	1	24	29	120	0.000561	0.31	TRUE	S_A10Dros.3485.3485.2.dta	DWETFVR	K	N	0.95	34.5	36.1	0	2		476.729	951.442	952.453	2	-0.003431	-3.603	117	123	TRUE
Larval serum protein 1 gamma CG6821-PA [Drosophila melanogaster]	gi|17647601	93395.1	1	24	29	120	0.000561	0.31	TRUE	S_E911.6068.6068.2.dta	DWETFVR	K	N	0.95	34.5	35.6	0	2		477.148	952.281	952.453	2	0.8356	876.5	117	123	TRUE
Laminin B1 CG7123-PA, isoform A [Drosophila melanogaster]	gi|17136294,gi|24582614	198314	1	23	25	131	0.000613	0.163	TRUE	S_G2.6068.6068.2.dta	QVGATGAYTSEFSELDK	K	K	0.95	34.5	36.4	0	2		902.139	1802.26	1802.85	2	0.4257	236.1	1219	1235	TRUE
Fat body protein 1 CG17285-PA, isoform A [Drosophila melanogaster]	gi|24664081,gi|24664085	119646	1	22	30	257	0.0012	0.244	TRUE	S_F911.3636.3636.2.dta	QQNIQNVLGQK	K	R	0.95	34.5	36.8	0	2		635.713	1269.41	1269.69	2	0.726	571.5	229	239	TRUE
Cytochrome P450 reductase CG11567-PA, isoform A [Drosophila melanogaster]	gi|17137192	76331.1	1	18	20	177	0.000828	0.321	TRUE	A5.2219.2219.2.dta	LLEQPDVQPDR	R	I	0.95	34.5	36.3	0	2		655.773	1309.53	1309.68	2	0.8622	657.9	251	261	TRUE
stress-sensitive B CG16944-PA, isoform A [Drosophila melanogaster]	gi|18079273,gi|24641095	32892.2	1	18	26	349	0.00163	0.505	TRUE	S_A5Dros.1822.1822.2.dta	ATEVIYK	K	N	0.95	34.5	35.6	0	2		412.681	823.346	823.457	2	0.8969	1088	247	253	TRUE
Lamin C CG10119-PA [Drosophila melanogaster]	gi|24653664	69843.7	1	17	18	59	0.000276	0.33	TRUE	S_E8.3524.3524.2.dta	LQNLEDTNAGLNAR	K	I	0.95	34.5	36.5	0	2		764.83	1527.64	1528.77	2	-0.1204	-78.78	321	334	TRUE
Vinculin CG3299-PA [Drosophila melanogaster]	gi|17136646	106286	1	17	18	99	0.000463	0.223	TRUE	S_F1.3357.3357.2.dta	QEADNSEDPVFTER	K	L	0.95	34.5	36.5	0	2		818.779	1635.54	1636.71	2	-0.1597	-97.6	655	668	TRUE
ATP synthase-beta CG11154-PA, isoform A [Drosophila melanogaster]	gi|24638766	54091	1	17	26	585	0.00274	0.457	TRUE	A3.2566.2566.2.dta	TIAmDGTEGLVR	R	G	0.95	34.5	36.6	0	2	m4: Oxidation (+15.99)	639.641	1277.27	1278.64	2	-0.3631	-284.1	87	98	TRUE
Heat shock protein cognate 3 CG4147-PA, isoform A [Drosophila melanogaster]	gi|24641402,gi|24641404,gi|24641406,gi|24641408	72244.5	1	17	21	185	0.000866	0.314	TRUE	S_E912.7151.7151.2.dta	VFAPEEISAmVLGK	K	M	0.95	34.5	36.5	0	2	m10: Oxidation (+15.99)	754.065	1506.11	1506.79	2	0.3336	221.3	139	152	TRUE
CG6206 CG6206-PA, isoform A [Drosophila melanogaster]	gi|19921088	122670	1	16	18	68	0.000318	0.181	TRUE	S_E4.4432.4432.2.dta	IPVPYSNYR	R	I	0.95	34.5	36.3	0	2		554.557	1107.1	1108.58	2	-0.4734	-427.2	520	528	TRUE
Aldehyde dehydrogenase CG3752-PA [Drosophila melanogaster]	gi|20129399	57002	1	16	20	178	0.000833	0.34	TRUE	S_E911.4199.4199.2.dta	IYDEFVER	K	S	0.95	34.5	36.4	0	2		535.723	1069.43	1070.52	2	-0.07723	-72.15	333	340	TRUE
Glutactin CG9280-PA, isoform A [Drosophila melanogaster]	gi|17137794,gi|24582896,gi|24582898	118731	1	15	16	148	0.000692	0.191	TRUE	A11.2915.2915.2.dta	SPDEEEAAEQDVLK	R	V	0.95	34.5	36.7	0	2		780.287	1558.56	1559.71	2	-0.1412	-90.56	961	974	TRUE
Actin 87E CG18290-PA, isoform A [Drosophila melanogaster]	gi|17137090,gi|24646579	41784.9	1	15	24	417	0.00195	0.423	TRUE	S_E3.2725.2725.3.dta	QEYDESGPGIVHR	K	K	0.95	34.5	36.8	0	2		496.435	1486.28	1486.69	3	0.5958	400.6	361	373	TRUE	gi|17647135,gi|17975540
Actin 87E CG18290-PA, isoform A [Drosophila melanogaster]	gi|17137090,gi|24646579	41784.9	1	15	24	417	0.00195	0.423	TRUE	S_A7Dros.1262.1262.2.dta	HQGVmVGmGQK	R	D	0.95	34.5	36.9	0	2	m5: Oxidation (+15.99), m8: Oxidation (+15.99)	602.216	1202.42	1203.56	2	-0.1381	-114.8	41	51	TRUE	gi|17647135,gi|62473515,gi|62473526,gi|24639997,gi|17975540,gi|17530805
Actin 87E CG18290-PA, isoform A [Drosophila melanogaster]	gi|17137090,gi|24646579	41784.9	1	15	24	417	0.00195	0.423	TRUE	S_G2.5573.5573.3.dta	VAPEEHPVLLTEAPLNPK	R	A	0.95	34.5	36.3	0	2		651.889	1952.64	1954.07	3	-0.4146	-212.2	97	114	TRUE	gi|17647135,gi|62473515,gi|62473526,gi|24639997,gi|17975540,gi|17530805
Zeelin1 CG6803-PB, isoform B [Drosophila melanogaster]	gi|21357797	41650.6	1	13	14	71	0.000332	0.405	TRUE	A8.3372.3372.2.dta	YGLYLR	R	D	0.95	34.5	36.4	0	2		393.073	784.131	784.436	2	0.7027	895	129	134	TRUE
CG9090 CG9090-PA [Drosophila melanogaster]	gi|24656137	40535.9	1	13	16	119	0.000557	0.299	TRUE	S_E7.5205.5205.2.dta	TLELLYK	R	Y	0.95	34.5	35.8	0	2		440.785	879.555	879.519	2	1.043	1185	251	257	TRUE
CG9090 CG9090-PA [Drosophila melanogaster]	gi|24656137	40535.9	1	13	16	119	0.000557	0.299	TRUE	S_E8.5218.5218.2.dta	TLELLYK	R	Y	0.95	34.5	35.8	0	2		440.828	879.641	879.519	2	1.129	1282	251	257	TRUE
CG7145 CG7145-PA, isoform A [Drosophila melanogaster]	gi|24668413,gi|24668417,gi|24668425	63651.1	1	13	13	55	0.000257	0.279	TRUE	S_A9Dros.2594.2594.3.dta	IWEKAADLMATTYR	K	Q	0.95	34.5	36.5	0	2		557.262	1668.76	1668.84	3	0.9284	556	136	149	TRUE
Glycoprotein 93 CG5520-PA [Drosophila melanogaster]	gi|21357739	90224	1	12	15	116	0.000543	0.196	TRUE	S_F910.5504.5505.2.dta	GVVDSDDLPLNVSR	R	E	0.95	34.5	36.7	0	2		743.764	1485.51	1485.76	2	0.7646	514.3	434	447	TRUE
knockdown CG3861-PB, isoform B [Drosophila melanogaster]	gi|24640124,gi|24640126	58199.5	1	12	15	71	0.000332	0.272	TRUE	S_E910.6145.6145.2.dta	ALVTETSVLDADEGIR	K	F	0.95	34.5	36.4	0	2		845.283	1688.55	1688.87	2	0.6878	407.1	136	151	TRUE
ERp60 CG8983-PA, isoform A [Drosophila melanogaster]	gi|45551086	55354.5	1	11	12	72	0.000337	0.28	TRUE	S_A5Dros.1898.1898.2.dta	QDEVSQDYNGPR	R	E	0.95	34.5	36.3	0	2		704.204	1406.39	1407.61	2	-0.2135	-151.7	106	117	TRUE
Succinyl coenzyme A synthetase flavoprotein subunit CG17246-PA, isoform A [Drosophila melanogaster]	gi|17137288,gi|24655642,gi|24655647	72325.6	1	11	14	78	0.000365	0.25	TRUE	S_F911.3809.3809.3.dta	TIAELNKPGAPAPTLK	K	E	0.95	34.5	36.4	1.74	2		541.298	1620.87	1620.93	3	0.9448	582.5	468	483	TRUE
CG7920 CG7920-PA, isoform A [Drosophila melanogaster]	gi|21358615	51836.5	1	10	12	100	0.000468	0.262	TRUE	S_F910.4115.4115.3.dta	EPPIVKPEEAVAcVK	R	S	0.95	34.5	36.2	0	2	c13: Carbamidomethyl (+57.02)	556.16	1665.46	1665.89	3	0.5748	344.9	45	59	TRUE
alpha-Tubulin at 84B CG1913-PA [Drosophila melanogaster]	gi|17136564,gi|17737821,gi|24644849	49890.4	1	10	11	84	0.000393	0.287	TRUE	S_E4.7126.7126.2.dta	AVFVDLEPTVVDEVR	R	T	0.95	34.5	36.8	0	2		844.466	1686.92	1687.89	2	0.03267	19.36	65	79	TRUE
wings up A CG7178-PA, isoform A [Drosophila melanogaster]	gi|24642961	24472.4	1	9	11	39	0.000182	0.337	TRUE	S_A6Dros.1599.1599.1.dta	VKEEVEAEA	K	-	0.95	34.5	37.2	0	2		1004.26	1003.26	1003.49	1	0.7687	765.5	200	208	TRUE	gi|24642959,gi|24642957,gi|24642955,gi|24642963
coracle CG11949-PA, isoform A [Drosophila melanogaster]	gi|24655527	184153	1	8	10	43	0.000201	0.073	TRUE	S_F910.2393.2393.3.dta	PAEIKPSAPAEPETPTK	M	S	0.95	34.5	36.5	0	2		588.38	1762.12	1762.92	3	0.2024	114.8	2	18	TRUE
CG3074 CG3074-PA, isoform A [Drosophila melanogaster]	gi|24657813,gi|24657819	48768.3	1	8	13	44	0.000206	0.213	TRUE	S_A8Dros.2193.2193.2.dta	LVGWGEEHNGEK	K	Y	0.95	34.5	36.7	0	2		678.151	1354.29	1354.64	2	0.6542	482.7	371	382	TRUE
scully CG7113-PA [Drosophila melanogaster]	gi|17737361	26887.2	1	7	8	94	0.00044	0.373	TRUE	S_F5.4668.4668.2.dta	AAVVGmTLPIAR	K	D	0.95	34.5	36.8	0	2	m6: Oxidation (+15.99)	607.668	1213.32	1214.69	2	-0.3655	-301	167	178	TRUE
Vha100-1 CG1709-PE, isoform E [Drosophila melanogaster]	gi|21358171,gi|24650956,gi|24650959,gi|24650961,gi|24650963,gi|24650965,gi|24650967	97156	1	7	8	17	7.95e-05	0.104	TRUE	S_F912.3865.3865.2.dta	ATLYPcPEAPADR	R	R	0.95	34.5	36.5	0	2	c6: Carbamidomethyl (+57.02)	731.369	1460.72	1460.68	2	1.046	715.7	267	279	TRUE
Elongation factor 1alpha48D CG8280-PA, isoform A [Drosophila melanogaster]	gi|17137572,gi|24652838	50289.3	1	7	9	89	0.000416	0.168	TRUE	A9.1395.1395.2.dta	MDSSEPPYSEAR	K	Y	0.95	34.5	36.2	0	2		684.199	1366.38	1368.57	2	-1.185	-866.3	155	166	TRUE
ade5 CG3989-PA [Drosophila melanogaster]	gi|18860083	47264.2	1	7	7	29	0.000136	0.184	TRUE	S_E6.3342.3342.2.dta	AEISNTTNGQVFR	K	L	0.95	34.5	36.3	0	2		719.271	1436.53	1436.71	2	0.8201	570.5	59	71	TRUE
CG3961 CG3961-PA, isoform A [Drosophila melanogaster]	gi|24666497,gi|24666501	78685.6	1	6	6	20	9.36e-05	0.126	TRUE	S_F7.3510.3510.2.dta	LSQGEYIVPEK	K	I	0.95	34.5	36.7	0	2		631.777	1261.54	1262.66	2	-0.1177	-93.23	569	579	TRUE
CG2233 CG2233-PA [Drosophila melanogaster]	gi|18921139	46492.2	1	6	8	24	0.000112	0.14	TRUE	S_F910.4577.4577.1.dta	SELDAYLAK	K	E	0.95	34.5	35.9	0	2		1010.27	1009.26	1009.52	1	0.7499	742.2	207	215	TRUE
Ryanodine receptor 44F CG10844-PA, isoform A [Drosophila melanogaster]	gi|17352465,gi|17352467,gi|17352469,gi|17352471	580996	1	6	6	11	5.15e-05	0.0162	TRUE	S_G2.3083.3083.3.dta	FTLSQTAPGEEKPK	K	S	0.95	34.5	36.5	0	2		511.709	1532.1	1532.8	3	0.3164	206.4	2568	2581	TRUE
lethal (2) 03709 CG15081-PE, isoform E [Drosophila melanogaster]	gi|161077242	37263.5	1	6	7	25	0.000117	0.198	TRUE	S_F8.5726.5726.2.dta	VLPSIcNEVLK	K	S	0.95	34.5	36.9	0	2	c6: Carbamidomethyl (+57.02)	636.693	1271.37	1271.7	2	0.674	529.7	133	143	TRUE
wings up A CG7178-PB, isoform B [Drosophila melanogaster]	gi|24642959	24408.2	1	5	7	54	0.000253	0.351	FALSE	S_A6Dros.1599.1599.1.dta	VKEEVEAEA	K	-	0.95	34.5	37.2	0	2		1004.26	1003.26	1003.49	1	0.7687	765.5	200	208	FALSE	gi|24642957,gi|24642955,gi|24642961,gi|24642963
CG3214 CG3214-PA [Drosophila melanogaster]	gi|24581165	16806.2	1	5	5	13	6.08e-05	0.289	TRUE	A3.2312.2312.2.dta	TDLPPIR	K	D	0.95	34.5	35.5	0	2		406.139	810.262	811.468	2	-0.1985	-244.7	92	98	TRUE
Cuticular protein 64Ad CG1259-PB [Drosophila melanogaster]	gi|21355869	24260.9	1	5	5	19	8.89e-05	0.279	TRUE	S_F7.4030.4030.2.dta	GSYSLIEPDGSR	R	R	0.95	34.5	36.3	0	2		641.381	1280.75	1280.61	2	1.141	890.4	174	185	TRUE
Rho1 CG8416-PA, isoform A [Drosophila melanogaster]	gi|17137100,gi|19549710,gi|19549712,gi|24654021,gi|45552649,gi|45552651,gi|45552653	21705.5	1	4	4	6	2.81e-05	0.167	TRUE	A5.2045.2045.2.dta	DVFETATR	R	A	0.95	34.5	35.6	0	2		469.626	937.237	938.458	2	-0.2139	-228	169	176	TRUE
CG10664 CG10664-PA, isoform A [Drosophila melanogaster]	gi|19921566,gi|45552419	20501.9	1	4	4	35	0.000164	0.198	TRUE	A3.2564.2564.2.dta	EPTNEINALR	R	A	0.95	34.5	36.7	0	2		578.716	1155.42	1156.6	2	-0.1718	-148.6	67	76	TRUE
Translationally controlled tumor protein CG4800-PA [Drosophila melanogaster]	gi|24645861	19620.2	1	4	4	17	7.95e-05	0.262	TRUE	S_E3.4967.4967.2.dta	SPDQVDIFK	K	T	0.95	34.5	36.9	0	2		525.252	1048.49	1048.53	2	0.964	918.5	105	113	TRUE
Larval serum protein 1 beta CG4178-PA [Drosophila melanogaster]	gi|17136306	95900.8	1	4	5	13	6.08e-05	0.0697	TRUE	S_F9.4121.4121.2.dta	ENIYEFNQETK	R	W	0.95	34.5	36.7	0	2		707.785	1413.55	1414.65	2	-0.08742	-61.8	247	257	TRUE
Histone H2A variant CG5499-PA [Drosophila melanogaster]	gi|17738227	14963.8	1	4	5	36	0.000168	0.206	TRUE	S_A3Dros.1271.1271.3.dta	KEETVQDPQR	K	K	0.95	34.5	36.8	0	2		410.902	1229.68	1229.61	3	1.077	875	122	131	TRUE
Peroxiredoxin 2540 CG11765-PA [Drosophila melanogaster]	gi|17975518,gi|24652434,gi|24652436	24738.5	1	3	3	10	4.68e-05	0.168	TRUE	A5.2899.2899.2.dta	VVATPANWTPGTK	K	V	0.95	34.5	36.9	0	2		671.236	1340.46	1341.72	2	-0.2521	-187.9	170	182	TRUE
coro CG9446-PA, isoform A [Drosophila melanogaster]	gi|24586098,gi|24586100,gi|45552461	57250.9	1	3	3	3	1.4e-05	0.0795	TRUE	S_A9Dros.1638.1638.2.dta	GcDVTTcEVAK	R	F	0.95	34.5	36.1	0	2	c2: Carbamidomethyl (+57.02), c7: Carbamidomethyl (+57.02)	620.279	1238.54	1239.54	2	0.01555	12.54	323	333	TRUE
Myosin heavy chain CG17927-PF, isoform F [Drosophila melanogaster]	gi|24584700	224516	0.998	2	2	20	9.36e-05	0.548	FALSE	S_E9.4659.4659.3.dta	NLEHDLDNLR	R	E	0.95	34.5	36.1	0	2		413.459	1237.35	1238.61	3	-0.2504	-202.2	1334	1343	FALSE	gi|24584704,gi|28574239,gi|24584706,gi|24584710,gi|24584702,gi|24584712,gi|24584698
Myosin heavy chain CG17927-PF, isoform F [Drosophila melanogaster]	gi|24584700	224516	0.998	2	2	20	9.36e-05	0.548	FALSE	A9.1095.1095.3.dta	QLQHTLNEVQSK	K	L	0.95	34.5	36.3	0	2		475.534	1423.58	1424.75	3	-0.1643	-115.3	1250	1261	FALSE	gi|24584704,gi|28574239,gi|24584706,gi|24584710,gi|24584702,gi|24584712,gi|24584698
Myosin heavy chain CG17927-PF, isoform F [Drosophila melanogaster]	gi|24584700	224516	0.998	2	2	20	9.36e-05	0.548	FALSE	S_F1.6869.6869.2.dta	FDLAPENEF	R	-	0.95	34.5	36.1	0	2		541.136	1080.26	1081.48	2	-0.2196	-203.1	1954	1962	FALSE	gi|24584704,gi|28574239,gi|24584706,gi|24584710,gi|24584702,gi|24584698
Myosin heavy chain CG17927-PF, isoform F [Drosophila melanogaster]	gi|24584700	224516	0.998	2	2	20	9.36e-05	0.548	FALSE	S_F1.6693.6693.3.dta	QIEEAEEIAALNLAK	R	F	0.95	34.5	36.6	0	2		547.758	1640.25	1641.87	3	-0.6128	-373.4	1880	1894	FALSE	gi|24584704,gi|28574239,gi|24584706,gi|24584710,gi|24584702,gi|24584712,gi|24584698
Myosin heavy chain CG17927-PF, isoform F [Drosophila melanogaster]	gi|24584700	224516	0.998	2	2	20	9.36e-05	0.548	FALSE	S_F8.4743.4743.2.dta	DLLQQVNPPK	K	Y	0.95	34.5	36.2	0	2		576.216	1150.42	1151.64	2	-0.2192	-190.4	75	84	FALSE	gi|24584704,gi|28574239,gi|24584706,gi|24584710,gi|24584702,gi|24584712
Myosin heavy chain CG17927-PB, isoform B [Drosophila melanogaster]	gi|24584710	224397	0.998	2	2	9	4.21e-05	0.534	FALSE	S_E9.4659.4659.3.dta	NLEHDLDNLR	R	E	0.95	34.5	36.1	0	2		413.459	1237.35	1238.61	3	-0.2504	-202.2	1334	1343	FALSE	gi|24584704,gi|24584700,gi|28574239,gi|24584706,gi|24584702,gi|24584712,gi|24584698
Myosin heavy chain CG17927-PB, isoform B [Drosophila melanogaster]	gi|24584710	224397	0.998	2	2	9	4.21e-05	0.534	FALSE	A9.1095.1095.3.dta	QLQHTLNEVQSK	K	L	0.95	34.5	36.3	0	2		475.534	1423.58	1424.75	3	-0.1643	-115.3	1250	1261	FALSE	gi|24584704,gi|24584700,gi|28574239,gi|24584706,gi|24584702,gi|24584712,gi|24584698
Myosin heavy chain CG17927-PB, isoform B [Drosophila melanogaster]	gi|24584710	224397	0.998	2	2	9	4.21e-05	0.534	FALSE	S_F1.6869.6869.2.dta	FDLAPENEF	R	-	0.95	34.5	36.1	0	2		541.136	1080.26	1081.48	2	-0.2196	-203.1	1954	1962	FALSE	gi|24584704,gi|24584700,gi|28574239,gi|24584706,gi|24584702,gi|24584698
Myosin heavy chain CG17927-PB, isoform B [Drosophila melanogaster]	gi|24584710	224397	0.998	2	2	9	4.21e-05	0.534	FALSE	S_F1.6693.6693.3.dta	QIEEAEEIAALNLAK	R	F	0.95	34.5	36.6	0	2		547.758	1640.25	1641.87	3	-0.6128	-373.4	1880	1894	FALSE	gi|24584704,gi|24584700,gi|28574239,gi|24584706,gi|24584702,gi|24584712,gi|24584698
Myosin heavy chain CG17927-PB, isoform B [Drosophila melanogaster]	gi|24584710	224397	0.998	2	2	9	4.21e-05	0.534	FALSE	S_F8.4743.4743.2.dta	DLLQQVNPPK	K	Y	0.95	34.5	36.2	0	2		576.216	1150.42	1151.64	2	-0.2192	-190.4	75	84	FALSE	gi|24584704,gi|24584700,gi|28574239,gi|24584706,gi|24584702,gi|24584712
wings up A CG7178-PG, isoform G [Drosophila melanogaster]	gi|24642963	30064.7	1	2	3	4	1.87e-05	0.275	FALSE	S_A6Dros.1599.1599.1.dta	VKEEVEAEA	K	-	0.95	34.5	37.2	0	2		1004.26	1003.26	1003.49	1	0.7687	765.5	261	269	FALSE	gi|24642959,gi|24642957,gi|24642955,gi|24642961
Actin 79B CG7478-PA [Drosophila melanogaster]	gi|17975540	41769.7	0.998	2	2	4	1.87e-05	0.388	FALSE	S_E3.2725.2725.3.dta	QEYDESGPGIVHR	K	K	0.95	34.5	36.8	0	2		496.435	1486.28	1486.69	3	0.5958	400.6	361	373	FALSE	gi|17647135,gi|17137090,gi|24646579
Actin 79B CG7478-PA [Drosophila melanogaster]	gi|17975540	41769.7	0.998	2	2	4	1.87e-05	0.388	FALSE	S_A7Dros.1262.1262.2.dta	HQGVmVGmGQK	R	D	0.95	34.5	36.9	0	2	m5: Oxidation (+15.99), m8: Oxidation (+15.99)	602.216	1202.42	1203.56	2	-0.1381	-114.8	41	51	FALSE	gi|17647135,gi|62473515,gi|62473526,gi|24639997,gi|17530805,gi|17137090,gi|24646579
Actin 79B CG7478-PA [Drosophila melanogaster]	gi|17975540	41769.7	0.998	2	2	4	1.87e-05	0.388	FALSE	S_G2.5573.5573.3.dta	VAPEEHPVLLTEAPLNPK	R	A	0.95	34.5	36.3	0	2		651.889	1952.64	1954.07	3	-0.4146	-212.2	97	114	FALSE	gi|17647135,gi|62473515,gi|62473526,gi|24639997,gi|17530805,gi|17137090,gi|24646579
Myosin heavy chain CG17927-PJ, isoform J [Drosophila melanogaster]	gi|24584698	224394	0.998	2	2	3	1.4e-05	0.541	FALSE	S_E9.4659.4659.3.dta	NLEHDLDNLR	R	E	0.95	34.5	36.1	0	2		413.459	1237.35	1238.61	3	-0.2504	-202.2	1332	1341	FALSE	gi|24584704,gi|24584700,gi|28574239,gi|24584706,gi|24584710,gi|24584702,gi|24584712
Myosin heavy chain CG17927-PJ, isoform J [Drosophila melanogaster]	gi|24584698	224394	0.998	2	2	3	1.4e-05	0.541	FALSE	A9.1095.1095.3.dta	QLQHTLNEVQSK	K	L	0.95	34.5	36.3	0	2		475.534	1423.58	1424.75	3	-0.1643	-115.3	1248	1259	FALSE	gi|24584704,gi|24584700,gi|28574239,gi|24584706,gi|24584710,gi|24584702,gi|24584712
Myosin heavy chain CG17927-PJ, isoform J [Drosophila melanogaster]	gi|24584698	224394	0.998	2	2	3	1.4e-05	0.541	FALSE	S_F1.6869.6869.2.dta	FDLAPENEF	R	-	0.95	34.5	36.1	0	2		541.136	1080.26	1081.48	2	-0.2196	-203.1	1952	1960	FALSE	gi|24584704,gi|24584700,gi|28574239,gi|24584706,gi|24584710,gi|24584702
Myosin heavy chain CG17927-PJ, isoform J [Drosophila melanogaster]	gi|24584698	224394	0.998	2	2	3	1.4e-05	0.541	FALSE	S_F1.6693.6693.3.dta	QIEEAEEIAALNLAK	R	F	0.95	34.5	36.6	0	2		547.758	1640.25	1641.87	3	-0.6128	-373.4	1878	1892	FALSE	gi|24584704,gi|24584700,gi|28574239,gi|24584706,gi|24584710,gi|24584702,gi|24584712
Actin 5C CG4027-PB, isoform B [Drosophila melanogaster]	gi|17530805,gi|24639997,gi|62473515,gi|62473526	41804.7	0.998	2	3	13	6.08e-05	0.364	FALSE	S_A7Dros.1262.1262.2.dta	HQGVmVGmGQK	R	D	0.95	34.5	36.9	0	2	m5: Oxidation (+15.99), m8: Oxidation (+15.99)	602.216	1202.42	1203.56	2	-0.1381	-114.8	41	51	FALSE	gi|17647135,gi|17975540,gi|17137090,gi|24646579
Actin 5C CG4027-PB, isoform B [Drosophila melanogaster]	gi|17530805,gi|24639997,gi|62473515,gi|62473526	41804.7	0.998	2	3	13	6.08e-05	0.364	FALSE	S_G2.5573.5573.3.dta	VAPEEHPVLLTEAPLNPK	R	A	0.95	34.5	36.3	0	2		651.889	1952.64	1954.07	3	-0.4146	-212.2	97	114	FALSE	gi|17647135,gi|17975540,gi|17137090,gi|24646579
wings up A CG7178-PD, isoform D [Drosophila melanogaster]	gi|24642955,gi|24642957	24359.9	1	2	2	7	3.28e-05	0.279	FALSE	S_A6Dros.1599.1599.1.dta	VKEEVEAEA	K	-	0.95	34.5	37.2	0	2		1004.26	1003.26	1003.49	1	0.7687	765.5	200	208	FALSE	gi|24642959,gi|24642961,gi|24642963
Nipsnap CG9212-PB, isoform B [Drosophila melanogaster]	gi|18860049,gi|24642395,gi|24642398	31948.2	0.998	2	3	9	4.21e-05	0.0733	TRUE	S_E6.5082.5082.1.dta	VLAPTEFSPSQ	R	-	0.95	34.5	36.9	0	2		1176.3	1175.29	1175.59	1	0.7067	600.7	263	273	TRUE
CG15168 CG15168-PA [Drosophila melanogaster]	gi|19921518	12345.9	0.5	1	1	1	4.68e-06	0.0734	TRUE	S_A2Dros.1416.1416.2.dta	ATVDMQQK	R	T	0.95	34.5	36.7	0	2		461.175	920.335	920.451	2	0.8912	967.3	73	80	TRUE
Actin 57B CG10067-PA, isoform A [Drosophila melanogaster]	gi|17647135	41817.9	0.5	1	2	54	0.000253	0.423	FALSE	S_E3.2725.2725.3.dta	EEYDESGPGIVHR	K	K	0.95	34.5	36.8	0	2		496.435	1486.28	1487.68	3	-0.3882	-261	361	373	FALSE	gi|17975540,gi|17137090,gi|24646579
Actin 57B CG10067-PA, isoform A [Drosophila melanogaster]	gi|17647135	41817.9	0.5	1	2	54	0.000253	0.423	FALSE	S_A7Dros.1262.1262.2.dta	HQGVmVGmGQK	R	D	0.95	34.5	36.9	0	2	m5: Oxidation (+15.99), m8: Oxidation (+15.99)	602.216	1202.42	1203.56	2	-0.1381	-114.8	41	51	FALSE	gi|62473515,gi|62473526,gi|24639997,gi|17975540,gi|17530805,gi|17137090,gi|24646579
Actin 57B CG10067-PA, isoform A [Drosophila melanogaster]	gi|17647135	41817.9	0.5	1	2	54	0.000253	0.423	FALSE	S_G2.5573.5573.3.dta	VAPEEHPVLLTEAPLNPK	R	A	0.95	34.5	36.3	0	2		651.889	1952.64	1954.07	3	-0.4146	-212.2	97	114	FALSE	gi|62473515,gi|62473526,gi|24639997,gi|17975540,gi|17530805,gi|17137090,gi|24646579
Calpain-A CG7563-PC, isoform C [Drosophila melanogaster]	gi|161077258,gi|17137010	93947.4	0.992	1	1	2	9.36e-06	0.0254	TRUE	S_E911.2576.2576.3.dta	VFSETQNNmEENDDHVGYGGK	R	A	0.95	34.5	36	0	2	m9: Oxidation (+15.99)	796.159	2385.45	2385.99	3	0.472	197.8	544	564	TRUE
CG9921 CG9921-PA [Drosophila melanogaster]	gi|18860015	11395.6	0.5	1	1	8	3.74e-05	0.127	TRUE	S_A2Dros.2984.2984.2.dta	QDLGPVAEVETTK	R	E	0.95	34.5	36.9	0	2		694.564	1387.11	1386.71	2	1.409	1015	21	33	TRUE
terribly reduced optic lobes CG33950-PG, isoform G [Drosophila melanogaster]	gi|161077537	459070	0.5	1	1	4	1.87e-05	0.256	FALSE	S_F2.5312.5312.2.dta	LEIPNIR	R	V	0.95	34.5	35.4	0	2		427.741	853.467	854.51	2	-0.03563	-41.7	1095	1101	FALSE	gi|78706474
terribly reduced optic lobes CG33950-PG, isoform G [Drosophila melanogaster]	gi|161077537	459070	0.5	1	1	4	1.87e-05	0.256	FALSE	S_G1.3492.3492.2.dta	GSGRPVNGPDVIITGNR	R	F	0.95	34.5	36.6	0	2		855.099	1708.18	1708.91	2	0.2798	163.7	1480	1496	FALSE	gi|78706474
CG31233 CG31233-PA [Drosophila melanogaster]	gi|28571792	106842	0.5	1	1	1	4.68e-06	0.0084	TRUE	A2.2183.2183.2.dta	AEFTITIK	R	H	0.95	34.5	36	0	2		462.166	922.317	922.525	2	0.7994	865.8	208	215	TRUE
Myosin heavy chain CG17927-PK, isoform K [Drosophila melanogaster]	gi|24584712	221394	0.993	1	1	1	4.68e-06	0.52	FALSE	S_E9.4659.4659.3.dta	NLEHDLDNLR	R	E	0.95	34.5	36.1	0	2		413.459	1237.35	1238.61	3	-0.2504	-202.2	1334	1343	FALSE	gi|24584704,gi|24584700,gi|28574239,gi|24584706,gi|24584710,gi|24584702,gi|24584698
Myosin heavy chain CG17927-PK, isoform K [Drosophila melanogaster]	gi|24584712	221394	0.993	1	1	1	4.68e-06	0.52	FALSE	A9.1095.1095.3.dta	QLQHTLNEVQSK	K	L	0.95	34.5	36.3	0	2		475.534	1423.58	1424.75	3	-0.1643	-115.3	1250	1261	FALSE	gi|24584704,gi|24584700,gi|28574239,gi|24584706,gi|24584710,gi|24584702,gi|24584698
Myosin heavy chain CG17927-PK, isoform K [Drosophila melanogaster]	gi|24584712	221394	0.993	1	1	1	4.68e-06	0.52	FALSE	S_F1.6693.6693.3.dta	QIEEAEEIAALNLAK	R	F	0.95	34.5	36.6	0	2		547.758	1640.25	1641.87	3	-0.6128	-373.4	1880	1894	FALSE	gi|24584704,gi|24584700,gi|28574239,gi|24584706,gi|24584710,gi|24584702,gi|24584698
Myosin heavy chain CG17927-PK, isoform K [Drosophila melanogaster]	gi|24584712	221394	0.993	1	1	1	4.68e-06	0.52	FALSE	S_F8.4743.4743.2.dta	DLLQQVNPPK	K	Y	0.95	34.5	36.2	0	2		576.216	1150.42	1151.64	2	-0.2192	-190.4	75	84	FALSE	gi|24584704,gi|24584700,gi|28574239,gi|24584706,gi|24584710,gi|24584702
Ecdysone-inducible gene L3 CG10160-PA [Drosophila melanogaster]	gi|17136226	35519	0.994	1	1	1	4.68e-06	0.0331	TRUE	S_F9.4594.4594.2.dta	QVVDSAYEVIK	K	L	0.95	34.5	36.5	0	2		625.796	1249.58	1250.66	2	-0.0786	-62.85	233	243	TRUE
CG5630 CG5630-PB, isoform B [Drosophila melanogaster]	gi|161078461,gi|24648574	49957.4	0.5	1	1	4	1.87e-05	0.027	TRUE	S_F4.5605.5605.2.dta	VLQYYYGTPEIK	K	F	0.95	34.5	36.6	0	2		737.256	1472.5	1473.76	2	-0.2584	-175.4	178	189	TRUE
Myosin heavy chain CG17927-PD, isoform D [Drosophila melanogaster]	gi|24584702,gi|24584706	224480	0.994	1	1	38	0.000178	0.544	FALSE	S_E9.4659.4659.3.dta	NLEHDLDNLR	R	E	0.95	34.5	36.1	0	2		413.459	1237.35	1238.61	3	-0.2504	-202.2	1334	1343	FALSE	gi|24584704,gi|24584700,gi|28574239,gi|24584710,gi|24584712,gi|24584698
Myosin heavy chain CG17927-PD, isoform D [Drosophila melanogaster]	gi|24584702,gi|24584706	224480	0.994	1	1	38	0.000178	0.544	FALSE	A9.1095.1095.3.dta	QLQHTLNEVQSK	K	L	0.95	34.5	36.3	0	2		475.534	1423.58	1424.75	3	-0.1643	-115.3	1250	1261	FALSE	gi|24584704,gi|24584700,gi|28574239,gi|24584710,gi|24584712,gi|24584698
Myosin heavy chain CG17927-PD, isoform D [Drosophila melanogaster]	gi|24584702,gi|24584706	224480	0.994	1	1	38	0.000178	0.544	FALSE	S_F1.6869.6869.2.dta	FDLAPENEF	R	-	0.95	34.5	36.1	0	2		541.136	1080.26	1081.48	2	-0.2196	-203.1	1954	1962	FALSE	gi|24584704,gi|24584700,gi|28574239,gi|24584710,gi|24584698
Myosin heavy chain CG17927-PD, isoform D [Drosophila melanogaster]	gi|24584702,gi|24584706	224480	0.994	1	1	38	0.000178	0.544	FALSE	S_F1.6693.6693.3.dta	QIEEAEEIAALNLAK	R	F	0.95	34.5	36.6	0	2		547.758	1640.25	1641.87	3	-0.6128	-373.4	1880	1894	FALSE	gi|24584704,gi|24584700,gi|28574239,gi|24584710,gi|24584712,gi|24584698
Myosin heavy chain CG17927-PD, isoform D [Drosophila melanogaster]	gi|24584702,gi|24584706	224480	0.994	1	1	38	0.000178	0.544	FALSE	S_F8.4743.4743.2.dta	DLLQQVNPPK	K	Y	0.95	34.5	36.2	0	2		576.216	1150.42	1151.64	2	-0.2192	-190.4	75	84	FALSE	gi|24584704,gi|24584700,gi|28574239,gi|24584710,gi|24584712
Myosin heavy chain CG17927-PA, isoform A [Drosophila melanogaster]	gi|24584704,gi|28574239	224597	1	128	186	2330	0.0109	0.549	TRUE	S_A9Dros.1373.1373.2.dta	YQQQLK	R	D	0.95	34.6	36.7	0	2		404.253	806.491	807.437	2	0.0619	76.66	1645	1650	TRUE	gi|24584700,gi|24584706,gi|24584710,gi|24584702,gi|24584712,gi|24584698
Myosin heavy chain CG17927-PA, isoform A [Drosophila melanogaster]	gi|24584704,gi|28574239	224597	1	128	186	2330	0.0109	0.549	TRUE	S_F9.5663.5663.2.dta	EGYLLGEIK	K	A	0.95	34.6	36.6	0	2		511.222	1020.43	1021.56	2	-0.1217	-119.2	45	53	TRUE	gi|24584700,gi|24584706,gi|24584710,gi|24584702,gi|24584712,gi|24584698
Myosin heavy chain CG17927-PA, isoform A [Drosophila melanogaster]	gi|24584704,gi|28574239	224597	1	128	186	2330	0.0109	0.549	TRUE	S_A5Dros.2882.2882.2.dta	DLLQQVNPPK	K	Y	0.95	34.6	36.1	0	2		576.122	1150.23	1151.64	2	-0.407	-353.5	75	84	TRUE	gi|24584700,gi|24584706,gi|24584710,gi|24584702,gi|24584712
Myosin heavy chain CG17927-PA, isoform A [Drosophila melanogaster]	gi|24584704,gi|28574239	224597	1	128	186	2330	0.0109	0.549	TRUE	S_A12Dros.2148.2148.2.dta	AQQELEEAEER	K	A	0.95	34.6	36.8	0	2		666.713	1331.41	1331.61	2	0.8097	607.7	1898	1908	TRUE	gi|24584700,gi|24584706,gi|24584710,gi|24584702,gi|24584712,gi|24584698
Myosin heavy chain CG17927-PA, isoform A [Drosophila melanogaster]	gi|24584704,gi|28574239	224597	1	128	186	2330	0.0109	0.549	TRUE	A10.3884.3884.2.dta	NKDPLNDTVVDQFK	K	K	0.95	34.6	36.5	0	2		816.791	1631.57	1632.82	2	-0.2499	-153.1	597	610	TRUE	gi|24584700,gi|24584706,gi|24584710,gi|24584702,gi|24584712,gi|24584698
Myosin heavy chain CG17927-PA, isoform A [Drosophila melanogaster]	gi|24584704,gi|28574239	224597	1	128	186	2330	0.0109	0.549	TRUE	A10.3867.3867.2.dta	NKDPLNDTVVDQFK	K	K	0.95	34.6	36.7	0	2		817.524	1633.03	1632.82	2	1.216	744.1	597	610	TRUE	gi|24584700,gi|24584706,gi|24584710,gi|24584702,gi|24584712,gi|24584698
Myosin heavy chain CG17927-PA, isoform A [Drosophila melanogaster]	gi|24584704,gi|28574239	224597	1	128	186	2330	0.0109	0.549	TRUE	S_E912.6576.6576.2.dta	ATSVRPQFDGLAFPPR	R	F	0.95	34.6	36.4	0	2		880.446	1758.88	1758.93	2	0.9544	542.3	1938	1953	TRUE	gi|24584700,gi|24584706,gi|24584710,gi|24584702,gi|24584698
sallimus CG1915-PC, isoform C [Drosophila melanogaster]	gi|161080703	2.06604e+06	1	83	86	363	0.0017	0.0614	TRUE	S_F8.3066.3066.2.dta	EELVTEDEQPNPPK	R	F	0.95	34.6	36.3	0	2		813.428	1624.84	1624.77	2	1.077	662.3	3664	3677	TRUE
sallimus CG1915-PC, isoform C [Drosophila melanogaster]	gi|161080703	2.06604e+06	1	83	86	363	0.0017	0.0614	TRUE	A10.2166.2166.2.dta	ATNQLGEAVNTcNVR	K	V	0.95	34.6	36.5	0	2	c12: Carbamidomethyl (+57.02)	823.887	1645.76	1646.79	2	-0.02538	-15.41	2166	2180	TRUE
CG32702 CG32702-PA [Drosophila melanogaster]	gi|24640838	411066	1	55	57	276	0.00129	0.175	TRUE	A12.2124.2124.2.dta	SDYVELR	R	D	0.95	34.6	35.1	0	2		441.795	881.575	881.437	2	1.146	1298	3244	3250	TRUE
CG32702 CG32702-PA [Drosophila melanogaster]	gi|24640838	411066	1	55	57	276	0.00129	0.175	TRUE	S_E9.3800.3800.2.dta	LcGSSEITLSADGTK	R	E	0.95	34.6	36.6	0	2	c2: Carbamidomethyl (+57.02)	770.376	1538.74	1538.74	2	1.007	654.1	3304	3318	TRUE
Papilin CG33103-PA, isoform A [Drosophila melanogaster]	gi|28572036	312636	1	51	58	438	0.00205	0.228	TRUE	A10.2125.2125.2.dta	DDVPLYNNER	K	V	0.95	34.6	36.9	0	2		617.574	1233.13	1234.57	2	-0.4308	-349.1	2790	2799	TRUE
Papilin CG33103-PA, isoform A [Drosophila melanogaster]	gi|28572036	312636	1	51	58	438	0.00205	0.228	TRUE	S_G1.2560.2560.3.dta	QPDPAPTVAQcSQPADPGQcDK	R	W	0.95	34.6	35.9	1.96	2	c11: Carbamidomethyl (+57.02), c20: Carbamidomethyl (+57.02)	789.911	2366.71	2367.03	3	0.6816	287.9	1991	2012	TRUE
Laminin A CG10236-PA [Drosophila melanogaster]	gi|17136292	411103	1	44	48	274	0.00128	0.16	TRUE	S_E912.5034.5034.3.dta	SGYLEGSQNILHVDK	K	N	0.95	34.6	36.5	1.38	2		554.297	1659.87	1659.83	3	1.04	626.3	2794	2808	TRUE
zormin CG33484-PD, isoform D [Drosophila melanogaster]	gi|116007762	411353	1	35	37	226	0.00106	0.131	TRUE	S_A11Dros.2318.2318.2.dta	SSQSSVEIIER	R	H	0.95	34.6	36.7	0	2		617.684	1233.35	1234.63	2	-0.2672	-216.5	1900	1910	TRUE
Calcium ATPase at 60A CG3725-PA, isoform A [Drosophila melanogaster]	gi|17136664,gi|24762445,gi|24762447,gi|24762449,gi|24762451,gi|24762453,gi|24762455,gi|24762457	109596	1	34	42	581	0.00272	0.346	TRUE	S_A8Dros.3100.3100.2.dta	EVFDSIVR	K	C	0.95	34.6	36.3	0	2		483.194	964.373	964.51	2	0.8701	901.3	606	613	TRUE
alpha actinin CG4376-PC, isoform C [Drosophila melanogaster]	gi|17137758	106358	1	31	34	241	0.00113	0.381	TRUE	S_F912.4530.4530.1.dta	ALDFIASK	K	G	0.95	34.6	36.9	0	2		864.556	863.548	864.483	1	0.07235	83.68	99	106	TRUE
Cytochrome P450-4g1 CG3972-PA [Drosophila melanogaster]	gi|17933498	62954.7	1	24	31	601	0.00281	0.39	TRUE	S_E9.3820.3820.2.dta	DDLDDIDENDVGAK	R	R	0.95	34.6	36.5	0	2		767.322	1532.63	1533.66	2	-0.01942	-12.67	308	321	TRUE
Fat body protein 1 CG17285-PA, isoform A [Drosophila melanogaster]	gi|24664081,gi|24664085	119646	1	22	30	257	0.0012	0.244	TRUE	A5.3109.3109.2.dta	IFLGPAEDQQGR	R	Q	0.95	34.6	36.9	0	2		665.741	1329.47	1330.68	2	-0.2021	-151.9	857	868	TRUE
Fat body protein 1 CG17285-PA, isoform A [Drosophila melanogaster]	gi|24664081,gi|24664085	119646	1	22	30	257	0.0012	0.244	TRUE	S_A10Dros.3138.3138.2.dta	QVLAQIGQIEQR	R	I	0.95	34.6	36.6	0	2		692.263	1382.51	1382.78	2	0.7417	536.1	674	685	TRUE
upheld CG7107-PF, isoform F [Drosophila melanogaster]	gi|62473664	47113.5	1	17	23	236	0.0011	0.405	TRUE	S_F4.4643.4643.2.dta	DAGLGLSSAAMER	K	N	0.95	34.6	36.6	0	2		639.633	1277.25	1277.62	2	0.6414	501.8	149	161	TRUE	gi|62473654
ATP synthase-beta CG11154-PA, isoform A [Drosophila melanogaster]	gi|24638766	54091	1	17	26	585	0.00274	0.457	TRUE	S_E912.7313.7313.2.dta	AIAELGIYPAVDPLDSTSR	R	I	0.95	34.6	36.3	0	2		994.418	1986.82	1988.03	2	-0.2066	-103.9	365	383	TRUE
CG6206 CG6206-PA, isoform A [Drosophila melanogaster]	gi|19921088	122670	1	16	18	68	0.000318	0.181	TRUE	S_F5.4395.4395.2.dta	IPVPYSNYR	R	I	0.95	34.6	36.2	0	2		554.754	1107.49	1108.58	2	-0.07841	-70.74	520	528	TRUE
pericardin CG5700-PB [Drosophila melanogaster]	gi|24663043	163475	1	14	18	215	0.00101	0.114	TRUE	S_E911.2943.2945.3.dta	VGQPGYGTQTGQIGAPGR	R	Y	0.95	34.6	36.5	0	2		582.262	1743.76	1743.88	3	0.8932	511.9	1200	1217	TRUE
Aldolase CG6058-PF, isoform F [Drosophila melanogaster]	gi|24650276,gi|24650278,gi|24650280,gi|24650282,gi|24650288,gi|45551983,gi|45551985,gi|45553577	42712.7	1	14	14	57	0.000267	0.431	TRUE	S_F9.5033.5033.2.dta	GIILGIK	K	V	0.95	34.6	35.8	0	2		357.279	712.543	713.493	2	0.05768	80.84	135	141	TRUE
v(2)k05816 CG3524-PA [Drosophila melanogaster]	gi|24581345	265857	1	13	13	30	0.00014	0.0793	TRUE	S_G2.7532.7532.2.dta	SDSGFLLLEEAASR	K	Y	0.95	34.6	36.1	0	2		747.9	1493.78	1494.74	2	0.04757	31.82	1269	1282	TRUE
CG30084 CG30084-PF, isoform F [Drosophila melanogaster]	gi|161077121,gi|78709100	238039	1	12	13	100	0.000468	0.0702	TRUE	S_F2.6314.6314.2.dta	FDAQPWGFR	R	L	0.95	34.6	36	0	2		562.263	1122.51	1123.53	2	-0.01414	-12.58	14	22	TRUE	gi|78707228,gi|116007706
CG12262 CG12262-PA [Drosophila melanogaster]	gi|24660351	45854.8	1	12	13	112	0.000524	0.363	TRUE	S_F9.3254.3254.2.dta	TRPPVAAGAVGLAQR	K	C	0.95	34.6	36.4	0	2		732.398	1462.78	1463.84	2	-0.05713	-39.03	276	290	TRUE
lethal (2) 44DEa CG8732-PD, isoform D [Drosophila melanogaster]	gi|22026970,gi|24586634,gi|24586636,gi|62471679,gi|62471681,gi|62471683,gi|62471685,gi|62471687,gi|62471689	80601.5	1	12	12	107	0.000501	0.24	TRUE	S_G2.4058.4058.2.dta	mLQENIDTLEK	K	V	0.95	34.6	36.7	0	2	m1: Oxidation (+15.99)	675.269	1348.52	1349.66	2	-0.1328	-98.43	81	91	TRUE
CG6455 CG6455-PA, isoform A [Drosophila melanogaster]	gi|45549224	93596.6	1	11	11	49	0.000229	0.156	TRUE	S_A10Dros.1155.1155.3.dta	RPSKPSEVSK	K	T	0.95	34.6	36.8	0	2		372.127	1113.36	1114.62	3	-0.2566	-230.3	286	295	TRUE
coracle CG11949-PA, isoform A [Drosophila melanogaster]	gi|24655527	184153	1	8	10	43	0.000201	0.073	TRUE	S_F9.2435.2435.3.dta	PAEIKPSAPAEPETPTK	M	S	0.95	34.6	36.5	0	2		588.675	1763	1762.92	3	1.086	615.4	2	18	TRUE
CG1640 CG1640-PA, isoform A [Drosophila melanogaster]	gi|24641760,gi|24641764,gi|24641766,gi|24641768,gi|24641770,gi|45551451	63111.8	1	8	8	25	0.000117	0.173	TRUE	A10.2451.2451.2.dta	GYLGEcGIR	K	G	0.95	34.6	35.8	0	2	c6: Carbamidomethyl (+57.02)	513.341	1024.67	1024.49	2	1.186	1156	387	395	TRUE
Chorion protein 36 CG1478-PA [Drosophila melanogaster]	gi|17530857	29897.1	1	7	8	33	0.000154	0.327	TRUE	S_E7.6687.6687.2.dta	IEAPLAPVVAPVYSQPR	K	E	0.95	34.6	36.5	0	2		904.38	1806.74	1807.01	2	0.7398	409.2	221	237	TRUE
Limpet CG32171-PB, isoform B [Drosophila melanogaster]	gi|21356031,gi|24665611,gi|45553163,gi|45553165	63655.6	1	7	9	62	0.00029	0.172	TRUE	S_F911.4606.4606.2.dta	FISFEDR	R	H	0.95	34.6	37	0	2		457.827	913.638	913.442	2	1.203	1316	514	520	TRUE
Glutamine synthetase 1 CG2718-PB, isoform B [Drosophila melanogaster]	gi|17136208,gi|24580558	44378.7	1	7	8	32	0.00015	0.233	TRUE	S_F9.4639.4639.3.dta	NDVIVLcDTYSADGKPTASNK	K	R	0.95	34.6	36.2	0	2	c7: Carbamidomethyl (+57.02)	756.993	2267.96	2268.08	3	0.8814	388.5	130	150	TRUE
Troponin C at 73F CG7930-PA, isoform A [Drosophila melanogaster]	gi|24665772	17678.5	1	5	5	40	0.000187	0.381	TRUE	S_F6.3594.3595.2.dta	FIVEEDAEAmQK	K	E	0.95	34.6	36.6	0	2	m10: Oxidation (+15.99)	713.423	1424.83	1425.66	2	0.1804	126.5	79	90	TRUE
short stop CG18076-PH, isoform H [Drosophila melanogaster]	gi|24653497	989546	1	5	5	5	2.34e-05	0.00863	TRUE	S_E912.6380.6380.2.dta	GGILSPLSTGSSGFGSR	K	R	0.95	34.6	36.5	0	2		790.772	1579.53	1579.81	2	0.7285	460.9	5627	5643	TRUE
CG32230 CG32230-PA, isoform A [Drosophila melanogaster]	gi|24668874,gi|24668878	9416	1	4	5	45	0.000211	0.361	TRUE	S_F5.4557.4558.2.dta	mQGLGLQSLK	-	K	0.95	34.6	36.8	0	2	m1: Oxidation (+15.99)	546.484	1090.95	1090.59	2	1.366	1251	1	10	TRUE
CG11314 CG11314-PA [Drosophila melanogaster]	gi|24651498	17433.1	1	4	4	15	7.02e-05	0.333	TRUE	S_F5.5548.5548.2.dta	ccFTIDIK	R	V	0.95	34.6	36.9	0	2	c1: Carbamidomethyl (+57.02), c2: Carbamidomethyl (+57.02)	529.124	1056.23	1056.49	2	0.7546	713.8	149	156	TRUE	gi|21358239
regucalcin CG1803-PC, isoform C [Drosophila melanogaster]	gi|18860103,gi|24641469,gi|24641471,gi|45551448	33626.8	1	3	3	5	2.34e-05	0.125	TRUE	S_A6Dros.3156.3156.2.dta	VTGLNATGYPGVNLK	K	-	0.95	34.6	36.9	0	2		752.166	1502.32	1503.82	2	-0.4936	-328.3	288	302	TRUE
Rpn2 CG11888-PA [Drosophila melanogaster]	gi|24650984	113184	1	3	3	11	5.15e-05	0.0373	TRUE	S_G1.6907.6907.2.dta	EAIALLEPMVK	R	F	0.95	34.6	36.7	0	2		607.135	1212.25	1213.69	2	-0.4243	-349.7	682	692	TRUE
Microsomal glutathione S-transferase-like CG1742-PA, isoform A [Drosophila melanogaster]	gi|24643618	16849.7	1	3	3	34	0.000159	0.23	TRUE	S_F4.5819.5819.2.dta	TFANPEDLMSPK	K	L	0.95	34.6	36.7	0	2		675.261	1348.51	1349.64	2	-0.1266	-93.83	45	56	TRUE
CHOp24 CG3564-PA [Drosophila melanogaster]	gi|18921123	23245	1	3	4	8	3.74e-05	0.159	TRUE	S_F6.3966.3966.2.dta	GTYTVcFNNER	K	S	0.95	34.6	36.7	0	2	c6: Carbamidomethyl (+57.02)	680.797	1359.58	1360.6	2	-0.01009	-7.416	92	102	TRUE
Roe1 CG6155-PA [Drosophila melanogaster]	gi|24653432	23908.9	1	3	3	8	3.74e-05	0.16	TRUE	S_E6.4066.4066.2.dta	HGLEPLDPINQK	R	F	0.95	34.6	36.7	0	2		680.834	1359.65	1360.72	2	-0.06312	-46.39	155	166	TRUE
His2B:CG17949 CG17949-PA [Drosophila melanogaster]	gi|24585671,gi|78706956,gi|78706964,gi|78706972,gi|78706982,gi|78706990,gi|78707000,gi|78707010,gi|78707020,gi|78707030,gi|78707040,gi|78707050,gi|78707060,gi|78707070,gi|78707080,gi|78707090,gi|78707100,gi|78707110,gi|78707120,gi|78707130,gi|78707140,gi|78707150,gi|78707160	13678.7	1	3	4	20	9.36e-05	0.236	TRUE	S_F5.5717.5717.2.dta	LLLPGELAK	R	H	0.95	34.6	35.6	0	2		477.3	952.585	953.604	2	-0.01133	-11.88	98	106	TRUE
Ribosomal protein L23A CG7977-PA [Drosophila melanogaster]	gi|24655502	29447	1	3	3	44	0.000206	0.101	TRUE	S_F5.4787.4787.2.dta	MDAYNIIK	R	Y	0.95	34.6	35.8	0	2		484.276	966.537	967.492	2	0.05209	53.83	192	199	TRUE
CG5009 CG5009-PA [Drosophila melanogaster]	gi|24654595	74271.1	1	3	3	7	3.28e-05	0.0628	TRUE	S_F911.5061.5061.2.dta	FIDLTDQDVTK	R	L	0.95	34.6	36.4	0	2		647.809	1293.6	1294.65	2	-0.04272	-33	584	594	TRUE
Dipeptidyl aminopeptidase III CG7415-PC, isoform C [Drosophila melanogaster]	gi|24645047,gi|24645049	89179.4	0.998	2	2	4	1.87e-05	0.0293	TRUE	S_E911.5405.5405.2.dta	VLLEAGEGLVK	K	V	0.95	34.6	36.4	0	2		564.304	1126.59	1127.67	2	-0.06732	-59.7	636	646	TRUE
Myosin heavy chain CG17927-PF, isoform F [Drosophila melanogaster]	gi|24584700	224516	0.998	2	2	20	9.36e-05	0.548	FALSE	S_A9Dros.1373.1373.2.dta	YQQQLK	R	D	0.95	34.6	36.7	0	2		404.253	806.491	807.437	2	0.0619	76.66	1645	1650	FALSE	gi|24584704,gi|28574239,gi|24584706,gi|24584710,gi|24584702,gi|24584712,gi|24584698
Myosin heavy chain CG17927-PF, isoform F [Drosophila melanogaster]	gi|24584700	224516	0.998	2	2	20	9.36e-05	0.548	FALSE	S_F9.5663.5663.2.dta	EGYLLGEIK	K	A	0.95	34.6	36.6	0	2		511.222	1020.43	1021.56	2	-0.1217	-119.2	45	53	FALSE	gi|24584704,gi|28574239,gi|24584706,gi|24584710,gi|24584702,gi|24584712,gi|24584698
Myosin heavy chain CG17927-PF, isoform F [Drosophila melanogaster]	gi|24584700	224516	0.998	2	2	20	9.36e-05	0.548	FALSE	S_A5Dros.2882.2882.2.dta	DLLQQVNPPK	K	Y	0.95	34.6	36.1	0	2		576.122	1150.23	1151.64	2	-0.407	-353.5	75	84	FALSE	gi|24584704,gi|28574239,gi|24584706,gi|24584710,gi|24584702,gi|24584712
Myosin heavy chain CG17927-PF, isoform F [Drosophila melanogaster]	gi|24584700	224516	0.998	2	2	20	9.36e-05	0.548	FALSE	S_A12Dros.2148.2148.2.dta	AQQELEEAEER	K	A	0.95	34.6	36.8	0	2		666.713	1331.41	1331.61	2	0.8097	607.7	1898	1908	FALSE	gi|24584704,gi|28574239,gi|24584706,gi|24584710,gi|24584702,gi|24584712,gi|24584698
Myosin heavy chain CG17927-PF, isoform F [Drosophila melanogaster]	gi|24584700	224516	0.998	2	2	20	9.36e-05	0.548	FALSE	A10.3884.3884.2.dta	NKDPLNDTVVDQFK	K	K	0.95	34.6	36.5	0	2		816.791	1631.57	1632.82	2	-0.2499	-153.1	597	610	FALSE	gi|24584704,gi|28574239,gi|24584706,gi|24584710,gi|24584702,gi|24584712,gi|24584698
Myosin heavy chain CG17927-PF, isoform F [Drosophila melanogaster]	gi|24584700	224516	0.998	2	2	20	9.36e-05	0.548	FALSE	A10.3867.3867.2.dta	NKDPLNDTVVDQFK	K	K	0.95	34.6	36.7	0	2		817.524	1633.03	1632.82	2	1.216	744.1	597	610	FALSE	gi|24584704,gi|28574239,gi|24584706,gi|24584710,gi|24584702,gi|24584712,gi|24584698
Myosin heavy chain CG17927-PF, isoform F [Drosophila melanogaster]	gi|24584700	224516	0.998	2	2	20	9.36e-05	0.548	FALSE	S_E912.6576.6576.2.dta	ATSVRPQFDGLAFPPR	R	F	0.95	34.6	36.4	0	2		880.446	1758.88	1758.93	2	0.9544	542.3	1938	1953	FALSE	gi|24584704,gi|28574239,gi|24584706,gi|24584710,gi|24584702,gi|24584698
Myosin heavy chain CG17927-PB, isoform B [Drosophila melanogaster]	gi|24584710	224397	0.998	2	2	9	4.21e-05	0.534	FALSE	S_A9Dros.1373.1373.2.dta	YQQQLK	R	D	0.95	34.6	36.7	0	2		404.253	806.491	807.437	2	0.0619	76.66	1645	1650	FALSE	gi|24584704,gi|24584700,gi|28574239,gi|24584706,gi|24584702,gi|24584712,gi|24584698
Myosin heavy chain CG17927-PB, isoform B [Drosophila melanogaster]	gi|24584710	224397	0.998	2	2	9	4.21e-05	0.534	FALSE	S_F9.5663.5663.2.dta	EGYLLGEIK	K	A	0.95	34.6	36.6	0	2		511.222	1020.43	1021.56	2	-0.1217	-119.2	45	53	FALSE	gi|24584704,gi|24584700,gi|28574239,gi|24584706,gi|24584702,gi|24584712,gi|24584698
Myosin heavy chain CG17927-PB, isoform B [Drosophila melanogaster]	gi|24584710	224397	0.998	2	2	9	4.21e-05	0.534	FALSE	S_A5Dros.2882.2882.2.dta	DLLQQVNPPK	K	Y	0.95	34.6	36.1	0	2		576.122	1150.23	1151.64	2	-0.407	-353.5	75	84	FALSE	gi|24584704,gi|24584700,gi|28574239,gi|24584706,gi|24584702,gi|24584712
Myosin heavy chain CG17927-PB, isoform B [Drosophila melanogaster]	gi|24584710	224397	0.998	2	2	9	4.21e-05	0.534	FALSE	S_A12Dros.2148.2148.2.dta	AQQELEEAEER	K	A	0.95	34.6	36.8	0	2		666.713	1331.41	1331.61	2	0.8097	607.7	1898	1908	FALSE	gi|24584704,gi|24584700,gi|28574239,gi|24584706,gi|24584702,gi|24584712,gi|24584698
Myosin heavy chain CG17927-PB, isoform B [Drosophila melanogaster]	gi|24584710	224397	0.998	2	2	9	4.21e-05	0.534	FALSE	A10.3884.3884.2.dta	NKDPLNDTVVDQFK	K	K	0.95	34.6	36.5	0	2		816.791	1631.57	1632.82	2	-0.2499	-153.1	597	610	FALSE	gi|24584704,gi|24584700,gi|28574239,gi|24584706,gi|24584702,gi|24584712,gi|24584698
Myosin heavy chain CG17927-PB, isoform B [Drosophila melanogaster]	gi|24584710	224397	0.998	2	2	9	4.21e-05	0.534	FALSE	A10.3867.3867.2.dta	NKDPLNDTVVDQFK	K	K	0.95	34.6	36.7	0	2		817.524	1633.03	1632.82	2	1.216	744.1	597	610	FALSE	gi|24584704,gi|24584700,gi|28574239,gi|24584706,gi|24584702,gi|24584712,gi|24584698
Myosin heavy chain CG17927-PB, isoform B [Drosophila melanogaster]	gi|24584710	224397	0.998	2	2	9	4.21e-05	0.534	FALSE	S_E912.6576.6576.2.dta	ATSVRPQFDGLAFPPR	R	F	0.95	34.6	36.4	0	2		880.446	1758.88	1758.93	2	0.9544	542.3	1938	1953	FALSE	gi|24584704,gi|24584700,gi|28574239,gi|24584706,gi|24584702,gi|24584698
CG1458 CG1458-PA [Drosophila melanogaster]	gi|21358227	14615	0.998	2	2	48	0.000225	0.188	TRUE	S_A5Dros.3218.3218.2.dta	VVDmIDVEDIAEK	K	A	0.95	34.6	36.5	0	2	m4: Oxidation (+15.99)	746.653	1491.29	1491.73	2	0.573	383.9	84	96	TRUE
Myosin heavy chain CG17927-PJ, isoform J [Drosophila melanogaster]	gi|24584698	224394	0.998	2	2	3	1.4e-05	0.541	FALSE	S_A9Dros.1373.1373.2.dta	YQQQLK	R	D	0.95	34.6	36.7	0	2		404.253	806.491	807.437	2	0.0619	76.66	1643	1648	FALSE	gi|24584704,gi|24584700,gi|28574239,gi|24584706,gi|24584710,gi|24584702,gi|24584712
Myosin heavy chain CG17927-PJ, isoform J [Drosophila melanogaster]	gi|24584698	224394	0.998	2	2	3	1.4e-05	0.541	FALSE	S_F9.5663.5663.2.dta	EGYLLGEIK	K	A	0.95	34.6	36.6	0	2		511.222	1020.43	1021.56	2	-0.1217	-119.2	45	53	FALSE	gi|24584704,gi|24584700,gi|28574239,gi|24584706,gi|24584710,gi|24584702,gi|24584712
Myosin heavy chain CG17927-PJ, isoform J [Drosophila melanogaster]	gi|24584698	224394	0.998	2	2	3	1.4e-05	0.541	FALSE	S_A12Dros.2148.2148.2.dta	AQQELEEAEER	K	A	0.95	34.6	36.8	0	2		666.713	1331.41	1331.61	2	0.8097	607.7	1896	1906	FALSE	gi|24584704,gi|24584700,gi|28574239,gi|24584706,gi|24584710,gi|24584702,gi|24584712
Myosin heavy chain CG17927-PJ, isoform J [Drosophila melanogaster]	gi|24584698	224394	0.998	2	2	3	1.4e-05	0.541	FALSE	A10.3884.3884.2.dta	NKDPLNDTVVDQFK	K	K	0.95	34.6	36.5	0	2		816.791	1631.57	1632.82	2	-0.2499	-153.1	595	608	FALSE	gi|24584704,gi|24584700,gi|28574239,gi|24584706,gi|24584710,gi|24584702,gi|24584712
Myosin heavy chain CG17927-PJ, isoform J [Drosophila melanogaster]	gi|24584698	224394	0.998	2	2	3	1.4e-05	0.541	FALSE	A10.3867.3867.2.dta	NKDPLNDTVVDQFK	K	K	0.95	34.6	36.7	0	2		817.524	1633.03	1632.82	2	1.216	744.1	595	608	FALSE	gi|24584704,gi|24584700,gi|28574239,gi|24584706,gi|24584710,gi|24584702,gi|24584712
Myosin heavy chain CG17927-PJ, isoform J [Drosophila melanogaster]	gi|24584698	224394	0.998	2	2	3	1.4e-05	0.541	FALSE	S_E912.6576.6576.2.dta	ATSVRPQFDGLAFPPR	R	F	0.95	34.6	36.4	0	2		880.446	1758.88	1758.93	2	0.9544	542.3	1936	1951	FALSE	gi|24584704,gi|24584700,gi|28574239,gi|24584706,gi|24584710,gi|24584702
Ribosomal protein S15 CG8332-PA, isoform A [Drosophila melanogaster]	gi|19922390,gi|24654191	17019.9	0.998	2	2	6	2.81e-05	0.0878	TRUE	A4.1142.1142.2.dta	EAPPNEKPEIVK	K	T	0.95	34.6	36.5	0	2		675.765	1349.51	1350.73	2	-0.2054	-152.1	69	80	TRUE
Glyceraldehyde 3 phosphate dehydrogenase 2 CG8893-PB, isoform B [Drosophila melanogaster]	gi|17933600,gi|18110149	35351.9	0.5	1	1	12	5.61e-05	0.274	TRUE	S_E5.3254.3254.2.dta	GAAQNIIPASTGAAK	R	A	0.95	34.6	36.5	0	2		685.812	1369.61	1369.74	2	0.8724	636.5	198	212	TRUE
upheld CG7107-PG, isoform G [Drosophila melanogaster]	gi|62473654	47331.6	0.986	1	1	1	4.68e-06	0.407	FALSE	S_F4.4643.4643.2.dta	DAGLGLSSAAMER	K	N	0.95	34.6	36.6	0	2		639.633	1277.25	1277.62	2	0.6414	501.8	152	164	FALSE	gi|62473664
CG30084 CG30084-PG, isoform G [Drosophila melanogaster]	gi|116007706,gi|78707228	95990.3	0.5	1	1	1	4.68e-06	0.182	FALSE	S_F2.6314.6314.2.dta	FDAQPWGFR	R	L	0.95	34.6	36	0	2		562.263	1122.51	1123.53	2	-0.01414	-12.58	14	22	FALSE	gi|78709100,gi|161077121
Cyp4d20 CG16761-PA [Drosophila melanogaster]	gi|24656064	58198.1	0.989	1	1	2	9.36e-06	0.0373	TRUE	S_F910.5861.5861.2.dta	VLGPDASAPVTQAQLQDLK	R	Y	0.95	34.6	36.3	0	2		976.237	1950.46	1951.05	2	0.4161	213.2	349	367	TRUE
Myosin heavy chain CG17927-PK, isoform K [Drosophila melanogaster]	gi|24584712	221394	0.993	1	1	1	4.68e-06	0.52	FALSE	S_A9Dros.1373.1373.2.dta	YQQQLK	R	D	0.95	34.6	36.7	0	2		404.253	806.491	807.437	2	0.0619	76.66	1645	1650	FALSE	gi|24584704,gi|24584700,gi|28574239,gi|24584706,gi|24584710,gi|24584702,gi|24584698
Myosin heavy chain CG17927-PK, isoform K [Drosophila melanogaster]	gi|24584712	221394	0.993	1	1	1	4.68e-06	0.52	FALSE	S_F9.5663.5663.2.dta	EGYLLGEIK	K	A	0.95	34.6	36.6	0	2		511.222	1020.43	1021.56	2	-0.1217	-119.2	45	53	FALSE	gi|24584704,gi|24584700,gi|28574239,gi|24584706,gi|24584710,gi|24584702,gi|24584698
Myosin heavy chain CG17927-PK, isoform K [Drosophila melanogaster]	gi|24584712	221394	0.993	1	1	1	4.68e-06	0.52	FALSE	S_A5Dros.2882.2882.2.dta	DLLQQVNPPK	K	Y	0.95	34.6	36.1	0	2		576.122	1150.23	1151.64	2	-0.407	-353.5	75	84	FALSE	gi|24584704,gi|24584700,gi|28574239,gi|24584706,gi|24584710,gi|24584702
Myosin heavy chain CG17927-PK, isoform K [Drosophila melanogaster]	gi|24584712	221394	0.993	1	1	1	4.68e-06	0.52	FALSE	S_A12Dros.2148.2148.2.dta	AQQELEEAEER	K	A	0.95	34.6	36.8	0	2		666.713	1331.41	1331.61	2	0.8097	607.7	1898	1908	FALSE	gi|24584704,gi|24584700,gi|28574239,gi|24584706,gi|24584710,gi|24584702,gi|24584698
Myosin heavy chain CG17927-PK, isoform K [Drosophila melanogaster]	gi|24584712	221394	0.993	1	1	1	4.68e-06	0.52	FALSE	A10.3884.3884.2.dta	NKDPLNDTVVDQFK	K	K	0.95	34.6	36.5	0	2		816.791	1631.57	1632.82	2	-0.2499	-153.1	597	610	FALSE	gi|24584704,gi|24584700,gi|28574239,gi|24584706,gi|24584710,gi|24584702,gi|24584698
Myosin heavy chain CG17927-PK, isoform K [Drosophila melanogaster]	gi|24584712	221394	0.993	1	1	1	4.68e-06	0.52	FALSE	A10.3867.3867.2.dta	NKDPLNDTVVDQFK	K	K	0.95	34.6	36.7	0	2		817.524	1633.03	1632.82	2	1.216	744.1	597	610	FALSE	gi|24584704,gi|24584700,gi|28574239,gi|24584706,gi|24584710,gi|24584702,gi|24584698
CG11315 CG11315-PA, isoform A [Drosophila melanogaster]	gi|21358239	17534	0.5	1	1	2	9.36e-06	0.153	FALSE	S_F5.5548.5548.2.dta	ccFTIDIK	R	V	0.95	34.6	36.9	0	2	c1: Carbamidomethyl (+57.02), c2: Carbamidomethyl (+57.02)	529.124	1056.23	1056.49	2	0.7546	713.8	147	154	FALSE	gi|24651498
Myosin heavy chain CG17927-PD, isoform D [Drosophila melanogaster]	gi|24584702,gi|24584706	224480	0.994	1	1	38	0.000178	0.544	FALSE	S_A9Dros.1373.1373.2.dta	YQQQLK	R	D	0.95	34.6	36.7	0	2		404.253	806.491	807.437	2	0.0619	76.66	1645	1650	FALSE	gi|24584704,gi|24584700,gi|28574239,gi|24584710,gi|24584712,gi|24584698
Myosin heavy chain CG17927-PD, isoform D [Drosophila melanogaster]	gi|24584702,gi|24584706	224480	0.994	1	1	38	0.000178	0.544	FALSE	S_F9.5663.5663.2.dta	EGYLLGEIK	K	A	0.95	34.6	36.6	0	2		511.222	1020.43	1021.56	2	-0.1217	-119.2	45	53	FALSE	gi|24584704,gi|24584700,gi|28574239,gi|24584710,gi|24584712,gi|24584698
Myosin heavy chain CG17927-PD, isoform D [Drosophila melanogaster]	gi|24584702,gi|24584706	224480	0.994	1	1	38	0.000178	0.544	FALSE	S_A5Dros.2882.2882.2.dta	DLLQQVNPPK	K	Y	0.95	34.6	36.1	0	2		576.122	1150.23	1151.64	2	-0.407	-353.5	75	84	FALSE	gi|24584704,gi|24584700,gi|28574239,gi|24584710,gi|24584712
Myosin heavy chain CG17927-PD, isoform D [Drosophila melanogaster]	gi|24584702,gi|24584706	224480	0.994	1	1	38	0.000178	0.544	FALSE	S_A12Dros.2148.2148.2.dta	AQQELEEAEER	K	A	0.95	34.6	36.8	0	2		666.713	1331.41	1331.61	2	0.8097	607.7	1898	1908	FALSE	gi|24584704,gi|24584700,gi|28574239,gi|24584710,gi|24584712,gi|24584698
Myosin heavy chain CG17927-PD, isoform D [Drosophila melanogaster]	gi|24584702,gi|24584706	224480	0.994	1	1	38	0.000178	0.544	FALSE	A10.3884.3884.2.dta	NKDPLNDTVVDQFK	K	K	0.95	34.6	36.5	0	2		816.791	1631.57	1632.82	2	-0.2499	-153.1	597	610	FALSE	gi|24584704,gi|24584700,gi|28574239,gi|24584710,gi|24584712,gi|24584698
Myosin heavy chain CG17927-PD, isoform D [Drosophila melanogaster]	gi|24584702,gi|24584706	224480	0.994	1	1	38	0.000178	0.544	FALSE	A10.3867.3867.2.dta	NKDPLNDTVVDQFK	K	K	0.95	34.6	36.7	0	2		817.524	1633.03	1632.82	2	1.216	744.1	597	610	FALSE	gi|24584704,gi|24584700,gi|28574239,gi|24584710,gi|24584712,gi|24584698
Myosin heavy chain CG17927-PD, isoform D [Drosophila melanogaster]	gi|24584702,gi|24584706	224480	0.994	1	1	38	0.000178	0.544	FALSE	S_E912.6576.6576.2.dta	ATSVRPQFDGLAFPPR	R	F	0.95	34.6	36.4	0	2		880.446	1758.88	1758.93	2	0.9544	542.3	1938	1953	FALSE	gi|24584704,gi|24584700,gi|28574239,gi|24584710,gi|24584698
CG14977 CG14977-PA [Drosophila melanogaster]	gi|28574298	13244.6	0.5	1	1	4	1.87e-05	0.108	TRUE	S_F5.3442.3442.2.dta	EDGAVLESGGDLK	K	N	0.95	34.6	36.9	0	2		645.644	1289.27	1289.62	2	0.6569	509.1	22	34	TRUE
Myosin heavy chain CG17927-PA, isoform A [Drosophila melanogaster]	gi|24584704,gi|28574239	224597	1	128	186	2330	0.0109	0.549	TRUE	A10.3521.3521.3.dta	NLEHDLDNLR	R	E	0.95	34.7	36.1	0	2		413.532	1237.57	1238.61	3	-0.0314	-25.35	1334	1343	TRUE	gi|24584700,gi|24584706,gi|24584710,gi|24584702,gi|24584712,gi|24584698
Myosin heavy chain CG17927-PA, isoform A [Drosophila melanogaster]	gi|24584704,gi|28574239	224597	1	128	186	2330	0.0109	0.549	TRUE	S_A11Dros.1856.1856.2.dta	MQDLVDK	R	L	0.95	34.7	37	0	2		425.225	848.434	848.419	2	1.022	1204	1863	1869	TRUE	gi|24584700,gi|24584706,gi|24584710,gi|24584702,gi|24584712,gi|24584698
Myosin heavy chain CG17927-PA, isoform A [Drosophila melanogaster]	gi|24584704,gi|28574239	224597	1	128	186	2330	0.0109	0.549	TRUE	S_A8Dros.3757.3757.2.dta	FDLAPENEF	R	-	0.95	34.7	35.9	0	2		541.638	1081.26	1081.48	2	0.7842	724.6	1954	1962	TRUE	gi|24584700,gi|24584706,gi|24584710,gi|24584702,gi|24584698
Myosin heavy chain CG17927-PA, isoform A [Drosophila melanogaster]	gi|24584704,gi|28574239	224597	1	128	186	2330	0.0109	0.549	TRUE	S_E911.7067.7067.2.dta	FDLAPENEF	R	-	0.95	34.7	35.9	0	2		541.666	1081.32	1081.48	2	0.8394	775.5	1954	1962	TRUE	gi|24584700,gi|24584706,gi|24584710,gi|24584702,gi|24584698
Myosin heavy chain CG17927-PA, isoform A [Drosophila melanogaster]	gi|24584704,gi|28574239	224597	1	128	186	2330	0.0109	0.549	TRUE	S_A10Dros.4048.4048.2.dta	DLLDQIGEGGR	K	N	0.95	34.7	37	0	2		586.743	1171.47	1172.59	2	-0.1128	-96.22	1510	1520	TRUE	gi|24584700,gi|24584706,gi|24584710,gi|24584702,gi|24584712,gi|24584698
Myosin heavy chain CG17927-PA, isoform A [Drosophila melanogaster]	gi|24584704,gi|28574239	224597	1	128	186	2330	0.0109	0.549	TRUE	A12.2367.2367.2.dta	ELSFQSEEDR	K	K	0.95	34.7	36.3	0	2		620.658	1239.3	1239.55	2	0.7593	612.2	1848	1857	TRUE	gi|24584700,gi|24584706,gi|24584710,gi|24584702,gi|24584712,gi|24584698
Myosin heavy chain CG17927-PA, isoform A [Drosophila melanogaster]	gi|24584704,gi|28574239	224597	1	128	186	2330	0.0109	0.549	TRUE	S_F1.5008.5008.2.dta	GDIVSVGLQGGETR	K	D	0.95	34.7	36.9	0	2		694.336	1386.66	1387.72	2	-0.05391	-38.85	57	70	TRUE	gi|24584700,gi|24584706,gi|24584710,gi|24584702,gi|24584712
bent CG32019-PA, isoform A [Drosophila melanogaster]	gi|28558739,gi|45552153	1.00129e+06	1	118	128	787	0.00368	0.191	TRUE	S_E910.3524.3524.2.dta	YTVTAANEFGK	K	D	0.95	34.7	36.8	0	2		600.821	1199.63	1200.59	2	0.04458	37.13	6246	6256	TRUE
sallimus CG1915-PC, isoform C [Drosophila melanogaster]	gi|161080703	2.06604e+06	1	83	86	363	0.0017	0.0614	TRUE	S_F1.4146.4146.2.dta	EQVVAPQFVQR	K	F	0.95	34.7	36.9	0	2		651.366	1300.72	1300.7	2	1.023	786.1	466	476	TRUE
sallimus CG1915-PC, isoform C [Drosophila melanogaster]	gi|161080703	2.06604e+06	1	83	86	363	0.0017	0.0614	TRUE	A8.2951.2951.2.dta	NSVGESIATTELK	R	V	0.95	34.7	36.7	0	2		675.264	1348.51	1348.7	2	0.8236	610.3	4167	4179	TRUE
CG32702 CG32702-PA [Drosophila melanogaster]	gi|24640838	411066	1	55	57	276	0.00129	0.175	TRUE	S_A12Dros.1411.1411.2.dta	DALTVSNHK	K	N	0.95	34.7	36.1	0	2		492.778	983.54	984.511	2	0.03598	36.55	1448	1456	TRUE
CG32702 CG32702-PA [Drosophila melanogaster]	gi|24640838	411066	1	55	57	276	0.00129	0.175	TRUE	S_F911.5969.5969.2.dta	LNPPTFTSEFNR	R	L	0.95	34.7	36.4	0	2		712.257	1422.5	1422.7	2	0.8039	564.7	752	763	TRUE
Muscle-specific protein 300 CG33715-PD, isoform D [Drosophila melanogaster]	gi|161076705	1.40526e+06	1	45	45	109	0.00051	0.0478	TRUE	S_E911.5480.5480.2.dta	VPTTDELYPTLATK	K	K	0.95	34.7	36.7	0	2		774.853	1547.69	1548.82	2	-0.1177	-76.01	3349	3362	TRUE
Laminin A CG10236-PA [Drosophila melanogaster]	gi|17136292	411103	1	44	48	274	0.00128	0.16	TRUE	S_F912.3465.3465.2.dta	IATNKPPYASLDER	R	V	0.95	34.7	36.5	0	2		788.379	1574.74	1574.82	2	0.9327	591.9	1196	1209	TRUE
Laminin A CG10236-PA [Drosophila melanogaster]	gi|17136292	411103	1	44	48	274	0.00128	0.16	TRUE	S_E9.5986.5986.2.dta	AQDLAAQYTDMTASAEPAIK	K	A	0.95	34.7	36.3	0	2		1048.35	2094.68	2095	2	0.6873	328	2435	2454	TRUE
CG1516 CG1516-PE, isoform E [Drosophila melanogaster]	gi|19921944,gi|24652210,gi|24652212,gi|24652214,gi|24652216,gi|24652218,gi|24652220,gi|24652222,gi|24652224	130848	1	36	39	469	0.00219	0.346	TRUE	S_F2.4055.4055.2.dta	FIGPSPEVVQK	R	M	0.95	34.7	36.8	0	2		600.677	1199.34	1200.66	2	-0.3165	-263.7	140	150	TRUE
Laminin B2 CG3322-PA [Drosophila melanogaster]	gi|17737557	182321	1	30	31	130	0.000608	0.241	TRUE	S_E912.3424.3424.2.dta	ALQTVPNIEK	K	E	0.95	34.7	36.4	0	2		556.758	1111.5	1112.63	2	-0.1242	-111.7	1417	1426	TRUE
Laminin B2 CG3322-PA [Drosophila melanogaster]	gi|17737557	182321	1	30	31	130	0.000608	0.241	TRUE	S_G1.5090.5090.2.dta	DcGEcQPGYFNIR	R	S	0.95	34.7	36.8	0	2	c2: Carbamidomethyl (+57.02), c5: Carbamidomethyl (+57.02)	808.213	1614.41	1615.66	2	-0.2451	-151.7	936	948	TRUE
Laminin B2 CG3322-PA [Drosophila melanogaster]	gi|17737557	182321	1	30	31	130	0.000608	0.241	TRUE	S_G2.7549.7549.2.dta	LNTFGDELFGDSQVLK	R	S	0.95	34.7	36.4	0	2		892.045	1782.07	1782.89	2	0.191	107.1	269	284	TRUE
rhea CG6831-PA [Drosophila melanogaster]	gi|21355751	306972	1	28	28	106	0.000496	0.146	TRUE	S_F2.5498.5498.2.dta	QVAASTAQLLIAcK	K	V	0.95	34.7	36.6	0	2	c13: Carbamidomethyl (+57.02)	737.284	1472.55	1473.81	2	-0.2506	-170	2437	2450	TRUE
Aconitase CG9244-PB, isoform B [Drosophila melanogaster]	gi|17864292	85383.5	1	27	37	473	0.00221	0.417	TRUE	S_F2.4729.4729.2.dta	LKAPFGDELPAK	K	G	0.95	34.7	36.8	0	2		643.821	1285.63	1285.72	2	0.9178	713.3	532	543	TRUE
bellwether CG3612-PA [Drosophila melanogaster]	gi|24658560	59405.3	1	27	35	476	0.00223	0.411	TRUE	S_A8Dros.2531.2531.2.dta	LELAQYR	K	E	0.95	34.7	36.5	0	2		447.196	892.377	892.489	2	0.8952	1002	434	440	TRUE
Cytochrome P450-4g1 CG3972-PA [Drosophila melanogaster]	gi|17933498	62954.7	1	24	31	601	0.00281	0.39	TRUE	S_E6.3613.3613.3.dta	NYIVHSTDTEADFK	R	L	0.95	34.7	36.5	1.57	2		547.212	1638.61	1639.76	3	-0.1409	-85.93	517	530	TRUE
Cytochrome P450-4g1 CG3972-PA [Drosophila melanogaster]	gi|17933498	62954.7	1	24	31	601	0.00281	0.39	TRUE	S_F5.4415.4415.2.dta	mMNIILGmTSK	R	V	0.95	34.7	36.8	0	2	m1: Oxidation (+15.99), m8: Oxidation (+15.99)	636.203	1270.39	1270.62	2	0.7764	610.6	261	271	TRUE
CG32092 CG32092-PB [Drosophila melanogaster]	gi|24662922	283041	1	18	19	88	0.000412	0.0809	TRUE	S_G1.3361.3361.2.dta	ISVPAGGSLR	K	F	0.95	34.7	36.9	0	2		479.233	956.451	956.553	2	0.9055	945.7	2440	2449	TRUE
CG4169 CG4169-PA [Drosophila melanogaster]	gi|24665395	45397.7	1	18	22	151	0.000706	0.577	TRUE	S_F6.5137.5137.2.dta	LVVATADATLPVSR	K	V	0.95	34.7	36.7	0	2		707.233	1412.45	1412.81	2	0.6473	457.9	41	54	TRUE
Lamin C CG10119-PA [Drosophila melanogaster]	gi|24653664	69843.7	1	17	18	59	0.000276	0.33	TRUE	S_F1.4387.4387.2.dta	IAGDEELAFK	R	F	0.95	34.7	36.2	0	2		547.211	1092.41	1092.56	2	0.8566	783.4	512	521	TRUE
upheld CG7107-PF, isoform F [Drosophila melanogaster]	gi|62473664	47113.5	1	17	23	236	0.0011	0.405	TRUE	A9.4101.4101.2.dta	IKPLAIEGFGEAK	R	L	0.95	34.7	36.9	0	2		686.882	1371.75	1372.78	2	-0.02764	-20.13	180	192	TRUE	gi|62473654,gi|24641813
Heat shock protein cognate 3 CG4147-PA, isoform A [Drosophila melanogaster]	gi|24641402,gi|24641404,gi|24641406,gi|24641408	72244.5	1	17	21	185	0.000866	0.314	TRUE	S_F4.5515.5515.2.dta	ITPSYVAFTADGER	R	L	0.95	34.7	36.4	0	2		764.092	1526.17	1526.75	2	0.4265	279.3	62	75	TRUE
Protein disulfide isomerase CG6988-PA, isoform A [Drosophila melanogaster]	gi|17647799	55764.9	1	15	16	73	0.000342	0.341	TRUE	A9.6144.6144.2.dta	QAADIIAWVTK	R	K	0.95	34.7	37	0	2		608.275	1214.53	1215.67	2	-0.1322	-108.8	121	131	TRUE
NADH:ubiquinone reductase 75kD subunit precursor CG2286-PA, isoform A [Drosophila melanogaster]	gi|24640557,gi|24640559	78613	1	14	17	68	0.000318	0.274	TRUE	A10.1965.1965.3.dta	LEDVAPHLTR	R	L	0.95	34.7	36.4	0	2		384.214	1149.62	1150.62	3	0.004296	3.734	652	661	TRUE
CG9090 CG9090-PA [Drosophila melanogaster]	gi|24656137	40535.9	1	13	16	119	0.000557	0.299	TRUE	S_E7.1509.1509.2.dta	LQVDPAK	R	Y	0.95	34.7	35.8	0	2		385.598	769.18	770.441	2	-0.2539	-329.7	103	109	TRUE
CG12262 CG12262-PA [Drosophila melanogaster]	gi|24660351	45854.8	1	12	13	112	0.000524	0.363	TRUE	S_F912.5189.5189.2.dta	EEIIPVAAQYDK	R	S	0.95	34.7	36.6	0	2		688.799	1375.58	1375.71	2	0.8794	638.8	54	65	TRUE
lethal (2) 44DEa CG8732-PD, isoform D [Drosophila melanogaster]	gi|22026970,gi|24586634,gi|24586636,gi|62471679,gi|62471681,gi|62471683,gi|62471685,gi|62471687,gi|62471689	80601.5	1	12	12	107	0.000501	0.24	TRUE	S_F912.4642.4643.2.dta	LVNWEEGNYR	R	V	0.95	34.7	36.4	0	2		641.046	1280.08	1279.61	2	1.478	1153	506	515	TRUE
CG6782 CG6782-PE, isoform E [Drosophila melanogaster]	gi|78706744,gi|78706746,gi|78706748,gi|78706750	34076.3	1	10	10	28	0.000131	0.259	TRUE	S_A6Dros.2362.2362.2.dta	SEGISGIYK	K	G	0.95	34.7	35.7	0	2		477.642	953.268	953.495	2	0.781	818.4	182	190	TRUE
Oligomycin sensitivity-conferring protein CG4307-PA, isoform A [Drosophila melanogaster]	gi|24647054	22405.2	1	10	13	64	0.000299	0.455	TRUE	S_E7.3750.3750.2.dta	EYVTSPIINK	R	K	0.95	34.7	36.8	0	2		582.918	1163.82	1163.63	2	1.197	1028	72	81	TRUE
CG11876 CG11876-PD, isoform D [Drosophila melanogaster]	gi|21358145,gi|24650940	39333.6	1	9	12	71	0.000332	0.227	TRUE	S_E7.3252.3252.2.dta	VLSPYDAEDAR	K	G	0.95	34.7	36.6	0	2		618.124	1234.23	1235.59	2	-0.3512	-284.3	170	180	TRUE
fau CG6544-PA, isoform A [Drosophila melanogaster]	gi|45550732	68623.5	1	9	11	44	0.000206	0.197	TRUE	S_E9.6329.6329.2.dta	IAAEEALLAEAAAQK	K	A	0.95	34.7	36.4	0	2		749.876	1497.74	1498.81	2	-0.06713	-44.79	378	392	TRUE
Ribosomal protein S16 CG4046-PA [Drosophila melanogaster]	gi|19922746	16756.9	1	8	8	48	0.000225	0.439	TRUE	S_F6.4768.4768.2.dta	ALVAFYQK	K	Y	0.95	34.7	35.7	0	2		470.767	939.519	939.53	2	0.9961	1059	93	100	TRUE
Chorion protein 36 CG1478-PA [Drosophila melanogaster]	gi|17530857	29897.1	1	7	8	33	0.000154	0.327	TRUE	S_E7.6648.6648.2.dta	IEAPLAPVVAPVYSQPR	K	E	0.95	34.7	36.5	0	2		904.524	1807.03	1807.01	2	1.028	568.3	221	237	TRUE
CG2165 CG2165-PE, isoform E [Drosophila melanogaster]	gi|62473099,gi|62473111,gi|62473120,gi|62484399,gi|62484401	116171	1	7	7	35	0.000164	0.0919	TRUE	S_A4Dros.3125.3125.2.dta	KPYGRTKPLISR	R	T	0.95	34.7	36.7	0	2		708.559	1415.1	1415.85	2	0.2618	184.9	865	876	TRUE
Sc2 CG10849-PA [Drosophila melanogaster]	gi|24657023	34168.4	1	7	8	63	0.000295	0.162	TRUE	S_E8.5651.5651.2.dta	DTDTLESLSLR	K	S	0.95	34.7	36.4	0	2		625.66	1249.3	1249.63	2	0.6849	547.8	59	69	TRUE
CG5214 CG5214-PA [Drosophila melanogaster]	gi|24645909	49907.2	1	7	8	48	0.000225	0.182	TRUE	S_A6Dros.2315.2315.2.dta	QNLDAFTK	K	K	0.95	34.7	35.9	0	2		469.208	936.401	936.479	2	0.9293	991.3	282	289	TRUE
ade5 CG3989-PA [Drosophila melanogaster]	gi|18860083	47264.2	1	7	7	29	0.000136	0.184	TRUE	A8.2229.2229.2.dta	AEISNTTNGQVFR	K	L	0.95	34.7	36.2	0	2		719.167	1436.32	1436.71	2	0.6133	426.7	59	71	TRUE
Beta Adaptin CG12532-PA [Drosophila melanogaster]	gi|17647183	101165	1	6	6	19	8.89e-05	0.0814	TRUE	S_F7.4755.4755.2.dta	LQPGNPEATLSLK	K	S	0.95	34.7	36.3	0	2		684.803	1367.59	1367.75	2	0.845	617.4	888	900	TRUE
CG3560 CG3560-PA [Drosophila melanogaster]	gi|24642430	13550.9	1	6	7	35	0.000164	0.369	TRUE	S_A3Dros.1375.1375.2.dta	YEEDVK	K	Y	0.95	34.7	35.1	0	2		391.714	781.413	782.357	2	0.06318	80.75	83	88	TRUE
CG2233 CG2233-PA [Drosophila melanogaster]	gi|18921139	46492.2	1	6	8	24	0.000112	0.14	TRUE	S_E9.5244.5244.2.dta	NLFETISK	K	S	0.95	34.7	36.3	0	2		476.225	950.435	951.515	2	-0.07273	-76.44	199	206	TRUE
Rab-protein 1 CG3320-PA, isoform A [Drosophila melanogaster]	gi|24648682	22745.2	1	6	7	16	7.49e-05	0.346	TRUE	S_F7.5649.5649.2.dta	LLLIGDSGVGK	K	S	0.95	34.7	36.9	0	2		536.17	1070.32	1071.64	2	-0.31	-289.4	14	24	TRUE	gi|17737369
innexin 2 CG4590-PA, isoform A [Drosophila melanogaster]	gi|18858897,gi|24640280	42471.4	1	5	6	10	4.68e-05	0.174	TRUE	S_E8.4341.4341.2.dta	LAESEEVELVANK	R	C	0.95	34.7	36.7	0	2		716.257	1430.5	1430.74	2	0.7688	537	309	321	TRUE
CG5903 CG5903-PA [Drosophila melanogaster]	gi|21357927	24463.3	1	5	5	16	7.49e-05	0.217	TRUE	S_A5Dros.1398.1398.2.dta	EEVQSGYK	R	A	0.95	34.7	35.6	0	2		470.233	938.451	939.442	2	0.01609	17.13	77	84	TRUE
Ribosomal protein S6 CG10944-PB, isoform B [Drosophila melanogaster]	gi|17737290	28390.4	1	4	5	25	0.000117	0.169	TRUE	A6.4435.4435.2.dta	DIPGLTDTTIPR	K	R	0.95	34.7	36.4	0	2		650.093	1298.17	1298.7	2	0.4827	371.5	120	131	TRUE
ATP citrate lyase CG8322-PA, isoform A [Drosophila melanogaster]	gi|24653988,gi|24653990	118576	1	4	4	8	3.74e-05	0.0543	TRUE	S_G1.5567.5567.2.dta	ATDGVIEGIAIGGDR	K	Y	0.95	34.7	36.8	0	2		722.811	1443.61	1443.74	2	0.87	602.2	663	677	TRUE
CG9172 CG9172-PA, isoform A [Drosophila melanogaster]	gi|18859983,gi|24642371	24576.2	1	3	3	10	4.68e-05	0.154	TRUE	S_A4Dros.3073.3073.2.dta	QSSVAEWSLAR	K	L	0.95	34.7	36.9	0	2		617.07	1232.12	1233.62	2	-0.4902	-397.5	64	74	TRUE
CG3153 CG3153-PB, isoform B [Drosophila melanogaster]	gi|21358295,gi|24646746	17266.9	1	3	3	5	2.34e-05	0.22	TRUE	S_E4.3443.3443.3.dta	HGDAAcFQIPAK	K	I	0.95	34.7	36.9	0	2	c6: Carbamidomethyl (+57.02)	438.806	1313.39	1314.63	3	-0.2251	-171.2	145	156	TRUE
TpnC25D CG6514-PA [Drosophila melanogaster]	gi|24581885	16778.8	1	3	4	16	7.49e-05	0.195	TRUE	A3.3884.3884.2.dta	TGFIETLR	K	L	0.95	34.7	36.5	0	2		468.744	935.472	936.516	2	-0.03613	-38.58	22	29	TRUE
CG5377 CG5377-PA [Drosophila melanogaster]	gi|24649021	31686.5	1	3	3	6	2.81e-05	0.112	TRUE	S_F4.6557.6557.2.dta	mREPmEK	R	V	0.95	34.7	36.3	0	2	m1: Oxidation (+15.99), m5: Oxidation (+15.99)	476.242	950.468	952.423	2	-0.9479	-996.2	173	179	TRUE
CG12455 CG12455-PA, isoform A [Drosophila melanogaster]	gi|24584558	249743	0.999	2	2	2	9.36e-06	0.0114	TRUE	S_E912.6488.6488.2.dta	LLGVAGTDVPVEDIDK	R	L	0.95	34.7	36.6	0	2		820.943	1639.87	1640.88	2	0.002381	1.451	497	512	TRUE
Myosin heavy chain CG17927-PF, isoform F [Drosophila melanogaster]	gi|24584700	224516	0.998	2	2	20	9.36e-05	0.548	FALSE	A10.3521.3521.3.dta	NLEHDLDNLR	R	E	0.95	34.7	36.1	0	2		413.532	1237.57	1238.61	3	-0.0314	-25.35	1334	1343	FALSE	gi|24584704,gi|28574239,gi|24584706,gi|24584710,gi|24584702,gi|24584712,gi|24584698
Myosin heavy chain CG17927-PF, isoform F [Drosophila melanogaster]	gi|24584700	224516	0.998	2	2	20	9.36e-05	0.548	FALSE	S_A11Dros.1856.1856.2.dta	MQDLVDK	R	L	0.95	34.7	37	0	2		425.225	848.434	848.419	2	1.022	1204	1863	1869	FALSE	gi|24584704,gi|28574239,gi|24584706,gi|24584710,gi|24584702,gi|24584712,gi|24584698
Myosin heavy chain CG17927-PF, isoform F [Drosophila melanogaster]	gi|24584700	224516	0.998	2	2	20	9.36e-05	0.548	FALSE	S_A8Dros.3757.3757.2.dta	FDLAPENEF	R	-	0.95	34.7	35.9	0	2		541.638	1081.26	1081.48	2	0.7842	724.6	1954	1962	FALSE	gi|24584704,gi|28574239,gi|24584706,gi|24584710,gi|24584702,gi|24584698
Myosin heavy chain CG17927-PF, isoform F [Drosophila melanogaster]	gi|24584700	224516	0.998	2	2	20	9.36e-05	0.548	FALSE	S_E911.7067.7067.2.dta	FDLAPENEF	R	-	0.95	34.7	35.9	0	2		541.666	1081.32	1081.48	2	0.8394	775.5	1954	1962	FALSE	gi|24584704,gi|28574239,gi|24584706,gi|24584710,gi|24584702,gi|24584698
Myosin heavy chain CG17927-PF, isoform F [Drosophila melanogaster]	gi|24584700	224516	0.998	2	2	20	9.36e-05	0.548	FALSE	S_A10Dros.4048.4048.2.dta	DLLDQIGEGGR	K	N	0.95	34.7	37	0	2		586.743	1171.47	1172.59	2	-0.1128	-96.22	1510	1520	FALSE	gi|24584704,gi|28574239,gi|24584706,gi|24584710,gi|24584702,gi|24584712,gi|24584698
Myosin heavy chain CG17927-PF, isoform F [Drosophila melanogaster]	gi|24584700	224516	0.998	2	2	20	9.36e-05	0.548	FALSE	A12.2367.2367.2.dta	ELSFQSEEDR	K	K	0.95	34.7	36.3	0	2		620.658	1239.3	1239.55	2	0.7593	612.2	1848	1857	FALSE	gi|24584704,gi|28574239,gi|24584706,gi|24584710,gi|24584702,gi|24584712,gi|24584698
Myosin heavy chain CG17927-PF, isoform F [Drosophila melanogaster]	gi|24584700	224516	0.998	2	2	20	9.36e-05	0.548	FALSE	S_F1.5008.5008.2.dta	GDIVSVGLQGGETR	K	D	0.95	34.7	36.9	0	2		694.336	1386.66	1387.72	2	-0.05391	-38.85	57	70	FALSE	gi|24584704,gi|28574239,gi|24584706,gi|24584710,gi|24584702,gi|24584712
CG6084 CG6084-PA, isoform A [Drosophila melanogaster]	gi|24662781,gi|24662785	35905	1	2	2	3	1.4e-05	0.0759	TRUE	S_E8.7423.7423.2.dta	TLYSPVDYVDTWK	K	A	0.95	34.7	36.6	0	2		793.82	1585.62	1586.77	2	-0.1419	-89.44	132	144	TRUE
lark CG8597-PA, isoform A [Drosophila melanogaster]	gi|17647581,gi|24659966,gi|24659971,gi|24659976,gi|24659981	39894.7	0.998	2	2	2	9.36e-06	0.0568	TRUE	S_F7.3630.3630.2.dta	YGTVVEcDVVK	K	N	0.95	34.7	36.6	0	2	c7: Carbamidomethyl (+57.02)	635.304	1268.59	1268.62	2	0.9799	771.8	30	40	TRUE
Myosin heavy chain CG17927-PB, isoform B [Drosophila melanogaster]	gi|24584710	224397	0.998	2	2	9	4.21e-05	0.534	FALSE	A10.3521.3521.3.dta	NLEHDLDNLR	R	E	0.95	34.7	36.1	0	2		413.532	1237.57	1238.61	3	-0.0314	-25.35	1334	1343	FALSE	gi|24584704,gi|24584700,gi|28574239,gi|24584706,gi|24584702,gi|24584712,gi|24584698
Myosin heavy chain CG17927-PB, isoform B [Drosophila melanogaster]	gi|24584710	224397	0.998	2	2	9	4.21e-05	0.534	FALSE	S_A11Dros.1856.1856.2.dta	MQDLVDK	R	L	0.95	34.7	37	0	2		425.225	848.434	848.419	2	1.022	1204	1863	1869	FALSE	gi|24584704,gi|24584700,gi|28574239,gi|24584706,gi|24584702,gi|24584712,gi|24584698
Myosin heavy chain CG17927-PB, isoform B [Drosophila melanogaster]	gi|24584710	224397	0.998	2	2	9	4.21e-05	0.534	FALSE	S_A8Dros.3757.3757.2.dta	FDLAPENEF	R	-	0.95	34.7	35.9	0	2		541.638	1081.26	1081.48	2	0.7842	724.6	1954	1962	FALSE	gi|24584704,gi|24584700,gi|28574239,gi|24584706,gi|24584702,gi|24584698
Myosin heavy chain CG17927-PB, isoform B [Drosophila melanogaster]	gi|24584710	224397	0.998	2	2	9	4.21e-05	0.534	FALSE	S_E911.7067.7067.2.dta	FDLAPENEF	R	-	0.95	34.7	35.9	0	2		541.666	1081.32	1081.48	2	0.8394	775.5	1954	1962	FALSE	gi|24584704,gi|24584700,gi|28574239,gi|24584706,gi|24584702,gi|24584698
Myosin heavy chain CG17927-PB, isoform B [Drosophila melanogaster]	gi|24584710	224397	0.998	2	2	9	4.21e-05	0.534	FALSE	S_A10Dros.4048.4048.2.dta	DLLDQIGEGGR	K	N	0.95	34.7	37	0	2		586.743	1171.47	1172.59	2	-0.1128	-96.22	1510	1520	FALSE	gi|24584704,gi|24584700,gi|28574239,gi|24584706,gi|24584702,gi|24584712,gi|24584698
Myosin heavy chain CG17927-PB, isoform B [Drosophila melanogaster]	gi|24584710	224397	0.998	2	2	9	4.21e-05	0.534	FALSE	A12.2367.2367.2.dta	ELSFQSEEDR	K	K	0.95	34.7	36.3	0	2		620.658	1239.3	1239.55	2	0.7593	612.2	1848	1857	FALSE	gi|24584704,gi|24584700,gi|28574239,gi|24584706,gi|24584702,gi|24584712,gi|24584698
Myosin heavy chain CG17927-PB, isoform B [Drosophila melanogaster]	gi|24584710	224397	0.998	2	2	9	4.21e-05	0.534	FALSE	S_F1.5008.5008.2.dta	GDIVSVGLQGGETR	K	D	0.95	34.7	36.9	0	2		694.336	1386.66	1387.72	2	-0.05391	-38.85	57	70	FALSE	gi|24584704,gi|24584700,gi|28574239,gi|24584706,gi|24584702,gi|24584712
CG12703 CG12703-PA [Drosophila melanogaster]	gi|24643394	75286.4	0.998	2	2	9	4.21e-05	0.0466	TRUE	S_E911.5900.5900.2.dta	IANADQLLTTDIDK	R	F	0.95	34.7	36.8	0	2		766.153	1530.29	1530.8	2	0.4966	324.3	186	199	TRUE
upheld CG7107-PA, isoform A [Drosophila melanogaster]	gi|24641813	47430.7	0.998	2	2	17	7.95e-05	0.408	FALSE	A9.4101.4101.2.dta	IKPLAIEGFGEAK	R	L	0.95	34.7	36.9	0	2		686.882	1371.75	1372.78	2	-0.02764	-20.13	184	196	FALSE	gi|62473654,gi|62473664
CG7997 CG7997-PA, isoform A [Drosophila melanogaster]	gi|19922382,gi|24654142	47387.2	0.999	2	2	8	3.74e-05	0.0552	TRUE	S_A8Dros.1302.1302.2.dta	RDDGAPYR	R	I	0.95	34.7	36.7	0	2		475.215	948.414	949.449	2	-0.02783	-29.31	356	363	TRUE
Myosin heavy chain CG17927-PJ, isoform J [Drosophila melanogaster]	gi|24584698	224394	0.998	2	2	3	1.4e-05	0.541	FALSE	A10.3521.3521.3.dta	NLEHDLDNLR	R	E	0.95	34.7	36.1	0	2		413.532	1237.57	1238.61	3	-0.0314	-25.35	1332	1341	FALSE	gi|24584704,gi|24584700,gi|28574239,gi|24584706,gi|24584710,gi|24584702,gi|24584712
Myosin heavy chain CG17927-PJ, isoform J [Drosophila melanogaster]	gi|24584698	224394	0.998	2	2	3	1.4e-05	0.541	FALSE	S_A11Dros.1856.1856.2.dta	MQDLVDK	R	L	0.95	34.7	37	0	2		425.225	848.434	848.419	2	1.022	1204	1861	1867	FALSE	gi|24584704,gi|24584700,gi|28574239,gi|24584706,gi|24584710,gi|24584702,gi|24584712
Myosin heavy chain CG17927-PJ, isoform J [Drosophila melanogaster]	gi|24584698	224394	0.998	2	2	3	1.4e-05	0.541	FALSE	S_A8Dros.3757.3757.2.dta	FDLAPENEF	R	-	0.95	34.7	35.9	0	2		541.638	1081.26	1081.48	2	0.7842	724.6	1952	1960	FALSE	gi|24584704,gi|24584700,gi|28574239,gi|24584706,gi|24584710,gi|24584702
Myosin heavy chain CG17927-PJ, isoform J [Drosophila melanogaster]	gi|24584698	224394	0.998	2	2	3	1.4e-05	0.541	FALSE	S_E911.7067.7067.2.dta	FDLAPENEF	R	-	0.95	34.7	35.9	0	2		541.666	1081.32	1081.48	2	0.8394	775.5	1952	1960	FALSE	gi|24584704,gi|24584700,gi|28574239,gi|24584706,gi|24584710,gi|24584702
Myosin heavy chain CG17927-PJ, isoform J [Drosophila melanogaster]	gi|24584698	224394	0.998	2	2	3	1.4e-05	0.541	FALSE	S_A10Dros.4048.4048.2.dta	DLLDQIGEGGR	K	N	0.95	34.7	37	0	2		586.743	1171.47	1172.59	2	-0.1128	-96.22	1508	1518	FALSE	gi|24584704,gi|24584700,gi|28574239,gi|24584706,gi|24584710,gi|24584702,gi|24584712
Myosin heavy chain CG17927-PJ, isoform J [Drosophila melanogaster]	gi|24584698	224394	0.998	2	2	3	1.4e-05	0.541	FALSE	A12.2367.2367.2.dta	ELSFQSEEDR	K	K	0.95	34.7	36.3	0	2		620.658	1239.3	1239.55	2	0.7593	612.2	1846	1855	FALSE	gi|24584704,gi|24584700,gi|28574239,gi|24584706,gi|24584710,gi|24584702,gi|24584712
upheld CG7107-PG, isoform G [Drosophila melanogaster]	gi|62473654	47331.6	0.986	1	1	1	4.68e-06	0.407	FALSE	A9.4101.4101.2.dta	IKPLAIEGFGEAK	R	L	0.95	34.7	36.9	0	2		686.882	1371.75	1372.78	2	-0.02764	-20.13	183	195	FALSE	gi|24641813,gi|62473664
Myosin heavy chain CG17927-PK, isoform K [Drosophila melanogaster]	gi|24584712	221394	0.993	1	1	1	4.68e-06	0.52	FALSE	A10.3521.3521.3.dta	NLEHDLDNLR	R	E	0.95	34.7	36.1	0	2		413.532	1237.57	1238.61	3	-0.0314	-25.35	1334	1343	FALSE	gi|24584704,gi|24584700,gi|28574239,gi|24584706,gi|24584710,gi|24584702,gi|24584698
Myosin heavy chain CG17927-PK, isoform K [Drosophila melanogaster]	gi|24584712	221394	0.993	1	1	1	4.68e-06	0.52	FALSE	S_A11Dros.1856.1856.2.dta	MQDLVDK	R	L	0.95	34.7	37	0	2		425.225	848.434	848.419	2	1.022	1204	1863	1869	FALSE	gi|24584704,gi|24584700,gi|28574239,gi|24584706,gi|24584710,gi|24584702,gi|24584698
Myosin heavy chain CG17927-PK, isoform K [Drosophila melanogaster]	gi|24584712	221394	0.993	1	1	1	4.68e-06	0.52	FALSE	S_A10Dros.4048.4048.2.dta	DLLDQIGEGGR	K	N	0.95	34.7	37	0	2		586.743	1171.47	1172.59	2	-0.1128	-96.22	1510	1520	FALSE	gi|24584704,gi|24584700,gi|28574239,gi|24584706,gi|24584710,gi|24584702,gi|24584698
Myosin heavy chain CG17927-PK, isoform K [Drosophila melanogaster]	gi|24584712	221394	0.993	1	1	1	4.68e-06	0.52	FALSE	A12.2367.2367.2.dta	ELSFQSEEDR	K	K	0.95	34.7	36.3	0	2		620.658	1239.3	1239.55	2	0.7593	612.2	1848	1857	FALSE	gi|24584704,gi|24584700,gi|28574239,gi|24584706,gi|24584710,gi|24584702,gi|24584698
Myosin heavy chain CG17927-PK, isoform K [Drosophila melanogaster]	gi|24584712	221394	0.993	1	1	1	4.68e-06	0.52	FALSE	S_F1.5008.5008.2.dta	GDIVSVGLQGGETR	K	D	0.95	34.7	36.9	0	2		694.336	1386.66	1387.72	2	-0.05391	-38.85	57	70	FALSE	gi|24584704,gi|24584700,gi|28574239,gi|24584706,gi|24584710,gi|24584702
CG9034 CG9034-PA [Drosophila melanogaster]	gi|21358417	8382.8	0.5	1	1	3	1.4e-05	0.0909	TRUE	S_F4.4009.4009.2.dta	LGYVVYR	K	H	0.95	34.7	35.6	0	2		435.155	868.294	869.489	2	-0.187	-215.1	56	62	TRUE
CG14613 CG14613-PA [Drosophila melanogaster]	gi|19920420	26564.7	0.5	1	2	9	4.21e-05	0.0871	TRUE	S_F6.2695.2695.3.dta	SANPAAAAPAPAINNSSAGGK	K	D	0.95	34.7	36.5	1.27	2		613.22	1836.64	1836.92	3	0.7241	394	65	85	TRUE
Rab-protein 10 CG17060-PA [Drosophila melanogaster]	gi|17737369	23319	0.5	1	1	2	9.36e-06	0.167	FALSE	S_F7.5649.5649.2.dta	LLLIGDSGVGK	K	T	0.95	34.7	36.9	0	2		536.17	1070.32	1071.64	2	-0.31	-289.4	12	22	FALSE	gi|24648682
Myosin heavy chain CG17927-PD, isoform D [Drosophila melanogaster]	gi|24584702,gi|24584706	224480	0.994	1	1	38	0.000178	0.544	FALSE	A10.3521.3521.3.dta	NLEHDLDNLR	R	E	0.95	34.7	36.1	0	2		413.532	1237.57	1238.61	3	-0.0314	-25.35	1334	1343	FALSE	gi|24584704,gi|24584700,gi|28574239,gi|24584710,gi|24584712,gi|24584698
Myosin heavy chain CG17927-PD, isoform D [Drosophila melanogaster]	gi|24584702,gi|24584706	224480	0.994	1	1	38	0.000178	0.544	FALSE	S_A11Dros.1856.1856.2.dta	MQDLVDK	R	L	0.95	34.7	37	0	2		425.225	848.434	848.419	2	1.022	1204	1863	1869	FALSE	gi|24584704,gi|24584700,gi|28574239,gi|24584710,gi|24584712,gi|24584698
Myosin heavy chain CG17927-PD, isoform D [Drosophila melanogaster]	gi|24584702,gi|24584706	224480	0.994	1	1	38	0.000178	0.544	FALSE	S_A8Dros.3757.3757.2.dta	FDLAPENEF	R	-	0.95	34.7	35.9	0	2		541.638	1081.26	1081.48	2	0.7842	724.6	1954	1962	FALSE	gi|24584704,gi|24584700,gi|28574239,gi|24584710,gi|24584698
Myosin heavy chain CG17927-PD, isoform D [Drosophila melanogaster]	gi|24584702,gi|24584706	224480	0.994	1	1	38	0.000178	0.544	FALSE	S_E911.7067.7067.2.dta	FDLAPENEF	R	-	0.95	34.7	35.9	0	2		541.666	1081.32	1081.48	2	0.8394	775.5	1954	1962	FALSE	gi|24584704,gi|24584700,gi|28574239,gi|24584710,gi|24584698
Myosin heavy chain CG17927-PD, isoform D [Drosophila melanogaster]	gi|24584702,gi|24584706	224480	0.994	1	1	38	0.000178	0.544	FALSE	S_A10Dros.4048.4048.2.dta	DLLDQIGEGGR	K	N	0.95	34.7	37	0	2		586.743	1171.47	1172.59	2	-0.1128	-96.22	1510	1520	FALSE	gi|24584704,gi|24584700,gi|28574239,gi|24584710,gi|24584712,gi|24584698
Myosin heavy chain CG17927-PD, isoform D [Drosophila melanogaster]	gi|24584702,gi|24584706	224480	0.994	1	1	38	0.000178	0.544	FALSE	A12.2367.2367.2.dta	ELSFQSEEDR	K	K	0.95	34.7	36.3	0	2		620.658	1239.3	1239.55	2	0.7593	612.2	1848	1857	FALSE	gi|24584704,gi|24584700,gi|28574239,gi|24584710,gi|24584712,gi|24584698
Myosin heavy chain CG17927-PD, isoform D [Drosophila melanogaster]	gi|24584702,gi|24584706	224480	0.994	1	1	38	0.000178	0.544	FALSE	S_F1.5008.5008.2.dta	GDIVSVGLQGGETR	K	D	0.95	34.7	36.9	0	2		694.336	1386.66	1387.72	2	-0.05391	-38.85	57	70	FALSE	gi|24584704,gi|24584700,gi|28574239,gi|24584710,gi|24584712
Myosin heavy chain CG17927-PA, isoform A [Drosophila melanogaster]	gi|24584704,gi|28574239	224597	1	128	186	2330	0.0109	0.549	TRUE	S_A7Dros.1366.1366.3.dta	SEELEEAKR	R	K	0.95	34.8	37.2	0	2		364.137	1089.39	1090.54	3	-0.1435	-131.6	1382	1390	TRUE	gi|24584700,gi|24584706,gi|24584710,gi|24584702,gi|24584712,gi|24584698
Myosin heavy chain CG17927-PA, isoform A [Drosophila melanogaster]	gi|24584704,gi|28574239	224597	1	128	186	2330	0.0109	0.549	TRUE	S_G3.4236.4237.3.dta	ISLTTQLEDTKR	K	L	0.95	34.8	36.8	0	2		469.081	1404.22	1404.77	3	0.4574	325.5	1305	1316	TRUE	gi|24584700,gi|24584706,gi|24584710,gi|24584702,gi|24584712,gi|24584698
Myosin heavy chain CG17927-PA, isoform A [Drosophila melanogaster]	gi|24584704,gi|28574239	224597	1	128	186	2330	0.0109	0.549	TRUE	S_F2.3127.3127.3.dta	VRELENELDGEQR	R	R	0.95	34.8	36.6	0	2		529.706	1586.09	1586.78	3	0.3249	204.7	1818	1830	TRUE	gi|24584700,gi|24584706,gi|24584710,gi|24584702,gi|24584712,gi|24584698
Myosin heavy chain CG17927-PA, isoform A [Drosophila melanogaster]	gi|24584704,gi|28574239	224597	1	128	186	2330	0.0109	0.549	TRUE	A9.4365.4365.2.dta	ImSWmQAWAR	K	G	0.95	34.8	36.3	0	2	m2: Oxidation (+15.99), m5: Oxidation (+15.99)	656.042	1310.07	1311.6	2	-0.5223	-398.4	783	792	TRUE	gi|24584700,gi|24584706,gi|24584710,gi|24584702,gi|24584712,gi|24584698
Myosin heavy chain CG17927-PA, isoform A [Drosophila melanogaster]	gi|24584704,gi|28574239	224597	1	128	186	2330	0.0109	0.549	TRUE	S_G1.5039.5039.2.dta	NKDPLNDTVVDQFK	K	K	0.95	34.8	36.5	0	2		817.049	1632.08	1632.82	2	0.2661	162.9	597	610	TRUE	gi|24584700,gi|24584706,gi|24584710,gi|24584702,gi|24584712,gi|24584698
Myosin heavy chain CG17927-PA, isoform A [Drosophila melanogaster]	gi|24584704,gi|28574239	224597	1	128	186	2330	0.0109	0.549	TRUE	S_G1.6755.6755.2.dta	ATSVRPQFDGLAFPPR	R	F	0.95	34.8	36.4	0	2		879.872	1757.73	1758.93	2	-0.1936	-110.1	1938	1953	TRUE	gi|24584700,gi|24584706,gi|24584710,gi|24584702,gi|24584698
terribly reduced optic lobes CG33950-PF, isoform F [Drosophila melanogaster]	gi|78706474	513388	1	89	107	871	0.00408	0.237	TRUE	S_E912.3467.3467.3.dta	GSGRPVNGPDVIITGNR	R	F	0.95	34.8	36.6	0	2		570.443	1708.3	1708.91	3	0.4029	235.7	1953	1969	TRUE	gi|161077537
sallimus CG1915-PC, isoform C [Drosophila melanogaster]	gi|161080703	2.06604e+06	1	83	86	363	0.0017	0.0614	TRUE	S_F2.5601.5601.2.dta	TLDLDTLDAQR	K	L	0.95	34.8	36.8	0	2		631.193	1260.37	1260.64	2	0.7348	582.5	2054	2064	TRUE
CG32702 CG32702-PA [Drosophila melanogaster]	gi|24640838	411066	1	55	57	276	0.00129	0.175	TRUE	S_F1.4268.4268.2.dta	NGNDEDSPFLGR	R	G	0.95	34.8	36.5	0	2		661.209	1320.4	1320.58	2	0.8285	627	2144	2155	TRUE
zormin CG33484-PD, isoform D [Drosophila melanogaster]	gi|116007762	411353	1	35	37	226	0.00106	0.131	TRUE	S_F2.3813.3813.2.dta	IPLITEK	K	I	0.95	34.8	36.1	0	2		407.224	812.432	813.509	2	-0.06932	-85.22	2565	2571	TRUE
CG4389 CG4389-PB, isoform B [Drosophila melanogaster]	gi|24583077,gi|24583079	79622	1	27	31	210	0.000983	0.423	TRUE	S_F9.3730.3730.2.dta	GFGELSATPESK	K	G	0.95	34.8	36.3	0	2		611.802	1221.59	1222.6	2	0.0007694	0.6293	299	310	TRUE
CG4389 CG4389-PB, isoform B [Drosophila melanogaster]	gi|24583077,gi|24583079	79622	1	27	31	210	0.000983	0.423	TRUE	S_F910.3696.3696.2.dta	GTRPVNNDALEIVK	R	Q	0.95	34.8	36.4	0	2		762.87	1523.72	1525.83	2	-1.101	-722.3	618	631	TRUE
CG4389 CG4389-PB, isoform B [Drosophila melanogaster]	gi|24583077,gi|24583079	79622	1	27	31	210	0.000983	0.423	TRUE	S_F912.6453.6453.1.dta	DTIAQAVAVGLK	K	Q	0.95	34.8	37.1	0	2		1186.57	1185.56	1185.68	1	0.8841	745.1	493	504	TRUE
[truncated: 42,883 more rows]
