# Supplementary material for: A Mighty Small Heart: The Cardiac Proteome of Adult Drosophila melanogaster
Source: PLoS One. 2011 Apr 25;6(4):e18497. doi: 10.1371/journal.pone.0018497 (PMC3081823; doi:10.1371/journal.pone.0018497)
Supplement: Table S3 — Spectra ST Matches All proteins identified on the basis of a single peptide, regardless of the number of assigned spectra, were cross-referenced against a reference Drosophila peptide dataset as described in the Methods section and Methods S1. Panel 1: The specific criteria for inclusion in these tables are presented. All other panels: Output from Spectra ST searches showing matches between our query spectra and the reference spectra. (XLSX) [file pone.0018497.s003.xlsx]

## Sheet: Criteria
Criteria for inclusion in this table
All proteins identified on the basis of a single unique peptide (>90%) by Scaffold (i.e.Mascot or X!Tandem validated by Peptide Prophet), regardless of the number of spectra, were cross-referenced against the repository of Drosophila proteotypic peptides (Brunner et al.) at the National Institutes of Standards and Technology (NIST) using the web application Spectra ST (Lam et al.), hosted at the …
If the results from spectral matching confirmed the assignment from Scaffold (using Mascot and/or X!tandem and validated with Peptide Pilot), the results were included in this table.
If the high-quality query did not match any reference spectrum with high probability, the spectrum was included in the "High-Quality Spectra" Table S4.
If the high-quality query matched a different protein with high confidence, the query protein was deleted from the master list of proteins.
Format of the table
The peaklist (m/z followed by peak intensity) for the highest-scoring (Mascot or X!Tandem) peptide match is presented in column A.
The output from Spectra ST is presented next to the peaklist. The consensus (reference) spectrum appears on top. The query appears as a mirror image below the reference spectrum.
The peaklist file and name of the identified protein are listed in column D.
The results of the Spectra ST search are displayed below the protein name.
References
Brunner E, Ahrens CH, Mohanty S, Baetschmann H, Loevenich S, Potthast F, Deutsch EW, Panse C, de Lichtenberg U, Rinner O, Lee H, Pedrioli PG, Malmstrom J, Koehler K, Schrimpf S, Krijgsveld J, Kregenow F, Heck AJ, Hafen E, Schlapbach R, Aebersold R. A high-quality catalog of the Drosophila melanogaster proteome. Nat Biotechnol. 2007 May;25(5):576-83. Epub 2007 Apr 22.
Deutsch EW, Lam H & Aebersold R. PeptideAtlas: a resource for target selection for emerging targeted proteomics workflows, EMBO Reports (2008) 9, 5, 429–434
Lam H, Deutsch EW, Eddes JS, Eng JK, King N, Stein SE & Aebersold R. Development and validation of a spectral library searching method for peptide identification from MS/MS. PROTEOMICS (2007) 7(5):655-667.

## Sheet: CG4278
1455.2436730169754 2
226.944 16.55
230.044 8.29
236.906 12.16
237.181 10.46
246.206 12.78
256.635 9.66
275.413 17.46
287.399 8.12
288.496 9.04
295.334 15.23
296.266 22.06
315.036 8.25
319.39 12.29
322.111 12.37
323.154 9.52
329.089 35.55
336.625 12.14
340.328 18.3
348.267 10.66
349.048 11.24
350.988 14.77
359.398 18.15
370.238 8.32
375.389 43.01
381.12 13.33
384.321 10.58
389.409 7.93
391.174 9.94
397.0445 9.63
398.941 13.38
411.263 16.41
413.691 9.58
418.22083 17.6
423.15536 18.98
424.934 23.09
426.616 10.67
428.277 12.41
429.162 11.86
430.26044 28.49
437.137 8.53
442.237 723.6
443.095 9.65
455.014 23.62
458.155 8.35
460.07 13.11
463.281 45.36
464.31314 21.08
465.253 18.81
469.622 14.15
479.887 23.29
481.288 14.86
484.068 10.36
486.499 17.66
488.48 52.94
489.315 28.66
490.497 8.69
494.388 14.33
498.227 11.1
504.36 15.26
507.164 44.79
507.855 14.11
509.526 18.09
512.151 9.08
515.335 8.19
521.151 13.26
525.246 11.12
529.416 12.87
534.516 13.01
537.69 44.78
538.063 17.83
539.464 18.06
540.997 15.07
542.316 8.99
543.4 17.51
544.485 13.3
547.543 12.91
553.15 41.13
554.996 23.65
555.691 8.61
557.0692 12.42
559.028 8.41
560.352 14.04		S_E7.6549.6550.2.dta
562.143 13.24
563.123 18.17		CG4278 CG4278-PA [Drosophila melanogaster]
563.393 15.98
564.656 9.01
569.314 10.54
571.365 197.7
572.476 12.55
577.056 8.57
577.794 17.42
578.364 35.41
580.257 15.83
583.13 16.54
584.187 18.09
585.652 18.61
588.299 17.94
590.23 15.19
591.01 10.44
592.298 15.02
595.614 21.87
596.987 14.89
599.397 13.65
600.3192 13.89
605.873 100.7
609.264 16.28
613.463 7.94
614.797 373.7
615.58417 37.28
616.682 11.2
617.802 12.46
618.285 12.71
618.857 34.42
621.002 9.54
621.7082 17.97
624.912 33.38
625.723 20.27
626.651 9.3
629.3105 19.98
637.24 37.65
637.897 13.88
644.396 21.15
645.279 21.22
645.758 12.18
648.243 10.64
649.782 17.44
652.049 17.19
653.156 29.3
653.878 24.91
656.701 38.02
657.642 18.95
659.328 15.66
661.447 31.26
661.825 11.13
662.56 11.89
663.702 41.05
664.505 13.11
666.64746 10.11
668.078 9.9
668.513 20.61
669.045 23.53
669.477 28.14
670.306 88.19
671.3913 78.8
672.4651 178.2
673.407 26.37
674.459 35.21
675.649 9.65
676.3 12.41
681.4674 61.22
682.501 70.66
683.262 13.75
683.59 10.2
684.504 27.67
686.027 20.74
688.015 8.8
688.355 39.31
689.347 18.01
691.44 19.39
692.638 11.68
693.372 56.33
694.473 19.82
696.187 58.63
697.04065 24.2
697.894 20.44
699.166 13.79
701.3187 20.91
703.656 14.16
704.208 22.49
704.844 39.48
705.174 34.92
705.678 38.46
706.244 26.21
709.311 194.6
709.9256 146.4
710.62646 144.8
711.54407 47.96
713.004 15.91
713.871 8.41
714.154 36.89
716.147 74.36
718.311 114.6
718.913 795.4
719.647 145.4
722.398 9.37
739.348 17.5
743.804 8.73
746.357 14.35
747.225 9.42
748.229 10.64
751.04 9.17
752.503 13.57
758.798 18.98
762.48193 48.35
764.224 14.82
765.383 42.92
766.253 96.44
771.241 9.33
778.313 12.07
781.92 9.27
783.3412 53.98
784.47 25.96
785.048 77.56
785.498 12.81
785.795 88.18
789.073 18.28
793.425 17.68
798.235 8.19
799.353 17.4
802.531 8.55
811.511 12.13
832.073 11.18
839.512 8.78
848.268 11.22
849.394 44.69
853.288 13.94
854.343 25.2
855.455 17.56
866.2089 100.0
867.26263 87.97
868.535 30.69
870.599 39.15
872.382 18.22
877.44543 111.0
878.24 10.15
882.3851 19.77
884.261 40.8
885.275 25.65
887.495 17.95
891.781 9.22
892.601 26.8
895.314 24.6
900.417 116.2
900.702 16.52
901.962 17.15
907.831 16.61
908.574 14.21
912.386 13.4
913.451 8.89
920.623 29.12
929.659 17.95
933.47864 8.75
934.546 30.64
945.571 8.14
948.563 107.9
949.408 92.89
950.959 24.7
953.63684 19.6
954.41 28.35
967.516 139.5
970.418 16.16
977.45685 51.09
978.298 40.2
979.274 50.53
984.455 8.49
985.426 48.92
995.378 219.1
996.56476 121.1
1013.308 497.3
1014.594 182.6
1020.327 19.48
1026.049 16.15
1049.844 11.3
1056.014 12.66
1080.4 14.99
1082.089 9.07
1085.774 11.87
1096.445 16.92
1097.367 14.51
1098.459 29.74
1112.214 16.71
1115.518 313.8
1133.546 29.51
1162.281 12.34
1174.357 10.23
1178.27 16.8
1179.025 42.14
1180.474 36.18
1182.609 14.59
1192.69 36.73
1195.06 34.67
1197.098 11.47
1209.717 70.15
1210.668 11.51
1211.818 7.99
1228.544 259.8
1229.581 29.31
1232.396 20.85
1242.376 18.53
1273.502 10.02
1280.473 19.24
1289.986 35.18
1290.6 42.57
1291.311 35.96
1308.5739 275.0
1309.837 8.7
1310.709 26.72
1328.841 12.31
1352.534 12.02
1352.95 25.61

## Sheet: CG12203
1412.7666730169753 2			S_F6.2968.2968.2.dta
209.137 5.34
217.05 6.07			CG12203 CG12203-PA [Drosophila melanogaster]
224.923 37.59
226.172 35.89
226.861 15.68
228.166 2.58
230.989 11.03
240.059 8.32
241.058 27.44
243.768 6.98
251.285 12.67
251.953 20.41
256.212 13.88
257.959 3.55
263.016 37.21
267.1 46.71
268.067 85.88
268.868 26.02
269.497 38.08
270.216 15.1
277.218 3.77
284.172 9.6
285.403 86.51
286.251 168.2
287.371 10.7
303.227 1000.0
304.235 121.3
305.511 9.69
307.678 19.37
309.428 12.17
312.386 6.33
316.212 4.69
317.425 8.03
324.285 63.97
324.965 3.69
329.332 17.78
336.302 5.4
338.17 25.07
354.136 10.89
355.436 6.29
357.198 36.96
358.116 2.63
360.343 14.87
372.199 9.22
373.834 8.05
380.134 4.3
382.535 12.84
396.607 7.88
397.341 3.89
399.609 14.71
400.397 5.11
410.876 4.96
414.253 12.61
415.533 8.21
423.684 3.37
426.374 11.1
432.164 48.49
441.517 3.09
442.356 23.76
443.149 22.02
451.349 6.58
453.014 7.87
469.457 25.74
470.093 13.43
477.397 37.04
478.046 3.79
484.318 9.6
485.63 5.83
486.589 21.44
491.888 32.9
493.281 4.48
495.385 7.54
496.723 20.3
497.437 15.11
510.4 6.66
511.411 30.98
512.834 69.89
513.449 237.6
514.322 74.22
515.445 21.62
518.855 14.02
520.706 39.91
522.451 7.38
523.323 2.59
528.196 32.61
528.811 68.87
529.55 16.24
535.39 15.24
537.951 8.88
542.932 11.59
545.353 476.1
546.4 134.6
547.366 36.13
555.799 77.65
558.156 18.64
564.268 85.6
565.258 32.05
569.869 24.79
570.615 6.97
583.455 14.74
589.928 13.41
591.63 9.83
593.459 5.33
598.737 28.85
603.922 26.76
606.419 6.76
610.738 62.75
612.427 59.55
613.182 35.77
616.08 13.37
620.1 27.93
621.05 94.71
622.007 11.2
625.385 5.43
632.249 27.32
637.053 9.35
638.062 9.65
642.938 22.07
648.002 17.91
651.365 11.21
656.396 141.7
657.472 38.06
658.256 14.12
658.931 4.86
659.597 25.68
662.225 10.41
663.528 36.26
666.318 10.32
667.228 9.09
668.152 18.93
669.098 47.33
672.156 26.66
674.421 388.6
675.536 127.0
677.223 153.9
680.556 23.27
681.63 17.29
685.108 1383.0
685.931 391.5
686.791 5.62
687.438 3.05
688.578 14.42
689.672 134.3
690.547 37.38
691.434 6.28
692.203 18.27
695.021 49.12
695.757 5.23
698.219 884.3
699.089 328.2
700.203 11.92
700.901 4.93
703.213 2.54
711.599 10.77
714.537 11.96
721.079 3.71
722.315 28.83
723.257 9.77
726.25 13.88
727.668 6.44
739.403 510.2
740.411 175.2
741.543 11.91
743.158 11.85
744.979 11.64
757.321 2.97
759.354 8.04
763.204 19.49
767.356 11.27
768.475 3.33
785.337 6.59
786.519 4.9
800.521 5.13
802.624 8.43
803.834 24.17
804.729 14.48
808.38 5.74
809.348 3.63
810.193 9.26
811.917 7.3
812.689 3.96
813.585 6.63
814.208 11.67
817.466 12.74
823.004 7.01
824.035 5.29
824.671 27.35
825.404 5.13
832.624 20.46
838.42 8.04
840.383 22.46
841.448 16.84
842.451 13.95
848.515 4.9
849.294 3.73
851.344 6.41
852.465 13.54
853.662 9.94
861.336 5.72
864.257 5.61
865.621 7.87
868.468 540.5
869.446 350.4
870.57 38.45
880.446 10.49
882.337 10.73
883.304 54.16
884.248 23.42
885.74 8.57
888.667 4.91
893.836 4.75
900.459 810.2
901.437 368.3
902.58 130.5
904.298 3.31
928.432 31.93
932.234 11.31
935.326 3.44
937.787 11.92
938.567 4.94
947.381 19.61
953.548 54.63
954.604 13.36
958.909 40.71
959.624 19.19
963.824 6.81
965.784 7.37
971.439 5.85
980.337 26.6
981.583 210.7
982.624 156.8
983.73 36.45
996.401 12.92
997.297 24.02
998.33 6.21
999.619 3.28
1014.626 14.14
1021.381 15.73
1033.259 5.54
1038.506 18.66
1039.553 80.94
1040.603 35.8
1049.405 7.77
1050.539 4.99
1051.896 19.54
1056.45 7.7
1057.719 8.04
1064.509 2.76
1066.593 90.57
1067.688 37.91
1068.551 28.96
1069.475 8.86
1076.151 8.73
1081.791 15.63
1082.607 41.96
1083.734 29.4
1084.696 51.71
1089.026 5.87
1091.749 7.63
1093.66 28.13
1094.609 6.72
1110.505 1969.0
1111.521 1041.0
1112.714 195.8
1116.845 9.96
1128.651 4.95
1137.759 11.96
1138.4 29.36
1147.815 2.99
1149.798 23.29
1152.392 15.33
1158.79 8.27
1159.529 8.6
1164.327 5.71
1170.492 15.09
1182.36 10.51
1187.687 7.38
1194.673 19.61
1196.067 2.77
1199.634 7.16
1206.755 9.65
1210.634 34.84
1212.523 14.46
1220.488 5.52
1222.105 21.3
1223.526 15.66
1224.549 11.88
1225.458 7.36
1229.211 6.57
1233.852 8.61
1238.515 241.9
1239.593 146.4
1240.616 75.75
1255.267 2.9
1256.653 37.61
1257.476 40.83
1258.866 5.91
1262.698 15.58
1268.375 13.6
1353.981 12.5

## Sheet: CG11315
1726.7436730169754 2			S_F5.3469.3469.2.dta
246.117 32.43
282.993 4.55			CG11315 CG11315-PA, isoform A [Drosophila melanogaster]
294.333 7.41
309.361 9.3
317.23 3.25
327.093 4.21
331.388 3.87
340.368 6.62
341.009 4.8
344.291 3.44
345.324 8.17
361.296 16.83
362.336 5.21
372.853 6.67
383.229 13.7
403.571 3.98
405.257 7.97
419.048 4.76
420.436 24.35
422.227 2.85
426.862 11.46
430.365 2.26
432.61 6.02
436.286 3.61
437.174 5.94
438.309 11.42
448.15 3.18
455.264 5.65
456.688 7.19
458.425 7.04
473.279 20.9
477.126 4.11
479.036 2.63
490.146 1.21
498.156 12.57
502.329 10.36
511.264 4.97
512.179 4.21
516.984 4.3
529.22 852.6
530.284 90.3
530.944 1.02
539.332 14.45
546.271 9.21
548.441 10.72
549.446 9.71
550.224 5.15
554.877 12.84
556.426 22.97
557.603 6.59
562.572 11.94
574.238 26.55
583.377 7.54
591.302 4.02
592.479 9.01
597.131 2.21
602.075 10.19
609.395 6.02
610.688 26.21
611.343 51.37
614.563 3.94
618.884 20.21
620.313 11.93
624.41 3.89
632.815 8.72
641.49 2.21
642.595 2.69
643.68 12.07
648.542 13.93
653.385 6.08
660.501 145.3
661.411 34.76
662.402 8.81
674.34 11.36
678.332 21.43
679.368 4.48
682.291 14.15
684.137 2.49
691.324 33.81
692.045 21.56
701.315 14.76
702.318 11.89
706.281 7.13
707.414 5.55
713.13 10.6
719.367 94.75
720.187 56.44
721.63 6.17
726.555 4.02
733.155 67.0
734.33 27.32
736.448 13.08
737.197 30.61
737.927 15.39
741.979 94.53
746.452 10.08
747.964 4.65
754.358 12.65
755.697 26.87
756.722 10.77
759.249 7.49
761.178 12.53
762.047 15.53
769.668 13.62
772.38 14.24
774.471 108.7
775.59 17.68
777.213 17.83
786.98 7.43
789.282 9.84
791.157 7.1
792.62 3.0
795.445 8.42
798.453 6.7
799.458 4.12
801.703 12.18
802.6 11.08
803.367 14.38
805.378 10.39
811.578 9.83
815.343 8.9
817.03 21.03
820.353 6.77
821.205 15.05
822.658 36.12
824.174 27.06
826.883 8.86
827.981 11.4
830.937 5.82
837.294 29.11
838.441 17.43
839.407 9.45
841.472 13.9
842.768 3.57
845.078 83.31
845.885 209.4
846.593 38.11
848.671 6.11
850.829 3.27
854.243 344.1
854.953 276.2
855.625 77.51
883.608 10.13
884.221 11.42
887.019 9.62
888.366 80.15
889.595 10.85
899.543 10.83
913.075 8.75
917.388 26.05
923.408 4.85
934.516 43.35
935.795 33.45
936.747 19.94
940.529 11.35
942.232 2.33
944.218 1.72
952.579 31.48
953.343 5.33
956.321 13.73
962.184 6.25
972.371 17.39
982.252 20.85
987.41 2.09
989.518 242.7
990.418 68.4
991.079 4.85
991.908 11.32
1011.674 6.59
1013.598 6.5
1019.593 7.45
1029.722 8.67
1031.167 29.21
1031.99 15.86
1032.691 34.61
1033.513 2.55
1035.087 16.64
1046.062 6.4
1047.457 20.72
1049.37 49.75
1050.447 13.4
1051.185 5.59
1052.962 17.85
1058.8 2.75
1066.494 18.68
1067.64 32.79
1082.395 1.94
1085.6 4.55
1088.31 8.7
1097.999 15.54
1098.684 3.6
1105.106 4.06
1107.065 4.82
1110.118 3.21
1116.176 38.54
1116.85 1.24
1119.563 6.23
1133.021 10.14
1135.575 13.28
1137.433 2.26
1145.267 27.98
1146.318 17.18
1152.62 116.3
1153.668 47.55
1154.476 19.94
1161.674 8.27
1162.409 82.08
1163.441 41.14
1164.349 15.41
1165.476 4.3
1170.193 31.24
1173.379 10.73
1179.384 113.0
1180.316 258.5
1181.387 101.1
1182.474 3.06
1193.341 7.34
1197.226 499.5
1198.267 205.8
1199.205 17.17
1213.268 6.75
1226.293 12.46
1235.83 9.58
1236.597 1.94
1253.477 115.3
1254.487 43.1
1255.598 6.27
1282.08 3.0
1290.953 10.8
1292.979 22.34
1294.373 8.24
1295.174 10.64
1329.599 10.97
1332.401 10.74
1347.554 8.94
1363.455 3.99
1364.754 43.39
1365.996 13.96
1377.854 2.67
1382.662 24.88
1395.455 3.99
1396.562 4.85
1397.812 6.48
1433.751 11.04
1445.205 22.07
1452.598 4.09
1462.064 3.34
1463.516 46.89
1464.377 15.93
1465.702 14.15
1480.323 117.0
1481.551 8.28
1483.944 7.42
1529.429 3.78
1532.669 16.55
1533.53 39.53
1534.537 38.78
1535.372 17.72
1551.386 67.11
1552.693 23.01
1553.456 5.71
1560.404 5.6

## Sheet: Spase 18 21-subunit CG2358-PA 
890.3904730169754 2			S_F6.5195.5195.2.dta
129.139 21.69
130.129 14.13			Spase 18/21-subunit CG2358-PA [Drosophila melanogaster]
132.008 4.82
132.634 2.95
147.147 48.74
148.208 1.86
157.117 309.9
158.076 1.2
163.23 4.11
170.067 21.1
171.162 3.07
173.194 1.31
175.201 16.43
177.044 12.67
181.05 2.12
182.211 9.13
187.216 46.61
197.153 9.34
198.175 2.75
209.152 13.37
212.963 5.78
214.259 28.8
218.179 1.85
219.922 5.73
223.179 15.43
227.567 16.83
228.305 3.09
230.158 17.59
231.098 26.47
233.107 5.32
235.036 6.04
240.903 5.27
243.081 21.36
244.299 6.45
247.152 9.61
249.205 8.78
251.12 6.31
252.944 3.32
256.157 1.93
257.562 12.95
258.178 72.6
259.3 14.49
260.305 18.25
260.998 7.92
262.156 4.26
265.275 3.49
269.289 6.86
272.322 13.79
274.244 1.58
275.154 8.26
276.158 15.39
276.918 7.71
279.105 2.43
281.622 22.6
286.028 219.1
287.294 19.27
289.349 1.89
290.269 7.61
291.758 8.6
293.404 32.45
294.23 321.2
295.261 19.38
296.146 6.66
297.106 1.85
298.176 17.64
299.228 22.89
300.176 23.94
301.429 10.64
302.508 2.22
303.3 6.07
304.089 12.15
307.184 29.03
310.138 10.86
312.424 11.1
313.335 14.8
314.54 22.13
315.22 4.05
316.164 11.13
317.175 6.47
318.889 7.62
320.069 20.43
321.132 5.7
322.101 12.5
323.242 19.09
324.081 7.39
326.242 5.71
327.233 3.28
328.068 5.59
329.15 7.25
331.239 48.06
332.042 11.56
333.221 9.43
335.275 17.22
336.317 6.22
339.237 9.26
340.635 4.57
341.544 12.89
342.335 12.76
342.976 30.02
344.383 4.81
345.255 6.03
347.13 13.62
349.165 3.92
352.009 32.28
353.239 15.92
354.151 7.6
355.094 9.95
355.878 12.36
356.937 17.78
358.312 208.9
359.038 81.37
360.226 46.07
362.311 7.11
363.097 14.67
364.157 2.2
366.368 28.72
367.241 19.71
367.934 19.52
369.294 11.29
370.083 9.0
371.044 99.28
372.285 7.53
373.34 1.53
373.977 4.61
375.203 13.59
376.227 9.61
381.07 27.66
382.128 8.54
383.126 4.22
384.301 21.82
385.047 21.03
386.947 8.5
388.997 13.57
391.269 5.13
393.19 310.8
394.044 15.91
394.668 3.09
395.27 6.23
399.154 184.5
400.242 68.99
400.932 1.22
402.232 24.46
403.117 17.06
406.595 43.95
407.991 23.49
409.549 58.8
410.369 20.22
411.991 5.76
413.608 38.35
415.151 169.7
416.443 41.28
417.4 53.06
418.037 1.2
418.922 14.44
420.19 3.69
421.634 36.72
423.12 89.75
424.322 41.1
425.051 3.82
427.131 201.6
428.927 2881.0
430.186 163.7
430.999 30.31
431.678 10.79
432.442 20.92
433.474 34.91
434.245 20.62
435.897 208.8
437.0 371.7
437.772 7.49
439.053 89.45
440.301 37.07
443.675 10.76
447.815 1.65
453.222 5.92
456.155 4.39
457.613 3.25
461.387 1.89
463.061 2.91
464.197 7.15
466.14 4.17
467.977 3.54
470.117 24.54
480.176 20.88
481.864 3.55
484.405 13.88
487.855 11.12
492.328 482.8
493.415 56.68
498.272 195.4
499.293 15.14
501.746 1.54
503.311 10.88
505.35 12.74
507.191 23.64
508.364 29.18
514.307 9.34
516.847 8.28
530.5 12.58
535.737 1.12
537.782 7.07
543.342 10.31
544.416 12.63
546.377 2.43
548.407 16.38
551.522 6.06
552.428 8.52
553.249 11.31
554.166 2.1
556.504 7.98
567.374 11.75
568.451 17.64
569.384 23.71
570.17 1.38
571.44 18.73
579.177 30.21
580.29 13.69
582.322 22.82
584.067 12.09
592.231 15.92
597.264 165.5
598.36 13.84
603.339 34.24
605.312 723.5
606.369 103.7
616.42 8.0
619.023 13.72
620.593 2.86
624.177 3.7
630.16 31.95
631.387 29.53
632.333 28.11
634.382 6.46
636.368 2.59
637.4 10.5
645.271 30.84
646.391 18.54
648.589 1.95
662.806 17.62
663.703 10.63
676.417 2.34
682.033 25.99
687.446 16.01
691.717 5.41
692.814 19.42
700.066 2.07
715.182 5.63
716.44 19.67
717.739 20.29
719.613 1.77
721.273 16.55
723.624 2.12
726.56 4.45
732.493 15.68
734.379 1182.0
735.502 222.2
744.092 113.1
745.33 62.73
753.629 6.62
754.543 15.86
757.554 4.07
761.285 8.14
762.831 4.46
773.462 6.47
777.428 8.13
791.386 1240.0
792.486 167.0
794.587 2.23
801.233 8.35
829.37 11.73

## Sheet: Dak1
1478.3086730169755 2			S_E6.5647.5647.2.dta
218.068 2.27
221.185 9.82			Dak1 CG6092-PA [Drosophila melanogaster]
228.107 2.36
235.443 1.65
237.151 5.15
239.276 5.84
250.28 9.81
260.277 59.29
268.275 10.0
273.107 11.97
276.216 12.42
278.099 18.85
278.892 1.68
284.019 8.31
285.347 2.55
290.335 4.67
291.207 5.52
295.968 4.5
297.949 1.82
299.937 4.14
301.879 2.17
306.562 8.95
308.314 12.71
319.084 3.62
324.254 6.33
328.471 4.45
341.594 13.55
342.426 15.91
343.615 3.67
351.997 6.47
352.98 5.86
357.25 6.34
359.285 37.3
360.481 9.32
361.302 11.89
370.061 6.75
373.297 13.31
376.357 6.19
377.964 3.45
383.021 13.49
388.364 8.64
391.471 9.01
407.414 16.78
413.246 2.55
416.211 11.11
420.187 5.35
430.174 10.29
437.508 6.01
439.115 4.37
442.287 8.52
446.48 7.71
447.144 22.71
448.669 27.81
452.518 16.57
457.844 15.3
463.181 5.31
465.827 3.91
468.241 2.47
470.286 458.2
471.333 26.7
472.033 2.31
474.392 10.5
482.401 9.11
483.222 8.35
486.479 4.94
494.029 2.78
507.133 2.79
508.116 11.27
509.21 6.38
511.247 1.93
512.058 26.16
517.26 7.32
520.052 10.25
526.187 5.18
528.155 3.97
530.396 8.47
531.188 7.62
534.979 3.94
545.514 21.62
551.194 8.2
555.93 22.06
557.845 19.77
559.331 13.52
561.365 16.88
563.365 5.5
565.58 4.46
571.365 10.78
574.501 15.03
579.937 25.02
581.538 7.58
583.446 81.73
588.323 3.5
588.997 23.11
589.683 17.52
591.211 7.38
597.693 6.78
599.427 25.9
602.99 1.85
609.137 3.54
611.194 11.53
611.971 3.21
613.084 7.8
614.341 2.98
617.117 6.96
619.025 8.31
621.005 9.52
621.62 26.63
623.266 8.63
623.878 9.23
627.346 7.87
630.336 322.1
631.051 58.31
633.41 6.25
637.646 2.75
639.264 318.3
640.105 48.57
640.856 2.54
641.986 6.67
645.476 8.87
646.285 21.37
648.13 3.67
649.308 16.81
651.399 3.13
652.323 5.8
653.687 6.57
654.447 3.43
658.097 21.07
659.168 17.35
660.064 6.65
661.297 14.01
665.105 10.17
665.9 4.53
666.812 2.59
670.382 24.92
672.265 31.54
674.206 42.4
675.761 31.43
676.367 41.49
677.419 4.71
679.076 54.82
682.809 5.76
683.434 8.55
684.567 10.17
686.576 11.78
688.177 18.23
693.382 10.18
695.674 40.48
698.555 5.97
699.306 7.09
700.713 18.29
701.5 2.59
702.733 17.44
703.608 1.88
704.223 21.17
706.801 6.79
708.214 37.34
709.39 14.97
712.324 29.21
713.102 54.67
716.569 9.57
721.406 690.9
722.396 243.7
723.451 1.25
724.586 21.08
725.803 6.26
730.284 376.8
731.106 164.1
732.367 4.48
737.289 2.39
738.381 1.89
745.917 21.28
759.494 2.22
764.277 11.65
772.382 9.58
773.353 7.22
781.573 4.59
785.108 41.53
785.885 12.04
790.312 22.85
791.194 30.99
799.489 9.06
806.8 5.01
808.172 37.77
813.533 5.14
824.153 7.62
825.266 5.83
832.094 5.24
837.42 5.02
841.323 2.7
842.564 18.54
843.433 9.38
859.666 25.58
860.42 38.98
861.475 14.84
867.89 16.81
874.486 8.99
877.275 51.57
879.066 52.92
882.379 18.07
890.158 11.87
891.467 2.25
895.229 18.56
899.551 29.68
900.323 20.22
903.463 13.79
910.626 3.91
919.245 3.8
921.233 9.15
923.54 2.95
927.743 21.86
930.762 11.52
944.614 15.14
945.272 13.52
946.204 10.94
947.29 13.36
950.261 2.37
955.394 47.75
956.309 30.06
963.591 10.5
967.882 2.52
968.878 7.4
972.247 52.27
973.253 120.6
974.316 49.01
980.306 28.21
984.161 8.13
986.249 3.52
989.6 14.45
990.287 69.9
991.33 90.01
992.15 74.2
992.817 16.22
995.199 4.22
996.407 31.25
998.771 3.2
1001.947 11.85
1008.266 196.9
1009.138 18.8
1009.755 4.92
1012.88 42.93
1013.595 125.4
1016.559 23.68
1022.826 2.56
1031.979 2.46
1033.614 3.7
1046.887 5.27
1067.141 11.41
1079.506 6.37
1087.399 7.76
1090.531 28.66
1091.178 8.56
1096.704 3.33
1098.598 2.48
1105.081 7.54
1106.603 3.49
1113.467 7.47
1115.834 3.37
1119.237 71.33
1120.373 21.24
1121.0 10.72
1142.475 7.28
1147.606 3.93
1160.339 2.0
1176.562 105.7
1177.938 15.29
1178.727 5.52
1179.576 22.04
1181.966 10.81
1183.402 12.26
1184.247 4.77
1193.838 3.38
1196.887 13.68
1200.557 6.58
1202.196 6.48
1210.463 22.92
1216.249 12.08
1218.476 76.34
1219.583 7.06
1229.631 2.77
1230.827 10.55
1235.32 7.27
1243.393 11.89
1245.126 7.29
1246.635 16.64
1262.372 6.0
1273.592 3.51
1277.391 33.34
1287.559 6.92
1297.709 12.14
1301.26 10.24
1301.912 20.71
1313.818 26.82
1314.703 14.03
1315.356 7.35
1331.434 116.8
1332.72 35.55
1347.516 13.26

## Sheet: CG11858
1327.4686730169753 2			S_E4.4606.4606.2.dta
199.024 17.2
212.217 7.81			CG11858 CG11858-PA [Drosophila melanogaster]
217.249 8.11
220.74 7.24
227.103 30.51
227.942 2.75
229.992 14.76
238.074 26.98
244.053 15.81
245.132 43.92
245.939 5.87
253.936 12.11
262.14 58.55
263.146 11.35
272.55 8.52
273.187 8.78
274.815 4.23
276.373 12.38
277.262 2.83
277.905 8.89
282.19 22.87
283.598 6.02
284.789 10.15
285.395 5.31
286.212 3.03
287.94 15.16
303.937 10.68
308.369 9.12
323.235 16.1
324.3 4.41
324.991 11.6
326.266 70.0
327.254 12.1
328.916 45.66
335.255 3.74
336.08 4.99
341.106 15.03
345.343 20.36
347.339 2.23
351.055 19.7
353.092 12.11
356.419 8.8
359.218 6.4
361.426 3.43
365.348 6.27
366.221 3.06
367.328 3.32
369.133 37.38
370.191 5.09
371.227 12.98
373.88 79.55
374.935 16.36
375.675 16.92
382.325 5.49
387.411 7.56
389.161 3.13
391.16 33.27
393.588 6.65
396.007 6.16
399.318 2.35
403.181 10.78
403.827 3.97
405.97 9.33
409.422 14.21
410.401 2.37
415.162 4.93
415.841 7.44
423.873 10.12
425.321 2.32
427.987 36.35
428.676 3.06
430.52 13.01
432.295 12.29
435.131 13.36
436.18 33.15
438.21 5.94
442.079 2.47
443.152 5.0
445.178 69.58
446.411 2.67
447.217 25.21
452.561 22.34
453.2 3.08
454.496 26.57
455.488 3.38
456.396 16.73
460.609 13.32
464.402 22.51
465.733 6.74
466.581 15.6
467.991 6.54
470.316 6.77
473.382 52.48
474.236 18.33
478.349 52.75
480.477 2.68
482.42 51.66
483.552 27.47
489.289 7.64
490.585 3.79
496.483 8.39
497.353 9.84
500.415 11.78
509.014 23.56
515.699 12.01
516.338 11.98
517.337 13.0
519.232 15.4
522.706 25.74
528.6 26.29
534.101 8.57
540.347 14.42
541.174 9.04
542.428 35.34
543.315 24.17
544.255 31.93
545.333 17.81
545.977 7.8
546.773 21.86
547.759 3.3
548.557 2.36
549.432 7.89
550.364 8.59
551.487 16.16
560.614 6.05
561.43 15.39
562.548 14.79
563.423 7.98
565.351 20.73
566.424 4.22
567.451 9.24
568.914 19.88
569.523 6.94
570.169 5.89
575.349 8.41
578.09 29.3
580.65 5.36
581.497 3.59
582.474 3.21
583.561 3.89
584.946 12.43
586.995 13.25
590.263 180.5
591.013 234.1
592.689 15.47
595.149 31.21
596.25 18.98
598.456 17.41
599.563 50.63
600.17 16.28
602.496 10.4
603.572 17.54
605.73 9.81
606.583 32.54
607.739 13.15
611.037 41.59
612.089 20.32
613.214 13.62
614.956 30.15
615.593 30.93
616.691 16.36
618.805 47.7
620.418 3.59
623.505 91.44
625.699 12.29
626.419 13.13
628.161 80.46
629.094 51.11
631.675 18.12
633.115 28.01
633.781 77.18
634.41 13.67
635.234 42.05
637.242 27.44
637.915 20.11
639.206 18.27
640.265 9.9
641.467 100.0
642.645 58.38
643.497 4.42
645.08 78.32
646.078 258.0
646.997 49.96
649.426 56.65
654.974 322.0
655.745 161.4
663.278 22.97
671.444 11.69
677.415 9.53
679.19 24.64
686.286 27.83
687.507 28.02
692.971 7.54
703.454 11.64
709.312 2.36
712.398 162.3
713.321 23.83
714.707 15.72
726.734 7.92
735.907 10.35
740.177 6.59
745.665 15.49
750.095 13.92
756.593 6.87
764.506 36.77
771.216 20.68
772.432 2.27
773.721 2.1
776.174 44.23
777.298 18.19
783.289 128.0
784.184 52.81
785.486 11.85
786.254 24.11
802.069 8.52
806.22 16.74
807.228 18.6
808.02 15.14
815.799 18.19
818.866 9.2
820.947 14.81
821.681 10.5
828.118 16.33
829.664 4.46
832.348 16.85
835.594 2.12
838.87 22.45
842.462 3.68
844.437 3.83
847.534 20.68
849.232 29.0
850.37 40.51
851.547 13.78
854.342 234.0
855.354 91.67
856.491 17.26
857.466 8.56
859.177 11.9
859.972 13.62
860.713 19.5
874.986 22.05
883.202 6.37
884.728 5.95
889.012 3.45
891.881 7.51
894.485 7.83
901.383 4.84
904.394 3.9
905.088 7.99
906.661 3.95
908.586 11.51
909.704 2.46
913.413 14.0
915.684 6.54
918.66 2.52
919.628 15.19
922.387 6.97
928.997 8.84
930.426 5.35
935.474 15.6
943.1 25.7
946.417 20.81
953.183 185.0
955.406 5.3
958.487 114.9
959.304 24.9
962.229 27.07
963.234 9.35
967.481 8.15
984.544 4.31
991.156 4.1
1001.061 9.3
1008.468 10.98
1009.536 13.18
1023.355 18.47
1040.683 7.3
1042.358 3.93
1054.436 7.88
1064.45 7.04
1065.525 22.36
1067.357 8.94
1068.394 2.21
1070.773 4.4
1082.345 168.9
1083.431 22.52
1084.779 10.88
1091.504 11.86
1113.721 14.09
1114.427 5.35
1123.209 19.29
1147.487 8.09
1153.71 5.2
1179.597 22.24
1180.327 8.12
1182.216 4.17
1185.582 5.06
1198.306 10.86
1225.462 18.39
1227.207 10.68
1265.924 4.84

## Sheet: CG8199
2030.6092730169753 2			S_F910.5711.5711.2.dta
303.115 21.05
341.376 16.0			CG8199 CG8199-PA [Drosophila melanogaster]
345.339 266.7
346.348 41.94
356.589 24.0
357.318 75.97
373.092 17.84
374.206 17.14
389.347 37.43
390.678 38.39
391.516 18.74
401.215 18.24
425.379 24.16
454.604 28.97
456.893 18.88
459.057 20.86
460.297 381.6
461.173 30.64
469.035 47.0
476.258 54.02
477.195 18.46
485.233 31.83
486.201 43.09
487.15 21.05
489.289 39.71
497.635 16.75
504.155 375.0
505.22 30.6
517.25 26.22
527.451 16.25
540.704 15.78
548.227 17.14
556.331 19.11
558.419 44.88
571.555 33.51
572.22 17.14
573.316 50.02
575.33 237.2
576.412 27.85
583.079 16.93
584.445 22.24
589.289 94.9
590.347 20.55
599.241 59.51
600.33 70.78
601.263 21.56
615.201 20.33
616.685 42.94
617.376 369.1
618.241 42.1
619.394 28.32
623.183 22.76
632.565 46.4
635.281 19.25
638.417 15.79
641.042 19.1
651.393 18.74
658.407 29.25
659.442 25.73
660.418 16.15
664.184 46.91
676.351 531.0
677.383 121.7
680.568 29.58
684.631 36.52
686.399 20.87
690.307 18.37
691.081 21.6
693.493 23.5
697.493 36.78
702.128 16.32
704.245 24.55
707.82 30.82
711.186 19.19
714.059 63.62
715.153 72.97
719.452 18.38
727.344 21.06
728.423 57.88
732.203 511.5
733.386 113.2
736.515 28.79
740.4 50.63
745.922 26.04
747.221 36.8
754.7 40.11
756.496 43.28
759.321 32.06
772.549 85.99
773.55 40.19
774.589 45.48
775.393 87.65
778.412 16.41
780.227 29.72
788.599 25.9
790.44 402.9
791.451 76.76
801.368 28.41
805.439 16.35
806.398 43.59
807.113 20.66
811.312 25.32
816.062 16.03
825.311 48.95
826.448 26.11
829.29 168.2
830.405 136.6
831.663 49.12
833.453 18.69
837.478 155.3
839.144 17.57
841.594 40.77
842.407 66.19
843.378 143.8
844.96 24.21
847.371 1614.0
848.495 276.9
850.234 18.56
851.206 16.19
854.143 17.26
860.392 464.2
861.427 130.0
864.894 59.99
870.466 20.57
872.204 22.13
877.39 22.82
884.073 42.84
884.683 26.61
888.363 22.8
891.605 16.08
892.395 74.97
893.209 70.36
901.427 857.2
902.449 20.99
905.367 29.68
907.148 51.42
909.163 22.7
916.591 20.58
918.859 18.2
923.407 16.62
925.345 22.63
929.125 43.23
932.462 16.89
942.272 42.9
943.138 59.92
947.698 20.76
949.41 18.36
950.629 85.13
951.565 71.36
953.114 32.8
954.677 49.06
957.247 62.72
958.327 22.03
959.647 40.23
960.823 76.6
961.565 57.26
962.969 31.14
966.99 42.22
968.162 20.12
969.016 18.79
970.974 20.93
971.765 29.06
975.72 48.33
976.481 83.97
978.199 20.49
979.382 38.88
980.423 55.74
983.638 27.71
984.383 34.66
985.562 82.42
987.266 25.08
989.314 163.8
992.664 240.2
993.467 180.8
994.142 35.38
995.012 46.43
997.317 303.0
998.082 952.5
999.192 34.58
1000.418 40.18
1002.137 160.9
1003.33 74.72
1006.406 778.0
1007.028 386.8
1008.554 22.67
1010.531 206.2
1035.357 27.3
1036.416 21.57
1037.4 37.25
1049.248 45.64
1055.222 23.65
1068.392 25.09
1069.867 18.26
1074.511 19.44
1075.385 29.92
1090.59 35.84
1092.141 34.07
1108.496 26.32
1111.246 17.39
1112.111 26.96
1144.138 17.23
1148.238 28.46
1152.461 64.28
1153.245 114.6
1153.987 49.69
1155.301 34.01
1165.417 139.7
1166.259 100.4
1170.415 1112.0
1171.536 205.2
1178.198 19.89
1178.987 17.72
1183.311 798.5
1184.358 260.4
1189.423 22.6
1195.564 24.22
1196.588 17.59
1197.522 16.68
1212.661 42.29
1222.37 87.87
1223.311 55.23
1240.12 333.8
1240.971 51.2
1241.58 43.18
1245.343 19.61
1257.501 18.63
1259.448 16.87
1263.781 43.5
1264.536 20.71
1271.609 17.53
1274.604 23.11
1280.486 134.5
1281.487 383.5
1282.455 166.2
1298.528 702.9
1299.575 296.1
1302.412 28.47
1320.41 24.63
1329.166 19.12
1336.668 15.68
1337.819 92.7
1347.123 22.5
1354.352 249.7
1355.293 126.2
1355.9 21.89
1368.74 29.14
1377.948 29.84
1379.682 43.37
1393.12 26.17
1395.59 135.2
1396.53 194.3
1397.615 22.77
1413.5 2167.0
1414.478 788.2
1437.459 37.11
1438.33 93.09
1439.447 19.32
1442.278 27.53
1455.247 242.5
1456.491 75.69
1508.401 22.5
1509.766 52.94
1526.527 420.9
1527.657 212.5
1536.434 41.74
1539.425 18.69
1552.325 37.35
1553.537 104.5
1565.415 17.05
1570.421 260.8
1571.402 171.5
1572.015 18.92
1628.674 31.5
1655.625 15.72
1656.803 38.64
1667.388 83.49
1668.423 113.7
1669.399 52.12
1673.541 245.9
1674.708 192.0
1684.776 18.43
1685.513 291.9
1686.481 131.1
1762.419 20.63
1763.393 28.26
1770.168 26.93
1780.455 174.5
1781.485 338.6
1782.582 89.26
1785.339 19.66
1798.432 586.6
1799.481 314.7
1800.433 17.39
1820.52 17.33
1837.611 29.32
1838.486 88.99
1839.364 62.91
1840.063 28.69
1855.554 104.6
1856.69 63.31

## Sheet: CG6776
1067.5704730169755 2			S_E6.5133.5133.2.dta
167.764 4.9
168.997 159.5			CG6776 CG6776-PA [Drosophila melanogaster]
169.797 8.91
173.05 7.76
175.284 4.52
184.239 4.65
184.906 24.14
187.187 4.39
189.814 4.3
197.193 146.5
198.168 4.35
199.255 4.64
200.254 21.78
211.361 11.29
212.273 5.91
213.241 4.05
228.254 14.26
231.186 11.13
237.055 11.25
240.137 17.55
241.083 4.11
242.041 26.42
251.249 18.79
252.668 16.87
254.372 5.37
258.157 65.28
259.45 16.58
260.117 7.16
262.014 6.23
263.09 33.9
268.208 134.6
269.138 5.99
271.263 4.24
272.25 42.67
274.053 12.9
276.07 126.6
278.668 24.22
281.235 12.85
282.094 63.67
283.244 35.97
285.948 4.06
287.065 26.91
293.383 13.06
294.373 3.92
295.606 15.98
299.206 5.88
311.337 34.96
312.45 4.95
313.261 5.17
315.396 7.06
319.1 6.13
320.21 6.93
324.058 6.53
326.131 6.91
329.393 4.47
330.241 11.46
335.158 16.52
340.565 15.88
341.377 13.97
343.01 4.83
347.224 470.0
348.231 95.68
351.025 17.39
353.269 216.6
354.211 53.77
355.358 4.11
360.137 11.24
363.261 4.04
365.129 5.28
368.989 22.62
375.182 11.94
378.175 18.11
378.995 19.21
381.157 141.0
382.165 29.22
382.836 3.9
391.468 4.81
392.251 11.67
393.251 12.5
395.971 9.02
398.079 31.49
399.305 20.78
400.849 18.57
402.811 18.65
403.556 11.73
404.158 20.78
407.596 15.99
409.105 13.35
410.244 98.97
413.222 5.86
420.357 10.61
425.286 6.79
426.169 7.22
427.351 23.91
428.334 37.39
430.418 6.78
431.5 8.23
434.369 5.69
435.496 9.54
436.371 6.21
437.341 21.95
439.421 19.34
440.52 18.55
441.921 9.79
446.282 221.9
447.323 29.2
452.126 29.51
455.176 7.36
456.168 29.53
459.008 7.93
461.017 8.06
466.131 14.93
467.981 33.72
469.768 4.82
470.743 12.1
471.363 7.91
473.341 11.33
474.101 22.69
474.882 9.21
476.073 21.16
477.088 10.74
480.722 10.26
481.381 7.89
482.298 3.85
484.917 7023.0
486.147 78.33
487.015 35.46
487.623 16.47
488.614 7.71
489.372 20.28
490.237 27.73
490.931 8.14
492.037 42.05
492.638 27.62
493.595 55.27
494.45 8.6
495.66 8.08
497.666 14.02
499.007 33.8
501.175 42.09
502.311 28.2
503.441 90.54
504.356 49.79
506.106 20.97
507.187 24.19
508.365 15.51
509.326 294.7
510.394 33.41
511.254 27.56
512.139 182.5
512.797 70.31
514.549 3.81
515.584 38.74
516.193 59.51
516.959 151.2
517.576 13.4
518.527 21.14
519.345 33.13
519.971 8.78
521.607 6.5
522.348 25.02
523.255 61.4
524.231 27.75
525.073 300.4
525.774 246.4
526.429 18.51
527.529 21.86
528.16 8.7
540.917 6.47
548.724 22.58
549.583 28.54
553.382 46.94
559.424 341.3
560.425 59.23
561.143 4.11
565.05 16.59
569.348 23.68
570.58 16.71
571.368 14.77
576.309 4.52
578.217 5.97
579.234 20.0
580.36 25.43
583.238 5.08
587.506 6.17
588.896 8.38
591.201 24.8
592.236 22.79
597.519 3.91
607.602 38.91
614.355 6.58
615.995 24.45
618.17 8.53
621.84 13.18
622.467 312.9
623.264 28.33
624.609 4.86
625.558 4.33
626.198 25.72
628.482 5.3
630.748 5.1
636.565 38.77
638.137 11.96
640.117 56.43
647.909 11.24
649.268 6.87
654.796 16.5
656.697 5.49
660.386 6.05
662.244 7.94
667.243 6.86
669.397 62.55
670.418 122.2
671.549 23.75
674.573 21.4
676.389 8.96
677.296 5.98
682.151 6.43
685.412 10.68
687.334 920.4
688.298 103.6
689.339 7.61
692.522 31.19
693.612 80.53
697.466 6.58
703.704 13.79
704.505 12.42
705.332 62.46
706.517 15.8
709.646 18.75
713.451 5.19
718.448 11.97
719.687 6.27
721.315 325.4
722.202 37.4
724.388 15.58
725.257 22.67
728.238 29.36
739.656 6.77
743.684 25.32
747.696 8.47
750.735 23.56
751.478 9.6
752.746 27.74
754.586 7.34
756.448 3.84
758.438 12.82
763.122 71.43
764.371 16.64
769.539 18.65
770.952 9.31
774.318 11.14
780.361 9.34
785.653 9.44
786.389 11.35
788.444 5.14
792.211 118.3
793.735 16.32
795.135 88.32
796.36 6.21
798.733 11.63
800.485 543.6
801.465 116.2
804.289 55.17
804.986 16.44
805.73 4.83
807.678 11.73
810.961 9.79
822.546 34.36
823.279 9.81
827.487 28.86
829.888 8.31
832.355 30.37
838.523 9.84
839.153 6.64
844.739 5.18
847.5 6.17
851.108 7.14
854.276 6.56
862.776 7.55
871.417 1541.0
872.631 247.8
874.23 16.54
875.406 9.82
881.586 7.04
885.961 4.01
893.027 9.71
894.238 10.15
904.427 11.04
908.683 7.94
920.287 48.92
921.288 259.6
922.386 92.64
924.194 48.0
936.087 6.49
939.34 14.49
940.729 18.49
968.403 403.1
969.515 192.5
989.647 4.12

## Sheet: CG6126
1053.8984730169755 2			A10.4932.4932.2.dta
174.048 2.69
175.144 12.91			CG6126 CG6126-PA [Drosophila melanogaster]
175.908 5.2
181.484 2.34
183.297 12.91
185.033 10.16
186.311 5.78
189.989 3.8
200.204 2.99
201.943 3.71
210.907 12.35
213.412 16.06
217.262 1.75
227.242 11.69
228.298 16.28
234.01 1.81
238.316 4.41
239.256 5.68
242.006 7.29
242.91 12.39
246.28 1.96
247.158 8.42
249.64 2.12
254.226 4.7
257.383 7.0
261.345 3.83
263.311 3.08
266.328 8.2
268.257 3.25
269.228 6.54
270.502 6.93
271.541 3.04
285.196 6.09
290.852 20.43
293.211 6.03
294.307 9.36
295.188 26.1
297.038 6.37
300.14 1.8
301.244 2.12
303.067 8.4
304.119 1.8
309.462 3.39
322.503 40.77
324.617 7.08
327.108 2.19
328.551 5.84
333.24 3.26
335.235 8.3
336.783 2.51
338.03 3.02
339.433 6.5
343.182 11.83
346.166 4.92
347.69 1.97
351.157 1.8
353.049 3.66
357.253 2.24
359.321 11.85
364.382 9.16
365.213 4.17
366.689 7.86
367.448 4.35
371.807 11.5
372.451 7.37
377.342 8.44
380.09 8.37
381.501 18.41
382.334 8.32
383.413 12.74
388.7 16.06
390.965 7.5
393.04 2.14
398.142 43.08
399.923 3.82
405.807 20.24
407.984 20.37
416.284 33.81
417.335 18.24
419.183 3.2
421.343 28.23
423.458 5.21
426.527 52.78
427.716 3.58
429.596 23.2
431.215 32.12
434.556 58.34
435.608 47.14
437.183 9.97
440.082 74.85
440.968 6.13
444.614 9.21
446.176 4.38
448.047 3.89
449.963 3.79
451.399 10.14
454.617 24.63
456.913 1.77
461.61 8.61
464.882 14.97
467.447 46.13
469.576 21.4
470.363 11.14
471.537 7.53
473.205 12.56
474.235 14.77
475.136 79.7
478.104 3.98
480.194 8.06
482.326 25.64
483.969 15.08
485.16 7.56
488.437 40.67
489.848 2.64
491.068 11.45
492.251 29.79
493.398 8.15
494.991 27.45
496.691 46.7
497.745 14.84
501.065 9.55
502.805 8.05
503.709 20.11
504.674 61.95
505.579 45.37
506.97 24.33
508.613 50.44
509.379 63.92
510.403 7.92
511.875 22.43
513.925 12.27
514.969 26.92
515.676 35.06
517.935 275.9
518.902 58.75
519.684 14.56
526.297 7.48
537.155 7.59
538.966 5.65
539.897 7.16
541.152 5.13
544.923 24.47
546.998 6.72
548.32 14.97
549.884 12.17
550.556 47.96
551.479 23.08
553.211 11.11
559.641 13.12
564.293 15.09
567.267 14.86
573.295 18.19
573.951 2.37
574.576 3.55
581.238 17.11
586.889 17.1
589.203 1.58
595.815 1.45
598.453 11.12
599.151 16.87
600.538 16.65
602.291 12.24
607.079 2.76
619.531 9.53
623.813 17.16
625.336 4.16
626.511 15.17
627.325 15.85
630.659 9.17
632.354 6.18
637.361 107.4
638.417 41.72
639.977 9.15
643.451 5.67
645.35 4.57
657.609 9.6
661.45 18.47
663.569 9.1
666.76 5.55
671.299 5.76
672.479 26.3
673.082 9.87
677.368 28.48
679.528 11.75
683.29 5.49
686.059 4.5
688.515 2.04
690.656 4.19
691.43 12.82
693.908 13.33
694.916 17.15
696.409 32.02
700.5 13.44
705.122 28.86
712.028 9.38
713.202 5.64
716.121 6.62
717.847 22.39
720.176 10.49
721.294 5.93
723.471 4.38
724.601 3.26
725.216 5.06
731.335 13.95
735.302 17.16
740.771 4.94
743.149 5.33
745.577 7.15
749.163 2.49
750.542 14.27
751.5 3.98
770.74 3.41
771.376 2.13
772.564 4.5
777.167 6.57
780.449 11.93
782.051 1.48
785.037 4.48
786.722 5.45
790.661 6.7
791.524 4.39
798.491 12.16
799.913 6.91
807.509 54.12
808.723 38.16
809.325 17.0
811.03 4.01
825.914 9.64
826.749 18.32
827.423 8.94
828.214 18.56
838.404 2.48
840.525 7.53
841.468 23.8
842.404 41.86
849.96 2.42
864.181 12.08
868.441 5.42
869.394 10.54
870.109 2.63
873.451 5.8
878.403 28.61
879.659 24.99
880.416 10.55
887.351 6.08
890.315 11.2
895.371 4.13
896.341 1.62
899.144 21.16
921.026 7.03
936.261 7.69
947.396 1.74
986.73 5.32

[truncated: 54 more sheets: Prosbeta3 CG11981-PA, eukaryotic release factor 1 , Copper transporter 1B, Chromatin assembly factor 1, CG40451, Rab-protein 10, MRPL24, Glued CG9206-PA , jaguar CG5695-PB, CG1275, SC35 CG5442-PB, SLY-1 homologous CG3539-PD, CG9391, CG1665, Arflike at 72A CG6025-PA, CG32069, Trehalase CG9364-PD, spinster , lethal (2) 05070, CG8331 …]
