# Supplementary material for: A Mighty Small Heart: The Cardiac Proteome of Adult Drosophila melanogaster
Source: PLoS One. 2011 Apr 25;6(4):e18497. doi: 10.1371/journal.pone.0018497 (PMC3081823; doi:10.1371/journal.pone.0018497)
Supplement: Table S7 — Spectra ST Matches All proteins identified on the basis of a single peptide, regardless of the number of assigned spectra, were cross-referenced against a reference Drosophila peptide dataset as described in the Methods section and Methods S1. Panel 1: The specific criteria for inclusion in these tables are presented. All other panels: Output from Spectra ST searches showing matches between our query spectra and the reference spectra. (XLSX) [file pone.0018497.s007.xlsx]

## Sheet: Criteria
Criteria for inclusion in this table
All proteins identified on the basis of a single unique peptide (>90%) by Scaffold (i.e.Mascot or X!Tandem validated by Peptide Prophet), regardless of the number of spectra, were cross-referenced against the repository of Drosophila proteotypic peptides (Brunner et al.) at the National Institutes of Standards and Technology (NIST) using the web application Spectra ST (Lam et al.), hosted at the …
If the results from spectral matching confirmed the assignment from Scaffold (using Mascot and/or X!tandem and validated with Peptide Pilot), the results were included in this table.
If the high-quality query did not match any reference spectrum with high probability, the spectrum was included in the "High-Quality Spectra" Table S4.
If the high-quality query matched a different protein with high confidence, the query protein was deleted from the master list of proteins.
Format of the table
The peaklist (m/z followed by peak intensity) for the highest-scoring (Mascot or X!Tandem) peptide match is presented in column A.
The output from Spectra ST is presented next to the peaklist. The consensus (reference) spectrum appears on top. The query appears as a mirror image below the reference spectrum.
The peaklist file and name of the identified protein are listed in column D.
The results of the Spectra ST search are displayed below the protein name.
References
Brunner E, Ahrens CH, Mohanty S, Baetschmann H, Loevenich S, Potthast F, Deutsch EW, Panse C, de Lichtenberg U, Rinner O, Lee H, Pedrioli PG, Malmstrom J, Koehler K, Schrimpf S, Krijgsveld J, Kregenow F, Heck AJ, Hafen E, Schlapbach R, Aebersold R. A high-quality catalog of the Drosophila melanogaster proteome. Nat Biotechnol. 2007 May;25(5):576-83. Epub 2007 Apr 22.
Deutsch EW, Lam H & Aebersold R. PeptideAtlas: a resource for target selection for emerging targeted proteomics workflows, EMBO Reports (2008) 9, 5, 429–434
Lam H, Deutsch EW, Eddes JS, Eng JK, King N, Stein SE & Aebersold R. Development and validation of a spectral library searching method for peptide identification from MS/MS. PROTEOMICS (2007) 7(5):655-667.

## Sheet: CG6000
1019.3994730169754 2			S_E4.4407.4407.2.dta
147.12 30.69
157.886 2.36			CG6000 CG6000-PA, isoform A [Drosophila melanogaster]
159.049 3.41
162.331 4.35
169.189 2.28
175.111 5.46
179.853 10.94
183.047 84.52
185.397 3.32
191.924 5.61
193.909 10.59
198.111 12.92
199.144 5.47
201.149 19.23
205.289 8.04
207.345 1.59
210.182 8.12
211.168 44.55
213.064 2.82
213.935 11.51
218.361 2.49
226.272 3.76
228.139 209.2
232.026 2.14
233.163 12.25
243.831 15.57
245.382 15.21
245.996 4.98
250.177 5.4
253.221 11.19
254.192 9.32
259.032 4.59
260.254 8.71
261.177 19.14
270.091 4.72
271.189 2.58
272.156 66.68
283.949 5.09
286.023 2.45
291.285 17.72
292.225 4.71
294.305 92.46
296.874 2.22
299.953 4.4
308.143 3.36
309.467 8.87
310.093 13.35
316.076 2.76
321.391 7.15
323.312 2.03
325.061 51.69
327.555 7.94
331.864 6.95
338.121 9.84
339.111 16.86
340.48 9.07
343.148 133.4
344.1 6.57
347.118 9.29
351.197 275.7
351.927 7.56
359.225 13.46
361.437 2.85
362.35 16.66
363.574 4.57
369.379 12.15
371.135 3.6
372.22 2.01
373.001 7.58
379.128 16.71
383.986 2.15
386.233 19.58
388.345 23.33
394.206 17.65
396.681 552.5
398.174 4.8
399.037 5.26
402.573 4.7
404.425 16.94
408.879 51.58
409.748 2.7
411.779 7.42
414.225 236.2
415.664 2.37
417.335 1.7
418.125 7.88
419.552 13.73
420.278 7.19
422.254 4.59
424.177 16.99
425.274 68.32
430.052 60.86
431.196 16.37
433.63 3.95
435.872 24.28
437.869 12.22
439.223 127.3
440.11 3.48
443.221 22.19
444.717 4.85
446.217 18.87
447.11 7.08
452.227 15.47
453.073 17.61
454.033 7.12
457.558 10.31
461.961 25.01
462.969 2.82
464.292 146.3
465.291 8.69
466.015 5.04
467.185 32.7
468.604 42.34
471.995 28.13
473.905 6.72
474.786 25.33
477.565 11.46
478.988 54.59
479.846 16.42
482.387 13.34
483.134 3.61
485.256 155.5
486.228 6.71
487.236 33.09
488.086 26.94
490.14 8.91
491.223 2.84
492.215 75.58
493.163 22.77
493.798 24.88
496.358 34.78
498.056 34.47
498.852 4.14
501.095 346.2
501.866 64.81
503.712 28.53
526.614 12.63
528.37 26.71
530.942 4.33
533.291 3.88
534.077 11.66
535.31 193.2
535.969 26.82
538.105 17.54
555.627 40.23
556.323 89.27
564.446 23.16
567.269 5.98
573.348 10.01
578.227 36.71
578.851 3.12
582.578 3.1
584.522 8.06
585.905 27.16
589.665 9.88
590.642 7.64
592.462 8.14
600.378 5.64
601.445 2.78
606.42 386.6
636.337 5.21
641.369 22.36
642.383 9.03
644.119 10.73
646.458 3.69
647.423 13.46
658.106 1.0
658.999 14.69
660.993 10.93
662.24 17.89
664.643 4.07
669.239 314.3
670.016 3.96
672.505 3.48
677.349 212.8
678.745 18.01
680.266 3.03
681.398 7.85
682.228 14.2
691.266 21.88
697.573 12.07
700.368 5.95
701.298 9.86
705.656 2.11
707.381 20.17
709.169 26.22
711.609 3.9
712.294 3.42
713.302 2.54
718.459 2.62
726.083 171.0
728.238 20.54
729.567 1.6
732.013 4.33
743.008 8.27
746.907 18.74
748.392 270.5
749.117 9.49
754.391 5.71
757.66 3.92
758.913 1.25
761.139 10.34
765.199 6.82
767.613 4.31
774.298 10.65
777.245 14.59
784.153 8.31
787.636 3.35
788.658 9.86
792.341 1071.0
793.129 17.84
801.549 6.35
808.204 6.14
816.328 12.66
818.39 14.1
846.983 10.83
855.438 16.25
858.023 6.88
861.778 1.94
862.604 4.07
873.286 248.6
874.011 3.94
875.537 21.03
877.294 205.0
891.64 35.51
906.558 6.18
917.417 68.44
948.55 3.68

## Sheet: VhaM9.7-2
1357.2546730169754 2			S_F4.3684.3684.2.dta
199.352 9.18
213.064 7.17			VhaM9.7-2 CG7625-PA [Drosophila melanogaster]
226.277 10.16
232.062 6.21
246.084 52.21
247.258 17.81
249.4 33.95
258.327 7.46
262.167 28.08
263.037 10.01
265.223 32.81
266.117 7.27
277.204 28.28
278.09 12.32
280.166 9.64
284.079 11.98
284.991 14.27
287.009 19.35
290.24 34.52
303.109 7.85
312.062 15.21
327.285 7.43
329.259 15.76
330.169 10.36
334.255 79.96
335.396 7.27
347.913 16.91
349.217 22.53
352.344 15.31
357.188 12.56
360.407 7.58
375.081 10.6
378.379 12.19
390.823 13.84
393.337 257.3
394.489 23.05
396.226 85.56
397.369 15.83
398.813 10.93
405.299 42.34
406.141 6.8
413.254 8.98
415.225 7.88
423.419 6.23
440.401 191.5
441.455 25.24
442.557 11.03
443.732 10.06
445.348 5.7
450.868 8.66
453.094 23.8
454.298 24.71
458.521 6.13
459.474 15.84
460.083 10.16
462.297 58.86
475.666 31.18
477.574 23.24
480.613 9.31
483.137 8.66
484.299 122.4
485.221 18.21
491.386 7.55
494.184 7.23
496.244 6.23
497.275 8.6
499.325 9.5
504.076 10.18
504.968 9.48
506.309 276.1
507.367 100.8
510.232 33.04
520.826 9.21
527.51 23.88
528.478 53.13
531.071 79.83
532.035 34.3
533.174 15.08
534.205 12.77
538.286 13.93
540.176 89.8
540.994 32.17
545.24 15.05
546.038 31.18
547.28 61.27
549.357 31.33
550.266 27.32
554.6 182.1
555.582 8.46
556.384 32.05
557.449 13.37
558.408 14.03
563.323 12.62
567.074 19.98
570.207 9.09
571.117 12.93
572.714 56.8
573.429 87.2
574.199 90.79
575.247 14.59
577.117 36.06
578.506 96.53
579.12 479.4
580.128 7.41
581.453 12.92
582.809 27.07
583.67 15.49
585.812 7.92
589.753 8.51
591.072 143.9
592.021 52.7
595.411 85.74
597.214 6.44
598.254 5.92
604.198 9.6
605.426 24.35
606.354 10.89
607.255 19.48
608.333 23.2
612.128 21.1
613.342 23.08
614.715 38.34
615.55 49.83
616.435 33.15
618.86 32.69
619.929 23.92
620.81 8.24
622.43 280.4
623.447 21.5
625.209 6.54
625.925 28.37
626.964 17.69
627.764 19.61
628.731 6.63
629.504 11.62
630.358 8.21
631.372 22.87
632.235 30.85
632.934 13.81
634.246 11.1
635.374 17.69
638.2 101.0
638.851 14.79
639.528 5.63
643.927 10.49
646.762 320.2
647.445 154.5
648.963 19.22
650.138 15.22
651.224 20.73
653.283 375.7
654.368 123.8
655.58 11.09
656.573 113.6
657.31 37.23
658.08 60.01
659.315 60.66
660.545 219.7
661.494 207.8
662.454 21.71
663.208 20.26
669.652 854.5
670.481 552.3
672.621 15.38
686.075 16.06
687.223 44.01
690.286 11.27
699.226 14.22
701.986 7.23
702.607 12.69
704.296 120.2
705.688 9.84
709.261 15.03
711.369 8.93
730.786 11.05
736.606 6.53
741.199 11.41
748.085 18.36
749.689 11.21
753.317 6.36
754.839 22.14
756.534 6.97
757.608 29.96
760.189 13.15
761.165 7.68
766.354 450.1
767.398 170.2
770.887 18.87
777.503 19.19
778.43 33.2
779.349 21.44
780.523 8.13
787.478 16.81
788.835 28.25
791.03 11.31
795.746 6.46
796.608 6.07
798.372 5.71
802.506 10.35
805.021 17.84
807.396 39.74
815.023 8.33
816.534 6.75
817.431 15.63
819.27 7.03
823.909 8.65
833.188 24.14
834.125 41.54
835.048 10.63
836.2 16.15
838.572 6.8
840.406 10.96
841.903 30.19
844.035 12.11
846.141 10.41
851.411 78.81
852.345 32.25
857.313 9.29
859.154 10.43
860.605 10.96
862.211 22.56
863.13 7.39
872.416 19.39
877.504 16.57
878.461 15.73
879.746 23.23
880.594 20.62
881.906 24.96
886.542 13.76
889.314 10.22
890.462 18.09
892.332 9.05
893.175 15.19
895.621 69.94
896.494 32.12
898.019 19.93
899.422 6.93
901.515 7.43
902.95 34.77
904.506 11.25
911.324 10.23
923.243 15.82
936.655 34.22
945.581 11.75
946.84 85.95
948.23 11.84
950.469 29.49
951.373 39.31
952.086 5.99
964.255 96.78
965.265 30.49
966.364 6.71
975.868 37.72
980.435 18.44
985.979 9.1
988.152 7.44
991.381 6.13
996.212 8.78
998.274 13.13
1009.339 153.7
1010.413 83.94
1015.511 5.74
1023.255 9.74
1030.254 8.94
1042.852 10.4
1044.382 8.65
1048.047 22.55
1071.875 9.33
1078.366 35.19
1079.453 99.28
1081.799 12.14
1092.895 13.49
1094.119 78.02
1095.073 27.15
1096.423 12.58
1101.239 7.48
1102.463 6.86
1103.57 5.66
1106.821 19.4
1111.453 107.0
1112.484 32.22
1115.395 11.26
1118.453 26.49
1121.314 22.98
1124.596 10.4
1128.674 23.14
1136.492 17.13
1138.461 7.11
1150.341 6.71
1156.478 6.81
1158.271 8.52
1164.533 10.45
1181.632 30.27
1182.418 102.7
1183.169 54.72
1191.773 12.05
1200.476 5.74
1225.269 21.64
1254.76 57.76
1318.365 11.17

## Sheet: CG6016
2204.4355970169754 3			S_E9.2391.2391.3.dta
210.96 2.42
228.009 9.94			CG6016 CG6016-PA, isoform A [Drosophila melanogaster]
243.998 6.22
292.828 25.58
313.761 4.51
327.415 4.84
332.971 2.78
361.168 3.35
363.034 3.15
397.318 3.41
418.51 3.51
419.919 3.91
436.321 12.13
437.24 18.56
465.742 12.33
469.195 3.42
472.206 9.69
473.176 3.78
477.22 5.58
478.201 9.36
481.81 12.03
486.791 4.01
489.115 3.44
503.674 12.18
507.496 28.15
520.063 8.21
521.284 1.32
524.384 16.22
528.946 1.4
530.684 31.82
539.338 33.95
546.207 22.35
551.506 5.52
554.093 3.25
557.224 7.59
559.085 5.98
564.359 53.65
565.373 15.7
574.069 2.04
582.865 6.82
589.664 8.47
591.329 8.28
599.214 35.7
599.969 23.2
606.673 20.4
607.419 20.54
608.675 51.06
615.114 6.44
625.042 23.48
628.837 2.86
632.785 21.89
633.632 2.8
637.342 56.48
638.073 65.18
639.397 15.37
647.189 40.25
647.943 15.99
651.528 10.32
664.448 13.32
672.266 5.0
681.665 16.52
682.56 9.17
684.569 8.93
686.544 12.29
690.429 70.15
692.225 10.92
699.695 5.32
700.896 14.3
701.727 5.42
705.56 4.25
709.408 6.99
711.438 41.58
713.819 7.32
717.717 116.9
718.384 1.75
721.198 28.33
723.228 222.1
723.872 191.7
725.412 25.45
727.3 22.38
732.053 8.75
744.756 18.61
751.24 7.94
761.966 3.7
783.24 11.12
789.323 4.63
791.71 15.52
803.226 14.77
804.393 14.37
807.329 5.41
808.08 7.99
811.809 19.02
812.461 9.6
819.078 6.75
820.846 21.76
821.49 39.73
822.537 13.99
823.514 3.05
824.583 6.39
825.247 20.17
840.657 22.97
842.353 10.32
847.338 14.18
849.435 17.39
850.609 5.51
854.843 11.73
859.659 4.4
862.119 18.66
871.578 8.52
875.425 17.4
884.219 24.43
885.038 17.13
891.226 5.45
892.814 44.82
894.083 4.17
899.014 9.18
901.239 5.74
909.844 3.15
910.769 34.7
912.388 57.19
913.491 33.98
914.417 13.41
924.488 9.87
936.669 9.91
943.464 29.97
946.28 22.05
954.583 7.33
958.461 14.72
960.412 30.31
962.712 16.32
971.91 33.43
972.541 29.53
979.076 38.4
980.104 15.99
980.839 2.57
987.587 20.85
990.373 31.44
991.6 6.85
993.454 5.29
995.711 8.67
1005.721 23.89
1023.378 18.74
1029.788 37.72
1032.477 2.49
1040.312 35.82
1074.345 14.55
1077.556 20.75
1091.66 12.03
1127.932 14.3
1138.289 5.73
1164.874 4.67
1197.615 7.94
1214.354 20.51
1215.25 3.77
1218.185 14.0
1239.461 9.19
1247.141 6.99
1320.214 7.65
1386.09 3.41

## Sheet: CG30344
1392.9746730169754 2			S_F910.3382.3382.2.dta
203.767 15.66
225.241 44.49			CG30344 CG30344-PA [Drosophila melanogaster]
227.061 14.93
237.377 17.16
252.129 14.63
261.28 12.89
268.304 18.38
269.241 17.15
276.513 26.12
278.207 14.56
279.163 17.62
284.238 16.22
288.969 12.12
290.315 18.36
293.58 17.06
294.299 12.47
298.183 17.96
303.266 165.5
318.414 12.2
323.31 14.94
324.283 19.0
332.089 13.71
338.428 16.89
343.373 16.86
351.203 12.13
352.224 15.73
356.01 15.97
367.427 15.92
374.59 56.31
379.425 12.39
381.333 25.7
385.269 21.23
389.34 19.92
390.186 16.12
391.23 20.31
395.087 62.97
397.165 12.31
399.185 89.01
401.371 14.98
405.201 25.31
409.327 15.39
410.288 71.3
418.917 12.04
420.251 14.61
427.293 21.3
428.358 20.87
429.115 13.27
432.327 57.97
434.331 13.68
435.446 15.83
437.145 28.17
440.255 18.64
442.288 15.54
443.461 13.67
447.295 12.92
448.304 33.69
450.471 14.52
456.958 23.08
458.155 13.0
459.516 21.85
460.486 14.17
461.37 39.05
462.406 36.99
466.027 13.64
469.398 16.07
470.205 38.63
476.351 111.1
477.234 14.97
479.484 20.46
480.392 31.3
489.491 19.58
490.412 34.67
492.273 66.41
494.343 88.45
495.447 25.01
498.277 30.83
502.509 19.73
504.184 183.5
504.817 269.5
505.438 29.39
506.4 20.35
508.349 68.01
509.501 15.9
510.563 17.93
519.164 18.86
522.307 305.4
524.968 15.99
530.947 37.59
531.827 19.52
532.523 17.11
533.411 39.9
535.573 13.8
536.946 32.69
538.006 12.11
539.289 44.08
545.871 52.89
546.545 16.82
548.458 522.9
550.966 15.07
551.694 13.34
554.478 14.41
555.354 12.03
557.978 20.69
559.461 36.0
560.292 32.3
561.277 39.88
563.719 18.46
565.516 33.06
566.872 29.29
569.427 18.07
570.191 12.81
573.164 24.92
575.287 43.69
576.118 16.04
576.908 27.19
579.337 129.4
580.331 22.97
583.711 29.53
585.456 23.65
586.731 60.74
587.361 37.11
588.602 29.05
590.429 28.62
593.335 214.0
594.48 15.43
596.471 48.7
597.486 44.96
599.413 34.77
600.286 42.45
601.891 38.98
603.256 90.95
604.807 804.3
605.503 129.9
607.945 19.35
610.028 44.94
613.078 36.34
615.583 12.75
620.171 14.38
621.3 1436.0
622.458 117.1
623.647 15.2
625.543 16.96
626.487 37.09
628.616 29.22
630.16 23.04
631.32 18.65
632.243 24.64
633.281 25.73
634.031 26.79
636.162 20.6
639.161 37.77
642.829 41.63
644.788 48.38
646.338 16.27
647.401 20.78
648.434 16.42
650.375 12.32
652.509 18.88
654.002 48.17
656.377 105.6
657.857 13.46
658.84 56.6
660.215 31.69
661.244 89.7
661.877 38.24
663.128 30.27
664.508 199.8
665.746 103.8
666.99 341.5
668.082 20.48
673.007 65.31
674.297 240.6
675.105 82.51
675.867 92.96
678.228 55.07
678.974 268.5
679.942 61.4
681.205 15.93
683.55 84.04
684.488 79.6
685.295 63.89
687.351 360.6
688.037 1188.0
689.007 33.56
692.514 22.41
701.475 79.63
708.491 56.63
712.359 17.84
724.262 29.73
727.879 17.03
742.498 23.97
750.724 13.64
754.375 58.73
755.115 12.37
756.344 19.86
758.349 34.21
759.5 33.86
762.266 37.74
765.231 15.22
772.397 1884.0
773.559 232.8
774.816 15.22
776.378 28.91
777.315 17.17
780.67 27.81
785.63 19.95
787.457 22.44
789.709 56.81
794.516 51.21
801.243 17.05
802.179 26.28
803.151 16.6
804.924 14.62
819.781 20.64
822.331 12.62
832.332 27.88
837.702 29.65
842.045 38.21
843.035 24.64
853.386 20.41
857.505 15.47
858.375 18.51
860.45 80.49
867.495 35.71
871.492 813.5
872.367 222.8
874.613 14.11
875.635 27.13
890.172 15.88
899.499 16.03
902.636 26.35
913.246 13.24
915.497 19.88
919.065 30.79
921.434 25.03
922.686 13.45
923.546 70.81
927.658 20.35
929.687 13.11
930.782 62.65
931.589 49.69
932.454 28.42
942.149 17.58
943.331 31.28
944.259 17.94
954.193 24.94
958.44 16.53
961.477 25.12
966.913 14.61
979.423 20.65
980.284 12.95
996.304 33.73
999.609 51.52
1000.623 26.82
1002.375 12.99
1005.29 27.1
1008.44 314.3
1009.637 45.86
1031.694 14.0
1033.7 12.78
1042.618 20.08
1047.239 49.61
1060.57 51.66
1072.363 78.54
1077.245 27.06
1089.644 22.39
1090.592 274.7
1091.35 13.87
1095.516 186.1
1096.232 15.88
1096.841 29.56
1099.68 18.78
1107.689 15.49
1108.491 52.75
1116.455 15.91
1118.613 17.4
1121.518 35.3
1129.47 15.45
1141.357 24.02
1148.455 12.17
1159.539 25.54
1160.473 42.55
1171.274 16.84
1176.504 24.5
1177.281 15.36
1188.931 30.76
1189.617 220.9
1190.519 74.65
1208.396 85.1
1216.375 17.34
1217.608 33.67
1218.415 46.45
1219.497 34.46
1246.347 75.54
1246.965 59.11
1247.769 30.66
1248.514 12.23
1263.514 14.11
1264.489 48.94
1319.211 31.93

## Sheet: CG5630
1474.4946730169754 2			S_E3.5755.5755.2.dta
213.147 21.31
217.479 10.55			CG5630 CG5630-PB, isoform B [Drosophila melanogaster]
221.037 12.67
235.111 3.4
239.294 15.65
240.122 7.71
242.294 13.86
243.248 7.6
244.392 6.56
246.378 6.23
247.166 4.15
248.367 12.42
256.763 5.19
258.232 5.12
260.197 62.6
261.149 15.3
266.166 7.68
268.18 5.75
278.357 4.7
283.106 7.51
284.155 4.38
287.212 10.07
292.35 20.83
305.426 25.11
306.168 29.23
309.288 11.12
310.313 5.23
315.375 9.8
323.249 6.62
325.861 16.34
327.11 12.86
328.183 2.66
329.285 3.76
330.663 8.79
331.317 22.49
332.234 28.25
341.135 78.34
346.165 25.78
347.298 16.75
348.636 12.03
349.276 27.24
350.446 14.8
353.118 9.79
355.886 1.9
358.539 12.59
359.41 10.44
367.144 29.03
371.06 14.61
374.181 5.47
376.313 31.8
389.145 1.75
391.299 5.07
392.961 27.94
394.209 19.59
395.164 8.79
397.696 2.44
402.074 4.28
410.303 3.99
411.755 2.96
412.417 10.96
413.421 6.08
414.646 4.5
417.98 21.71
424.3 9.1
426.071 15.15
437.191 28.34
438.241 27.5
439.179 6.56
443.467 7.38
446.524 8.14
447.183 15.25
449.336 34.88
450.676 5.6
452.139 23.93
455.176 44.83
458.648 3.02
459.415 19.86
461.167 4.48
464.416 12.96
465.054 5.54
466.254 9.73
476.131 17.31
477.043 16.26
478.474 4.91
480.977 6.35
481.669 17.4
482.295 12.27
483.317 3.17
485.073 8.79
486.282 832.0
487.33 91.76
488.449 9.62
490.506 8.3
494.471 6.17
499.489 4.07
500.407 5.02
504.119 102.5
505.208 10.68
506.39 7.7
507.382 13.53
508.165 22.11
511.257 3.57
525.244 31.13
526.264 25.16
528.375 6.24
536.316 6.22
537.058 11.5
539.197 33.59
539.934 2.95
541.583 6.16
543.775 14.38
546.263 6.32
551.804 7.99
554.313 15.84
555.275 2.02
556.27 8.79
557.519 17.27
569.406 22.64
570.245 36.62
571.371 4.89
571.972 2.34
573.615 5.22
577.125 8.11
578.104 2.37
580.15 1.54
587.421 254.8
588.504 68.73
589.32 25.74
591.49 13.4
600.384 13.42
601.202 16.19
610.112 4.66
612.166 3.38
613.185 14.42
613.867 87.99
616.038 7.02
622.291 94.32
622.897 76.97
623.6 8.06
625.382 3.09
626.703 8.65
631.468 707.9
632.5 70.41
633.399 3.51
635.679 12.5
636.335 14.06
637.342 11.35
639.389 61.72
644.343 387.2
645.17 35.05
648.103 13.83
649.552 26.54
650.387 13.29
651.428 35.01
653.226 8.65
657.237 27.06
658.228 21.64
659.558 7.65
660.458 14.41
663.537 9.54
664.756 17.7
667.229 306.8
668.401 37.5
673.022 8.45
674.964 1.8
676.202 136.4
677.438 8.22
685.076 47.07
686.611 11.55
687.888 46.91
693.44 156.4
694.449 49.55
698.651 2.65
700.497 6.37
702.143 133.3
703.261 10.51
704.613 24.55
707.224 9.27
709.102 28.75
711.23 3.58
714.517 12.35
715.408 31.57
720.264 5907.0
721.426 1.77
723.62 15.79
725.963 6.9
728.49 1036.0
729.529 12.93
730.582 6.6
733.177 5.14
736.892 6.71
742.169 6.3
747.265 3.21
748.283 2.98
755.571 3.03
757.012 6.71
757.844 2.14
759.019 25.18
760.562 15.92
773.719 12.74
787.298 16.96
790.96 2.02
802.856 6.7
803.508 4.04
804.999 28.1
807.407 458.4
808.579 142.8
813.195 12.27
814.079 12.5
827.562 3.89
830.268 296.2
831.26 96.12
841.762 20.74
849.395 13.84
859.134 7.39
860.376 7.06
861.509 5.82
870.205 13.69
870.839 1.46
877.165 3.38
879.532 14.65
887.319 289.5
888.301 90.1
889.036 11.03
895.076 14.87
897.698 4.86
903.862 2.27
909.894 2.11
917.379 13.18
918.492 1.92
926.247 15.01
929.624 7.58
944.809 35.44
950.202 6.16
952.507 23.87
953.282 24.28
960.154 17.0
960.958 14.27
968.939 8.51
970.323 374.6
971.225 191.2
972.113 19.16
973.633 8.36
974.663 16.66
984.669 5.35
985.436 4.25
986.412 7.05
988.22 733.6
989.266 262.6
996.591 10.86
997.961 11.72
1002.39 4.55
1008.718 18.78
1015.591 13.14
1022.865 4.1
1024.443 8.01
1025.719 14.0
1036.504 6.13
1055.671 2.56
1056.698 5.25
1073.493 25.07
1079.338 5.23
1080.376 15.81
1085.498 16.73
1087.407 7.84
1094.183 12.23
1104.483 5.7
1115.366 21.93
1116.447 27.6
1126.672 28.86
1128.333 8.32
1133.459 251.7
1134.537 171.8
1143.33 8.58
1196.267 16.84
1198.995 19.72
1214.334 99.09
1215.431 11.98
1225.412 6.56
1244.385 25.96
1259.626 5.84
1261.445 114.7
1262.553 35.6
1282.44 5.02
1298.67 15.44
1300.5 11.36
1309.199 24.58
1309.995 12.56
1311.574 10.64
1327.229 279.5
1328.309 84.19

## Sheet: Vha100-2
1566.5024730169755 2			S_F912.7451.7451.2.dta
227.431 11.07
229.367 6.38			Vha100-2 CG18617-PB, isoform B [Drosophila melanogaster]
240.035 11.09
241.213 11.1
246.209 13.33
252.305 10.88
255.346 10.87
258.174 30.93
270.07 13.57
270.861 19.67
272.168 320.1
277.179 12.39
281.241 24.51
283.157 18.66
286.145 339.6
287.995 7.53
294.361 7.35
297.308 25.29
298.369 14.51
302.128 16.09
313.468 9.53
315.126 42.92
322.186 9.82
326.313 23.79
328.221 40.4
338.777 21.76
346.235 18.97
351.343 8.92
354.139 62.53
355.242 11.56
357.166 21.27
367.208 15.47
369.947 10.43
371.388 19.68
373.239 48.09
374.35 12.5
379.347 13.84
381.037 29.62
383.167 14.25
384.162 14.15
385.22 694.8
386.362 37.19
387.012 15.95
387.681 11.02
390.269 9.34
395.231 48.59
399.107 49.29
402.276 12.52
406.478 7.48
408.619 15.23
409.464 9.47
415.743 8.34
423.076 7.73
425.134 32.35
427.249 11.31
435.147 11.55
437.298 10.41
442.19 11.29
450.513 32.44
451.433 26.23
452.676 48.95
453.393 96.3
456.229 13.88
462.154 17.87
467.117 22.23
468.205 21.4
470.233 406.2
471.225 20.15
480.22 116.0
484.329 16.85
485.07 17.72
486.236 7.34
492.16 21.91
496.193 40.1
498.14 1235.0
499.313 62.73
500.32 61.83
501.328 20.29
502.408 35.74
503.316 7.1
505.633 6.44
506.96 13.7
509.348 10.72
510.325 16.84
514.263 8.34
520.441 24.82
522.615 7.91
524.369 7.41
525.437 14.71
530.449 6.9
534.798 144.2
535.606 6.72
537.532 8.44
538.29 58.69
540.516 11.67
545.744 8.41
546.967 14.55
553.428 13.19
555.922 27.63
558.382 15.79
562.597 10.01
563.301 13.89
565.278 6.62
567.422 24.65
569.14 10.43
571.492 9.26
573.938 11.4
581.466 38.37
583.205 14.79
588.701 15.76
589.566 16.54
591.315 624.8
592.193 28.55
593.057 9.16
594.472 21.17
595.485 24.27
598.362 8.51
602.297 183.6
603.409 19.33
605.458 10.29
608.382 25.82
610.373 6.38
612.633 9.05
615.286 73.55
616.334 33.71
620.921 16.86
621.604 13.91
623.211 11.37
624.248 11.85
627.571 27.65
628.373 28.83
629.496 17.21
631.443 22.03
632.325 20.22
633.258 6.61
638.543 11.55
639.641 11.62
640.74 648.8
641.505 83.54
644.85 26.86
647.311 7.94
652.897 8.25
655.099 24.37
658.291 12.2
662.198 28.25
666.441 12.71
668.19 6.6
669.846 27.64
672.523 11.17
683.881 23.43
690.302 22.47
697.417 65.79
698.443 10.31
699.323 17.42
708.784 7.94
710.151 50.79
711.46 16.37
714.147 28.96
714.972 26.32
716.215 14.22
719.48 6.58
721.623 10.9
722.356 27.13
723.569 27.18
724.224 8.68
725.522 25.65
729.335 8.31
730.981 8.17
732.223 20.36
733.957 16.36
734.809 13.62
739.447 28.29
743.388 285.8
744.366 28.66
745.253 7.37
746.375 36.25
747.194 12.1
748.286 33.03
749.498 43.13
752.302 63.4
754.795 14.3
757.206 26.2
759.135 15.33
761.626 26.9
762.805 27.39
765.111 126.2
766.036 86.13
772.271 24.91
774.238 318.7
775.117 96.06
776.651 7.86
794.945 16.05
801.362 30.92
805.22 24.69
808.017 15.78
819.122 26.01
821.352 18.07
823.296 216.6
826.451 13.78
831.698 13.44
832.357 7.38
856.417 65.75
861.349 32.43
862.228 12.64
867.331 7.93
869.033 12.03
882.704 27.76
899.265 15.39
900.855 11.62
901.552 11.01
902.277 7.54
915.474 11.62
918.627 22.76
919.568 15.93
920.542 12.18
933.261 39.47
933.908 10.37
951.315 68.41
954.324 9.87
957.557 13.17
958.268 13.13
960.637 11.11
961.317 30.8
961.946 15.45
966.485 16.09
969.486 17.63
971.492 117.0
972.608 11.28
974.67 25.93
978.877 17.72
989.06 19.18
989.782 10.95
990.999 32.39
991.682 52.77
1000.929 12.7
1009.361 24.81
1017.384 12.0
1018.177 14.64
1028.127 18.43
1033.707 19.47
1045.504 8.87
1050.433 24.24
1051.65 9.77
1052.449 19.64
1055.601 12.06
1061.469 10.18
1062.463 46.77
1063.569 31.15
1064.707 171.4
1065.835 90.84
1066.627 15.36
1068.492 5330.0
1069.592 551.3
1089.996 18.12
1095.138 13.71
1101.81 18.34
1105.166 22.3
1116.561 7.49
1128.459 6.43
1145.191 6.55
1155.614 9.54
1156.283 11.56
1159.306 6.97
1160.968 20.98
1163.504 50.77
1164.469 20.43
1174.376 14.9
1178.665 12.36
1179.458 11.83
1181.518 2027.0
1182.716 226.4
1202.763 12.49
1204.655 18.23
1208.648 12.13
1215.731 13.0
1247.587 9.62
1251.599 7.99
1268.565 18.73
1270.75 6.75
1271.411 12.89
1276.501 123.6
1277.535 49.2
1280.594 337.9
1281.585 20.34
1287.19 19.74
1289.927 20.39
1291.486 10.42
1294.361 1033.0
1295.424 112.2
1305.086 6.53
1306.14 30.72
1337.569 9.31
1391.127 21.05
1399.745 13.24
1400.896 22.71
1402.212 18.01
1411.144 7.27
1418.292 11.87
1419.516 55.47
1527.665 9.06

## Sheet: CG1307
1440.4596730169753 2			S_E6.5488.5488.2.dta
209.337 5.96
211.265 3.06			CG1307 CG1307-PB [Drosophila melanogaster]
227.297 11.13
228.194 8.68
233.061 6.09
239.146 8.28
240.019 11.94
242.595 3.26
253.445 7.1
254.286 5.44
260.863 11.51
265.45 10.32
269.191 5.44
270.123 4.38
272.183 32.18
272.998 25.66
283.73 15.96
286.229 9.6
290.41 43.76
293.88 3.82
296.142 7.89
301.071 6.83
310.444 12.8
311.803 5.76
314.046 72.65
319.228 7.32
322.184 7.8
328.188 5.88
338.434 9.3
339.096 13.27
340.349 12.58
341.382 7.96
343.32 7.8
348.296 3.7
348.963 8.83
353.161 36.01
357.151 21.57
367.13 248.4
368.189 26.06
371.067 65.68
372.246 5.01
383.295 3.93
385.12 202.7
385.933 6.81
390.465 7.65
395.269 5.47
399.603 17.15
403.343 48.07
410.332 16.91
411.071 19.41
412.855 11.55
414.011 8.3
421.294 23.64
422.905 8.35
424.18 47.44
428.212 9.15
432.962 3.82
437.969 23.42
439.262 57.26
440.442 31.45
441.387 15.48
442.216 91.63
443.169 3.48
447.368 4.69
450.424 5.36
452.077 16.98
453.354 5.65
456.283 172.3
458.381 5.56
466.131 599.1
467.363 39.42
468.226 29.07
469.194 18.03
470.454 9.12
474.262 16.9
478.557 14.27
479.557 7.43
484.124 657.3
485.149 123.1
486.393 18.6
489.203 6.49
492.004 3.45
493.555 8.74
495.702 15.8
496.571 28.94
497.177 27.41
513.234 62.15
514.381 5.85
516.916 6.71
518.414 169.6
523.298 527.4
524.315 86.8
528.363 17.04
532.253 6.62
536.023 9.56
541.175 585.6
542.324 26.59
545.25 3.04
546.285 4.54
547.546 3.68
548.239 3.23
549.276 13.19
551.507 10.02
554.048 13.23
555.332 18.84
556.232 4.7
558.069 11.39
559.259 24.54
561.291 16.93
562.74 19.17
563.721 68.86
564.414 47.77
566.279 36.44
567.011 3.48
567.655 6.15
572.232 4.22
574.048 17.89
575.014 21.17
577.182 10.18
580.685 4.1
585.222 5.64
589.305 199.2
590.214 11.9
591.52 5.54
592.26 4.59
596.345 9.73
597.256 7.47
599.478 9.14
602.356 7.16
607.448 2.94
611.953 6.72
612.809 8.36
614.053 36.18
615.511 17.87
617.149 3.58
618.107 3.89
620.349 920.0
620.953 82.02
621.743 13.62
622.374 31.24
624.081 4.27
626.791 14.13
630.552 101.8
631.698 8.55
632.8 7.59
636.127 9.28
639.513 9.18
640.856 43.9
641.724 18.26
643.167 9.29
643.795 18.15
645.363 18.43
647.354 6.54
648.526 9.94
649.576 17.77
654.657 25.28
656.299 18.91
658.389 14.22
660.385 464.3
661.549 54.35
663.676 84.98
667.211 14.88
669.228 9.31
670.365 32.41
672.547 16.88
674.455 21.47
675.451 27.75
676.924 12.17
679.617 4.93
681.406 8.71
682.378 24.27
683.531 26.12
684.525 67.34
687.154 6.98
689.301 103.8
690.423 16.66
691.122 59.31
691.75 4.92
693.308 5.49
695.391 3.7
696.219 12.46
697.754 94.82
698.632 37.63
702.568 225.4
703.267 37.54
705.352 63.74
706.029 28.02
707.026 5.35
709.287 111.1
710.675 88.09
711.585 405.9
712.552 51.68
714.375 36.92
738.667 6.32
743.461 19.43
744.602 5.63
749.024 8.27
751.608 8.67
752.317 15.69
753.361 5.67
762.012 60.89
762.94 42.53
769.45 10.7
777.143 20.32
780.335 302.1
781.286 51.41
785.218 3.4
790.694 14.06
792.399 7.28
794.544 12.23
802.446 16.23
805.167 16.45
806.162 12.86
810.208 79.18
814.59 4.78
823.279 17.67
827.054 13.18
833.342 37.47
838.428 6.63
843.418 6.08
845.628 2.97
849.488 11.3
851.312 191.8
852.279 32.9
854.903 15.36
855.832 9.67
860.506 32.8
862.661 6.51
865.39 17.06
868.321 7.84
873.526 11.23
874.508 26.84
877.208 13.66
881.038 10.56
887.283 6.57
892.299 7.5
894.443 6.83
896.188 7.07
899.484 1770.0
900.586 129.7
904.366 73.9
906.374 8.18
922.387 118.0
923.257 24.9
929.47 8.79
931.217 5.97
933.529 5.18
934.77 13.43
938.174 19.44
938.886 5.38
942.4 18.02
944.502 35.31
949.535 12.81
954.192 11.01
956.455 2908.0
957.503 334.2
963.15 7.97
966.33 6.1
969.318 8.57
983.173 24.86
990.535 7.89
992.815 6.19
993.581 6.75
994.237 28.41
1004.803 3.43
1029.448 11.93
1030.665 3.8
1036.884 21.07
1037.487 57.18
1044.08 9.61
1045.729 3.95
1049.166 8.03
1055.424 606.6
1056.615 130.4
1061.51 11.84
1102.248 3.78
1106.558 22.28
1110.246 3.34
1115.294 7.88
1123.103 19.31
1126.425 350.8
1127.49 37.01
1128.126 3.01
1132.67 18.42
1149.321 22.54
1150.243 84.1
1151.904 24.22
1160.088 16.28
1175.826 2.92
1192.047 3.44
1196.56 6.96
1198.153 13.25
1219.185 7.36
1226.306 6.96
1239.575 72.35
1265.335 58.64
1266.393 13.74
1293.32 11.48
1353.113 15.38
1401.815 9.4

## Sheet: jagunal
1686.5046730169754 2			S_F6.5216.5216.2.dta
245.07 32.22
263.149 19.92			jagunal CG10978-PA, isoform A [Drosophila melanogaster]
267.242 14.28
283.214 10.15
284.933 6.8
299.29 7.6
303.189 16.75
318.194 16.49
322.212 187.3
323.357 43.2
336.914 6.71
338.409 10.74
351.206 9.43
354.085 10.05
359.146 14.39
366.159 64.56
367.004 10.77
373.206 22.0
383.261 9.35
385.294 13.2
387.406 6.77
394.165 323.4
395.019 64.18
401.335 10.7
413.463 16.86
416.453 6.75
419.345 17.74
421.494 6.84
423.171 10.91
426.264 10.13
430.192 56.99
431.496 9.53
433.452 23.71
436.315 18.36
437.32 9.26
440.25 11.86
447.318 31.16
451.329 115.7
452.644 7.73
456.379 18.27
457.21 13.18
458.229 306.5
459.319 45.58
463.024 8.47
465.195 148.1
466.271 45.92
477.205 12.66
482.75 51.49
483.608 50.97
484.3 51.03
494.307 12.42
495.307 7.72
501.337 146.6
502.241 16.09
504.405 13.81
505.635 30.36
511.331 68.73
513.394 14.74
522.337 43.39
529.155 635.2
530.211 96.66
533.445 8.73
538.287 13.15
544.39 7.61
555.195 7.62
558.118 15.2
558.839 9.3
568.154 73.37
574.245 21.72
576.146 15.03
580.236 14.86
582.813 18.47
586.257 172.2
587.201 19.99
588.357 9.03
589.305 12.16
598.273 235.5
599.304 19.33
604.911 8.14
605.556 12.84
619.89 19.08
625.247 19.41
628.728 43.55
632.8 12.92
644.47 11.32
651.397 105.2
653.384 12.7
665.09 12.55
666.294 8.29
667.282 19.19
669.206 307.8
670.384 63.36
680.297 24.17
683.419 10.56
687.385 19.26
688.349 25.4
690.206 29.2
697.296 17.2
698.035 25.08
698.855 14.72
709.307 17.17
710.617 16.49
713.274 228.3
714.281 39.61
715.355 14.62
720.369 15.96
721.689 53.9
722.657 12.91
724.224 25.17
728.104 24.08
730.231 26.22
738.315 17.29
742.152 14.07
746.364 11.61
747.43 11.1
751.599 16.38
754.378 46.6
755.37 13.95
759.536 7.68
760.572 34.44
761.457 22.05
763.552 10.83
764.464 20.17
766.485 44.84
767.439 16.3
768.324 21.77
769.465 51.21
770.796 31.98
771.48 10.89
777.314 50.27
778.109 43.41
780.177 11.37
781.243 24.7
784.35 143.8
785.226 65.7
786.542 715.1
787.532 73.47
788.318 10.6
790.245 8.06
790.943 23.93
793.354 8.59
793.955 33.46
794.562 9.94
797.774 16.52
798.661 12.77
799.559 10.34
802.208 285.4
803.004 208.7
803.697 69.63
804.54 7.39
805.504 16.06
806.982 25.36
809.071 12.22
810.289 32.12
811.25 229.0
811.861 174.0
812.62 52.42
813.237 9.07
813.847 23.08
816.695 50.8
817.601 35.31
820.631 15.39
821.241 29.69
822.024 12.36
825.275 495.5
826.103 594.2
827.459 135.6
828.666 22.11
830.017 11.3
831.622 29.13
832.376 10.62
834.324 1159.0
834.974 843.6
836.105 43.22
837.284 21.81
859.457 28.71
877.318 18.87
884.434 458.5
885.564 119.9
914.432 11.98
918.605 7.11
921.112 24.17
923.777 8.61
928.274 44.36
933.493 13.44
937.312 8.07
938.062 14.64
945.222 8.72
953.626 12.83
955.031 40.01
955.796 7.75
956.475 13.77
957.308 29.8
973.408 73.67
982.564 23.05
983.241 22.59
993.568 22.42
995.709 10.01
999.403 460.9
1000.326 238.3
1018.719 6.94
1035.485 9.96
1048.746 17.49
1051.47 8.22
1052.334 10.12
1053.293 23.87
1070.033 13.71
1070.745 35.08
1071.368 24.74
1073.254 10.93
1074.432 12.74
1081.217 14.08
1083.008 31.89
1084.491 7.33
1085.735 8.88
1088.285 139.3
1089.166 71.97
1089.779 12.16
1090.683 7.91
1095.646 16.04
1098.602 8.52
1099.975 39.11
1100.589 284.2
1101.608 82.43
1102.491 20.07
1103.914 6.76
1104.727 9.23
1108.541 11.98
1137.335 12.58
1139.352 116.2
1140.461 122.7
1141.507 9.76
1142.95 14.7
1144.191 18.0
1153.477 9.08
1154.553 9.41
1157.379 1167.0
1158.39 634.0
1159.389 45.15
1160.523 7.42
1167.954 11.34
1171.205 12.23
1172.548 46.68
1181.834 6.9
1186.661 11.38
1193.663 9.89
1197.816 10.71
1199.001 22.39
1200.588 30.96
1202.543 158.2
1203.562 46.29
1204.46 6.78
1205.34 27.16
1209.838 46.01
1210.542 65.56
1211.587 69.35
1212.79 24.42
1217.325 8.72
1218.254 78.46
1228.452 884.2
1229.512 594.3
1230.485 17.26
1234.467 12.69
1235.459 79.63
1236.586 13.06
1243.662 12.52
1244.897 15.04
1267.5 35.51
1276.393 13.27
1278.584 8.67
1281.677 26.53
1286.425 27.92
1293.411 8.29
1301.253 9.51
1313.364 22.23
1327.693 169.5
1328.614 121.7
1329.369 28.13
1334.382 9.57
1336.856 23.37
1338.664 12.15
1346.302 90.08
1347.221 95.27
1348.308 17.95
1352.602 7.92
1364.314 98.62
1365.28 79.53
1396.45 13.99
1416.683 23.42
1422.352 11.32
1423.083 10.81
1439.188 7.2
1459.942 8.73
1475.744 31.36
1493.59 74.48
1494.623 54.46
1495.765 9.74
1511.325 61.77
1512.274 116.2
1539.556 9.99

## Sheet: CG10166
1579.4964730169754 2			S_E6.3749.3749.2.dta
225.215 9.63
240.162 23.53			CG10166 CG10166-PA [Drosophila melanogaster]
240.898 13.59
242.149 70.75
250.186 14.92
254.233 21.75
258.058 47.99
260.297 8.95
261.293 12.88
276.269 53.89
284.832 15.76
289.982 8.39
303.184 11.14
307.706 16.86
313.093 7.17
315.369 24.62
316.497 8.6
333.149 240.2
335.228 11.49
345.248 12.58
352.064 10.69
353.491 13.37
354.227 11.23
358.158 12.32
367.118 17.47
368.151 12.88
368.938 10.08
370.328 55.16
371.481 8.2
385.131 18.76
386.257 14.58
388.219 7.84
388.855 7.14
390.525 24.19
396.27 14.8
398.373 9.5
402.233 54.83
403.162 39.0
403.958 11.07
407.087 8.43
412.052 9.74
414.174 8.36
418.232 20.98
419.145 10.67
420.286 1110.0
421.125 19.91
429.162 12.35
449.582 12.1
462.042 30.33
464.429 27.58
466.873 12.75
471.339 12.28
480.311 80.6
481.264 48.22
482.221 32.93
489.522 15.37
499.346 140.5
501.65 7.3
511.491 7.29
517.527 12.64
519.358 821.0
525.24 28.63
530.197 12.53
534.883 9.1
538.74 11.2
539.626 37.12
543.862 17.82
546.174 14.63
547.311 8.2
556.266 46.74
557.54 7.7
559.588 13.09
565.958 8.41
574.656 20.49
575.307 44.59
576.209 13.11
578.44 12.71
579.254 17.9
580.269 13.93
592.421 14.45
601.204 14.45
604.471 9.89
605.08 9.46
605.952 20.17
608.359 14.05
609.277 11.87
616.623 24.45
619.445 8.24
626.58 7.93
632.485 289.9
633.995 9.52
635.796 20.65
636.402 24.2
640.328 10.94
645.474 9.64
652.519 66.55
653.338 128.7
655.541 6.99
660.866 510.5
661.687 26.47
666.304 22.78
667.462 23.45
668.77 26.53
669.815 947.5
670.589 131.3
671.358 54.7
673.061 28.93
674.794 25.58
681.24 11.86
690.162 129.9
691.364 35.07
699.26 51.41
700.441 16.18
703.13 21.84
705.331 8.34
706.015 23.3
707.564 33.26
708.477 20.53
711.334 12.72
713.09 16.95
715.578 21.52
716.243 20.61
720.033 36.14
723.241 19.3
724.948 55.93
726.244 12.99
728.043 32.6
729.384 35.5
732.201 14.48
733.775 87.47
737.456 19.24
738.217 17.28
739.011 27.66
740.414 18.44
741.439 32.24
743.351 19.68
745.836 20.25
747.395 468.9
750.653 22.31
752.762 22.67
754.87 31.15
755.585 14.05
758.263 38.92
759.3 37.06
760.194 10.38
762.76 29.88
763.88 73.97
764.641 20.31
766.438 11.5
767.374 21.16
768.484 17.75
769.264 24.02
770.782 35.33
772.18 236.6
772.901 744.9
773.657 17.91
774.856 36.71
776.434 23.21
777.125 13.73
778.934 14.08
780.501 239.8
781.531 913.3
782.371 52.78
783.34 8.84
787.021 7.22
799.178 44.31
800.994 13.85
803.052 153.4
803.875 9.13
808.496 18.69
809.516 7.86
810.23 9.55
815.084 39.13
816.188 109.0
818.158 28.09
820.535 15.07
832.417 12.42
833.347 110.5
841.423 8.05
846.571 19.11
850.815 7.6
859.382 7.95
872.5 11.38
873.514 12.45
874.359 11.4
879.317 19.28
902.029 53.09
902.778 16.97
910.528 407.4
913.504 42.8
917.089 24.38
919.397 45.89
921.097 11.04
925.33 9.56
928.033 9.46
930.207 14.51
931.229 55.09
932.314 7.89
934.588 9.21
941.88 9.79
945.511 7.62
947.251 7.14
948.303 136.0
949.421 10.51
953.502 10.83
961.469 7.83
964.547 13.29
984.299 16.38
989.521 16.05
990.443 18.1
991.45 7.94
993.822 8.04
1004.433 7.67
1006.599 10.27
1007.784 10.21
1013.016 37.04
1017.373 11.63
1019.364 9.41
1021.138 16.56
1024.435 264.0
1025.037 13.4
1026.363 61.34
1027.418 53.62
1029.366 56.35
1030.222 31.58
1031.699 8.9
1032.334 25.43
1033.457 10.8
1043.375 44.05
1044.354 194.4
1045.386 12.97
1046.324 17.97
1047.392 22.93
1048.455 8.73
1049.575 13.97
1061.415 263.6
1063.189 30.58
1064.29 48.72
1079.973 8.56
1081.458 831.0
1084.888 11.94
1092.764 13.3
1106.358 9.17
1114.414 16.9
1115.445 11.21
1116.113 10.37
1125.214 68.16
1126.801 8.09
1132.526 39.5
1137.393 17.39
1142.722 192.2
1143.542 207.2
1146.701 19.75
1147.348 8.06
1160.505 671.7
1162.169 10.11
1165.866 15.62
1175.67 13.47
1179.771 13.84
1181.668 16.28
1189.833 20.34
1192.688 62.11
1193.938 26.39
1206.442 9.11
1210.489 671.7
1211.579 15.97
1213.531 9.37
1229.472 82.17
1230.514 67.32
1236.116 9.45
1247.442 230.4
1248.652 17.27
1262.582 7.85
1267.52 8.02
1285.803 15.76
1286.761 40.71
1288.877 9.17
1301.537 12.85
1302.581 30.1
1303.491 23.05
1304.904 20.5
1309.134 12.27
1320.571 55.75
1321.492 334.9
1328.406 22.7
1331.191 21.78
1333.514 7.7
1337.978 99.87
1338.664 877.8
1370.499 23.18
1371.256 13.16
1387.592 19.33
1388.352 42.22
1404.923 27.83
1405.654 64.35
1406.595 6.97
1432.506 11.89
1449.722 7.46
1477.563 19.19
1590.338 9.53

[truncated: 45 more sheets: CG3747, CG14977, shrub, CG17597, CG40002, chickadee, 14-3-3zeta, stunted CG9032, CG15386, CG17691, Odorant-binding protein 99c, Cuticular protein 64Ab, Cuticular protein 49Ae, Troponin C at 41C , CG6416, CG7382, CG13920, CG1309, Ribosomal protein S20,  CG10161 …]
