# Supplementary material for: A Mighty Small Heart: The Cardiac Proteome of Adult Drosophila melanogaster
Source: PLoS One. 2011 Apr 25;6(4):e18497. doi: 10.1371/journal.pone.0018497 (PMC3081823; doi:10.1371/journal.pone.0018497)
Supplement: Table S8 — Spectra ST Matches All proteins identified on the basis of a single peptide, regardless of the number of assigned spectra, were cross-referenced against a reference Drosophila peptide dataset as described in the Methods section and Methods S1. Panel 1: The specific criteria for inclusion in these tables are presented. All other panels: Output from Spectra ST searches showing matches between our query spectra and the reference spectra. (XLSX) [file pone.0018497.s008.xlsx]

## Sheet: Criteria
Criteria for inclusion in this table
All proteins identified on the basis of a single unique peptide (>90%) by Scaffold (i.e.Mascot or X!Tandem validated by Peptide Prophet), regardless of the number of spectra, were cross-referenced against the repository of Drosophila proteotypic peptides (Brunner et al.) at the National Institutes of Standards and Technology (NIST) using the web application Spectra ST (Lam et al.), hosted at the …
If the results from spectral matching confirmed the assignment from Scaffold (using Mascot and/or X!tandem and validated with Peptide Pilot), the results were included in this table.
If the high-quality query did not match any reference spectrum with high probability, the spectrum was included in the "High-Quality Spectra" Table S4.
If the high-quality query matched a different protein with high confidence, the query protein was deleted from the master list of proteins.
Format of the table
The peaklist (m/z followed by peak intensity) for the highest-scoring (Mascot or X!Tandem) peptide match is presented in column A.
The output from Spectra ST is presented next to the peaklist. The consensus (reference) spectrum appears on top. The query appears as a mirror image below the reference spectrum.
The peaklist file and name of the identified protein are listed in column D.
The results of the Spectra ST search are displayed below the protein name.
References
Brunner E, Ahrens CH, Mohanty S, Baetschmann H, Loevenich S, Potthast F, Deutsch EW, Panse C, de Lichtenberg U, Rinner O, Lee H, Pedrioli PG, Malmstrom J, Koehler K, Schrimpf S, Krijgsveld J, Kregenow F, Heck AJ, Hafen E, Schlapbach R, Aebersold R. A high-quality catalog of the Drosophila melanogaster proteome. Nat Biotechnol. 2007 May;25(5):576-83. Epub 2007 Apr 22.
Deutsch EW, Lam H & Aebersold R. PeptideAtlas: a resource for target selection for emerging targeted proteomics workflows, EMBO Reports (2008) 9, 5, 429–434
Lam H, Deutsch EW, Eddes JS, Eng JK, King N, Stein SE & Aebersold R. Development and validation of a spectral library searching method for peptide identification from MS/MS. PROTEOMICS (2007) 7(5):655-667.

## Sheet: CG3609
1259.7214730169753 2			A7.3079.3079.2.dta
184.457 8.08
191.168 4.58			CG3609 CG3609-PA [Drosophila melanogaster]
204.112 17.5
207.82 5.37
211.5 4.86
212.375 16.02
215.263 33.61
216.467 5.23
225.174 15.84
226.329 5.88
228.338 6.37
232.248 8.71
240.232 9.43
243.006 76.13
243.934 6.76
245.252 7.02
246.174 21.83
253.305 14.07
256.905 5.62
270.453 9.39
272.261 16.25
274.227 5.82
276.401 8.95
283.097 11.08
290.342 5.31
296.82 14.88
307.419 6.84
308.252 11.33
310.05 13.13
311.799 9.54
319.37 4.11
324.279 8.42
325.348 20.33
326.198 17.05
328.036 20.96
329.507 3.82
332.295 5.1
336.201 6.84
337.857 30.39
338.538 4.02
340.353 13.58
347.379 15.97
351.876 8.53
353.178 87.2
354.204 4.72
356.185 49.41
357.295 5.84
361.351 6.38
365.478 11.25
368.258 4.81
371.124 13.65
374.344 20.04
375.584 4.86
379.227 24.36
382.413 24.11
391.531 6.72
393.184 7.18
397.251 13.2
399.275 70.11
400.156 14.47
401.849 7.77
407.173 13.19
411.421 5.47
412.326 13.56
413.39 6.95
416.542 13.92
417.259 10.09
419.303 14.83
421.242 6.59
425.288 44.4
428.292 11.59
429.196 14.22
431.343 114.0
432.5 23.27
438.576 16.97
439.242 12.99
439.89 19.45
442.328 10.95
443.323 6.41
445.073 6.57
446.71 5.72
448.411 13.85
449.443 5.81
450.358 8.04
451.245 9.48
452.256 40.35
452.91 16.11
456.278 19.24
458.413 16.83
460.249 18.35
462.18 6.32
466.125 43.39
467.346 7.99
472.442 5.97
474.115 13.75
474.767 10.93
475.776 56.86
476.527 14.15
477.233 8.32
478.492 6.66
482.548 6.35
484.318 16.62
484.926 14.0
491.069 34.68
492.012 6.17
494.043 41.49
495.241 18.78
499.219 16.52
499.903 13.16
502.309 11.56
506.311 8.87
507.165 5.1
508.721 50.25
509.467 34.57
510.125 7.6
510.881 12.6
512.169 44.69
513.282 53.86
515.419 21.25
516.134 11.48
519.643 14.35
520.95 9.32
524.423 43.11
525.396 15.07
526.547 7.61
529.724 11.09
530.382 104.6
531.275 22.96
532.385 6.71
533.098 5.05
538.789 4.94
539.994 23.48
542.689 17.74
543.776 16.39
544.42 89.05
545.495 21.36
546.399 10.41
547.378 11.27
550.172 8.74
552.9 31.28
555.263 8.34
556.058 13.21
564.156 12.26
565.686 21.57
566.706 46.22
568.587 10.24
569.313 13.87
570.316 3.76
571.191 19.11
575.964 60.33
576.685 35.98
577.605 15.83
579.558 5.85
585.342 18.85
586.229 21.49
587.454 43.99
588.226 15.37
589.475 8.21
594.117 52.1
595.205 31.07
598.307 54.14
599.317 72.89
601.467 4.88
603.093 45.29
603.791 22.25
604.711 7.55
607.279 22.07
608.438 46.64
612.199 395.8
613.24 142.7
614.063 10.6
615.235 33.6
618.212 23.07
620.507 37.63
621.25 141.3
643.477 18.74
644.31 7.12
650.979 5.47
652.011 17.5
653.241 6.17
654.328 15.28
655.249 15.22
656.323 17.03
658.012 8.57
661.133 22.62
663.403 9.05
666.164 5.85
669.34 10.17
670.91 22.47
671.942 36.79
674.017 12.42
679.884 13.29
682.343 9.3
683.485 8.17
685.464 6.72
688.958 3.99
690.345 21.43
697.238 40.41
709.914 15.4
710.922 8.05
713.333 3.87
715.194 35.46
717.114 9.6
718.417 18.45
729.346 131.0
730.478 46.21
734.45 11.2
737.155 9.7
738.465 8.75
739.459 12.35
756.494 6.56
757.301 5.59
770.477 30.5
771.64 8.75
777.449 12.89
778.449 12.6
780.27 7.93
782.205 6.61
784.256 11.45
786.329 21.39
788.122 6.16
789.698 27.99
791.788 9.76
799.319 14.79
801.22 5.84
806.145 8.13
808.408 62.23
810.307 63.97
811.52 39.41
816.471 122.6
817.539 22.93
821.297 6.96
821.985 11.95
828.369 40.9
840.291 6.32
841.232 4.48
843.609 11.66
845.431 15.63
853.772 12.64
854.432 5.76
859.314 10.48
861.321 18.8
866.998 38.81
867.654 10.1
868.572 8.54
870.35 20.1
872.463 7.41
877.74 5.62
879.287 15.18
883.592 5.02
885.297 35.16
886.597 3.85
889.393 10.66
891.985 17.09
896.161 14.36
901.155 6.56
903.456 426.9
904.553 104.1
910.996 4.54
939.754 25.97
940.562 9.99
949.71 40.01
950.921 10.01
953.621 4.66
958.321 4.45
959.463 6.23
962.006 13.5
965.505 6.38
967.026 15.6
972.871 6.95
977.394 11.74
982.714 4.53
983.351 16.56
991.261 6.41
995.298 66.83
996.204 4.61
997.472 11.15
998.998 7.53
1000.565 10.34
1003.206 14.45
1007.612 18.07
1013.911 24.74
1014.731 25.95
1016.355 42.11
1017.925 32.24
1026.951 13.03
1028.392 10.94
1030.366 3.89
1040.498 5.02
1046.607 11.1
1058.741 10.96
1077.144 4.87
1083.371 7.13
1092.287 29.76
1094.261 44.12
1095.025 19.81
1095.715 16.05
1112.198 71.96
1113.044 29.82
1113.686 25.88

## Sheet: CG33138
1688.1676730169754 2			A9.3647.3647.2.dta
278.291 17.9
280.231 12.69			CG33138 CG33138-PA [Drosophila melanogaster]
297.096 23.44
308.249 17.63
310.461 14.1
312.35 18.45
315.308 14.43
328.292 13.88
339.317 20.28
355.184 22.08
357.832 15.42
371.238 15.48
381.264 28.89
383.494 21.52
389.558 51.4
391.492 13.82
398.602 25.56
401.24 15.73
407.268 15.09
409.325 21.31
411.171 17.31
434.576 23.28
442.107 26.98
443.262 27.71
447.347 16.35
455.353 17.84
458.431 38.22
459.328 26.16
459.979 18.47
466.093 25.49
474.989 25.36
482.358 66.73
483.372 22.8
484.484 22.89
487.301 15.19
496.181 17.92
499.25 12.24
500.711 18.11
504.225 22.5
523.326 14.6
525.926 25.94
529.433 17.22
530.132 13.38
531.891 14.62
538.133 30.04
540.317 19.88
542.374 15.93
551.921 22.71
554.246 57.16
555.187 21.19
557.998 35.24
559.462 12.24
560.613 17.73
566.626 15.85
569.324 65.61
572.187 39.17
573.046 14.35
578.51 17.6
581.178 12.36
583.15 19.26
584.086 16.53
585.355 30.29
591.575 18.3
592.217 22.26
594.368 21.05
597.772 14.92
598.416 13.2
600.474 14.75
602.488 19.84
605.31 16.27
608.013 21.17
611.481 38.8
614.361 21.83
617.304 23.68
623.512 27.1
624.523 14.19
625.473 16.21
628.511 12.5
635.031 16.75
640.225 33.95
641.592 35.79
644.417 66.96
646.688 26.74
650.216 40.35
654.735 30.84
663.636 13.07
665.34 19.21
668.51 22.59
669.384 39.3
670.363 21.26
672.343 17.21
674.248 17.44
676.644 19.59
687.92 26.72
693.375 14.45
694.323 62.29
696.435 31.24
697.547 49.66
698.255 36.11
699.2 21.15
710.372 26.58
712.107 19.35
713.335 26.38
714.512 21.05
715.503 18.01
716.441 41.83
721.302 43.82
722.14 47.17
725.004 53.92
727.452 18.98
728.535 37.47
729.667 30.76
730.744 166.4
731.782 17.59
739.079 23.39
741.929 17.17
743.699 30.37
745.274 20.91
750.57 17.02
758.323 21.5
760.043 18.24
762.302 22.46
765.17 14.61
766.413 21.72
770.998 22.48
773.251 130.8
774.176 32.92
775.406 33.74
777.159 50.37
778.293 23.14
779.073 32.76
780.003 41.07
781.453 51.44
782.369 79.24
783.457 31.1
785.703 42.33
786.491 23.11
787.658 53.05
789.005 56.97
789.935 88.3
791.029 49.07
791.655 113.8
792.722 43.81
793.541 24.95
794.743 43.76
797.43 15.4
798.569 61.42
799.382 79.59
800.251 44.33
801.33 43.05
802.113 32.08
803.301 47.48
804.218 42.24
805.481 43.97
806.734 14.7
807.421 33.3
809.272 31.9
809.96 41.11
810.611 30.53
812.538 41.35
813.515 42.3
814.28 20.59
815.17 32.53
816.254 31.13
816.973 19.47
817.797 50.41
818.421 30.12
820.569 31.62
821.85 58.18
823.273 32.57
825.296 149.8
826.22 263.0
826.998 176.0
827.936 30.85
831.372 49.77
832.16 12.91
834.571 113.1
851.077 12.19
870.152 26.57
875.599 15.17
882.499 21.24
888.282 72.34
889.431 46.27
891.662 13.01
896.681 18.64
897.445 27.49
905.92 18.28
911.001 17.15
913.792 20.83
914.712 28.51
915.62 27.19
921.497 41.52
923.634 12.69
924.941 42.86
926.047 38.57
933.982 14.08
958.432 27.0
962.503 14.14
964.225 13.6
967.825 12.58
968.967 17.7
989.186 16.91
991.923 12.97
992.792 36.94
993.597 25.84
997.405 23.73
998.613 17.22
1002.06 18.2
1003.986 22.89
1004.668 32.94
1005.689 13.38
1006.666 21.7
1011.429 12.24
1013.222 22.42
1019.949 18.66
1021.788 13.23
1024.684 13.37
1036.114 17.84
1037.983 18.06
1042.372 24.42
1051.496 12.16
1052.699 15.07
1054.523 23.47
1057.847 34.24
1058.719 39.61
1059.622 23.77
1060.544 21.8
1068.115 12.21
1073.074 22.5
1081.629 20.21
1083.295 23.87
1086.5 12.09
1087.21 94.93
1089.519 16.45
1091.973 14.36
1094.445 28.69
1097.349 54.74
1098.293 43.56
1099.705 13.76
1101.231 53.07
1102.231 14.88
1105.666 30.11
1107.275 30.5
1115.315 145.0
1116.281 100.8
1117.41 15.56
1118.668 18.06
1123.592 22.61
1134.225 29.68
1140.598 15.76
1149.705 17.22
1152.669 20.12
1155.179 26.8
1156.512 18.28
1161.64 12.22
1167.383 15.98
1172.368 20.25
1178.859 26.49
1179.858 31.23
1185.942 15.52
1187.42 17.04
1188.336 36.51
1190.906 25.95
1205.7 36.71
1208.975 20.88
1209.86 18.37
1225.174 26.97
1226.503 43.2
1227.386 21.65
1234.238 25.43
1244.319 49.59
1245.211 22.08
1246.152 20.25
1249.639 12.54
1253.657 13.08
1259.56 27.11
1271.644 16.6
1279.12 17.71
1292.545 17.84
1306.731 15.35
1324.698 12.58
1326.439 12.47
1327.306 21.16
1328.412 15.75
1331.794 71.37
1332.738 40.23
1333.716 32.69
1350.144 14.91
1360.891 13.99
1379.528 18.8
1385.686 24.39
1410.783 23.03
1415.12 19.12
1459.581 27.11
1510.31 12.95
1521.191 16.39
1522.369 23.21
1523.655 37.41
1524.454 17.91
1602.815 15.33

## Sheet: CG13392
1301.2136730169755 2			S_F7.4306.4306.2.dta
183.184 2.49
197.138 2.77			CG13392 CG13392-PA [Drosophila melanogaster]
199.022 3.62
203.278 10.5
212.966 29.96
216.149 7.22
226.245 4.03
227.036 3.53
228.045 3.18
229.149 7.6
232.059 11.21
241.061 23.6
243.927 7.36
245.235 2.56
247.035 44.56
249.021 4.11
255.263 11.67
257.833 15.91
260.196 14.72
262.294 3.59
267.123 8.12
279.699 3.51
284.116 8.16
286.125 54.96
287.218 6.75
290.981 4.34
293.909 2.02
298.063 8.71
298.975 2.77
300.485 5.3
302.006 10.32
303.059 25.29
314.006 4.16
319.354 14.07
323.238 9.99
328.226 13.09
330.32 9.51
331.743 17.44
338.712 6.59
340.227 13.4
341.211 6.68
345.497 5.17
346.452 8.74
347.433 9.18
354.109 6.04
358.189 2.4
359.135 6.31
362.345 11.93
366.182 40.49
370.772 5.06
373.288 12.32
374.218 15.27
377.316 10.57
380.13 2.83
383.269 11.08
385.238 141.3
388.789 6.96
390.63 5.2
391.417 5.92
394.115 184.1
394.799 9.88
397.378 7.62
401.38 8.51
402.468 4.33
407.364 7.5
412.03 5.13
418.563 13.93
420.415 7.56
422.016 7.41
425.384 11.23
427.286 7.5
429.279 16.02
432.197 4.42
437.685 14.75
438.514 2.23
439.78 5.82
441.572 2.13
442.402 15.45
448.057 13.74
455.36 17.79
456.868 8.9
458.772 9.61
459.419 11.7
465.198 74.15
469.565 8.93
470.728 11.13
476.14 30.08
477.096 15.36
480.355 6.12
481.43 12.19
482.376 7.82
483.342 5.67
488.303 14.46
489.364 7.83
491.355 16.17
493.167 246.3
497.624 6.96
498.257 130.8
499.225 13.47
502.646 6.09
503.253 8.16
504.932 8.29
506.671 17.21
509.033 43.53
515.005 14.01
518.239 5.32
519.132 16.88
522.245 45.62
527.102 10.31
529.198 63.28
530.177 7.31
534.539 11.95
536.387 25.24
537.296 3.9
543.451 28.38
544.32 4.17
547.526 23.47
550.293 6.28
550.957 7.5
555.499 20.89
558.44 7.31
559.507 6.94
560.584 12.93
562.786 10.76
564.689 14.03
568.532 2.07
570.621 7.49
573.612 21.18
574.401 29.07
577.44 7.85
581.395 15.52
585.799 2.72
586.575 3.86
588.939 17.96
590.165 9.86
591.506 14.11
594.851 6.83
596.31 3.67
597.326 6.16
598.585 103.5
599.407 28.03
601.839 12.71
602.509 25.33
606.109 5.2
607.136 4.46
609.794 6.84
611.818 28.79
613.484 41.33
616.688 4.83
617.967 29.05
619.331 42.99
620.926 46.87
621.701 23.37
623.138 2.79
624.403 8.42
626.867 29.51
628.464 25.55
629.13 9.54
632.293 65.08
632.951 42.72
633.566 40.3
637.615 5.55
641.229 112.5
642.037 198.1
642.854 42.78
643.605 3.65
645.224 16.28
648.435 3.15
658.404 6.18
665.212 10.74
669.061 5.11
674.22 4.04
681.801 4.71
686.252 29.62
687.242 3.72
688.74 10.36
691.137 24.45
699.34 4.59
700.117 12.28
700.909 6.07
703.398 81.53
707.671 3.85
710.527 13.18
717.18 3.0
722.229 2.77
726.253 5.44
727.119 9.31
728.417 22.05
729.57 9.59
735.334 5.7
741.086 17.86
742.505 6.42
743.321 14.2
743.957 8.75
745.982 10.13
747.298 15.38
761.658 15.17
765.299 2.49
770.135 5.89
774.582 58.39
775.505 17.47
776.57 10.35
780.066 8.28
786.981 16.48
789.371 33.56
794.361 18.06
797.069 18.14
797.81 21.12
801.422 16.61
804.462 306.2
806.144 10.7
809.412 754.1
810.496 11.46
812.338 20.14
814.172 10.98
814.931 6.62
825.011 6.77
834.354 2.99
838.122 13.89
840.283 4.97
843.351 17.47
844.966 19.43
845.658 29.61
846.506 12.98
847.55 13.27
861.413 3.18
865.791 5.99
866.664 11.46
869.275 38.45
872.439 6.42
874.79 3.63
883.374 29.57
896.965 10.65
899.35 27.9
902.701 11.19
903.5 11.06
904.576 3.3
907.896 4.53
908.518 200.9
917.533 291.6
918.638 3.57
919.565 6.5
921.362 4.57
924.192 7.61
925.302 8.6
927.416 2.38
929.703 7.25
933.929 7.69
937.639 7.72
938.319 7.85
939.571 1.85
940.892 11.05
941.542 4.8
942.877 4.5
953.381 4.49
958.613 13.61
959.599 3.96
962.346 14.07
963.775 5.54
967.484 9.22
968.912 5.77
970.609 26.06
971.341 44.25
980.297 5.29
981.66 3.88
983.685 12.75
993.958 15.99
1002.376 27.08
1003.534 8.52
1004.408 4.58
1007.455 8.32
1009.728 12.0
1012.366 10.91
1016.509 309.4
1017.413 12.79
1024.049 3.92
1029.172 3.08
1032.503 4.35
1040.548 12.86
1042.261 49.45
1046.688 4.89
1047.68 2.25
1049.762 11.83
1055.38 163.2
1061.387 5.33
1070.776 16.27
1073.493 9.65
1074.755 10.25
1085.589 4.15
1086.508 9.3
1095.535 6.77
1117.58 7.24
1126.174 7.04
1136.754 5.94
1137.409 23.01
1146.761 4.02
1150.713 5.65
1155.205 240.7
1155.83 4.1
1174.928 5.2

## Sheet: NEM-sensitive fusion protein 2
1450.8166730169753 2			S_E6.6640.6640.2.dta
209.043 7.75
212.205 5.04			NEM-sensitive fusion protein 2 CG33101-PA [Drosophila melanogaster]
213.05 8.84
215.413 6.13
225.294 5.14
228.507 6.11
239.034 56.56
246.208 5.28
249.221 39.49
249.97 5.25
261.828 7.61
267.113 10.97
275.402 5.86
276.53 7.32
284.087 16.18
285.167 18.53
294.224 11.6
308.443 5.17
309.209 8.59
310.376 7.55
313.225 13.52
325.83 6.13
336.241 6.1
337.037 8.31
338.168 4.8
342.184 15.75
343.031 4.61
350.404 8.12
353.115 5.68
356.253 10.07
358.205 5.92
364.263 12.92
367.333 12.14
369.224 5.98
375.338 34.93
379.04 10.39
380.304 13.76
381.075 4.66
383.315 7.42
384.139 30.34
385.169 7.41
391.309 31.72
397.518 13.66
398.166 13.46
398.986 4.68
402.901 15.26
412.156 7.3
413.488 6.65
416.806 9.33
421.27 10.24
423.167 5.62
424.244 7.09
426.205 9.38
429.298 10.22
435.155 7.79
436.769 22.93
438.469 15.94
442.612 9.63
444.964 14.94
446.357 11.84
448.974 5.1
453.22 18.16
462.081 13.3
467.517 12.03
469.324 12.97
470.565 7.5
475.711 4.81
480.205 128.8
484.649 8.07
485.423 13.26
486.25 33.97
487.749 18.96
488.45 32.02
489.553 12.83
495.401 10.7
497.231 127.0
498.092 21.22
499.491 6.27
504.155 44.31
505.595 6.27
509.15 21.06
510.341 9.87
513.759 7.75
518.263 10.68
523.693 13.45
525.002 7.93
526.245 28.04
531.814 12.62
541.092 14.67
544.508 6.01
545.341 8.82
548.207 7.78
549.163 30.57
550.397 34.24
557.418 12.22
559.416 7.43
560.69 5.59
562.938 57.4
564.076 13.23
566.409 34.0
567.577 12.26
568.984 10.71
569.627 7.88
572.552 13.78
574.029 21.67
574.952 11.82
576.121 24.26
577.027 38.26
579.234 10.95
583.414 16.74
584.136 25.37
585.008 4.62
590.091 16.73
591.321 4.98
591.97 15.74
593.445 19.23
598.305 26.51
601.932 9.75
604.092 9.08
605.307 29.3
610.642 19.23
612.454 23.3
613.448 6.15
617.316 20.56
618.899 6.15
619.996 6.37
620.668 15.49
622.567 8.69
625.269 11.77
629.192 6.89
633.66 117.6
636.331 22.91
638.341 43.88
641.458 4.89
644.073 26.92
644.82 21.2
645.736 18.36
646.431 10.48
647.311 14.62
648.134 9.7
650.372 10.68
651.624 24.79
652.254 46.63
654.482 10.45
655.415 8.29
660.892 7.2
662.612 24.75
663.45 14.86
664.61 8.02
665.284 19.8
667.098 33.2
668.086 23.63
671.326 53.99
672.676 38.91
675.547 8.96
677.382 8.88
678.139 5.9
680.229 65.06
681.118 36.15
682.08 53.96
685.467 6.72
686.218 10.48
687.756 7.46
690.134 102.0
691.137 22.59
692.388 11.72
694.555 26.58
695.543 9.99
699.345 22.62
700.363 6.68
703.812 70.97
704.54 23.05
707.572 166.8
708.212 561.1
709.416 22.85
710.657 46.6
711.489 46.42
716.27 77.0
717.078 216.8
718.158 24.23
736.279 8.52
741.569 6.59
749.584 10.47
751.26 11.46
752.305 26.91
763.025 6.39
763.815 7.95
764.549 14.94
769.347 15.49
772.439 7.51
773.595 12.04
775.635 15.57
780.433 31.21
781.304 5.81
782.145 13.27
788.494 9.92
792.664 14.02
795.446 18.89
796.398 8.86
798.454 13.11
799.329 33.84
825.656 22.56
828.781 6.17
830.282 19.1
846.213 18.77
847.126 14.22
849.635 9.58
854.375 9.08
863.355 4.74
864.502 21.55
865.464 41.03
866.394 5.78
867.426 64.92
876.534 4.91
880.676 10.85
882.804 6.49
886.004 6.62
900.718 42.56
901.597 62.89
902.403 26.75
908.491 13.86
912.545 16.7
914.784 6.23
922.454 10.57
925.433 11.83
928.469 6.07
930.644 21.46
935.21 7.7
939.346 9.18
940.664 6.08
941.481 14.0
947.259 7.33
948.913 23.75
954.422 504.2
960.482 23.5
963.381 31.37
974.763 18.08
978.341 6.83
981.463 10.31
993.477 10.11
994.597 55.71
1003.922 8.64
1014.742 29.7
1015.392 8.0
1021.475 11.0
1024.689 6.44
1027.641 10.05
1031.855 6.06
1035.486 5.77
1038.482 22.18
1044.342 8.96
1052.738 47.93
1053.645 74.48
1058.893 18.3
1059.656 10.65
1065.803 5.76
1075.453 7.46
1076.357 56.7
1077.388 17.61
1081.536 25.45
1083.614 43.58
1093.759 4.75
1100.52 21.66
1106.41 12.48
1108.034 24.2
1119.701 7.05
1121.193 6.23
1123.427 15.92
1125.895 25.44
1130.381 7.37
1141.747 17.99
1142.49 5.56
1149.97 6.72
1154.006 9.98
1161.715 23.76
1167.424 219.6
1168.397 6.21
1170.089 6.31
1174.152 8.59
1179.091 7.05
1187.13 21.84
1188.262 25.0
1194.782 9.23
1205.271 71.84
1206.473 8.59
1212.409 5.25
1234.59 12.14
1239.396 11.7
1240.458 6.39
1266.333 77.22
1275.739 4.76
1276.496 11.8
1277.747 5.5
1286.769 24.6
1287.503 6.45
1295.559 6.9
1302.61 30.27
1303.243 27.35
1304.375 112.2
1305.716 49.03

## Sheet: CG6983 
1831.3336730169754 2			S_F6.5512.5512.2.dta
284.824 2.06
312.966 5.36			CG6983 CG6983-PA [Drosophila melanogaster]
326.177 5.88
362.136 4.57
367.322 11.8
383.266 2.91
397.202 2.73
410.486 9.48
426.937 3.02
430.182 2.0
440.083 3.17
446.296 35.4
458.021 4.78
474.914 4.2
478.229 1.79
482.825 5.82
488.508 9.21
491.781 5.19
506.214 2.76
522.381 10.48
524.445 10.05
525.502 11.44
535.116 4.85
544.084 9.28
555.094 6.29
560.66 6.63
562.446 3.94
563.332 11.65
567.72 22.38
570.198 5.51
575.189 8.28
583.534 11.06
585.556 13.33
586.283 14.78
588.063 8.04
597.104 2.19
603.067 8.28
606.187 5.86
607.39 11.24
616.461 8.53
621.198 11.59
636.296 7.0
637.981 2.22
650.288 24.58
658.69 3.07
673.057 13.66
680.555 2.52
682.524 7.38
686.573 10.0
688.558 12.98
691.345 29.03
696.956 3.63
699.412 15.0
714.969 8.36
715.847 10.18
721.512 18.78
724.46 10.78
725.884 14.57
729.245 2.16
732.507 28.99
733.277 28.29
734.203 8.72
736.539 3.83
750.163 53.74
751.389 12.83
753.336 26.34
762.223 9.48
764.86 4.53
765.493 4.02
768.598 3.0
772.269 1.89
780.563 33.32
783.865 5.64
799.846 9.9
800.718 4.1
801.353 9.58
804.604 41.25
814.146 4.17
819.864 3.29
830.655 19.65
831.274 22.69
843.294 6.15
848.365 15.83
849.598 90.34
850.344 13.11
851.785 6.77
853.446 9.5
854.625 2.81
856.141 2.75
858.883 45.0
860.071 10.33
864.48 22.17
868.232 59.82
869.004 5.74
871.35 3.48
872.653 13.19
873.401 2.05
875.9 2.97
879.413 22.02
880.229 12.72
886.372 18.39
887.385 8.45
889.454 6.32
897.26 60.32
898.363 100.6
898.998 3.95
906.726 104.5
907.753 9.4
941.544 11.05
942.428 1.86
945.799 14.2
955.021 9.77
964.121 16.79
987.331 7.33
998.475 13.34
1008.538 6.75
1016.341 16.6
1026.38 27.06
1043.646 2.0
1069.809 5.61
1070.596 16.54
1080.54 9.83
1091.154 2.73
1110.985 38.61
1113.119 17.59
1128.709 7.03
1132.227 1.38
1141.577 4.26
1143.738 4.49
1146.211 26.22
1157.582 24.03
1164.636 10.37
1172.442 8.61
1182.053 29.67
1216.241 9.83
1221.198 10.94
1223.102 8.16
1225.379 6.78
1239.237 14.32
1270.467 5.93
1289.192 8.73
1324.728 6.68
1328.743 13.96
1339.548 8.27
1347.736 2.24
1350.231 1.93
1357.46 41.46
1359.281 2.0
1361.616 6.06
1366.453 22.95
1386.342 95.81
1387.422 9.44
1388.707 4.73
1418.141 4.01
1456.516 10.19
1472.532 9.68
1481.551 9.04
1494.6 7.8
1501.279 30.72
1516.519 11.47
1527.477 7.49
1528.271 11.59
1570.519 1.81
1585.513 15.03
1588.35 55.52
1626.656 2.78
1655.962 9.57
1657.963 24.6
1684.805 9.5
1716.31 111.4
1798.488 4.17

## Sheet: fructose-1,6-bisphosphatase 
998.7554730169754 2			S_F8.7402.7402.2.dta
157.577 7.63
160.154 2.41			fructose-1,6-bisphosphatase CG31692-PA, isoform A [Drosophila melanogaster]
161.093 6.75
169.128 4.29
170.116 4.49
171.965 8.82
172.962 24.24
181.155 7.41
182.369 7.65
184.296 7.61
185.218 4.87
195.978 2.06
198.005 20.59
201.164 40.78
202.123 1.97
208.935 10.16
210.442 10.59
213.033 11.99
216.002 6.29
216.927 4.47
226.243 24.38
227.257 4.32
232.182 5.43
235.074 11.05
240.424 3.18
241.9 3.11
244.184 61.53
245.034 26.83
246.143 1.73
251.17 1.91
253.999 4.83
255.171 4.61
261.393 5.13
262.894 46.6
267.26 13.65
267.971 5.4
269.065 3.48
281.112 4.09
286.262 8.03
291.426 13.8
294.297 1.2
295.259 10.92
296.146 60.31
297.36 14.14
299.616 8.21
302.0 5.04
305.296 3.39
307.314 25.56
311.103 9.83
312.229 7.8
313.418 21.04
314.19 71.81
318.195 10.65
324.899 9.21
333.201 7.63
336.412 12.8
337.094 14.19
340.313 4.36
341.093 5.76
343.324 47.57
344.531 23.04
348.246 2.22
351.874 5.57
352.531 11.42
354.366 7.66
356.362 7.77
360.077 7.44
361.939 7.79
364.213 3.78
365.372 3.58
366.442 12.61
367.325 1.35
372.134 11.17
373.204 11.65
376.87 8.69
378.121 18.07
381.066 3.52
384.327 2.12
389.847 1.55
392.23 18.79
392.933 19.09
399.34 139.2
400.358 22.72
405.774 13.5
408.277 2.46
409.102 5.2
411.566 5.35
420.091 36.05
422.348 7.81
426.476 22.31
427.242 19.4
428.124 17.79
429.163 19.15
435.503 34.39
437.146 13.8
440.136 11.92
441.389 36.99
442.231 15.84
444.18 8.43
446.562 2.24
450.225 22.58
451.545 10.59
452.194 5.06
452.848 10.29
454.203 24.14
454.857 6.11
456.379 1.87
457.64 4.4
458.324 10.83
460.436 3.17
463.277 20.44
464.48 2.27
469.863 11.05
475.834 2.44
476.76 33.16
480.654 32.59
481.312 107.3
482.175 103.9
483.213 107.8
485.167 10.58
486.419 7.82
487.704 15.68
490.402 292.6
491.417 45.0
497.904 17.79
498.731 10.73
520.611 26.09
523.889 3.95
525.109 6.13
535.711 15.24
542.411 1.84
547.641 4.08
548.444 26.01
549.239 28.24
550.104 12.02
554.523 5.85
571.35 67.26
571.97 8.57
572.595 21.09
577.038 8.88
578.761 26.13
609.417 3.69
620.281 7.86
621.426 13.7
623.127 71.08
624.246 7.85
633.715 19.67
635.62 4.48
640.713 5.1
641.511 4.77
642.394 4.03
646.151 2.0
655.106 20.72
655.734 5.05
657.086 25.14
660.761 8.68
663.403 7.86
669.341 3.07
682.256 25.28
684.352 126.2
685.503 52.56
686.161 5.34
692.079 5.46
694.34 4.12
699.556 2.97
700.492 9.58
710.46 14.65
711.22 16.38
712.601 8.57
726.215 13.6
728.354 10.77
732.05 1.68
735.244 34.96
736.52 48.08
737.248 28.58
752.187 9.55
754.212 52.06
755.194 34.31
757.623 6.53
760.517 4.42
768.695 6.63
770.581 6.34
771.364 6.51
773.474 3.37
783.374 11.21
786.108 5.2
797.423 264.0
798.44 141.6
805.404 10.07
809.53 31.97
810.52 12.52
813.247 2.76
815.478 8.88
823.407 15.73
824.243 3.97
833.498 4.79
842.53 8.02
851.185 5.04
853.154 25.65
868.536 10.95
884.499 16.5
885.52 32.05
894.709 9.33

## Sheet: Dynamin associated protein 160 
1487.5096730169755 2			S_E3.4158.4158.2.dta
226.171 14.58
232.982 7.96			Dynamin associated protein 160 CG1099-PA, isoform A [Drosophila melanogaster]
237.196 23.96
238.269 9.17
245.035 46.66
245.945 5.79
255.156 6.72
259.195 12.81
263.849 15.13
277.846 3.94
279.13 11.64
280.126 13.89
282.058 5.81
286.101 11.79
289.19 4.23
294.485 7.12
295.234 8.82
296.142 9.3
297.271 5.63
301.248 3.09
302.149 8.38
312.24 79.45
313.249 88.0
314.412 8.19
315.161 6.33
320.236 5.7
321.014 5.42
325.209 12.1
332.241 9.72
339.495 10.55
341.304 7.07
342.919 5.88
346.429 41.49
347.413 5.68
348.339 3.19
356.997 3.86
358.248 8.72
362.335 12.52
366.328 2.79
368.504 2.73
369.502 7.25
377.029 9.32
384.268 16.73
385.314 7.11
388.827 10.2
392.142 6.11
393.26 25.95
394.086 12.56
408.103 4.45
411.333 255.4
412.243 32.37
413.016 7.19
414.479 14.68
417.321 2.72
420.998 25.24
424.283 5.75
426.261 5.43
428.358 13.67
429.022 7.03
436.78 12.88
446.47 7.89
447.325 4.9
454.358 4.39
456.431 6.14
457.483 4.53
458.355 18.85
467.515 61.46
474.341 14.6
475.237 14.75
476.341 141.6
476.987 9.92
478.844 13.91
490.086 10.97
493.255 7.75
494.134 7.27
507.258 3.63
511.7 22.24
513.084 9.6
517.939 11.23
519.217 5.34
524.213 23.71
526.255 13.28
532.361 3.23
533.919 17.42
534.621 28.05
536.005 156.1
536.88 9.34
538.352 11.54
539.238 8.68
541.294 10.09
542.099 6.85
542.994 17.16
548.425 17.32
555.099 8.99
558.344 3.72
561.608 12.56
562.283 13.91
563.023 7.99
563.996 7.09
569.131 3.36
573.223 3.92
575.345 95.41
576.009 3.75
579.3 19.74
580.115 7.85
581.549 11.34
582.288 6.03
586.511 34.62
587.748 369.4
588.423 118.4
592.363 5.81
595.571 5.07
596.949 7.54
609.222 69.99
610.046 8.51
611.003 19.99
612.141 23.61
612.918 12.49
614.609 9.35
615.534 31.89
616.225 13.02
617.343 6.16
620.723 13.93
621.654 29.0
622.521 34.98
624.228 3.54
629.517 10.83
634.841 8.16
636.226 16.26
638.971 11.64
639.606 7.21
640.374 7.23
641.351 14.16
642.823 61.51
643.495 81.33
644.519 13.92
647.264 13.98
651.798 179.8
652.466 49.69
655.363 14.07
656.404 36.24
657.36 18.05
659.385 11.07
661.423 7.79
663.579 17.84
665.129 38.79
666.285 37.07
674.382 63.39
675.43 15.43
676.661 16.07
678.471 157.6
679.708 83.77
680.409 12.67
683.594 5.02
685.396 21.85
689.851 3.32
691.083 31.62
691.752 60.77
697.591 11.36
698.775 18.92
700.194 51.88
705.725 26.45
708.979 60.77
712.217 24.09
713.136 27.26
715.201 9.04
716.326 19.32
717.57 36.43
722.23 41.77
725.687 86.98
726.57 83.4
727.424 25.01
728.852 11.37
730.314 8.51
731.657 6.86
734.789 386.1
735.538 329.3
736.369 118.9
737.601 28.72
738.318 10.23
751.721 3.0
762.063 9.91
773.627 16.71
780.509 6.49
786.365 4.55
791.06 28.87
791.918 10.04
795.836 3.79
801.445 13.65
804.355 11.07
805.313 7.5
809.27 5.68
810.624 7.96
813.283 45.26
814.568 9.08
821.661 66.02
822.544 163.3
823.625 40.44
825.329 3.34
826.343 5.33
828.184 10.74
830.329 9.36
847.894 9.44
851.181 27.85
858.216 10.44
866.454 12.95
869.683 5.83
875.363 13.43
878.274 84.23
879.351 11.88
894.512 11.14
895.622 4.23
896.392 3.4
898.538 5.76
899.531 4.38
901.327 14.02
902.252 26.93
906.168 2.92
908.344 10.99
909.671 10.3
911.31 12.84
912.227 23.2
912.849 17.3
914.395 5.88
924.239 5.58
933.471 10.95
935.377 8.82
939.522 21.74
941.176 15.86
943.605 17.29
945.465 7.48
949.521 81.34
950.617 3.18
951.742 10.24
954.321 7.19
955.517 3.2
961.445 24.78
963.253 26.86
964.207 30.56
966.198 16.69
1013.609 26.84
1014.488 12.8
1023.872 11.49
1026.607 3.69
1027.266 4.28
1035.399 6.86
1040.006 27.78
1040.948 12.87
1047.92 17.31
1049.638 15.53
1053.716 20.59
1058.561 23.38
1059.395 5.13
1062.459 10.16
1063.434 8.12
1066.087 14.98
1067.171 7.08
1068.25 16.42
1070.801 2.74
1075.847 4.08
1076.879 14.91
1085.775 17.8
1103.456 17.62
1106.477 5.54
1107.313 4.63
1108.859 13.45
1116.582 7.74
1122.578 6.52
1125.094 14.91
1135.963 8.13
1141.702 39.16
1142.333 28.7
1146.737 3.24
1149.286 10.72
1150.593 2.76
1154.897 6.32
1158.459 10.43
1165.266 8.36
1172.659 6.45
1174.552 601.6
1175.586 327.7
1182.605 9.7
1197.391 4.85
1200.777 11.82
1229.663 2.73
1247.433 5.33
1253.528 7.25
1257.346 5.01
1268.949 12.87
1269.594 6.19
1271.721 12.41
1285.508 3.11
1295.578 4.07
1302.515 12.87
1312.376 30.52
1313.547 106.5
1314.443 13.73
1340.737 12.67
1341.472 12.56
1359.621 19.27

## Sheet: Grasp65
1535.7076730169754 2			S_F8.5010.5010.2.dta
240.867 6.13
246.157 5.19			Grasp65 CG7809-PA [Drosophila melanogaster]
266.324 14.19
267.244 18.8
274.16 11.39
276.017 11.13
278.11 6.45
282.184 3.71
286.147 5.42
288.389 27.37
289.682 13.0
294.569 12.26
295.188 19.91
295.906 5.0
299.292 4.66
305.351 7.9
318.994 5.75
332.132 5.51
339.294 7.28
343.426 10.67
345.059 3.89
357.09 18.93
361.447 22.32
364.084 7.95
371.474 5.33
376.161 3.58
379.253 29.07
384.189 5.87
387.372 11.91
389.01 14.94
390.355 16.12
392.455 6.26
393.649 3.94
394.295 50.03
399.141 6.57
400.384 6.22
406.174 22.8
415.266 3.0
418.971 9.71
456.284 27.39
461.118 8.16
463.302 20.29
464.258 3.21
470.514 6.47
472.256 8.15
475.259 6.07
476.86 9.44
482.399 7.21
490.029 8.34
492.316 3.98
502.033 15.63
506.233 10.48
509.055 7.5
509.692 13.34
511.61 7.74
516.264 33.61
517.072 6.07
518.562 19.82
520.84 40.45
521.719 29.68
524.073 3.46
528.148 7.87
528.845 3.53
531.022 15.45
531.623 6.77
539.615 9.08
544.052 12.27
556.057 15.56
557.35 18.61
559.017 4.23
559.762 9.2
561.782 22.45
563.424 14.09
573.728 22.26
577.308 14.67
579.072 13.3
580.306 23.18
581.51 3.51
585.344 5.51
587.211 23.54
591.547 50.18
594.285 9.66
596.333 5.84
597.682 13.11
599.468 4.2
600.953 18.6
601.556 49.01
604.244 7.58
605.465 3.24
608.305 25.34
610.476 7.89
616.434 4.1
617.522 9.34
619.189 68.94
621.146 46.05
623.507 5.19
625.831 35.75
628.059 24.32
628.963 3.58
630.442 5.83
631.109 17.43
631.999 11.85
636.758 37.24
637.427 9.92
638.148 9.12
639.495 18.07
642.039 19.59
643.56 13.41
644.967 4.09
645.951 24.01
648.431 15.56
650.357 6.65
652.162 20.45
653.313 5.75
654.111 39.33
654.712 15.86
656.154 25.02
658.042 35.53
660.632 15.03
661.324 25.01
662.533 19.04
665.686 6.79
668.274 27.39
670.903 29.04
672.335 5.83
676.184 16.86
677.029 11.64
679.596 32.29
683.344 8.18
685.93 7.54
688.83 14.46
690.694 9.71
693.536 27.72
694.812 9.81
695.428 5.98
697.184 4.97
702.342 46.94
703.885 31.97
708.15 32.69
710.312 14.3
713.669 6.36
714.958 49.14
716.136 11.55
718.845 24.12
723.459 10.8
725.398 11.82
726.793 4.1
728.331 26.53
730.376 7.8
731.651 14.15
732.491 63.67
733.153 38.8
734.388 3.44
735.487 31.26
738.323 3.94
739.573 18.01
740.337 6.51
741.159 17.67
742.087 5.69
742.695 7.17
744.469 19.33
745.582 81.33
746.213 18.27
746.828 73.59
750.248 151.8
751.312 313.5
752.411 36.34
753.305 13.81
756.234 9.21
759.183 574.1
760.091 53.43
767.408 12.17
780.551 9.22
784.273 32.24
787.769 6.33
790.219 25.12
791.675 6.06
798.409 17.32
805.367 23.94
810.498 16.98
816.059 19.22
818.542 5.05
827.498 6.61
842.426 8.42
853.53 8.16
858.584 16.54
860.474 91.59
864.265 25.44
865.272 26.2
866.658 8.53
872.818 11.41
874.766 21.57
882.446 5.78
888.276 11.12
899.152 20.05
900.011 8.12
903.386 4.46
904.187 12.42
905.636 5.13
907.272 6.71
916.371 22.54
917.483 223.9
919.476 27.56
922.029 10.92
929.938 8.41
936.601 13.78
937.623 5.3
942.971 8.13
944.298 10.43
947.65 5.37
957.688 6.12
959.246 7.73
961.698 7.58
966.403 3.79
967.989 5.96
978.369 77.98
979.381 63.23
980.373 8.7
986.491 10.96
991.367 10.59
994.524 14.97
995.452 4.37
996.449 4.83
997.055 4.31
1004.464 5.45
1005.542 11.12
1006.209 6.65
1009.499 3.46
1014.015 36.31
1016.499 171.5
1017.596 6.31
1018.809 5.22
1020.089 8.98
1024.549 5.38
1031.31 17.5
1032.181 14.19
1050.415 10.21
1054.336 9.85
1057.312 14.77
1080.368 3.03
1092.594 4.4
1121.792 4.56
1124.537 58.95
1129.52 23.29
1132.557 28.6
1135.488 9.8
1141.433 138.7
1142.386 54.54
1143.515 16.82
1144.756 10.01
1146.045 14.13
1146.996 38.26
1149.339 6.85
1150.038 4.93
1157.499 4.48
1159.275 7.5
1162.574 8.4
1169.395 5.4
1172.262 7.11
1175.006 5.49
1179.075 10.07
1179.696 63.16
1182.434 19.53
1195.808 7.24
1197.486 35.99
1198.338 13.99
1199.283 15.83
1200.19 21.95
1201.254 44.06
1215.345 3.31
1217.947 3.06
1233.473 21.04
1240.366 116.5
1241.397 34.28
1242.09 4.33
1242.692 12.2
1244.506 15.27
1245.402 10.93
1246.751 6.58
1255.38 4.65
1262.018 37.48
1262.668 8.46
1264.349 3.91
1266.878 27.19
1305.642 9.55
1307.427 9.86
1321.758 15.38
1323.573 56.57
1326.628 5.73
1337.539 3.74
1342.031 5.78
1342.808 4.64
1343.686 50.59
1345.458 11.3
1360.012 19.08
1361.403 55.99
1382.358 6.7
1388.475 30.16
1390.471 19.98
1403.627 14.61

## Sheet: Ras-related protein
1577.2884730169753 2			S_E6.5827.5827.2.dta
234.343 6.86
240.152 5.64			Ras-related protein CG2849-PC, isoform C [Drosophila melanogaster]
246.244 9.35
270.112 8.73
280.258 15.03
283.233 8.92
286.299 6.35
288.416 17.86
289.373 8.92
290.361 14.03
294.299 10.4
294.943 11.47
296.243 12.22
298.226 29.34
311.204 12.06
314.046 11.76
315.099 40.86
322.682 16.36
328.231 49.39
341.299 8.58
348.217 12.83
353.033 13.64
359.306 8.34
363.068 5.38
365.592 14.04
372.349 12.04
375.177 5.58
382.039 11.66
383.28 14.46
384.222 11.86
385.172 10.96
386.332 11.52
406.275 34.13
410.114 6.46
416.392 5.91
418.098 12.52
418.862 11.34
419.488 5.09
423.55 6.29
425.362 15.29
426.479 16.96
427.218 7.81
429.278 5.1
434.418 6.43
437.196 16.84
440.069 5.89
441.308 16.05
442.145 6.49
447.458 5.24
451.593 12.8
456.926 25.44
458.199 17.15
459.335 9.15
460.106 6.73
462.475 9.76
468.097 54.16
469.452 5.25
470.95 14.15
473.206 11.71
479.41 7.81
480.396 6.13
485.548 11.47
486.334 20.61
490.51 5.26
492.268 6.61
493.207 15.07
497.145 55.79
503.152 11.42
506.082 24.83
507.575 11.32
508.462 18.31
511.359 6.64
514.301 143.7
525.349 37.42
526.238 74.65
527.731 5.84
528.45 11.56
529.306 10.6
535.295 89.28
536.87 8.85
539.318 22.65
542.694 29.66
546.329 5.3
547.014 10.81
550.984 49.32
553.071 7.28
556.483 26.45
557.408 14.33
559.407 27.76
563.382 43.0
568.35 28.36
572.125 15.33
573.356 16.43
578.185 27.2
579.295 14.15
580.453 5.58
581.068 7.2
583.184 14.28
584.01 41.25
585.35 232.7
589.334 15.14
596.146 8.89
596.756 13.18
603.619 7.32
604.233 6.56
604.903 31.86
610.568 12.92
613.228 29.78
615.312 25.1
617.0 6.42
621.44 21.24
623.534 6.69
629.952 11.38
631.706 24.36
634.557 51.34
637.218 24.01
638.028 65.41
639.193 7.41
641.141 10.31
642.371 24.86
643.292 6.59
646.433 26.53
647.35 7.0
648.269 9.63
649.205 7.43
650.788 7.12
654.644 6.8
656.279 62.09
657.052 12.98
658.271 21.77
658.882 24.21
660.378 15.94
661.234 45.28
662.532 17.99
663.896 19.41
666.527 129.1
667.395 88.47
672.498 6.71
673.298 17.99
674.46 12.05
675.201 9.31
677.445 5.35
681.041 191.3
682.387 33.4
684.23 840.5
684.967 36.14
687.241 20.93
689.874 341.5
690.603 20.37
692.058 10.08
692.966 24.82
696.06 33.24
700.305 7.74
704.556 28.72
705.771 11.53
710.593 27.3
711.654 9.17
715.36 19.85
719.531 7.76
722.452 6.01
724.34 8.72
725.044 61.04
728.178 15.37
729.602 22.27
730.574 7.12
732.487 18.13
734.396 5.87
736.412 24.17
739.952 11.82
743.294 9.22
744.294 41.62
745.581 7.4
748.335 34.41
749.164 32.0
750.03 7.07
752.34 6.27
753.484 7.35
754.296 28.93
755.831 13.28
757.292 23.68
758.251 48.81
761.495 11.71
766.459 124.3
768.219 10.26
768.902 25.92
770.208 150.8
771.194 180.7
771.823 104.5
772.499 54.5
773.313 6.77
775.35 12.48
776.69 15.16
779.505 134.8
780.472 115.7
818.829 6.92
822.403 23.65
823.028 5.6
833.307 9.97
834.464 9.81
845.105 5.21
847.548 36.99
848.538 13.53
849.337 7.24
852.126 16.95
854.44 7.08
876.394 6.48
888.401 10.66
891.539 5.5
892.425 14.3
894.37 1235.0
895.123 5.44
896.264 7.25
898.488 5.26
911.515 20.09
916.348 6.02
921.547 7.13
926.503 8.53
929.435 23.32
939.631 5.41
944.297 25.28
950.317 18.83
954.939 13.28
968.098 10.97
972.659 15.94
974.594 25.12
977.33 12.79
980.805 29.17
982.256 8.4
984.542 7.01
989.264 7.74
992.789 60.02
993.47 523.9
998.454 12.9
1003.775 7.73
1004.586 12.98
1009.283 7.69
1022.443 6.58
1023.511 8.05
1026.573 9.53
1030.702 14.19
1031.922 6.38
1038.581 8.03
1042.794 27.11
1043.428 79.03
1048.535 38.55
1049.475 19.07
1051.682 7.11
1053.034 10.89
1055.199 10.12
1064.556 438.1
1068.507 14.05
1076.31 13.19
1080.182 30.62
1088.505 8.52
1089.728 25.29
1093.623 6.45
1102.047 11.54
1106.454 21.86
1113.458 14.48
1130.508 29.84
1134.628 11.53
1140.151 18.19
1158.164 33.51
1159.208 22.86
1159.854 17.67
1161.397 9.85
1172.002 14.87
1172.656 75.5
1184.655 5.7
1187.567 10.48
1194.24 26.92
1195.728 22.18
1199.133 8.41
1205.693 10.0
1218.624 8.05
1238.771 9.1
1250.528 316.8
1251.128 6.84
1259.134 10.34
1285.538 7.3
1290.668 7.12
1306.739 15.67
1324.746 11.78
1325.622 14.83
1328.61 8.53
1334.295 13.05
1341.046 13.85
1342.456 11.52
1343.539 14.39
1360.613 14.06
1361.79 14.9
1366.66 5.15
1378.397 105.8
1387.447 6.32
1403.235 11.06
1411.277 9.64
1412.386 13.53
1429.568 43.98
1430.445 7.78
1431.428 34.93

[truncated: 36 more sheets: CG3999 , CG4038,  CG12151-P, upheld CG7107-PG, CG31195, Ribosomal protein L35A , CG11089, mrps11, Hemolectin, CG10616, CG8531, Contactin, CG4673, CG8475, CG1893, CG5073, CG32549, lectin-28C, CG13284, Rpn9 …]
