# Supplementary material for: A Mighty Small Heart: The Cardiac Proteome of Adult Drosophila melanogaster
Source: PLoS One. 2011 Apr 25;6(4):e18497. doi: 10.1371/journal.pone.0018497 (PMC3081823; doi:10.1371/journal.pone.0018497)
Supplement: Table S9 — High-Quality Spectra Proteins identified on the basis of high quality spectra, as defined in the Methods section and Methods S1, but for which no match could be found using Spectra ST. Panel 1. The specific criteria for inclusion in these tables are presented. All other panels: High-quality spectra are presented, along with the explicit attributes of the spectra that conform to established CID-induced fragmentation biases. (XLSX) [file pone.0018497.s009.xlsx]

## Sheet: Criteria for Inclusion
Criteria for inclusion in this table
All proteins identified on the basis of a single unique peptide by Mascot or X!Tandem (regardless of the number of spectra) were cross-referenced against the repository of Drosophila proteotypic peptides (Brunner et al.) at the National Institutes of Standards and Technology (NIST) using the web application Spectra ST.
High-quality query spectra, for which there was no match to known proteotypic reference spectra, are presented here.
All "high-quality" spectra in the table have a match probability >90% based on Scaffold's implementation of Peptide Prophet and have been evaluated manually.
Evaluation criteria were essentially as described by Tabb et al., and are number-coded for brevity.
1. b- or y-ion ladders with few gaps
2. complementarity between b- and y-ion series
3. Few unmatched peaks
4. Fragmentation bias: N-terminal to Proline
5. Fragmentation bias: N-terminal to Glycine and Serine
6. Fragmentation bias: C-terminal to Valine, Isoleucine and Leucine
7. Fragmentation bias: C-terminal to Aspartate and Glutamate
Format of the table
The highest-scoring spectrum (by Mascot or X!Tandem) for each protein is presented.
The fragmentation table is presented below the spectrum.
The peaklist file, name of the identified protein, and the evaluation criteria are listed to the right of the fragmentation table.
References
Brunner E, Ahrens CH, Mohanty S, Baetschmann H, Loevenich S, Potthast F, Deutsch EW, Panse C, de Lichtenberg U, Rinner O, Lee H, Pedrioli PG, Malmstrom J, Koehler K, Schrimpf S, Krijgsveld J, Kregenow F, Heck AJ, Hafen E, Schlapbach R, Aebersold R. A high-quality catalog of the Drosophila melanogaster proteome. Nat Biotechnol. 2007 May;25(5):576-83. Epub 2007 Apr 22.
Tabb DL, Friedman DB, Ham AJ. Verification of automated peptide identifications from proteomic tandem mass spectra. Nat Protoc. 2006;1(5):2213-22.

## Sheet: CG9099
								S_F5.6975.6975.2.dta
								CG9099 CG9099-PA [Drosophila melanogaster]
								1,2,4,6

## Sheet: Sug
								S_F911.3150.3150.2.dta
								Sug CG7334-PA, isoform A [Drosophila melanogaster]
								1,2,3,5

## Sheet: CG4447
								S_A5Dros.2250.2250.2.dta
								CG4447 CG4447-PA [Drosophila melanogaster]
								1,2,3,7

## Sheet: CG3610
								S_A5Dros.1391.1391.2.dta
								CG3610 CG3610-PA [Drosophila melanogaster]
								1,2,6

## Sheet: CG15168
								S_A2Dros.1416.1416.2.dta
								CG15168 CG15168-PA [Drosophila melanogaster]
								1,2,6

## Sheet: CG10007-PA
								S_E7.7302.7302.2.dta
								Transport and Golgi organization 9 CG10007-PA [Drosophila melanogaster]
								1,2,4,6

## Sheet: delta-coatomer protein
								S_F5.3213.3213.2.dta
								delta-coatomer protein CG14813-PA [Drosophila melanogaster]
								1,2,3,4,5

## Sheet: acyl-Coenzyme A oxidase
								S_E910.7074.7074.2.dta
								acyl-Coenzyme A oxidase at 57D proximal CG9707-PA [Drosophila melanogaster]
								1,2,5,6,

## Sheet: Nup62
								S_F8.4767.4767.2.dta
								Nup62 CG6251-PA [Drosophila melanogaster]
								1,2,4,6

[truncated: 116 more sheets: CG4851, CG5390, CG10361, CG32030, CG6018, CG13890, CG4586, Serine protease inhibitor 1, CG16771 , CG9465 , CG3792, CG5379, mrps5, Tim9b CG17767-PC, CG3156, CG3906, sec5 CG8843-PA, CG5188 , CG30084-PG, isoform G, CG9416  …]
