# Supplementary material for: A Mighty Small Heart: The Cardiac Proteome of Adult Drosophila melanogaster
Source: PLoS One. 2011 Apr 25;6(4):e18497. doi: 10.1371/journal.pone.0018497 (PMC3081823; doi:10.1371/journal.pone.0018497)
Supplement: Table S10 — Proteins Absent from the Dataset of Brunner et al . Panel 1: Protein isoforms and clusters were mapped to their CG identifiers and screened against the dataset of Brunner et al. [24]. Overlap is designated with “1” in column C; proteins unique to our study are designated “0”. Panels 2–4: Analysis of the proteins unique to our dataset with respect to the three branches of gene-ontology. Panel 2: Biological Processes. Panel 3. Cellular Components. Panel 4. Molecular Functions. (XLSX) [file pone.0018497.s010.xlsx]

## Sheet: Clusters not in Brunner et al. 
Implied protein(s) (GI identifier)	Implied protein(s) (CG identifier)	Overlap with Brunner et al. (1= seen in both studies / 0= seen only in Foster et al.)
gi|116007162,gi|116007164,gi|18859967	CG9057-PA,CG9057-PB,CG9057-PC	0
gi|116007166,gi|116007168,gi|24642336,gi|24642338,gi|24642340,gi|45555473,gi|45555485,gi|45555505,gi|45555521	CG18102-PA,CG18102-PB,CG18102-PC,CG18102-PD,CG18102-PE,CG18102-PF,CG18102-PG,CG18102-PH,CG18102-PI	0
gi|116007314,gi|116007316,gi|21356001	CG6105-PA,CG6105-PB,CG6105-PC	0
gi|116007382,gi|116007384,gi|116007388	CG17489-PA,CG17489-PB,CG17489-PC	0
gi|116007548,gi|24585803,gi|24585805	CG3107-PA,CG3107-PB,CG3107-PC	0
gi|116007558,gi|24586058	CG9432-PB,CG9432-PD	0
gi|116007742,gi|21687155	CG13586-PA,CG13586-PB	0
gi|116007804,gi|116007806,gi|24662934,gi|24662938	CG5946-PA,CG5946-PB,CG5946-PC,CG5946-PD	0
gi|116007846,gi|78707507	CG8779-PA,CG8779-PB	0
gi|116007908,gi|116007910,gi|116007912	CG40049-PA,CG40049-PB,CG40049-PC	0
gi|116007970,gi|45550701	CG1041-PA,CG1041-PB	0
gi|116008116,gi|116008118,gi|17137190,gi|24651030	CG11958-PA,CG11958-PB,CG11958-PC,CG11958-PD	0
gi|116008170,gi|24663646	CG11271-PB,CG11271-PC	0
gi|116008559,gi|24643856,gi|24643858,gi|28571466,gi|28571471,gi|45553241	CG1106-PA,CG1106-PB,CG1106-PD,CG1106-PF,CG1106-PG,CG1106-PH	0
gi|160714828,gi|160714832	CG17691-PA,CG17691-PC	0
gi|161075876,gi|62862480	CG40042-PA,CG40042-PB	0
gi|161076128,gi|161076131,gi|62862016,gi|62862018	CG17420-PA,CG17420-PB,CG17420-PC,CG17420-PD	0
gi|161076407,gi|161076409,gi|24586458,gi|24586460	CG11198-PA,CG11198-PB,CG11198-PC,CG11198-PD	0
gi|161076454,gi|17137298	CG8808-PA,CG8808-PB	0
gi|161077125,gi|20130025,gi|24653942,gi|24653944	CG8256-PA,CG8256-PB,CG8256-PC,CG8256-PD	0
gi|161077148,gi|20130057	CG4750-PA,CG4750-PC	0
gi|161077258,gi|17137010	CG7563-PB,CG7563-PC	0
gi|161077298,gi|161077300,gi|161077304	CG30296-PC,CG30296-PE,CG30296-PG	0
gi|161077342,gi|161077344,gi|20130215	CG10320-PA,CG10320-PB,CG10320-PC	0
gi|161077725,gi|161077727,gi|161077729,gi|18859751	CG15211-PA,CG15211-PB,CG15211-PC,CG15211-PD	0
gi|161077754,gi|45554791,gi|45554813	CG1725-PB,CG1725-PH,CG1725-PL	0
gi|161077848,gi|161077850,gi|17137000,gi|24642310,gi|45555323,gi|45555333	CG9012-PA,CG9012-PB,CG9012-PC,CG9012-PD,CG9012-PE,CG9012-PF	0
gi|161077949,gi|24643158	CG7378-PA,CG7378-PB	0
gi|161078016,gi|21355167	CG14648-PA,CG14648-PB	0
gi|161078102,gi|161078104,gi|28573155,gi|28573157,gi|28573159,gi|28573161,gi|28573163	CG31349-PA,CG31349-PB,CG31349-PC,CG31349-PE,CG31349-PF,CG31349-PG,CG31349-PH	0
gi|161078106,gi|24645208	CG11963-PA,CG11963-PB	0
gi|161078230,gi|21357287	CG6225-PA,CG6225-PB	0
gi|161078308,gi|24647027,gi|28571716	CG4247-PA,CG4247-PB,CG4247-PC	0
gi|161078461,gi|24648574	CG5630-PA,CG5630-PB	0
gi|161078465,gi|24648643	CG5802-PA,CG5802-PB	0
gi|161078633,gi|161078635,gi|161078637,gi|24650122	CG5028-PA,CG5028-PB,CG5028-PC,CG5028-PD	0
gi|161079187,gi|24651333	CG15531-PA,CG15531-PB	0
gi|161079282,gi|17136980,gi|17136982,gi|24651441,gi|24651443,gi|24651445,gi|24651447	CG1539-PA,CG1539-PB,CG1539-PC,CG1539-PD,CG1539-PE,CG1539-PF,CG1539-PG	0
gi|161082060,gi|161082065	CG33275-PA,CG33275-PB	0
gi|161085839,gi|17136866,gi|24668762,gi|24668769,gi|24668773,gi|24668777	CG8385-PA,CG8385-PB,CG8385-PC,CG8385-PD,CG8385-PE,CG8385-PF	0
gi|17136200,gi|17136202,gi|17136204	CG9042-PA,CG9042-PB,CG9042-PC	0
gi|17136264,gi|17136266,gi|45553445,gi|45553447	CG5730-PA,CG5730-PB,CG5730-PC,CG5730-PD	0
gi|17136346,gi|62471709	CG4696-PA,CG4696-PB	0
gi|17136432,gi|62471647	CG10360-PA,CG10360-PB	0
gi|17136518,gi|24639112,gi|45551198	CG14792-PA,CG14792-PB,CG14792-PD	0
gi|17136564,gi|17737821,gi|24644849	CG1913-PA,CG2512-PA,CG2512-PB	0
gi|17136570,gi|17136574,gi|24640086,gi|24657014,gi|24657019,gi|45552935	CG2960-PA,CG5271-PA,CG11624-PA,CG11624-PB,CG11624-PC,CG32744-PA	0
gi|17136622,gi|17136624	CG12749-PA,CG12749-PB	0
gi|17136632,gi|19550069,gi|85724932	CG6647-PA,CG6647-PB,CG6647-PC	0
gi|17136664,gi|24762445,gi|24762447,gi|24762449,gi|24762451,gi|24762453,gi|24762455,gi|24762457	CG3725-PA,CG3725-PB,CG3725-PC,CG3725-PD,CG3725-PE,CG3725-PF,CG3725-PG,CG3725-PH	0
gi|17136738,gi|24655667,gi|24655672,gi|24655677,gi|24655685	CG9325-PA,CG9325-PB,CG9325-PD,CG9325-PE,CG9325-PF	0
gi|17136832,gi|85724904	CG13389-PA,CG13389-PB	0
gi|17136840,gi|17136842,gi|24584588,gi|45552397	CG5848-PA,CG5848-PB,CG5848-PC,CG5848-PD	0
gi|17136944,gi|24583206	CG4758-PA,CG4758-PB	0
gi|17137212,gi|17137214,gi|24582331,gi|62471615,gi|62471617	CG9261-PA,CG9261-PC,CG9261-PD,CG9261-PE,CG9261-PF	0
gi|17137316,gi|24645105,gi|24645108	CG9741-PA,CG9741-PB,CG9741-PC	0
gi|17137360,gi|24653270	CG3991-PA,CG3991-PD	0
gi|17137370,gi|24645718,gi|45551871,gi|62472483	CG4067-PA,CG4067-PB,CG4067-PC,CG4067-PD	0
gi|17137392,gi|19549828,gi|24654128,gi|28573773	CG8048-PA,CG8048-PB,CG8048-PC,CG8048-PD	0
gi|17137488,gi|17137490	CG1099-PA,CG1099-PB	0
gi|17137562,gi|24581283,gi|24581286,gi|24581288	CG3059-PA,CG3059-PB,CG3059-PC,CG3059-PD	0
gi|17137600,gi|24638934,gi|24638936,gi|24638938,gi|24638940,gi|24638942,gi|24638944,gi|85724772	CG16983-PA,CG16983-PB,CG16983-PC,CG16983-PD,CG16983-PE,CG16983-PF,CG16983-PG,CG16983-PH	0
gi|17137654,gi|24580914,gi|24580916,gi|24580918,gi|24580920	CG17654-PA,CG17654-PB,CG17654-PC,CG17654-PD,CG17654-PE	0
gi|17352457,gi|24657035	CG9847-PA,CG9847-PB	0
gi|17352465,gi|17352467,gi|17352469,gi|17352471	CG10844-PA,CG10844-PB,CG10844-PC,CG10844-PD	0
gi|17530805,gi|24639997,gi|62473515,gi|62473526	CG4027-PA,CG4027-PB,CG4027-PC,CG4027-PD	0
gi|17530861,gi|24640619,gi|45554534	CG1634-PA,CG1634-PB,CG1634-PC	0
gi|17530867,gi|17647507,gi|24585677,gi|24640743,gi|28571378,gi|78706960,gi|78706968,gi|78706978,gi|78706986,gi|78706996,gi|78707006,gi|78707016,gi|78707026,gi|78707036,gi|78707046,gi|78707056,gi|78707066,gi|78707076,gi|78707086,gi|78707096,gi|78707106,gi|78707116,gi|78707126,gi|78707136,gi|78707146,gi|78707156,gi|78707164	CG5825-PA,CG8989-PA,CG8989-PB,CG8989-PC,CG31613-PA,CG33803-PA,CG33806-PA,CG33809-PA,CG33812-PA,CG33815-PA,CG33818-PA,CG33821-PA,CG33824-PA,CG33827-PA,CG33830-PA,CG33833-PA,CG33836-PA,CG33839-PA,CG33842-PA,CG33845-PA,CG33848-PA,CG33851-PA,CG33854-PA,CG33857-PA,CG33860-PA,CG33863-PA,CG33866-PA	0
gi|17647141,gi|24663208	CG17146-PA,CG17146-PB	0
gi|17647175,gi|24654024,gi|24654027,gi|28573452	CG8421-PA,CG8421-PB,CG8421-PD,CG8421-PE	0
gi|17647337,gi|62472128,gi|62472140	CG4665-PA,CG4665-PB,CG4665-PC	0
gi|17647501,gi|24657468,gi|24657474	CG1318-PA,CG1318-PB,CG1318-PD	0
gi|17647809,gi|24652337,gi|28573326	CG4001-PA,CG4001-PB,CG4001-PC	0
gi|17647879,gi|85724916	CG4651-PA,CG4651-PB	0
gi|17647971,gi|24652377	CG12210-PA,CG12210-PB	0
gi|17736989,gi|24642523	CG9968-PA,CG9968-PB	0
gi|17737623,gi|24666468,gi|45551633	CG3979-PA,CG3979-PB,CG3979-PC	0
gi|17737907,gi|24645877,gi|24645879	CG4863-PA,CG4863-PB,CG4863-PE	0
gi|17737923,gi|85725204	CG10045-PA,CG10045-PB	0
gi|17738065,gi|24648444	CG4217-PA,CG4217-PB	0
gi|17864106,gi|24651273,gi|24651276	CG7939-PA,CG7939-PB,CG7939-PC	0
gi|17864128,gi|28571996	CG12070-PA,CG12070-PB	0
gi|17864160,gi|24651799	CG1483-PA,CG1483-PB	0
gi|17864256,gi|24642319	CG9032-PA,CG9032-PB	0
gi|17864468,gi|24661542,gi|24661546,gi|24661553,gi|24661557,gi|24661561,gi|24661565	CG4035-PA,CG4035-PB,CG4035-PC,CG4035-PD,CG4035-PE,CG4035-PF,CG4035-PG	0
gi|17864514,gi|45553181	CG6143-PB,CG6143-PC	0
gi|17864600,gi|24651231	CG7899-PA,CG7899-PB	0
gi|17933550,gi|24639550,gi|24639552	CG2849-PA,CG2849-PB,CG2849-PC	0
gi|17933556,gi|24639637,gi|24639639	CG3665-PA,CG3665-PB,CG3665-PC	0
gi|17933716,gi|24656661,gi|24656670,gi|24656675,gi|24656680,gi|24656685	CG9364-PA,CG9364-PB,CG9364-PC,CG9364-PD,CG9364-PE,CG9364-PF	0
gi|17933732,gi|17933740	CG5650-PA,CG9156-PA	0
gi|17975518,gi|24652434,gi|24652436	CG11765-PA,CG12405-PA,CG12896-PA	0
gi|17975542,gi|24585675,gi|24646873,gi|24646875,gi|78706958,gi|78706966,gi|78706976,gi|78706984,gi|78706994,gi|78707004,gi|78707014,gi|78707024,gi|78707034,gi|78707044,gi|78707054,gi|78707064,gi|78707074,gi|78707084,gi|78707124,gi|78707134,gi|78707144	CG3379-PA,CG3379-PB,CG3379-PC,CG31611-PA,CG33871-PA,CG33873-PA,CG33875-PA,CG33883-PA,CG33885-PA,CG33887-PA,CG33889-PA,CG33891-PA,CG33893-PA,CG33895-PA,CG33897-PA,CG33899-PA,CG33901-PA,CG33903-PA,CG33905-PA,CG33907-PA,CG33909-PA	0
gi|18543325,gi|45554137,gi|45554146,gi|45554154	CG5014-PA,CG5014-PB,CG5014-PC,CG5014-PD	0
gi|18858175,gi|28571140	CG7033-PA,CG7033-PC	0
gi|18860011,gi|24642439,gi|24642441,gi|24642443	CG9911-PA,CG9911-PB,CG9911-PC,CG9911-PD	0
gi|18860103,gi|24641469,gi|24641471,gi|45551448	CG1803-PA,CG1803-PB,CG1803-PC,CG1803-PD	0
gi|19921046,gi|24583273	CG4912-PA,CG4912-PB	0
gi|19921562,gi|45550998	CG31692-PA,CG31692-PB	0
gi|19921938,gi|24652180	CG1648-PA,CG1648-PB	0
gi|19921944,gi|24652210,gi|24652212,gi|24652214,gi|24652216,gi|24652218,gi|24652220,gi|24652222,gi|24652224	CG1516-PA,CG1516-PB,CG1516-PD,CG1516-PE,CG1516-PG,CG1516-PI,CG1516-PJ,CG1516-PK,CG1516-PL	0
gi|19922168,gi|24653364	CG18278-PA,CG30059-PA	0
gi|19922232,gi|24653584	CG8479-PA,CG8479-PB	0
gi|19922362,gi|24654046	CG8430-PA,CG8430-PB	0
gi|19922390,gi|24654191	CG8332-PA,CG8332-PB	0
gi|19922450,gi|24654434,gi|24654437,gi|24654439,gi|45552699	CG4847-PA,CG4847-PB,CG4847-PC,CG4847-PD,CG4847-PE	0
gi|19922582,gi|24655438,gi|62471735	CG15117-PA,CG15117-PB,CG15117-PC	0
gi|19922660	CG9350-PA	0
gi|19922796,gi|24659015,gi|24659021,gi|24659033	CG3082-PA,CG3082-PB,CG3082-PC,CG3082-PD	0
gi|20129467,gi|24583865	CG17218-PA,CG17218-PB	0
gi|20130305,gi|24762344,gi|24762346,gi|24762348	CG4019-PA,CG4019-PB,CG4019-PC,CG4019-PD	0
gi|21355283,gi|24661700	CG3424-PA,CG3424-PC	0
gi|21355813,gi|24648946,gi|24648948,gi|24648950,gi|45553457	CG7073-PA,CG7073-PB,CG7073-PC,CG7073-PD,CG7073-PE	0
gi|21356031,gi|24665611,gi|45553163,gi|45553165	CG32171-PB,CG32171-PD,CG32171-PG,CG32171-PH	0
gi|21356335,gi|24667703,gi|24667711	CG4365-PA,CG4365-PB,CG4365-PC	0
gi|21356421,gi|24645907	CG17734-PA,CG17734-PB	0
gi|21356527,gi|24663783	CG10724-PA,CG10724-PB	0
gi|21356561,gi|24660849,gi|24660856,gi|24660860,gi|24660864,gi|24660868,gi|28574947	CG7176-PA,CG7176-PB,CG7176-PC,CG7176-PD,CG7176-PE,CG7176-PF,CG7176-PG	0
gi|21356737,gi|62472918,gi|62472926,gi|62472936	CG4685-PA,CG4685-PB,CG4685-PC,CG4685-PD	0
gi|21356883,gi|24656767,gi|24656772,gi|24656777	CG12013-PA,CG12013-PB,CG12013-PC,CG12013-PD	0
gi|21356905,gi|24644238	CG12162-PA,CG12162-PB	0
gi|21356979,gi|24651731,gi|24651733,gi|24651735	CG1910-PA,CG1910-PB,CG1910-PC,CG1910-PD	0
gi|21357069,gi|45553345	CG11466-PA,CG11466-PB	0
gi|21357161,gi|24651668	CG11522-PA,CG11522-PB	0
gi|21357265,gi|24646345	CG6359-PA,CG6359-PB	0
gi|21357329,gi|45551810	CG9391-PA,CG9391-PB	0
gi|21357363,gi|45551638	CG15881-PA,CG15881-PB	0
gi|21358099,gi|45552333	CG5442-PA,CG5442-PB	0
gi|21358171,gi|24650956,gi|24650959,gi|24650961,gi|24650963,gi|24650965,gi|24650967	CG1709-PA,CG1709-PB,CG1709-PC,CG1709-PD,CG1709-PE,CG1709-PF,CG1709-PG	0
gi|21358209,gi|24655937,gi|24655942,gi|45552873	CG1275-PA,CG1275-PB,CG1275-PC,CG1275-PD	0
gi|21358545,gi|24641085	CG12334-PA,CG32672-PA	0
gi|21358555,gi|24647739,gi|24647741,gi|24647743,gi|24647745,gi|45553397	CG18212-PA,CG18212-PB,CG18212-PD,CG18212-PE,CG18212-PF,CG18212-PG	0
gi|22023983,gi|85725000	CG12055-PA,CG12055-PB	0
gi|22026970,gi|24586634,gi|24586636,gi|62471679,gi|62471681,gi|62471683,gi|62471685,gi|62471687,gi|62471689	CG8732-PA,CG8732-PB,CG8732-PC,CG8732-PD,CG8732-PE,CG8732-PF,CG8732-PG,CG8732-PH,CG8732-PI	0
gi|24580553,gi|24580555,gi|85724864,gi|85816269	CG3164-PA,CG3164-PB,CG3164-PC,CG3164-PD	0
gi|24581010,gi|78706832	CG7254-PA,CG7254-PB	0
gi|24581020,gi|28573993	CG7263-PA,CG7263-PB	0
gi|24581222,gi|28574010	CG2862-PA,CG2862-PB	0
gi|24583894,gi|24583896,gi|45552331	CG31764-PA,CG31764-PB,CG31764-PC	0
gi|24583969,gi|45550972,gi|45552335,gi|45552337,gi|45552339,gi|45552341,gi|45552343,gi|45552345,gi|45552347,gi|45552349,gi|45552351,gi|45552353,gi|45552355,gi|45552357,gi|45552359,gi|45552361,gi|45552363	CG6214-PA,CG6214-PB,CG6214-PC,CG6214-PD,CG6214-PE,CG6214-PF,CG6214-PG,CG6214-PH,CG6214-PI,CG6214-PJ,CG6214-PK,CG6214-PL,CG6214-PM,CG6214-PN,CG6214-PO,CG6214-PP,CG6214-PQ	0
gi|24584671,gi|24584673,gi|24584675	CG17332-PA,CG17332-PB,CG17332-PD	0
gi|24584704,gi|28574239	CG17927-PA,CG17927-PH	0
gi|24585186,gi|24585188,gi|28574364	CG17549-PA,CG17549-PB,CG17549-PC	0
gi|24585199,gi|24585203,gi|24585205,gi|85724960,gi|85816101	CG31794-PA,CG31794-PB,CG31794-PC,CG31794-PF,CG31794-PG	0
gi|24585438,gi|56302683	CG18858-PA,CG31683-PA	0
gi|24585514,gi|28574282,gi|28574284,gi|45551003,gi|45552429	CG9331-PA,CG9331-PB,CG9331-PC,CG9331-PD,CG9331-PE	0
gi|24585669,gi|78706962,gi|78706970,gi|78706980,gi|78706988,gi|78706998,gi|78707008,gi|78707018,gi|78707028,gi|78707038,gi|78707048,gi|78707068,gi|78707078,gi|78707088,gi|78707098,gi|78707108,gi|78707118,gi|78707128,gi|78707138,gi|78707148,gi|78707158	CG31617-PA,CG33804-PA,CG33807-PA,CG33810-PA,CG33813-PA,CG33816-PA,CG33819-PA,CG33822-PA,CG33825-PA,CG33828-PA,CG33831-PA,CG33837-PA,CG33840-PA,CG33843-PA,CG33846-PA,CG33849-PA,CG33852-PA,CG33855-PA,CG33858-PA,CG33861-PA,CG33864-PA	0
gi|24585671,gi|78706956,gi|78706964,gi|78706972,gi|78706982,gi|78706990,gi|78707000,gi|78707010,gi|78707020,gi|78707030,gi|78707040,gi|78707050,gi|78707060,gi|78707070,gi|78707080,gi|78707090,gi|78707100,gi|78707110,gi|78707120,gi|78707130,gi|78707140,gi|78707150,gi|78707160	CG17949-PA,CG33868-PA,CG33870-PA,CG33872-PA,CG33874-PA,CG33876-PA,CG33878-PA,CG33880-PA,CG33882-PA,CG33884-PA,CG33886-PA,CG33888-PA,CG33890-PA,CG33892-PA,CG33894-PA,CG33896-PA,CG33898-PA,CG33900-PA,CG33902-PA,CG33904-PA,CG33906-PA,CG33908-PA,CG33910-PA	0
gi|24586104,gi|24586105,gi|24586107,gi|45552463,gi|45552465,gi|45552467,gi|45552469,gi|45552471,gi|45552473,gi|45552475,gi|45552477	CG9453-PA,CG9453-PB,CG9453-PC,CG9453-PD,CG9453-PE,CG9453-PF,CG9453-PG,CG9453-PH,CG9453-PI,CG9453-PJ,CG9453-PK	0
gi|24586176,gi|78707176	CG1865-PA,CG1865-PB	0
gi|24586250,gi|24586252,gi|24586254,gi|24586256,gi|24586258,gi|45551030,gi|45551031,gi|45552499	CG11140-PA,CG11140-PB,CG11140-PC,CG11140-PD,CG11140-PE,CG11140-PF,CG11140-PG,CG11140-PI	0
gi|24586291,gi|24586293	CG2140-PA,CG2140-PB	0
gi|24638571,gi|24638575	CG1674-PA,CG1674-PB	0
gi|24638772,gi|62473187,gi|62484414,gi|62484416	CG18069-PB,CG18069-PD,CG18069-PE,CG18069-PG	0
gi|24638876,gi|24638878	CG17896-PA,CG17896-PB	0
gi|24639740,gi|24639744,gi|28571106	CG7010-PA,CG7010-PC,CG7010-PD	0
gi|24640124,gi|24640126	CG3861-PA,CG3861-PB	0
gi|24640175,gi|78706494	CG3192-PA,CG3192-PB	0
gi|24640177,gi|24640179	CG4094-PA,CG4094-PB	0
gi|24640549,gi|24640551,gi|24640553	CG2151-PA,CG2151-PB,CG2151-PC	0
gi|24641709,gi|24641711	CG1771-PA,CG1771-PB	0
gi|24641760,gi|24641764,gi|24641766,gi|24641768,gi|24641770,gi|45551451	CG1640-PA,CG1640-PB,CG1640-PC,CG1640-PD,CG1640-PE,CG1640-PF	0
gi|24643014,gi|24643016,gi|45555982,gi|45555989,gi|45555998	CG32549-PA,CG32549-PB,CG32549-PD,CG32549-PE,CG32549-PF	0
gi|24643268,gi|24643270	CG12233-PA,CG12233-PB	0
gi|24643375,gi|24643377,gi|24643379	CG14235-PA,CG14235-PB,CG14235-PC	0
gi|24643715,gi|24643717,gi|24643719,gi|24643721,gi|45556158,gi|45556169,gi|45556180	CG1417-PA,CG1417-PB,CG1417-PD,CG1417-PE,CG1417-PF,CG1417-PG,CG1417-PH	0
gi|24644153,gi|24644155	CG12163-PA,CG12163-PB	0
gi|24645047,gi|24645049	CG7415-PB,CG7415-PC	0
gi|24645119,gi|45550715,gi|45551847	CG8036-PB,CG8036-PC,CG8036-PD	0
gi|24645339,gi|24645341,gi|24650253,gi|24650255	CG6090-PA,CG6090-PB,CG9354-PA,CG9354-PB	0
gi|24645515,gi|24645517	CG8495-PA,CG8495-PC	0
gi|24646161,gi|24646163,gi|28573037,gi|28573039,gi|28573041,gi|28573043,gi|28573045,gi|28573047,gi|28573049,gi|28573051,gi|28573053,gi|28573055,gi|28573057,gi|28573059,gi|28573061	CG3359-PB,CG3359-PC,CG3359-PD,CG3359-PE,CG3359-PF,CG3359-PG,CG3359-PH,CG3359-PI,CG3359-PJ,CG3359-PK,CG3359-PL,CG3359-PM,CG3359-PN,CG3359-PO,CG3359-PP	0
gi|24646379,gi|24646381	CG6148-PA,CG6148-PB	0
gi|24646386,gi|24646388	CG10120-PA,CG10120-PB	0
gi|24646410,gi|24646412	CG7340-PA,CG7340-PC	0
gi|24646605,gi|24646607,gi|24646609	CG16901-PA,CG16901-PB,CG16901-PC	0
gi|24647046,gi|24647048	CG6476-PB,CG6476-PC	0
gi|24647376,gi|85725234	CG4337-PA,CG4337-PB	0
gi|24647557,gi|24647563	CG3678-PA,CG17556-PA	0
gi|24647885,gi|24647887,gi|24647889,gi|24647891	CG31196-PA,CG31196-PB,CG31196-PC,CG31196-PD	0
gi|24647946,gi|24647948,gi|45553409	CG7675-PA,CG7675-PB,CG7675-PC	0
gi|24648138,gi|24648140,gi|78706780,gi|78706782	CG11779-PA,CG11779-PB,CG11779-PC,CG11779-PD	0
gi|24648289,gi|24648291	CG4538-PA,CG4538-PB	0
gi|24648576,gi|24648578,gi|24648580,gi|45553435,gi|45553437,gi|45553439,gi|45553441	CG5670-PA,CG5670-PB,CG5670-PC,CG5670-PE,CG5670-PF,CG5670-PG,CG5670-PH	0
gi|24648964,gi|28571814	CG7070-PA,CG7070-PB	0
gi|24649614,gi|45549229,gi|62472788,gi|62472797,gi|62472805,gi|62472813	CG5695-PA,CG5695-PB,CG5695-PC,CG5695-PD,CG5695-PE,CG5695-PF	0
gi|24649705,gi|45552026	CG6643-PA,CG6643-PB	0
gi|24650276,gi|24650278,gi|24650280,gi|24650282,gi|24650288,gi|45551983,gi|45551985,gi|45553577	CG6058-PA,CG6058-PB,CG6058-PC,CG6058-PD,CG6058-PE,CG6058-PF,CG6058-PG,CG6058-PH	0
gi|24650981,gi|85725270,gi|85725272	CG1721-PA,CG1721-PB,CG1721-PC	0
gi|24651387,gi|24651389,gi|24651391,gi|45552009	CG2139-PA,CG2139-PB,CG2139-PC,CG2139-PD	0
gi|24651757,gi|24651759	CG2118-PA,CG2118-PB	0
gi|24652117,gi|45550393,gi|45551045	CG1814-PA,CG1814-PB,CG1814-PC	0
gi|24652135,gi|28573318	CG1827-PA,CG1827-PB	0
gi|24652322,gi|24652324,gi|62471695	CG17870-PD,CG17870-PE,CG17870-PJ	0
gi|24652408,gi|45552547	CG12908-PA,CG12908-PB	0
gi|24652446,gi|24652448,gi|24652450,gi|28573331,gi|28573333,gi|28573335,gi|28573337,gi|45552557,gi|45552559	CG2204-PA,CG2204-PB,CG2204-PC,CG2204-PD,CG2204-PE,CG2204-PF,CG2204-PG,CG2204-PH,CG2204-PI	0
gi|24653393,gi|24653395	CG6016-PA,CG6016-PB	0
gi|24653514,gi|24653516,gi|24653518	CG6692-PA,CG6692-PB,CG6692-PC	0
gi|24653772,gi|45552629	CG7639-PA,CG7639-PB	0
gi|24654037,gi|24654039	CG8428-PA,CG8428-PC	0
gi|24654347,gi|24654349,gi|24654351	CG8938-PA,CG8938-PB,CG8938-PC	0
gi|24655017,gi|24655026,gi|24655036	CG5174-PA,CG5174-PB,CG5174-PJ	0
gi|24655485,gi|24655490,gi|24655495,gi|24655499,gi|62471741	CG10737-PA,CG10737-PB,CG10737-PC,CG10737-PD,CG10737-PE	0
gi|24657376,gi|45549192,gi|45551513	CG15009-PA,CG15009-PB,CG15009-PC	0
gi|24659598,gi|24659604	CG10078-PA,CG10078-PB	0
gi|24661140,gi|24661144	CG32030-PA,CG32030-PB	0
gi|24661336,gi|24661340	CG32031-PA,CG32031-PB	0
gi|24661884,gi|24661888	CG8189-PA,CG8189-PB	0
gi|24662781,gi|24662785	CG6084-PA,CG6084-PB	0
gi|24662825,gi|45553059	CG7334-PA,CG7334-PB	0
gi|24663275,gi|24663279,gi|45553079	CG32103-PA,CG32103-PB,CG32103-PC	0
gi|24663511,gi|24663515,gi|24663519	CG10960-PA,CG10960-PB,CG10960-PC	0
gi|24664081,gi|24664085	CG17285-PA,CG17285-PB	0
gi|24665814,gi|28574878	CG6512-PA,CG6512-PB	0
gi|24666867,gi|24666871	CG8798-PA,CG8798-PB	0
gi|24667132,gi|28574619	CG7646-PA,CG7646-PB	0
gi|24762673,gi|28571872	CG11785-PA,CG12252-PA	0
gi|24762808,gi|24762812,gi|45551165	CG2727-PA,CG2727-PB,CG2727-PC	0
gi|24762816,gi|24762818,gi|62471805,gi|62471820	CG15792-PA,CG15792-PB,CG15792-PC,CG15792-PD	0
gi|28558739,gi|45552153	CG32019-PA,CG32019-PD	0
gi|28571689,gi|28571691,gi|28571693,gi|28571695,gi|28571697,gi|28571699	CG10851-PA,CG10851-PB,CG10851-PC,CG10851-PD,CG10851-PE,CG10851-PF	0
gi|28571703,gi|28571705	CG9297-PA,CG9297-PB	0
gi|28571729,gi|28571730	CG5044-PA,CG5044-PB	0
gi|28574366,gi|45552074	CG33171-PC,CG33171-PE	0
gi|28574516,gi|28574518,gi|28574520,gi|28574522	CG33129-PA,CG33129-PB,CG33129-PC,CG33129-PE	0
gi|28574818,gi|45552169	CG4260-PA,CG4260-PB	0
gi|28574882,gi|62484462	CG3849-PA,CG3849-PB	0
gi|28574889,gi|62472216	CG4609-PA,CG4609-PC	0
gi|45550489,gi|45551149	CG5625-PA,CG5625-PB	0
gi|45550802,gi|45551956	CG10374-PA,CG10374-PC	0
gi|45552080,gi|45552082,gi|45552084,gi|45552086,gi|45552088,gi|45552090,gi|85725114,gi|85725116	CG33205-PA,CG33205-PB,CG33205-PC,CG33205-PE,CG33205-PF,CG33205-PG,CG33205-PH,CG33205-PI	0
gi|45552181,gi|45552183	CG3539-PC,CG3539-PD	0
gi|45553391,gi|62484180	CG3937-PA,CG3937-PD	0
gi|62473099,gi|62473111,gi|62473120,gi|62484399,gi|62484401	CG2165-PA,CG2165-PB,CG2165-PC,CG2165-PD,CG2165-PE	0
gi|62484278,gi|62484452	CG4347-PA,CG4347-PC	0
gi|62484308,gi|62484485,gi|62484487	CG5077-PA,CG5077-PB,CG5077-PC	0
gi|62484318,gi|62484495	CG4673-PA,CG4673-PB	0
gi|116007256	CG13865-PA	1
gi|116007488	CG18001-PA	1
gi|116008436,gi|116008514	CG17521-PA,CG17521-PB	1
gi|161076204	CG41128-PA	1
gi|161076367	CG2093-PA	1
gi|161077703	CG2979-PA	1
gi|161080703	CG1915-PC	1
gi|161081372	CG15007-PA	1
gi|161082602	CG14181-PA	1
gi|17136192	CG6438-PA	1
gi|17136208,gi|24580558	CG2718-PB,CG2718-PC	1
gi|17136226	CG10160-PA	1
gi|17136240	CG7765-PA	1
gi|17136248,gi|24582075,gi|24582078,gi|24582080	CG9075-PA,CG9075-PB,CG9075-PC,CG9075-PD	1
gi|17136276	CG3821-PA	1
gi|17136288	CG9579-PA	1
gi|17136290	CG6944-PA	1
gi|17136292	CG10236-PA	1
gi|17136294,gi|24582614	CG7123-PA,CG7123-PB	1
gi|17136306	CG4178-PA	1
gi|17136318,gi|24638917,gi|24638919,gi|24638921	CG7622-PA,CG7622-PB,CG7622-PC,CG7622-PD	1
gi|17136320	CG4087-PA	1
gi|17136322,gi|45552831	CG2746-PA,CG2746-PB	1
gi|17136324	CG6779-PA	1
gi|17136340	CG5596-PB	1
gi|17136378,gi|24654793,gi|24654797,gi|24654800,gi|24654804,gi|24654807,gi|24654810,gi|45552715	CG5119-PA,CG5119-PB,CG5119-PC,CG5119-PD,CG5119-PE,CG5119-PF,CG5119-PG,CG5119-PH	1
gi|17136394	CG3127-PA	1
gi|17136420	CG9327-PA	1
gi|17136430	CG9375-PA	1
gi|17136470	CG3722-PA	1
gi|17136496	CG11793-PA	1
gi|17136504	CG1977-PA	1
gi|17136528,gi|24582735	CG8409-PA,CG8409-PB	1
gi|17136538	CG10223-PA	1
gi|17136612,gi|24586010,gi|24586012,gi|24586014	CG3161-PA,CG3161-PB,CG3161-PC,CG3161-PD	1
gi|17136620	CG7109-PA	1
gi|17136646	CG3299-PA	1
gi|17136698,gi|24653216	CG3644-PA,CG3644-PB	1
gi|17136706	CG1956-PA	1
gi|17136708,gi|24653398,gi|24653400,gi|24653402,gi|24653404,gi|24653406	CG6033-PA,CG6033-PB,CG6033-PC,CG6033-PD,CG6033-PE,CG6033-PF	1
gi|17136734	CG5920-PA	1
gi|17136796,gi|24646341	CG17369-PA,CG17369-PB	1
gi|17136806	CG5352-PA	1
gi|17136812	CG8905-PA	1
gi|17136856	CG2248-PA	1
gi|17136880	CG15442-PA	1
gi|17136882,gi|24656100	CG8900-PA,CG8900-PB	1
gi|17136884	CG10497-PA	1
gi|17136890	CG9073-PA	1
gi|17136892	CG8210-PA	1
gi|17136898,gi|24652801	CG8996-PA,CG8996-PB	1
gi|17136912	CG8764-PA	1
gi|17136934	CG9160-PA	1
gi|17136958,gi|19549898,gi|24582073,gi|45552225	CG9553-PA,CG9553-PB,CG9553-PC,CG9553-PD	1
gi|17136984	CG11527-PA	1
gi|17136986	CG4254-PA	1
gi|17137002	CG4038-PA	1
gi|17137026	CG7726-PA	1
gi|17137046,gi|24584585	CG5855-PA,CG5855-PB	1
gi|17137072	CG5210-PA	1
gi|17137088	CG3269-PA	1
gi|17137100,gi|19549710,gi|19549712,gi|24654021,gi|45552649,gi|45552651,gi|45552653	CG8416-PA,CG8416-PB,CG8416-PC,CG8416-PD,CG8416-PE,CG8416-PF,CG8416-PG	1
gi|17137106	CG3283-PA	1
gi|17137134,gi|24644746	CG1019-PA,CG1019-PB	1
gi|17137152	CG7434-PA	1
gi|17137186	CG13279-PA	1
gi|17137192	CG11567-PA	1
gi|17137194	CG3373-PA	1
gi|17137196,gi|28573456,gi|28573458,gi|28573460,gi|28573462,gi|45552655	CG8440-PA,CG8440-PB,CG8440-PC,CG8440-PD,CG8440-PE,CG8440-PF	1
gi|17137198,gi|24583602	CG6141-PA,CG6141-PB	1
gi|17137210	CG9258-PA	1
gi|17137216,gi|19549675	CG5771-PA,CG5771-PB	1
gi|17137228	CG17903-PA	1
gi|17137252	CG16858-PA	1
gi|17137260	CG4412-PA	1
gi|17137288,gi|24655642,gi|24655647	CG17246-PA,CG17246-PB,CG17246-PC	1
gi|17137300,gi|19549608,gi|24653200	CG8759-PA,CG8759-PB,CG8759-PC	1
gi|17137302,gi|24646112	CG14724-PA,CG14724-PB	1
gi|17137310,gi|45552187,gi|45552189,gi|45552191	CG3057-PA,CG3057-PB,CG3057-PC,CG3057-PD	1
gi|17137396	CG7111-PA	1
gi|17137450	CG10484-PA	1
gi|17137530	CG1982-PA	1
gi|17137546	CG8200-PA	1
gi|17137560	CG2331-PA	1
gi|17137568	CG4008-PA	1
gi|17137572,gi|24652838	CG8280-PA,CG8280-PB	1
gi|17137576	CG4882-PA	1
gi|17137578	CG4581-PA	1
gi|17137592	CG9677-PA	1
gi|17137602,gi|45552855	CG9148-PA,CG9148-PC	1
gi|17137620	CG3204-PA	1
gi|17137634	CG4494-PA	1
gi|17137668,gi|24583023,gi|24583025	CG3747-PA,CG3747-PB,CG3747-PC	1
gi|17137698	CG7013-PA	1
gi|17137758	CG4376-PC	1
gi|17137794,gi|24582896,gi|24582898	CG9280-PA,CG9280-PB,CG9280-PC	1
gi|17157991,gi|24641739	CG1633-PA,CG1633-PB	1
gi|17530801	CG3201-PA	1
gi|17530815	CG3595-PA	1
gi|17530825,gi|24640138,gi|24640142	CG3314-PA,CG3314-PC,CG3314-PD	1
gi|17530857	CG1478-PA	1
gi|17530859	CG11213-PA	1
gi|17530929	CG18319-PA	1
gi|17530957	CG8470-PA	1
gi|17647123	CG9707-PA	1
gi|17647135	CG10067-PA	1
gi|17647155	CG8604-PA	1
gi|17647183	CG12532-PA	1
gi|17647191	CG5870-PA	1
gi|17647231,gi|24652938	CG8472-PA,CG8472-PB	1
gi|17647249,gi|24643363	CG12530-PA,CG12530-PB	1
gi|17647277	CG6519-PA	1
gi|17647305	CG9438-PA	1
gi|17647355	CG17051-PA	1
gi|17647419	CG3763-PA	1
gi|17647425	CG9888-PA	1
gi|17647455,gi|24653107,gi|24653109,gi|24653111,gi|24653113,gi|24653115	CG17759-PA,CG17759-PB,CG17759-PC,CG17759-PE,CG17759-PG,CG17759-PH	1
gi|17647467,gi|24651901,gi|24651903,gi|24651905,gi|24651907	CG8261-PA,CG8261-PB,CG8261-PC,CG8261-PD,CG8261-PE	1
gi|17647469	CG9206-PA	1
gi|17647529	CG1242-PA	1
gi|17647581,gi|24659966,gi|24659971,gi|24659976,gi|24659981	CG8597-PA,CG8597-PB,CG8597-PC,CG8597-PD,CG8597-PE	1
gi|17647601	CG6821-PA	1
gi|17647639	CG14981-PA	1
gi|17647665	CG5479-PA	1
gi|17647667	CG11488-PA	1
gi|17647671	CG11258-PA	1
gi|17647675	CG1320-PA	1
gi|17647677	CG8849-PA	1
gi|17647685,gi|24585392	CG10757-PA,CG10757-PB	1
gi|17647689	CG2101-PA	1
gi|17647695	CG12921-PA	1
gi|17647699	CG5108-PA	1
gi|17647709,gi|24583459	CG7438-PA,CG7438-PB	1
gi|17647757,gi|24581262,gi|24581264,gi|24581267	CG2986-PA,CG2986-PB,CG2986-PC,CG2986-PD	1
gi|17647799	CG6988-PA	1
gi|17647849,gi|24654467,gi|45552705	CG4921-PA,CG4921-PB,CG4921-PC	1
gi|17647881	CG6253-PA	1
gi|17647883	CG3661-PA	1
gi|17647885	CG6510-PA	1
gi|17647887,gi|45552665	CG4918-PA,CG4918-PB	1
gi|17647889	CG3922-PB	1
gi|17647893,gi|24584963,gi|24584966	CG10305-PA,CG10305-PB,CG10305-PC	1
gi|17647897	CG8922-PA	1
gi|17648013,gi|24583090	CG31884-PA,CG31884-PB	1
gi|17648041	CG8882-PA	1
gi|17648065	CG12846-PA	1
gi|17648067	CG10106-PA	1
gi|17648083,gi|24661201,gi|24661205	CG4999-PA,CG4999-PB,CG4999-PC	1
gi|17648125	CG4600-PA	1
gi|17736973,gi|24581101,gi|24581103,gi|24581105,gi|24581107,gi|24581110	CG3664-PA,CG3664-PB,CG3664-PC,CG3664-PD,CG3664-PE,CG3664-PF	1
gi|17737290	CG10944-PB	1
gi|17737361	CG7113-PA	1
gi|17737369	CG17060-PA	1
gi|17737397	CG9159-PA	1
gi|17737405	CG4904-PA	1
gi|17737419,gi|24584391,gi|24584393,gi|24584395	CG4170-PA,CG4170-PB,CG4170-PC,CG4170-PD	1
gi|17737437	CG12840-PA	1
gi|17737445,gi|24651914,gi|24651916	CG8251-PA,CG8251-PB,CG8251-PC	1
gi|17737499	CG4533-PA	1
gi|17737513,gi|24654548,gi|24654552	CG6851-PA,CG6851-PB,CG6851-PC	1
gi|17737553	CG4463-PA	1
gi|17737557	CG3322-PA	1
gi|17737595	CG7350-PA	1
gi|17737605	CG4097-PA	1
gi|17737615,gi|45553183	CG5992-PA,CG5992-PB	1
gi|17737667	CG7445-PA	1
gi|17737681	CG6625-PA	1
gi|17737731	CG7490-PA	1
gi|17737759	CG1059-PA	1
gi|17737775,gi|24644298	CG1088-PA,CG1088-PB	1
gi|17737817	CG1112-PA	1
gi|17737875	CG9474-PA	1
gi|17737899,gi|24645822	CG6612-PA,CG6612-PB	1
gi|17737927	CG5266-PA	1
gi|17737941	CG7756-PA	1
gi|17737967,gi|24647034,gi|24647036,gi|24647038,gi|28571719,gi|28571721	CG4264-PA,CG4264-PB,CG4264-PC,CG4264-PD,CG4264-PE,CG4264-PF	1
gi|17737989,gi|24647276,gi|24647278,gi|24647280	CG9734-PA,CG9734-PB,CG9734-PC,CG9734-PD	1
gi|17738009	CG5184-PA	1
gi|17738015	CG5826-PA	1
gi|17738017	CG7596-PA	1
gi|17738043,gi|24648125	CG6030-PA,CG6030-PB	1
gi|17738047	CG5269-PA	1
gi|17738069	CG4204-PA	1
gi|17738077	CG15693-PA	1
gi|17738187	CG7748-PA	1
gi|17738195	CG6120-PA	1
gi|17738227	CG5499-PA	1
gi|17738283	CG7917-PA	1
gi|17864162	CG2168-PA	1
gi|17864182	CG11027-PA	1
gi|17864222	CG7962-PA	1
gi|17864264,gi|24585096	CG10652-PA,CG10652-PB	1
gi|17864292	CG9244-PB	1
gi|17864298	CG3949-PA	1
gi|17864306	CG3944-PA	1
gi|17864318,gi|24656124	CG1263-PA,CG1263-PB	1
gi|17864322	CG1448-PA	1
gi|17864338	CG5012-PA	1
gi|17864358	CG6050-PA	1
gi|17864394,gi|24581863	CG5827-PA,CG5827-PB	1
gi|17864452,gi|24762533,gi|24762535	CG3195-PA,CG3195-PB,CG3195-PC	1
gi|17864602,gi|24668859,gi|24668866	CG17520-PA,CG17520-PB,CG17520-PC	1
gi|17864676,gi|24656348	CG1274-PA,CG1274-PB	1
gi|17865652	CG7758-PA	1
gi|17865835	CG5915-PA	1
gi|17933498	CG3972-PA	1
gi|17933570	CG7038-PA	1
gi|17933574,gi|24639734,gi|24639736,gi|24639738	CG6998-PA,CG6998-PB,CG6998-PC,CG6998-PD	1
gi|17933586	CG1787-PA	1
gi|17933598,gi|24642327,gi|45555412,gi|45555420,gi|45555433,gi|45555444	CG10545-PA,CG10545-PB,CG10545-PC,CG10545-PD,CG10545-PE,CG10545-PF	1
gi|17933600,gi|18110149	CG8893-PA,CG8893-PB	1
gi|17933602	CG3422-PA	1
gi|17933648	CG4236-PA	1
gi|17933656,gi|24648886	CG6343-PA,CG6343-PB	1
gi|17933672	CG2184-PA	1
gi|17933722,gi|24651356,gi|24651358,gi|24651360	CG2216-PA,CG2216-PB,CG2216-PC,CG2216-PD	1
gi|17975540	CG7478-PA	1
gi|17975567,gi|24641743,gi|24641747,gi|24641750	CG2033-PA,CG2033-PC,CG2033-PD,CG2033-PE	1
gi|17975579,gi|17977696,gi|24640451	CG1524-PA,CG1524-PB,CG1527-PA	1
gi|17981717	CG6871-PA	1
gi|17986025	CG14413-PA	1
gi|17986137	CG6524-PA	1
gi|18079273,gi|24641095	CG16944-PA,CG16944-PB	1
gi|18543319	CG2934-PA	1
gi|18858005	CG12151-PA	1
gi|18858089	CG2968-PA	1
gi|18858095	CG2998-PA	1
gi|18858127	CG3446-PA	1
gi|18858897,gi|24640280	CG4590-PA,CG4590-PB	1
gi|18859687	CG11151-PA	1
gi|18859803	CG1837-PA	1
gi|18859837	CG3415-PA	1
gi|18859841,gi|24642505,gi|24642507	CG4239-PA,CG4239-PB,CG4239-PC	1
gi|18859875	CG5599-PA	1
gi|18859877	CG5703-PA	1
gi|18859915	CG7772-PA	1
gi|18859933	CG8231-PA	1
gi|18859969	CG9066-PA	1
gi|18859973	CG9099-PA	1
gi|18859983,gi|24642371	CG9172-PA,CG9172-PB	1
gi|18859993	CG9512-PA	1
gi|18860015	CG9921-PA	1
gi|18860017	CG9938-PA	1
gi|18860049,gi|24642395,gi|24642398	CG9212-PA,CG9212-PB,CG9212-PC	1
gi|18860055	CG1591-PA	1
gi|18860073	CG1660-PA	1
gi|18860083	CG3989-PA	1
gi|18860087	CG9946-PA	1
gi|18860517	CG7635-PA	1
gi|18860539	CG12203-PA	1
gi|18921099	CG7359-PA	1
gi|18921117,gi|24639275,gi|24639277	CG3835-PA,CG3835-PB,CG3835-PC	1
gi|18921123	CG3564-PA	1
gi|18921137,gi|24640202,gi|24640204,gi|24640206	CG3203-PA,CG3203-PB,CG3203-PC,CG3203-PD	1
gi|18921139	CG2233-PA	1
gi|18921171	CG10992-PA	1
gi|19549546	CG4475-PA	1
gi|19920344,gi|24643307	CG14206-PB,CG14206-PC	1
gi|19920346	CG14207-PA	1
gi|19920358	CG12235-PA	1
gi|19920382	CG9577-PA	1
gi|19920420	CG14613-PA	1
gi|19920458	CG11592-PA	1
gi|19920464	CG4164-PA	1
gi|19920474	CG2813-PA	1
gi|19920498	CG4764-PA	1
gi|19920502,gi|24580801	CG5080-PA,CG5080-PB	1
gi|19920632	CG3523-PA	1
gi|19920648	CG8843-PA	1
gi|19920676	CG4104-PA	1
gi|19920710	CG8885-PA	1
gi|19920720	CG3887-PA	1
gi|19920754	CG7382-PA	1
gi|19920760	CG7277-PA	1
gi|19920794	CG9140-PA	1
gi|19920826	CG9539-PA	1
gi|19920834	CG9547-PA	1
gi|19920922	CG8282-PA	1
gi|19920932,gi|24582786	CG14275-PA,CG14275-PB	1
gi|19920962	CG13091-PA	1
gi|19921016	CG5885-PA	1
gi|19921088	CG6206-PA	1
gi|19921098	CG6094-PA	1
gi|19921140	CG6287-PA	1
gi|19921166	CG6746-PA	1
gi|19921244	CG9306-PA	1
gi|19921254	CG9282-PA	1
gi|19921326	CG15293-PA	1
gi|19921348,gi|24584562	CG4993-PA,CG4993-PB	1
gi|19921376	CG15261-PA	1
gi|19921400	CG13240-PA	1
gi|19921430	CG4278-PA	1
gi|19921434	CG5809-PA	1
gi|19921464	CG6453-PA	1
gi|19921484	CG10413-PA	1
gi|19921504,gi|24585043,gi|24585045,gi|24585047	CG17322-PA,CG17322-PB,CG17322-PC,CG17322-PD	1
gi|19921506	CG17597-PA	1
gi|19921518	CG15168-PA	1
gi|19921566,gi|45552419	CG10664-PA,CG10664-PB	1
gi|19921700	CG3403-PA	1
gi|19921772	CG8728-PA	1
gi|19921806	CG2297-PA	1
gi|19921848	CG8258-PA	1
gi|19921864	CG8193-PA	1
gi|19921922,gi|24652126,gi|24652129	CG1821-PA,CG1821-PB,CG1821-PC	1
gi|19921940	CG1599-PA	1
gi|19921976	CG17765-PA	1
gi|19922002	CG7712-PA	1
gi|19922030	CG9035-PA	1
gi|19922066	CG8888-PA	1
gi|19922090,gi|24652981,gi|24652983,gi|24652985	CG8839-PA,CG8839-PC,CG8839-PD,CG8839-PE	1
gi|19922194,gi|24653465,gi|24653467,gi|28573416	CG6329-PA,CG6329-PB,CG6329-PC,CG6329-PD	1
gi|19922206,gi|24653513	CG13349-PA,CG13349-PB	1
gi|19922238	CG8531-PA	1
gi|19922382,gi|24654142	CG7997-PA,CG7997-PB	1
gi|19922422	CG6984-PA	1
gi|19922464	CG4954-PA	1
gi|19922486	CG6370-PA	1
gi|19922532	CG17530-PA	1
gi|19922556	CG5482-PA	1
gi|19922568,gi|24655230	CG15093-PA,CG15093-PB	1
gi|19922616	CG8654-PA	1
gi|19922626	CG11208-PA	1
gi|19922662	CG10540-PA	1
gi|19922680	CG4302-PA	1
gi|19922704	CG10306-PA	1
gi|19922746	CG4046-PA	1
gi|19922752	CG4207-PA	1
gi|19922774	CG3501-PA	1
gi|19922820	CG3906-PA	1
gi|19922878,gi|24762531	CG3186-PA,CG3186-PB	1
gi|19922902,gi|24762651,gi|24762654	CG4589-PA,CG4589-PB,CG4589-PC	1
gi|19922916,gi|24762682	CG4692-PA,CG4692-PB	1
gi|19922924	CG3663-PA	1
gi|19922932	CG16936-PA	1
gi|19922958	CG2736-PA	1
gi|19922964	CG2668-PA	1
gi|19923000	CG3200-PA	1
gi|19923024,gi|24654889	CG13887-PB,CG13887-PC	1
gi|19923034	CG9128-PA	1
gi|19923042,gi|24655107	CG9186-PA,CG9186-PB	1
gi|20128923	CG2918-PA	1
gi|20129007	CG1637-PC	1
gi|20129163	CG7291-PA	1
gi|20129235	CG3036-PA	1
gi|20129243	CG8680-PA	1
gi|20129279	CG11015-PA	1
gi|20129309	CG5177-PA	1
gi|20129315	CG5261-PB	1
gi|20129349	CG7380-PA	1
gi|20129377	CG13393-PA	1
gi|20129399	CG3752-PA	1
gi|20129425	CG5390-PA	1
gi|20129441	CG6415-PA	1
gi|20129463	CG12264-PA	1
gi|20129563	CG17331-PA	1
gi|20129625	CG15825-PB	1
gi|20129681,gi|24585591	CG9248-PA,CG9248-PB	1
gi|20129705	CG12775-PA	1
gi|20129819,gi|24652042	CG8029-PA,CG8029-PB	1
gi|20129845	CG12918-PA	1
gi|20129847	CG1371-PA	1
gi|20129861	CG12935-PA	1
gi|20129879	CG13220-PA	1
gi|20129901,gi|24652922	CG8857-PA,CG8857-PC	1
gi|20129927	CG12373-PA	1
gi|20129971,gi|24653477	CG6543-PA,CG6543-PB	1
gi|20130001	CG12859-PA	1
gi|20130037	CG8443-PA	1
gi|20130049	CG6251-PA	1
gi|20130085	CG6459-PA	1
gi|20130125	CG5323-PA	1
gi|20130139	CG15101-PA	1
gi|20130217	CG9862-PA	1
gi|20130247	CG3751-PA	1
gi|20130249	CG2852-PA	1
gi|20130301	CG17280-PA	1
gi|20130317	CG5554-PA	1
gi|20130319	CG5597-PA	1
gi|20130403	CG7008-PA	1
gi|20428641	CG8947-PA	1
gi|21355081	CG14813-PA	1
gi|21355083	CG1548-PA	1
gi|21355085	CG7891-PA	1
gi|21355095	CG7459-PA	1
gi|21355181	CG6178-PA	1
gi|21355207	CG5677-PA	1
gi|21355241	CG7603-PA	1
gi|21355243	CG7580-PA	1
gi|21355265	CG10640-PA	1
gi|21355319	CG10672-PA	1
gi|21355397	CG10157-PA	1
gi|21355477,gi|24644008,gi|24644010,gi|28573236	CG31523-PA,CG31523-PB,CG31523-PC,CG31523-PD	1
gi|21355515,gi|24649729	CG6668-PA,CG6668-PB	1
gi|21355551	CG8186-PA	1
gi|21355573,gi|24652553	CG12323-PA,CG12323-PB	1
gi|21355577,gi|24661285,gi|24661292	CG5288-PA,CG5288-PB,CG5288-PC	1
gi|21355629	CG11981-PA	1
gi|21355657	CG6126-PA	1
gi|21355751	CG6831-PA	1
gi|21355753	CG6638-PA	1
gi|21355779	CG6776-PA	1
gi|21355797	CG6983-PA	1
gi|21355865	CG9379-PA	1
gi|21355869	CG1259-PB	1
gi|21355871	CG1309-PA	1
gi|21355903	CG8199-PA	1
gi|21355917	CG14996-PB	1
gi|21355931	CG11915-PA	1
gi|21355963,gi|24654344	CG8946-PA,CG8946-PB	1
gi|21356029	CG11267-PA	1
gi|21356081,gi|24644140,gi|24644142	CG2604-PA,CG2604-PB,CG2604-PC	1
gi|21356111	CG11771-PA	1
gi|21356113	CG6773-PA	1
gi|21356159,gi|24641219	CG1404-PA,CG1404-PB	1
gi|21356165,gi|24581441	CG8844-PA,CG8844-PB	1
gi|21356183	CG5023-PA	1
gi|21356199	CG10130-PA	1
gi|21356279	CG5889-PA	1
gi|21356291	CG11857-PA	1
gi|21356303	CG11858-PA	1
gi|21356345	CG8042-PA	1
gi|21356361	CG6554-PA	1
gi|21356377	CG4703-PA	1
gi|21356389,gi|24648272,gi|24648275	CG4572-PA,CG4572-PB,CG4572-PC	1
gi|21356397,gi|24645815	CG6608-PA,CG6608-PB	1
gi|21356425	CG10863-PA	1
gi|21356433,gi|24667380,gi|24667384,gi|24667388,gi|24667392,gi|28574632	CG5605-PA,CG5605-PB,CG5605-PC,CG5605-PE,CG5605-PF,CG5605-PG	1
gi|21356475	CG9762-PA	1
gi|21356587	CG13397-PA	1
gi|21356629	CG14715-PA	1
gi|21356731	CG5112-PA	1
gi|21356733	CG5107-PA	1
gi|21356765	CG8602-PA	1
gi|21356773	CG6008-PA	1
gi|21356787	CG10007-PA	1
gi|21356859	CG7762-PA	1
gi|21356893	CG6092-PA	1
gi|21356927	CG2099-PA	1
gi|21357009	CG8615-PA	1
gi|21357011	CG8612-PA	1
gi|21357019,gi|24647955	CG18617-PA,CG18617-PB	1
gi|21357053	CG1475-PB	1
gi|21357105	CG2109-PA	1
gi|21357171	CG5844-PA	1
gi|21357209	CG4893-PA	1
gi|21357229	CG4157-PA	1
gi|21357257,gi|45553055,gi|45553057	CG18815-PA,CG18815-PB,CG18815-PC	1
gi|21357261,gi|24662862	CG7314-PA,CG7314-PB	1
gi|21357267	CG6014-PA	1
gi|21357311	CG2046-PA	1
gi|21357319	CG1100-PA	1
gi|21357415	CG8782-PA	1
gi|21357419	CG8031-PA	1
gi|21357437	CG6878-PA	1
gi|21357475,gi|24664044,gi|24664047	CG6603-PA,CG6603-PB,CG6603-PC	1
gi|21357525	CG9231-PA	1
gi|21357545,gi|24646533	CG8790-PA,CG8790-PB	1
gi|21357547,gi|24646556,gi|24646558,gi|24646560,gi|24646562	CG8863-PA,CG8863-PB,CG8863-PC,CG8863-PD,CG8863-PE	1
gi|21357549	CG7106-PA	1
gi|21357605,gi|24643746,gi|24643749,gi|24643751,gi|24643753	CG14476-PA,CG14476-PB,CG14476-PC,CG14476-PD,CG14476-PE	1
gi|21357643	CG7470-PA	1
gi|21357673	CG5590-PA	1
gi|21357739	CG5520-PA	1
gi|21357797	CG6803-PB	1
gi|21357853	CG6846-PA	1
gi|21357863	CG1893-PA	1
gi|21357875,gi|24646943	CG3731-PA,CG3731-PB	1
gi|21357897	CG16985-PA	1
gi|21357907	CG4225-PA	1
gi|21357927	CG5903-PA	1
gi|21358039	CG5642-PA	1
gi|21358065	CG8993-PA	1
gi|21358097	CG6987-PA	1
gi|21358141	CG1330-PA	1
gi|21358145,gi|24650940	CG11876-PA,CG11876-PD	1
gi|21358147	CG2358-PA	1
gi|21358149	CG2342-PA	1
gi|21358165	CG1715-PA	1
gi|21358201,gi|24646701,gi|24646703	CG9285-PA,CG9285-PB,CG9285-PC	1
gi|21358227	CG1458-PA	1
gi|21358239	CG11315-PA	1
gi|21358259	CG6151-PA	1
gi|21358265	CG13920-PA	1
gi|21358267	CG7970-PA	1
gi|21358399	CG15304-PA	1
gi|21358417	CG9034-PA	1
gi|21358457	CG1907-PA	1
gi|21358459,gi|24651337,gi|45553763	CG1883-PA,CG1883-PC,CG1883-PD	1
gi|21358499	CG7430-PA	1
gi|21358539	CG11051-PA	1
gi|21358587	CG5840-PA	1
gi|21358593,gi|24646815	CG3321-PA,CG3321-PB	1
gi|21358615	CG7920-PA	1
gi|21686985	CG30000-PA	1
gi|21687222	CG12954-PA	1
gi|22024069	CG2064-PA	1
gi|22024141	CG8415-PA	1
gi|22024201	CG30122-PB	1
gi|22026781	CG12845-PA	1
gi|22026816	CG3140-PA	1
gi|22026914	CG13506-PA	1
gi|23397395	CG7144-PA	1
gi|23397593	CG3156-PA	1
gi|23397609	CG3699-PA	1
gi|23397616	CG14787-PA	1
gi|24580896	CG7361-PB	1
gi|24581044	CG15386-PA	1
gi|24581083	CG17242-PA	1
gi|24581117	CG3609-PA	1
gi|24581165	CG3214-PA	1
gi|24581334	CG17259-PA	1
gi|24581345	CG3524-PA	1
gi|24581429	CG2774-PA	1
gi|24581820,gi|24581822,gi|24581824	CG4145-PA,CG4145-PB,CG4145-PC	1
gi|24581885	CG6514-PA	1
gi|24581914	CG14028-PA	1
gi|24582088	CG9092-PA	1
gi|24582499	CG5958-PA	1
gi|24582628	CG7104-PA	1
gi|24582631	CG18591-PA	1
gi|24582659	CG7356-PB	1
gi|24582681,gi|24582683,gi|24582685,gi|24582687,gi|24582689,gi|24582691,gi|24582693,gi|24582695	CG31605-PA,CG31605-PB,CG31605-PC,CG31605-PD,CG31605-PE,CG31605-PF,CG31605-PH,CG31605-PI	1
gi|24582722	CG8475-PA	1
gi|24582773	CG7830-PA	1
gi|24582811	CG13392-PA	1
gi|24582926	CG9465-PA	1
gi|24583049	CG4422-PA	1
gi|24583165	CG4598-PA	1
gi|24583248	CG4897-PA	1
gi|24583291	CG5676-PA	1
gi|24583394	CG5362-PA	1
gi|24583414	CG5355-PA	1
gi|24583427	CG5188-PA	1
gi|24583463,gi|24583465	CG7400-PA,CG7400-PB	1
gi|24583513	CG6750-PA	1
gi|24583760	CG16965-PA	1
gi|24583867	CG6579-PA	1
gi|24583944	CG5525-PA	1
gi|24583960	CG6180-PA	1
gi|24583984,gi|24583986,gi|24583988	CG3762-PA,CG3762-PB,CG3762-PC	1
gi|24584105	CG9302-PA	1
gi|24584213	CG31842-PA	1
gi|24584558	CG12455-PA	1
gi|24584700	CG17927-PF	1
gi|24584710	CG17927-PB	1
gi|24584712	CG17927-PK	1
gi|24584758	CG6115-PA	1
gi|24584816,gi|24584818	CG6794-PA,CG6794-PB	1
gi|24584826	CG6667-PC	1
gi|24584843	CG5131-PA	1
gi|24584970	CG10302-PA	1
gi|24585024	CG10373-PA	1
gi|24585081	CG10639-PA	1
gi|24585145,gi|24585147	CG10691-PA,CG10691-PB	1
gi|24585213	CG16771-PA	1
gi|24585265	CG10166-PA	1
gi|24585531	CG9336-PA	1
gi|24585535	CG9338-PA	1
gi|24585552	CG9342-PA	1
gi|24585589	CG9249-PA	1
gi|24585709	CG2238-PA	1
gi|24585801	CG2981-PA	1
gi|24585866	CG11665-PA	1
gi|24586016	CG3152-PA	1
gi|24586060	CG9432-PA	1
gi|24586065	CG3267-PA	1
gi|24586086,gi|24586088	CG3287-PB,CG3287-PC	1
gi|24586098,gi|24586100,gi|45552461	CG9446-PA,CG9446-PB,CG9446-PC	1
gi|24586111	CG9456-PA	1
gi|24586138,gi|24586140,gi|24586142	CG18817-PA,CG18817-PB,CG18817-PC	1
gi|24586303	CG30498-PA	1
gi|24586344	CG30493-PB	1
gi|24586400,gi|24586402,gi|24586406	CG18495-PA,CG18495-PB,CG30382-PA	1
gi|24586529	CG30373-PA	1
gi|24586593	CG30359-PA	1
gi|24638644	CG1970-PA	1
gi|24638766	CG11154-PA	1
gi|24638795	CG11064-PA	1
gi|24638958	CG5254-PA	1
gi|24638995,gi|24638997,gi|24638999	CG11642-PA,CG11642-PB,CG11642-PC	1
gi|24639192	CG14804-PA	1
gi|24639279	CG3724-PA	1
gi|24639292	CG3621-PA	1
gi|24639444	CG3603-PA	1
gi|24639450,gi|24639452	CG3653-PA,CG3653-PB	1
gi|24639915	CG3129-PA	1
gi|24640000	CG4020-PA	1
gi|24640005	CG3011-PA	1
gi|24640268	CG4586-PA	1
gi|24640397,gi|45554336	CG12157-PA,CG12157-PB	1
gi|24640423	CG10932-PA	1
gi|24640442	CG1444-PA	1
gi|24640486	CG1560-PA	1
gi|24640488	CG2253-PA	1
gi|24640492	CG2254-PA	1
gi|24640547	CG10964-PA	1
gi|24640557,gi|24640559	CG2286-PA,CG2286-PB	1
gi|24640652	CG12108-PA	1
gi|24640745	CG9022-PA	1
gi|24640838	CG32702-PA	1
gi|24640905,gi|24640907	CG1780-PA,CG1780-PB	1
gi|24641178	CG2081-PB	1
gi|24641180	CG2076-PA	1
gi|24641191,gi|24641193	CG12101-PA,CG12101-PB	1
gi|24641198	CG2522-PA	1
gi|24641313	CG1751-PA	1
gi|24641402,gi|24641404,gi|24641406,gi|24641408	CG4147-PA,CG4147-PB,CG4147-PC,CG4147-PD	1
gi|24641542	CG2559-PA	1
gi|24641679	CG32638-PA	1
gi|24641772	CG1987-PA	1
gi|24641813	CG7107-PA	1
gi|24641865	CG11129-PA	1
gi|24641946	CG15871-PA	1
gi|24642084	CG5548-PA	1
gi|24642107	CG9091-PA	1
gi|24642243	CG9245-PA	1
gi|24642404,gi|24642406	CG9216-PA,CG9216-PC	1
gi|24642430	CG3560-PA	1
gi|24642641	CG9623-PB	1
gi|24642955,gi|24642957	CG7178-PD,CG7178-PE	1
gi|24642959	CG7178-PB	1
gi|24642961	CG7178-PA	1
gi|24642963	CG7178-PG	1
gi|24643010	CG6186-PA	1
gi|24643142	CG7322-PA	1
gi|24643241	CG32531-PA	1
gi|24643312	CG14207-PB	1
gi|24643390	CG32528-PA	1
gi|24643394	CG12703-PA	1
gi|24643618	CG1742-PA	1
gi|24643765,gi|45551492,gi|45556188	CG32500-PA,CG32857-PA,CG33502-PA	1
gi|24644197	CG11999-PA	1
gi|24644339	CG31548-PA	1
gi|24644404,gi|24644406	CG10978-PA,CG10978-PB	1
gi|24644438	CG2023-PA	1
gi|24644446,gi|24644448,gi|24644450	CG1213-PA,CG1213-PB,CG1213-PC	1
gi|24644458	CG10610-PA	1
gi|24644479	CG10279-PA	1
gi|24644665	CG1307-PB	1
gi|24644712	CG1105-PA	1
gi|24644772	CG2520-PA	1
gi|24644940	CG2791-PA	1
gi|24644968	CG7910-PA	1
gi|24644981	CG18249-PA	1
gi|24645039	CG9603-PA	1
gi|24645087	CG31450-PA	1
gi|24645089	CG31460-PA	1
gi|24645179	CG8351-PA	1
gi|24645213	CG11967-PA	1
gi|24645384	CG9373-PA	1
gi|24645421,gi|24645423	CG9399-PA,CG9399-PB	1
gi|24645441	CG9429-PA	1
gi|24645538	CG16904-PA	1
gi|24645542	CG9458-PA	1
gi|24645604	CG3940-PA	1
gi|24645648	CG3999-PA	1
gi|24645661	CG12818-PA	1
gi|24645686	CG6342-PA	1
gi|24645757	CG6544-PC	1
gi|24645759	CG6544-PB	1
gi|24645861	CG4800-PA	1
gi|24645865,gi|24645867	CG6684-PA,CG6684-PB	1
gi|24645909	CG5214-PA	1
gi|24646114,gi|28573065,gi|28573067,gi|28573069	CG6950-PA,CG6950-PB,CG6950-PC,CG6950-PD	1
gi|24646169	CG3132-PA	1
gi|24646246	CG4115-PA	1
gi|24646278	CG5167-PA	1
gi|24646297,gi|24646299,gi|24646301,gi|24646303,gi|24646305	CG5887-PA,CG5887-PB,CG5887-PC,CG5887-PD,CG5887-PE	1
gi|24646553	CG32854-PA	1
gi|24646857	CG8066-PA	1
gi|24646910,gi|24646912	CG7390-PA,CG7390-PB	1
gi|24647054	CG4307-PA	1
gi|24647073,gi|24647075,gi|24647077	CG4898-PD,CG4898-PG,CG4898-PJ	1
gi|24647095,gi|28571726	CG4843-PA,CG4843-PB	1
gi|24647110	CG6226-PA	1
gi|24647146	CG5073-PA	1
gi|24647293	CG5268-PA	1
gi|24647318	CG4261-PA	1
gi|24647494	CG17560-PA	1
gi|24647510,gi|24647512	CG8977-PA,CG8977-PB	1
gi|24647665,gi|24647667	CG5413-PA,CG5413-PB	1
gi|24647735	CG7523-PA	1
gi|24647855	CG12321-PA	1
gi|24647881	CG7998-PA	1
gi|24648130	CG6042-PA	1
gi|24648277	CG4686-PA	1
gi|24648453	CG5434-PA	1
gi|24648516	CG31195-PA	1
gi|24648549,gi|24648551	CG15697-PA,CG15697-PB	1
gi|24648584,gi|24648586,gi|24648588	CG5685-PA,CG5685-PB,CG5685-PC	1
gi|24648682	CG3320-PA	1
gi|24648872	CG6439-PA	1
gi|24648987	CG13850-PA	1
gi|24649014,gi|28571823	CG7057-PA,CG7057-PB	1
gi|24649021	CG5377-PA	1
gi|24649148	CG4721-PA	1
gi|24649360	CG10161-PB	1
gi|24649395,gi|24649397	CG10230-PA,CG10230-PB	1
gi|24649631	CG31132-PA	1
gi|24649743	CG31126-PA	1
gi|24649745	CG5796-PA	1
gi|24649832	CG11089-PA	1
gi|24649877	CG11781-PA	1
gi|24649922	CG11920-PA	1
gi|24649976	CG10423-PA	1
gi|24650124	CG4759-PA	1
gi|24650557	CG31063-PA	1
gi|24650747	CG5502-PA	1
gi|24650776	CG4869-PA	1
gi|24650984	CG11888-PA	1
gi|24651001,gi|24651003	CG11901-PA,CG11901-PB	1
gi|24651098	CG7584-PA	1
gi|24651125,gi|24651127,gi|24651129	CG7610-PA,CG7610-PB,CG7610-PC	1
gi|24651145,gi|24651147	CG7834-PA,CG7834-PB	1
gi|24651181	CG7808-PC	1
gi|24651187,gi|24651189,gi|24651191,gi|24651193,gi|24651195,gi|24651197	CG7816-PA,CG7816-PC,CG7816-PD,CG7816-PE,CG7816-PF,CG7816-PG	1
gi|24651364,gi|24651366,gi|24651368	CG1469-PA,CG1469-PB,CG1469-PC	1
gi|24651373	CG9688-PA	1
gi|24651451	CG2241-PA	1
gi|24651498	CG11314-PA	1
gi|24651589	CG1544-PA	1
gi|24651794	CG2050-PA	1
gi|24652011	CG30344-PA	1
gi|24652204	CG1519-PA	1
gi|24652244	CG30008-PA	1
gi|24652256	CG12140-PA	1
gi|24652403	CG3298-PB	1
gi|24652463,gi|24652465	CG12891-PA,CG12891-PB	1
gi|24652557	CG12324-PA	1
gi|24652624	CG30021-PA	1
gi|24652684	CG13210-PA	1
gi|24652780	CG9006-PA	1
gi|24652913	CG8453-PA	1
gi|24653432	CG6155-PA	1
gi|24653497	CG18076-PH	1
gi|24653538	CG30483-PA	1
gi|24653560	CG8331-PA	1
gi|24653595	CG8542-PA	1
gi|24653598,gi|24653600	CG8547-PA,CG8547-PB	1
gi|24653618	CG12505-PA	1
gi|24653664	CG10119-PA	1
gi|24653737	CG10242-PA	1
gi|24653966	CG18255-PA	1
gi|24653986	CG8320-PA	1
gi|24653988,gi|24653990	CG8322-PA,CG8322-PB	1
gi|24653999	CG8392-PA	1
gi|24654162	CG4398-PA	1
gi|24654259	CG5550-PA	1
gi|24654389,gi|24654391	CG10938-PA,CG10938-PB	1
gi|24654512	CG30109-PA	1
gi|24654595	CG5009-PA	1
gi|24654665	CG13880-PA	1
gi|24654903	CG13890-PA	1
gi|24654975	CG17524-PA	1
gi|24655003,gi|24655007,gi|24655011,gi|24655014,gi|45552721,gi|45552723	CG5170-PA,CG5170-PB,CG5170-PC,CG5170-PD,CG5170-PE,CG5170-PF	1
gi|24655082	CG10924-PA	1
gi|24655327	CG15102-PA	1
gi|24655502	CG7977-PA	1
gi|24655527	CG11949-PA	1
gi|24655555,gi|24655560,gi|24655565,gi|24655570,gi|24655574	CG7995-PA,CG7995-PB,CG7995-PC,CG7995-PD,CG7995-PE	1
gi|24655568	CG11001-PA	1
gi|24655582	CG7461-PA	1
gi|24655737	CG9277-PB	1
gi|24656102	CG16757-PA	1
gi|24656137	CG9090-PA	1
gi|24656312	CG2107-PA	1
gi|24656494	CG12079-PA	1
gi|24656625,gi|24656628,gi|24656632	CG12740-PA,CG12740-PB,CG12740-PD	1
gi|24656869	CG32267-PA	1
gi|24657023	CG10849-PA	1
gi|24657225,gi|24657230	CG14991-PA,CG14991-PB	1
gi|24657269	CG1167-PA	1
gi|24657303,gi|45551512	CG1333-PA,CG1333-PB	1
gi|24657386,gi|24657391	CG14997-PA,CG14997-PB	1
gi|24657492	CG1319-PA	1
gi|24657813,gi|24657819	CG3074-PA,CG3074-PB	1
gi|24658015	CG7507-PA	1
gi|24658187	CG6018-PA	1
gi|24658229	CG4071-PA	1
gi|24658292	CG4769-PA	1
gi|24658560	CG3612-PA	1
gi|24658585	CG10576-PA	1
gi|24658883	CG3800-PA	1
gi|24659048	CG10467-PA	1
gi|24659379,gi|24659386	CG30415-PA,CG30415-PB	1
gi|24659809,gi|24659814	CG8627-PA,CG8627-PB	1
gi|24659997	CG4457-PA	1
gi|24660041,gi|24660046	CG8582-PA,CG8582-PB	1
gi|24660351	CG12262-PA	1
gi|24660529	CG8194-PA	1
gi|24661058,gi|45552078	CG6416-PA,CG6416-PJ	1
gi|24661095	CG32022-PA	1
gi|24661112,gi|24661116	CG5939-PA,CG5939-PB	1
gi|24661120,gi|24661124	CG5939-PC,CG5939-PD	1
gi|24661488	CG4447-PA	1
gi|24661707,gi|24661711	CG3395-PA,CG3395-PD	1
gi|24661830	CG8284-PA	1
gi|24662081,gi|24662085,gi|24662089,gi|24662093,gi|24662097	CG11989-PA,CG11989-PB,CG11989-PC,CG11989-PD,CG11989-PE	1
gi|24662306	CG6463-PA	1
gi|24662393	CG7923-PA	1
gi|24662435	CG32069-PA	1
gi|24662704	CG6132-PA	1
gi|24662741	CG7394-PA	1
gi|24662918	CG10361-PA	1
gi|24662922	CG32092-PB	1
gi|24662946	CG7283-PA	1
gi|24663043	CG5700-PB	1
gi|24663131	CG5654-PA	1
gi|24663300	CG10616-PA	1
gi|24663668,gi|24663672	CG11276-PA,CG11276-PB	1
gi|24663920	CG7002-PA	1
gi|24664166	CG3836-PA	1
gi|24664191,gi|24664195	CG4994-PA,CG4994-PB	1
gi|24664933	CG6025-PA	1
gi|24664937	CG5949-PA	1
gi|24665049	CG5474-PA	1
gi|24665154	CG13047-PA	1
gi|24665233	CG13037-PA	1
gi|24665282,gi|24665285,gi|24665289	CG4729-PA,CG4729-PB,CG4729-PC	1
gi|24665368,gi|24665372	CG4123-PA,CG4123-PB	1
gi|24665395	CG4169-PA	1
gi|24665772	CG7930-PA	1
gi|24666167	CG5506-PA	1
gi|24666497,gi|24666501	CG3961-PA,CG3961-PC	1
gi|24666513	CG3902-PA	1
gi|24666596	CG6812-PA	1
gi|24666674	CG9629-PA	1
gi|24667089	CG7809-PA	1
gi|24667294	CG6948-PA	1
gi|24667554	CG6020-PA	1
gi|24667933	CG10504-PA	1
gi|24667974	CG7752-PA	1
gi|24668198	CG7625-PA	1
gi|24668413,gi|24668417,gi|24668425	CG7145-PA,CG7145-PB,CG7145-PD	1
gi|24668758	CG11137-PA	1
gi|24668874,gi|24668878	CG32230-PA,CG32230-PB	1
gi|24762502	CG11390-PA	1
gi|24762618	CG3416-PA	1
gi|24762701,gi|24762703,gi|24762705	CG3683-PA,CG3683-PB,CG3683-PC	1
gi|24762794	CG2803-PA	1
gi|28558750,gi|28558752,gi|28558754,gi|28558756	CG1651-PA,CG1651-PB,CG1651-PC,CG1651-PD	1
gi|28571493,gi|28571495,gi|28571497,gi|28571499	CG11739-PA,CG11739-PB,CG11739-PC,CG11739-PD	1
gi|28571501	CG1084-PA	1
gi|28571728	CG31478-PA	1
gi|28571789	CG5793-PA	1
gi|28571792	CG31233-PA	1
gi|28571955	CG1635-PA	1
gi|28572004	CG2171-PA	1
gi|28572036	CG33103-PA	1
gi|28572126	CG13849-PA	1
gi|28572127	CG6028-PA	1
gi|28573010	CG33101-PA	1
gi|28573018	CG9796-PA	1
gi|28573391	CG8505-PA	1
gi|28573410	CG33138-PA	1
gi|28573549	CG5134-PB	1
gi|28573630	CG33149-PA	1
gi|28573701	CG9416-PA	1
gi|28573846	CG8768-PA	1
gi|28573949	CG8055-PA	1
gi|28574115	CG4747-PA	1
gi|28574296	CG1065-PA	1
gi|28574298	CG14977-PA	1
gi|28574499	CG6917-PA	1
gi|28574622	CG7654-PA	1
gi|28574660	CG33113-PF	1
gi|28574898	CG5931-PA	1
gi|28574933	CG6310-PA	1
gi|28574956	CG7506-PA	1
gi|45549037	CG2210-PA	1
gi|45549139	CG9916-PA	1
gi|45549185	CG2827-PA	1
gi|45549187	CG4634-PA	1
gi|45549224	CG6455-PA	1
gi|45549226	CG5320-PA	1
gi|45549259	CG6341-PA	1
gi|45549263,gi|45552217	CG9124-PA,CG9124-PB	1
gi|45549316	CG3566-PB	1
gi|45549573	CG9914-PA	1
gi|45550087	CG2807-PA	1
gi|45550141	CG9527-PA	1
gi|45550188	CG9031-PA	1
gi|45550400	CG1665-PA	1
gi|45550423	CG16935-PA	1
gi|45550476	CG9480-PA	1
gi|45550506	CG2970-PA	1
gi|45550575	CG32355-PA	1
gi|45550577	CG6416-PB	1
gi|45550579	CG3911-PA	1
gi|45550723	CG31352-PA	1
gi|45550732	CG6544-PA	1
gi|45550736	CG6666-PA	1
gi|45550758	CG10340-PA	1
gi|45550800,gi|45551954	CG10217-PA,CG10217-PB	1
gi|45550806	CG6000-PA	1
gi|45551063,gi|45551065	CG17870-PC,CG17870-PF	1
gi|45551086	CG8983-PA	1
gi|45551540	CG6767-PB	1
gi|45551893	CG6904-PA	1
gi|45552315	CG33303-PA	1
gi|45553069	CG7319-PC	1
gi|45553375	CG4898-PL	1
gi|56292537	CG3305-PA	1
gi|62862508	CG40451-PA	1
gi|62862516	CG17374-PA	1
gi|62862658	CG40002-PA	1
gi|85726431	CG13163-PA	1
gi|116007352	CG9243-PB	1
gi|116007706,gi|78707228	CG30084-PE,CG30084-PG	1
gi|116007762	CG33484-PD	1
gi|116008410	CG5379-PA	1
gi|161076014,gi|161076016	CG40084-PA,CG40084-PB	1
gi|161076329	CG33554-PA	1
gi|161076518	CG30015-PC	1
gi|161076551	CG34228-PA	1
gi|161076705	CG33715-PD	1
gi|161076970	CG34343-PD	1
gi|161077029	CG34439-PA	1
gi|161077121,gi|78709100	CG30084-PC,CG30084-PF	1
gi|161077186,gi|45552677	CG34415-PC,CG34415-PD	1
gi|161077242	CG15081-PE	1
gi|161077401	CG34445-PA	1
gi|161077453,gi|161077455	CG33519-PB,CG33519-PC	1
gi|161077537	CG33950-PG	1
gi|161077598	CG34417-PD	1
gi|161077951	CG34329-PA	1
gi|161078446	CG17838-PC	1
gi|161079266	CG15537-PB	1
gi|161084461	CG11661-PI	1
gi|17136652,gi|17975524,gi|17975575,gi|24655024	CG1179-PA,CG1180-PA,CG9111-PA,CG9118-PA	1
gi|17137090,gi|24646579	CG18290-PA,CG18290-PB	1
gi|17647275	CG11330-PA	1
gi|17647279	CG6533-PA	1
gi|17737563	CG11720-PA	1
gi|17864156	CG2098-PA	1
gi|18858163	CG4666-PA	1
gi|19920542	CG4233-PC	1
gi|19920852	CG11236-PA	1
gi|19922742	CG3624-PA	1
gi|20129455	CG4851-PA	1
gi|21355921	CG11589-PA	1
gi|21357651	CG1155-PA	1
gi|21358295,gi|24646746	CG3153-PA,CG3153-PB	1
gi|21358325	CG1140-PA	1
gi|24581793	CG3792-PA	1
gi|24583077,gi|24583079	CG4389-PB,CG4389-PC	1
gi|24584698	CG17927-PJ	1
gi|24584702,gi|24584706	CG17927-PD,CG17927-PI	1
gi|24586157	CG12843-PA	1
gi|24641174	CG15203-PA	1
gi|24642031,gi|24642033	CG32593-PB,CG32593-PF	1
gi|24643050	CG15043-PA	1
gi|24645536	CG16905-PA	1
gi|24645576	CG31407-PA	1
gi|24645636,gi|24645638	CG6281-PA,CG6281-PB	1
gi|24646928	CG3610-PA	1
gi|24647711	CG7587-PA	1
gi|24655271	CG15096-PB	1
gi|24656064	CG16761-PA	1
gi|24657484	CG15012-PB	1
gi|24662167,gi|24662171	CG32056-PB,CG32056-PC	1
gi|24662717,gi|78706642	CG6128-PA,CG6128-PB	1
gi|24664203	CG13480-PA	1
gi|24666745,gi|24666758	CG32208-PA,CG32213-PA	1
gi|24667756	CG13255-PA	1
gi|28574402	CG13284-PB	1
gi|28574408	CG6416-PF	1
gi|45550359	CG14401-PA	1
gi|45550471	CG16799-PA	1
gi|45551068	CG18408-PB	1
gi|45551164	CG30423-PB	1
gi|45551208	CG4199-PF	1
gi|45553007	CG34455-PC	1
gi|5835236	CG34069-PA	1
gi|5835240	CG34076-PA	1
gi|5835245	CG34090-PA	1
gi|62473654	CG7107-PG	1
gi|62473664	CG7107-PF	1
gi|78706474	CG33950-PF	1
gi|78706546,gi|78706548	CG17767-PB,CG17767-PC	1
gi|78706744,gi|78706746,gi|78706748,gi|78706750	CG6782-PA,CG6782-PC,CG6782-PD,CG6782-PE	1
gi|78706752,gi|78706754	CG6783-PB,CG6783-PC	1
gi|78706758	CG10097-PB	1
gi|78706776,gi|78709078	CG7217-PA,CG7217-PB	1
gi|78706922,gi|78706924,gi|78706926,gi|78706928,gi|78706930	CG3481-PC,CG3481-PE,CG3481-PF,CG3481-PH,CG3481-PI	1
gi|78707188,gi|78707190	CG18003-PA,CG18003-PB	1
gi|78742340	CG13383-PB	1
gi|85724812	CG34026-PA	1
gi|85724872,gi|85724874	CG33979-PA,CG33979-PB	1
gi|85725222	CG33977-PA	1

## Sheet: GO Biological Proc Enriched
Description	Count [%]	Ref. Count [%]	Count	Ref. Count	Raw p-value	FDR p-value
cellular component organization or biogenesis at cellular level	30.38	0.25	72	46	<4.9E-324	<4.9E-324
cellular component maintenance at cellular level	0.84	0	2	0	<4.9E-324	<4.9E-324
positive regulation of neural precursor cell proliferation	0.42	0	1	0	<4.9E-324	<4.9E-324
protein deglycosylation	0.42	0	1	0	<4.9E-324	<4.9E-324
regulation of neural precursor cell proliferation	0.42	0	1	0	<4.9E-324	<4.9E-324
small molecule metabolic process	29.54	11.98	70	2222	2.831e-11	5.02e-09
cellular process	86.08	62.72	204	11633	4.028e-10	6.696e-08
macromolecule localization	21.52	8.31	51	1542	6.209e-09	7.864e-07
metabolic process	73	49.97	173	9268	6.691e-09	8.091e-07
carbohydrate metabolic process	16.88	5.94	40	1102	3.126e-08	2.969e-06
glucose metabolic process	6.75	1.18	16	219	9.164e-08	7.863e-06
cellular metabolic process	65.82	44.64	156	8280	1.434e-07	1.156e-05
alcohol metabolic process	11.81	3.5	28	650	1.57e-07	1.228e-05
cellular carbohydrate metabolic process	12.24	3.77	29	700	2.104e-07	1.599e-05
hexose metabolic process	7.17	1.42	17	264	2.232e-07	1.622e-05
generation of precursor metabolites and energy	16.03	5.9	38	1094	2.256e-07	1.622e-05
small molecule biosynthetic process	12.66	4.3	30	797	9.691e-07	5.995e-05
lipid localization	5.49	0.95	13	176	1.339e-06	8.097e-05
oxidation reduction	16.03	6.48	38	1202	2.278e-06	0.0001227
primary metabolic process	63.71	44.32	151	8220	2.505e-06	0.0001257
carboxylic acid biosynthetic process	6.75	1.53	16	283	2.834e-06	0.0001371
organic acid biosynthetic process	6.75	1.53	16	283	2.834e-06	0.0001371
carboxylic acid metabolic process	13.08	4.81	31	892	3.333e-06	0.0001507
oxoacid metabolic process	13.08	4.81	31	892	3.333e-06	0.0001507
biological_process	92.41	74.92	219	13896	3.342e-06	0.0001507
organic acid metabolic process	13.08	4.82	31	894	3.489e-06	0.0001547
energy derivation by oxidation of organic compounds	9.28	2.78	22	516	4.306e-06	0.0001877
catabolic process	16.88	7.27	40	1348	5.589e-06	0.0002398
cellular carbohydrate catabolic process	5.49	1.08	13	201	5.845e-06	0.0002468
cellular ketone metabolic process	13.08	4.95	31	919	6.104e-06	0.0002537
monosaccharide metabolic process	8.02	2.22	19	412	6.607e-06	0.0002704
small molecule catabolic process	8.44	2.47	20	459	8.704e-06	0.0003508
glucose catabolic process	4.64	0.81	11	151	1.009e-05	0.0004004
intracellular transport	14.35	5.87	34	1089	1.09e-05	0.0004265
hexose catabolic process	4.64	0.83	11	154	1.216e-05	0.0004687
glycolysis	4.22	0.68	10	127	1.299e-05	0.0004936
microtubule cytoskeleton organization	9.7	3.26	23	604	1.63e-05	0.000594
organelle organization	24.47	12.9	58	2393	1.843e-05	0.0006538
cellular component organization at cellular level	29.11	16.35	69	3033	1.913e-05	0.0006595
acetyl-CoA catabolic process	3.8	0.57	9	106	1.934e-05	0.0006595
tricarboxylic acid cycle	3.8	0.57	9	106	1.934e-05	0.0006595
alcohol catabolic process	5.06	1.04	12	193	1.991e-05	0.0006703
coenzyme catabolic process	3.8	0.58	9	107	2.086e-05	0.0006935
cofactor catabolic process	3.8	0.59	9	109	2.42e-05	0.0007852
cellular respiration	5.49	1.24	13	230	2.473e-05	0.0007926
mitotic spindle elongation	3.8	0.6	9	111	2.799e-05	0.0008761
coenzyme metabolic process	7.59	2.25	18	418	2.902e-05	0.0008874
acetyl-CoA metabolic process	3.8	0.6	9	112	3.007e-05	0.0008988
spindle elongation	3.8	0.6	9	112	3.007e-05	0.0008988
cytoskeleton organization	15.61	7	37	1298	3.188e-05	0.0009421
monosaccharide catabolic process	4.64	0.93	11	173	3.602e-05	0.001041
carbohydrate catabolic process	5.49	1.3	13	242	4.2e-05	0.001188
monocarboxylic acid metabolic process	6.33	1.7	15	315	4.396e-05	0.001205
cofactor metabolic process	8.44	2.79	20	518	4.903e-05	0.001317
cellular nitrogen compound biosynthetic process	10.13	3.74	24	694	5.012e-05	0.001333
lipid storage	2.53	0.26	6	49	6.303e-05	0.00166
spindle organization	6.33	1.76	15	327	6.716e-05	0.001751
heterocycle metabolic process	10.55	4.07	25	755	6.996e-05	0.001807
ATP metabolic process	5.06	1.19	12	220	7.164e-05	0.001823
microtubule-based process	10.97	4.33	26	803	7.195e-05	0.001823
aerobic respiration	3.8	0.68	9	126	7.597e-05	0.001871
establishment of localization in cell	15.61	7.32	37	1358	8.255e-05	0.001996
cellular component organization or biogenesis	37.97	24.14	90	4478	8.416e-05	0.002017
cellular localization	16.88	8.21	40	1523	9.124e-05	0.002129
establishment of protein localization	13.08	5.72	31	1060	9.444e-05	0.002184
lipid transport	3.8	0.72	9	133	0.0001153	0.002577
mitotic spindle organization	5.49	1.48	13	274	0.0001475	0.003216
ribonucleotide biosynthetic process	5.49	1.48	13	275	0.0001529	0.003307
muscle contraction	4.64	1.1	11	204	0.0001584	0.003318
muscle system process	4.64	1.1	11	204	0.0001584	0.003318
protein transport	12.66	5.63	30	1044	0.0001682	0.003496
ribonucleotide metabolic process	6.33	1.92	15	356	0.000172	0.003518
protein localization	14.35	6.78	34	1258	0.0001934	0.003868
endocytosis	8.44	3.09	20	574	0.0001967	0.003875
membrane invagination	8.44	3.09	20	574	0.0001967	0.003875
cellular component organization	36.71	23.66	87	4388	0.0002002	0.003898
cellular catabolic process	13.08	5.96	31	1106	0.0002023	0.003898
transport	31.65	19.59	75	3634	0.0002047	0.003916
vesicle-mediated transport	11.81	5.18	28	961	0.0002247	0.004209
ATP biosynthetic process	4.64	1.17	11	217	0.0002708	0.004868
nucleobase, nucleoside and nucleotide biosynthetic process	6.75	2.24	16	416	0.0002944	0.005187
nucleobase, nucleoside, nucleotide and nucleic acid biosynthetic process	6.75	2.24	16	416	0.0002944	0.005187
nucleobase, nucleoside and nucleotide metabolic process	9.28	3.72	22	690	0.0003274	0.005619
purine ribonucleotide biosynthetic process	5.06	1.41	12	262	0.0003646	0.006134
purine nucleoside triphosphate biosynthetic process	4.64	1.21	11	225	0.000369	0.006134
purine ribonucleoside triphosphate biosynthetic process	4.64	1.21	11	225	0.000369	0.006134
intracellular protein transport	10.55	4.55	25	844	0.0003887	0.006328
purine ribonucleotide metabolic process	5.91	1.85	14	343	0.0003896	0.006328
ATP-dependent proteolysis	1.69	0.13	4	25	0.0003902	0.006328
regulation of lipid storage	1.69	0.13	4	25	0.0003902	0.006328
ribonucleoside triphosphate biosynthetic process	4.64	1.23	11	228	0.0004127	0.006574
sequestering of triglyceride	1.27	0.06	3	11	0.0004235	0.006626
purine ribonucleoside triphosphate metabolic process	5.49	1.65	13	306	0.00043	0.006689
purine nucleoside triphosphate metabolic process	5.49	1.66	13	307	0.0004435	0.006859
cellular protein localization	10.55	4.6	25	853	0.0004544	0.006987
ribonucleoside triphosphate metabolic process	5.49	1.67	13	309	0.0004716	0.007168
nucleoside triphosphate biosynthetic process	4.64	1.26	11	234	0.0005135	0.00776
regulation of tube architecture, open tracheal system	3.38	0.7	8	130	0.0005239	0.007874
synaptic vesicle endocytosis	2.53	0.39	6	72	0.0005375	0.008033
cellular macromolecule localization	11.39	5.2	27	965	0.0005494	0.008164
purine nucleotide biosynthetic process	5.49	1.7	13	315	0.000565	0.008349
regulation of centrosome duplication	0.84	0.02	2	3	0.0005917	0.008601
nucleobase metabolic process	3.38	0.72	8	133	0.0006096	0.008765
regulation of tube length, open tracheal system	2.11	0.27	5	50	0.0006832	0.009719
nucleoside triphosphate metabolic process	5.49	1.74	13	322	0.0006933	0.009809
sperm individualization	2.53	0.41	6	76	0.0007177	0.01005
purine nucleotide metabolic process	6.33	2.21	15	409	0.0007415	0.01033
electron transport	8.02	3.19	19	592	0.0007754	0.01069
amine biosynthetic process	4.22	1.13	10	209	0.0008008	0.01092
cellular aromatic compound metabolic process	6.33	2.23	15	413	0.0008185	0.01111
establishment of localization	32.07	20.83	76	3863	0.0008245	0.01113
regulation of tube size, open tracheal system	2.53	0.43	6	79	0.0008811	0.01184
cellular amino acid biosynthetic process	3.8	0.95	9	176	0.0009113	0.01212
extracellular structure organization	5.06	1.58	12	293	0.0009783	0.01288
nucleobase biosynthetic process	1.69	0.17	4	32	0.001026	0.01345
cellular membrane organization	8.86	3.81	21	706	0.001089	0.01419
cell wall macromolecule biosynthetic process	1.27	0.08	3	15	0.00112	0.01432
cellular component macromolecule biosynthetic process	1.27	0.08	3	15	0.00112	0.01432
peptidoglycan biosynthetic process	1.27	0.08	3	15	0.00112	0.01432
membrane organization	8.86	3.82	21	708	0.001128	0.01435
glycerophosphate shuttle	0.84	0.02	2	4	0.001172	0.01485
cell-cell junction organization	2.95	0.62	7	115	0.001242	0.01557
cellular component biogenesis	16.46	9.04	39	1677	0.001266	0.01567
mitochondrial transport	2.53	0.46	6	85	0.001292	0.01587
localization	34.6	23.23	82	4308	0.001306	0.01593
peptidoglycan-based cell wall biogenesis	1.27	0.09	3	16	0.001364	0.01657
protein metabolic process	32.49	21.54	77	3995	0.001388	0.01665
nucleotide biosynthetic process	5.91	2.11	14	391	0.00139	0.01665
septate junction assembly	2.11	0.32	5	59	0.001457	0.01708
extracellular matrix organization	2.53	0.47	6	87	0.001458	0.01708
regulation of tube size	2.53	0.47	6	88	0.001546	0.01796
cell junction organization	2.95	0.65	7	120	0.001589	0.01837
polysaccharide biosynthetic process	2.53	0.48	6	89	0.001639	0.01847
cell wall biogenesis	1.27	0.09	3	17	0.001639	0.01847
lipid metabolic process	10.55	5.07	25	941	0.001816	0.0203
determination of adult lifespan	3.38	0.86	8	159	0.001929	0.02138
multicellular organismal aging	3.38	0.86	8	159	0.001929	0.02138
nucleobase, nucleoside, nucleotide and nucleic acid transport	2.95	0.67	7	125	0.002007	0.02215
regulation of localization	5.49	1.96	13	363	0.00204	0.02243
fatty acid biosynthetic process	2.53	0.51	6	94	0.002167	0.02362
fatty acid metabolic process	3.8	1.08	9	200	0.002209	0.02398
RNA transport	2.53	0.51	6	95	0.002286	0.02462
nucleic acid transport	2.53	0.51	6	95	0.002286	0.02462
aging	3.38	0.88	8	164	0.002341	0.025
establishment of RNA localization	2.53	0.52	6	97	0.002539	0.02691
maintenance of location	2.95	0.71	7	131	0.002617	0.0274
translation	8.86	4.1	21	760	0.00266	0.02767
cellular amine metabolic process	7.59	3.29	18	610	0.002674	0.02767
mitochondrion organization	2.95	0.71	7	132	0.002731	0.02815
response to extracellular stimulus	2.53	0.53	6	99	0.002813	0.02855
cellular response to external stimulus	1.69	0.23	4	42	0.002862	0.02855
cellular response to extracellular stimulus	1.69	0.23	4	42	0.002862	0.02855
autophagic vacuole assembly	0.84	0.03	2	6	0.002877	0.02855
regulation of sequestering of triglyceride	0.84	0.03	2	6	0.002877	0.02855
regulation of cellular component organization	8.44	3.86	20	715	0.002915	0.02872
ion transmembrane transport	3.38	0.92	8	171	0.003029	0.02973
exocytosis	4.64	1.59	11	294	0.003185	0.03092
response to antibiotic	2.11	0.38	5	71	0.003304	0.0318
regulation of tube diameter, open tracheal system	1.27	0.12	3	22	0.003524	0.03348
proton transport	3.38	0.95	8	177	0.003737	0.03525
hydrogen transport	3.38	0.96	8	178	0.003866	0.03634
regulation of centrosome cycle	0.84	0.04	2	7	0.00399	0.03724
divalent metal ion transport	2.95	0.78	7	144	0.004418	0.04066
cellular homeostasis	5.49	2.17	13	402	0.004857	0.04409
cell redox homeostasis	2.95	0.79	7	147	0.004942	0.04471
cell development	18.99	11.7	45	2170	0.004998	0.04505
glycerol metabolic process	1.69	0.26	4	49	0.005016	0.04505
synaptic vesicle transport	3.38	1	8	186	0.00503	0.04505
regulation of tube diameter	1.27	0.13	3	25	0.005101	0.04538
nucleoside phosphate metabolic process	7.17	3.23	17	599	0.005135	0.04538
nucleotide metabolic process	7.17	3.23	17	599	0.005135	0.04538
mitochondrial DNA metabolic process	0.84	0.04	2	8	0.00527	0.04596
mitochondrial DNA replication	0.84	0.04	2	8	0.00527	0.04596
alditol metabolic process	1.69	0.27	4	50	0.005393	0.04673
response to toxin	3.38	1.02	8	189	0.00553	0.04775
cellular component assembly	14.35	8.28	34	1535	0.005705	0.04823
synaptic vesicle budding	1.27	0.14	3	26	0.005707	0.04823
synaptic vesicle budding from presynaptic membrane	1.27	0.14	3	26	0.005707	0.04823
ATP synthesis coupled proton transport	2.95	0.81	7	151	0.005711	0.04823
energy coupled proton transport, down electrochemical gradient	2.95	0.81	7	151	0.005711	0.04823
receptor-mediated endocytosis	2.11	0.44	5	81	0.005805	0.04887

## Sheet: GO Cellular Components Enriched
Description	Count [%]	Ref. Count [%]	Count	Ref. Count	Raw p-value	FDR p-value
cytoplasmic part	55.27	16.96	131	3145	6.908e-37	2.625e-34
cytoplasm	63.71	23.63	151	4382	9.178e-35	3.052e-32
lipid particle	16.88	1.94	40	360	1.73e-24	5.112e-22
intracellular part	69.2	39.38	164	7304	4.379e-16	1.165e-13
intracellular	70.04	41.28	166	7657	9.338e-15	2.258e-12
mitochondrion	16.88	4.35	40	807	3.255e-12	7.214e-10
intracellular organelle part	39.24	18.11	93	3359	5.234e-12	1.028e-09
organelle part	39.66	18.42	94	3417	5.409e-12	1.028e-09
mitochondrial part	12.24	2.96	29	549	1.004e-09	1.571e-07
cytosolic part	7.59	1.14	18	211	1.202e-09	1.776e-07
protein complex	35.44	17.26	84	3201	1.691e-09	2.367e-07
macromolecular complex	38.4	19.72	91	3657	3.727e-09	4.957e-07
intracellular organelle	54.85	33.32	130	6180	8.463e-09	9.788e-07
organelle	54.85	33.36	130	6187	9.169e-09	1.016e-06
cytosolic ribosome	5.49	0.64	13	119	1.342e-08	1.428e-06
cytosol	10.97	2.86	26	530	3.549e-08	3.255e-06
microtubule associated complex	10.97	2.99	26	555	8.873e-08	7.863e-06
ribosomal subunit	6.33	1.06	15	196	1.275e-07	1.06e-05
intracellular non-membrane-bounded organelle	25.32	12.04	60	2233	4.266e-07	2.91e-05
non-membrane-bounded organelle	25.32	12.04	60	2233	4.266e-07	2.91e-05
cell	80.17	59.9	190	11110	7.699e-07	4.995e-05
cell part	80.17	59.9	190	11110	7.699e-07	4.995e-05
mitochondrial lumen	5.91	1.16	14	215	2.352e-06	0.0001227
mitochondrial matrix	5.91	1.16	14	215	2.352e-06	0.0001227
cytosolic large ribosomal subunit	3.38	0.33	8	62	2.482e-06	0.0001257
microtubule cytoskeleton	11.39	4.16	27	772	1.351e-05	0.0005062
ribosome	6.33	1.61	15	298	2.318e-05	0.0007613
cytoskeleton	14.77	6.47	35	1200	3.358e-05	0.0009816
organelle membrane	11.81	4.66	28	865	3.744e-05	0.001071
membrane-bounded organelle	42.62	27.91	101	5176	7.489e-05	0.00187
cytoskeletal part	12.66	5.43	30	1008	9.063e-05	0.002129
omega speckle	1.69	0.1	4	18	0.000102	0.002319
intracellular membrane-bounded organelle	42.19	27.81	100	5157	0.0001099	0.002478
mitochondrial envelope	6.33	1.88	15	349	0.0001384	0.003043
vacuole	3.8	0.75	9	140	0.0001704	0.003513
large ribosomal subunit	3.38	0.62	8	115	0.0002286	0.004252
mitochondrial membrane	5.91	1.76	14	326	0.0002328	0.004301
lysosome	2.53	0.34	6	63	0.0002598	0.004701
small ribosomal subunit	2.95	0.49	7	90	0.000285	0.005088
lytic vacuole	2.53	0.35	6	65	0.0003085	0.005363
organelle inner membrane	5.49	1.61	13	298	0.0003341	0.005697
ribonucleoprotein complex	9.7	4.01	23	743	0.0003635	0.006134
mitochondrial inner membrane	5.06	1.43	12	265	0.0004039	0.006473
envelope	8.44	3.31	20	614	0.0004689	0.007168
monolayer-surrounded lipid storage body	0.84	0.02	2	3	0.0005917	0.008601
germline ring canal	2.11	0.27	5	50	0.0006832	0.009719
membrane-enclosed lumen	10.55	4.74	25	879	0.0007024	0.009886
cell wall	2.11	0.27	5	51	0.0007489	0.01038
nuclear speck	1.69	0.17	4	31	0.0009081	0.01212
intercellular bridge	2.11	0.29	5	54	0.0009742	0.01288
organelle envelope	7.17	2.78	17	516	0.001102	0.01429
cytosolic small ribosomal subunit	2.11	0.31	5	57	0.001246	0.01557
cellular_component	82.7	67.42	196	12505	0.001263	0.01567
synapse	5.49	1.88	13	348	0.001405	0.01676
endoplasmic reticulum	6.75	2.6	16	483	0.001452	0.01708
6-phosphofructokinase complex	1.27	0.09	3	17	0.001639	0.01847
unconventional myosin complex	1.27	0.09	3	17	0.001639	0.01847
intracellular organelle lumen	9.7	4.58	23	849	0.002162	0.02362
organelle lumen	9.7	4.64	23	861	0.00258	0.02723
sperm individualization complex	1.27	0.11	3	20	0.002663	0.02767
myosin VI complex	0.84	0.03	2	6	0.002877	0.02855
transport vesicle	1.69	0.23	4	43	0.003121	0.0304
presynaptic membrane	1.69	0.24	4	44	0.003395	0.03249
nuclear body	1.69	0.24	4	45	0.003686	0.03489
clathrin coat of coated pit	0.84	0.04	2	7	0.00399	0.03724
glycerol-3-phosphate dehydrogenase complex	1.27	0.13	3	24	0.004536	0.04161
synapse part	4.22	1.46	10	271	0.005323	0.04627
chromatin	4.22	1.47	10	273	0.005599	0.0482

## Sheet: GO Molecular Function Enriched
Description	Count [%]	Ref. Count [%]	Count	Ref. Count	Raw p-value	FDR p-value
aspartate-ammonia ligase activity	0.42	0	1	0	<4.9E-324	<4.9E-324
oxidoreductase activity	19.41	7.32	46	1358	1.993e-08	2.039e-06
catalytic activity	61.18	39.43	145	7313	2.458e-08	2.421e-06
nucleoside-triphosphatase activity	16.88	6.75	40	1251	8.842e-07	5.6e-05
pyrophosphatase activity	16.88	6.86	40	1273	1.372e-06	8.108e-05
structural molecule activity	17.3	7.13	41	1323	1.407e-06	8.136e-05
hydrolase activity, acting on acid anhydrides, in phosphorus-containing anhydrides	16.88	6.96	40	1291	1.946e-06	0.0001101
hydrolase activity, acting on acid anhydrides	16.88	6.97	40	1293	2.022e-06	0.0001121
ATPase activity, coupled	10.97	3.62	26	671	3.232e-06	0.0001507
ATPase activity	10.97	3.96	26	735	1.623e-05	0.000594
structural constituent of ribosome	6.33	1.56	15	290	1.686e-05	0.000606
oxidoreductase activity, acting on NADH or NADPH	3.8	0.6	9	111	2.799e-05	0.0008761
ATPase activity, coupled to transmembrane movement of ions, phosphorylative mechanism	4.22	0.75	10	139	2.855e-05	0.000883
ATPase activity, coupled to movement of substances	6.33	1.7	15	315	4.396e-05	0.001205
ATPase activity, coupled to transmembrane movement of substances	6.33	1.7	15	315	4.396e-05	0.001205
hydrolase activity, acting on acid anhydrides, catalyzing transmembrane movement of substances	6.33	1.71	15	317	4.725e-05	0.001282
nucleotide binding	26.58	15.12	63	2804	7.524e-05	0.00187
oxidoreductase activity, acting on NADH or NADPH, NAD or NADP as acceptor	1.69	0.09	4	17	8.023e-05	0.001958
oxidoreductase activity, acting on the aldehyde or oxo group of donors	2.95	0.4	7	75	9.056e-05	0.002129
GTPase activity	5.49	1.42	13	264	0.0001018	0.002319
purine nucleotide binding	22.36	12.2	53	2263	0.0001177	0.00261
P-P-bond-hydrolysis-driven transmembrane transporter activity	6.33	1.9	15	353	0.0001568	0.003318
primary active transmembrane transporter activity	6.33	1.9	15	353	0.0001568	0.003318
structural constituent of cytoskeleton	7.59	2.6	18	483	0.0001827	0.003709
phosphofructokinase activity	1.69	0.11	4	21	0.000193	0.003868
hydrolase activity	31.65	19.58	75	3632	0.000201	0.003898
ATPase activity, coupled to transmembrane movement of ions	4.64	1.14	11	211	0.0002126	0.00404
biotin binding	1.27	0.05	3	9	0.0002201	0.004153
purine ribonucleotide binding	20.68	11.33	49	2102	0.0002545	0.004636
ribonucleotide binding	20.68	11.33	49	2102	0.0002545	0.004636
NAD or NADH binding	3.38	0.65	8	120	0.0003057	0.005351
calmodulin binding	3.8	0.82	9	152	0.0003152	0.005444
hydrogen-exporting ATPase activity, phosphorylative mechanism	2.53	0.37	6	68	0.0003946	0.006362
D-alanine-D-alanine ligase activity	1.27	0.06	3	11	0.0004235	0.006626
ligase activity, forming carbon-carbon bonds	1.27	0.06	3	11	0.0004235	0.006626
fructose 1,6-bisphosphate 1-phosphatase activity	0.84	0.02	2	3	0.0005917	0.008601
active transmembrane transporter activity	9.7	4.15	23	770	0.0005963	0.00862
cofactor binding	7.17	2.7	17	501	0.0007979	0.01092
GTP binding	5.91	2.08	14	386	0.001231	0.01552
monocarboxylic acid binding	1.69	0.18	4	34	0.001295	0.01587
guanyl ribonucleotide binding	5.91	2.11	14	391	0.00139	0.01665
guanyl nucleotide binding	5.91	2.11	14	392	0.001423	0.0169
oxidoreductase activity, acting on CH-OH group of donors	4.64	1.44	11	267	0.001506	0.01757
6-phosphofructokinase activity	1.27	0.09	3	17	0.001639	0.01847
isocitrate dehydrogenase activity	1.27	0.09	3	17	0.001639	0.01847
oxidoreductase activity, acting on the aldehyde or oxo group of donors, NAD or NADP as acceptor	1.69	0.2	4	37	0.001784	0.02002
adenyl nucleotide binding	18.14	10.6	43	1966	0.002314	0.02482
calcium ion binding	8.02	3.54	19	656	0.002522	0.02684
purine nucleoside binding	18.14	10.66	43	1978	0.002596	0.02729
lyase activity	5.06	1.79	12	332	0.002787	0.02855
manganese ion binding	2.53	0.53	6	99	0.002813	0.02855
nucleoside binding	18.14	10.71	43	1987	0.002826	0.02855
myosin VI binding	0.84	0.03	2	6	0.002877	0.02855
substrate-specific transporter activity	16.03	9.16	38	1698	0.002895	0.02863
glutathione peroxidase activity	1.27	0.11	3	21	0.003075	0.03007
protein binding	54.85	41.55	130	7707	0.003299	0.0318
actin binding	5.49	2.07	13	384	0.003311	0.0318
carbohydrate kinase activity	2.11	0.39	5	72	0.003511	0.03347
oxidoreductase activity, acting on the aldehyde or oxo group of donors, disulfide as acceptor	1.27	0.12	3	23	0.004011	0.0373
cation-transporting ATPase activity	2.95	0.77	7	142	0.004093	0.03793
ATP binding	16.46	9.69	39	1798	0.004355	0.04023
rRNA binding	2.11	0.42	5	77	0.004684	0.04282
adenyl ribonucleotide binding	16.46	9.75	39	1809	0.004826	0.04397
vitamin binding	4.22	1.45	10	269	0.005058	0.04515
protein kinase C inhibitor activity	0.84	0.04	2	8	0.00527	0.04596
thioredoxin peroxidase activity	0.84	0.04	2	8	0.00527	0.04596
calcium-dependent phospholipid binding	1.27	0.14	3	26	0.005707	0.04823
