# Supplementary material for: A Mighty Small Heart: The Cardiac Proteome of Adult Drosophila melanogaster
Source: PLoS One. 2011 Apr 25;6(4):e18497. doi: 10.1371/journal.pone.0018497 (PMC3081823; doi:10.1371/journal.pone.0018497)
Supplement: Table S11 — Relative Protein Abundance List of proteins that comprise the functional classes depicted in Figure 3A. These 245 proteins represent the most abundant proteins, comprising 20% of the identified protein isoforms or clusters and nearly 80% of all assigned spectra. (XLSX) [file pone.0018497.s011.xlsx]

## Sheet: Classification of top 245 prot
Mitochondrial Proteins	Accession No.	MW	ID Probability	Unique Peptides	Unique Spectra	Assigned Spectra	Sequence Coverage
CG1516 CG1516-PE, isoform E [Drosophila melanogaster]	gi|19921944 (+8)	131 kDa	100	36	39	469	34.2
Aconitase CG9244-PB, isoform B [Drosophila melanogaster]	gi|17864292	85 kDa	100	27	37	473	41.7
bellwether CG3612-PA [Drosophila melanogaster]	gi|24658560	59 kDa	100	27	35	476	41.1
CG4389 CG4389-PB, isoform B [Drosophila melanogaster]	gi|24583077 (+1)	80 kDa	100	27	31	210	42.3
CG11198 CG11198-PC, isoform C [Drosophila melanogaster]	gi|161076407 (+3)	262 kDa	100	20	20	52	10.5
CG7461 CG7461-PA [Drosophila melanogaster]	gi|24655582	71 kDa	100	19	21	96	34.5
Glutamate dehydrogenase CG5320-PA, isoform A [Drosophila melanogaster]	gi|45549226	63 kDa	100	18	19	156	33.3
Neural conserved at 73EF CG11661-PI, isoform I [Drosophila melanogaster]	gi|161084461	123 kDa	100	19	20	218	21.9
CG4169 CG4169-PA [Drosophila melanogaster]	gi|24665395	45 kDa	100	18	22	151	57.7
stress-sensitive B CG16944-PA, isoform A [Drosophila melanogaster]	gi|18079273 (+1)	33 kDa	100	18	26	349	50.5
ATP synthase-beta CG11154-PA, isoform A [Drosophila melanogaster]	gi|24638766	54 kDa	100	17	26	585	45.7
porin CG6647-PA, isoform A [Drosophila melanogaster]	gi|17136632 (+2)	31 kDa	100	12	17	129	44
CG9090 CG9090-PA [Drosophila melanogaster]	gi|24656137	41 kDa	100	13	16	119	29.9
CG3731 CG3731-PB, isoform B [Drosophila melanogaster]	gi|21357875 (+1)	52 kDa	100	15	19	116	40.9
CG11963 CG11963-PB, isoform B [Drosophila melanogaster]	gi|161078106 (+1)	55 kDa	100	12	12	179	25.9
Aldehyde dehydrogenase CG3752-PA [Drosophila melanogaster]	gi|20129399	57 kDa	100	16	20	178	34
CG7998 CG7998-PA [Drosophila melanogaster]	gi|24647881	35 kDa	100	13	16	156	36.6
lethal (1) G0156 CG12233-PA, isoform A [Drosophila melanogaster]	gi|24643268 (+1)	39 kDa	100	11	11	132	32.9
CG12262 CG12262-PA [Drosophila melanogaster]	gi|24660351	46 kDa	100	12	13	112	36.3
lethal (2) 44DEa CG8732-PD, isoform D [Drosophila melanogaster]	gi|62471689 (+8)	81 kDa	100	12	12	107	24
CG7470 CG7470-PA [Drosophila melanogaster]	gi|21357643	84 kDa	100	12	16	101	21
Succinyl coenzyme A synthetase alpha subunit CG1065-PA [Drosophila melanogaster]	gi|28574296	34 kDa	100	9	9	99	31.4
ATP synthase-gamma chain CG7610-PA, isoform A [Drosophila melanogaster]	gi|24651125 (+2)	33 kDa	100	14	17	98	51.2
CG6543 CG6543-PA, isoform A [Drosophila melanogaster]	gi|20129971 (+1)	32 kDa	100	8	9	97	34.6
scully CG7113-PA [Drosophila melanogaster]	gi|17737361	27 kDa	100	7	8	94	37.3
Glutamate oxaloacetate transaminase 2 CG4233-PC, isoform C [Drosophila melanogaster]	gi|19920542	44 kDa	100	12	16	88	37.2
yippee interacting protein 2 CG4600-PA [Drosophila melanogaster]	gi|17648125	42 kDa	100	13	16	82	39.9
Succinyl coenzyme A synthetase flavoprotein subunit CG17246-PA, isoform A [Drosophila melanogaster]	gi|17137288 (+2)	72 kDa	100	11	14	78	25
knockdown CG3861-PB, isoform B [Drosophila melanogaster]	gi|24640124 (+1)	58 kDa	100	12	15	71	30.6
CG11876 CG11876-PD, isoform D [Drosophila melanogaster]	gi|21358145 (+1)	39 kDa	100	9	12	71	22.7
CG5261 CG5261-PB, isoform B [Drosophila melanogaster]	gi|20129315	54 kDa	100	8	8	69	17
NADH:ubiquinone reductase 75kD subunit precursor CG2286-PA, isoform A [Drosophila melanogaster]	gi|24640557 (+1)	79 kDa	100	14	17	68	27.4
Oligomycin sensitivity-conferring protein CG4307-PA, isoform A [Drosophila melanogaster]	gi|24647054	22 kDa	100	10	13	64	45.5
CG8888 CG8888-PA [Drosophila melanogaster]	gi|19922066	43 kDa	100	8	8	64	21.1
aralar1 CG2139-PC, isoform C [Drosophila melanogaster]	gi|24651387 (+3)	77 kDa	100	14	15	61	23.1
CG7145 CG7145-PA, isoform A [Drosophila melanogaster]	gi|24668413 (+2)	64 kDa	100	13	13	55	27.9
Thiolase CG4581-PA [Drosophila melanogaster]	gi|17137578	51 kDa	100	7	8	55	16.6
Heat shock protein 60 CG12101-PA, isoform A [Drosophila melanogaster]	gi|24641191 (+1)	61 kDa	100	16	17	54	34
CG3902 CG3902-PA [Drosophila melanogaster]	gi|24666513	45 kDa	100	8	9	54	21.7
CG12140 CG12140-PA [Drosophila melanogaster]	gi|24652256	66 kDa	100	10	12	51	22
CG6455 CG6455-PA, isoform A [Drosophila melanogaster]	gi|45549224	94 kDa	100	11	11	49	15.6
CG5214 CG5214-PA [Drosophila melanogaster]	gi|24645909	50 kDa	100	7	8	48	18.2
ATP synthase, subunit b CG8189-PB, isoform B [Drosophila melanogaster]	gi|24661888 (+1)	18 kDa	100	6	8	47	31.4
CG7834 CG7834-PA, isoform A [Drosophila melanogaster]	gi|24651145 (+1)	27 kDa	100	8	9	46	35.6
Mitochondrial phosphate carrier protein CG4994-PA, isoform A [Drosophila melanogaster]	gi|24664191 (+1)	39 kDa	100	8	12	46	32
Succinate dehydrogenase B CG3283-PA [Drosophila melanogaster]	gi|17137106	34 kDa	100	9	9	39	27.3
lethal (3) neo18 CG9762-PA [Drosophila melanogaster]	gi|21356475	22 kDa	100	6	6	39	30.1
CG6439 CG6439-PA [Drosophila melanogaster]	gi|24648872	40 kDa	100	6	6	38	20.3
CG5703 CG5703-PA [Drosophila melanogaster]	gi|18859877	27 kDa	100	9	9	37	38.8
CG4769 CG4769-PA [Drosophila melanogaster]	gi|24658292	34 kDa	100	8	10	37	28.7
ATP synthase, subunit d CG6030-PA, isoform A [Drosophila melanogaster]	gi|17738043 (+1)	20 kDa	100	8	10	36	40.4
CG3560 CG3560-PA [Drosophila melanogaster]	gi|24642430	14 kDa	100	6	7	35	36.9
Isocitrate dehydrogenase CG7176-PC, isoform C [Drosophila melanogaster]	gi|21356561 (+6)	53 kDa	100	14	15	35	31.3
CG7430 CG7430-PA [Drosophila melanogaster]	gi|21358499	53 kDa	100	9	11	34	24.6
lethal (1) G0334 CG7010-PC, isoform C [Drosophila melanogaster]	gi|24639740 (+2)	49 kDa	100	11	11	33	26.8
Glutamine synthetase 1 CG2718-PB, isoform B [Drosophila melanogaster]	gi|17136208 (+1)	44 kDa	100	7	8	32	23.3
lethal (1) G0255 CG4094-PA, isoform A [Drosophila melanogaster]	gi|24640177 (+1)	54 kDa	100	9	10	30	24.8
CG6782 CG6782-PE, isoform E [Drosophila melanogaster]	gi|78706744 (+3)	34 kDa	100	10	10	28	25.9
NADH:ubiquinone reductase 42kD subunit precursor CG6343-PA, isoform A [Drosophila melanogaster]	gi|17933656 (+1)	47 kDa	100	7	7	28	19.7
lethal (2) 03709 CG15081-PE, isoform E [Drosophila melanogaster]	gi|161077242	37 kDa	100	6	7	25	19.8
lethal (2) 35Di CG13240-PA, isoform A [Drosophila melanogaster]	gi|19921400	19 kDa	100	6	8	25	39.5
CG16935 CG16935-PA [Drosophila melanogaster]	gi|45550423	39 kDa	100	9	9	24	29.1
CG9140 CG9140-PA [Drosophila melanogaster]	gi|19920794	52 kDa	100	8	8	22	17.9
CG12079 CG12079-PA [Drosophila melanogaster]	gi|24656494	30 kDa	100	5	7	22	25.3
lethal (2) k05713 CG8256-PD, isoform D [Drosophila melanogaster]	gi|161077125 (+3)	80 kDa	100	8	9	21	13.3
CG9629 CG9629-PA [Drosophila melanogaster]	gi|24666674	58 kDa	100	6	6	21	14.8
CG3961 CG3961-PA, isoform A [Drosophila melanogaster]	gi|24666497 (+1)	79 kDa	100	6	6	20	12.6
lethal (2) 37Cc CG10691-PA, isoform A [Drosophila melanogaster]	gi|24585145 (+1)	30 kDa	100	9	9	18	43.8
Cytochrome c oxidase subunit Va CG14724-PA, isoform A [Drosophila melanogaster]	gi|17137302 (+1)	17 kDa	100	6	6	17	34.2
CG17896 CG17896-PB, isoform B [Drosophila melanogaster]	gi|24638876 (+1)	56 kDa	100	8	8	16	22.1
Arc42 CG4703-PA [Drosophila melanogaster]	gi|21356377	44 kDa	100	6	6	12	15.8
CG2107 CG2107-PA [Drosophila melanogaster]	gi|24656312	75 kDa	100	6	6	11	11.2
CG1907 CG1907-PA [Drosophila melanogaster]	gi|21358457	35 kDa	100	5	6	11	15.5
CG1140 CG1140-PA, isoform A [Drosophila melanogaster]	gi|21358325	55 kDa	100	6	6	10	16.3
Trap1 CG3152-PA [Drosophila melanogaster]	gi|24586016	78 kDa	100	6	6	10	14.2
Mdh CG5889-PA [Drosophila melanogaster]	gi|21356279	69 kDa	100	6	6	9	10.5
NADH:ubiquinone reductase 23kD subunit precursor CG3944-PA [Drosophila melanogaster]	gi|17864306	25 kDa	100	6	6	8	31.3
Myofilaments
Myosin heavy chain CG17927-PA, isoform A [Drosophila melanogaster]	gi|24584704 (+1)	225 kDa	100	128	186	2330	54.9
bent CG32019-PA, isoform A [Drosophila melanogaster]	gi|28558739 (+1)	1001 kDa	100	118	128	787	19.2
sallimus CG1915-PC, isoform C [Drosophila melanogaster]	gi|161080703	2066 kDa	100	83	86	363	6.14
Paramyosin CG5939-PA, isoform A [Drosophila melanogaster]	gi|24661112 (+1)	102 kDa	100	39	51	578	49.4
Tropomyosin 1 CG4898-PD, isoform D [Drosophila melanogaster]	gi|24647073 (+2)	33 kDa	100	22	29	116	55.1
Tropomyosin 2 CG4843-PB, isoform B [Drosophila melanogaster]	gi|24647095 (+1)	33 kDa	100	21	29	131	56.7
upheld CG7107-PF, isoform F [Drosophila melanogaster]	gi|62473664	47 kDa	100	17	23	236	40.5
Actin 87E CG18290-PA, isoform A [Drosophila melanogaster]	gi|17137090 (+1)	42 kDa	100	15	24	417	42.3
Myosin light chain 2 CG2184-PA, isoform A [Drosophila melanogaster]	gi|17933672	24 kDa	100	11	15	196	51.8
Zeelin1 CG6803-PB, isoform B [Drosophila melanogaster]	gi|21357797	42 kDa	100	13	14	71	40.5
wings up A CG7178-PA, isoform A [Drosophila melanogaster]	gi|24642961	24 kDa	100	9	11	39	33.7
Stretchin-Mlck CG18255-PA, isoform A [Drosophila melanogaster]	gi|24653966	1037 kDa	100	7	7	9	0.831
Basal Lamina
terribly reduced optic lobes CG33950-PF, isoform F [Drosophila melanogaster]	gi|78706474	513 kDa	100	89	107	871	23.7
Papilin CG33103-PA, isoform A [Drosophila melanogaster]	gi|28572036	313 kDa	100	51	58	438	22.8
Laminin A CG10236-PA [Drosophila melanogaster]	gi|17136292	411 kDa	100	44	48	274	16
Laminin B2 CG3322-PA [Drosophila melanogaster]	gi|17737557	182 kDa	100	30	31	130	24.1
Laminin B1 CG7123-PA, isoform A [Drosophila melanogaster]	gi|17136294 (+1)	198 kDa	100	23	25	131	16.3
viking CG16858-PA [Drosophila melanogaster]	gi|17137252	194 kDa	100	18	19	190	10.3
Lamin C CG10119-PA [Drosophila melanogaster]	gi|24653664	70 kDa	100	17	18	59	33
pericardin CG5700-PB [Drosophila melanogaster]	gi|24663043	163 kDa	100	14	18	215	11.4
Glutactin CG9280-PA, isoform A [Drosophila melanogaster]	gi|17137794 (+2)	119 kDa	100	15	16	148	19.1
Collagen type IV CG4145-PA, isoform A [Drosophila melanogaster]	gi|24581820 (+2)	174 kDa	100	8	9	103	5.85
Nidogen/entactin CG12908-PA, isoform A [Drosophila melanogaster]	gi|24652408 (+1)	149 kDa	100	12	12	41	10.1
Imaginal disc growth factor 4 CG1780-PA, isoform A [Drosophila melanogaster]	gi|24640905 (+1)	49 kDa	100	7	8	21	22.2
myospheroid CG1560-PA [Drosophila melanogaster]	gi|24640486	93 kDa	100	7	7	17	12.2
inflated CG9623-PB, isoform B [Drosophila melanogaster]	gi|24642641	154 kDa	100	7	8	16	6.23
Tetraspanin 96F CG6120-PA [Drosophila melanogaster]	gi|17738195	30 kDa	100	7	7	11	27.2
neuromusculin CG8779-PB, isoform B [Drosophila melanogaster]	gi|116007846 (+1)	116 kDa	100	6	6	10	7.34
Cytostructural & Actin-binding
zormin CG33484-PD, isoform D [Drosophila melanogaster]	gi|116007762	411 kDa	100	35	37	226	13.1
alpha actinin CG4376-PC, isoform C [Drosophila melanogaster]	gi|17137758	106 kDa	100	31	34	241	38.1
Clathrin heavy chain CG9012-PE, isoform E [Drosophila melanogaster]	gi|161077848 (+5)	191 kDa	100	27	27	138	19.6
alpha Spectrin CG1977-PA [Drosophila melanogaster]	gi|17136504	278 kDa	100	40	44	127	20.7
Muscle-specific protein 300 CG33715-PD, isoform D [Drosophila melanogaster]	gi|161076705	1405 kDa	100	45	45	109	4.78
rhea CG6831-PA [Drosophila melanogaster]	gi|21355751	307 kDa	100	28	28	106	14.6
CG30084 CG30084-PF, isoform F [Drosophila melanogaster]	gi|161077121 (+1)	238 kDa	100	12	13	100	14.2
beta Spectrin CG5870-PA [Drosophila melanogaster]	gi|17647191	266 kDa	100	23	25	77	13.8
Vinculin CG3299-PA [Drosophila melanogaster]	gi|17136646	106 kDa	100	17	18	99	22.3
alpha-Tubulin at 84B CG1913-PA [Drosophila melanogaster]	gi|17136564 (+2)	50 kDa	100	10	11	84	28.7
Annexin IX CG5730-PB, isoform B [Drosophila melanogaster]	gi|17136264 (+3)	36 kDa	100	11	14	61	32.7
beta-Tubulin at 56D CG9277-PB, isoform B [Drosophila melanogaster]	gi|24655737	50 kDa	100	7	7	50	20.1
Muscle LIM protein at 84B CG1019-PA, isoform A [Drosophila melanogaster]	gi|17137134 (+1)	54 kDa	100	9	9	43	23
coracle CG11949-PA, isoform A [Drosophila melanogaster]	gi|24655527	184 kDa	100	8	10	43	7.3
alpha-Adaptin CG4260-PA, isoform A [Drosophila melanogaster]	gi|28574818 (+1)	106 kDa	100	9	9	35	9.87
CG6416 CG6416-PB, isoform B [Drosophila melanogaster]	gi|45550577	33 kDa	100	8	9	33	33.9
hu li tai shao CG9325-PA, isoform A [Drosophila melanogaster]	gi|17136738 (+4)	128 kDa	100	7	7	30	15.4
Annexin X CG9579-PA [Drosophila melanogaster]	gi|17136288	36 kDa	100	8	8	21	29.7
TER94 CG2331-PA, isoform A [Drosophila melanogaster]	gi|17137560	89 kDa	100	8	8	19	15.1
Beta Adaptin CG12532-PA [Drosophila melanogaster]	gi|17647183	101 kDa	100	6	6	19	8.14
AP-50 CG7057-PA, isoform A [Drosophila melanogaster]	gi|24649014 (+1)	50 kDa	100	7	7	18	22
Rab-protein 1 CG3320-PA, isoform A [Drosophila melanogaster]	gi|24648682	23 kDa	100	6	7	16	34.6
zipper CG15792-PA, isoform A [Drosophila melanogaster]	gi|24762816 (+3)	237 kDa	100	6	6	10	4.46
beta-Tubulin at 97EF CG4869-PA [Drosophila melanogaster]	gi|24650776	59 kDa	100	5	5	8	14.9
Protein Synthesis & Metabolism
Arginine kinase CG32031-PA, isoform A [Drosophila melanogaster]	gi|24661336 (+1)	61 kDa	100	19	24	143	50.2
CG7910 CG7910-PA [Drosophila melanogaster]	gi|24644968	58 kDa	100	10	10	90	21.1
Elongation factor 1alpha48D CG8280-PA, isoform A [Drosophila melanogaster]	gi|17137572 (+1)	50 kDa	100	7	9	89	16.8
Ribosomal protein S3 CG6779-PA [Drosophila melanogaster]	gi|17136324	27 kDa	100	15	16	63	64.2
Ef1gamma CG11901-PA, isoform A [Drosophila melanogaster]	gi|24651001 (+1)	49 kDa	100	9	12	57	22.7
Ribosomal protein S16 CG4046-PA [Drosophila melanogaster]	gi|19922746	17 kDa	100	8	8	48	43.9
Ribosomal protein LP0 CG7490-PA [Drosophila melanogaster]	gi|17737731	34 kDa	100	9	9	43	34.7
Ribosomal protein S4 CG11276-PA, isoform A [Drosophila melanogaster]	gi|24663668 (+1)	29 kDa	100	9	10	37	34.5
Ribosomal protein S9 CG3395-PA, isoform A [Drosophila melanogaster]	gi|24661707 (+1)	23 kDa	100	11	11	34	48.2
Ribosomal protein L5 CG17489-PA, isoform A [Drosophila melanogaster]	gi|116007382 (+2)	34 kDa	100	7	11	33	20.9
Ribosomal protein S3A CG2168-PA, isoform A [Drosophila melanogaster]	gi|17864162	30 kDa	100	7	8	33	27.6
Elongation factor 2b CG2238-PA, isoform A [Drosophila melanogaster]	gi|24585709	94 kDa	100	7	7	30	9.48
Ribosomal protein S18 CG8900-PA, isoform A [Drosophila melanogaster]	gi|17136882 (+1)	18 kDa	100	7	7	30	44.7
Ribosomal protein L13 CG4651-PA, isoform A [Drosophila melanogaster]	gi|17647879 (+1)	25 kDa	100	6	6	21	23.9
Ribosomal protein L4 CG5502-PA [Drosophila melanogaster]	gi|24650747	45 kDa	100	9	9	19	22.9
Ribosomal protein L26 CG6846-PA [Drosophila melanogaster]	gi|21357853	17 kDa	100	7	8	18	40.9
stubarista CG14792-PA, isoform A [Drosophila melanogaster]	gi|17136518 (+2)	30 kDa	100	7	8	30	22.4
string of pearls CG5920-PA [Drosophila melanogaster]	gi|17136734	29 kDa	100	6	6	30	25.1
CG5840 CG5840-PA, isoform A [Drosophila melanogaster]	gi|21358587	28 kDa	100	6	7	28	26.4
CG1640 CG1640-PA, isoform A [Drosophila melanogaster]	gi|24641760 (+5)	63 kDa	100	8	8	25	17
Ion Transport
Calcium ATPase at 60A CG3725-PA, isoform A [Drosophila melanogaster]	gi|17136664 (+7)	110 kDa	100	34	42	581	34
Na pump alpha subunit CG5670-PA, isoform A [Drosophila melanogaster]	gi|24648576 (+6)	116 kDa	100	24	29	209	30.6
CG2165 CG2165-PE, isoform E [Drosophila melanogaster]	gi|62473099 (+4)	116 kDa	100	7	7	35	8.5
Ryanodine receptor 44F CG10844-PA, isoform A [Drosophila melanogaster]	gi|17352465 (+3)	581 kDa	100	6	6	11	1.62
Heat Shock/Folding
Glycoprotein 93 CG5520-PA [Drosophila melanogaster]	gi|21357739	90 kDa	100	12	15	116	19.6
Heat shock protein cognate 3 CG4147-PA, isoform A [Drosophila melanogaster]	gi|24641402 (+3)	72 kDa	100	17	21	185	31.4
Heat shock protein cognate 4 CG4264-PA, isoform A [Drosophila melanogaster]	gi|17737967 (+5)	71 kDa	100	13	15	105	30.4
CG2852 CG2852-PA, isoform A [Drosophila melanogaster]	gi|20130249	22 kDa	100	7	7	39	37.6
Heat shock protein cognate 5 CG8542-PA [Drosophila melanogaster]	gi|24653595	74 kDa	100	9	9	38	19.1
Heat shock protein 83 CG1242-PA [Drosophila melanogaster]	gi|17647529	82 kDa	100	7	7	38	12
CG2918 CG2918-PA [Drosophila melanogaster]	gi|20128923	103 kDa	100	7	7	26	9.32
Cyclophilin 1 CG9916-PA [Drosophila melanogaster]	gi|45549139	25 kDa	100	7	7	25	25.1
CG14207 CG14207-PB, isoform B [Drosophila melanogaster]	gi|24643312	22 kDa	100	5	6	22	35.9
Carbohydrate Metabolism
UGP CG4347-PA, isoform A [Drosophila melanogaster]	gi|62484278 (+1)	59 kDa	100	7	8	69	17
CG6206 CG6206-PA, isoform A [Drosophila melanogaster]	gi|19921088	123 kDa	100	16	18	68	18.1
Glyceraldehyde 3 phosphate dehydrogenase 1 CG12055-PA, isoform A [Drosophila melanogaster]	gi|22023983 (+1)	35 kDa	100	8	9	67	27.4
Aldolase CG6058-PF, isoform F [Drosophila melanogaster]	gi|24650276 (+7)	43 kDa	100	14	14	57	46.8
Ect3 CG3132-PA [Drosophila melanogaster]	gi|24646169	72 kDa	100	8	8	41	15.1
Glycogenin CG9480-PA, isoform A [Drosophila melanogaster]	gi|45550476	49 kDa	100	10	10	39	35.3
Hexosaminidase 2 CG1787-PA [Drosophila melanogaster]	gi|17933586	71 kDa	100	6	7	29	10.5
Pyruvate kinase CG7070-PB, isoform B [Drosophila melanogaster]	gi|24648964 (+1)	55 kDa	100	10	12	38	22.3
Glycogen phosphorylase CG7254-PA, isoform A [Drosophila melanogaster]	gi|24581010 (+1)	97 kDa	100	9	9	38	13.6
CG1444 CG1444-PA [Drosophila melanogaster]	gi|24640442	35 kDa	100	5	5	33	21.2
CG6904 CG6904-PA, isoform A [Drosophila melanogaster]	gi|45551893	82 kDa	100	6	6	27	11.3
Trehalose-6-phosphate synthase 1 CG4104-PA [Drosophila melanogaster]	gi|19920676	91 kDa	100	7	7	24	11.4
Tpi CG2171-PA, isoform A [Drosophila melanogaster]	gi|28572004	38 kDa	100	7	7	22	23.3
CG10924 CG10924-PA, isoform A [Drosophila melanogaster]	gi|24655082	71 kDa	100	8	8	21	15.4
CG16965 CG16965-PA [Drosophila melanogaster]	gi|24583760	78 kDa	100	5	5	21	8.12
Redox
lethal (2) 01289 CG9432-PD, isoform D [Drosophila melanogaster]	gi|116007558 (+1)	212 kDa	100	12	12	102	8.89
Catalase CG6871-PA [Drosophila melanogaster]	gi|17981717	57 kDa	100	10	11	74	26.3
Protein disulfide isomerase CG6988-PA, isoform A [Drosophila melanogaster]	gi|17647799	56 kDa	100	15	16	73	34.1
ERp60 CG8983-PA, isoform A [Drosophila melanogaster]	gi|45551086	55 kDa	100	11	12	72	28
PHGPx CG12013-PB, isoform B [Drosophila melanogaster]	gi|21356883 (+3)	19 kDa	100	6	7	55	27.7
thioredoxin peroxidase 1 CG1633-PA, isoform A [Drosophila melanogaster]	gi|17157991 (+1)	22 kDa	100	6	6	24	30.4
Peroxiredoxin 5037 CG5826-PA [Drosophila melanogaster]	gi|17738015	26 kDa	100	6	6	23	25.6
Proteolysis
Cysteine proteinase-1 CG6692-PC, isoform C [Drosophila melanogaster]	gi|24653514 (+2)	42 kDa	100	8	8	104	28.2
CG32092 CG32092-PB [Drosophila melanogaster]	gi|24662922	283 kDa	100	18	19	88	8.09
26-29kD-proteinase CG8947-PA [Drosophila melanogaster]	gi|20428641	62 kDa	100	9	10	83	15.7
CG3074 CG3074-PA, isoform A [Drosophila melanogaster]	gi|24657813 (+1)	49 kDa	100	8	13	44	21.3
cathD CG1548-PA [Drosophila melanogaster]	gi|21355083	42 kDa	100	8	9	32	29.3
Endoplasmic Reticulum
Cytochrome P450 reductase CG11567-PA, isoform A [Drosophila melanogaster]	gi|17137192	76 kDa	100	18	20	177	32.1
Rtnl1 CG33113-PF, isoform F [Drosophila melanogaster]	gi|28574660	64 kDa	100	8	8	56	18.5
CG13887 CG13887-PB, isoform B [Drosophila melanogaster]	gi|19923024 (+1)	26 kDa	100	5	5	17	19.3
Calreticulin CG9429-PA [Drosophila melanogaster]	gi|24645441	47 kDa	100	7	8	15	25.1
CaBP1 CG5809-PA [Drosophila melanogaster]	gi|19921434	47 kDa	100	6	6	15	14.5
CG1371 CG1371-PA [Drosophila melanogaster]	gi|20129847	131 kDa	100	6	6	13	6.51
Lipid Metabolism (non-mitochondrial)
Cytochrome P450-4g1 CG3972-PA [Drosophila melanogaster]	gi|17933498	63 kDa	100	24	31	601	39
Fat body protein 1 CG17285-PA, isoform A [Drosophila melanogaster]	gi|24664081 (+1)	120 kDa	100	22	30	257	25.2
CG3523 CG3523-PA [Drosophila melanogaster]	gi|19920632	266 kDa	100	22	22	105	12.1
CG7920 CG7920-PA, isoform A [Drosophila melanogaster]	gi|21358615	52 kDa	100	10	12	100	26.2
CG11198 CG11198-PC, isoform C [Drosophila melanogaster]	gi|161076407 (+3)	262 kDa	100	20	20	52	10.5
v(2)k05816 CG3524-PA [Drosophila melanogaster]	gi|24581345	266 kDa	100	13	13	30	7.93
Glycerol 3 phosphate dehydrogenase CG9042-PB, isoform B [Drosophila melanogaster]	gi|17136200 (+2)	39 kDa	100	6	7	16	21.4
CG17374 CG17374-PA [Drosophila melanogaster]	gi|62862516	255 kDa	100	6	6	17	3.24
Fatty acid (long chain) transport protein CG7400-PA, isoform A [Drosophila melanogaster]	gi|24583463 (+1)	70 kDa	100	6	6	9	11.2
Signaling
Unc-89 CG33519-PB, isoform B [Drosophila melanogaster]	gi|161077453 (+1)	469 kDa	100	22	22	65	7.44
14-3-3epsilon CG31196-PA, isoform A [Drosophila melanogaster]	gi|24647885 (+3)	30 kDa	100	7	8	30	28.1
Receptor of activated protein kinase C 1 CG7111-PA [Drosophila melanogaster]	gi|17137396	36 kDa	100	9	13	29	28
Vacuolar/Lysosomal
Vha68-2 CG3762-PA, isoform A [Drosophila melanogaster]	gi|24583984 (+2)	68 kDa	100	10	10	34	20.5
Vacuolar H[+]-ATPase 55kD B subunit CG17369-PB, isoform B [Drosophila melanogaster]	gi|17136796 (+1)	55 kDa	100	7	7	27	18.4
Vacuolar H[+]-ATPase 26kD E subunit CG1088-PB, isoform B [Drosophila melanogaster]	gi|17737775 (+1)	26 kDa	100	8	9	22	34.1
beta galactosidase CG9092-PA [Drosophila melanogaster]	gi|24582088	75 kDa	100	5	5	20	7.74
Vha100-1 CG1709-PE, isoform E [Drosophila melanogaster]	gi|21358171 (+6)	97 kDa	100	7	8	17	10.6
Assorted Other
CG32702 CG32702-PA [Drosophila melanogaster]	gi|24640838	411 kDa	100	55	57	276	17.5
Larval serum protein 1 gamma CG6821-PA [Drosophila melanogaster]	gi|17647601	93 kDa	100	24	29	120	31
fondue CG15825-PB, isoform B [Drosophila melanogaster]	gi|20129625	58 kDa	100	7	9	86	15.3
CG10097 CG10097-PB, isoform B [Drosophila melanogaster]	gi|78706758	57 kDa	100	11	14	80	27.1
CG3415 CG3415-PA [Drosophila melanogaster]	gi|18859837	64 kDa	100	16	18	76	32.8
Histone H4 replacement CG3379-PC, isoform C [Drosophila melanogaster]	gi|17975542 (+20)	11 kDa	100	6	7	72	57.3
Limpet CG32171-PB, isoform B [Drosophila melanogaster]	gi|21356031 (+3)	64 kDa	100	7	9	62	17.2
fau CG6544-PA, isoform A [Drosophila melanogaster]	gi|45550732	69 kDa	100	9	11	44	19.7
CG9297 CG9297-PA, isoform A [Drosophila melanogaster]	gi|28571703 (+1)	104 kDa	100	10	11	40	14.8
CG9066 CG9066-PA [Drosophila melanogaster]	gi|18859969	28 kDa	100	7	8	38	32.3
CG13091 CG13091-PA [Drosophila melanogaster]	gi|19920962	59 kDa	100	8	8	37	20.5
Tiggrin CG11527-PA [Drosophila melanogaster]	gi|17136984	257 kDa	100	20	20	36	10.7
Chorion protein 36 CG1478-PA [Drosophila melanogaster]	gi|17530857	30 kDa	100	7	8	33	32.7
flotillin 2 CG32593-PB, isoform B [Drosophila melanogaster]	gi|24642031 (+1)	47 kDa	100	11	11	32	33.9
midline fasciclin CG3359-PB, isoform B [Drosophila melanogaster]	gi|24646161 (+14)	91 kDa	100	11	11	29	15
ade5 CG3989-PA [Drosophila melanogaster]	gi|18860083	47 kDa	100	7	7	29	18.4
Esterase 6 CG6917-PA [Drosophila melanogaster]	gi|28574499	61 kDa	100	7	8	29	15.6
flotillin CG8200-PA, isoform A [Drosophila melanogaster]	gi|17137546	47 kDa	100	13	14	28	36.4
CG11592 CG11592-PA [Drosophila melanogaster]	gi|19920458	57 kDa	100	7	7	27	17.2
CG2233 CG2233-PA [Drosophila melanogaster]	gi|18921139	47 kDa	100	6	8	24	14
Alcohol dehydrogenase CG3481-PC, isoform C [Drosophila melanogaster]	gi|78706922 (+4)	28 kDa	100	5	8	24	27.7
Aldehyde dehydrogenase type III CG11140-PI, isoform I [Drosophila melanogaster]	gi|24586250 (+7)	56 kDa	100	6	6	23	15.3
CG3699 CG3699-PA [Drosophila melanogaster]	gi|23397609	26 kDa	100	6	6	23	29.9
growl CG14648-PB, isoform B [Drosophila melanogaster]	gi|161078016 (+1)	59 kDa	100	7	7	22	18.3
CG11151 CG11151-PA [Drosophila melanogaster]	gi|18859687	12 kDa	100	5	5	20	42.6
CG7356 CG7356-PB, isoform B [Drosophila melanogaster]	gi|24582659	87 kDa	100	9	9	19	14.5
CG6370 CG6370-PA [Drosophila melanogaster]	gi|19922486	69 kDa	100	6	6	19	13.7
Retinoid- and fatty-acid binding protein CG11064-PA [Drosophila melanogaster]	gi|24638795	373 kDa	100	8	8	17	3.34
alpha-Esterase-7 CG1112-PA, isoform A [Drosophila melanogaster]	gi|17737817	65 kDa	100	5	5	17	10.5
Putative Achaete Scute Target 1 CG6148-PA, isoform A [Drosophila melanogaster]	gi|24646379 (+1)	62 kDa	100	8	8	16	17.4
CG6643 CG6643-PA, isoform A [Drosophila melanogaster]	gi|24649705 (+1)	91 kDa	100	6	6	10	10
