# Supplementary material for: A Mighty Small Heart: The Cardiac Proteome of Adult Drosophila melanogaster
Source: PLoS One. 2011 Apr 25;6(4):e18497. doi: 10.1371/journal.pone.0018497 (PMC3081823; doi:10.1371/journal.pone.0018497)
Supplement: Table S14 — Drosophila Cardiac Peptidome Panel 1: Proteotypic peptides (as defined in the text) that unambiguously identify a specific protein isoform. Panel 2. Information-rich peptides (defined in text) that can be used to identify multiple protein isoforms. Panel 3. PeptideClassifier analysis of all 5169 unique (non-redundant) peptides. (XLSX) [file pone.0018497.s014.xlsx]

## Sheet: Proteotypic-Unambiguous Pept.
Peptide sequence	Implied protein(s) (CG identifier)	Peptide evidence class	Implied protein(s) (GI identifier)	Overlap with Brunner et al. (1= seen in both studies / 0= seen only in Foster et al.)	Total Observed Spectra
AAAPAAAPAAAAKPAAPAAAPAANGK	CG7178-PG	1a	gi|24642963	1	4
AAAPAAAPAPAAPK	CG5214-PA	1a	gi|24645909	1	48
AAAQQTFGGNTPAQTNDR	CG6151-PA	1a	gi|21358259	1	9
AADIVVDEIR	CG3415-PA	1a	gi|18859837	1	76
AADIVVDEIRK	CG3415-PA	1a	gi|18859837	1	76
AADLQQLQNGR	CG4598-PA	1a	gi|24583165	1	16
AADYLTEYNSGIK	CG1065-PA	1a	gi|28574296	1	99
AAEAAAALGFK	CG6000-PA	1a	gi|45550806	1	4
AAEGNDGPIVLGQSSEQQLDGAK	CG7654-PA	1a	gi|28574622	1	12
AAEIVKDDDPPIK	CG8983-PA	1a	gi|45551086	1	72
AAETAEAQASALTNAAGAAASAAK	CG6533-PA	1a	gi|17647279	0	14
AAEYNVR	CG5809-PA	1a	gi|19921434	0	15
AAFDSVGK	CG2184-PA	1a	gi|17933672	0	196
AAGNDNPFDMK	CG11015-PA	1a	gi|20129279	1	18
AAILESEGVR	CG2970-PA	1a	gi|45550506	1	4
AAIQVFNCPGDSGAR	CG3501-PA	1a	gi|19922774	1	6
AALDAAGLK	CG4600-PA	1a	gi|17648125	1	82
AALLNSK	CG7920-PA	1a	gi|21358615	1	100
AANNGAYPPDLSYIVSAR	CG4769-PA	1a	gi|24658292	1	37
AANQPESTIVVVGTVTDDAR	CG8615-PA	1a	gi|21357009	1	11
AAPAAAAAPAGPPKDPNDPK	CG7178-PG	1a	gi|24642963	1	4
AAPAEDEEEAAPK	CG5012-PA	1a	gi|17864338	1	5
AAPLVAAGPAIVK	CG2342-PA	1a	gi|21358149	1	5
AAPRPPPPAPVAALKPAVAQVK	CG5214-PA	1a	gi|24645909	1	48
AAPVAPIAPVALAAPAPIVR	CG1330-PA	1a	gi|21358141	1	13
AAQETVQELGSER	CG3603-PA	1a	gi|24639444	1	23
AAQGSALATEEVR	CG10119-PA	1a	gi|24653664	1	59
AAQIIEFIK	CG17524-PA	1a	gi|24654975	1	4
AASANWYGGDAR	CG4169-PA	1a	gi|24665395	1	151
AASTMFFGELLR	CG3944-PA	1a	gi|17864306	1	8
AASTPAAAPPAK	CG7434-PA	1a	gi|17137152	1	17
AASTQAGTPAPPSK	CG7445-PA	1a	gi|17737667	1	10
AATAYSGIVEAVEAAQK	CG10236-PA	1a	gi|17136292	1	274
AATWALDR	CG7470-PA	1a	gi|21357643	1	101
AAVAAPVVR	CG2342-PA	1a	gi|21358149	1	5
AAVEGMPDIK	CG11258-PA	1a	gi|17647671	0	4
AAVENPAIIVAGL	CG5214-PA	1a	gi|24645909	1	48
AAVVGMTLPIAR	CG7113-PA	1a	gi|17737361	1	94
AAYADFYSK	CG14028-PA	1a	gi|24581914	1	35
ADAVYSGPALTDESDR	CG5700-PB	1a	gi|24663043	0	215
ADAVYSGPALTDESDRVPEAQLK	CG5700-PB	1a	gi|24663043	1	215
ADKDTSNGLLFFYGR	CG10236-PA	1a	gi|17136292	0	274
ADLEETGR	CG3612-PA	1a	gi|24658560	1	476
ADLSVFDALGK	CG6341-PA	1a	gi|45549259	1	3
ADQSAVTASSGSGTSSPPAGQPPLK	CG13865-PA	1a	gi|116007256	1	9
ADSVVAGTPANEEAAPEEVEEIK	CG7445-PA	1a	gi|17737667	1	10
ADVISHCAIDPENR	CG9379-PA	1a	gi|21355865	0	4
ADYELVPQDQEAK	CG13037-PA	1a	gi|24665233	1	12
AEASVEHILAR	CG3999-PA	1a	gi|24645648	1	1
AECTAEDAYK	CG5889-PA	1a	gi|21356279	1	9
AEEEDAEEECDILGNK	CG5482-PA	1a	gi|19922556	1	13
AEEIEGGASVPATSDNSSQDEHISSR	CG10610-PA	1a	gi|24644458	1	3
AEFTITIK	CG31233-PA	1a	gi|28571792	0	1
AEIQQLCDEVER	CG3299-PA	1a	gi|17136646	1	99
AEISNTTNGQVFR	CG3989-PA	1a	gi|18860083	1	29
AEITQIQDSQAMIR	CG6750-PA	1a	gi|24583513	1	6
AELNEFLTR	CG6779-PA	1a	gi|17136324	1	63
AEQQQLEDIELLER	CG3322-PA	1a	gi|17737557	1	130
AESLLTR	CG5676-PA	1a	gi|24583291	0	5
AFAGAISK	CG7580-PA	1a	gi|21355243	0	6
AFEDYVGLLGEK	CG3887-PA	1a	gi|19920720	1	4
AFPLADAQLTAK	CG3949-PA	1a	gi|17864298	1	12
AFQAEELGNDLDIK	CG12918-PA	1a	gi|20129845	1	7
AFSPTTVTTGR	CG9539-PA	1a	gi|19920826	1	8
AFTGFIVER	CG12262-PA	1a	gi|24660351	1	112
AGAGSATLSMAYAGAR	CG7998-PA	1a	gi|24647881	1	156
AGDVIQCGMADLAK	CG5793-PA	1a	gi|28571789	1	14
AGGEAVADYNSVIDGAK	CG3415-PA	1a	gi|18859837	1	76
AGGEVLTFDQLALR	CG8615-PA	1a	gi|21357009	1	11
AGGSLGLMQPGGDTEELLEK	CG7523-PA	1a	gi|24647735	1	1
AGLSMQVVR	CG4494-PA	1a	gi|17137634	1	4
AGRNQKRPR	CG31132-PA	1a	gi|24649631	0	2
AGSFQLNYR	CG32702-PA	1a	gi|24640838	0	276
AGSPSPTPVK	CG6803-PB	1a	gi|21357797	0	71
AGVYDPK	CG7998-PA	1a	gi|24647881	0	156
AHGGYSVFAGVGER	CG11154-PA	1a	gi|24638766	1	585
AHLADTGSTDLLQR	CG10236-PA	1a	gi|17136292	1	274
AIAEAALAEVK	CG5809-PA	1a	gi|19921434	1	15
AIAELGIYPAVDPLDSTSR	CG11154-PA	1a	gi|24638766	1	585
AIATTYLDDLSR	CG17374-PA	1a	gi|62862516	0	17
AICSADAAAGVETCR	CG5009-PA	1a	gi|24654595	1	7
AIDFAEQYK	CG32702-PA	1a	gi|24640838	0	276
AIFGDNMLR	CG3972-PA	1a	gi|17933498	1	601
AIFTTQVTSK	CG11137-PA	1a	gi|24668758	1	5
AIGTDEDLAHSSIR	CG12264-PA	1a	gi|20129463	1	3
AIISADELAK	CG1977-PA	1a	gi|17136504	1	127
AILGTLPTDEQGK	CG4904-PA	1a	gi|17737405	1	12
AILSHVAPATEVGK	CG30344-PA	1a	gi|24652011	1	2
AINEGGFQSLPQK	CG12140-PA	1a	gi|24652256	1	51
AIVEEISTPVASTPASK	CG3972-PA	1a	gi|17933498	1	601
AIVGASLAEILAK	CG9282-PA	1a	gi|19921254	1	7
AIVNVSDFTEEVK	CG33101-PA	1a	gi|28573010	1	1
ALAEDVILR	CG17560-PA	1a	gi|24647494	0	24
ALAGCDLLTISPALLK	CG2827-PA	1a	gi|45549185	1	2
ALANAEELENPSK	CG9416-PA	1a	gi|28573701	0	2
ALDIFATK	CG1977-PA	1a	gi|17136504	1	127
ALDPLLAR	CG9092-PA	1a	gi|24582088	0	20
ALDSDWFCK	CG4581-PA	1a	gi|17137578	1	55
ALDSTNCTEHEK	CG33149-PA	1a	gi|28573630	1	5
ALEGINVK	CG4087-PA	1a	gi|17136320	1	15
ALELHAPK	CG5700-PB	1a	gi|24663043	0	215
ALENLEAVLK	CG15261-PA	1a	gi|19921376	1	10
ALGPDATNLSLVK	CG3523-PA	1a	gi|19920632	1	105
ALGQNPTESDVK	CG3201-PA	1a	gi|17530801	1	5
ALLWDLNDGK	CG7111-PA	1a	gi|17137396	1	29
ALNNFITLK	CG3989-PA	1a	gi|18860083	1	29
ALNVTSVTGQVVAGR	CG8066-PA	1a	gi|24646857	1	1
ALQEQQQELAR	CG33715-PD	1a	gi|161076705	0	109
ALQPTVTDIPSATQLSK	CG6831-PA	1a	gi|21355751	1	106
ALQTVPNIEK	CG3322-PA	1a	gi|17737557	0	130
ALSNLADVEEK	CG2774-PA	1a	gi|24581429	1	2
ALSSCCPVTGDVYR	CG6871-PA	1a	gi|17981717	1	74
ALTGGIAMLFK	CG7430-PA	1a	gi|21358499	1	34
ALTIQASDR	CG7461-PA	1a	gi|24655582	1	96
ALTLGDNVLSVSQPR	CG2050-PA	1a	gi|24651794	1	11
ALTNYLNTEPFTTFSEETSR	CG6544-PA	1a	gi|45550732	1	44
ALTVAELTQQMFDAK	CG4869-PA	1a	gi|24650776	1	8
ALVAFYQK	CG4046-PA	1a	gi|19922746	1	48
ALVYEVVANR	CG16965-PA	1a	gi|24583760	0	21
ALYENESANEAALSK	CG10672-PA	1a	gi|21355319	1	22
ALYLGDNDFEYIPK	CG9031-PA	1a	gi|45550188	1	15
AMDGGADVKPAAAAPAAAAGVPEANITSGGSSR	CG3523-PA	1a	gi|19920632	1	105
AMQDSFTSAIIPLSTDR	CG1635-PA	1a	gi|28571955	0	4
ANDVVYVEDK	CG1665-PA	1a	gi|45550400	1	1
ANNSEYGLAAAVFTK	CG3752-PA	1a	gi|20129399	1	178
ANNVDFMDAEALK	CG7283-PA	1a	gi|24662946	1	26
ANNVDFMDAEALKK	CG7283-PA	1a	gi|24662946	1	26
ANQDSDTESPSVSYTPSPAK	CG33113-PF	1a	gi|28574660	1	56
ANSELESDAK	CG10236-PA	1a	gi|17136292	0	274
ANSLENPNAEFR	CG8453-PA	1a	gi|24652913	0	2
ANTPATSSAGPVLR	CG14028-PA	1a	gi|24581914	0	35
ANYIVGGLR	CG3752-PA	1a	gi|20129399	1	178
APDSYVTVTK	CG5700-PB	1a	gi|24663043	0	215
APEEQPTDFTFATK	CG1915-PC	1a	gi|161080703	0	363
APGAPGEEEVGHTK	CG3564-PA	1a	gi|18921123	1	8
APGFAHLAALEK	CG1970-PA	1a	gi|24638644	1	45
APGIIPR	CG3612-PA	1a	gi|24658560	0	476
APIQELGSDLR	CG6831-PA	1a	gi|21355751	1	106
APIQIITGSAGCK	CG1637-PC	1a	gi|20129007	1	9
APIRPDVVNEVHQLLR	CG5502-PA	1a	gi|24650747	1	19
APIVEMFEAEGSPYYSTAR	CG3267-PA	1a	gi|24586065	1	5
APLPLNYNPLLVMK	CG2107-PA	1a	gi|24656312	1	11
APPPPPEDDGYR	CG7445-PA	1a	gi|17737667	1	10
APQDGDVVELVR	CG7910-PA	1a	gi|24644968	0	90
APQPPSSWQGVR	CG6018-PA	1a	gi|24658187	0	1
APSVQEPLQDVVSELDK	CG1915-PC	1a	gi|161080703	0	363
APTIAAPVVEPKPEPPKPK	CG33113-PF	1a	gi|28574660	1	56
APVAQNSSAMLTDMVK	CG6750-PA	1a	gi|24583513	1	6
AQAPAQLGLTFR	CG4204-PA	1a	gi|17738069	1	1
AQDLAAQYTDMTASAEPAIK	CG10236-PA	1a	gi|17136292	1	274
AQDVSLQLTYPENGK	CG15043-PA	1a	gi|24643050	0	6
AQDVTLESAITK	CG9006-PA	1a	gi|24652780	1	3
AQEIAQENR	CG3267-PA	1a	gi|24586065	1	5
AQFVSAENYQNFE	CG8602-PA	1a	gi|21356765	1	6
AQGDFNEFIEK	CG11051-PA	1a	gi|21358539	1	7
AQGESAAGEDADIVISGLSGK	CG3524-PA	1a	gi|24581345	1	30
AQLEYHLEAER	CG6455-PA	1a	gi|45549224	1	49
AQSDSTAVAASR	CG5870-PA	1a	gi|17647191	1	77
AQYEEQMQINR	CG6944-PA	1a	gi|17136290	1	15
AQYFIK	CG7490-PA	1a	gi|17737731	0	43
AQYLQSVEDR	CG3283-PA	1a	gi|17137106	1	39
AQYPEYFAK	CG9306-PA	1a	gi|19921244	1	17
ASAVNTLADLLVSR	CG7470-PA	1a	gi|21357643	1	101
ASDIQLEFVR	CG9022-PA	1a	gi|24640745	1	15
ASDKDDEDEDDDDEEKDDESK	CG9429-PA	1a	gi|24645441	1	15
ASDPIQQLFLDK	CG4412-PA	1a	gi|17137260	1	2
ASENESFMANIFR	CG7461-PA	1a	gi|24655582	1	96
ASGTCQLTFDNVR	CG3902-PA	1a	gi|24666513	1	54
ASNTAEVYFEDVK	CG7461-PA	1a	gi|24655582	1	96
ASPQVAGSYLCK	CG3624-PA	1a	gi|19922742	0	19
ASPVELLSLSNPVFK	CG1742-PA	1a	gi|24643618	0	34
ASQIAPVHGTPYLR	CG32092-PB	1a	gi|24662922	0	88
ASQYQITVEELR	CG11527-PA	1a	gi|17136984	1	36
ASSDYSYTSK	CG6544-PC	1a	gi|24645757	0	39
ASSQSGGIIQQSQSEVHANDK	CG5700-PB	1a	gi|24663043	1	215
ASTSTPVGGASTSSR	CG10119-PA	1a	gi|24653664	0	59
ASVFAPSPETYVR	CG1444-PA	1a	gi|24640442	1	33
ATDAYNFYTTGQAK	CG8443-PA	1a	gi|20130037	1	6
ATELILK	CG33715-PD	1a	gi|161076705	0	109
ATESSPEVEK	CG6155-PA	1a	gi|24653432	1	8
ATIGADFCTK	CG5915-PA	1a	gi|17865835	1	9
ATINMLR	CG4897-PA	1a	gi|24583248	1	13
ATNLIISSLR	CG2107-PA	1a	gi|24656312	0	11
ATSPDSSDVIIAR	CG8505-PA	1a	gi|28573391	1	6
ATTEECIGPK	CG2520-PA	1a	gi|24644772	0	11
ATVDMQQK	CG15168-PA	1a	gi|19921518	0	1
AVAATSNDPQR	CG14981-PA	1a	gi|17647639	1	16
AVAATSNDPQRENYDDEPDETASER	CG14981-PA	1a	gi|17647639	1	16
AVADQAGIVGHYVETAK	CG5903-PA	1a	gi|21357927	1	16
AVANTTAALVLR	CG6831-PA	1a	gi|21355751	1	106
AVATDEASEGVDLLR	CG4586-PA	1a	gi|24640268	0	1
AVDCDSVPKPNTMEQLQPVTR	CG6579-PA	1a	gi|24583867	1	12
AVDSLVPIGR	CG3612-PA	1a	gi|24658560	1	476
AVENGENSLWTTLK	CG6455-PA	1a	gi|45549224	1	49
AVEQGDNTLK	CG3322-PA	1a	gi|17737557	0	130
AVGQDLGQSGSCMMR	CG16858-PA	1a	gi|17137252	1	190
AVIDPQSISDPQVIK	CG32528-PA	1a	gi|24643390	1	2
AVLAQFADNNPALFK	CG3415-PA	1a	gi|18859837	1	76
AVLIDLEPGTMDSVR	CG4869-PA	1a	gi|24650776	1	8
AVLVDESTSKPLAVHQAFVR	CG6370-PA	1a	gi|19922486	1	19
AVNGVFLYK	CG11151-PA	1a	gi|18859687	1	20
AVNLNLPTAQHELNMTK	CG7461-PA	1a	gi|24655582	1	96
AVNPDVEFYESK	CG7917-PA	1a	gi|17738283	1	19
AVNSLCEVCNEASNDPK	CG6831-PA	1a	gi|21355751	1	106
AVPLALGLISASNPK	CG7762-PA	1a	gi|21356859	1	2
AVSVASDTFISAAER	CG4097-PA	1a	gi|17737605	1	3
AVVAVAGQGAAASNHK	CG4169-PA	1a	gi|24665395	1	151
AVVDESEDHSVADYYVSASAK	CG6944-PA	1a	gi|17136290	1	15
AVVGTDGEEIVK	CG7008-PA	1a	gi|20130403	1	7
AVVLVEQPEQR	CG3940-PA	1a	gi|24645604	1	1
AVVTELEEAIAK	CG12918-PA	1a	gi|20129845	1	7
AVYEAEFER	CG9579-PA	1a	gi|17136288	1	21
AYEGPAQGIK	CG11151-PA	1a	gi|18859687	1	20
AYEVLSDPQQR	CG8531-PA	1a	gi|19922238	1	1
AYVSPPEYSK	CG6524-PA	1a	gi|17986137	0	14
CADHYQIDVGDVK	CG10157-PA	1a	gi|21355397	1	4
CCGADGPGDWATSR	CG6120-PA	1a	gi|17738195	0	11
CFIVGADNVGSK	CG7490-PA	1a	gi|17737731	1	43
CFQNECLMQIESDQR	CG7596-PA	1a	gi|17738017	0	42
CGYTGEDGVEISVASSQAQK	CG6415-PA	1a	gi|20129441	1	10
CIEQATEHANNR	CG7461-PA	1a	gi|24655582	1	96
CLDEALK	CG12262-PA	1a	gi|24660351	0	112
CLEAVGLDPDMYR	CG17927-PK	1a	gi|24584712	1	1
CLEVGPQLFESMNK	CG2233-PA	1a	gi|18921139	1	24
CLNPYDLQR	CG7910-PA	1a	gi|24644968	0	90
CNAQLVESLQQK	CG30493-PB	1a	gi|24586344	1	1
CNIYYR	CG7596-PA	1a	gi|17738017	0	42
CNVNPAR	CG1475-PB	1a	gi|21357053	1	7
CQCKPGVTGDK	CG3322-PA	1a	gi|17737557	0	130
CSCYEAGTEQDEQSITR	CG3322-PA	1a	gi|17737557	1	130
CSLICDQGSELVEAK	CG1977-PA	1a	gi|17136504	1	127
CSSLPAK	CG4764-PA	1a	gi|19920498	0	18
CSSPELASNVVYK	CG9249-PA	1a	gi|24585589	1	2
CTAIEFDNNQFK	CG11064-PA	1a	gi|24638795	1	17
CVELCQPER	CG10924-PA	1a	gi|24655082	1	21
CVETLNNAADR	CG7350-PA	1a	gi|17737595	0	8
CVSTLLDLIQTK	CG12532-PA	1a	gi|17647183	1	19
CVVCETTTR	CG16858-PA	1a	gi|17137252	1	190
CYQCDSLTNSECGK	CG9338-PA	1a	gi|24585535	0	32
CYQCESLTMPK	CG9336-PA	1a	gi|24585531	1	6
DAAAAALSFK	CG16935-PA	1a	gi|45550423	0	24
DAAPFDASQDAQVLR	CG9579-PA	1a	gi|17136288	1	21
DAASNQLIDYK	CG6871-PA	1a	gi|17981717	1	74
DAAVIGKPDEEAGELPLAFVVK	CG6178-PA	1a	gi|21355181	1	15
DACGGQELESALEEVR	CG6831-PA	1a	gi|21355751	1	106
DACSICDK	CG13220-PA	1a	gi|20129879	1	6
DADAIVQQTLAK	CG3699-PA	1a	gi|23397609	1	23
DADEIENWIAEK	CG1977-PA	1a	gi|17136504	1	127
DADETVAWIAEK	CG1977-PA	1a	gi|17136504	1	127
DAEEVPMVLVGNK	CG9375-PA	1a	gi|17136430	1	3
DAEIDVPLVLAK	CG4954-PA	1a	gi|19922464	1	2
DAGNFLINGDLTLNQINQK	CG10236-PA	1a	gi|17136292	1	274
DAGQIAGLNVLR	CG8542-PA	1a	gi|24653595	1	38
DAIETLLSLGEAK	CG5434-PA	1a	gi|24648453	1	1
DAILDGTHPVTQDK	CG6831-PA	1a	gi|21355751	1	106
DALCQDLNGVLR	CG11720-PA	1a	gi|17737563	0	7
DALDYIDFTR	CG1977-PA	1a	gi|17136504	1	127
DALIEDQTAK	CG3523-PA	1a	gi|19920632	1	105
DALNELNSFNK	CG10236-PA	1a	gi|17136292	0	274
DALTVSNHK	CG32702-PA	1a	gi|24640838	0	276
DAPVVEKPGEELK	CG12935-PA	1a	gi|20129861	1	3
DASGYISSAELR	CG3201-PA	1a	gi|17530801	1	5
DASSDSGPDEQR	CG11771-PA	1a	gi|21356111	1	1
DATFQLDNLK	CG10302-PA	1a	gi|24584970	1	7
DAVSDLAQHFLDK	CG5525-PA	1a	gi|24583944	1	1
DAVVITEDQALK	CG13392-PA	1a	gi|24582811	1	1
DCEDSNPLIR	CG12532-PA	1a	gi|17647183	1	19
DCELAESWMSAR	CG1977-PA	1a	gi|17136504	1	127
DCGECQPGYFNIR	CG3322-PA	1a	gi|17737557	1	130
DCSCVICGPGGEPCPGCSAR	CG6132-PA	1a	gi|24662704	0	1
DCSLGGGGGPGGVGGGGGGGGGGMR	CG3800-PA	1a	gi|24658883	1	2
DCTFADTMEMK	CG3972-PA	1a	gi|17933498	1	601
DCYVGDEAQSK	CG7478-PA	1a	gi|17975540	1	4
DDANHDPQWSEEQIVSAK	CG3989-PA	1a	gi|18860083	1	29
DDCLYENEDVK	CG3560-PA	1a	gi|24642430	1	35
DDDESEASDFAGFDSKP	CG6983-PA	1a	gi|21355797	1	1
DDDLHNPLIQLENNK	CG32702-PA	1a	gi|24640838	0	276
DDDVICTTEYSK	CG10236-PA	1a	gi|17136292	1	274
DDEVQVIR	CG6846-PA	1a	gi|21357853	1	18
DDGYCVNCACDPVGSR	CG3322-PA	1a	gi|17737557	1	130
DDITNIPVK	CG32092-PB	1a	gi|24662922	0	88
DDLDDIDENDVGAK	CG3972-PA	1a	gi|17933498	1	601
DDLFDVIPEK	CG9099-PA	1a	gi|18859973	1	1
DDLFNVNAGIIK	CG7998-PA	1a	gi|24647881	1	156
DDRIPVDHNLALYEGPEQR	CG12140-PA	1a	gi|24652256	1	51
DDRIVIK	CG11330-PA	1a	gi|17647275	0	1
DDSCVNPLNLYVR	CG12840-PA	1a	gi|17737437	1	6
DDTPVNLEQAENQLK	CG5870-PA	1a	gi|17647191	1	77
DEDLYPNPETFDPER	CG9438-PA	1a	gi|17647305	1	2
DEDTNYGYPQK	CG7111-PA	1a	gi|17137396	1	29
DEIPDQYDWR	CG8947-PA	1a	gi|20428641	1	83
DEQFSLFLPK	CG8193-PA	1a	gi|19921864	1	1
DESFFEK	CG6666-PA	1a	gi|45550736	0	6
DFANNELSGNAAK	CG4703-PA	1a	gi|21356377	1	12
DFENAEDVNK	CG3911-PA	1a	gi|45550579	1	1
DFLIEQER	CG30498-PA	1a	gi|24586303	1	3
DFMIQGGDFTK	CG2852-PA	1a	gi|20130249	1	39
DFPGADVILGQLK	CG6415-PA	1a	gi|20129441	1	10
DFPGADVILGQLKEGVSRR	CG6415-PA	1a	gi|20129441	0	10
DGAISEASDAK	CG3612-PA	1a	gi|24658560	1	476
DGDALLYFVK	CG5554-PA	1a	gi|20130317	1	7
DGDTVKPGQALFK	CG5214-PA	1a	gi|24645909	1	48
DGGGTFADIIGR	CG32702-PA	1a	gi|24640838	1	276
DGIKDVISVR	CG2233-PA	1a	gi|18921139	1	24
DGINEFLR	CG5809-PA	1a	gi|19921434	1	15
DGISGSINEGFDR	CG12843-PA	1a	gi|24586157	0	2
DGIWLCK	CG5023-PA	1a	gi|21356183	0	8
DGLDTPVDVGQAK	CG9579-PA	1a	gi|17136288	1	21
DGNLTLGTGVVTSTLPPLTESQR	CG6050-PA	1a	gi|17864358	1	5
DGPDDTGNYYTRPGK	CG4769-PA	1a	gi|24658292	1	37
DGSILIEGCGK	CG15203-PA	1a	gi|24641174	0	2
DGTFDLDSASLFGCK	CG10236-PA	1a	gi|17136292	1	274
DGWLLVR	CG30483-PA	1a	gi|24653538	0	2
DIADEESWIK	CG1977-PA	1a	gi|17136504	1	127
DIDFFNDETK	CG6821-PA	1a	gi|17647601	1	120
DIGSSPELVR	CG30008-PA	1a	gi|24652244	0	19
DIITGDEMFADTYK	CG4800-PA	1a	gi|24645861	1	17
DILVQYDR	CG4046-PA	1a	gi|19922746	1	48
DINLVAISPLK	CG1371-PA	1a	gi|20129847	1	13
DIVEVPK	CG3944-PA	1a	gi|17864306	0	8
DKENFQNIR	CG9258-PA	1a	gi|17137210	1	7
DKIDSASNIR	CG6579-PA	1a	gi|24583867	0	12
DLAEANLPENR	CG1637-PC	1a	gi|20129007	1	9
DLASVQNLMK	CG1977-PA	1a	gi|17136504	1	127
DLDECQTNNGGCSLSPK	CG32702-PA	1a	gi|24640838	0	276
DLDFLQDPK	CG9688-PA	1a	gi|24651373	0	2
DLEDEAAWIR	CG1977-PA	1a	gi|17136504	1	127
DLEPISAASLAA	CG17331-PA	1a	gi|20129563	1	4
DLGEVGQAIAPGESSIDLK	CG7765-PA	1a	gi|17136240	1	4
DLGGQSTTQDFTR	CG6439-PA	1a	gi|24648872	1	38
DLGPQIGWK	CG10849-PA	1a	gi|24657023	1	63
DLIFPK	CG5903-PA	1a	gi|21357927	0	16
DLIGVQNLIK	CG1977-PA	1a	gi|17136504	1	127
DLIQSTEYPPSAESQAK	CG2109-PA	1a	gi|21357105	1	2
DLISNVLK	CG3523-PA	1a	gi|19920632	1	105
DLITNIGSGVGAAPAGGAAPAAAAAAPAAESK	CG4087-PA	1a	gi|17136320	1	15
DLLHPLPAEEK	CG10423-PA	1a	gi|24649976	1	11
DLLLIHEEGK	CG32702-PA	1a	gi|24640838	0	276
DLMQLEVFR	CG3524-PA	1a	gi|24581345	0	30
DLNAVVDGPFPEALDQAR	CG5112-PA	1a	gi|21356731	1	3
DLNDFGAVNEVYK	CG15261-PA	1a	gi|19921376	1	10
DLPAITDFINK	CG1837-PA	1a	gi|18859803	1	16
DLPGALDETGLIER	CG7891-PA	1a	gi|21355085	1	5
DLPLLLEIMAGDK	CG7910-PA	1a	gi|24644968	0	90
DLRDEEGYLR	CG8200-PA	1a	gi|17137546	1	28
DLSTVQTLLTK	CG1977-PA	1a	gi|17136504	1	127
DLSVVQNDLK	CG34445-PA	1a	gi|161077401	0	3
DLTALQATIR	CG4307-PA	1a	gi|24647054	1	64
DLTSVQNLQK	CG1977-PA	1a	gi|17136504	0	127
DLTVGGAVTQCYR	CG6510-PA	1a	gi|17647885	1	10
DLVPDMNNFYEQYR	CG3283-PA	1a	gi|17137106	1	39
DLYANNVLSGGTTMYPGIADR	CG7478-PA	1a	gi|17975540	1	4
DMQDILNDLK	CG5703-PA	1a	gi|18859877	1	37
DNDLLELPR	CG9031-PA	1a	gi|45550188	1	15
DNDNATINCAAR	CG5550-PA	1a	gi|24654259	0	9
DNECELSR	CG6120-PA	1a	gi|17738195	0	11
DNECTVTHSR	CG6579-PA	1a	gi|24583867	1	12
DNEIAIIGFFK	CG6988-PA	1a	gi|17647799	1	73
DNIFEEK	CG41128-PA	1a	gi|161076204	1	4
DNLKDNECELSR	CG6120-PA	1a	gi|17738195	1	11
DNPANFGYGCGR	CG14413-PA	1a	gi|17986025	1	3
DNPGVYSGQWQGR	CG9629-PA	1a	gi|24666674	1	21
DNSGDGGQTYAEVIDDLHK	CG3322-PA	1a	gi|17737557	1	130
DNTYMIGISDLAEK	CG7106-PA	1a	gi|21357549	1	1
DPAQTLGGDFNAAK	CG11661-PI	1a	gi|161084461	0	218
DPDTIISASR	CG7111-PA	1a	gi|17137396	1	29
DPDTLEAPDDFIDTINR	CG6042-PA	1a	gi|24648130	1	1
DPETTSVSNSPTGGVEEAK	CG8042-PA	1a	gi|21356345	1	4
DPFFYTFYK	CG6821-PA	1a	gi|17647601	1	120
DPFSVYR	CG3283-PA	1a	gi|17137106	1	39
DPIAGVVPLQPAPNR	CG3415-PA	1a	gi|18859837	1	76
DPILFPSFIHTQK	CG6871-PA	1a	gi|17981717	1	74
DPNEAIPESNPNDQTPTAGLK	CG4104-PA	1a	gi|19920676	1	24
DPNGLLFSVHGK	CG10236-PA	1a	gi|17136292	1	274
DPNTGVATTDLYGK	CG6438-PA	1a	gi|17136192	1	1
DPQQTTLCGVK	CG32702-PA	1a	gi|24640838	0	276
DPSILSVPGLADR	CG3132-PA	1a	gi|24646169	1	41
DPTATKPEDWDDR	CG9429-PA	1a	gi|24645441	1	15
DPVFEVLLR	CG17560-PA	1a	gi|24647494	0	24
DQAAAAAEEK	CG12818-PA	1a	gi|24645661	1	1
DQGLNVLFNNAGIAPK	CG10964-PA	1a	gi|24640547	1	1
DQPFASDDIR	CG1977-PA	1a	gi|17136504	1	127
DQTAEETAVLVQK	CG1982-PA	1a	gi|17137530	1	10
DQTFAEALSEPGLVFVAAK	CG1548-PA	1a	gi|21355083	1	32
DQVFEVLLNK	CG10097-PB	1a	gi|78706758	0	80
DQVHTQELTETR	CG10119-PA	1a	gi|24653664	1	59
DQVSNSAFVER	CG1242-PA	1a	gi|17647529	1	38
DRDELIEEFSK	CG17838-PC	1a	gi|161078446	1	3
DRESVQFQNLQK	CG33950-PF	1a	gi|78706474	1	871
DRTEVPSVGVAKPSEPELPK	CG9066-PA	1a	gi|18859969	1	38
DSAQDYLDIK	CG12840-PA	1a	gi|17737437	1	6
DSDLVVACAPR	CG9623-PB	1a	gi|24642641	0	16
DSLEGYVNETAK	CG8843-PA	1a	gi|19920648	0	1
DSVQIPIAVLK	CG7917-PA	1a	gi|17738283	1	19
DTALALGDFTR	CG6831-PA	1a	gi|21355751	1	106
DTDDDDEDDEDKPLVK	CG9432-PA	1a	gi|24586060	1	4
DTDTLESLSLR	CG10849-PA	1a	gi|24657023	1	63
DTFQDFAQSPAIAGGAESSPPK	CG7603-PA	1a	gi|21355241	1	11
DTFSFLTGSGR	CG12140-PA	1a	gi|24652256	1	51
DTPEDNPNIPFEFTAENK	CG5703-PA	1a	gi|18859877	1	37
DTPGAVVGEITFQPK	CG8849-PA	1a	gi|17647677	1	2
DTSFEQLVLR	CG3523-PA	1a	gi|19920632	1	105
DTVDPSACNTNPSIYEQYSR	CG30359-PA	1a	gi|24586593	1	2
DTYSLPDSR	CG3322-PA	1a	gi|17737557	0	130
DVAGAEALLER	CG1977-PA	1a	gi|17136504	1	127
DVAQQSFDQIK	CG17374-PA	1a	gi|62862516	1	17
DVATFLK	CG4769-PA	1a	gi|24658292	0	37
DVAWAPSIGLPR	CG6773-PA	1a	gi|21356113	1	1
DVEGISDENALK	CG12505-PA	1a	gi|24653618	1	7
DVEGQNLGR	CG32092-PB	1a	gi|24662922	0	88
DVEINDLNAQVNDLR	CG7178-PA	1a	gi|24642961	1	39
DVEMRPDEQIISR	CG6917-PA	1a	gi|28574499	1	29
DVESNLGLLER	CG30000-PA	1a	gi|21686985	1	12
DVIFSFPVEIK	CG5362-PA	1a	gi|24583394	1	4
DVNYGWLLR	CG34090-PA	1a	gi|5835245	0	1
DVPVAVAPVAPVLAK	CG1259-PB	1a	gi|21355869	1	19
DVSAALQTAK	CG7113-PA	1a	gi|17737361	1	94
DVVLSSDDYGR	CG1977-PA	1a	gi|17136504	1	127
DWETFVR	CG6821-PA	1a	gi|17647601	1	120
DYDALDIANK	CG7977-PA	1a	gi|24655502	1	44
DYEINDLNAQVNDLR	CG7178-PB	1a	gi|24642959	1	54
DYHLEAAISK	CG7461-PA	1a	gi|24655582	1	96
DYLAQEFNALK	CG2918-PA	1a	gi|20128923	1	26
DYLLVQQR	CG32702-PA	1a	gi|24640838	0	276
EAAAAEEPQPSDEGDVVAK	CG7752-PA	1a	gi|24667974	1	2
EAADELEALR	CG9762-PA	1a	gi|21356475	0	39
EAADELEALRGD	CG9762-PA	1a	gi|21356475	1	39
EAAFSLAEAK	CG8186-PA	1a	gi|21355551	1	10
EAALAAGFSNK	CG4581-PA	1a	gi|17137578	1	55
EAASVPLGVLTSGQR	CG2107-PA	1a	gi|24656312	1	11
EAFLNADDDANAGGNVEALIK	CG1977-PA	1a	gi|17136504	1	127
EAFQLMDADK	CG2184-PA	1a	gi|17933672	1	196
EAFQLMDADKDGIIGK	CG2184-PA	1a	gi|17933672	1	196
EAGFPEGVVNVVPGFGTAGAALANHCDVDK	CG3752-PA	1a	gi|20129399	1	178
EAGVETGDEEDLSTPNEK	CG3821-PA	1a	gi|17136276	1	2
EAIALLEPMVK	CG11888-PA	1a	gi|24650984	1	11
EAIASVEALSK	CG10236-PA	1a	gi|17136292	0	274
EALAFAILEQALGAK	CG4169-PA	1a	gi|24665395	1	151
EALATVGAEHAVSLVSTR	CG7470-PA	1a	gi|21357643	1	101
EALLSAAQLANLK	CG2918-PA	1a	gi|20128923	1	26
EANFFESTSSTK	CG14207-PB	1a	gi|24643312	1	22
EANFFESTSSTTNSALPSR	CG14207-PA	1a	gi|19920346	1	9
EANVAAAFGKPINF	CG7430-PA	1a	gi|21358499	1	34
EAQDEVQR	CG9429-PA	1a	gi|24645441	1	15
EAQIYSLPLSK	CG9092-PA	1a	gi|24582088	0	20
EAQSNVATSNEVQAAEVVK	CG8443-PA	1a	gi|20130037	1	6
EASDVISASPSALQLR	CG7635-PA	1a	gi|18860517	1	4
EASLILGVSPSASK	CG7394-PA	1a	gi|24662741	1	3
EASLVPLIPSVLVK	CG4882-PA	1a	gi|17137576	1	2
EATLGGTCLNVGCIPSK	CG7430-PA	1a	gi|21358499	1	34
EATVAENNAR	CG10119-PA	1a	gi|24653664	0	59
EAVLFLR	CG5214-PA	1a	gi|24645909	0	48
EAYPGDVFYLHSR	CG3612-PA	1a	gi|24658560	1	476
EAYYWLSQNTADDAR	CG7748-PA	1a	gi|17738187	1	1
ECADLWPR	CG3661-PA	1a	gi|17647883	1	10
ECFDGLATNPDCR	CG9577-PA	1a	gi|19920382	1	15
ECGPMVLDALIK	CG3283-PA	1a	gi|17137106	1	39
ECVVALYDYTEK	CG1977-PA	1a	gi|17136504	1	127
EDANQQYPTEGDCLNVGVK	CG32702-PA	1a	gi|24640838	0	276
EDGAVLESGGDLK	CG14977-PA	1a	gi|28574298	1	4
EDIPKEEAEK	CG5012-PA	1a	gi|17864338	0	5
EDLQPVIISADIEDGSR	CG10236-PA	1a	gi|17136292	1	274
EDQLLIVSK	CG16935-PA	1a	gi|45550423	0	24
EDQTDYLEESK	CG1242-PA	1a	gi|17647529	1	38
EDVDPAAEFLAR	CG6948-PA	1a	gi|24667294	1	7
EDVGVTTITHQR	CG7923-PA	1a	gi|24662393	0	4
EDVLKDLPPK	CG4261-PA	1a	gi|24647318	0	2
EEAQDFLEEDTVR	CG5520-PA	1a	gi|21357739	1	116
EEEAIQLDGLNVAQLK	CG5520-PA	1a	gi|21357739	1	116
EEELLLQDFSR	CG5885-PA	1a	gi|19921016	1	5
EEGLTALWR	CG1907-PA	1a	gi|21358457	1	11
EEIDNYTEDYK	CG5870-PA	1a	gi|17647191	1	77
EEIFGPVQQLIR	CG3752-PA	1a	gi|20129399	1	178
EEIIPVAAQYDK	CG12262-PA	1a	gi|24660351	1	112
EENPDQECSLPQK	CG8194-PA	1a	gi|24660529	1	6
EESESGQLIGVYCGNEVPGVIHSR	CG32702-PA	1a	gi|24640838	0	276
EESNPAQEFLTK	CG11051-PA	1a	gi|21358539	1	7
EETVQDPQR	CG5499-PA	1a	gi|17738227	0	36
EEVQSGYK	CG5903-PA	1a	gi|21357927	0	16
EEVVEECGYDVPVER	CG31063-PA	1a	gi|24650557	1	1
EEYDESGPGIVHR	CG10067-PA	1a	gi|17647135	1	54
EFDGATLEPR	CG7470-PA	1a	gi|21357643	0	101
EFLQHIK	CG3612-PA	1a	gi|24658560	1	476
EFSWTAEDR	CG6821-PA	1a	gi|17647601	1	120
EFYDFIPLLTTPSDK	CG15102-PA	1a	gi|24655327	1	8
EGAFNAEITPIK	CG4600-PA	1a	gi|17648125	1	82
EGATLALVGR	CG3699-PA	1a	gi|23397609	0	23
EGFLELR	CG6008-PA	1a	gi|21356773	1	7
EGIVTSSDASEKEEIAK	CG3152-PA	1a	gi|24586016	1	10
EGLRDDLDDIDENDVGAK	CG3972-PA	1a	gi|17933498	1	601
EGNDLYNEMIEGGVISLK	CG11154-PA	1a	gi|24638766	1	585
EGNGYITTSTLK	CG6514-PA	1a	gi|24581885	1	16
EGPYGPAPSHQHYSAGPAGHGGYAAPAY	CG11213-PA	1a	gi|17530859	1	20
EGRPTAEQQTLIELEDQAR	CG7008-PA	1a	gi|20130403	1	7
EHGAPVDENR	CG11793-PA	1a	gi|17136496	1	16
EHGILIQSVQPGFVATNMSK	CG1444-PA	1a	gi|24640442	1	33
EICLLPVATGR	CG33103-PA	1a	gi|28572036	0	438
EICTLGFDLWQVK	CG9429-PA	1a	gi|24645441	1	15
EICTQGDNQLTEETGK	CG10576-PA	1a	gi|24658585	1	6
EIEEAIGTTTSK	CG3036-PA	1a	gi|20129235	1	1
EIEQMADQINAIK	CG1371-PA	1a	gi|20129847	1	13
EIESVTAADIQR	CG8728-PA	1a	gi|19921772	1	4
EIFELMEQGK	CG16935-PA	1a	gi|45550423	1	24
EILAALDDK	CG6514-PA	1a	gi|24581885	0	16
EINPVVQVLGVGYDR	CG2918-PA	1a	gi|20128923	1	26
EIQNAESLISQAEEALDGANK	CG3322-PA	1a	gi|17737557	1	130
EIQQEVNEIDDQNNK	CG6453-PA	1a	gi|19921464	1	9
EITSLAPSTIK	CG10067-PA	1a	gi|17647135	1	54
EIVHIQAGQCGNQIGAK	CG9277-PB	1a	gi|24655737	1	50
EIVHLQAGQCGNQIGSK	CG4869-PA	1a	gi|24650776	1	8
EKMRGNSALAKILR	CG5931-PA	1a	gi|28574898	0	5
ELAEDGYSGVEVR	CG6779-PA	1a	gi|17136324	1	63
ELALENER	CG10119-PA	1a	gi|24653664	0	59
ELDSCALAVNAQGLSQR	CG6831-PA	1a	gi|21355751	1	106
ELEALMTEDQYK	CG7758-PA	1a	gi|17865652	1	15
ELENLLDTER	CG10119-PA	1a	gi|24653664	1	59
ELETNPELHIR	CG5520-PA	1a	gi|21357739	1	116
ELFNTISQFGNNANAVTDR	CG5700-PB	1a	gi|24663043	0	215
ELIIGDR	CG3612-PA	1a	gi|24658560	0	476
ELISNASDAIDK	CG5520-PA	1a	gi|21357739	1	116
ELISNASDALDK	CG1242-PA	1a	gi|17647529	0	38
ELISNASDALEK	CG3152-PA	1a	gi|24586016	1	10
ELISSGQLGQVK	CG3609-PA	1a	gi|24581117	1	1
ELKDEVQNIGLISK	CG3322-PA	1a	gi|17737557	1	130
ELPYYEEANGSR	CG17524-PA	1a	gi|24654975	0	4
ELQDEIQEAR	CG33977-PA	1a	gi|85725222	0	11
ELQEEKDEALSVLDSNVSNL	CG5362-PA	1a	gi|24583394	1	4
ELQQALDLLNDEGAQALAR	CG3322-PA	1a	gi|17737557	1	130
ELSMEFADITDR	CG3944-PA	1a	gi|17864306	1	8
ELTAMVQK	CG6779-PA	1a	gi|17136324	1	63
ELTEQELEEALEK	CG32355-PA	1a	gi|45550575	0	2
ELTNSLIDPFER	CG7461-PA	1a	gi|24655582	1	96
ELTTPQASTEYVINR	CG12373-PA	1a	gi|20129927	0	6
ELVAQISNLISQESLK	CG11592-PA	1a	gi|19920458	0	27
ELVASQAFGSR	CG3156-PA	1a	gi|23397593	0	1
ELVEEVIEEEVK	CG1915-PC	1a	gi|161080703	0	363
ELVGYTVTTTADNAETGLR	CG4169-PA	1a	gi|24665395	1	151
ELVSEETGNPNPQMK	CG13037-PA	1a	gi|24665233	1	12
ELVTWTPAAK	CG2210-PA	1a	gi|45549037	1	30
ENANGTNVYVGIHPSK	CG6846-PA	1a	gi|21357853	1	18
ENCVDNPSYIEIR	CG4457-PA	1a	gi|24659997	1	1
ENEFNVVEVNTPK	CG7917-PA	1a	gi|17738283	1	19
ENGEYALSNYTEVK	CG3752-PA	1a	gi|20129399	1	178
ENIYEFNQETK	CG4178-PA	1a	gi|17136306	1	13
ENLIVPINVGENAAPGESEA	CG3403-PA	1a	gi|19921700	0	1
ENLSQFVNDPK	CG6821-PA	1a	gi|17647601	1	120
ENPLSNDQISQLK	CG7584-PA	1a	gi|24651098	1	6
ENPNLIPSAFDAR	CG11015-PA	1a	gi|20129279	1	18
ENTGGGEGIEVLK	CG5269-PA	1a	gi|17738047	1	3
ENVLIGEGAGFK	CG12262-PA	1a	gi|24660351	1	112
EPATINYPFEK	CG3944-PA	1a	gi|17864306	0	8
EPEPEDIVDAAIVK	CG1915-PC	1a	gi|161080703	0	363
EPIPVSQLVQR	CG5266-PA	1a	gi|17737927	1	3
EPLAAVVAAEPLLK	CG1330-PA	1a	gi|21358141	0	13
EPMQTGIK	CG3612-PA	1a	gi|24658560	1	476
EPSVNEQLTPEEALQR	CG12954-PA	1a	gi|21687222	0	5
EPVQAVQVFGR	CG4046-PA	1a	gi|19922746	1	48
EPVTVATGPLIFK	CG16935-PA	1a	gi|45550423	1	24
EQAAQLYSAGEAK	CG9579-PA	1a	gi|17136288	1	21
EQFGLVNTR	CG1751-PA	1a	gi|24641313	0	8
EQGIDEAETVLLR	CG6831-PA	1a	gi|21355751	1	106
EQKEWYDQGIDELQK	CG16771-PA	1a	gi|24585213	0	1
EQQIVIQSSGGLSK	CG8542-PA	1a	gi|24653595	1	38
EQVDSQAFADVANR	CG4686-PA	1a	gi|24648277	0	2
EQVENLNIGK	CG1837-PA	1a	gi|18859803	1	16
ERVDEFSLLSQK	CG4600-PA	1a	gi|17648125	1	82
ESENLSNDQEIDFLK	CG30021-PA	1a	gi|24652624	1	1
ESETTSEQLDLLEK	CG9342-PA	1a	gi|24585552	1	5
ESHILQSNVTNK	CG9066-PA	1a	gi|18859969	1	38
ESLLTESVLEDIK	CG12235-PA	1a	gi|19920358	1	2
ESNAGAGSSDSSSSSDTSGEAK	CG8542-PA	1a	gi|24653595	1	38
ESQDPKPTDFLSK	CG7712-PA	1a	gi|19922002	1	11
ESQEQDEILSVPK	CG11592-PA	1a	gi|19920458	0	27
ESTGTGPTMFNENETIAK	CG14804-PA	1a	gi|24639192	1	2
ESVIQTVATLTR	CG9342-PA	1a	gi|24585552	0	5
ESVQFQNLQK	CG33950-PF	1a	gi|78706474	0	871
ESVVVSNEQQVAK	CG10540-PA	1a	gi|19922662	1	3
ESWDTLEQAK	CG13091-PA	1a	gi|19920962	0	37
ETENVQSYEEIENAFR	CG1977-PA	1a	gi|17136504	1	127
ETFAPIVYILK	CG9629-PA	1a	gi|24666674	1	21
ETIINYEDEGGGER	CG3722-PA	1a	gi|17136470	0	1
ETPGLIVNKPEDK	CG3902-PA	1a	gi|24666513	1	54
ETPVFELPLSASAGR	CG3132-PA	1a	gi|24646169	1	41
ETSSGETIVEVDLSK	CG3523-PA	1a	gi|19920632	1	105
ETSTEETTTAQK	CG5131-PA	1a	gi|24584843	0	1
ETTATTDFGEGSLLR	CG3152-PA	1a	gi|24586016	1	10
EVADAEIAAFPR	CG32531-PA	1a	gi|24643241	1	4
EVAPTTGEAIQK	CG8055-PA	1a	gi|28573949	1	3
EVDDLEQWITDR	CG5870-PA	1a	gi|17647191	1	77
EVDFVVDEHPRPK	CG4600-PA	1a	gi|17648125	1	82
EVDIGMAADVGTLQR	CG9577-PA	1a	gi|19920382	1	15
EVEGLSALEEK	CG9456-PA	1a	gi|24586111	0	1
EVLPPIDLVEQQK	CG3621-PA	1a	gi|24639292	1	11
EVQPPTIEVIDLDTPK	CG6667-PC	1a	gi|24584826	0	2
EVSDGLVILR	CG16965-PA	1a	gi|24583760	0	21
EVTGALSATVDCIPGQR	CG6831-PA	1a	gi|21355751	0	106
EVTINSPAR	CG32702-PA	1a	gi|24640838	0	276
EYALLFAER	CG3415-PA	1a	gi|18859837	1	76
EYCLLSNNIYDYR	CG17927-PJ	1a	gi|24584698	0	3
EYNLKPLAR	CG4600-PA	1a	gi|17648125	1	82
EYVTSPIINK	CG4307-PA	1a	gi|24647054	1	64
EYVYTLCPFDR	CG6453-PA	1a	gi|19921464	1	9
FAAAASASAAPAAGGATEK	CG7490-PA	1a	gi|17737731	1	43
FADSLDDSTK	CG7013-PA	1a	gi|17137698	1	6
FAEEVITAEPAQR	CG3523-PA	1a	gi|19920632	1	105
FAELMSNEITQPVETIK	CG3523-PA	1a	gi|19920632	1	105
FAGCGSVPVGELCK	CG10236-PA	1a	gi|17136292	1	274
FAGSLLK	CG7998-PA	1a	gi|24647881	0	156
FAGVDIR	CG4046-PA	1a	gi|19922746	0	48
FAGVYSDHQIPR	CG32702-PA	1a	gi|24640838	0	276
FALLQPELEINPK	CG3152-PA	1a	gi|24586016	1	10
FALLVNLGKK	CG5931-PA	1a	gi|28574898	0	5
FAQVQSLPLIVDFNHESASK	CG6988-PA	1a	gi|17647799	1	73
FATDDSYLDPTNLNGK	CG1977-PA	1a	gi|17136504	1	127
FAYDVQDTLTGDSK	CG1259-PB	1a	gi|21355869	1	19
FCPAGVYEYVPNEEGGNMK	CG12140-PA	1a	gi|24652256	1	51
FDAPINDIEK	CG12324-PA	1a	gi|24652557	1	19
FDGILGLGYNSISVDK	CG1548-PA	1a	gi|21355083	1	32
FDMVVPILEK	CG10504-PA	1a	gi|24667933	1	3
FDSDVYLPYEK	CG9244-PB	1a	gi|17864292	1	473
FDSSSPLPGNLGVALYK	CG1371-PA	1a	gi|20129847	1	13
FDTVSEQK	CG10236-PA	1a	gi|17136292	0	274
FDWLQINDGR	CG32702-PA	1a	gi|24640838	0	276
FDYEVFSK	CG6821-PA	1a	gi|17647601	1	120
FEADYDYITNEGSK	CG5355-PA	1a	gi|24583414	1	4
FEDEDSGLGVR	CG15096-PB	1a	gi|24655271	0	11
FEDESLPNLPANVK	CG4302-PA	1a	gi|19922680	1	16
FEDGLADR	CG3621-PA	1a	gi|24639292	1	11
FEDNESTSYALR	CG6904-PA	1a	gi|45551893	1	27
FFFSDQNIDSR	CG6831-PA	1a	gi|21355751	1	106
FFSDVNDAAR	CG7461-PA	1a	gi|24655582	1	96
FGAMLDQLTDR	CG9245-PA	1a	gi|24642243	1	1
FGGPLNNAIYQQGCVDK	CG6120-PA	1a	gi|17738195	0	11
FGIQAQTISTDFK	CG11981-PA	1a	gi|21355629	1	1
FGLIYR	CG5889-PA	1a	gi|21356279	0	9
FGLNEGSEPQAYGIGLK	CG12140-PA	1a	gi|24652256	1	51
FGLYEVFK	CG9090-PA	1a	gi|24656137	1	119
FGNCLQAVVTDR	CG11592-PA	1a	gi|19920458	0	27
FGPLADEDR	CG9140-PA	1a	gi|19920794	1	22
FHVVAPGEAATQFLR	CG1787-PA	1a	gi|17933586	1	29
FIDLTDQDVTK	CG5009-PA	1a	gi|24654595	1	7
FIESGHFDADNIR	CG1977-PA	1a	gi|17136504	1	127
FILQAWK	CG32092-PB	1a	gi|24662922	0	88
FINLTDTDLSGLQDR	CG9707-PA	1a	gi|17647123	1	1
FISSEDLASDFKEEPR	CG33113-PF	1a	gi|28574660	1	56
FITEQVYPAVK	CG9796-PA	1a	gi|28573018	1	7
FIVEEDAEAMQK	CG7930-PA	1a	gi|24665772	1	40
FIVEEDDEAMQK	CG9073-PA	1a	gi|17136890	1	33
FLDDFEEPK	CG7319-PC	1a	gi|45553069	0	4
FLDGIPAENQGFR	CG32702-PA	1a	gi|24640838	0	276
FLDNNSIDNPK	CG9006-PA	1a	gi|24652780	1	3
FLDPSVLPANYK	CG5958-PA	1a	gi|24582499	1	8
FLDSSKDEIIR	CG4904-PA	1a	gi|17737405	1	12
FLGEANTEWSEEK	CG1105-PA	1a	gi|24644712	0	3
FLGINR	CG3214-PA	1a	gi|24581165	0	13
FLPNGPVALLPLTDR	CG7277-PA	1a	gi|19920760	0	3
FLPVDEDTVDR	CG11967-PA	1a	gi|24645213	0	4
FLSDDPESYKPCDPEIIVSR	CG5870-PA	1a	gi|17647191	1	77
FLYTLVVQDK	CG18001-PA	1a	gi|116007488	1	7
FNEAQDESK	CG3612-PA	1a	gi|24658560	1	476
FNEAQDESKK	CG3612-PA	1a	gi|24658560	1	476
FNFETGR	CG6779-PA	1a	gi|17136324	1	63
FNNVDR	CG6120-PA	1a	gi|17738195	0	11
FPADYATSSI	CG5677-PA	1a	gi|21355207	0	5
FPEVAAAYSEDK	CG11858-PA	1a	gi|21356303	1	2
FPFLANSR	CG7430-PA	1a	gi|21358499	1	34
FPNWELPAGVTPK	CG15293-PA	1a	gi|19921326	1	2
FPWGEGQK	CG17280-PA	1a	gi|20130301	1	2
FPYTAPTR	CG6253-PA	1a	gi|17647881	0	31
FPYYNIVGDPER	CG2918-PA	1a	gi|20128923	1	26
FQADANGEIDR	CG3322-PA	1a	gi|17737557	1	130
FQATSASPDVAVK	CG2736-PA	1a	gi|19922958	0	4
FQDLGAAYEVLSNPDK	CG4164-PA	1a	gi|19920464	1	1
FQDPVPYSWR	CG32702-PA	1a	gi|24640838	0	276
FQQAPTIVVNSAGITR	CG3603-PA	1a	gi|24639444	1	23
FQSEGLLK	CG11527-PA	1a	gi|17136984	0	36
FRPEINLDK	CG15442-PA	1a	gi|17136880	1	7
FSDDLQTEYK	CG1444-PA	1a	gi|24640442	1	33
FSFLQFDPAPR	CG7109-PA	1a	gi|17136620	1	1
FSPNHSNPIIVSCGWDR	CG7111-PA	1a	gi|17137396	1	29
FSSCNGMLSAQSGR	CG32702-PA	1a	gi|24640838	0	276
FSTVGGESGSADTAR	CG6871-PA	1a	gi|17981717	1	74
FTDVFYTFK	CG6821-PA	1a	gi|17647601	1	120
FTFQTEVNR	CG5520-PA	1a	gi|21357739	1	116
FTSGDINQVVLQNVTK	CG8186-PA	1a	gi|21355551	1	10
FTTANWAPIR	CG4104-PA	1a	gi|19920676	1	24
FVALINEK	CG4398-PA	1a	gi|24654162	0	2
FVAVQNVNNYR	CG32092-PB	1a	gi|24662922	0	88
FVAYIDEEQK	CG11967-PA	1a	gi|24645213	0	4
FVDGLMIHSGDPCNDYVETATR	CG6779-PA	1a	gi|17136324	1	63
FVDTKPFGYPFDR	CG6821-PA	1a	gi|17647601	1	120
FVELMTTGSDNAK	CG10106-PA	1a	gi|17648067	1	17
FVNLATTAPK	CG4104-PA	1a	gi|19920676	1	24
FVQTGR	CG6253-PA	1a	gi|17647881	0	31
FVSDGIFK	CG6779-PA	1a	gi|17136324	1	63
FVVYVEK	CG6846-PA	1a	gi|21357853	1	18
FYDSVVDDQR	CG32092-PB	1a	gi|24662922	0	88
FYGPGGPYATFAGR	CG9066-PA	1a	gi|18859969	1	38
FYIEDSPGCTK	CG32702-PA	1a	gi|24640838	0	276
FYNDYVQNTPK	CG13393-PA	1a	gi|20129377	1	13
FYPEHLTCPAAK	CG13091-PA	1a	gi|19920962	1	37
FYTDDSPGIK	CG10130-PA	1a	gi|21356199	1	6
GAAEGLDGLGVPIIAMPSTTNK	CG7920-PA	1a	gi|21358615	1	100
GACSLGSTQPDSQVMVINAVK	CG6831-PA	1a	gi|21355751	1	106
GADCCVLVYDVTAPNSFK	CG5915-PA	1a	gi|17865835	1	9
GADMIKEEYLGGK	CG9512-PA	1a	gi|18859993	1	12
GADWIVNEIK	CG9140-PA	1a	gi|19920794	1	22
GAIFVQECIPER	CG9914-PA	1a	gi|45549573	1	3
GAIGLTGPR	CG16858-PA	1a	gi|17137252	0	190
GALESNFHLEGAER	CG3373-PA	1a	gi|17137194	1	26
GALQDGTEFDSSYSR	CG14715-PA	1a	gi|21356629	1	3
GAMAVIDGNVLAINPGEDTK	CG8443-PA	1a	gi|20130037	1	6
GAMIPLLDLAQR	CG5703-PA	1a	gi|18859877	1	37
GAPGAAAAAAAGAAGAAAAAAKPKK	CG11949-PA	1a	gi|24655527	0	43
GAPSTPLVSVATTK	CG9629-PA	1a	gi|24666674	1	21
GAPVENEAAAEDAAAPASGGDVK	CG5590-PA	1a	gi|21357673	1	55
GASALDVAK	CG9090-PA	1a	gi|24656137	0	119
GAVLRPSLDDPVTIEYVK	CG3415-PA	1a	gi|18859837	1	76
GAWEHPEIANPEYVPDDK	CG9429-PA	1a	gi|24645441	1	15
GCEVVVSGK	CG6779-PA	1a	gi|17136324	1	63
GDAQPAEIDMLWEISK	CG9140-PA	1a	gi|19920794	1	22
GDDCPVCNAGPR	CG16858-PA	1a	gi|17137252	1	190
GDEELDSLIK	CG5499-PA	1a	gi|17738227	1	36
GDFCIQVGR	CG2210-PA	1a	gi|45549037	1	30
GDFDENLTYPEQK	CG4764-PA	1a	gi|19920498	1	18
GDGGSPLVCPIAGQK	CG5390-PA	1a	gi|20129425	1	1
GDLIAYLK	CG17903-PA	1a	gi|17137228	1	23
GDNAVLDFK	CG5677-PA	1a	gi|21355207	1	5
GDNDPIDVIEIGYR	CG4634-PA	1a	gi|45549187	1	4
GDNDSEALR	CG6455-PA	1a	gi|45549224	0	49
GDNITLIQNVSPTKD	CG18591-PA	1a	gi|24582631	1	2
GDPEALALIQR	CG4764-PA	1a	gi|19920498	1	18
GDQGEVGYTGADGPQGQR	CG16858-PA	1a	gi|17137252	1	190
GDVLTLLNSNNK	CG1977-PA	1a	gi|17136504	0	127
GDWLEQAGGFK	CG9512-PA	1a	gi|18859993	1	12
GDYGDAGYQGR	CG16858-PA	1a	gi|17137252	0	190
GEDLATAILK	CG2331-PA	1a	gi|17137560	1	19
GEEPTNYDDDEDEENVNNDEQER	CG9066-PA	1a	gi|18859969	1	38
GEFEFPQPAK	CG9258-PA	1a	gi|17137210	1	7
GEHISDENSSESGAR	CG15012-PB	1a	gi|24657484	0	2
GEIAGPPDTPYEGGK	CG8284-PA	1a	gi|24661830	1	3
GELVTVNFTGK	CG5482-PA	1a	gi|19922556	1	13
GEPSYDLQNAAIEIASDYTK	CG5870-PA	1a	gi|17647191	1	77
GEPTSLSEEPK	CG5703-PA	1a	gi|18859877	1	37
GESGYAIVGR	CG16858-PA	1a	gi|17137252	1	190
GEYTHSTLQDYPSISQINQK	CG1560-PA	1a	gi|24640486	1	17
GFDTSTPVSQFIPIEK	CG5793-PA	1a	gi|28571789	1	14
GFIFAR	CG16858-PA	1a	gi|17137252	0	190
GFNESPLKA	CG13240-PA	1a	gi|19921400	1	25
GFTGDQGLQGER	CG16858-PA	1a	gi|17137252	1	190
GFYGNALGGTPNDCK	CG3322-PA	1a	gi|17737557	1	130
GGAEQFLEETER	CG8351-PA	1a	gi|24645179	1	4
GGAVQGASSVR	CG4666-PA	1a	gi|18858163	0	11
GGCQVIADTGTSLIAAPLEEATSINQK	CG1548-PA	1a	gi|21355083	1	32
GGGGGGSGGGGGGSGGGGSR	CG6987-PA	1a	gi|21358097	1	2
GGGGGGSGGGGGGSGGGGSRDYRDR	CG6987-PA	1a	gi|21358097	0	2
GGIIDEQAVLDGLESGK	CG6287-PA	1a	gi|19921140	1	4
GGTLPTGSVFPTSQQR	CG32638-PA	1a	gi|24641679	1	15
GGTQHLGLPVFASVAEAK	CG1065-PA	1a	gi|28574296	1	99
GGVFDTIQK	CG10106-PA	1a	gi|17648067	1	17
GGVIFVDEIPKNPSGK	CG6178-PA	1a	gi|21355181	1	15
GGVWFASFGR	CG9140-PA	1a	gi|19920794	1	22
GGYGGGYGGGYGPVQR	CG6519-PA	1a	gi|17647277	1	2
GHLENNPQLEK	CG7490-PA	1a	gi|17737731	1	43
GIATNDVGIAK	CG12140-PA	1a	gi|24652256	1	51
GIILIGEIGGVAEEK	CG1065-PA	1a	gi|28574296	1	99
GIIQQDGLGFSGLNK	CG5254-PA	1a	gi|24638958	1	13
GILLYGTPEQK	CG7461-PA	1a	gi|24655582	1	96
GIMPPILAETPK	CG5254-PA	1a	gi|24638958	1	13
GINQTQLQTTAAK	CG4600-PA	1a	gi|17648125	1	82
GISAFIVPK	CG4703-PA	1a	gi|21356377	1	12
GISQEFAEK	CG6459-PA	1a	gi|20130085	1	11
GITFEDVR	CG12262-PA	1a	gi|24660351	1	112
GITTFIVDR	CG3902-PA	1a	gi|24666513	1	54
GKVEKLEIELAR	CG7765-PA	1a	gi|17136240	1	4
GKYTEETAAQPMETA	CG6846-PA	1a	gi|21357853	1	18
GLANGLCISGSALGSIILPPLLR	CG11665-PA	1a	gi|24585866	0	2
GLAVVDNSFQEVK	CG5826-PA	1a	gi|17738015	1	23
GLCAIAQAESLR	CG6779-PA	1a	gi|17136324	1	63
GLDGGNSASLSTLQAAK	CG2668-PA	1a	gi|19922964	1	12
GLFDALDHQSVR	CG4769-PA	1a	gi|24658292	1	37
GLGGGDGSAEPGVHDQNPEGLQR	CG5654-PA	1a	gi|24663131	1	2
GLGISVEQR	CG16965-PA	1a	gi|24583760	0	21
GLGIYLEGLK	CG4598-PA	1a	gi|24583165	1	16
GLHNATIK	CG14028-PA	1a	gi|24581914	1	35
GLPGPQGEPAPAPPAPK	CG16858-PA	1a	gi|17137252	1	190
GLPSIVTQR	CG7910-PA	1a	gi|24644968	0	90
GLQLTQPNTNNFGR	CG3922-PB	1a	gi|17647889	1	11
GLVVPVIR	CG5214-PA	1a	gi|24645909	1	48
GMALNLEPDNVGVVVFGNDK	CG3612-PA	1a	gi|24658560	1	476
GMFNPEDLVR	CG8210-PA	1a	gi|17136892	1	3
GMPIGLQVVAAQYQDK	CG7910-PA	1a	gi|24644968	0	90
GMVADPEECDMEELLQLK	CG11567-PA	1a	gi|17137192	1	177
GNENNFGLLSFQSR	CG8470-PA	1a	gi|17530957	1	1
GNFFIGLNNLNK	CG5550-PA	1a	gi|24654259	0	9
GNIGQTNYGLANSAMER	CG3523-PA	1a	gi|19920632	1	105
GNLNMTPQQR	CG8602-PA	1a	gi|21356765	0	6
GNMGQTNYGLANSTMER	CG3524-PA	1a	gi|24581345	0	30
GNSFVAR	CG16858-PA	1a	gi|17137252	0	190
GNTLTSSITYPQNK	CG11213-PA	1a	gi|17530859	0	20
GNVETFVAK	CG8282-PA	1a	gi|19920922	0	3
GNVGFVFTK	CG7490-PA	1a	gi|17737731	1	43
GPAVLSNLGR	CG3560-PA	1a	gi|24642430	1	35
GPEETLR	CG3989-PA	1a	gi|18860083	0	29
GPGAGGSNVHELDPNTNVNSQPSDTK	CG10497-PA	1a	gi|17136884	1	12
GPGFGLQAGL	CG5703-PA	1a	gi|18859877	0	37
GPIGLAGQSGDPGLNGSR	CG16858-PA	1a	gi|17137252	1	190
GPLVVYDKDEGLRK	CG5502-PA	1a	gi|24650747	1	19
GPQGESGVVGLDGR	CG16858-PA	1a	gi|17137252	1	190
GPQGESGVVGLDGRNGQIGDQGPR	CG16858-PA	1a	gi|17137252	1	190
GPSVTSYDPGTGQPIAK	CG9629-PA	1a	gi|24666674	1	21
GPVGDSQPALDGVAGR	CG16858-PA	1a	gi|17137252	1	190
GPVGVEGLLTTK	CG7470-PA	1a	gi|21357643	1	101
GQAVLFTNDGPSVLR	CG3132-PA	1a	gi|24646169	1	41
GQDHCGIESSISAGLPK	CG10992-PA	1a	gi|18921171	1	1
GQDNDDQSQEVEK	CG9432-PA	1a	gi|24586060	1	4
GQDTTDPIIQIGK	CG6251-PA	1a	gi|20130049	1	1
GQMQAAFEDAAFK	CG17051-PA	1a	gi|17647355	1	1
GQSPQAESLVR	CG3299-PA	1a	gi|17136646	1	99
GQTDDSGCAPIFR	CG30109-PA	1a	gi|24654512	0	1
GQTQSQYLNFGKPEEDGK	CG5700-PB	1a	gi|24663043	0	215
GSALCALEDK	CG6050-PA	1a	gi|17864358	1	5
GSDDILETCK	CG5703-PA	1a	gi|18859877	1	37
GSDDILETCKK	CG5703-PA	1a	gi|18859877	0	37
GSDLITIIK	CG2668-PA	1a	gi|19922964	0	12
GSDVVVIPAGVPR	CG7998-PA	1a	gi|24647881	1	156
GSGAVVVTNSESFDESGR	CG3415-PA	1a	gi|18859837	1	76
GSGISWQNIESQR	CG11527-PA	1a	gi|17136984	1	36
GSINVADLNSEK	CG2064-PA	1a	gi|22024069	1	1
GSLVSSQVFPYPDVLTAEQK	CG7461-PA	1a	gi|24655582	1	96
GSPQDYIVNER	CG12845-PA	1a	gi|22026781	0	13
GSQPAPILLVANK	CG3204-PA	1a	gi|17137620	0	2
GSSTCELVFQDLK	CG6638-PA	1a	gi|21355753	1	3
GSTIDLTSEYLQIPTLR	CG32702-PA	1a	gi|24640838	0	276
GSVVDNVLYR	CG9603-PA	1a	gi|24645039	1	11
GSYEFATIDQDKDHFGS	CG12703-PA	1a	gi|24643394	1	9
GSYSLIEPDGSR	CG1259-PB	1a	gi|21355869	1	19
GSYSVVDADGSLR	CG15007-PA	1a	gi|161081372	0	6
GTADVLLR	CG1907-PA	1a	gi|21358457	1	11
GTDITEAFEAHHLTTAPEK	CG13279-PA	1a	gi|17137186	1	9
GTFAVALQK	CG1751-PA	1a	gi|24641313	1	8
GTFGFFQSPNYPK	CG32702-PA	1a	gi|24640838	1	276
GTGIVSAPVPK	CG5920-PA	1a	gi|17136734	1	30
GTIEIINDVPILKPGDK	CG7490-PA	1a	gi|17737731	1	43
GTIVFDSDASNTFR	CG32702-PA	1a	gi|24640838	0	276
GTLSSMGIVYR	CG5254-PA	1a	gi|24638958	0	13
GTPLPETLEDGETFGR	CG8654-PA	1a	gi|19922616	1	1
GTQAEIVVADVTK	CG3699-PA	1a	gi|23397609	1	23
GTSAGLFGEAVNCAGGVGASVK	CG4169-PA	1a	gi|24665395	1	151
GTSLISELEK	CG5167-PA	1a	gi|24646278	1	6
GTVFFEQESSGTPVK	CG11793-PA	1a	gi|17136496	1	16
GTVQDGGMGVPGGR	CG2520-PA	1a	gi|24644772	1	11
GTYLSYGECQANEFR	CG33950-PG	1a	gi|161077537	0	4
GTYTVCFNNER	CG3564-PA	1a	gi|18921123	1	8
GVAYVNGFNLGR	CG9092-PA	1a	gi|24582088	1	20
GVDLVLNSLSEEK	CG3523-PA	1a	gi|19920632	1	105
GVDVCNEPVTTGPCTDWQTK	CG33103-PA	1a	gi|28572036	0	438
GVEEDWLTAR	CG4115-PA	1a	gi|24646246	1	5
GVEITPDTSDEGPVR	CG5700-PB	1a	gi|24663043	0	215
GVEQELIQWQQK	CG11527-PA	1a	gi|17136984	1	36
GVFSEQLYPK	CG30000-PA	1a	gi|21686985	0	12
GVGTEEMLISTAK	CG6831-PA	1a	gi|21355751	1	106
GVIQEVSLLTK	CG11785-PA	1a	gi|28571872	1	2
GVLATPDYSNVGDLQTLNMK	CG6439-PA	1a	gi|24648872	1	38
GVQVVPIAPGDGSTYPK	CG11001-PA	1a	gi|24655568	0	8
GVVDSDDLPLNVSR	CG5520-PA	1a	gi|21357739	1	116
GVVDSEDIPLNLSR	CG3152-PA	1a	gi|24586016	1	10
GVVDSEDLPLNISR	CG1242-PA	1a	gi|17647529	1	38
GVVSDTAPQCVSSAR	CG11208-PA	1a	gi|19922626	1	2
GYDLSEQSFLR	CG1787-PA	1a	gi|17933586	1	29
GYFEIR	CG9603-PA	1a	gi|24645039	0	11
GYFTDLVPFK	CG4581-PA	1a	gi|17137578	1	55
GYGCAGVSSVAYGLLTR	CG9547-PA	1a	gi|19920834	1	1
GYVAATGFNDR	CG9512-PA	1a	gi|18859993	1	12
HALDDAVK	CG1751-PA	1a	gi|24641313	1	8
HALIIYDDLSK	CG3612-PA	1a	gi|24658560	1	476
HALISQSK	CG1065-PA	1a	gi|28574296	1	99
HALLEADVMAHQDR	CG1977-PA	1a	gi|17136504	1	127
HAQKEDENDVLTK	CG7808-PC	1a	gi|24651181	1	38
HATGEGGTVFDAGLAR	CG12859-PA	1a	gi|20130001	1	4
HDFNRPAGIAAAPGAR	CG11661-PI	1a	gi|161084461	0	218
HEALQLR	CG16904-PA	1a	gi|24645538	0	3
HEQNIDCGGGYVK	CG9429-PA	1a	gi|24645441	1	15
HESYSSDALEK	CG2050-PA	1a	gi|24651794	1	11
HFELLSALTK	CG3523-PA	1a	gi|19920632	1	105
HGLEPLDPINQK	CG6155-PA	1a	gi|24653432	1	8
HGPLSVAIDASPK	CG8947-PA	1a	gi|20428641	1	83
HGPQDHESLKPASSCPPIVYPKPDGK	CG12140-PA	1a	gi|24652256	1	51
HISNPCELGNMELCR	CG10236-PA	1a	gi|17136292	1	274
HLGDLGNIEATGDCPTK	CG11793-PA	1a	gi|17136496	1	16
HLISETNK	CG32702-PA	1a	gi|24640838	0	276
HLMGVEDLLQK	CG5870-PA	1a	gi|17647191	1	77
HNNEFTYEGIK	CG10242-PA	1a	gi|24653737	1	2
HPARPLTPEEEDLF	CG6803-PB	1a	gi|21357797	1	71
HQAFEAEIAANK	CG5870-PA	1a	gi|17647191	1	77
HQLVEADIVAHEDR	CG1977-PA	1a	gi|17136504	1	127
HQQQVSLEEAQNTSR	CG1167-PA	1a	gi|24657269	1	2
HSFQNLQANANK	CG8604-PA	1a	gi|17647155	0	3
HSLAGQGLAK	CG2520-PA	1a	gi|24644772	1	11
HSNVVINLVGR	CG6020-PA	1a	gi|24667554	1	2
HTNIDTVIIR	CG6439-PA	1a	gi|24648872	1	38
HVADILGFEGNEK	CG9946-PA	1a	gi|18860087	1	2
HVDSLPFGYPFDR	CG2559-PA	1a	gi|24641542	1	5
HVGLNCGVPIEKPALGINR	CG4600-PA	1a	gi|17648125	1	82
HYDGLQGR	CG32702-PA	1a	gi|24640838	0	276
IAAEEALLAEAAAQK	CG6544-PA	1a	gi|45550732	0	44
IADMSLAMESAR	CG4703-PA	1a	gi|21356377	1	12
IADVVYNASNNELVR	CG7808-PC	1a	gi|24651181	1	38
IAEASEDVTR	CG3299-PA	1a	gi|17136646	1	99
IAEVVVVSAAR	CG10932-PA	1a	gi|24640423	1	18
IAGDEELAFK	CG10119-PA	1a	gi|24653664	1	59
IAGNIMLTQK	CG11151-PA	1a	gi|18859687	1	20
IAGYVTHLMGR	CG3922-PB	1a	gi|17647889	1	11
IALTGGVENMSQSPFIAR	CG4600-PA	1a	gi|17648125	1	82
IAMQTLDAGR	CG4703-PA	1a	gi|21356377	1	12
IANADQLLTTDIDK	CG12703-PA	1a	gi|24643394	0	9
IAQTYYLTYK	CG5266-PA	1a	gi|17737927	1	3
IAQVLVTKPDFYNEETR	CG7470-PA	1a	gi|21357643	1	101
IASDAVQIFGGNGFNSEYPVEK	CG12262-PA	1a	gi|24660351	1	112
IASDYLK	CG2168-PA	1a	gi|17864162	1	33
IASGEGGDEELTTNGDAKPATPAAQPAK	CG4008-PA	1a	gi|17137568	1	7
IASVEEIFCK	CG33113-PF	1a	gi|28574660	1	56
IATNKPPYASLDER	CG10236-PA	1a	gi|17136292	1	274
ICEEVAIIPTKPLR	CG3922-PB	1a	gi|17647889	1	11
IDAQINSELEK	CG8031-PA	1a	gi|21357419	1	1
IDEGLLSK	CG6370-PA	1a	gi|19922486	1	19
IDEIFGTVR	CG4038-PA	1a	gi|17137002	1	1
IDEPLMFEEWIK	CG6821-PA	1a	gi|17647601	1	120
IDFTNVLASGTQDIR	CG1635-PA	1a	gi|28571955	0	4
IDGCMEELR	CG32702-PA	1a	gi|24640838	0	276
IDQFIDQCYGNTDDLGR	CG8199-PA	1a	gi|21355903	1	1
IDQGRPVENTK	CG3320-PA	1a	gi|24648682	1	16
IDTFLDFAK	CG6206-PA	1a	gi|19921088	1	68
IDVLVNNAGILGK	CG3699-PA	1a	gi|23397609	1	23
IDVTTSPSLSGR	CG5554-PA	1a	gi|20130317	1	7
IDVYYNEASSGK	CG4869-PA	1a	gi|24650776	1	8
IDYYGGMVK	CG8947-PA	1a	gi|20428641	1	83
IEAPLAPVVAPVYSQPR	CG1478-PA	1a	gi|17530857	1	33
IEGGTEYHYTTVTSEGIVK	CG9480-PA	1a	gi|45550476	1	39
IEGTDHNAIISEHNDLGNGR	CG10540-PA	1a	gi|19922662	1	3
IEIGLFGK	CG2852-PA	1a	gi|20130249	1	39
IELLAQQR	CG3011-PA	1a	gi|24640005	1	8
IELYAEK	CG6779-PA	1a	gi|17136324	1	63
IESIVGEQAGSIK	CG8993-PA	1a	gi|21358065	1	12
IESLLSPEIVSK	CG5590-PA	1a	gi|21357673	1	55
IFAPDNIVAK	CG6510-PA	1a	gi|17647885	1	10
IFDHFDVGTEMK	CG10236-PA	1a	gi|17136292	0	274
IFEFFGMNK	CG6988-PA	1a	gi|17647799	1	73
IFEGTNDILR	CG7461-PA	1a	gi|24655582	1	96
IFEGVNVESPR	CG31450-PA	1a	gi|24645087	0	2
IFNGTTMSGR	CG15304-PA	1a	gi|21358399	1	4
IFSGSDLQNWSELR	CG32702-PA	1a	gi|24640838	0	276
IGDIVDIK	CG12775-PA	1a	gi|20129705	1	14
IGDVDGIESLGLLDDTPVVK	CG7144-PA	1a	gi|23397395	1	2
IGFLGGGNMAK	CG5840-PA	1a	gi|21358587	0	28
IGGSLFDEEGSK	CG3127-PA	1a	gi|17136394	1	3
IGKDELVQSPDAK	CG2107-PA	1a	gi|24656312	1	11
IGKPHTVPCK	CG5920-PA	1a	gi|17136734	1	30
IGLCAFSGYK	CG9282-PA	1a	gi|19921254	1	7
IGNVAMSAAEDLVR	CG4302-PA	1a	gi|19922680	1	16
IGQPCEDIYEESR	CG3373-PA	1a	gi|17137194	1	26
IGSITNDCNVTTGECK	CG10236-PA	1a	gi|17136292	0	274
IGTLVGIDK	CG3214-PA	1a	gi|24581165	1	13
IIAIDVNDPLASK	CG4634-PA	1a	gi|45549187	1	4
IIDGLKENEAK	CG11151-PA	1a	gi|18859687	1	20
IIDLHSPSEIVK	CG15693-PA	1a	gi|17738077	1	5
IIDQCLNQMPAGEIK	CG1970-PA	1a	gi|24638644	1	45
IIECSSGNASIDDLE	CG7654-PA	1a	gi|28574622	0	12
IIEVGDTPK	CG9539-PA	1a	gi|19920826	1	8
IIIANGQNPISQR	CG13506-PA	1a	gi|22026914	0	4
IILPEGSSDIR	CG33303-PA	1a	gi|45552315	1	7
IINVIGEPIDER	CG11154-PA	1a	gi|24638766	1	585
IISRYSSDGGLIK	CG4169-PA	1a	gi|24665395	0	151
IITSSQSTQITVQGSDKK	CG10361-PA	1a	gi|24662918	0	1
IIVANSGSL	CG9916-PA	1a	gi|45549139	1	25
IKEEACVEVQPQSDETR	CG3524-PA	1a	gi|24581345	1	30
IKNIVELLK	CG12455-PA	1a	gi|24584558	0	2
IKPSVIYQQEVINK	CG1478-PA	1a	gi|17530857	0	33
ILAAFFFPGK	CG4302-PA	1a	gi|19922680	1	16
ILAAPINPADINTIQGK	CG16935-PA	1a	gi|45550423	1	24
ILAEAEAAQAER	CG11915-PA	1a	gi|21355931	0	1
ILAVGELVSNK	CG17560-PA	1a	gi|24647494	0	24
ILCDYQSPAPGKPLPSIR	CG32702-PA	1a	gi|24640838	0	276
ILDFVLPR	CG7910-PA	1a	gi|24644968	0	90
ILDPGLNILVPVADK	CG2970-PA	1a	gi|45550506	1	4
ILEELIEEVDEDK	CG7930-PA	1a	gi|24665772	1	40
ILETVEDIQER	CG1977-PA	1a	gi|17136504	1	127
ILGGGSSGSPQK	CG6746-PA	1a	gi|19921166	1	5
ILIAQDPNLEELAK	CG6028-PA	1a	gi|28572127	1	3
ILILGLDGAGK	CG6025-PA	1a	gi|24664933	1	2
ILIQGNASGSDESSAER	CG13163-PA	1a	gi|85726431	1	1
ILLTNDLTEPVVK	CG4278-PA	1a	gi|19921430	1	2
ILNDGEDHVVTVQHTQGELR	CG10236-PA	1a	gi|17136292	1	274
ILNDWDESCDGCLEK	CG7013-PA	1a	gi|17137698	1	6
ILNSLAEAGQPER	CG10302-PA	1a	gi|24584970	1	7
ILNVSINR	CG9031-PA	1a	gi|45550188	1	15
ILQESLGGNAR	CG7765-PA	1a	gi|17136240	1	4
ILTDYGFEGHPQR	CG12079-PA	1a	gi|24656494	1	22
ILVNDPK	CG14028-PA	1a	gi|24581914	0	35
IMDPNIIGQEHYNVAR	CG11154-PA	1a	gi|24638766	1	585
IMSRPK	CG6984-PA	1a	gi|19922422	0	2
INASELQAALVNGR	CG17765-PA	1a	gi|19921976	1	1
INDGIYDFTSFIDK	CG13279-PA	1a	gi|17137186	0	9
INEDLPLISIPQER	CG32702-PA	1a	gi|24640838	0	276
INKLEDQK	CG7178-PA	1a	gi|24642961	0	39
INQSEGGLDGFSTAYK	CG33138-PA	1a	gi|28573410	1	1
INTILK	CG4087-PA	1a	gi|17136320	0	15
INTLLQVADTLVEK	CG5870-PA	1a	gi|17647191	1	77
INVEDIQDWLK	CG11527-PA	1a	gi|17136984	1	36
IPCDDEQVIIK	CG11592-PA	1a	gi|19920458	0	27
IPDMFTIAK	CG32092-PB	1a	gi|24662922	0	88
IPDVYGVYQFK	CG9022-PA	1a	gi|24640745	1	15
IPGLLAALDATK	CG9302-PA	1a	gi|24584105	1	1
IPIENVLGK	CG7461-PA	1a	gi|24655582	1	96
IPINNTEENLVLLQK	CG17374-PA	1a	gi|62862516	1	17
IPLITEK	CG33484-PD	1a	gi|116007762	0	226
IPPPSKPLDDLSEAK	CG6779-PA	1a	gi|17136324	1	63
IPQLFR	CG5590-PA	1a	gi|21357673	0	55
IPSAVGYQPTLATDMGSMQER	CG11154-PA	1a	gi|24638766	1	585
IPTIGTQLK	CG3299-PA	1a	gi|17136646	0	99
IPVADGNPLTK	CG10849-PA	1a	gi|24657023	1	63
IPVDHNLALYEGPEQR	CG12140-PA	1a	gi|24652256	1	51
IQEGVFDINNEANGIK	CG3269-PA	1a	gi|17137088	1	17
IQGPQPVPGQIK	CG5254-PA	1a	gi|24638958	1	13
IQTTPGFAK	CG9090-PA	1a	gi|24656137	0	119
IREENVEDPEVVAR	CG15871-PA	1a	gi|24641946	1	3
ISADYDVLLDK	CG5826-PA	1a	gi|17738015	1	23
ISIPVFK	CG12140-PA	1a	gi|24652256	0	51
ISLAEEGVR	CG9090-PA	1a	gi|24656137	0	119
ISLGLPVGAVMNCADNTGAK	CG3661-PA	1a	gi|17647883	1	10
ISLPIFAQGNGIPDQGVK	CG3322-PA	1a	gi|17737557	1	130
ISNALTQLSTTEK	CG8282-PA	1a	gi|19920922	1	3
ISPGEPFPECCK	CG15203-PA	1a	gi|24641174	0	2
ISSNDDEDDDAE	CG7434-PA	1a	gi|17137152	1	17
ISSVNLTEPQR	CG6831-PA	1a	gi|21355751	1	106
ISTYNNDSLPIIK	CG6092-PA	1a	gi|21356893	1	1
ISVPAGGSLR	CG32092-PB	1a	gi|24662922	0	88
ITAFVPR	CG8415-PA	1a	gi|22024141	1	7
ITEADLNEYR	CG5073-PA	1a	gi|24647146	0	1
ITEIYEGTSEIQR	CG4703-PA	1a	gi|21356377	1	12
ITEVESLDANLQK	CG2774-PA	1a	gi|24581429	1	2
ITHQLELSR	CG13506-PA	1a	gi|22026914	0	4
ITTHYTLNPR	CG12140-PA	1a	gi|24652256	1	51
ITYFSSCLSNGPEVQTSK	CG1560-PA	1a	gi|24640486	1	17
ITYTELYK	CG6821-PA	1a	gi|17647601	1	120
IVACEIALSAAATAQNAK	CG6455-PA	1a	gi|45549224	1	49
IVALEMAPQGVR	CG3699-PA	1a	gi|23397609	1	23
IVALLAQGR	CG6115-PA	1a	gi|24584758	1	1
IVDTLMLCGMEAK	CG32702-PA	1a	gi|24640838	0	276
IVFVPK	CG4769-PA	1a	gi|24658292	0	37
IVGNYLQGNADTFDK	CG6821-PA	1a	gi|17647601	1	120
IVGSFLIGDK	CG7920-PA	1a	gi|21358615	1	100
IVHTVTTTDDPVIR	CG10161-PB	1a	gi|24649360	1	2
IVPSENPGDVTTVETIK	CG9480-PA	1a	gi|45550476	1	39
IVQDFMDVSTPLK	CG3299-PA	1a	gi|17136646	1	99
IVQIQQVGPAHLNVK	CG4463-PA	1a	gi|17737553	1	4
IVQTIWDQR	CG12846-PA	1a	gi|17648065	1	5
IVVLGSGGVGK	CG1956-PA	1a	gi|17136706	1	19
IVYVGDDTTDEDAIK	CG5177-PA	1a	gi|20129309	1	22
IWYTQLFAK	CG3132-PA	1a	gi|24646169	1	41
IYATATCGQDTDGPELYCK	CG10236-PA	1a	gi|17136292	0	274
IYDEFVER	CG3752-PA	1a	gi|20129399	1	178
IYEGTEPQGTPR	CG32702-PA	1a	gi|24640838	0	276
IYETPETEYK	CG6779-PA	1a	gi|17136324	1	63
IYQIYEGTSQIQR	CG12262-PA	1a	gi|24660351	1	112
IYSELEAIVDK	CG8604-PA	1a	gi|17647155	1	3
IYSGQLINSER	CG9629-PA	1a	gi|24666674	1	21
IYTLTLEEGGFYK	CG13279-PA	1a	gi|17137186	1	9
IYYGTLAPR	CG7506-PA	1a	gi|28574956	0	1
KAAYADFYSK	CG14028-PA	1a	gi|24581914	1	35
KADQSAVTASSGSGTSSPPAGQPPLK	CG13865-PA	1a	gi|116007256	1	9
KAELLQQGIDVR	CG8186-PA	1a	gi|21355551	1	10
KAGGEAVADYNSVIDGAK	CG3415-PA	1a	gi|18859837	1	76
KDETITAPTSLTTEDFANPSPK	CG6008-PA	1a	gi|21356773	1	7
KDPIAGVVPLQPAPNR	CG3415-PA	1a	gi|18859837	1	76
KDYEINDLNAQVNDLR	CG7178-PB	1a	gi|24642959	1	54
KEETVQDPQR	CG5499-PA	1a	gi|17738227	1	36
KEGLRDDLDDIDENDVGAK	CG3972-PA	1a	gi|17933498	1	601
KENFQEESR	CG3972-PA	1a	gi|17933498	0	601
KFEAAEAHSSGLVSR	CG9577-PA	1a	gi|19920382	1	15
KFEALISDLTQK	CG5870-PA	1a	gi|17647191	1	77
KGEDEPLEDTAISGSDAANKR	CG7962-PA	1a	gi|17864222	1	8
KGEEPTNYDDDEDEENVNNDEQER	CG9066-PA	1a	gi|18859969	1	38
KGEGEAHALCTSEYSDISPLR	CG3322-PA	1a	gi|17737557	1	130
KGGTQHLGLPVFASVAEAK	CG1065-PA	1a	gi|28574296	1	99
KGIEEEASK	CG9282-PA	1a	gi|19921254	1	7
KGPAVLSNLGR	CG3560-PA	1a	gi|24642430	1	35
KHEATLK	CG12859-PA	1a	gi|20130001	0	4
KIEAPLAPVVAPVYSQPR	CG1478-PA	1a	gi|17530857	1	33
KIESYGSQSGK	CG9916-PA	1a	gi|45549139	1	25
KIIVANSGSL	CG9916-PA	1a	gi|45549139	1	25
KIPVADGNPLTK	CG10849-PA	1a	gi|24657023	1	63
KIVFVPK	CG4769-PA	1a	gi|24658292	1	37
KIVLKVVK	CG2807-PA	1a	gi|45550087	0	1
KLCGDLGTVTALETK	CG2736-PA	1a	gi|19922958	0	4
KLDEVIER	CG3752-PA	1a	gi|20129399	1	178
KLDFGDAQEFVQR	CG33113-PF	1a	gi|28574660	1	56
KLDHYQTEIQGLK	CG15102-PA	1a	gi|24655327	1	8
KLGEAEPR	CG2109-PA	1a	gi|21357105	0	2
KLLEAAIPELK	CG7998-PA	1a	gi|24647881	1	156
KLLEAAIPELKK	CG7998-PA	1a	gi|24647881	1	156
KLPAEGSTGDNPNANADEMTSR	CG6554-PA	1a	gi|21356361	1	2
KLPSEKEPQTPLYK	CG6510-PA	1a	gi|17647885	1	10
KMAAAAK	CG10223-PA	1a	gi|17136538	0	1
KNNCGVMTMPTYVEM	CG8947-PA	1a	gi|20428641	1	83
KNPADYANDE	CG7580-PA	1a	gi|21355243	1	6
KPAEVTEDEYTSFYK	CG5520-PA	1a	gi|21357739	1	116
KPAIVSVDPWDGK	CG5809-PA	1a	gi|19921434	1	15
KPGSIATER	CG7596-PA	1a	gi|17738017	1	42
KPLPDNVSVVEPK	CG6779-PA	1a	gi|17136324	1	63
KPMTDDVTGEPLIR	CG3140-PA	1a	gi|22026816	1	6
KQCVPGDEGYPK	CG13240-PA	1a	gi|19921400	1	25
KQEQLTDEYR	CG30000-PA	1a	gi|21686985	1	12
KQPQLTTMETSFK	CG33484-PD	1a	gi|116007762	0	226
KSGIVIDDLNER	CG6917-PA	1a	gi|28574499	1	29
KSSVDSTDSTESSR	CG9480-PA	1a	gi|45550476	0	39
KSVVELVTQLR	CG7910-PA	1a	gi|24644968	0	90
KTGQAAGFAYTDANK	CG17903-PA	1a	gi|17137228	1	23
KTVEELRPEVVSPTSK	CG7111-PA	1a	gi|17137396	1	29
KVAAEEAASGDGAPPASVSGDGQK	CG5482-PA	1a	gi|19922556	1	13
KVGLAEAATSTVNPTTAYR	CG16935-PA	1a	gi|45550423	1	24
LAAVNPISIR	CG1544-PA	1a	gi|24651589	0	3
LADDSSLLLSK	CG9022-PA	1a	gi|24640745	1	15
LADQFIEK	CG7910-PA	1a	gi|24644968	0	90
LADQLELK	CG7470-PA	1a	gi|21357643	1	101
LADTLAGYTQQTR	CG3524-PA	1a	gi|24581345	0	30
LAEDGAAVVISSR	CG10672-PA	1a	gi|21355319	1	22
LAEEAAAQK	CG6544-PA	1a	gi|45550732	1	44
LAEIEKESEGELAR	CG6544-PA	1a	gi|45550732	1	44
LAELPYYQEVNGDGADELK	CG16936-PA	1a	gi|19922932	1	3
LAETTDQYTSPPTK	CG5167-PA	1a	gi|24646278	1	6
LAFFLAILVGGSRLLGGFGNK	CG1155-PA	1a	gi|21357651	0	1
LAFNCVGGK	CG16935-PA	1a	gi|45550423	1	24
LAFVVR	CG4897-PA	1a	gi|24583248	0	13
LAGFQSDVQR	CG3322-PA	1a	gi|17737557	1	130
LAGGLSTQNSTAFAIAR	CG4169-PA	1a	gi|24665395	1	151
LAGSEDNAESK	CG6767-PB	1a	gi|45551540	0	5
LALEMQDEVKK	CG13865-PA	1a	gi|116007256	0	9
LALLDAMVEMAK	CG3972-PA	1a	gi|17933498	1	601
LANALQPGSIK	CG14996-PB	1a	gi|21355917	1	7
LANQSNIAQVLSELK	CG12532-PA	1a	gi|17647183	1	19
LAPGGHVGR	CG5502-PA	1a	gi|24650747	1	19
LAPITYPQGLAMAK	CG2248-PA	1a	gi|17136856	1	21
LAQELLMSLSMR	CG7470-PA	1a	gi|21357643	1	101
LAQEQIQPLVK	CG3902-PA	1a	gi|24666513	1	54
LAQFVDDGGNVLVAGSEK	CG9022-PA	1a	gi|24640745	1	15
LASGPYTVPK	CG3972-PA	1a	gi|17933498	1	601
LASIVEQVAECHLEGR	CG7470-PA	1a	gi|21357643	1	101
LAVGAIGHLANVPYASDLA	CG4169-PA	1a	gi|24665395	1	151
LAYEPIEPYVSTR	CG6544-PB	1a	gi|24645759	1	2
LCEAICPAQAITIEAEER	CG3944-PA	1a	gi|17864306	1	8
LCGGIISR	CG32702-PA	1a	gi|24640838	0	276
LCGSGFQSIVNGAQDILVGGAK	CG4600-PA	1a	gi|17648125	1	82
LCGSSEITLSADGTK	CG32702-PA	1a	gi|24640838	0	276
LCSSNPHDSDNQNALR	CG6831-PA	1a	gi|21355751	1	106
LDAEPESSK	CG1715-PA	1a	gi|21358165	0	5
LDAQGNSISK	CG12918-PA	1a	gi|20129845	1	7
LDDWQQQQEER	CG11527-PA	1a	gi|17136984	0	36
LDEECSWLVTSPEGSK	CG32092-PB	1a	gi|24662922	0	88
LDESYYLHR	CG1977-PA	1a	gi|17136504	1	127
LDEVEDVLTTNR	CG1970-PA	1a	gi|24638644	1	45
LDEVIER	CG3752-PA	1a	gi|20129399	1	178
LDGYELEAR	CG11064-PA	1a	gi|24638795	1	17
LDHCVSDVLIK	CG41128-PA	1a	gi|161076204	1	4
LDLSNLDSK	CG30498-PA	1a	gi|24586303	1	3
LDLTVNCAGTATAVK	CG7113-PA	1a	gi|17737361	1	94
LDNDSSNVVELVK	CG1560-PA	1a	gi|24640486	1	17
LDNDTANESQGNVQTGSAFR	CG4225-PA	1a	gi|21357907	1	13
LDSIYK	CG3972-PA	1a	gi|17933498	0	601
LDYDLK	CG3972-PA	1a	gi|17933498	0	601
LEAELGSHEPAIQAVQEAGEK	CG1977-PA	1a	gi|17136504	1	127
LEASGDYSFTDR	CG4157-PA	1a	gi|21357229	1	4
LEDESIYSFAER	CG5796-PA	1a	gi|24649745	0	1
LEDQKYDLEYVVK	CG7178-PA	1a	gi|24642961	1	39
LEDVVASIQK	CG6439-PA	1a	gi|24648872	1	38
LEEEQQAALPR	CG3524-PA	1a	gi|24581345	0	30
LEGCHTYDESLPSK	CG1371-PA	1a	gi|20129847	1	13
LELADGYQPTLK	CG3523-PA	1a	gi|19920632	1	105
LELAQYR	CG3612-PA	1a	gi|24658560	1	476
LENGFNVSLEK	CG3972-PA	1a	gi|17933498	0	601
LENGTIVNLSSIVAK	CG3603-PA	1a	gi|24639444	0	23
LEPPNPQLCAQR	CG4115-PA	1a	gi|24646246	0	5
LEQEEELMER	CG32702-PA	1a	gi|24640838	0	276
LEQNLIQGPSK	CG33484-PD	1a	gi|116007762	0	226
LEQPGSVDLNAER	CG10236-PA	1a	gi|17136292	0	274
LESEKYDFEYDVAR	CG7178-PB	1a	gi|24642959	0	54
LESLVGDLIK	CG8542-PA	1a	gi|24653595	1	38
LESTIGQK	CG8947-PA	1a	gi|20428641	0	83
LETTPEECLPEQDSESK	CG31842-PA	1a	gi|24584213	1	2
LFDEDGYANVR	CG9035-PA	1a	gi|19922030	1	18
LFGVSTLDVVR	CG7998-PA	1a	gi|24647881	1	156
LFNALAADK	CG1751-PA	1a	gi|24641313	0	8
LFQMVR	CG3214-PA	1a	gi|24581165	0	13
LFSQDVR	CG7970-PA	1a	gi|21358267	0	5
LFTDFK	CG32092-PB	1a	gi|24662922	0	88
LFTDILFK	CG6917-PA	1a	gi|28574499	1	29
LFVSNLLK	CG1787-PA	1a	gi|17933586	0	29
LFYELSVPK	CG9603-PA	1a	gi|24645039	1	11
LGALDATAHQSK	CG5809-PA	1a	gi|19921434	1	15
LGALGFMSLK	CG1112-PA	1a	gi|17737817	1	17
LGALLPK	CG6821-PA	1a	gi|17647601	0	120
LGASDEAVYEAAR	CG4225-PA	1a	gi|21357907	1	13
LGCQITLSK	CG1319-PA	1a	gi|24657492	1	3
LGDEQTLQQFSR	CG1977-PA	1a	gi|17136504	1	127
LGDGLFLR	CG6439-PA	1a	gi|24648872	1	38
LGITTAEISDGYEK	CG8258-PA	1a	gi|19921848	1	1
LGMDFVK	CG16985-PA	1a	gi|21357897	0	5
LGPLGFVSTGDR	CG6917-PA	1a	gi|28574499	0	29
LGPNYLQIPVNCPYK	CG6871-PA	1a	gi|17981717	1	74
LGQLILAGSSISK	CG11592-PA	1a	gi|19920458	0	27
LGTDEEVFNR	CG9579-PA	1a	gi|17136288	1	21
LGTLENIK	CG11920-PA	1a	gi|24649922	0	10
LGVYESDYESDR	CG33484-PD	1a	gi|116007762	0	226
LGYLKPETVEIAR	CG5958-PA	1a	gi|24582499	1	8
LGYVVYR	CG9034-PA	1a	gi|21358417	1	3
LIAENLVK	CG7920-PA	1a	gi|21358615	0	100
LIAGTFAESGAAIPDEK	CG3200-PA	1a	gi|19923000	0	2
LIDASDLK	CG10484-PA	1a	gi|17137450	0	2
LIDGQHYAADDVAQR	CG1977-PA	1a	gi|17136504	1	127
LIDQLPAESQR	CG10236-PA	1a	gi|17136292	1	274
LIEEQNLDR	CG7319-PC	1a	gi|45553069	1	4
LIEEVPPK	CG8680-PA	1a	gi|20129243	0	2
LIEVGNNGVAAGGR	CG11064-PA	1a	gi|24638795	1	17
LIEVGQQIDPIVEVTSLAGK	CG11949-PA	1a	gi|24655527	1	43
LIGEFQLLQGK	CG6638-PA	1a	gi|21355753	1	3
LILHTDSAINGR	CG32702-PA	1a	gi|24640838	0	276
LINEGENEYNLGK	CG2101-PA	1a	gi|17647689	1	1
LIPADVAAGSIIEAQR	CG2254-PA	1a	gi|24640492	1	15
LIQLAPALR	CG8905-PA	1a	gi|17136812	1	7
LIQLASGNTNLK	CG3752-PA	1a	gi|20129399	1	178
LISFYK	CG9140-PA	1a	gi|19920794	0	22
LISTANAAKPVAPYNQAVVADR	CG15261-PA	1a	gi|19921376	1	10
LIVAQINPK	CG7920-PA	1a	gi|21358615	1	100
LKDPFSVYR	CG3283-PA	1a	gi|17137106	0	39
LKPQEQLTLEPYER	CG9888-PA	1a	gi|17647425	1	1
LKQEQEAALAEAEK	CG5844-PA	1a	gi|21357171	1	4
LKQSLQELR	CG6944-PA	1a	gi|17136290	0	15
LLAYDPDNDCK	CG7104-PA	1a	gi|24582628	0	1
LLDAEDVFVEHPDEK	CG5870-PA	1a	gi|17647191	1	77
LLDDDLR	CG33950-PF	1a	gi|78706474	0	871
LLDNAAYAPEVQK	CG12108-PA	1a	gi|24640652	1	2
LLDPNSVDLSPSK	CG10236-PA	1a	gi|17136292	1	274
LLDSAIPSEK	CG9327-PA	1a	gi|17136420	1	5
LLDSYDLQR	CG1977-PA	1a	gi|17136504	1	127
LLDVDNR	CG34069-PA	1a	gi|5835236	0	20
LLEAAIPELK	CG7998-PA	1a	gi|24647881	1	156
LLEAAIPELKK	CG7998-PA	1a	gi|24647881	1	156
LLEDEVR	CG9762-PA	1a	gi|21356475	0	39
LLEELDQGQK	CG10640-PA	1a	gi|21355265	1	5
LLEEPLVAAYCVTEPGAGSDVSGIK	CG12262-PA	1a	gi|24660351	1	112
LLELASR	CG2076-PA	1a	gi|24641180	0	13
LLFDSVR	CG2233-PA	1a	gi|18921139	0	24
LLHLDVTSEK	CG8888-PA	1a	gi|19922066	1	64
LLLPGLAAYNTPENVAK	CG31478-PA	1a	gi|28571728	1	1
LLMAQFGDK	CG13480-PA	1a	gi|24664203	0	2
LLNIDVPLR	CG1970-PA	1a	gi|24638644	1	45
LLNSDYAFR	CG11999-PA	1a	gi|24644197	1	6
LLNVISSGENMLK	CG1977-PA	1a	gi|17136504	1	127
LLPGNIVYGGPVTER	CG6178-PA	1a	gi|21355181	1	15
LLPVSAVESIDSTFK	CG1915-PC	1a	gi|161080703	0	363
LLQTIQDNGVSFK	CG12373-PA	1a	gi|20129927	0	6
LLQTPLAQGDPELAELIK	CG3011-PA	1a	gi|24640005	1	8
LLSGLASKPAPK	CG3283-PA	1a	gi|17137106	1	39
LLTMAGIEDCYTSAR	CG5920-PA	1a	gi|17136734	1	30
LLTSADIEDGKVEFDK	CG9480-PA	1a	gi|45550476	1	39
LLTVNEEALDEVDLEK	CG6544-PA	1a	gi|45550732	1	44
LLVGSDDYGR	CG1977-PA	1a	gi|17136504	1	127
LLVIGESGVGK	CG3129-PA	1a	gi|24639915	0	2
LMDVSNLGVPEIEQR	CG1977-PA	1a	gi|17136504	1	127
LMGPPSANAYSMGK	CG2076-PA	1a	gi|24641180	1	13
LMHTYTSDDSNSIEFGK	CG7470-PA	1a	gi|21357643	1	101
LMQEPVPGINAIPDENNAR	CG18319-PA	1a	gi|17530929	1	1
LMSDPVVFD	CG5596-PB	1a	gi|17136340	1	40
LNAEGVFAK	CG3523-PA	1a	gi|19920632	1	105
LNDLFGTWK	CG5502-PA	1a	gi|24650747	1	19
LNEACQQQQFNR	CG1977-PA	1a	gi|17136504	1	127
LNELLATPIFNER	CG1591-PA	1a	gi|18860055	1	2
LNIEQLTAWQR	CG11527-PA	1a	gi|17136984	0	36
LNITPATNTATVQSFSQSLR	CG6944-PA	1a	gi|17136290	1	15
LNLLNLSNIR	CG32092-PB	1a	gi|24662922	0	88
LNPDGSESR	CG16757-PA	1a	gi|24656102	0	5
LNPPTFTSEFNR	CG32702-PA	1a	gi|24640838	0	276
LNPQAAFMK	CG11151-PA	1a	gi|18859687	1	20
LNPYAEVLK	CG5502-PA	1a	gi|24650747	0	19
LNQQLTFGPPAAK	CG7470-PA	1a	gi|21357643	1	101
LNRPLTLSEK	CG9244-PB	1a	gi|17864292	1	473
LNSFICPGTPIGGLHPAR	CG6020-PA	1a	gi|24667554	1	2
LNSMGSQLVIDDR	CG10236-PA	1a	gi|17136292	1	274
LNTFGDELFGDSQVLK	CG3322-PA	1a	gi|17737557	1	130
LNYYDQLADELEPK	CG10236-PA	1a	gi|17136292	1	274
LPADTSSCFVNATNK	CG5107-PA	1a	gi|21356733	1	9
LPAFAFSR	CG9159-PA	1a	gi|17737397	1	7
LPANLLQAQR	CG3724-PA	1a	gi|24639279	1	1
LPEGDTTLQEISQQLAER	CG12151-PA	1a	gi|18858005	1	1
LPEGLGGVGIGLGPNGEPLR	CG9373-PA	1a	gi|24645384	1	1
LPEKIEPK	CG1915-PC	1a	gi|161080703	0	363
LPEQPNFDVDFTEAGYR	CG10236-PA	1a	gi|17136292	0	274
LPESSNIEEFK	CG3524-PA	1a	gi|24581345	0	30
LPESSTIEEFK	CG3523-PA	1a	gi|19920632	1	105
LPGTIYSAAEEIEK	CG5590-PA	1a	gi|21357673	1	55
LPIGDVATQYFADR	CG8351-PA	1a	gi|24645179	1	4
LPIPLLENSCR	CG2107-PA	1a	gi|24656312	1	11
LPLDATAAQPVIK	CG2046-PA	1a	gi|21357311	1	2
LPLVIATR	CG2803-PA	1a	gi|24762794	1	4
LPMALTAENLADQYK	CG4600-PA	1a	gi|17648125	1	82
LPNEQPWDEK	CG12373-PA	1a	gi|20129927	0	6
LPPETCFR	CG12845-PA	1a	gi|22026781	0	13
LPQPLNLER	CG9938-PA	1a	gi|18860017	0	2
LPSDVDR	CG31352-PA	1a	gi|45550723	0	3
LPSTDSVYTLLK	CG4104-PA	1a	gi|19920676	1	24
LPVVDVR	CG1320-PA	1a	gi|17647675	0	5
LPYDYAALEPIICR	CG8905-PA	1a	gi|17136812	1	7
LQAASEESYRDPTNLQAK	CG1977-PA	1a	gi|17136504	1	127
LQDEATTAAQPAANGVK	CG13920-PA	1a	gi|21358265	1	8
LQDQGLIEMQK	CG11527-PA	1a	gi|17136984	0	36
LQEASTTSAPIYR	CG15386-PA	1a	gi|24581044	1	5
LQEEERER	CG3922-PB	1a	gi|17647889	0	11
LQELSNTYNVK	CG11527-PA	1a	gi|17136984	1	36
LQEPLLLLGK	CG4046-PA	1a	gi|19922746	1	48
LQEQGVPFQK	CG3902-PA	1a	gi|24666513	1	54
LQGTDPEDVIK	CG3595-PA	1a	gi|17530815	1	4
LQINSLPVK	CG10236-PA	1a	gi|17136292	0	274
LQIYTPPPPPSGSDK	CG6094-PA	1a	gi|19921098	1	6
LQLATEESYKDPANIQSK	CG1977-PA	1a	gi|17136504	1	127
LQMEGASSR	CG7772-PA	1a	gi|18859915	0	1
LQNLEDTNAGLNAR	CG10119-PA	1a	gi|24653664	1	59
LQPGNPEATLSLK	CG12532-PA	1a	gi|17647183	0	19
LQQEGNYDIVSGTR	CG10166-PA	1a	gi|24585265	1	4
LQQQLNVYNR	CG33950-PF	1a	gi|78706474	0	871
LQQSLQELR	CG10119-PA	1a	gi|24653664	0	59
LQQSQPDPAEEQK	CG32267-PA	1a	gi|24656869	1	1
LQQTSAEEFLDR	CG10340-PA	1a	gi|45550758	1	1
LQSIQQK	CG4703-PA	1a	gi|21356377	0	12
LQVDPAK	CG9090-PA	1a	gi|24656137	0	119
LREDANQQYPTEGDCLNVGVK	CG32702-PA	1a	gi|24640838	0	276
LRHTWR	CG8728-PA	1a	gi|19921772	0	4
LSAGLMGANEPNQDGQR	CG7113-PA	1a	gi|17737361	1	94
LSAWEIDQGR	CG12262-PA	1a	gi|24660351	1	112
LSDYFPSPYPNEEAAR	CG4769-PA	1a	gi|24658292	1	37
LSELVLSDSR	CG3299-PA	1a	gi|17136646	1	99
LSETCFTDCIR	CG1660-PA	1a	gi|18860073	1	1
LSIENLDLAGK	CG3127-PA	1a	gi|17136394	1	3
LSMNEIMIMAR	CG7625-PA	1a	gi|24668198	1	3
LSPFEQR	CG7580-PA	1a	gi|21355243	0	6
LSQLDQVEK	CG4307-PA	1a	gi|24647054	1	64
LSQTYQSALDR	CG11857-PA	1a	gi|21356291	1	11
LSTGEGYLQSR	CG32092-PB	1a	gi|24662922	0	88
LSTSTVDTVEDFWR	CG11236-PA	1a	gi|19920852	0	2
LSVVPVR	CG5920-PA	1a	gi|17136734	0	30
LTAAQQFACISGTNDLK	CG9914-PA	1a	gi|45549573	1	3
LTCSLMMK	CG8922-PA	1a	gi|17647897	1	10
LTDVINDIQR	CG6984-PA	1a	gi|19922422	0	2
LTECFAFGDK	CG4800-PA	1a	gi|24645861	1	17
LTEESLNTDAANVEK	CG34228-PA	1a	gi|161076551	0	4
LTEGCSFR	CG10423-PA	1a	gi|24649976	1	11
LTEMDIFK	CG3322-PA	1a	gi|17737557	0	130
LTESLLESGVLK	CG6415-PA	1a	gi|20129441	1	10
LTFAAANK	CG2968-PA	1a	gi|18858089	1	22
LTFQVEAE	CG5793-PA	1a	gi|28571789	0	14
LTGADVELTK	CG6459-PA	1a	gi|20130085	1	11
LTGGLAVR	CG6779-PA	1a	gi|17136324	0	63
LTGGNANAAEQNAQQK	CG10373-PA	1a	gi|24585024	1	3
LTIEVQTTR	CG6944-PA	1a	gi|17136290	1	15
LTLGSLLGSLDR	CG5379-PA	1a	gi|116008410	0	1
LTLLSTEGR	CG9092-PA	1a	gi|24582088	0	20
LTLYGLDPSPPVR	CG17530-PA	1a	gi|19922532	1	3
LTMTCDPIHR	CG2233-PA	1a	gi|18921139	0	24
LTNWQEVER	CG11527-PA	1a	gi|17136984	1	36
LTQELNLAQDTVNR	CG10119-PA	1a	gi|24653664	1	59
LTQGNCTPVPSTNPHAEYPR	CG2081-PB	1a	gi|24641178	0	1
LTQIFLPLVR	CG8888-PA	1a	gi|19922066	0	64
LTSEGSTSDDPQYMFLR	CG5870-PA	1a	gi|17647191	1	77
LTTCCSLLSSEAR	CG3132-PA	1a	gi|24646169	1	41
LTVDDVDNKR	CG10236-PA	1a	gi|17136292	0	274
LVADFFNK	CG5377-PA	1a	gi|24649021	0	6
LVAIVDVIDQNR	CG6253-PA	1a	gi|17647881	1	31
LVATNIADPAAAAAWK	CG3299-PA	1a	gi|17136646	1	99
LVDDVIYEVYGK	CG4800-PA	1a	gi|24645861	1	17
LVDPLLEAVK	CG6831-PA	1a	gi|21355751	1	106
LVEGMEGISDDER	CG13210-PA	1a	gi|24652684	1	1
LVEHIQGSSAAK	CG1560-PA	1a	gi|24640486	1	17
LVETLLQR	CG10504-PA	1a	gi|24667933	0	3
LVGGISPK	CG1065-PA	1a	gi|28574296	0	99
LVGNRSLGAR	CG1140-PA	1a	gi|21358325	0	10
LVGPNCPGIIAPEQCK	CG1065-PA	1a	gi|28574296	1	99
LVNDFFDTGVDTDKS	CG2254-PA	1a	gi|24640492	1	15
LVNQPSVDMELTR	CG3663-PA	1a	gi|19922924	1	3
LVPLEQTIK	CG11154-PA	1a	gi|24638766	1	585
LVPTVSYISDAINQTK	CG5009-PA	1a	gi|24654595	1	7
LVQAAPAK	CG6463-PA	1a	gi|24662306	0	8
LVQHPNSYFMDVK	CG10423-PA	1a	gi|24649976	1	11
LVQITQTGPSSK	CG4533-PA	1a	gi|17737499	1	14
LVTAIDEADLAR	CG9946-PA	1a	gi|18860087	1	2
LVTPISGDCSEPGLGLSDGDR	CG13091-PA	1a	gi|19920962	0	37
LVTPISGDCSEPGLGLSDGDRR	CG13091-PA	1a	gi|19920962	0	37
LVVATADATLPVSR	CG4169-PA	1a	gi|24665395	1	151
LVVVGAGGVGK	CG9375-PA	1a	gi|17136430	1	3
LVYDHQQPFGQSTIPR	CG11527-PA	1a	gi|17136984	1	36
LWDDGIIDPANTR	CG3267-PA	1a	gi|24586065	1	5
LWEASSDMR	CG1751-PA	1a	gi|24641313	1	8
LWEENDDLKPR	CG10119-PA	1a	gi|24653664	1	59
LWNTLAECK	CG7111-PA	1a	gi|17137396	1	29
LWTPTGVTGYTSDVEQK	CG33484-PD	1a	gi|116007762	0	226
LYAEQYAQAQR	CG15101-PA	1a	gi|20130139	1	2
LYDKIDPSK	CG9160-PA	1a	gi|17136934	1	4
LYEEVNTLVLPIK	CG10236-PA	1a	gi|17136292	0	274
LYGAVTPVK	CG8947-PA	1a	gi|20428641	1	83
LYTLCMTDPDAPSR	CG6180-PA	1a	gi|24583960	1	2
MADVSGFR	CG12918-PA	1a	gi|20129845	1	7
MAEGAQGTGQR	CG11137-PA	1a	gi|24668758	1	5
MAFLPTDGNDAQSSK	CG4157-PA	1a	gi|21357229	1	4
MANTDLSR	CG5502-PA	1a	gi|24650747	1	19
MDAASIGDLQLCK	CG1548-PA	1a	gi|21355083	1	32
MDAYNIIK	CG7977-PA	1a	gi|24655502	1	44
MEGPVAVEVAK	CG9914-PA	1a	gi|45549573	1	3
MEPLNNLQVAVK	CG12532-PA	1a	gi|17647183	1	19
MFAPIDPVK	CG16905-PA	1a	gi|24645536	0	2
MFTTEEALK	CG4598-PA	1a	gi|24583165	0	16
MGNALMELGR	CG2253-PA	1a	gi|24640488	1	1
MGPSTDPTAVVDPQLR	CG9512-PA	1a	gi|18859993	1	12
MGTLVTMAQK	CG31450-PA	1a	gi|24645087	1	2
MGVDQFTR	CG31548-PA	1a	gi|24644339	1	28
MIAPTFHQSILK	CG3972-PA	1a	gi|17933498	0	601
MIFAGLK	CG17903-PA	1a	gi|17137228	0	23
MITIDGKQIK	CG3269-PA	1a	gi|17137088	0	17
MKFMFPTVIK	CG9438-PA	1a	gi|17647305	0	2
MLDTDVITDYVK	CG3422-PA	1a	gi|17933602	1	6
MLGDLVDFLGK	CG9458-PA	1a	gi|24645542	0	5
MLTEELNLAK	CG6871-PA	1a	gi|17981717	1	74
MLYSSSFDALK	CG4254-PA	1a	gi|17136986	1	18
MMEFYER	CG1970-PA	1a	gi|24638644	1	45
MMGLDQEWYVEDK	CG6821-PA	1a	gi|17647601	1	120
MMNDPLEHATGIEK	CG11015-PA	1a	gi|20129279	1	18
MMNIILGMTSK	CG3972-PA	1a	gi|17933498	0	601
MNAKWDTGENPIYK	CG1560-PA	1a	gi|24640486	0	17
MNGLDAIPDEK	CG34439-PA	1a	gi|161077029	0	10
MNLSSIQDR	CG7891-PA	1a	gi|21355085	1	5
MNNVGQANYAATK	CG3603-PA	1a	gi|24639444	1	23
MPGSGGVLPPGAAFR	CG5167-PA	1a	gi|24646278	1	6
MPPSPNEDQIAK	CG5323-PA	1a	gi|20130125	1	3
MPQDASYR	CG6463-PA	1a	gi|24662306	0	8
MPRPPPPEMPESLK	CG9090-PA	1a	gi|24656137	1	119
MPRPPPPEMPESLKK	CG9090-PA	1a	gi|24656137	1	119
MQEENVTPNDAFLLK	CG10302-PA	1a	gi|24584970	1	7
MQTDILQFYK	CG13091-PA	1a	gi|19920962	0	37
MREPMEK	CG5377-PA	1a	gi|24649021	0	6
MSDELQEIIR	CG3299-PA	1a	gi|17136646	1	99
MSIEQAMK	CG3763-PA	1a	gi|17647419	1	1
MTAQEGVTAFYK	CG9090-PA	1a	gi|24656137	1	119
MTFVDGQYIWDK	CG6821-PA	1a	gi|17647601	1	120
MTQTDFSPEDPK	CG10242-PA	1a	gi|24653737	1	2
MVGLQDEDKIR	CG8993-PA	1a	gi|21358065	1	12
MYELIQIADPK	CG7920-PA	1a	gi|21358615	1	100
MYVYNLDDDACR	CG7809-PA	1a	gi|24667089	1	1
NAAETPVIYQR	CG4721-PA	1a	gi|24649148	0	1
NACFVVVDNK	CG3501-PA	1a	gi|19922774	1	6
NADFANTIIAETHK	CG4634-PA	1a	gi|45549187	1	4
NADSSLSEQEPTLR	CG8882-PA	1a	gi|17648041	1	6
NAEVEDTPALVNSSCYEK	CG7758-PA	1a	gi|17865652	1	15
NAFNAFDPEK	CG2981-PA	1a	gi|24585801	1	6
NANPPAEVVPPQAPAK	CG12079-PA	1a	gi|24656494	1	22
NAPSPGATSSLAIAK	CG10639-PA	1a	gi|24585081	1	14
NAQDDNPQVDEK	CG8320-PA	1a	gi|24653986	1	2
NAQEQQQQLK	CG11129-PA	1a	gi|24641865	1	2
NAQGFTTDESDTEYAYR	CG6831-PA	1a	gi|21355751	1	106
NAVSLVTGGASGLGR	CG7113-PA	1a	gi|17737361	1	94
NAVVTVPAYFNDSQR	CG8542-PA	1a	gi|24653595	1	38
NDDDDDRPSPPEEPAAGPR	CG4904-PA	1a	gi|17737405	1	12
NDDGVVVGQSR	CG6812-PA	1a	gi|24666596	1	3
NDIPYYETSAK	CG5915-PA	1a	gi|17865835	1	9
NDYQAYYYRPSVAK	CG9762-PA	1a	gi|21356475	1	39
NEAPAAGGCCSEAPLAEPR	CG7459-PA	1a	gi|21355095	1	1
NEIDSTYESSTEPSK	CG5597-PA	1a	gi|20130319	1	4
NEIGLSEPLESEEPYK	CG1915-PC	1a	gi|161080703	1	363
NEIQNEQIYTDLQCNANK	CG6186-PA	1a	gi|24643010	1	8
NELFYGLSPTGLGR	CG16965-PA	1a	gi|24583760	1	21
NELTTLPQNIFAK	CG18249-PA	1a	gi|24644981	0	1
NEPFEDFPLLGGK	CG5269-PA	1a	gi|17738047	1	3
NESYDIQGASHLLR	CG4169-PA	1a	gi|24665395	1	151
NEYTETIIAK	CG11888-PA	1a	gi|24650984	1	11
NFANSAGGCAFER	CG9306-PA	1a	gi|19921244	1	17
NFDLPFVPLR	CG4008-PA	1a	gi|17137568	1	7
NFFHSNYEGNDDEEQEIR	CG33950-PF	1a	gi|78706474	1	871
NFIASR	CG10373-PA	1a	gi|24585024	0	3
NFPDSYYINLK	CG10236-PA	1a	gi|17136292	1	274
NFPSVAASSYQEYK	CG2979-PA	1a	gi|161077703	1	2
NFTQVHADFGR	CG6871-PA	1a	gi|17981717	1	74
NGGNLVR	CG8947-PA	1a	gi|20428641	0	83
NGLGNSIYSPR	CG4169-PA	1a	gi|24665395	1	151
NGNDEDSPFLGR	CG32702-PA	1a	gi|24640838	1	276
NGQIGDQGPR	CG16858-PA	1a	gi|17137252	1	190
NGSGVPAGSAK	CG3663-PA	1a	gi|19922924	0	3
NGVQENLGLPK	CG7998-PA	1a	gi|24647881	1	156
NIDEHANEDVEK	CG17060-PA	1a	gi|17737369	1	2
NIDVPFVVPETQNEQAK	CG10302-PA	1a	gi|24584970	1	7
NIIHGSDAVESAEK	CG2210-PA	1a	gi|45549037	1	30
NIIIWGNHSSTQYPDAGQAK	CG5362-PA	1a	gi|24583394	1	4
NIQQVGGTLTTWGDR	CG4169-PA	1a	gi|24665395	1	151
NISGSDIDSYAPAK	CG7445-PA	1a	gi|17737667	1	10
NISNINTQLQDVQR	CG7359-PA	1a	gi|18921099	1	17
NIVNEQILLTR	CG7461-PA	1a	gi|24655582	1	96
NIVWIAECVAQK	CG2934-PA	1a	gi|18543319	1	3
NLASVTASDLDTVK	CG3989-PA	1a	gi|18860083	1	29
NLASVTASDLDTVKR	CG3989-PA	1a	gi|18860083	1	29
NLCSAFSDLLK	CG6831-PA	1a	gi|21355751	1	106
NLFETISK	CG2233-PA	1a	gi|18921139	0	24
NLLAIAATTEVEFK	CG7490-PA	1a	gi|17737731	1	43
NLLEGMNLVQAK	CG5012-PA	1a	gi|17864338	1	5
NLPVLNQECR	CG7350-PA	1a	gi|17737595	0	8
NLQAATSSHHR	CG7461-PA	1a	gi|24655582	1	96
NLQILGLR	CG9031-PA	1a	gi|45550188	0	15
NLSDASEDTIQSVCK	CG7178-PB	1a	gi|24642959	1	54
NLSDASEDTLK	CG7178-PA	1a	gi|24642961	1	39
NLVGVTHTEAEAK	CG4769-PA	1a	gi|24658292	1	37
NLVQNYDEQTNSTTTSER	CG9480-PA	1a	gi|45550476	1	39
NMNLEDADKIK	CG4097-PA	1a	gi|17737605	1	3
NNADFVAVSPLETVSFLK	CG9527-PA	1a	gi|45550141	1	3
NNAEQLGHAVGEISR	CG6831-PA	1a	gi|21355751	1	106
NNCGVMTMPTYVEM	CG8947-PA	1a	gi|20428641	0	83
NNEEDADLEDLSEVR	CG10616-PA	1a	gi|24663300	1	1
NNEIYTGIHGGEVIK	CG3373-PA	1a	gi|17137194	1	26
NNFGIPADDVPR	CG17374-PA	1a	gi|62862516	1	17
NNISAVEYCR	CG11781-PA	1a	gi|24649877	1	2
NNLEFLYNK	CG7830-PA	1a	gi|24582773	0	6
NNLSIEEIESK	CG11527-PA	1a	gi|17136984	1	36
NNNPAGQIPK	CG8602-PA	1a	gi|21356765	1	6
NNVLCNVIVPTAASR	CG3415-PA	1a	gi|18859837	1	76
NPDDISQEEYGEFYK	CG1242-PA	1a	gi|17647529	1	38
NPDIEWNEK	CG3972-PA	1a	gi|17933498	0	601
NPDVLVANR	CG3523-PA	1a	gi|19920632	1	105
NPEEADYSAPIYHPDGSK	CG4475-PA	1a	gi|19549546	1	5
NPEVADYAAPIYELSER	CG5210-PA	1a	gi|17137072	1	3
NPEVQVLTLK	CG14413-PA	1a	gi|17986025	1	3
NPIPPAEDPVALGDPGR	CG40451-PA	1a	gi|62862508	1	1
NPSANLGLIFK	CG7461-PA	1a	gi|24655582	1	96
NPSIHCLYDGK	CG8194-PA	1a	gi|24660529	0	6
NQFYVPAEAK	CG4897-PA	1a	gi|24583248	1	13
NQGDWSPTGGIGLPQPDNR	CG4115-PA	1a	gi|24646246	1	5
NQGQGLVIVAMQDDK	CG10306-PA	1a	gi|19922704	1	1
NQHENQAILK	CG2099-PA	1a	gi|21356927	1	1
NQLQLVAK	CG5599-PA	1a	gi|18859875	0	13
NQYDSDVTVWSPQGR	CG4904-PA	1a	gi|17737405	1	12
NRDEEAELMK	CG3446-PA	1a	gi|18858127	1	11
NSALITTHSWQK	CG13279-PA	1a	gi|17137186	0	9
NSEDIAESLAETNLASNIR	CG1478-PA	1a	gi|17530857	0	33
NSIVVIDATPFR	CG7808-PC	1a	gi|24651181	1	38
NSLQEQNVK	CG9480-PA	1a	gi|45550476	1	39
NSLSTAEYEEK	CG11527-PA	1a	gi|17136984	0	36
NSQLVQDAIANPEKR	CG2791-PA	1a	gi|24644940	1	2
NSQNIVLVDGVR	CG4581-PA	1a	gi|17137578	1	55
NSQTVSPGAITTGNGAPIGIK	CG6871-PA	1a	gi|17981717	1	74
NSYYASIAK	CG12262-PA	1a	gi|24660351	1	112
NTRPSADLEDGASSAVLGVLK	CG7356-PB	1a	gi|24582659	1	19
NTSFELMVHR	CG17374-PA	1a	gi|62862516	0	17
NVANPTAMLLCGVK	CG6439-PA	1a	gi|24648872	1	38
NVDEELPVR	CG10236-PA	1a	gi|17136292	0	274
NVEGQDMLYQSLK	CG12532-PA	1a	gi|17647183	1	19
NVLEADALLGAIDGISQSQVQEAAK	CG4169-PA	1a	gi|24665395	1	151
NVLEILEPVSVQTPK	CG10236-PA	1a	gi|17136292	1	274
NVLTCGGLQSDLLAEK	CG10639-PA	1a	gi|24585081	1	14
NVPTSTLRDPEADDQR	CG7361-PB	1a	gi|24580896	1	18
NVSPEDSDDYYCEILPQR	CG13506-PA	1a	gi|22026914	1	4
NVSSILIR	CG3298-PB	1a	gi|24652403	0	1
NVTQLWADLPAPK	CG15101-PA	1a	gi|20130139	1	2
NVVNEESEEDGGSLAQK	CG7765-PA	1a	gi|17136240	1	4
NYAEVIDALHK	CG5870-PA	1a	gi|17647191	1	77
NYIVHSTDTEADFK	CG3972-PA	1a	gi|17933498	1	601
NYQWALQDCVCR	CG7596-PA	1a	gi|17738017	0	42
NYTNVANALAR	CG1907-PA	1a	gi|21358457	1	11
NYYDFYTYGK	CG6821-PA	1a	gi|17647601	1	120
PAPASSTSVGSGSR	CG10130-PA	1a	gi|21356199	1	6
PDTEIIVTNAGEPSTK	CG4104-PA	1a	gi|19920676	0	24
PFVPVETPK	CG33149-PA	1a	gi|28573630	0	5
PLPTSSFSQQGPTCFDK	CG6878-PA	1a	gi|21357437	0	3
PNDTVVKVQEYK	CG1591-PA	1a	gi|18860055	0	2
PSQEVSVNK	CG3416-PA	1a	gi|24762618	0	1
QAADIIAWVTK	CG6988-PA	1a	gi|17647799	1	73
QAADIQPTLR	CG8888-PA	1a	gi|19922066	0	64
QAANDILVPSAR	CG32092-PB	1a	gi|24662922	0	88
QAAPNTGQQR	CG13397-PA	1a	gi|21356587	0	1
QAATLENGTIEPGTEWER	CG6948-PA	1a	gi|24667294	1	7
QADAAPLLYR	CG9022-PA	1a	gi|24640745	0	15
QADYLNLVQCETLEDLK	CG2934-PA	1a	gi|18543319	1	3
QAECMDPLLR	CG3523-PA	1a	gi|19920632	1	105
QAEIANYWQSLTTK	CG1977-PA	1a	gi|17136504	1	127
QAGQQDFGAPTAK	CG32069-PA	1a	gi|24662435	1	2
QAVAYR	CG3612-PA	1a	gi|24658560	0	476
QAVDDAPSGVLSETER	CG7756-PA	1a	gi|17737941	0	28
QAVIFLR	CG5502-PA	1a	gi|24650747	0	19
QAVTNSANTFYATK	CG8542-PA	1a	gi|24653595	1	38
QCAEGYYGFPECK	CG10236-PA	1a	gi|17136292	0	274
QCGNQLITIDR	CG32702-PA	1a	gi|24640838	0	276
QCNIDDVPAK	CG1167-PA	1a	gi|24657269	0	2
QDEVSQDYNGPR	CG8983-PA	1a	gi|45551086	1	72
QDLGPVAEVETTK	CG9921-PA	1a	gi|18860015	1	8
QDLPNAMTAAELTDK	CG11027-PA	1a	gi|17864182	1	3
QEADNSEDPVFTER	CG3299-PA	1a	gi|17136646	1	99
QEGVFALWK	CG1907-PA	1a	gi|21358457	0	11
QEIAASQEAAR	CG5268-PA	1a	gi|24647293	0	3
QEQISCDVPVTVTEEK	CG4207-PA	1a	gi|19922752	1	3
QEQVEQAILR	CG9688-PA	1a	gi|24651373	0	2
QESELAAQELQAIQK	CG6544-PA	1a	gi|45550732	1	44
QFLGSVDSACVFHNASSR	CG7470-PA	1a	gi|21357643	0	101
QFNDSQQSEGSAPAAK	CG9231-PA	1a	gi|21357525	0	4
QFSGDDISSGDAVAVK	CG5870-PA	1a	gi|17647191	1	77
QFTEAVLQPEGTPGR	CG3299-PA	1a	gi|17136646	1	99
QGALFLMSEK	CG3792-PA	1a	gi|24581793	0	1
QGASVILADLPSSK	CG7113-PA	1a	gi|17737361	1	94
QGLEEAAIPR	CG2254-PA	1a	gi|24640492	0	15
QGNGFIPTTCLK	CG7930-PA	1a	gi|24665772	0	40
QGNGYIPTSCLK	CG9073-PA	1a	gi|17136890	0	33
QGSSGNVQVR	CG9035-PA	1a	gi|19922030	0	18
QGTFHSQQALEYGTK	CG1065-PA	1a	gi|28574296	1	99
QIDLNSVDLK	CG7013-PA	1a	gi|17137698	1	6
QIDVETVADR	CG4254-PA	1a	gi|17136986	1	18
QIGTDVAGPGLGNEYGQEK	CG1448-PA	1a	gi|17864322	1	1
QISSIAIGSAEGFNQAER	CG7507-PA	1a	gi|24658015	1	2
QLAAEGEAAK	CG3621-PA	1a	gi|24639292	0	11
QLDDVEGSVSK	CG10236-PA	1a	gi|17136292	0	274
QLEAISQGVDPQTVAGDFGK	CG5642-PA	1a	gi|21358039	1	1
QLEMLK	CG4207-PA	1a	gi|19922752	0	3
QLGIGVGDTTK	CG5703-PA	1a	gi|18859877	0	37
QLLDLMWAR	CG31132-PA	1a	gi|24649631	0	2
QLLDSTNPQETISVLR	CG4882-PA	1a	gi|17137576	0	2
QLLHVEHPNSDEILER	CG5870-PA	1a	gi|17647191	1	77
QLPFEVPQLPK	CG7603-PA	1a	gi|21355241	1	11
QLQTELDDAR	CG32022-PA	1a	gi|24661095	0	1
QMLGATNPADSLPGTIR	CG2210-PA	1a	gi|45549037	1	30
QMSEYASGSNGFDR	CG16985-PA	1a	gi|21357897	0	5
QMSLLLR	CG3612-PA	1a	gi|24658560	0	476
QMVCDVLHPGLSSVNK	CG3751-PA	1a	gi|20130247	1	1
QNGALVLEVLK	CG31407-PA	1a	gi|24645576	0	1
QNITNCNVLEVLK	CG4666-PA	1a	gi|18858163	0	11
QNLDAFTK	CG5214-PA	1a	gi|24645909	0	48
QNPFVSSSR	CG6846-PA	1a	gi|21357853	0	18
QPDATVQYTTSEDQAALYR	CG3415-PA	1a	gi|18859837	1	76
QPDCPSAR	CG9458-PA	1a	gi|24645542	0	5
QPQAQSLAEELR	CG33484-PD	1a	gi|116007762	0	226
QQETPVVDITGK	CG1977-PA	1a	gi|17136504	1	127
QQPYDAYNLVNFDVPIGTK	CG1970-PA	1a	gi|24638644	1	45
QQVEASR	CG3610-PA	1a	gi|24646928	0	1
QQVLASLPKELK	CG30483-PA	1a	gi|24653538	0	2
QSAEASATPTEGR	CG5599-PA	1a	gi|18859875	1	13
QSDNLNALTITAIK	CG34026-PA	1a	gi|85724812	0	4
QSERELGNIR	CG16757-PA	1a	gi|24656102	0	5
QSGLDVEDPLLK	CG9342-PA	1a	gi|24585552	0	5
QSLGTVVQTSK	CG3322-PA	1a	gi|17737557	1	130
QSLPPGLQVK	CG18001-PA	1a	gi|116007488	1	7
QTGDNVGPIVIK	CG1458-PA	1a	gi|21358227	1	48
QTIDIPGNPQIVR	CG9338-PA	1a	gi|24585535	0	32
QTLGIHGLQPAR	CG5889-PA	1a	gi|21356279	0	9
QTQPEIDISQLK	CG3322-PA	1a	gi|17737557	0	130
QTYTTLVPIEAK	CG11314-PA	1a	gi|24651498	1	15
QVAASTAQLLIACK	CG6831-PA	1a	gi|21355751	0	106
QVDGPTIGTFPK	CG9243-PB	1a	gi|116007352	0	2
QVGASSGSSGAVSK	CG4463-PA	1a	gi|17737553	1	4
QVIDNATEISER	CG3299-PA	1a	gi|17136646	1	99
QVMGVMQHHDAITGTEK	CG9465-PA	1a	gi|24582926	0	1
QVNDILR	CG10157-PA	1a	gi|21355397	0	4
QVNLSASEIENSNGEVVK	CG15293-PA	1a	gi|19921326	1	2
QVVDSAYEVIK	CG10160-PA	1a	gi|17136226	1	1
QVYCDPSYVPEK	CG4422-PA	1a	gi|24583049	1	2
QYDGTQPDGR	CG9066-PA	1a	gi|18859969	1	38
QYNDDLLVEETFDQTK	CG10236-PA	1a	gi|17136292	0	274
QYSELPTNSLLQGK	CG13890-PA	1a	gi|24654903	0	1
QYSINDLPVGR	CG5826-PA	1a	gi|17738015	1	23
QYSSLALINPTIATTGDYK	CG5597-PA	1a	gi|20130319	0	4
QYTYVPNNYNAETAANR	CG4376-PC	1a	gi|17137758	1	241
RAPDSYVTVTK	CG5700-PB	1a	gi|24663043	0	215
REPVQAVQVFGR	CG4046-PA	1a	gi|19922746	1	48
RFNEAQDESK	CG3612-PA	1a	gi|24658560	1	476
RFNEAQDESKK	CG3612-PA	1a	gi|24658560	1	476
RGPIGLAGQSGDPGLNGSR	CG16858-PA	1a	gi|17137252	1	190
RGPLVVYDKDEGLR	CG5502-PA	1a	gi|24650747	1	19
RKPEIVISEDEEYKR	CG10932-PA	1a	gi|24640423	0	18
RLDYDLK	CG3972-PA	1a	gi|17933498	0	601
RLEVVR	CG9244-PB	1a	gi|17864292	0	473
RNRSTGVGDFSFDTHEMIHR	CG33554-PA	1a	gi|161076329	0	1
RPDIYPNPTK	CG3972-PA	1a	gi|17933498	1	601
RPNPIEIISGK	CG1560-PA	1a	gi|24640486	1	17
RPSKPSEVSK	CG6455-PA	1a	gi|45549224	1	49
RPYLGEIVER	CG31195-PA	1a	gi|24648516	1	1
RPYTEGLGLEAVGIVK	CG7430-PA	1a	gi|21358499	1	34
RQDFIDGTAEVK	CG11064-PA	1a	gi|24638795	1	17
RTEDEIIAEDNHIDTNR	CG1309-PA	1a	gi|21355871	1	6
RTGAIVDVPVGDELLGR	CG3612-PA	1a	gi|24658560	1	476
RTPFDLFENQK	CG1242-PA	1a	gi|17647529	1	38
RTTPGNETNPK	CG30423-PB	1a	gi|45551164	0	2
RTVGNPFDLNTEQGPQVNEEQMEK	CG3752-PA	1a	gi|20129399	1	178
RVEADEADDTAK	CG5520-PA	1a	gi|21357739	1	116
RYPSGEER	CG3944-PA	1a	gi|17864306	0	8
SAAAQIIGR	CG32702-PA	1a	gi|24640838	0	276
SAEISNILEER	CG3612-PA	1a	gi|24658560	1	476
SAGVAQLGLGHSYSR	CG13849-PA	1a	gi|28572126	1	2
SANPAAAAPAPAINNSSAGGK	CG14613-PA	1a	gi|19920420	1	9
SAPLAVAAPAPVLR	CG1330-PA	1a	gi|21358141	0	13
SAPSDYAAR	CG13240-PA	1a	gi|19921400	0	25
SAPVLAVELPIYLGGVNK	CG10236-PA	1a	gi|17136292	1	274
SAQNVIFPILVAER	CG3446-PA	1a	gi|18858127	1	11
SASVSDKDVAR	CG4169-PA	1a	gi|24665395	1	151
SATNVEQAFMTMAAEIK	CG3320-PA	1a	gi|24648682	1	16
SCHEETQTQTFTSPGNELVIR	CG32092-PB	1a	gi|24662922	0	88
SCLLLQFTDK	CG3269-PA	1a	gi|17137088	1	17
SCYFGNIADTK	CG9338-PA	1a	gi|24585535	1	32
SDDDMVSDEPIK	CG30373-PA	1a	gi|24586529	1	2
SDEDITEETPADDKVER	CG11888-PA	1a	gi|24650984	1	11
SDGDVVADGFLAK	CG32702-PA	1a	gi|24640838	0	276
SDGYILEGK	CG7808-PC	1a	gi|24651181	1	38
SDLVNNLGTIAK	CG1242-PA	1a	gi|17647529	1	38
SDNIVLDALDAWPK	CG7635-PA	1a	gi|18860517	0	4
SDSGFLLLEEAASR	CG3524-PA	1a	gi|24581345	0	30
SDSSVELQGFR	CG32092-PB	1a	gi|24662922	0	88
SDTFPFVYK	CG5548-PA	1a	gi|24642084	1	31
SDTTSVEQETVK	CG6186-PA	1a	gi|24643010	1	8
SDYVELR	CG32702-PA	1a	gi|24640838	0	276
SEDDVEDEDAKVEEAEDEKPK	CG5520-PA	1a	gi|21357739	1	116
SEEQLKQEGVAYK	CG7430-PA	1a	gi|21358499	1	34
SEGADEVDESDDDEEAPVEKPVSK	CG2050-PA	1a	gi|24651794	1	11
SEGDLTQITPPSALGVQVR	CG11208-PA	1a	gi|19922626	1	2
SELDAYLAK	CG2233-PA	1a	gi|18921139	0	24
SENVELPLLTLDSAACK	CG11314-PA	1a	gi|24651498	1	15
SEQDEYALR	CG4581-PA	1a	gi|17137578	1	55
SEQVVSVNIDSK	CG4104-PA	1a	gi|19920676	1	24
SEVGLELSHVK	CG3322-PA	1a	gi|17737557	1	130
SFCDNCVEQIITEK	CG11064-PA	1a	gi|24638795	1	17
SFGGVTNGPPEK	CG7461-PA	1a	gi|24655582	1	96
SFPGVLAYNISK	CG31548-PA	1a	gi|24644339	1	28
SFVAEVDPVFK	CG6533-PA	1a	gi|17647279	0	14
SFVPTFVDHSK	CG3972-PA	1a	gi|17933498	0	601
SGALLACGIVNCGIR	CG7762-PA	1a	gi|21356859	1	2
SGAVQPLPTTVFAEQEIEK	CG3524-PA	1a	gi|24581345	1	30
SGDNVTVSVENAK	CG7430-PA	1a	gi|21358499	1	34
SGDTVFAGGAAATPVALLNAMAK	CG7920-PA	1a	gi|21358615	1	100
SGELQEWVTATDIR	CG3322-PA	1a	gi|17737557	1	130
SGEYPWPIIK	CG12262-PA	1a	gi|24660351	1	112
SGGKDDDFVDAR	CG32702-PA	1a	gi|24640838	0	276
SGIETVTSTVDSVTSK	CG6455-PA	1a	gi|45549224	1	49
SGPGGSYNYSTER	CG6544-PC	1a	gi|24645757	1	39
SGSPVEYSGGR	CG6988-PA	1a	gi|17647799	1	73
SGVPNLNDHEAIER	CG7654-PA	1a	gi|28574622	1	12
SGVTQTYTNNMPADAR	CG11315-PA	1a	gi|21358239	1	2
SGYLEGSQNILHVDK	CG10236-PA	1a	gi|17136292	1	274
SIEDVSGATPTAAQPTK	CG9206-PA	1a	gi|17647469	1	2
SIEVTLPSPVADFPSI	CG13091-PA	1a	gi|19920962	0	37
SIEYQPGLGAK	CG2076-PA	1a	gi|24641180	1	13
SIGVSNFNSEQLTR	CG10863-PA	1a	gi|21356425	1	1
SILDYQNQAK	CG7359-PA	1a	gi|18921099	0	17
SINDPSMQDLK	CG6831-PA	1a	gi|21355751	1	106
SKEFSTFTPELER	CG11592-PA	1a	gi|19920458	0	27
SLAEQVVNEYR	CG4020-PA	1a	gi|24640000	0	13
SLDLNLLGSAR	CG8888-PA	1a	gi|19922066	1	64
SLEEFKK	CG8905-PA	1a	gi|17136812	0	7
SLEEIYLYSLPIK	CG5920-PA	1a	gi|17136734	1	30
SLELIDCDGIK	CG8194-PA	1a	gi|24660529	0	6
SLFSNANELR	CG32702-PA	1a	gi|24640838	0	276
SLGAEATCLTK	CG14401-PA	1a	gi|45550359	0	2
SLGQYILDK	CG6178-PA	1a	gi|21355181	1	15
SLHYLYEENEK	CG9762-PA	1a	gi|21356475	1	39
SLKDTDTLESLSLR	CG10849-PA	1a	gi|24657023	1	63
SLLDISVPTK	CG9035-PA	1a	gi|19922030	1	18
SLLYVPK	CG5520-PA	1a	gi|21357739	1	116
SLNGEVSTGLVSPAQQLK	CG13255-PA	1a	gi|24667756	0	3
SLSAWQVSELER	CG11527-PA	1a	gi|17136984	1	36
SLSGNTVAALSECASTGR	CG11064-PA	1a	gi|24638795	1	17
SLVEAVAVTK	CG12921-PA	1a	gi|17647695	0	3
SLVEFAGLEGVPSDLK	CG6028-PA	1a	gi|28572127	1	3
SLVHQAVLGVDK	CG3299-PA	1a	gi|17136646	1	99
SLVVANTK	CG3836-PA	1a	gi|24664166	0	2
SMADWDDEEVAEAAAQK	CG5844-PA	1a	gi|21357171	1	4
SMGSSGTGHAGDSTGQDGSYADVDAR	CG11665-PA	1a	gi|24585866	1	2
SNMGAISSPR	CG32702-PA	1a	gi|24640838	0	276
SNMGHAEPASGVSALAK	CG3524-PA	1a	gi|24581345	1	30
SNNLQAFSDR	CG3299-PA	1a	gi|17136646	1	99
SNSFFMGANVR	CG7920-PA	1a	gi|21358615	1	100
SPAYAYVYDNPAEK	CG6917-PA	1a	gi|28574499	1	29
SPDAQGQAYPSAEASKPLDTPQTATEK	CG5479-PA	1a	gi|17647665	1	4
SPDQVDIFK	CG4800-PA	1a	gi|24645861	1	17
SPELNVPGNAGLK	CG1112-PA	1a	gi|17737817	1	17
SPFVPVTEELCR	CG7596-PA	1a	gi|17738017	1	42
SPLYLDGGIR	CG17242-PA	1a	gi|24581083	1	2
SPNPVASEK	CG3624-PA	1a	gi|19922742	0	19
SPQDIDIPAGQTPR	CG32702-PA	1a	gi|24640838	0	276
SPQTPAVQPIFITVDPER	CG8885-PA	1a	gi|19920710	1	1
SPRPESFTIYK	CG3322-PA	1a	gi|17737557	1	130
SPSTALKNVEK	CG7970-PA	1a	gi|21358267	0	5
SPVEDLLNK	CG13383-PB	1a	gi|78742340	0	1
SQDNTQVSTDVRPIGEK	CG7382-PA	1a	gi|19920754	1	6
SQEAGQYPPIESAMR	CG31126-PA	1a	gi|24649743	0	1
SQEGTYEVIATNR	CG1915-PC	1a	gi|161080703	1	363
SQITSIQQEIER	CG3949-PA	1a	gi|17864298	1	12
SQNANWVVVYK	CG2520-PA	1a	gi|24644772	1	11
SQNCDPNIVADFVPADIVAR	CG4020-PA	1a	gi|24640000	0	13
SQQMNLADALEK	CG6094-PA	1a	gi|19921098	1	6
SQSEIPNFVSQDVMER	CG9231-PA	1a	gi|21357525	1	4
SQVFSTASDGQTQVEIK	CG8542-PA	1a	gi|24653595	1	38
SQYGGSYGENAYLK	CG6533-PA	1a	gi|17647279	0	14
SSAGLSDLFR	CG6126-PA	1a	gi|21355657	1	1
SSAPPPPADFFQNDTTSVASK	CG9480-PA	1a	gi|45550476	1	39
SSAYDQLIAAEQQAIK	CG7008-PA	1a	gi|20130403	1	7
SSEFYWTVK	CG4178-PA	1a	gi|17136306	1	13
SSETAAVSNGDAAAEQANDEK	CG30122-PB	1a	gi|22024201	1	1
SSGSVVVSDQKPDEQIKPPR	CG1915-PC	1a	gi|161080703	1	363
SSGTPSTGFTLGSGAGSTGVR	CG10119-PA	1a	gi|24653664	1	59
SSIDEIESNK	CG4598-PA	1a	gi|24583165	0	16
SSLHCIQTIVSK	CG1907-PA	1a	gi|21358457	1	11
SSLNDFDR	CG6253-PA	1a	gi|17647881	1	31
SSLSPLR	CG6544-PA	1a	gi|45550732	0	44
SSNTEAAQDTAEESQSR	CG5268-PA	1a	gi|24647293	1	3
SSPFECGFDPK	CG34076-PA	1a	gi|5835240	0	11
SSQNAALLQYR	CG15537-PB	1a	gi|161079266	0	12
SSQQQEQPQQSQSQNVPAK	CG9159-PA	1a	gi|17737397	1	7
SSSSSFEDLTNAEDTK	CG5482-PA	1a	gi|19922556	1	13
SSTSLSEVQAGNGNVAER	CG11064-PA	1a	gi|24638795	1	17
SSVQEEYGQSTMSSR	CG6120-PA	1a	gi|17738195	1	11
SSYPIYSSYSVPR	CG6544-PA	1a	gi|45550732	0	44
STASEPTEAEVELK	CG32355-PA	1a	gi|45550575	1	2
STCAQCGYPAAK	CG9091-PA	1a	gi|24642107	1	2
STDFAWTVK	CG2559-PA	1a	gi|24641542	1	5
STEQLEAR	CG11527-PA	1a	gi|17136984	0	36
STLQLDQLSSEISR	CG11527-PA	1a	gi|17136984	1	36
STSAEFSYVEDIEER	CG1544-PA	1a	gi|24651589	0	3
STSTEVNECK	CG3322-PA	1a	gi|17737557	0	130
STTSSSSFDYFK	CG33484-PD	1a	gi|116007762	0	226
STVAQIVK	CG3612-PA	1a	gi|24658560	1	476
STYTSTVEK	CG6544-PC	1a	gi|24645757	0	39
SVAWNCAETEELR	CG6831-PA	1a	gi|21355751	0	106
SVDEVLR	CG5826-PA	1a	gi|17738015	1	23
SVDSLLNFETVK	CG4225-PA	1a	gi|21357907	1	13
SVEFGQQSEQISDISR	CG3322-PA	1a	gi|17737557	1	130
SVFEGELNEENLK	CG6988-PA	1a	gi|17647799	1	73
SVFEGELNEENLKK	CG6988-PA	1a	gi|17647799	1	73
SVFTGFR	CG9090-PA	1a	gi|24656137	1	119
SVFVTGGTGFLGK	CG13091-PA	1a	gi|19920962	0	37
SVHGVAATTQNPAIIDCADDVVTSSAR	CG6831-PA	1a	gi|21355751	1	106
SVLANADKEDVASYDR	CG10119-PA	1a	gi|24653664	1	59
SVLCPVLQPK	CG2248-PA	1a	gi|17136856	1	21
SVSSMIQSSAGGARPNDAGAQK	CG6831-PA	1a	gi|21355751	1	106
SVTAVDGNEQLYHQQGDPQQSNEK	CG6944-PA	1a	gi|17136290	1	15
SVTELAGIGETLGGR	CG7380-PA	1a	gi|20129349	1	3
SVTGSMDNTK	CG5700-PB	1a	gi|24663043	0	215
SVYPESASNNEWAR	CG10484-PA	1a	gi|17137450	1	2
SYASGGEDGFVR	CG8882-PA	1a	gi|17648041	1	6
SYDITYVR	CG3322-PA	1a	gi|17737557	0	130
SYGQDSSAASAASSAAAAGAEGQQR	CG6524-PA	1a	gi|17986137	1	14
SYREEEVANEHGAVK	CG3422-PA	1a	gi|17933602	1	6
SYSIQPTTVCTTSASDNSFIK	CG11567-PA	1a	gi|17137192	1	177
TAAAESLPYLLDCAK	CG1059-PA	1a	gi|17737759	1	1
TAANVEEAFINTAK	CG3269-PA	1a	gi|17137088	1	17
TAAPVAVASAPVPVLAK	CG1330-PA	1a	gi|21358141	1	13
TACGSEITASK	CG32702-PA	1a	gi|24640838	0	276
TADGQVFDLHKPEAIK	CG6821-PA	1a	gi|17647601	1	120
TADQLASTDPDYSIR	CG6871-PA	1a	gi|17981717	1	74
TADVNYLSEIR	CG3132-PA	1a	gi|24646169	0	41
TAEPHPKLPGTIYSAAEEIEK	CG5590-PA	1a	gi|21357673	0	55
TAFGTFGGSLK	CG4600-PA	1a	gi|17648125	1	82
TAGFIGADQLGDSLK	CG7998-PA	1a	gi|24647881	1	156
TALAIDTIINQK	CG3612-PA	1a	gi|24658560	1	476
TALARPEELEQR	CG12203-PA	1a	gi|18860539	1	2
TANWVLGNHDQPR	CG30359-PA	1a	gi|24586593	1	2
TAQVETSGGQFDPK	CG11949-PA	1a	gi|24655527	1	43
TASDIVSWASDK	CG5809-PA	1a	gi|19921434	1	15
TASHEEAVGSGDAEEQYIHEK	CG14787-PA	1a	gi|23397616	1	2
TASQETTAAAGSR	CG8782-PA	1a	gi|21357415	1	1
TAWLDNK	CG9916-PA	1a	gi|45549139	1	25
TCEPFENVCGTEIR	CG2813-PA	1a	gi|19920474	0	3
TDALLMDTLQR	CG12846-PA	1a	gi|17648065	1	5
TDDFEDFLR	CG33113-PF	1a	gi|28574660	1	56
TDDFNNGEIQNFPIR	CG10413-PA	1a	gi|19921484	1	2
TDDLNTVLGVAGDDEAAK	CG13850-PA	1a	gi|24648987	1	1
TDLNELMGSPFVR	CG32638-PA	1a	gi|24641679	0	15
TDLPPIR	CG3214-PA	1a	gi|24581165	0	13
TEDAVNQLLK	CG3524-PA	1a	gi|24581345	0	30
TEEAVEEIFNAVEK	CG17374-PA	1a	gi|62862516	1	17
TEIIIMATK	CG6779-PA	1a	gi|17136324	1	63
TELLIDPDIR	CG6750-PA	1a	gi|24583513	0	6
TENLSNNSVAFR	CG1599-PA	1a	gi|19921940	1	2
TEVPSVGVAKPSEPELPK	CG9066-PA	1a	gi|18859969	1	38
TEVPYFNGCLK	CG10236-PA	1a	gi|17136292	1	274
TFELEGK	CG1548-PA	1a	gi|21355083	0	32
TFEPELYEDLEK	CG6812-PA	1a	gi|24666596	1	3
TFGDAIIHK	CG7920-PA	1a	gi|21358615	1	100
TFLIEDQSLK	CG3523-PA	1a	gi|19920632	1	105
TFVEDK	CG3752-PA	1a	gi|20129399	0	178
TFVVDYEKDQFLK	CG3132-PA	1a	gi|24646169	1	41
TFYDAAVVR	CG2968-PA	1a	gi|18858089	1	22
TFYDSVPTEVDEK	CG9480-PA	1a	gi|45550476	1	39
TGAIVDVPVGDELLGR	CG3612-PA	1a	gi|24658560	1	476
TGFIETLR	CG6514-PA	1a	gi|24581885	1	16
TGFNGIVR	CG32702-PA	1a	gi|24640838	1	276
TGLLDLGK	CG11089-PA	1a	gi|24649832	1	1
TGLTPVDSAASTDEQK	CG1100-PA	1a	gi|21357319	1	1
TGNLHLVSGVADPK	CG11949-PA	1a	gi|24655527	1	43
TGQAAGFAYTDANK	CG17903-PA	1a	gi|17137228	1	23
TGSYLTSLDLTYLASPVEK	CG32702-PA	1a	gi|24640838	0	276
TIDNPIVDLYR	CG2918-PA	1a	gi|20128923	1	26
TILEAAR	CG8888-PA	1a	gi|19922066	0	64
TILSDLVDSTGDYVK	CG11064-PA	1a	gi|24638795	1	17
TIPMDGDFFTYTR	CG3752-PA	1a	gi|20129399	1	178
TIQFQPNTTVFDACK	CG6831-PA	1a	gi|21355751	1	106
TITTNPDGTSSVGGSEWQQR	CG11527-PA	1a	gi|17136984	1	36
TKLQQLENKLHDPSEDNK	CG9938-PA	1a	gi|18860017	0	2
TLAAPIVA	CG1259-PB	1a	gi|21355869	0	19
TLANPPVAIHK	CG12954-PA	1a	gi|21687222	1	5
TLAVNSGYDAQDTIVK	CG8231-PA	1a	gi|18859933	1	3
TLCDQATDPADFIK	CG3299-PA	1a	gi|17136646	1	99
TLCSLPTESSDR	CG32702-PA	1a	gi|24640838	0	276
TLDLTSQLVK	CG33303-PA	1a	gi|45552315	1	7
TLEAGTAVGESYR	CG6831-PA	1a	gi|21355751	1	106
TLELLYK	CG9090-PA	1a	gi|24656137	1	119
TLENSIASIR	CG3523-PA	1a	gi|19920632	1	105
TLESVAGHPQIVR	CG9336-PA	1a	gi|24585531	1	6
TLGQTTAQLIQSIK	CG6831-PA	1a	gi|21355751	1	106
TLLVGDPR	CG4046-PA	1a	gi|19922746	1	48
TLLVSPAQELAGK	CG3373-PA	1a	gi|17137194	1	26
TLPEDTLVTPIFK	CG3446-PA	1a	gi|18858127	1	11
TLQGASNPEALTQAGR	CG6831-PA	1a	gi|21355751	1	106
TLSEYSVNAAAK	CG10119-PA	1a	gi|24653664	0	59
TLSVTGIR	CG3624-PA	1a	gi|19922742	0	19
TLSYMYHLNK	CG16904-PA	1a	gi|24645538	0	3
TLTFNDCPEAAK	CG33977-PA	1a	gi|85725222	0	11
TLVQALTPVK	CG30008-PA	1a	gi|24652244	0	19
TLVQALTPVKK	CG30008-PA	1a	gi|24652244	1	19
TNAPLEADLELPK	CG10236-PA	1a	gi|17136292	1	274
TNDPNYISEVGK	CG9092-PA	1a	gi|24582088	0	20
TNLLQVCER	CG3299-PA	1a	gi|17136646	1	99
TNQPCIFLK	CG9258-PA	1a	gi|17137210	1	7
TNYSEIFK	CG5676-PA	1a	gi|24583291	0	5
TPAILAFR	CG2918-PA	1a	gi|20128923	1	26
TPDHQDPPVEPAK	CG7038-PA	1a	gi|17933570	1	3
TPEILDSALK	CG7962-PA	1a	gi|17864222	1	8
TPENMSYHCTR	CG3305-PA	1a	gi|56292537	0	1
TPFDLFENQK	CG1242-PA	1a	gi|17647529	1	38
TPFEDCPVALR	CG30000-PA	1a	gi|21686985	1	12
TPFLTSGTTYSK	CG4581-PA	1a	gi|17137578	1	55
TPGGNYPNGVSCFWK	CG32702-PA	1a	gi|24640838	0	276
TPIGSFQSQLAPLTATQLGAR	CG10932-PA	1a	gi|24640423	1	18
TPLIPVTEQVCQK	CG7587-PA	1a	gi|24647711	0	9
TPNPSVPALVEGK	CG3524-PA	1a	gi|24581345	0	30
TPSAAPSGAASVSVPADR	CG5599-PA	1a	gi|18859875	1	13
TPSQSSAVSETGENALK	CG14181-PA	1a	gi|161082602	1	2
TPSSDVLVFDYTK	CG4236-PA	1a	gi|17933648	1	1
TPVACLQWDQFTPGANK	CG6917-PA	1a	gi|28574499	1	29
TPVLVGEYLNGER	CG5479-PA	1a	gi|17647665	1	4
TPVTNDDEFEAK	CG3322-PA	1a	gi|17737557	1	130
TQEEQLQLCK	CG5889-PA	1a	gi|21356279	1	9
TQPSDDLKK	CG8905-PA	1a	gi|17136812	0	7
TQQQQENPYNEIIAR	CG11488-PA	1a	gi|17647667	1	5
TQTDVASEDTPTSLPEAEK	CG5870-PA	1a	gi|17647191	1	77
TQVSGTYSSGGTFSASAMTSDADR	CG5700-PB	1a	gi|24663043	0	215
TRPPVAAGAVGLAQR	CG12262-PA	1a	gi|24660351	1	112
TSCLGCKSLMPK	CG5949-PA	1a	gi|24664937	0	1
TSEQALLDTIAK	CG3612-PA	1a	gi|24658560	1	476
TSEQDWNLVNDVHLK	CG3415-PA	1a	gi|18859837	1	76
TSFFQALSIPTK	CG7490-PA	1a	gi|17737731	1	43
TSIAELEELNEAGR	CG2023-PA	1a	gi|24644438	1	1
TSLMNQYVNK	CG5915-PA	1a	gi|17865835	0	9
TSSGAYVANR	CG8392-PA	1a	gi|24653999	1	2
TSTISAVGESIAAK	CG8612-PA	1a	gi|21357011	0	2
TSTTGAGPGGYSYSSTTSGNLPGGTK	CG6544-PC	1a	gi|24645757	1	39
TSVNEDGMEK	CG10236-PA	1a	gi|17136292	1	274
TTGEIVSIK	CG6510-PA	1a	gi|17647885	1	10
TTINTNPETLLK	CG5108-PA	1a	gi|17647699	0	3
TTLENGGVTTTGILDQN	CG7461-PA	1a	gi|24655582	1	96
TTPGNETNPK	CG30423-PB	1a	gi|45551164	0	2
TTQQLTDTDAYK	CG3906-PA	1a	gi|19922820	0	1
TTTTSSTTNSALPSR	CG14207-PB	1a	gi|24643312	1	22
TTYVADLASLKPAR	CG6370-PA	1a	gi|19922486	1	19
TVAAPVAPVVAAAPAPVFAK	CG1259-PB	1a	gi|21355869	1	19
TVEEEVPVEEEAKPEK	CG5520-PA	1a	gi|21357739	1	116
TVEELRPEVVSPTSK	CG7111-PA	1a	gi|17137396	1	29
TVEEVGYLLK	CG5177-PA	1a	gi|20129309	1	22
TVEFLVR	CG4169-PA	1a	gi|24665395	1	151
TVEPNTVVEVTK	CG6155-PA	1a	gi|24653432	1	8
TVFITGGTGLLGK	CG10097-PB	1a	gi|78706758	0	80
TVFLTGGTGFLGK	CG17560-PA	1a	gi|24647494	0	24
TVGNPFDLNTEQGPQVNEEQMEK	CG3752-PA	1a	gi|20129399	1	178
TVLAVGPAAAADIDR	CG1307-PB	1a	gi|24644665	1	4
TVLIMELINNVAK	CG11154-PA	1a	gi|24638766	1	585
TVLVQNNNVEEACR	CG32854-PA	1a	gi|24646553	1	6
TVNDALTHFR	CG32092-PB	1a	gi|24662922	0	88
TVNYDGIGWVIR	CG32702-PA	1a	gi|24640838	0	276
TVSMENPTPAGVIDISDDVVK	CG1715-PA	1a	gi|21358165	1	5
TVTFDTLQK	CG6120-PA	1a	gi|17738195	0	11
TVTFNVPQQEMLTK	CG7635-PA	1a	gi|18860517	1	4
TVVISSSDLGQPGVLR	CG34455-PC	1a	gi|45553007	1	3
TVVNQLNAVSTEER	CG4169-PA	1a	gi|24665395	1	151
TVYDPVPSQK	CG9480-PA	1a	gi|45550476	1	39
TVYSSGMPVGR	CG1787-PA	1a	gi|17933586	1	29
TVYSVLEKPDVEK	CG9327-PA	1a	gi|17136420	1	5
TWIDVSGSSAK	CG9539-PA	1a	gi|19920826	1	8
TYAYLTPDLWK	CG5920-PA	1a	gi|17136734	1	30
TYGEDYYEAAMTSVEK	CG8888-PA	1a	gi|19922066	1	64
TYLEQLISR	CG11592-PA	1a	gi|19920458	0	27
TYLPASASGVYYR	CG33303-PA	1a	gi|45552315	1	7
TYNQSSPTQSQQTVVVPVPGEK	CG5700-PB	1a	gi|24663043	1	215
TYPETAQRPEKPEELK	CG4666-PA	1a	gi|18858163	0	11
TYQLAGEGQYGTLLK	CG8947-PA	1a	gi|20428641	1	83
TYSSRPVTTSYAVTTPR	CG6544-PC	1a	gi|24645757	1	39
TYTDELTPLDSACEVHK	CG12079-PA	1a	gi|24656494	1	22
[truncated: 1,113 more rows]

## Sheet: Information-rich Peptides
Peptide sequence	Implied protein(s) (CG identifier)	Peptide evidence class	Implied protein(s) (GI identifier)	Overlap with Brunner et al. (1= seen in both studies / 0= seen only in Foster et al.)	Total Observed Spectra
AAALLGSAAPANADEISK	CG33715-PB,CG33715-PD	2a	gi|161076702,gi|161076705	1	109
AAPGGCCDVVLDR	CG30296-PC,CG30296-PE,CG30296-PG	2a	gi|161077298,gi|161077300,gi|161077304	0	9
AAVEEVPAEYYTSQLGK	CG17691-PA,CG17691-PC	2a	gi|160714828,gi|160714832	1	4
ADDLEDIYK	CG17489-PA,CG17489-PB,CG17489-PC	2a	gi|116007382,gi|116007384,gi|116007388	1	33
ADDLEDIYKK	CG17489-PA,CG17489-PB,CG17489-PC	2a	gi|116007382,gi|116007384,gi|116007388	1	33
ADELLGTASEQFLGK	CG32593-PA,CG32593-PB,CG32593-PC,CG32593-PE,CG32593-PF	2a	gi|24642027,gi|24642031,gi|24642061,gi|24642029,gi|24642033	0	32
ADQSIQLINR	CG9432-PB,CG9432-PD,CG9432-PE	2a	gi|24586058,gi|116007558,gi|116007556	0	102
AEDMSNLTYLNDASVLHNLR	CG17927-PA,CG17927-PB,CG17927-PD,CG17927-PF,CG17927-PH,CG17927-PI,CG17927-PK,CG17927-PL,CG17927-PM	2a	gi|24584704,gi|24584710,gi|24584702,gi|24584700,gi|28574239,gi|24584706,gi|24584712,gi|24584714,gi|24584716	1	2330
AEEEQKMAQRKK	CG7107-PA,CG7107-PB,CG7107-PE,CG7107-PF,CG7107-PG	2a	gi|24641813,gi|24641811,gi|62473677,gi|62473664,gi|62473654	0	236
AEEPLALNEWHTVR	CG33950-PA,CG33950-PC,CG33950-PD,CG33950-PE,CG33950-PF,CG33950-PG	2a	gi|78706472,gi|78706464,gi|78706466,gi|78706468,gi|78706474,gi|161077537	0	871
AETSSQVNLSEVPQK	CG33715-PB,CG33715-PD	2a	gi|161076702,gi|161076705	0	109
AGSEPYVPPPSYWNR	CG6803-PB,CG6803-PD	2a	gi|21357797,gi|24646986	0	71
AGSVGRGASPAPR	CG17927-PA,CG17927-PB,CG17927-PC,CG17927-PD,CG17927-PE,CG17927-PF,CG17927-PG,CG17927-PH,CG17927-PI,CG17927-PJ	2a	gi|24584704,gi|24584710,gi|24584692,gi|24584702,gi|24584696,gi|24584700,gi|24584694,gi|28574239,gi|24584706,gi|24584698	0	2330
AGVDHITNEK	CG17927-PA,CG17927-PC,CG17927-PD,CG17927-PE,CG17927-PF,CG17927-PG,CG17927-PH,CG17927-PI,CG17927-PJ	2a	gi|24584704,gi|24584692,gi|24584702,gi|24584696,gi|24584700,gi|24584694,gi|28574239,gi|24584706,gi|24584698	1	2330
ALQNAESEVAALNR	CG4898-PD,CG4898-PF,CG4898-PG,CG4898-PJ,CG4898-PK,CG4898-PL	2a	gi|24647073,gi|45551898,gi|24647075,gi|24647077,gi|45553377,gi|45553375	1	116
ALSALMTFK	CG5320-PA,CG5320-PF	2a	gi|45549226,gi|45553475	1	156
ALVCEQEAR	CG4898-PB,CG4898-PD,CG4898-PE,CG4898-PF,CG4898-PG,CG4898-PJ,CG4898-PK,CG4898-PL	2a	gi|45551896,gi|24647073,gi|45551900,gi|45551898,gi|24647075,gi|24647077,gi|45553377,gi|45553375	1	116
ANQREEEYKNQIK	CG4898-PB,CG4898-PD,CG4898-PE,CG4898-PF,CG4898-PG,CG4898-PJ,CG4898-PK	2a	gi|45551896,gi|24647073,gi|45551900,gi|45551898,gi|24647075,gi|24647077,gi|45553377	1	116
APLVEEGMTPK	CG30296-PC,CG30296-PD,CG30296-PE,CG30296-PG	2a	gi|161077298,gi|161077296,gi|161077300,gi|161077304	1	9
ASLADEFPR	CG33715-PB,CG33715-PD	2a	gi|161076702,gi|161076705	0	109
ASPENILEALSEK	CG18255-PA,CG18255-PD	2a	gi|24653966,gi|24653978	0	9
ASQQGVAAPATVK	CG17838-PA,CG17838-PB,CG17838-PC,CG17838-PD,CG17838-PE,CG17838-PF,CG17838-PH	2a	gi|45551939,gi|161078444,gi|161078446,gi|24648522,gi|24648520,gi|24648528,gi|161078453	1	3
ASSLEPLDELFER	CG6803-PB,CG6803-PD	2a	gi|21357797,gi|24646986	1	71
ATEIIIK	CG17927-PA,CG17927-PE,CG17927-PG,CG17927-PH,CG17927-PJ	2a	gi|24584704,gi|24584696,gi|24584694,gi|28574239,gi|24584698	0	2330
ATGFEAFLAK	CG11661-PA,CG11661-PB,CG11661-PC,CG11661-PF,CG11661-PG,CG11661-PH,CG11661-PI	2a	gi|24665669,gi|24665673,gi|24665677,gi|28574590,gi|28574592,gi|161084450,gi|161084461	1	218
ATSVRPQFDGLAFPPR	CG17927-PA,CG17927-PB,CG17927-PC,CG17927-PD,CG17927-PE,CG17927-PF,CG17927-PG,CG17927-PH,CG17927-PI,CG17927-PJ	2a	gi|24584704,gi|24584710,gi|24584692,gi|24584702,gi|24584696,gi|24584700,gi|24584694,gi|28574239,gi|24584706,gi|24584698	1	2330
AVESPQNLAELTSDAELLR	CG33715-PB,CG33715-PD	2a	gi|161076702,gi|161076705	0	109
AVLVDLEPGTMDSVR	CG9277-PA,CG9277-PB	2a	gi|24655741,gi|24655737	1	50
AVNDLTDSYGQEWTYR	CG5670-PA,CG5670-PB,CG5670-PC,CG5670-PE,CG5670-PF,CG5670-PG,CG5670-PH	2a	gi|24648576,gi|24648578,gi|24648580,gi|45553441,gi|45553439,gi|45553437,gi|45553435	1	209
AVSSDDKIDTAPASQQMQQLNER	CG33715-PB,CG33715-PD	2a	gi|161076702,gi|161076705	1	109
AYQEAFDIAK	CG17870-PA,CG17870-PB,CG17870-PC,CG17870-PF,CG17870-PG,CG17870-PH,CG17870-PI	2a	gi|24652326,gi|24652328,gi|45551063,gi|45551065,gi|28573324,gi|45552539,gi|62471697	1	5
CACVDVPFGGAK	CG5320-PA,CG5320-PB,CG5320-PF	2a	gi|45549226,gi|24649460,gi|45553475	1	156
CQYNEILNEHSLNFK	CG33950-PA,CG33950-PC,CG33950-PD,CG33950-PE,CG33950-PF,CG33950-PG	2a	gi|78706472,gi|78706464,gi|78706466,gi|78706468,gi|78706474,gi|161077537	1	871
CVDPNTGLIYFK	CG33484-PB,CG33484-PD	2a	gi|116007758,gi|116007762	0	226
CYENVFANTCEECNK	CG32171-PB,CG32171-PC,CG32171-PD,CG32171-PF,CG32171-PG,CG32171-PH	2a	gi|21356031,gi|24665618,gi|24665611,gi|45553167,gi|45553165,gi|45553163	0	62
DADDAVYELNGK	CG10851-PA,CG10851-PB,CG10851-PC,CG10851-PD,CG10851-PE,CG10851-PF	2a	gi|28571689,gi|28571691,gi|28571699,gi|28571693,gi|28571697,gi|28571695	1	3
DAGLGLSSAAMER	CG7107-PF,CG7107-PG	2a	gi|62473664,gi|62473654	0	236
DAGNYEMITGYR	CG5320-PA,CG5320-PF	2a	gi|45549226,gi|45553475	1	156
DAGVLGLSSAAMER	CG7107-PA,CG7107-PB,CG7107-PD,CG7107-PE	2a	gi|24641813,gi|24641811,gi|24641815,gi|62473677	1	17
DCAIEGTQCTPGVCGAGR	CG33950-PA,CG33950-PC,CG33950-PD,CG33950-PE,CG33950-PF,CG33950-PG	2a	gi|78706472,gi|78706464,gi|78706466,gi|78706468,gi|78706474,gi|161077537	0	871
DENTAILEVDR	CG33950-PA,CG33950-PC,CG33950-PD,CG33950-PE,CG33950-PF,CG33950-PG	2a	gi|78706472,gi|78706464,gi|78706466,gi|78706468,gi|78706474,gi|161077537	0	871
DFNEWFGDAK	CG33715-PB,CG33715-PD	2a	gi|161076702,gi|161076705	0	109
DGQATPWGIR	CG6416-PB,CG6416-PF	2a	gi|45550577,gi|28574408	0	33
DHQQDVDEEQAAIVNQPYR	CG6416-PB,CG6416-PE,CG6416-PF	2a	gi|45550577,gi|28574406,gi|28574408	1	33
DLEEIEQVFR	CG33715-PB,CG33715-PD	2a	gi|161076702,gi|161076705	1	109
DLLQQVNPPK	CG17927-PA,CG17927-PB,CG17927-PD,CG17927-PF,CG17927-PH,CG17927-PI,CG17927-PK,CG17927-PL,CG17927-PM	2a	gi|24584704,gi|24584710,gi|24584702,gi|24584700,gi|28574239,gi|24584706,gi|24584712,gi|24584714,gi|24584716	1	2330
DLLSPSPNLPISSIVR	CG6803-PB,CG6803-PD	2a	gi|21357797,gi|24646986	1	71
DLNPDVNAFQR	CG1709-PA,CG1709-PB,CG1709-PC,CG1709-PD,CG1709-PE,CG1709-PF,CG1709-PG	2a	gi|24650959,gi|24650965,gi|24650956,gi|24650967,gi|21358171,gi|24650961,gi|24650963	1	17
DLSHADAQQLFR	CG6416-PB,CG6416-PE,CG6416-PF	2a	gi|45550577,gi|28574406,gi|28574408	0	33
DMQALQDSFDQIK	CG33715-PB,CG33715-PD	2a	gi|161076702,gi|161076705	0	109
DPLDVSFNDPIAAFK	CG1417-PA,CG1417-PB,CG1417-PD,CG1417-PE,CG1417-PF,CG1417-PG,CG1417-PH	2a	gi|24643717,gi|24643721,gi|24643719,gi|24643715,gi|45556180,gi|45556169,gi|45556158	1	6
DPSGDVIEDLEGER	CG9432-PB,CG9432-PD,CG9432-PE	2a	gi|24586058,gi|116007558,gi|116007556	1	102
DQFAALVR	CG32593-PA,CG32593-PB,CG32593-PC,CG32593-PE,CG32593-PF	2a	gi|24642027,gi|24642031,gi|24642061,gi|24642029,gi|24642033	0	32
DTLYEGVNGLLEASAK	CG7283-PA,CG7283-PB	2a	gi|24662946,gi|24662950	1	26
EAQQLGER	CG32031-PA,CG32031-PB	2a	gi|24661336,gi|24661340	1	143
EEEYKNQIK	CG4898-PB,CG4898-PD,CG4898-PE,CG4898-PF,CG4898-PG,CG4898-PJ,CG4898-PK	2a	gi|45551896,gi|24647073,gi|45551900,gi|45551898,gi|24647075,gi|24647077,gi|45553377	0	116
EETKPPQTPAEGEGDPEFIK	CG7107-PA,CG7107-PG	2a	gi|24641813,gi|62473654	1	17
EGITDCRPCAQGPCQNK	CG33950-PA,CG33950-PC,CG33950-PD,CG33950-PE,CG33950-PF,CG33950-PG	2a	gi|78706472,gi|78706464,gi|78706466,gi|78706468,gi|78706474,gi|161077537	0	871
EIDIGIPDATGR	CG2331-PA,CG2331-PC,CG2331-PD	2a	gi|17137560,gi|161076486,gi|161076488	1	19
EKNEYYGQLNDLR	CG17927-PA,CG17927-PC,CG17927-PD,CG17927-PE,CG17927-PF,CG17927-PG,CG17927-PH,CG17927-PI,CG17927-PJ	2a	gi|24584704,gi|24584692,gi|24584702,gi|24584696,gi|24584700,gi|24584694,gi|28574239,gi|24584706,gi|24584698	1	2330
EKREEQER	CG33715-PB,CG33715-PD	2a	gi|161076702,gi|161076705	0	109
ELADEIEEVNER	CG9432-PB,CG9432-PD,CG9432-PE	2a	gi|24586058,gi|116007558,gi|116007556	0	102
ELGVGLVTR	CG6783-PB,CG6783-PC	2a	gi|78706754,gi|78706752	1	10
ELQELVQYPVEHPDK	CG2331-PA,CG2331-PC,CG2331-PD	2a	gi|17137560,gi|161076486,gi|161076488	1	19
ELQLEQQALNR	CG33715-PB,CG33715-PD	2a	gi|161076702,gi|161076705	0	109
EMIASGQQSQAAFQAQK	CG33715-PB,CG33715-PD	2a	gi|161076702,gi|161076705	0	109
ENMLSR	CG18255-PA,CG18255-PC,CG18255-PF	2a	gi|24653966,gi|24653968,gi|24653970	0	9
EQPDLNECIQYQPYR	CG6416-PA,CG6416-PG,CG6416-PH,CG6416-PI,CG6416-PJ	2a	gi|24661058,gi|28574410,gi|28574412,gi|28574416,gi|45552078	0	15
ETVVEVPNTTWTDIGGLESVK	CG2331-PA,CG2331-PC,CG2331-PD	2a	gi|17137560,gi|161076486,gi|161076488	1	19
EVDRLEDDLVLEK	CG4898-PB,CG4898-PD,CG4898-PE,CG4898-PG,CG4898-PJ	2a	gi|45551896,gi|24647073,gi|45551900,gi|24647075,gi|24647077	1	116
EVPVSSPLSPVEQK	CG18408-PA,CG18408-PB,CG18408-PC,CG18408-PF,CG18408-PG,CG18408-PH,CG18408-PI,CG18408-PJ	2a	gi|24652386,gi|45551068,gi|24652388,gi|24652390,gi|24652392,gi|20301946,gi|24652384,gi|45552545	1	3
EWYGENIQSSPDLSR	CG11140-PA,CG11140-PB,CG11140-PC,CG11140-PD,CG11140-PE,CG11140-PF,CG11140-PG,CG11140-PI	2a	gi|24586252,gi|24586254,gi|24586256,gi|24586258,gi|45552499,gi|45551030,gi|45551031,gi|24586250	1	23
EYSEHELEK	CG5320-PA,CG5320-PB,CG5320-PF	2a	gi|45549226,gi|24649460,gi|45553475	1	156
FDAQPWGFR	CG30084-PA,CG30084-PC,CG30084-PE,CG30084-PF,CG30084-PG	2a	gi|78707559,gi|78709100,gi|78707228,gi|161077121,gi|116007706	1	100
FDLAPENEF	CG17927-PA,CG17927-PB,CG17927-PC,CG17927-PD,CG17927-PE,CG17927-PF,CG17927-PG,CG17927-PH,CG17927-PI,CG17927-PJ	2a	gi|24584704,gi|24584710,gi|24584692,gi|24584702,gi|24584696,gi|24584700,gi|24584694,gi|28574239,gi|24584706,gi|24584698	0	2330
FETPGVLNFSPEEK	CG11661-PA,CG11661-PB,CG11661-PC,CG11661-PF,CG11661-PG,CG11661-PH,CG11661-PI	2a	gi|24665669,gi|24665673,gi|24665677,gi|28574590,gi|28574592,gi|161084450,gi|161084461	1	218
FIDLPEDQYR	CG17927-PA,CG17927-PE,CG17927-PG,CG17927-PH,CG17927-PJ	2a	gi|24584704,gi|24584696,gi|24584694,gi|28574239,gi|24584698	0	2330
FLAEEADKK	CG4898-PB,CG4898-PC,CG4898-PD,CG4898-PE,CG4898-PF,CG4898-PG,CG4898-PH,CG4898-PI,CG4898-PJ,CG4898-PK	2a	gi|45551896,gi|24647085,gi|24647073,gi|45551900,gi|45551898,gi|24647075,gi|45551902,gi|45551904,gi|24647077,gi|45553377	0	116
FLAEEADKKYDEVAR	CG4898-PB,CG4898-PD,CG4898-PE,CG4898-PF,CG4898-PG,CG4898-PJ,CG4898-PK	2a	gi|45551896,gi|24647073,gi|45551900,gi|45551898,gi|24647075,gi|24647077,gi|45553377	1	116
FLDANGEVADSEPVEETEEEEEAPK	CG6988-PA,CG6988-PD	2a	gi|17647799,gi|24664525	1	73
FLDANGEVADSEPVEETEEEEEAPKK	CG6988-PA,CG6988-PD	2a	gi|17647799,gi|24664525	1	73
FSLDVSR	CG5320-PA,CG5320-PF	2a	gi|45549226,gi|45553475	0	156
FSLDVSRDEVK	CG5320-PA,CG5320-PF	2a	gi|45549226,gi|45553475	1	156
FTLELAK	CG5320-PA,CG5320-PB,CG5320-PF	2a	gi|45549226,gi|24649460,gi|45553475	1	156
GAESVLDQR	CG33715-PB,CG33715-PD	2a	gi|161076702,gi|161076705	0	109
GAVDGGLNIPHSVK	CG17489-PA,CG17489-PB,CG17489-PC	2a	gi|116007382,gi|116007384,gi|116007388	1	33
GCQIAEESLVDDMK	CG5320-PA,CG5320-PF	2a	gi|45549226,gi|45553475	1	156
GCQIAEESLVDDMKGK	CG5320-PA,CG5320-PF	2a	gi|45549226,gi|45553475	1	156
GDIVSVGLQGGETR	CG17927-PA,CG17927-PB,CG17927-PD,CG17927-PF,CG17927-PH,CG17927-PI,CG17927-PK,CG17927-PL,CG17927-PM	2a	gi|24584704,gi|24584710,gi|24584702,gi|24584700,gi|28574239,gi|24584706,gi|24584712,gi|24584714,gi|24584716	1	2330
GDIVSVGLQGGEVR	CG17927-PC,CG17927-PE,CG17927-PG,CG17927-PJ	2a	gi|24584692,gi|24584696,gi|24584694,gi|24584698	0	3
GELDNSGNEIDNIK	CG33715-PB,CG33715-PD	2a	gi|161076702,gi|161076705	0	109
GETNAFIQSIK	CG32031-PA,CG32031-PB	2a	gi|24661336,gi|24661340	0	143
GFIGPGVDVPAPDMGTGER	CG5320-PA,CG5320-PB,CG5320-PF	2a	gi|45549226,gi|24649460,gi|45553475	1	156
GGHAELLINTAAR	CG33950-PA,CG33950-PC,CG33950-PD,CG33950-PE,CG33950-PF,CG33950-PG	2a	gi|78706472,gi|78706464,gi|78706466,gi|78706468,gi|78706474,gi|161077537	1	871
GGPSVFDR	CG6803-PB,CG6803-PD	2a	gi|21357797,gi|24646986	0	71
GIPTIYEGNLEDEEK	CG9432-PB,CG9432-PD	2a	gi|24586058,gi|116007558	1	102
GLQDATAQQQQR	CG8428-PA,CG8428-PC	2a	gi|24654039,gi|24654037	1	2
GNSFAAYGTPK	CG33950-PA,CG33950-PC,CG33950-PD,CG33950-PE,CG33950-PF,CG33950-PG	2a	gi|78706472,gi|78706464,gi|78706466,gi|78706468,gi|78706474,gi|161077537	1	871
GSGDYIALSLK	CG33950-PA,CG33950-PC,CG33950-PD,CG33950-PE,CG33950-PF,CG33950-PG	2a	gi|78706472,gi|78706464,gi|78706466,gi|78706468,gi|78706474,gi|161077537	0	871
GTATTPAAGSAAGDAR	CG1725-PA,CG1725-PB,CG1725-PD,CG1725-PE,CG1725-PF,CG1725-PG,CG1725-PH,CG1725-PK,CG1725-PL	2a	gi|24641280,gi|45554813,gi|24641282,gi|45554818,gi|24641278,gi|45554804,gi|45554791,gi|161077752,gi|161077754	1	10
GTQAVWSEFVDQK	CG33715-PB,CG33715-PD	2a	gi|161076702,gi|161076705	0	109
GTVDRSTTVVSK	CG18069-PB,CG18069-PD,CG18069-PE,CG18069-PG	2a	gi|24638772,gi|62484414,gi|62484416,gi|62473187	0	1
GVAEDFAPSFVK	CG32019-PA,CG32019-PC,CG32019-PD	2a	gi|28558739,gi|45552151,gi|45552153	0	787
HQLDKPEGPAAEELSK	CG33715-PB,CG33715-PD	2a	gi|161076702,gi|161076705	1	109
IAVNVQQVSSR	CG33715-PB,CG33715-PD	2a	gi|161076702,gi|161076705	0	109
IAYTQGATQEAGPGSR	CG6416-PB,CG6416-PE,CG6416-PF	2a	gi|45550577,gi|28574406,gi|28574408	1	33
IDDLINDLR	CG33715-PB,CG33715-PD	2a	gi|161076702,gi|161076705	1	109
IDNPEEAVEYGINK	CG9432-PB,CG9432-PD	2a	gi|24586058,gi|116007558	1	102
IDVPVNYSTPVSK	CG31794-PA,CG31794-PB,CG31794-PC,CG31794-PF,CG31794-PG	2a	gi|24585205,gi|24585203,gi|24585199,gi|85816101,gi|85724960	1	5
IEDPLQFVPAGTNPR	CG9325-PA,CG9325-PB,CG9325-PD,CG9325-PE,CG9325-PF	2a	gi|17136738,gi|24655667,gi|24655685,gi|24655672,gi|24655677	1	30
IEGSTNIQNIAK	CG40049-PA,CG40049-PB,CG40049-PC	2a	gi|116007910,gi|116007912,gi|116007908	1	1
IFVGGLTTEISDEEIK	CG16901-PA,CG16901-PB,CG16901-PC	2a	gi|24646609,gi|24646607,gi|24646605	1	2
IINDESVQESLER	CG5320-PA,CG5320-PB	2a	gi|45549226,gi|24649460	1	156
IIVLPICPGLQGPEYK	CG30084-PE,CG30084-PG	2a	gi|78707228,gi|116007706	0	1
ILAELENIDDECDQNDIAFVK	CG9432-PA,CG9432-PB,CG9432-PD	2a	gi|24586060,gi|24586058,gi|116007558	1	102
ILNELENIDDECEEK	CG9432-PA,CG9432-PB,CG9432-PD	2a	gi|24586060,gi|24586058,gi|116007558	1	102
ILNELENIDDELEK	CG9432-PA,CG9432-PB,CG9432-PD	2a	gi|24586060,gi|24586058,gi|116007558	0	102
ILQGELPEGAQK	CG33715-PB,CG33715-PD	2a	gi|161076702,gi|161076705	0	109
INDDLISEYPDK	CG1725-PA,CG1725-PB,CG1725-PD,CG1725-PE,CG1725-PG,CG1725-PH,CG1725-PK,CG1725-PL	2a	gi|24641280,gi|45554813,gi|24641282,gi|45554818,gi|45554804,gi|45554791,gi|161077752,gi|161077754	0	10
INDVDVFNLR	CG30084-PA,CG30084-PC,CG30084-PE,CG30084-PF,CG30084-PG	2a	gi|78707559,gi|78709100,gi|78707228,gi|161077121,gi|116007706	1	100
INEIQDALPEGVAK	CG33715-PB,CG33715-PD	2a	gi|161076702,gi|161076705	0	109
INVYYNEASGGK	CG9277-PA,CG9277-PB	2a	gi|24655741,gi|24655737	1	50
IPLCNSCNVQIR	CG30084-PC,CG30084-PE,CG30084-PF,CG30084-PG,CG30084-PH	2a	gi|78709100,gi|78707228,gi|161077121,gi|116007706,gi|161077123	1	100
IQECEGVLASANDK	CG33715-PB,CG33715-PD	2a	gi|161076702,gi|161076705	1	109
IQTVENELDQTQEALTLVTGK	CG4898-PB,CG4898-PD,CG4898-PE,CG4898-PF,CG4898-PG,CG4898-PJ,CG4898-PK,CG4898-PL	2a	gi|45551896,gi|24647073,gi|45551900,gi|45551898,gi|24647075,gi|24647077,gi|45553377,gi|45553375	1	116
ISEETIEEPK	CG18255-PA,CG18255-PD	2a	gi|24653966,gi|24653978	0	9
ISSFPTIK	CG6988-PA,CG6988-PD	2a	gi|17647799,gi|24664525	0	73
IVELEEELR	CG4898-PA,CG4898-PB,CG4898-PD,CG4898-PE,CG4898-PF,CG4898-PG,CG4898-PJ,CG4898-PK,CG4898-PL	2a	gi|24647089,gi|45551896,gi|24647073,gi|45551900,gi|45551898,gi|24647075,gi|24647077,gi|45553377,gi|45553375	1	116
IVLTTPVCTEK	CG6476-PB,CG6476-PC	2a	gi|24647046,gi|24647048	1	3
IYCGNCYDAQFASR	CG32171-PB,CG32171-PC,CG32171-PD,CG32171-PF,CG32171-PG,CG32171-PH	2a	gi|21356031,gi|24665618,gi|24665611,gi|45553167,gi|45553165,gi|45553163	1	62
KAEDLYNAIPQQPR	CG33715-PB,CG33715-PD	2a	gi|161076702,gi|161076705	0	109
KDAGLGLSSAAMER	CG7107-PF,CG7107-PG	2a	gi|62473664,gi|62473654	0	236
KDAGVLGLSSAAMER	CG7107-PA,CG7107-PB,CG7107-PD,CG7107-PE	2a	gi|24641813,gi|24641811,gi|24641815,gi|62473677	1	17
KDLLQQVNPPK	CG17927-PA,CG17927-PB,CG17927-PD,CG17927-PF,CG17927-PH,CG17927-PI,CG17927-PK,CG17927-PL,CG17927-PM	2a	gi|24584704,gi|24584710,gi|24584702,gi|24584700,gi|28574239,gi|24584706,gi|24584712,gi|24584714,gi|24584716	1	2330
KFEEFDEEDDDDRREPLEK	CG31764-PA,CG31764-PB,CG31764-PC	2a	gi|24583894,gi|24583896,gi|45552331	0	2
KGFIGPGVDVPAPDMGTGER	CG5320-PA,CG5320-PB,CG5320-PF	2a	gi|45549226,gi|24649460,gi|45553475	1	156
KIQTVENELDQTQEALTLVTGK	CG4898-PB,CG4898-PD,CG4898-PE,CG4898-PF,CG4898-PG,CG4898-PJ,CG4898-PK,CG4898-PL	2a	gi|45551896,gi|24647073,gi|45551900,gi|45551898,gi|24647075,gi|24647077,gi|45553377,gi|45553375	1	116
KLAMVEADLER	CG4898-PB,CG4898-PD,CG4898-PE,CG4898-PF,CG4898-PG,CG4898-PJ,CG4898-PK	2a	gi|45551896,gi|24647073,gi|45551900,gi|45551898,gi|24647075,gi|24647077,gi|45553377	1	116
KPPQTPAEGEGDPEFIK	CG7107-PA,CG7107-PF,CG7107-PG	2a	gi|24641813,gi|62473664,gi|62473654	0	236
KPPQTPAEGEGDPEFIKR	CG7107-PA,CG7107-PF,CG7107-PG	2a	gi|24641813,gi|62473664,gi|62473654	0	236
KPQLHQEDDGNR	CG32019-PA,CG32019-PC,CG32019-PD	2a	gi|28558739,gi|45552151,gi|45552153	0	787
KQDTMVDAAVLAK	CG32031-PA,CG32031-PB,CG32031-PC,CG32031-PE	2a	gi|24661336,gi|24661340,gi|24661344,gi|161082598	1	143
KVTLLFNEVDRAAQR	CG33275-PA,CG33275-PB	2a	gi|161082060,gi|161082065	0	1
KYDEVAR	CG4898-PB,CG4898-PD,CG4898-PE,CG4898-PF,CG4898-PG,CG4898-PJ,CG4898-PK	2a	gi|45551896,gi|24647073,gi|45551900,gi|45551898,gi|24647075,gi|24647077,gi|45553377	0	116
LAELQEWANK	CG33715-PB,CG33715-PD	2a	gi|161076702,gi|161076705	0	109
LAMVEADLER	CG4898-PB,CG4898-PD,CG4898-PE,CG4898-PF,CG4898-PG,CG4898-PJ,CG4898-PK	2a	gi|45551896,gi|24647073,gi|45551900,gi|45551898,gi|24647075,gi|24647077,gi|45553377	1	116
LAQLEEIFK	CG33715-PB,CG33715-PD	2a	gi|161076702,gi|161076705	1	109
LDDQSSNLR	CG33950-PA,CG33950-PC,CG33950-PD,CG33950-PE,CG33950-PF,CG33950-PG	2a	gi|78706472,gi|78706464,gi|78706466,gi|78706468,gi|78706474,gi|161077537	0	871
LDEGPATEVK	CG7010-PA,CG7010-PC,CG7010-PD	2a	gi|28571106,gi|24639740,gi|24639744	1	33
LDENAFYQSLK	CG33715-PB,CG33715-PD	2a	gi|161076702,gi|161076705	0	109
LDGEEAVIR	CG33950-PA,CG33950-PC,CG33950-PD,CG33950-PE,CG33950-PF,CG33950-PG	2a	gi|78706472,gi|78706464,gi|78706466,gi|78706468,gi|78706474,gi|161077537	1	871
LDPVVVR	CG33950-PA,CG33950-PC,CG33950-PD,CG33950-PE,CG33950-PF,CG33950-PG	2a	gi|78706472,gi|78706464,gi|78706466,gi|78706468,gi|78706474,gi|161077537	0	871
LEDDLVLEK	CG4898-PB,CG4898-PD,CG4898-PE,CG4898-PG,CG4898-PJ	2a	gi|45551896,gi|24647073,gi|45551900,gi|24647075,gi|24647077	0	116
LEIPNIR	CG33950-PD,CG33950-PF,CG33950-PG	2a	gi|78706466,gi|78706474,gi|161077537	0	871
LETAFDVAESK	CG33715-PB,CG33715-PD	2a	gi|161076702,gi|161076705	0	109
LEVEDQPHELK	CG33950-PA,CG33950-PC,CG33950-PD,CG33950-PE,CG33950-PF,CG33950-PG	2a	gi|78706472,gi|78706464,gi|78706466,gi|78706468,gi|78706474,gi|161077537	1	871
LFEVVDEHK	CG10944-PB,CG10944-PC	2a	gi|17737290,gi|24640435	1	25
LFSAIGEPIPQEVPQEVTAAK	CG33715-PB,CG33715-PD	2a	gi|161076702,gi|161076705	1	109
LGEGILR	CG33950-PA,CG33950-PC,CG33950-PD,CG33950-PE,CG33950-PF,CG33950-PG	2a	gi|78706472,gi|78706464,gi|78706466,gi|78706468,gi|78706474,gi|161077537	0	871
LGPWIAQR	CG2098-PA,CG2098-PC	2a	gi|17864156,gi|24651774	0	14
LIEDQLAHLR	CG33715-PB,CG33715-PD	2a	gi|161076702,gi|161076705	0	109
LISGGAAAADGR	CG1725-PA,CG1725-PB,CG1725-PD,CG1725-PE,CG1725-PF,CG1725-PG,CG1725-PH,CG1725-PK,CG1725-PL	2a	gi|24641280,gi|45554813,gi|24641282,gi|45554818,gi|24641278,gi|45554804,gi|45554791,gi|161077752,gi|161077754	1	10
LITGVFVR	CG30084-PA,CG30084-PC,CG30084-PF	2a	gi|78707559,gi|78709100,gi|161077121	1	100
LIVEEAQNDDNSVVSLSQAK	CG2331-PA,CG2331-PC	2a	gi|17137560,gi|161076486	1	19
LIVENLSSR	CG10851-PA,CG10851-PB,CG10851-PC,CG10851-PD,CG10851-PE,CG10851-PF	2a	gi|28571689,gi|28571691,gi|28571699,gi|28571693,gi|28571697,gi|28571695	1	3
LKEEAAATTAAAAAATTTSA	CG4863-PA,CG4863-PB,CG4863-PE	2a	gi|17737907,gi|24645877,gi|24645879	1	24
LLGPGLNK	CG7283-PA,CG7283-PC	2a	gi|24662946,gi|24662954	1	26
LLQGVEK	CG17927-PA,CG17927-PE,CG17927-PG,CG17927-PH,CG17927-PJ	2a	gi|24584704,gi|24584696,gi|24584694,gi|28574239,gi|24584698	0	2330
LMDGGAAQVDGR	CG1725-PA,CG1725-PB,CG1725-PD,CG1725-PE,CG1725-PF,CG1725-PG,CG1725-PH,CG1725-PK,CG1725-PL	2a	gi|24641280,gi|45554813,gi|24641282,gi|45554818,gi|24641278,gi|45554804,gi|45554791,gi|161077752,gi|161077754	1	10
LNVSYPATGCQK	CG10944-PB,CG10944-PC	2a	gi|17737290,gi|24640435	1	25
LPPGNELVIPVQHER	CG33484-PB,CG33484-PD	2a	gi|116007758,gi|116007762	0	226
LPSTTFIGGDEASLPLK	CG11661-PA,CG11661-PB,CG11661-PC,CG11661-PF,CG11661-PG,CG11661-PH,CG11661-PI	2a	gi|24665669,gi|24665673,gi|24665677,gi|28574590,gi|28574592,gi|161084450,gi|161084461	1	218
LQGGTDFAQPLLVQK	CG30084-PA,CG30084-PC,CG30084-PE,CG30084-PF,CG30084-PG	2a	gi|78707559,gi|78709100,gi|78707228,gi|161077121,gi|116007706	1	100
LVGGNDLDTPLIITR	CG6416-PB,CG6416-PF	2a	gi|45550577,gi|28574408	1	33
LVISNVSPSDAGNYVCK	CG33950-PA,CG33950-PC,CG33950-PD,CG33950-PE,CG33950-PF,CG33950-PG	2a	gi|78706472,gi|78706464,gi|78706466,gi|78706468,gi|78706474,gi|161077537	1	871
LVLMEQDLER	CG4898-PA,CG4898-PL	2a	gi|24647089,gi|45553375	1	1
MDALENQLK	CG4898-PB,CG4898-PC,CG4898-PD,CG4898-PE,CG4898-PF,CG4898-PG,CG4898-PH,CG4898-PI,CG4898-PJ,CG4898-PK	2a	gi|45551896,gi|24647085,gi|24647073,gi|45551900,gi|45551898,gi|24647075,gi|45551902,gi|45551904,gi|24647077,gi|45553377	1	116
MDSTANELESIK	CG6988-PA,CG6988-PD	2a	gi|17647799,gi|24664525	1	73
MGSPGSSSATAQQLQTVK	CG33715-PB,CG33715-PD	2a	gi|161076702,gi|161076705	0	109
MLDPDDLINTPKPDER	CG4376-PB,CG4376-PC	2a	gi|24639240,gi|17137758	1	241
MLHSGETRPTSK	CG33950-PA,CG33950-PC,CG33950-PD,CG33950-PE,CG33950-PF,CG33950-PG	2a	gi|78706472,gi|78706464,gi|78706466,gi|78706468,gi|78706474,gi|161077537	0	871
NEDVDSILQR	CG33715-PB,CG33715-PD	2a	gi|161076702,gi|161076705	0	109
NEYYGQLNDLR	CG17927-PA,CG17927-PC,CG17927-PD,CG17927-PE,CG17927-PF,CG17927-PG,CG17927-PH,CG17927-PI,CG17927-PJ	2a	gi|24584704,gi|24584692,gi|24584702,gi|24584696,gi|24584700,gi|24584694,gi|28574239,gi|24584706,gi|24584698	1	2330
NNASTEYDLTDK	CG4863-PA,CG4863-PB,CG4863-PE	2a	gi|17737907,gi|24645877,gi|24645879	1	24
NPSPAGSPQR	CG1417-PA,CG1417-PB,CG1417-PD,CG1417-PE,CG1417-PF,CG1417-PG,CG1417-PH	2a	gi|24643717,gi|24643721,gi|24643719,gi|24643715,gi|45556180,gi|45556169,gi|45556158	0	6
NQVTQVEEINPER	CG33715-PB,CG33715-PD	2a	gi|161076702,gi|161076705	1	109
NVLCNFHGMDLTTDK	CG2168-PA,CG2168-PB	2a	gi|17864162,gi|24638499	1	33
NYDSLQNEIADR	CG33715-PB,CG33715-PD	2a	gi|161076702,gi|161076705	1	109
QAAINNPPTGTEGYVPVPIKPNTK	CG30084-PA,CG30084-PC,CG30084-PE,CG30084-PF,CG30084-PG	2a	gi|78707559,gi|78709100,gi|78707228,gi|161077121,gi|116007706	1	100
QGGGGIRK	CG6143-PB,CG6143-PC	2a	gi|17864514,gi|45553181	0	3
QIDGFAPTFAK	CG32019-PA,CG32019-PC,CG32019-PD	2a	gi|28558739,gi|45552151,gi|45552153	0	787
QLDLLAADASELAPK	CG33715-PB,CG33715-PD	2a	gi|161076702,gi|161076705	0	109
QQQPGDISLDQAYDNAK	CG33715-PB,CG33715-PD	2a	gi|161076702,gi|161076705	1	109
QSLADVLEK	CG33715-PB,CG33715-PD	2a	gi|161076702,gi|161076705	0	109
QVDTEINGEDFTK	CG16901-PA,CG16901-PB,CG16901-PC	2a	gi|24646609,gi|24646607,gi|24646605	1	2
QYGQLQAGR	CG33950-PA,CG33950-PC,CG33950-PD,CG33950-PE,CG33950-PF,CG33950-PG	2a	gi|78706472,gi|78706464,gi|78706466,gi|78706468,gi|78706474,gi|161077537	1	871
RDENTAILEVDR	CG33950-PA,CG33950-PC,CG33950-PD,CG33950-PE,CG33950-PF,CG33950-PG	2a	gi|78706472,gi|78706464,gi|78706466,gi|78706468,gi|78706474,gi|161077537	0	871
RFPGYSAETK	CG17489-PA,CG17489-PB,CG17489-PC	2a	gi|116007382,gi|116007384,gi|116007388	1	33
RIMGPSTAIGGR	CG18255-PA,CG18255-PC,CG18255-PF	2a	gi|24653966,gi|24653968,gi|24653970	0	9
SAAPPADSAAAPAAAPAVEK	CG4609-PA,CG4609-PC	2a	gi|28574889,gi|62472216	1	9
SENFDEYMK	CG6783-PB,CG6783-PC	2a	gi|78706754,gi|78706752	1	10
SIEASVGSAYENVK	CG5174-PA,CG5174-PB,CG5174-PG,CG5174-PH,CG5174-PI,CG5174-PJ	2a	gi|24655026,gi|24655036,gi|24655020,gi|24655029,gi|24655022,gi|24655017	1	15
SKEEDELKK	CG7107-PA,CG7107-PB,CG7107-PE,CG7107-PF,CG7107-PG	2a	gi|24641813,gi|24641811,gi|62473677,gi|62473664,gi|62473654	1	236
SLEEEDEESFKR	CG17489-PA,CG17489-PB,CG17489-PC	2a	gi|116007382,gi|116007384,gi|116007388	1	33
SNNLPSDIK	CG2098-PA,CG2098-PC	2a	gi|17864156,gi|24651774	1	14
SPQYEQLGFNLVK	CG32549-PA,CG32549-PB,CG32549-PD,CG32549-PE,CG32549-PF	2a	gi|45555998,gi|45555989,gi|24643014,gi|24643016,gi|45555982	1	1
SQALLQEAQELEAAK	CG18255-PA,CG18255-PD	2a	gi|24653966,gi|24653978	1	9
SSPTTSTPTTPGGSAQPLFK	CG34417-PD,CG34417-PG	2a	gi|161077598,gi|45554288	1	1
STGDEDDVIEDVTSK	CG9432-PB,CG9432-PD	2a	gi|24586058,gi|116007558	1	102
STVPFATSESNR	CG6416-PA,CG6416-PE,CG6416-PF,CG6416-PJ	2a	gi|24661058,gi|28574406,gi|28574408,gi|45552078	1	5
STVPNQYQR	CG6416-PB,CG6416-PH	2a	gi|45550577,gi|28574412	0	33
SYDAFLASESLIK	CG7283-PA,CG7283-PC	2a	gi|24662946,gi|24662954	1	26
SYMSFPTLPNSSFK	CG33950-PA,CG33950-PC,CG33950-PD,CG33950-PE,CG33950-PF,CG33950-PG	2a	gi|78706472,gi|78706464,gi|78706466,gi|78706468,gi|78706474,gi|161077537	0	871
TDEGDLYTTSYK	CG33950-PA,CG33950-PC,CG33950-PD,CG33950-PE,CG33950-PF,CG33950-PG	2a	gi|78706472,gi|78706464,gi|78706466,gi|78706468,gi|78706474,gi|161077537	0	871
TDGDKKGAR	CG6476-PB,CG6476-PC	2a	gi|24647046,gi|24647048	0	3
TNEIVGDQSVLQDQQNK	CG33715-PB,CG33715-PD	2a	gi|161076702,gi|161076705	1	109
TPVSPYLNYDSR	CG40042-PA,CG40042-PB	2a	gi|62862480,gi|161075876	1	4
TSDEFLNDLSEK	CG33715-PB,CG33715-PD	2a	gi|161076702,gi|161076705	0	109
TSSIDLSGVAER	CG18255-PA,CG18255-PC,CG18255-PF	2a	gi|24653966,gi|24653968,gi|24653970	0	9
TVYEAPLYQR	CG5174-PA,CG5174-PB,CG5174-PJ	2a	gi|24655026,gi|24655036,gi|24655017	1	15
VAVGGNYDASER	CG11140-PA,CG11140-PB,CG11140-PC,CG11140-PD,CG11140-PE,CG11140-PF,CG11140-PG,CG11140-PI	2a	gi|24586252,gi|24586254,gi|24586256,gi|24586258,gi|45552499,gi|45551030,gi|45551031,gi|24586250	1	23
VEEGVLVATVDNFK	CG6988-PA,CG6988-PB	2a	gi|17647799,gi|24664518	1	73
VELSEENYVK	CG1318-PA,CG1318-PB,CG1318-PD	2a	gi|17647501,gi|24657468,gi|24657474	0	3
VFEVSLADLQK	CG2168-PA,CG2168-PB	2a	gi|17864162,gi|24638499	1	33
VGANADLQCGADESR	CG33950-PA,CG33950-PC,CG33950-PD,CG33950-PE,CG33950-PF,CG33950-PG	2a	gi|78706472,gi|78706464,gi|78706466,gi|78706468,gi|78706474,gi|161077537	1	871
VIDFNLDR	CG6988-PA,CG6988-PD	2a	gi|17647799,gi|24664525	1	73
VINANNFQR	CG11140-PA,CG11140-PB,CG11140-PC,CG11140-PD,CG11140-PE,CG11140-PF,CG11140-PG,CG11140-PI	2a	gi|24586252,gi|24586254,gi|24586256,gi|24586258,gi|45552499,gi|45551030,gi|45551031,gi|24586250	1	23
VIPGTVDVGQVNIK	CG33715-PB,CG33715-PD	2a	gi|161076702,gi|161076705	0	109
VKDQTANIPAPDSLDR	CG33715-PB,CG33715-PD	2a	gi|161076702,gi|161076705	0	109
VLDTFDELFAK	CG33715-PB,CG33715-PD	2a	gi|161076702,gi|161076705	1	109
VLGDNEDEQIGIVPSK	CG1725-PA,CG1725-PB,CG1725-PD,CG1725-PE,CG1725-PG,CG1725-PH,CG1725-PK,CG1725-PL	2a	gi|24641280,gi|45554813,gi|24641282,gi|45554818,gi|45554804,gi|45554791,gi|161077752,gi|161077754	1	10
VLIESTELNDDQYR	CG17927-PC,CG17927-PD,CG17927-PI	2a	gi|24584692,gi|24584702,gi|24584706	1	38
VLVSSNFESVALDK	CG6988-PA,CG6988-PD	2a	gi|17647799,gi|24664525	1	73
VNAGSLSEQAGLQPGDAVVK	CG30084-PA,CG30084-PC,CG30084-PE,CG30084-PF,CG30084-PG	2a	gi|78707559,gi|78709100,gi|78707228,gi|161077121,gi|116007706	1	100
VPSRPQPESDFHNFR	CG31764-PA,CG31764-PB,CG31764-PC	2a	gi|24583894,gi|24583896,gi|45552331	1	2
VPTTDELYPTLATK	CG33715-PB,CG33715-PD	2a	gi|161076702,gi|161076705	1	109
VSTTVAR	CG4863-PA,CG4863-PB,CG4863-PE	2a	gi|17737907,gi|24645877,gi|24645879	0	24
VTGTDIPSAQYGGR	CG5028-PA,CG5028-PB,CG5028-PC,CG5028-PD	2a	gi|24650122,gi|161078633,gi|161078635,gi|161078637	1	59
VTLENDFGR	CG18255-PA,CG18255-PC,CG18255-PF	2a	gi|24653966,gi|24653968,gi|24653970	0	9
WTELQGQLMCEQLDR	CG2098-PA,CG2098-PC	2a	gi|17864156,gi|24651774	1	14
YDDCCDLSTVASR	CG33715-PB,CG33715-PD	2a	gi|161076702,gi|161076705	0	109
YDEVAR	CG4898-PB,CG4898-PD,CG4898-PE,CG4898-PF,CG4898-PG,CG4898-PJ,CG4898-PK	2a	gi|45551896,gi|24647073,gi|45551900,gi|45551898,gi|24647075,gi|24647077,gi|45553377	0	116
YEQGGVGTGFK	CG1106-PA,CG1106-PB,CG1106-PD,CG1106-PF,CG1106-PG,CG1106-PH	2a	gi|24643858,gi|24643856,gi|28571466,gi|28571471,gi|116008559,gi|45553241	1	1
YKDNEDIVIAK	CG6988-PA,CG6988-PD	2a	gi|17647799,gi|24664525	1	73
YQILNPAGIVGVDDPK	CG17927-PB,CG17927-PL,CG17927-PM	2a	gi|24584710,gi|24584714,gi|24584716	1	9
YQILNPAGIVGVDDPKK	CG17927-PB,CG17927-PL,CG17927-PM	2a	gi|24584710,gi|24584714,gi|24584716	1	9
YQLLQVLSK	CG33715-PB,CG33715-PD	2a	gi|161076702,gi|161076705	0	109
YVNPLTENTLAEIEK	CG2098-PA,CG2098-PC	2a	gi|17864156,gi|24651774	1	14
YYTQMQTIR	CG7010-PA,CG7010-PC,CG7010-PD	2a	gi|28571106,gi|24639740,gi|24639744	1	33
AAAKPAAAAPAK	CG5261-PA,CG5261-PB	2b	gi|24582497,gi|20129315	1	69
AAALFANEEEFKK	CG14648-PA,CG14648-PB	2b	gi|21355167,gi|161078016	1	22
AAAPAAVASPAAAATSADASPSPAK	CG6143-PA,CG6143-PB,CG6143-PC	2b	gi|45551590,gi|17864514,gi|45553181	1	3
AAFGNGAMFIEK	CG1516-PA,CG1516-PB,CG1516-PD,CG1516-PE,CG1516-PG,CG1516-PI,CG1516-PJ,CG1516-PK,CG1516-PL	2b	gi|24652210,gi|24652212,gi|24652214,gi|19921944,gi|24652216,gi|24652218,gi|24652220,gi|24652222,gi|24652224	1	469
AAGITYIQYSNIAAR	CG9032-PA,CG9032-PB	2b	gi|17864256,gi|24642319	1	5
AANPQITTVEVVR	CG4217-PA,CG4217-PB	2b	gi|17738065,gi|24648444	1	11
AAPFNNWLDGTR	CG4376-PA,CG4376-PB,CG4376-PC	2b	gi|24639238,gi|24639240,gi|17137758	0	241
AAVPLLAGVESK	CG2139-PA,CG2139-PB,CG2139-PC,CG2139-PD	2b	gi|24651389,gi|45552009,gi|24651387,gi|24651391	1	61
AAVPSGASTGVHEALELR	CG17654-PA,CG17654-PB,CG17654-PC,CG17654-PD,CG17654-PE	2b	gi|17137654,gi|24580914,gi|24580916,gi|24580918,gi|24580920	1	12
AAVSGAVEQATLR	CG5840-PA,CG5840-PB	2b	gi|21358587,gi|24647700	1	28
AAYFGFYDTAR	CG16944-PA,CG16944-PB,CG16944-PC,CG16944-PD	2b	gi|18079273,gi|24641095,gi|24641090,gi|24641092	1	349
ACDWDFDVESFK	CG32019-PA,CG32019-PC,CG32019-PD,CG32019-PE	2b	gi|28558739,gi|45552151,gi|45552153,gi|45552149	0	787
ACNQLGQFLSNR	CG4260-PA,CG4260-PB	2b	gi|28574818,gi|45552169	1	35
ADAGIYTCHGK	CG33950-PA,CG33950-PB,CG33950-PC,CG33950-PD,CG33950-PE,CG33950-PF,CG33950-PG	2b	gi|78706472,gi|78706470,gi|78706464,gi|78706466,gi|78706468,gi|78706474,gi|161077537	0	871
ADAQNGGEAVTVAGGDVGGAR	CG14648-PA,CG14648-PB	2b	gi|21355167,gi|161078016	1	22
ADDGTPFAEILK	CG6058-PA,CG6058-PB,CG6058-PC,CG6058-PD,CG6058-PE,CG6058-PF,CG6058-PG,CG6058-PH	2b	gi|45551983,gi|24650278,gi|24650280,gi|24650282,gi|24650288,gi|24650276,gi|45551985,gi|45553577	1	57
ADDSAIYTCK	CG1915-PA,CG1915-PC	2b	gi|24655827,gi|161080703	0	363
ADELFNEVTQDASGK	CG10844-PA,CG10844-PB,CG10844-PC,CG10844-PD	2b	gi|17352465,gi|17352467,gi|17352469,gi|17352471	1	11
ADESYIVGK	CG1516-PA,CG1516-PB,CG1516-PD,CG1516-PE,CG1516-PG,CG1516-PI,CG1516-PJ,CG1516-PK,CG1516-PL	2b	gi|24652210,gi|24652212,gi|24652214,gi|19921944,gi|24652216,gi|24652218,gi|24652220,gi|24652222,gi|24652224	1	469
ADETATEEAPQFVSALR	CG33519-PB,CG33519-PC	2b	gi|161077453,gi|161077455	1	65
ADGALLLMEAK	CG8189-PA,CG8189-PB	2b	gi|24661884,gi|24661888	1	47
ADGVNILNLGK	CG14792-PA,CG14792-PB,CG14792-PD	2b	gi|17136518,gi|24639112,gi|45551198	1	30
ADIDILSAGDLTEIGEK	CG6214-PA,CG6214-PB,CG6214-PC,CG6214-PD,CG6214-PE,CG6214-PF,CG6214-PG,CG6214-PH,CG6214-PI,CG6214-PJ,CG6214-PK,CG6214-PL,CG6214-PM,CG6214-PN,CG6214-PO,CG6214-PP,CG6214-PQ	2b	gi|45550972,gi|24583969,gi|45552353,gi|45552351,gi|45552349,gi|45552347,gi|45552345,gi|45552343,gi|45552341,gi|45552339,gi|45552337,gi|45552335,gi|45552363,gi|45552361,gi|45552359,gi|45552357,gi|45552355	1	3
ADIGEVFAK	CG12013-PA,CG12013-PB,CG12013-PC,CG12013-PD	2b	gi|24656777,gi|21356883,gi|24656767,gi|24656772	1	55
ADIGVAMGIAGSDVSK	CG5670-PA,CG5670-PB,CG5670-PC,CG5670-PD,CG5670-PE,CG5670-PF,CG5670-PG,CG5670-PH	2b	gi|24648576,gi|24648578,gi|24648580,gi|24648582,gi|45553441,gi|45553439,gi|45553437,gi|45553435	1	209
ADKLNEEVR	CG4843-PA,CG4843-PB,CG4843-PC	2b	gi|28571726,gi|24647095,gi|45551906	1	131
ADKLNEEVRDLEK	CG4843-PA,CG4843-PB,CG4843-PC	2b	gi|28571726,gi|24647095,gi|45551906	1	131
ADLAEQAISK	CG17927-PA,CG17927-PB,CG17927-PC,CG17927-PD,CG17927-PE,CG17927-PF,CG17927-PG,CG17927-PH,CG17927-PI,CG17927-PJ,CG17927-PK,CG17927-PL,CG17927-PM	2b	gi|24584704,gi|24584710,gi|24584692,gi|24584702,gi|24584696,gi|24584700,gi|24584694,gi|28574239,gi|24584706,gi|24584698,gi|24584712,gi|24584714,gi|24584716	1	2330
ADMSTIAAHNVLR	CG9331-PA,CG9331-PB,CG9331-PC,CG9331-PD,CG9331-PE	2b	gi|45551003,gi|24585514,gi|28574284,gi|28574282,gi|45552429	1	11
ADNLIENHDYSFR	CG32019-PA,CG32019-PC,CG32019-PD,CG32019-PE	2b	gi|28558739,gi|45552151,gi|45552153,gi|45552149	1	787
ADQEISGLK	CG17927-PA,CG17927-PB,CG17927-PC,CG17927-PD,CG17927-PE,CG17927-PF,CG17927-PG,CG17927-PH,CG17927-PI,CG17927-PJ,CG17927-PK,CG17927-PL,CG17927-PM	2b	gi|24584704,gi|24584710,gi|24584692,gi|24584702,gi|24584696,gi|24584700,gi|24584694,gi|28574239,gi|24584706,gi|24584698,gi|24584712,gi|24584714,gi|24584716	1	2330
ADQEISGLKK	CG17927-PA,CG17927-PB,CG17927-PC,CG17927-PD,CG17927-PE,CG17927-PF,CG17927-PG,CG17927-PH,CG17927-PI,CG17927-PJ,CG17927-PK,CG17927-PL,CG17927-PM	2b	gi|24584704,gi|24584710,gi|24584692,gi|24584702,gi|24584696,gi|24584700,gi|24584694,gi|28574239,gi|24584706,gi|24584698,gi|24584712,gi|24584714,gi|24584716	1	2330
ADQLEQGASQFEQQAGK	CG12210-PA,CG12210-PB	2b	gi|17647971,gi|24652377	1	19
ADTAESSLNIIR	CG5939-PA,CG5939-PB,CG5939-PC,CG5939-PD	2b	gi|24661112,gi|24661116,gi|24661120,gi|24661124	1	578
AECTAEEAYTYTK	CG10120-PA,CG10120-PB	2b	gi|24646388,gi|24646386	1	7
AEDAGVYLVVAR	CG1915-PA,CG1915-PC	2b	gi|24655827,gi|161080703	0	363
AEDLVLGDVVEVK	CG5670-PA,CG5670-PB,CG5670-PC,CG5670-PD,CG5670-PE,CG5670-PF,CG5670-PG,CG5670-PH	2b	gi|24648576,gi|24648578,gi|24648580,gi|24648582,gi|45553441,gi|45553439,gi|45553437,gi|45553435	1	209
AEECVQCFCFGVAK	CG33950-PA,CG33950-PB,CG33950-PC,CG33950-PD,CG33950-PE,CG33950-PF,CG33950-PG	2b	gi|78706472,gi|78706470,gi|78706464,gi|78706466,gi|78706468,gi|78706474,gi|161077537	0	871
AEELATAQFNATK	CG31349-PA,CG31349-PB,CG31349-PC,CG31349-PE,CG31349-PF,CG31349-PG,CG31349-PH	2b	gi|28573157,gi|28573161,gi|28573159,gi|28573155,gi|28573163,gi|161078102,gi|161078104	0	2
AEELHAAEVK	CG17927-PA,CG17927-PB,CG17927-PC,CG17927-PD,CG17927-PE,CG17927-PF,CG17927-PG,CG17927-PH,CG17927-PI,CG17927-PJ,CG17927-PK,CG17927-PL,CG17927-PM	2b	gi|24584704,gi|24584710,gi|24584692,gi|24584702,gi|24584696,gi|24584700,gi|24584694,gi|28574239,gi|24584706,gi|24584698,gi|24584712,gi|24584714,gi|24584716	1	2330
AEELSFPK	CG1516-PA,CG1516-PB,CG1516-PD,CG1516-PE,CG1516-PG,CG1516-PI,CG1516-PJ,CG1516-PK,CG1516-PL	2b	gi|24652210,gi|24652212,gi|24652214,gi|19921944,gi|24652216,gi|24652218,gi|24652220,gi|24652222,gi|24652224	1	469
AEIGIAMGSGTAVAK	CG3725-PA,CG3725-PB,CG3725-PC,CG3725-PD,CG3725-PE,CG3725-PF,CG3725-PG,CG3725-PH	2b	gi|17136664,gi|24762445,gi|24762447,gi|24762449,gi|24762451,gi|24762453,gi|24762455,gi|24762457	1	581
AEITWLNNENK	CG15009-PA,CG15009-PB,CG15009-PC	2b	gi|45549192,gi|24657376,gi|45551513	1	10
AENQYGLSDPLDIIEPIVAK	CG32019-PA,CG32019-PC,CG32019-PD,CG32019-PE	2b	gi|28558739,gi|45552151,gi|45552153,gi|45552149	1	787
AESQLAYELQAAK	CG32593-PA,CG32593-PB,CG32593-PC,CG32593-PD,CG32593-PE,CG32593-PF	2b	gi|24642027,gi|24642031,gi|24642061,gi|24642065,gi|24642029,gi|24642033	1	32
AFNDVGHSSEAR	CG3566-PB,CG3566-PC	2b	gi|45549316,gi|45554235	1	10
AFVWPVGQQVQR	CG8200-PA,CG8200-PB	2b	gi|17137546,gi|24653894	1	28
AGAFTVLCSDEEEAAR	CG4233-PA,CG4233-PB,CG4233-PC	2b	gi|24580970,gi|24580972,gi|19920542	1	88
AGDPVILEEAK	CG6084-PA,CG6084-PB	2b	gi|24662781,gi|24662785	1	3
AGEAFTSTTIFCSSK	CG1915-PA,CG1915-PC	2b	gi|24655827,gi|161080703	1	363
AGEPETPEGEEDAK	CG7107-PA,CG7107-PB,CG7107-PD,CG7107-PE,CG7107-PF,CG7107-PG	2b	gi|24641813,gi|24641811,gi|24641815,gi|62473677,gi|62473664,gi|62473654	1	236
AGEPVNLNIPISGAPTPTIEWK	CG32019-PA,CG32019-PC,CG32019-PD,CG32019-PE	2b	gi|28558739,gi|45552151,gi|45552153,gi|45552149	0	787
AGFSDPSDATEPHLAKPR	CG32019-PA,CG32019-PC,CG32019-PD,CG32019-PE	2b	gi|28558739,gi|45552151,gi|45552153,gi|45552149	0	787
AGGVVEAAISYTGDVSDPK	CG1516-PA,CG1516-PB,CG1516-PD,CG1516-PE,CG1516-PG,CG1516-PI,CG1516-PJ,CG1516-PK,CG1516-PL	2b	gi|24652210,gi|24652212,gi|24652214,gi|19921944,gi|24652216,gi|24652218,gi|24652220,gi|24652222,gi|24652224	1	469
AGIASEAQK	CG9244-PB,CG9244-PC	2b	gi|17864292,gi|161076999	1	473
AGKPPAEAAQEGLR	CG1827-PA,CG1827-PB	2b	gi|28573318,gi|24652135	0	2
AGLEVYQGDAAAR	CG8042-PA,CG8042-PB	2b	gi|21356345,gi|24660536	1	4
AGNPVLNYLQSGDGQFVK	CG10924-PA,CG10924-PB	2b	gi|24655082,gi|161077226	1	21
AGNVFEFDVPVTGEPLPSK	CG32019-PA,CG32019-PC,CG32019-PD,CG32019-PE	2b	gi|28558739,gi|45552151,gi|45552153,gi|45552149	1	787
AGNVVHLYER	CG1516-PA,CG1516-PB,CG1516-PD,CG1516-PE,CG1516-PG,CG1516-PI,CG1516-PJ,CG1516-PK,CG1516-PL	2b	gi|24652210,gi|24652212,gi|24652214,gi|19921944,gi|24652216,gi|24652218,gi|24652220,gi|24652222,gi|24652224	1	469
AGPSDPSDVSK	CG32019-PA,CG32019-PC,CG32019-PD,CG32019-PE	2b	gi|28558739,gi|45552151,gi|45552153,gi|45552149	0	787
AGPSEPSQPTDNHLCK	CG32019-PA,CG32019-PC,CG32019-PD,CG32019-PE	2b	gi|28558739,gi|45552151,gi|45552153,gi|45552149	1	787
AGPVVDVLGDEMTR	CG7176-PA,CG7176-PB,CG7176-PC,CG7176-PD,CG7176-PE,CG7176-PF,CG7176-PG	2b	gi|24660860,gi|24660849,gi|21356561,gi|24660856,gi|24660864,gi|24660868,gi|28574947	1	35
AGQAIDQGVNR	CG1648-PA,CG1648-PB	2b	gi|19921938,gi|24652180	1	9
AGSSVFSVFSQK	CG2184-PA,CG2184-PB	2b	gi|17933672,gi|45552007	1	196
AGTAIDNIEEDFR	CG4376-PA,CG4376-PB,CG4376-PC	2b	gi|24639238,gi|24639240,gi|17137758	1	241
AGVLGQMEEFR	CG17927-PA,CG17927-PB,CG17927-PC,CG17927-PD,CG17927-PE,CG17927-PF,CG17927-PG,CG17927-PH,CG17927-PI,CG17927-PJ,CG17927-PK,CG17927-PL,CG17927-PM	2b	gi|24584704,gi|24584710,gi|24584692,gi|24584702,gi|24584696,gi|24584700,gi|24584694,gi|28574239,gi|24584706,gi|24584698,gi|24584712,gi|24584714,gi|24584716	1	2330
AGVLGQMEEFRDER	CG17927-PA,CG17927-PB,CG17927-PC,CG17927-PD,CG17927-PE,CG17927-PF,CG17927-PG,CG17927-PH,CG17927-PI,CG17927-PJ,CG17927-PK,CG17927-PL,CG17927-PM	2b	gi|24584704,gi|24584710,gi|24584692,gi|24584702,gi|24584696,gi|24584700,gi|24584694,gi|28574239,gi|24584706,gi|24584698,gi|24584712,gi|24584714,gi|24584716	1	2330
AIANECQANFISVK	CG2331-PA,CG2331-PB,CG2331-PC,CG2331-PD	2b	gi|17137560,gi|24652279,gi|161076486,gi|161076488	1	19
AIELALGK	CG4233-PA,CG4233-PB,CG4233-PC	2b	gi|24580970,gi|24580972,gi|19920542	1	88
AIELLGGK	CG4094-PA,CG4094-PB	2b	gi|24640177,gi|24640179	1	30
AIESGLVDPLAGGETTVEAYR	CG3059-PA,CG3059-PB,CG3059-PC,CG3059-PD	2b	gi|17137562,gi|24581283,gi|24581286,gi|24581288	1	1
AIFGESDALIAEK	CG2171-PA,CG2171-PB,CG2171-PC	2b	gi|28572004,gi|28572006,gi|28572008	1	22
AIIEILAR	CG5730-PA,CG5730-PB,CG5730-PC,CG5730-PD	2b	gi|17136266,gi|17136264,gi|45553447,gi|45553445	1	61
AILIEDEGEQR	CG11198-PA,CG11198-PB,CG11198-PC,CG11198-PD	2b	gi|24586458,gi|24586460,gi|161076407,gi|161076409	1	52
AINAAGPGEPSDASKPIITKPR	CG32019-PA,CG32019-PC,CG32019-PD,CG32019-PE	2b	gi|28558739,gi|45552151,gi|45552153,gi|45552149	1	787
AINEEGESDPLDSDDSIIAK	CG32019-PA,CG32019-PC,CG32019-PD,CG32019-PE	2b	gi|28558739,gi|45552151,gi|45552153,gi|45552149	1	787
AINEYGEAVTTATMK	CG1915-PA,CG1915-PC	2b	gi|24655827,gi|161080703	0	363
AINNYGEDR	CG1915-PA,CG1915-PC	2b	gi|24655827,gi|161080703	0	363
AIVVTDGER	CG10120-PA,CG10120-PB	2b	gi|24646388,gi|24646386	1	7
AKLDNNEPLK	CG7176-PA,CG7176-PB,CG7176-PC,CG7176-PD,CG7176-PE,CG7176-PF,CG7176-PG	2b	gi|24660860,gi|24660849,gi|21356561,gi|24660856,gi|24660864,gi|24660868,gi|28574947	1	35
AKLEEVAAK	CG32031-PA,CG32031-PB,CG32031-PC,CG32031-PD,CG32031-PE,CG32031-PF	2b	gi|24661336,gi|24661340,gi|24661344,gi|24661348,gi|161082598,gi|161082600	1	143
ALDFIASK	CG4376-PA,CG4376-PB,CG4376-PC	2b	gi|24639238,gi|24639240,gi|17137758	1	241
ALDSMQASLEAEAK	CG17927-PA,CG17927-PB,CG17927-PC,CG17927-PD,CG17927-PE,CG17927-PF,CG17927-PG,CG17927-PH,CG17927-PI,CG17927-PJ,CG17927-PK,CG17927-PL,CG17927-PM	2b	gi|24584704,gi|24584710,gi|24584692,gi|24584702,gi|24584696,gi|24584700,gi|24584694,gi|28574239,gi|24584706,gi|24584698,gi|24584712,gi|24584714,gi|24584716	1	2330
ALGEQVIQEEAK	CG10097-PA,CG10097-PB	2b	gi|24646271,gi|78706758	0	80
ALGLPIERPK	CG3861-PA,CG3861-PB	2b	gi|24640126,gi|24640124	1	71
ALNLNPTLALIEK	CG5596-PA,CG5596-PB	2b	gi|17136338,gi|17136340	1	40
ALNSFEGYK	CG1640-PA,CG1640-PB,CG1640-PC,CG1640-PD,CG1640-PE,CG1640-PF	2b	gi|24641760,gi|45551451,gi|24641764,gi|24641766,gi|24641768,gi|24641770	1	25
ALQASVLR	CG6058-PA,CG6058-PB,CG6058-PC,CG6058-PD,CG6058-PE,CG6058-PF,CG6058-PG,CG6058-PH	2b	gi|45551983,gi|24650278,gi|24650280,gi|24650282,gi|24650288,gi|24650276,gi|45551985,gi|45553577	1	57
ALQAVYPDYVDELSLYGSK	CG6904-PA,CG6904-PB,CG6904-PC	2b	gi|45551893,gi|21357845,gi|24646982	1	27
ALQNTEWAR	CG3359-PB,CG3359-PC,CG3359-PD,CG3359-PE,CG3359-PF,CG3359-PG,CG3359-PH,CG3359-PI,CG3359-PJ,CG3359-PK,CG3359-PL,CG3359-PM,CG3359-PN,CG3359-PO,CG3359-PP	2b	gi|24646161,gi|24646163,gi|28573039,gi|28573041,gi|28573043,gi|28573045,gi|28573047,gi|28573049,gi|28573051,gi|28573053,gi|28573061,gi|28573055,gi|28573057,gi|28573059,gi|28573037	0	29
ALQPQAGFVTGAQAK	CG1099-PA,CG1099-PB	2b	gi|17137488,gi|17137490	1	1
ALSDEANELLPIFNK	CG8808-PA,CG8808-PB	2b	gi|17137298,gi|161076454	1	1
ALVTETSVLDADEGIR	CG3861-PA,CG3861-PB	2b	gi|24640126,gi|24640124	1	71
ALVVINPGNPTGQVLTR	CG1640-PA,CG1640-PB,CG1640-PC,CG1640-PD,CG1640-PE,CG1640-PF	2b	gi|24641760,gi|45551451,gi|24641764,gi|24641766,gi|24641768,gi|24641770	1	25
AMAGIGTNDTQLIR	CG9968-PA,CG9968-PB	2b	gi|17736989,gi|24642523	1	7
AMNVYSEVK	CG8189-PA,CG8189-PB	2b	gi|24661884,gi|24661888	0	47
AMVDAAR	CG17927-PA,CG17927-PB,CG17927-PC,CG17927-PD,CG17927-PE,CG17927-PF,CG17927-PG,CG17927-PH,CG17927-PI,CG17927-PJ,CG17927-PK,CG17927-PL,CG17927-PM	2b	gi|24584704,gi|24584710,gi|24584692,gi|24584702,gi|24584696,gi|24584700,gi|24584694,gi|28574239,gi|24584706,gi|24584698,gi|24584712,gi|24584714,gi|24584716	0	2330
ANAEAQVWR	CG17927-PA,CG17927-PB,CG17927-PC,CG17927-PD,CG17927-PE,CG17927-PF,CG17927-PG,CG17927-PH,CG17927-PI,CG17927-PJ,CG17927-PK,CG17927-PL,CG17927-PM	2b	gi|24584704,gi|24584710,gi|24584692,gi|24584702,gi|24584696,gi|24584700,gi|24584694,gi|28574239,gi|24584706,gi|24584698,gi|24584712,gi|24584714,gi|24584716	0	2330
ANAIANAAEK	CG17927-PA,CG17927-PB,CG17927-PC,CG17927-PD,CG17927-PE,CG17927-PF,CG17927-PG,CG17927-PH,CG17927-PI,CG17927-PJ,CG17927-PK,CG17927-PL,CG17927-PM	2b	gi|24584704,gi|24584710,gi|24584692,gi|24584702,gi|24584696,gi|24584700,gi|24584694,gi|28574239,gi|24584706,gi|24584698,gi|24584712,gi|24584714,gi|24584716	1	2330
ANALQNELEESR	CG17927-PA,CG17927-PB,CG17927-PC,CG17927-PD,CG17927-PE,CG17927-PF,CG17927-PG,CG17927-PH,CG17927-PI,CG17927-PJ,CG17927-PK,CG17927-PL,CG17927-PM	2b	gi|24584704,gi|24584710,gi|24584692,gi|24584702,gi|24584696,gi|24584700,gi|24584694,gi|28574239,gi|24584706,gi|24584698,gi|24584712,gi|24584714,gi|24584716	1	2330
ANDLSQTLAEEEEK	CG15792-PA,CG15792-PB,CG15792-PC,CG15792-PD	2b	gi|24762816,gi|24762818,gi|62471820,gi|62471805	1	10
ANEVASMVLVGDVK	CG6767-PA,CG6767-PB	2b	gi|21355239,gi|45551540	1	5
ANFDQEINTAK	CG32593-PA,CG32593-PB,CG32593-PC,CG32593-PD,CG32593-PE,CG32593-PF	2b	gi|24642027,gi|24642031,gi|24642061,gi|24642065,gi|24642029,gi|24642033	1	32
ANIVGPWIER	CG4376-PA,CG4376-PB,CG4376-PC	2b	gi|24639238,gi|24639240,gi|17137758	1	241
ANTELEEK	CG4843-PA,CG4843-PB,CG4843-PC	2b	gi|28571726,gi|24647095,gi|45551906	1	131
ANTELEEKEK	CG4843-PA,CG4843-PB,CG4843-PC	2b	gi|28571726,gi|24647095,gi|45551906	1	131
ANWAAVGSLSTNER	CG5413-PA,CG5413-PB,CG5413-PC	2b	gi|24647665,gi|24647667,gi|24647669	1	2
APEDDGGASITGYIVER	CG32019-PA,CG32019-PC,CG32019-PD,CG32019-PE	2b	gi|28558739,gi|45552151,gi|45552153,gi|45552149	1	787
APFGDELPAK	CG9244-PB,CG9244-PC	2b	gi|17864292,gi|161076999	1	473
APSEGSSQQPQAFR	CG33484-PA,CG33484-PB,CG33484-PC,CG33484-PD	2b	gi|45580802,gi|116007758,gi|116007760,gi|116007762	0	226
APVFTVPLENIENLR	CG1915-PA,CG1915-PC	2b	gi|24655827,gi|161080703	1	363
AQDFDTLR	CG17285-PA,CG17285-PB	2b	gi|24664081,gi|24664085	0	257
AQDNVEFNWFR	CG33950-PA,CG33950-PB,CG33950-PC,CG33950-PD,CG33950-PE,CG33950-PF,CG33950-PG	2b	gi|78706472,gi|78706470,gi|78706464,gi|78706466,gi|78706468,gi|78706474,gi|161077537	1	871
AQELWELIVK	CG7107-PA,CG7107-PB,CG7107-PD,CG7107-PE,CG7107-PF,CG7107-PG	2b	gi|24641813,gi|24641811,gi|24641815,gi|62473677,gi|62473664,gi|62473654	1	236
AQLELSQVR	CG17927-PA,CG17927-PB,CG17927-PC,CG17927-PD,CG17927-PE,CG17927-PF,CG17927-PG,CG17927-PH,CG17927-PI,CG17927-PJ,CG17927-PK,CG17927-PL,CG17927-PM	2b	gi|24584704,gi|24584710,gi|24584692,gi|24584702,gi|24584696,gi|24584700,gi|24584694,gi|28574239,gi|24584706,gi|24584698,gi|24584712,gi|24584714,gi|24584716	1	2330
AQNEELEDDLQLTEDAK	CG15792-PA,CG15792-PB,CG15792-PC,CG15792-PD	2b	gi|24762816,gi|24762818,gi|62471820,gi|62471805	1	10
AQQELEEAEER	CG17927-PA,CG17927-PB,CG17927-PC,CG17927-PD,CG17927-PE,CG17927-PF,CG17927-PG,CG17927-PH,CG17927-PI,CG17927-PJ,CG17927-PK,CG17927-PL,CG17927-PM	2b	gi|24584704,gi|24584710,gi|24584692,gi|24584702,gi|24584696,gi|24584700,gi|24584694,gi|28574239,gi|24584706,gi|24584698,gi|24584712,gi|24584714,gi|24584716	1	2330
AQQWAVPYVETSAK	CG2849-PA,CG2849-PB,CG2849-PC	2b	gi|24639552,gi|24639550,gi|17933550	1	1
ASCNTDYYTR	CG7010-PA,CG7010-PB,CG7010-PC,CG7010-PD	2b	gi|28571106,gi|24639746,gi|24639740,gi|24639744	1	33
ASFLAQNSSQVVK	CG17332-PA,CG17332-PB,CG17332-PD	2b	gi|24584671,gi|24584673,gi|24584675	1	6
ASGQHQLQQSVDMGGNLQQAK	CG33484-PA,CG33484-PB,CG33484-PC,CG33484-PD	2b	gi|45580802,gi|116007758,gi|116007760,gi|116007762	0	226
ASRPYSSYLDSPSYR	CG6803-PA,CG6803-PB,CG6803-PC,CG6803-PD,CG6803-PE	2b	gi|24646989,gi|21357797,gi|24646991,gi|24646986,gi|24646984	1	71
ATAADSGEYTVR	CG1915-PA,CG1915-PC	2b	gi|24655827,gi|161080703	0	363
ATAEAICR	CG3725-PA,CG3725-PB,CG3725-PC,CG3725-PD,CG3725-PE,CG3725-PF,CG3725-PG,CG3725-PH	2b	gi|17136664,gi|24762445,gi|24762447,gi|24762449,gi|24762451,gi|24762453,gi|24762455,gi|24762457	0	581
ATCVAFLNIR	CG33484-PA,CG33484-PB,CG33484-PC,CG33484-PD	2b	gi|45580802,gi|116007758,gi|116007760,gi|116007762	0	226
ATDADADITQK	CG5840-PA,CG5840-PB	2b	gi|21358587,gi|24647700	1	28
ATDNVAEIILR	CG9297-PA,CG9297-PB	2b	gi|28571703,gi|28571705	1	40
ATDQTFSEK	CG17927-PA,CG17927-PB,CG17927-PC,CG17927-PD,CG17927-PE,CG17927-PF,CG17927-PG,CG17927-PH,CG17927-PI,CG17927-PJ,CG17927-PK,CG17927-PL,CG17927-PM	2b	gi|24584704,gi|24584710,gi|24584692,gi|24584702,gi|24584696,gi|24584700,gi|24584694,gi|28574239,gi|24584706,gi|24584698,gi|24584712,gi|24584714,gi|24584716	0	2330
ATEVIYK	CG16944-PA,CG16944-PB,CG16944-PC,CG16944-PD	2b	gi|18079273,gi|24641095,gi|24641090,gi|24641092	1	349
ATIPDLVEGQTYK	CG32019-PA,CG32019-PC,CG32019-PD,CG32019-PE	2b	gi|28558739,gi|45552151,gi|45552153,gi|45552149	1	787
ATLYPCPEAPADR	CG1709-PA,CG1709-PB,CG1709-PC,CG1709-PD,CG1709-PE,CG1709-PF,CG1709-PG,CG1709-PH	2b	gi|24650959,gi|24650965,gi|24650956,gi|24650967,gi|21358171,gi|24650961,gi|24650963,gi|45551995	1	17
ATNPIAMDTIFR	CG10924-PA,CG10924-PB	2b	gi|24655082,gi|161077226	0	21
ATNQLGEAVNTCNVR	CG1915-PA,CG1915-PC	2b	gi|24655827,gi|161080703	0	363
ATNQVGEAVSTSSLK	CG1915-PA,CG1915-PC	2b	gi|24655827,gi|161080703	0	363
ATNVHFSGRETPYLALPADYMGNQLK	CG33950-PA,CG33950-PB,CG33950-PC,CG33950-PD,CG33950-PE,CG33950-PF,CG33950-PG	2b	gi|78706472,gi|78706470,gi|78706464,gi|78706466,gi|78706468,gi|78706474,gi|161077537	0	871
ATQAEMQAALESNK	CG17896-PA,CG17896-PB	2b	gi|24638878,gi|24638876	1	16
ATSVQWFR	CG1915-PA,CG1915-PC	2b	gi|24655827,gi|161080703	0	363
ATTPVEFVMEVTDK	CG4347-PA,CG4347-PC	2b	gi|62484278,gi|62484452	1	69
ATVPTLNENCEYEFR	CG32019-PA,CG32019-PC,CG32019-PD,CG32019-PE	2b	gi|28558739,gi|45552151,gi|45552153,gi|45552149	0	787
AVDLTDWDKDHADLK	CG32019-PA,CG32019-PC,CG32019-PD,CG32019-PE	2b	gi|28558739,gi|45552151,gi|45552153,gi|45552149	1	787
AVDYVVPGPGK	CG7176-PA,CG7176-PB,CG7176-PC,CG7176-PD,CG7176-PE,CG7176-PF,CG7176-PG	2b	gi|24660860,gi|24660849,gi|21356561,gi|24660856,gi|24660864,gi|24660868,gi|28574947	1	35
AVEVEQCR	CG33950-PA,CG33950-PB,CG33950-PC,CG33950-PD,CG33950-PE,CG33950-PF,CG33950-PG	2b	gi|78706472,gi|78706470,gi|78706464,gi|78706466,gi|78706468,gi|78706474,gi|161077537	0	871
AVFFVER	CG15081-PA,CG15081-PB,CG15081-PC,CG15081-PD,CG15081-PE,CG15081-PF	2b	gi|161077238,gi|161077236,gi|161077234,gi|161077240,gi|161077242,gi|161077244	1	25
AVFSNLGIQCVK	CG6667-PA,CG6667-PB,CG6667-PC	2b	gi|24584822,gi|24584824,gi|24584826	0	2
AVGHVNDTLGPELIK	CG17654-PA,CG17654-PB,CG17654-PC,CG17654-PD,CG17654-PE	2b	gi|17137654,gi|24580914,gi|24580916,gi|24580918,gi|24580920	1	12
AVIIYVPIPQQK	CG1883-PA,CG1883-PB,CG1883-PC,CG1883-PD	2b	gi|21358459,gi|24651339,gi|24651337,gi|45553763	1	25
AVNAIGESDPLEAVNTIIAK	CG32019-PA,CG32019-PC,CG32019-PD,CG32019-PE	2b	gi|28558739,gi|45552151,gi|45552153,gi|45552149	1	787
AVNAIGQSDPATFK	CG32019-PA,CG32019-PC,CG32019-PD,CG32019-PE	2b	gi|28558739,gi|45552151,gi|45552153,gi|45552149	1	787
AVNALGQAVSSTNLR	CG1915-PA,CG1915-PC	2b	gi|24655827,gi|161080703	0	363
AVNEEGESEPLETESAITAK	CG32019-PA,CG32019-PC,CG32019-PD,CG32019-PE	2b	gi|28558739,gi|45552151,gi|45552153,gi|45552149	1	787
AVNELGQAVTSASLIVQSK	CG1915-PA,CG1915-PC	2b	gi|24655827,gi|161080703	0	363
AVNPLGEAVTTASMR	CG1915-PA,CG1915-PC	2b	gi|24655827,gi|161080703	0	363
AVNSEGESEPLVTDIPTK	CG32019-PA,CG32019-PC,CG32019-PD,CG32019-PE	2b	gi|28558739,gi|45552151,gi|45552153,gi|45552149	1	787
AVQQQLIDDHFLFK	CG32031-PA,CG32031-PB,CG32031-PC,CG32031-PD,CG32031-PE,CG32031-PF	2b	gi|24661336,gi|24661340,gi|24661344,gi|24661348,gi|161082598,gi|161082600	1	143
AVSFVGSDQAGK	CG17896-PA,CG17896-PB	2b	gi|24638878,gi|24638876	1	16
AYNAAGEAVSSTAMK	CG1915-PA,CG1915-PC	2b	gi|24655827,gi|161080703	1	363
AYNAMGQDTTVAQLTVISK	CG1915-PA,CG1915-PC	2b	gi|24655827,gi|161080703	0	363
CAAGYVGDATR	CG33950-PA,CG33950-PB,CG33950-PC,CG33950-PD,CG33950-PE,CG33950-PF,CG33950-PG	2b	gi|78706472,gi|78706470,gi|78706464,gi|78706466,gi|78706468,gi|78706474,gi|161077537	1	871
CATITPDEK	CG7176-PA,CG7176-PB,CG7176-PC,CG7176-PD,CG7176-PE,CG7176-PF,CG7176-PG	2b	gi|24660860,gi|24660849,gi|21356561,gi|24660856,gi|24660864,gi|24660868,gi|28574947	1	35
CDGDCIVQSPSKPEKPTTPGSEK	CG1915-PA,CG1915-PC	2b	gi|24655827,gi|161080703	1	363
CDGENDCGDNSDETSCDPEPSGAPCR	CG33950-PA,CG33950-PB,CG33950-PC,CG33950-PD,CG33950-PE,CG33950-PF,CG33950-PG	2b	gi|78706472,gi|78706470,gi|78706464,gi|78706466,gi|78706468,gi|78706474,gi|161077537	0	871
CDIFIPAAVEK	CG5320-PA,CG5320-PB,CG5320-PE,CG5320-PF	2b	gi|45549226,gi|24649460,gi|45553473,gi|45553475	1	156
CDIGNPLESGK	CG9623-PA,CG9623-PB	2b	gi|24642643,gi|24642641	0	16
CEAQWFSSEWSK	CG33103-PA,CG33103-PB	2b	gi|28572036,gi|28572038	0	438
CEEFQYGGCYGTNNR	CG33103-PA,CG33103-PB	2b	gi|28572036,gi|28572038	1	438
CEQCAAGYQGNPLAAGGICR	CG33950-PA,CG33950-PB,CG33950-PC,CG33950-PD,CG33950-PE,CG33950-PF,CG33950-PG	2b	gi|78706472,gi|78706470,gi|78706464,gi|78706466,gi|78706468,gi|78706474,gi|161077537	0	871
CFACGFPVEAGDR	CG30084-PA,CG30084-PC,CG30084-PE,CG30084-PF,CG30084-PG,CG30084-PH	2b	gi|78707559,gi|78709100,gi|78707228,gi|161077121,gi|116007706,gi|161077123	0	100
CFLDVGLAR	CG17489-PA,CG17489-PB,CG17489-PC,CG17489-PD,CG17489-PE	2b	gi|116007382,gi|116007384,gi|116007388,gi|116007390,gi|116007386	1	33
CGLGELSLPENEPGSSIMPGK	CG4094-PA,CG4094-PB	2b	gi|24640177,gi|24640179	1	30
CGSVFCGSNAICK	CG12908-PA,CG12908-PB	2b	gi|24652408,gi|45552547	0	41
CIADLSALALR	CG8189-PA,CG8189-PB	2b	gi|24661884,gi|24661888	1	47
CIIPNEMK	CG17927-PA,CG17927-PB,CG17927-PC,CG17927-PD,CG17927-PE,CG17927-PF,CG17927-PG,CG17927-PH,CG17927-PI,CG17927-PJ,CG17927-PK,CG17927-PL,CG17927-PM	2b	gi|24584704,gi|24584710,gi|24584692,gi|24584702,gi|24584696,gi|24584700,gi|24584694,gi|28574239,gi|24584706,gi|24584698,gi|24584712,gi|24584714,gi|24584716	1	2330
CLALAVADSPMKPDEMDLGDSTK	CG3725-PA,CG3725-PB,CG3725-PC,CG3725-PD,CG3725-PE,CG3725-PF,CG3725-PG,CG3725-PH	2b	gi|17136664,gi|24762445,gi|24762447,gi|24762449,gi|24762451,gi|24762453,gi|24762455,gi|24762457	1	581
CLSQEPPAPTPPR	CG33103-PA,CG33103-PB	2b	gi|28572036,gi|28572038	1	438
CNETLDTQQK	CG17927-PA,CG17927-PB,CG17927-PC,CG17927-PD,CG17927-PE,CG17927-PF,CG17927-PG,CG17927-PH,CG17927-PI,CG17927-PJ,CG17927-PK,CG17927-PL,CG17927-PM	2b	gi|24584704,gi|24584710,gi|24584692,gi|24584702,gi|24584696,gi|24584700,gi|24584694,gi|28574239,gi|24584706,gi|24584698,gi|24584712,gi|24584714,gi|24584716	1	2330
CNSGQCVSSSVR	CG33950-PA,CG33950-PB,CG33950-PC,CG33950-PD,CG33950-PE,CG33950-PF,CG33950-PG	2b	gi|78706472,gi|78706470,gi|78706464,gi|78706466,gi|78706468,gi|78706474,gi|161077537	1	871
CPDMRPQDSGAYSCEIINTR	CG33950-PA,CG33950-PB,CG33950-PC,CG33950-PD,CG33950-PE,CG33950-PF,CG33950-PG	2b	gi|78706472,gi|78706470,gi|78706464,gi|78706466,gi|78706468,gi|78706474,gi|161077537	1	871
CPEGYLGLSCEQCAPGYAR	CG33950-PA,CG33950-PB,CG33950-PC,CG33950-PD,CG33950-PE,CG33950-PF,CG33950-PG	2b	gi|78706472,gi|78706470,gi|78706464,gi|78706466,gi|78706468,gi|78706474,gi|161077537	1	871
CPYGYELSEDSQR	CG12908-PA,CG12908-PB	2b	gi|24652408,gi|45552547	0	41
CQCPPGYVGDSCESCASGYVR	CG33950-PA,CG33950-PB,CG33950-PC,CG33950-PD,CG33950-PE,CG33950-PF,CG33950-PG	2b	gi|78706472,gi|78706470,gi|78706464,gi|78706466,gi|78706468,gi|78706474,gi|161077537	0	871
CQSFYYGGCGGNDNR	CG33103-PA,CG33103-PB	2b	gi|28572036,gi|28572038	0	438
CSANLVVEER	CG1915-PA,CG1915-PC	2b	gi|24655827,gi|161080703	0	363
CSEFTNEICAK	CG12233-PA,CG12233-PB	2b	gi|24643268,gi|24643270	1	132
CSLAVPEITK	CG2216-PA,CG2216-PB,CG2216-PC,CG2216-PD,CG2216-PE	2b	gi|17933722,gi|24651356,gi|24651358,gi|24651360,gi|24651362	1	31
CSVNIDIR	CG33103-PA,CG33103-PB	2b	gi|28572036,gi|28572038	0	438
CTACVKPITGIGGTR	CG32171-PA,CG32171-PB,CG32171-PC,CG32171-PD,CG32171-PE,CG32171-PF,CG32171-PG,CG32171-PH	2b	gi|45550635,gi|21356031,gi|24665618,gi|24665611,gi|45553169,gi|45553167,gi|45553165,gi|45553163	1	62
CTYVQEFDGER	CG12908-PA,CG12908-PB	2b	gi|24652408,gi|45552547	0	41
CVPFYYSGCGGNK	CG33103-PA,CG33103-PB	2b	gi|28572036,gi|28572038	0	438
DAAENSLIAYK	CG31196-PA,CG31196-PB,CG31196-PC,CG31196-PD	2b	gi|24647885,gi|24647887,gi|24647891,gi|24647889	1	30
DADAAASGTVATDSDTTTDNDKNFENSEK	CG4538-PA,CG4538-PB	2b	gi|24648289,gi|24648291	1	1
DAEMIENTLFR	CG33519-PB,CG33519-PC	2b	gi|161077453,gi|161077455	1	65
DAHQSLLATR	CG1516-PA,CG1516-PB,CG1516-PD,CG1516-PE,CG1516-PG,CG1516-PI,CG1516-PJ,CG1516-PK,CG1516-PL	2b	gi|24652210,gi|24652212,gi|24652214,gi|19921944,gi|24652216,gi|24652218,gi|24652220,gi|24652222,gi|24652224	1	469
DALNSALDDELAR	CG11876-PA,CG11876-PB,CG11876-PC,CG11876-PD	2b	gi|24650940,gi|24650943,gi|24650945,gi|21358145	1	71
DALNSALDDELARDDR	CG11876-PA,CG11876-PB,CG11876-PC,CG11876-PD	2b	gi|24650940,gi|24650943,gi|24650945,gi|21358145	1	71
DAPTTESYLR	CG6416-PA,CG6416-PB,CG6416-PE,CG6416-PF,CG6416-PG,CG6416-PH,CG6416-PI,CG6416-PJ	2b	gi|24661058,gi|45550577,gi|28574406,gi|28574408,gi|28574410,gi|28574412,gi|28574416,gi|45552078	1	33
DASESDSGVYTCVAYDVR	CG33950-PA,CG33950-PB,CG33950-PC,CG33950-PD,CG33950-PE,CG33950-PF,CG33950-PG	2b	gi|78706472,gi|78706470,gi|78706464,gi|78706466,gi|78706468,gi|78706474,gi|161077537	0	871
DATENFEDVGHSNDAR	CG2140-PA,CG2140-PB	2b	gi|24586293,gi|24586291	1	63
DCGDDDLCESNLIIR	CG1771-PA,CG1771-PB	2b	gi|24641711,gi|24641709	0	3
DCVIDLVGYR	CG11661-PA,CG11661-PB,CG11661-PC,CG11661-PE,CG11661-PF,CG11661-PG,CG11661-PH,CG11661-PI	2b	gi|24665669,gi|24665673,gi|24665677,gi|28574585,gi|28574590,gi|28574592,gi|161084450,gi|161084461	1	218
DDDNDDNDDDDDQDIR	CG17285-PA,CG17285-PB	2b	gi|24664081,gi|24664085	1	257
DDGGEPVESYLVEK	CG32019-PA,CG32019-PC,CG32019-PD,CG32019-PE	2b	gi|28558739,gi|45552151,gi|45552153,gi|45552149	1	787
DDGGIPITGYVIEK	CG32019-PA,CG32019-PC,CG32019-PD,CG32019-PE	2b	gi|28558739,gi|45552151,gi|45552153,gi|45552149	1	787
DDGGSEITHYVVEK	CG32019-PA,CG32019-PC,CG32019-PD,CG32019-PE	2b	gi|28558739,gi|45552151,gi|45552153,gi|45552149	1	787
DDGLGVENLR	CG11198-PA,CG11198-PB,CG11198-PC,CG11198-PD	2b	gi|24586458,gi|24586460,gi|161076407,gi|161076409	1	52
DDNTQPFVLPSVR	CG4233-PA,CG4233-PB,CG4233-PC	2b	gi|24580970,gi|24580972,gi|19920542	1	88
DDVPLYNNER	CG33103-PA,CG33103-PB	2b	gi|28572036,gi|28572038	0	438
DEDIDGDGVPNSKDEDIDGDGK	CG9297-PA,CG9297-PB	2b	gi|28571703,gi|28571705	1	40
DEFSVENLQDFVEK	CG8983-PA,CG8983-PB	2b	gi|45551086,gi|19922048	1	72
DEKPYCAECFGELFAK	CG32171-PA,CG32171-PB,CG32171-PC,CG32171-PD,CG32171-PE,CG32171-PF,CG32171-PG,CG32171-PH	2b	gi|45550635,gi|21356031,gi|24665618,gi|24665611,gi|45553169,gi|45553167,gi|45553165,gi|45553163	1	62
DELENKPFDYSK	CG6455-PA,CG6455-PB	2b	gi|45549224,gi|24648875	1	49
DFAAGGISAAVSK	CG16944-PA,CG16944-PB,CG16944-PC,CG16944-PD	2b	gi|18079273,gi|24641095,gi|24641090,gi|24641092	1	349
DFDAVGFVK	CG16944-PA,CG16944-PB,CG16944-PC,CG16944-PD	2b	gi|18079273,gi|24641095,gi|24641090,gi|24641092	1	349
DFVYNEEELAAGK	CG8048-PA,CG8048-PB,CG8048-PC,CG8048-PD	2b	gi|17137392,gi|19549828,gi|24654128,gi|28573773	1	6
DGENIESGGHYTVEVK	CG32019-PA,CG32019-PC,CG32019-PD,CG32019-PE	2b	gi|28558739,gi|45552151,gi|45552153,gi|45552149	1	787
DGGSPITNYIIEVMDK	CG32019-PA,CG32019-PC,CG32019-PD,CG32019-PE	2b	gi|28558739,gi|45552151,gi|45552153,gi|45552149	1	787
DGIPMLDTGESPEAPQPR	CG1709-PA,CG1709-PB,CG1709-PC,CG1709-PD,CG1709-PE,CG1709-PF,CG1709-PG,CG1709-PH	2b	gi|24650959,gi|24650965,gi|24650956,gi|24650967,gi|21358171,gi|24650961,gi|24650963,gi|45551995	1	17
DGISEVFDK	CG9244-PB,CG9244-PC	2b	gi|17864292,gi|161076999	1	473
DGISIQTNSDYK	CG33484-PA,CG33484-PB,CG33484-PC,CG33484-PD	2b	gi|45580802,gi|116007758,gi|116007760,gi|116007762	0	226
DGNELLAQLEELEK	CG33484-PA,CG33484-PB,CG33484-PC,CG33484-PD	2b	gi|45580802,gi|116007758,gi|116007760,gi|116007762	1	226
DGPNALTPPK	CG5670-PA,CG5670-PB,CG5670-PC,CG5670-PD,CG5670-PE,CG5670-PF,CG5670-PG,CG5670-PH	2b	gi|24648576,gi|24648578,gi|24648580,gi|24648582,gi|45553441,gi|45553439,gi|45553437,gi|45553435	1	209
DGQPVVETNNVK	CG33519-PB,CG33519-PC	2b	gi|161077453,gi|161077455	1	65
DGVTSPAGSTAAALR	CG5840-PA,CG5840-PB	2b	gi|21358587,gi|24647700	1	28
DHSVYLTNDGR	CG4233-PA,CG4233-PB,CG4233-PC	2b	gi|24580970,gi|24580972,gi|19920542	1	88
DIEDLELNVQK	CG17927-PA,CG17927-PB,CG17927-PC,CG17927-PD,CG17927-PE,CG17927-PF,CG17927-PG,CG17927-PH,CG17927-PI,CG17927-PJ,CG17927-PK,CG17927-PL,CG17927-PM	2b	gi|24584704,gi|24584710,gi|24584692,gi|24584702,gi|24584696,gi|24584700,gi|24584694,gi|28574239,gi|24584706,gi|24584698,gi|24584712,gi|24584714,gi|24584716	1	2330
DIFEDLYNK	CG7176-PA,CG7176-PB,CG7176-PC,CG7176-PD,CG7176-PE,CG7176-PF,CG7176-PG	2b	gi|24660860,gi|24660849,gi|21356561,gi|24660856,gi|24660864,gi|24660868,gi|28574947	1	35
DIGGLEYEAEYPYK	CG12163-PA,CG12163-PB	2b	gi|24644155,gi|24644153	1	1
DIPGLTDTTIPR	CG10944-PA,CG10944-PB,CG10944-PC	2b	gi|24640437,gi|17737290,gi|24640435	1	25
DIQTALEEEQR	CG17927-PA,CG17927-PB,CG17927-PC,CG17927-PD,CG17927-PE,CG17927-PF,CG17927-PG,CG17927-PH,CG17927-PI,CG17927-PJ,CG17927-PK,CG17927-PL,CG17927-PM	2b	gi|24584704,gi|24584710,gi|24584692,gi|24584702,gi|24584696,gi|24584700,gi|24584694,gi|28574239,gi|24584706,gi|24584698,gi|24584712,gi|24584714,gi|24584716	1	2330
DITTTFDGTTAR	CG32019-PA,CG32019-PC,CG32019-PD,CG32019-PE	2b	gi|28558739,gi|45552151,gi|45552153,gi|45552149	1	787
DIVHSGLDYTMER	CG5320-PA,CG5320-PB,CG5320-PE,CG5320-PF	2b	gi|45549226,gi|24649460,gi|45553473,gi|45553475	1	156
DKELSSITAK	CG17927-PA,CG17927-PB,CG17927-PC,CG17927-PD,CG17927-PE,CG17927-PF,CG17927-PG,CG17927-PH,CG17927-PI,CG17927-PJ,CG17927-PK,CG17927-PL,CG17927-PM	2b	gi|24584704,gi|24584710,gi|24584692,gi|24584702,gi|24584696,gi|24584700,gi|24584694,gi|28574239,gi|24584706,gi|24584698,gi|24584712,gi|24584714,gi|24584716	1	2330
DKPLTPNSLVPLEYEPEDK	CG6803-PA,CG6803-PB,CG6803-PC,CG6803-PD,CG6803-PE	2b	gi|24646989,gi|21357797,gi|24646991,gi|24646986,gi|24646984	1	71
DKTEDQVTIDCAEAIK	CG7176-PA,CG7176-PB,CG7176-PC,CG7176-PD,CG7176-PE,CG7176-PF,CG7176-PG	2b	gi|24660860,gi|24660849,gi|21356561,gi|24660856,gi|24660864,gi|24660868,gi|28574947	1	35
DKVDPDLINAGK	CG1140-PA,CG1140-PB	2b	gi|21358325,gi|24655794	1	10
DLAFVDTDDNTPLK	CG40084-PA,CG40084-PB	2b	gi|161076014,gi|161076016	1	4
DLAPGYNDLLLLPEGATNIR	CG33103-PA,CG33103-PB	2b	gi|28572036,gi|28572038	1	438
DLDKDGYLNEEEVK	CG9148-PA,CG9148-PB,CG9148-PC	2b	gi|17137602,gi|17137604,gi|45552855	1	8
DLDQYTK	CG4389-PA,CG4389-PB,CG4389-PC	2b	gi|19921000,gi|24583077,gi|24583079	1	210
DLEEANIQHESTLANLR	CG17927-PA,CG17927-PB,CG17927-PC,CG17927-PD,CG17927-PE,CG17927-PF,CG17927-PG,CG17927-PH,CG17927-PI,CG17927-PJ,CG17927-PK,CG17927-PL,CG17927-PM	2b	gi|24584704,gi|24584710,gi|24584692,gi|24584702,gi|24584696,gi|24584700,gi|24584694,gi|28574239,gi|24584706,gi|24584698,gi|24584712,gi|24584714,gi|24584716	1	2330
DLEEDHACIPLKK	CG2238-PA,CG2238-PB,CG2238-PC	2b	gi|24585709,gi|24585711,gi|24585713	1	30
DLELELEEEK	CG5939-PA,CG5939-PB,CG5939-PC,CG5939-PD	2b	gi|24661112,gi|24661116,gi|24661120,gi|24661124	1	578
DLGQDVDTGR	CG17285-PA,CG17285-PB	2b	gi|24664081,gi|24664085	1	257
DLISDLK	CG5730-PA,CG5730-PB,CG5730-PC,CG5730-PD	2b	gi|17136266,gi|17136264,gi|45553447,gi|45553445	1	61
DLLDQIGEGGR	CG17927-PA,CG17927-PB,CG17927-PC,CG17927-PD,CG17927-PE,CG17927-PF,CG17927-PG,CG17927-PH,CG17927-PI,CG17927-PJ,CG17927-PK,CG17927-PL,CG17927-PM	2b	gi|24584704,gi|24584710,gi|24584692,gi|24584702,gi|24584696,gi|24584700,gi|24584694,gi|28574239,gi|24584706,gi|24584698,gi|24584712,gi|24584714,gi|24584716	1	2330
DLLISVVGGDIIK	CG33519-PB,CG33519-PC	2b	gi|161077453,gi|161077455	0	65
DLVFITHPDQR	CG2238-PA,CG2238-PB,CG2238-PC	2b	gi|24585709,gi|24585711,gi|24585713	1	30
DLVTGESESVDINGK	CG15825-PA,CG15825-PB	2b	gi|24585183,gi|20129625	1	86
DLVTGESESVDINGKR	CG15825-PA,CG15825-PB	2b	gi|24585183,gi|20129625	1	86
DLYSPPSNTAILK	CG33950-PA,CG33950-PB,CG33950-PC,CG33950-PD,CG33950-PE,CG33950-PF,CG33950-PG	2b	gi|78706472,gi|78706470,gi|78706464,gi|78706466,gi|78706468,gi|78706474,gi|161077537	1	871
DMAGLLKPESAR	CG1516-PA,CG1516-PB,CG1516-PD,CG1516-PE,CG1516-PG,CG1516-PI,CG1516-PJ,CG1516-PK,CG1516-PL	2b	gi|24652210,gi|24652212,gi|24652214,gi|19921944,gi|24652216,gi|24652218,gi|24652220,gi|24652222,gi|24652224	1	469
DMTVIAGDEFR	CG32019-PA,CG32019-PC,CG32019-PD,CG32019-PE	2b	gi|28558739,gi|45552151,gi|45552153,gi|45552149	0	787
DNAIDKADTCENQAK	CG4843-PA,CG4843-PB,CG4843-PC	2b	gi|28571726,gi|24647095,gi|45551906	1	131
DNGGIDTEK	CG6692-PA,CG6692-PB,CG6692-PC	2b	gi|24653516,gi|24653518,gi|24653514	1	104
DNLVSVTEGHK	CG2139-PA,CG2139-PB,CG2139-PC,CG2139-PD	2b	gi|24651389,gi|45552009,gi|24651387,gi|24651391	1	61
DNPLENLNTAFDVAEK	CG4376-PA,CG4376-PB,CG4376-PC	2b	gi|24639238,gi|24639240,gi|17137758	1	241
DPEEAEKEEAAAK	CG14792-PA,CG14792-PB,CG14792-PD	2b	gi|17136518,gi|24639112,gi|45551198	1	30
DPEGGIYLGLCRPCECNGHSK	CG33950-PA,CG33950-PB,CG33950-PC,CG33950-PD,CG33950-PE,CG33950-PF,CG33950-PG	2b	gi|78706472,gi|78706470,gi|78706464,gi|78706466,gi|78706468,gi|78706474,gi|161077537	0	871
DPFDEPNKPGTPEVTDYDNQSISLK	CG32019-PA,CG32019-PC,CG32019-PD,CG32019-PE	2b	gi|28558739,gi|45552151,gi|45552153,gi|45552149	1	787
DPITSFK	CG7010-PA,CG7010-PB,CG7010-PC,CG7010-PD	2b	gi|28571106,gi|24639746,gi|24639740,gi|24639744	1	33
DPLNDTVVDQFK	CG17927-PA,CG17927-PB,CG17927-PC,CG17927-PD,CG17927-PE,CG17927-PF,CG17927-PG,CG17927-PH,CG17927-PI,CG17927-PJ,CG17927-PK,CG17927-PL,CG17927-PM	2b	gi|24584704,gi|24584710,gi|24584692,gi|24584702,gi|24584696,gi|24584700,gi|24584694,gi|28574239,gi|24584706,gi|24584698,gi|24584712,gi|24584714,gi|24584716	1	2330
DPYSHPDKPGQPQATDWGK	CG32019-PA,CG32019-PC,CG32019-PD,CG32019-PE	2b	gi|28558739,gi|45552151,gi|45552153,gi|45552149	1	787
DQPFTFQLGAGQVIK	CG9847-PA,CG9847-PB	2b	gi|17352457,gi|24657035	1	12
DQPGLVTWLK	CG33519-PB,CG33519-PC	2b	gi|161077453,gi|161077455	0	65
DQQILEPFPYSPATSR	CG33484-PA,CG33484-PB,CG33484-PC,CG33484-PD	2b	gi|45580802,gi|116007758,gi|116007760,gi|116007762	1	226
DQTLANELR	CG4376-PA,CG4376-PB,CG4376-PC	2b	gi|24639238,gi|24639240,gi|17137758	1	241
DQTLASLRPTLDYSDFK	CG4389-PA,CG4389-PB,CG4389-PC	2b	gi|19921000,gi|24583077,gi|24583079	1	210
DQVTSTFGR	CG33950-PA,CG33950-PB,CG33950-PC,CG33950-PD,CG33950-PE,CG33950-PF,CG33950-PG	2b	gi|78706472,gi|78706470,gi|78706464,gi|78706466,gi|78706468,gi|78706474,gi|161077537	1	871
DSLTCEVENGGSLGSR	CG7070-PA,CG7070-PB	2b	gi|28571814,gi|24648964	1	38
DSVIGEQCDTCK	CG33950-PA,CG33950-PB,CG33950-PC,CG33950-PD,CG33950-PE,CG33950-PF,CG33950-PG	2b	gi|78706472,gi|78706470,gi|78706464,gi|78706466,gi|78706468,gi|78706474,gi|161077537	1	871
DSVLDDAGLYR	CG32019-PA,CG32019-PC,CG32019-PD,CG32019-PE	2b	gi|28558739,gi|45552151,gi|45552153,gi|45552149	1	787
DSVPVVISLDGNQAVR	CG4001-PA,CG4001-PB,CG4001-PC	2b	gi|17647809,gi|24652337,gi|28573326	1	10
DTADTFVYPVLNEED	CG15009-PA,CG15009-PB,CG15009-PC	2b	gi|45549192,gi|24657376,gi|45551513	1	10
DTCQDYTGK	CG33103-PA,CG33103-PB	2b	gi|28572036,gi|28572038	0	438
DTDYDYYAQDDFR	CG7356-PA,CG7356-PB	2b	gi|24582657,gi|24582659	0	19
DTHGNDVSLEK	CG12013-PA,CG12013-PB,CG12013-PC,CG12013-PD	2b	gi|24656777,gi|21356883,gi|24656767,gi|24656772	1	55
DTIAQAVAVGLK	CG4389-PA,CG4389-PB,CG4389-PC	2b	gi|19921000,gi|24583077,gi|24583079	1	210
DTIEVASLDDPSLR	CG12908-PA,CG12908-PB	2b	gi|24652408,gi|45552547	0	41
DTINNVQQAVGK	CG6904-PA,CG6904-PB,CG6904-PC	2b	gi|45551893,gi|21357845,gi|24646982	1	27
DTLAIGHLISTK	CG7356-PA,CG7356-PB	2b	gi|24582657,gi|24582659	0	19
DTNGSQFFITTK	CG2852-PA,CG2852-PB	2b	gi|20130249,gi|24658306	1	39
DTPQEIYNQAK	CG9057-PA,CG9057-PB,CG9057-PC	2b	gi|18859967,gi|116007162,gi|116007164	1	9
DTQGVFNATAFNK	CG9331-PA,CG9331-PB,CG9331-PC,CG9331-PD,CG9331-PE	2b	gi|45551003,gi|24585514,gi|28574284,gi|28574282,gi|45552429	1	11
DTTLFGYFSDSDSK	CG8983-PA,CG8983-PB	2b	gi|45551086,gi|19922048	1	72
DTVSITITK	CG33950-PA,CG33950-PB,CG33950-PC,CG33950-PD,CG33950-PE,CG33950-PF,CG33950-PG	2b	gi|78706472,gi|78706470,gi|78706464,gi|78706466,gi|78706468,gi|78706474,gi|161077537	0	871
DVDNIISAYR	CG7010-PA,CG7010-PB,CG7010-PC,CG7010-PD	2b	gi|28571106,gi|24639746,gi|24639740,gi|24639744	1	33
DVSSDQLDEILR	CG5670-PA,CG5670-PB,CG5670-PC,CG5670-PD,CG5670-PE,CG5670-PF,CG5670-PG,CG5670-PH	2b	gi|24648576,gi|24648578,gi|24648580,gi|24648582,gi|45553441,gi|45553439,gi|45553437,gi|45553435	1	209
DVSVTEGMPAQFK	CG1915-PA,CG1915-PC	2b	gi|24655827,gi|161080703	1	363
DVVIANSGTLPVSEAFSVAK	CG2852-PA,CG2852-PB	2b	gi|20130249,gi|24658306	1	39
DVYDDVQYLASLGK	CG32593-PA,CG32593-PB,CG32593-PC,CG32593-PD,CG32593-PE,CG32593-PF	2b	gi|24642027,gi|24642031,gi|24642061,gi|24642065,gi|24642029,gi|24642033	1	32
DYQETFEFINTLAK	CG7176-PA,CG7176-PB,CG7176-PC,CG7176-PD,CG7176-PE,CG7176-PF,CG7176-PG	2b	gi|24660860,gi|24660849,gi|21356561,gi|24660856,gi|24660864,gi|24660868,gi|28574947	1	35
DYTLQCAASGKPSPTAR	CG32019-PA,CG32019-PC,CG32019-PD,CG32019-PE	2b	gi|28558739,gi|45552151,gi|45552153,gi|45552149	1	787
EAAMVEMLLDTLPK	CG8200-PA,CG8200-PB	2b	gi|17137546,gi|24653894	1	28
EAAVVDPVEPELVIK	CG4365-PA,CG4365-PB,CG4365-PC	2b	gi|21356335,gi|24667711,gi|24667703	1	3
EAFNNAYMELGGLGER	CG5670-PA,CG5670-PB,CG5670-PC,CG5670-PD,CG5670-PE,CG5670-PF,CG5670-PG,CG5670-PH	2b	gi|24648576,gi|24648578,gi|24648580,gi|24648582,gi|45553441,gi|45553439,gi|45553437,gi|45553435	1	209
EAGNNPSEEQLK	CG3861-PA,CG3861-PB	2b	gi|24640126,gi|24640124	1	71
EAIAEEQR	CG8200-PA,CG8200-PB	2b	gi|17137546,gi|24653894	0	28
EAIDGTYIDK	CG8857-PA,CG8857-PB,CG8857-PC	2b	gi|20129901,gi|24652924,gi|24652922	1	5
EALNLISDAIAK	CG17654-PA,CG17654-PB,CG17654-PC,CG17654-PD,CG17654-PE	2b	gi|17137654,gi|24580914,gi|24580916,gi|24580918,gi|24580920	1	12
EANLLLGDIIK	CG1516-PA,CG1516-PB,CG1516-PD,CG1516-PE,CG1516-PG,CG1516-PI,CG1516-PJ,CG1516-PK,CG1516-PL	2b	gi|24652210,gi|24652212,gi|24652214,gi|19921944,gi|24652216,gi|24652218,gi|24652220,gi|24652222,gi|24652224	1	469
EANLLLGDIIKVTPSSK	CG1516-PA,CG1516-PB,CG1516-PD,CG1516-PE,CG1516-PG,CG1516-PI,CG1516-PJ,CG1516-PK,CG1516-PL	2b	gi|24652210,gi|24652212,gi|24652214,gi|19921944,gi|24652216,gi|24652218,gi|24652220,gi|24652222,gi|24652224	0	469
EANQEINPALENLAR	CG10279-PA,CG10279-PB,CG10279-PC,CG10279-PD,CG10279-PE,CG10279-PF	2b	gi|24644479,gi|45551833,gi|24644485,gi|24644481,gi|24644483,gi|24644487	1	3
EAPPNEKPEIVK	CG8332-PA,CG8332-PB	2b	gi|19922390,gi|24654191	1	6
EAPVSQKPAPVYTSQPAAVSYQGGSK	CG33205-PA,CG33205-PB,CG33205-PC,CG33205-PE,CG33205-PF,CG33205-PG,CG33205-PH,CG33205-PI	2b	gi|45552088,gi|45552080,gi|45552082,gi|45552090,gi|45552084,gi|45552086,gi|85725114,gi|85725116	1	1
EASDIILTDDNFSSIVK	CG2165-PA,CG2165-PB,CG2165-PC,CG2165-PD,CG2165-PE	2b	gi|62484399,gi|62484401,gi|62473120,gi|62473111,gi|62473099	1	35
EASFEYLQNEGER	CG11198-PA,CG11198-PB,CG11198-PC,CG11198-PD	2b	gi|24586458,gi|24586460,gi|161076407,gi|161076409	1	52
EATLNAAALDEEK	CG7675-PA,CG7675-PB,CG7675-PC	2b	gi|24647948,gi|24647946,gi|45553409	0	8
EDPQETGEPAGNTATTTAPAGDDAVR	CG4035-PA,CG4035-PB,CG4035-PC,CG4035-PD,CG4035-PE,CG4035-PF,CG4035-PG	2b	gi|24661546,gi|17864468,gi|24661542,gi|24661553,gi|24661557,gi|24661561,gi|24661565	1	21
EEALEFCK	CG1516-PA,CG1516-PB,CG1516-PD,CG1516-PE,CG1516-PG,CG1516-PI,CG1516-PJ,CG1516-PK,CG1516-PL	2b	gi|24652210,gi|24652212,gi|24652214,gi|19921944,gi|24652216,gi|24652218,gi|24652220,gi|24652222,gi|24652224	0	469
EEEETYITQAPR	CG1915-PA,CG1915-PC	2b	gi|24655827,gi|161080703	1	363
EEEFENTR	CG17927-PA,CG17927-PB,CG17927-PC,CG17927-PD,CG17927-PE,CG17927-PF,CG17927-PG,CG17927-PH,CG17927-PI,CG17927-PJ,CG17927-PK,CG17927-PL,CG17927-PM	2b	gi|24584704,gi|24584710,gi|24584692,gi|24584702,gi|24584696,gi|24584700,gi|24584694,gi|28574239,gi|24584706,gi|24584698,gi|24584712,gi|24584714,gi|24584716	1	2330
EELVTEDEQPNPPK	CG1915-PA,CG1915-PC	2b	gi|24655827,gi|161080703	1	363
EEQAEQDGEEEGGR	CG17927-PA,CG17927-PB,CG17927-PC,CG17927-PD,CG17927-PE,CG17927-PF,CG17927-PG,CG17927-PH,CG17927-PI,CG17927-PJ,CG17927-PK,CG17927-PL,CG17927-PM	2b	gi|24584704,gi|24584710,gi|24584692,gi|24584702,gi|24584696,gi|24584700,gi|24584694,gi|28574239,gi|24584706,gi|24584698,gi|24584712,gi|24584714,gi|24584716	1	2330
EETLIHIGNR	CG11661-PA,CG11661-PB,CG11661-PC,CG11661-PE,CG11661-PF,CG11661-PG,CG11661-PH,CG11661-PI	2b	gi|24665669,gi|24665673,gi|24665677,gi|28574585,gi|28574590,gi|28574592,gi|161084450,gi|161084461	1	218
EEVSEYLK	CG9847-PA,CG9847-PB	2b	gi|17352457,gi|24657035	1	12
EEVVFLNVQPLPK	CG32019-PA,CG32019-PC,CG32019-PD,CG32019-PE	2b	gi|28558739,gi|45552151,gi|45552153,gi|45552149	1	787
EEYSTNALIGNYK	CG5044-PA,CG5044-PB	2b	gi|28571729,gi|28571730	1	2
EFDDLSPTEQK	CG3725-PA,CG3725-PB,CG3725-PC,CG3725-PD,CG3725-PE,CG3725-PF,CG3725-PG,CG3725-PH	2b	gi|17136664,gi|24762445,gi|24762447,gi|24762449,gi|24762451,gi|24762453,gi|24762455,gi|24762457	1	581
EFTGLGNCLTK	CG16944-PA,CG16944-PB,CG16944-PC,CG16944-PD	2b	gi|18079273,gi|24641095,gi|24641090,gi|24641092	1	349
EFTLEEEEK	CG7178-PA,CG7178-PB,CG7178-PC,CG7178-PD,CG7178-PE,CG7178-PF,CG7178-PG	2b	gi|24642961,gi|24642959,gi|17737363,gi|24642955,gi|24642957,gi|24642953,gi|24642963	0	39
EFTLEEEEKEK	CG7178-PA,CG7178-PB,CG7178-PC,CG7178-PD,CG7178-PE,CG7178-PF,CG7178-PG	2b	gi|24642961,gi|24642959,gi|17737363,gi|24642955,gi|24642957,gi|24642953,gi|24642963	1	39
EFTLEFSR	CG3725-PA,CG3725-PB,CG3725-PC,CG3725-PD,CG3725-PE,CG3725-PF,CG3725-PG,CG3725-PH	2b	gi|17136664,gi|24762445,gi|24762447,gi|24762449,gi|24762451,gi|24762453,gi|24762455,gi|24762457	1	581
EGAGDGEGAEGDEAEGEEAKEGEEAADETK	CG6143-PA,CG6143-PB,CG6143-PC	2b	gi|45551590,gi|17864514,gi|45553181	1	3
EGENIQLQCTVTDQYGVR	CG33950-PA,CG33950-PB,CG33950-PC,CG33950-PD,CG33950-PE,CG33950-PF,CG33950-PG	2b	gi|78706472,gi|78706470,gi|78706464,gi|78706466,gi|78706468,gi|78706474,gi|161077537	1	871
EGESEDLETEKPIIAK	CG32019-PA,CG32019-PC,CG32019-PD,CG32019-PE	2b	gi|28558739,gi|45552151,gi|45552153,gi|45552149	1	787
EGESEPLETFDAIVAR	CG32019-PA,CG32019-PC,CG32019-PD,CG32019-PE	2b	gi|28558739,gi|45552151,gi|45552153,gi|45552149	1	787
EGESEPLETLGSIIAK	CG32019-PA,CG32019-PC,CG32019-PD,CG32019-PE	2b	gi|28558739,gi|45552151,gi|45552153,gi|45552149	1	787
EGILADENLR	CG2238-PA,CG2238-PB,CG2238-PC	2b	gi|24585709,gi|24585711,gi|24585713	1	30
EGLLDPAWEK	CG4376-PA,CG4376-PB,CG4376-PC	2b	gi|24639238,gi|24639240,gi|17137758	0	241
EGLLLWCQR	CG4376-PA,CG4376-PB,CG4376-PC	2b	gi|24639238,gi|24639240,gi|17137758	0	241
EGLVFLGPPER	CG11198-PA,CG11198-PB,CG11198-PC,CG11198-PD	2b	gi|24586458,gi|24586460,gi|161076407,gi|161076409	1	52
EGNVSSALVTTNER	CG3164-PA,CG3164-PB,CG3164-PC,CG3164-PD	2b	gi|24580553,gi|24580555,gi|85816269,gi|85724864	1	3
EGVIPGNALVVDPK	CG6148-PA,CG6148-PB	2b	gi|24646379,gi|24646381	1	16
EGYLLGEIK	CG17927-PA,CG17927-PB,CG17927-PC,CG17927-PD,CG17927-PE,CG17927-PF,CG17927-PG,CG17927-PH,CG17927-PI,CG17927-PJ,CG17927-PK,CG17927-PL,CG17927-PM	2b	gi|24584704,gi|24584710,gi|24584692,gi|24584702,gi|24584696,gi|24584700,gi|24584694,gi|28574239,gi|24584706,gi|24584698,gi|24584712,gi|24584714,gi|24584716	1	2330
EHSISPGDFPDIK	CG6148-PA,CG6148-PB	2b	gi|24646379,gi|24646381	1	16
EIQGDLEITR	CG1915-PA,CG1915-PC	2b	gi|24655827,gi|161080703	0	363
EIVPGDLVEVSVGDK	CG3725-PA,CG3725-PB,CG3725-PC,CG3725-PD,CG3725-PE,CG3725-PF,CG3725-PG,CG3725-PH	2b	gi|17136664,gi|24762445,gi|24762447,gi|24762449,gi|24762451,gi|24762453,gi|24762455,gi|24762457	1	581
EIVPGDLVEVSVGDKIPADIR	CG3725-PA,CG3725-PB,CG3725-PC,CG3725-PD,CG3725-PE,CG3725-PF,CG3725-PG,CG3725-PH	2b	gi|17136664,gi|24762445,gi|24762447,gi|24762449,gi|24762451,gi|24762453,gi|24762455,gi|24762457	1	581
ELAEYCTDEKEK	CG11567-PA,CG11567-PB	2b	gi|17137192,gi|24582192	1	177
ELEALNAK	CG17927-PA,CG17927-PB,CG17927-PC,CG17927-PD,CG17927-PE,CG17927-PF,CG17927-PG,CG17927-PH,CG17927-PI,CG17927-PJ,CG17927-PK,CG17927-PL,CG17927-PM	2b	gi|24584704,gi|24584710,gi|24584692,gi|24584702,gi|24584696,gi|24584700,gi|24584694,gi|28574239,gi|24584706,gi|24584698,gi|24584712,gi|24584714,gi|24584716	0	2330
ELEAVVPEHCVIATNTSAIPITK	CG4389-PA,CG4389-PB,CG4389-PC	2b	gi|19921000,gi|24583077,gi|24583079	1	210
ELECPQGQQADTSAPLVAEPPK	CG1915-PA,CG1915-PC	2b	gi|24655827,gi|161080703	1	363
ELEELGER	CG17927-PA,CG17927-PB,CG17927-PC,CG17927-PD,CG17927-PE,CG17927-PF,CG17927-PG,CG17927-PH,CG17927-PI,CG17927-PJ,CG17927-PK,CG17927-PL,CG17927-PM	2b	gi|24584704,gi|24584710,gi|24584692,gi|24584702,gi|24584696,gi|24584700,gi|24584694,gi|28574239,gi|24584706,gi|24584698,gi|24584712,gi|24584714,gi|24584716	0	2330
ELENELDGEQR	CG17927-PA,CG17927-PB,CG17927-PC,CG17927-PD,CG17927-PE,CG17927-PF,CG17927-PG,CG17927-PH,CG17927-PI,CG17927-PJ,CG17927-PK,CG17927-PL,CG17927-PM	2b	gi|24584704,gi|24584710,gi|24584692,gi|24584702,gi|24584696,gi|24584700,gi|24584694,gi|28574239,gi|24584706,gi|24584698,gi|24584712,gi|24584714,gi|24584716	1	2330
ELEQTIQR	CG17927-PA,CG17927-PB,CG17927-PC,CG17927-PD,CG17927-PE,CG17927-PF,CG17927-PG,CG17927-PH,CG17927-PI,CG17927-PJ,CG17927-PK,CG17927-PL,CG17927-PM	2b	gi|24584704,gi|24584710,gi|24584692,gi|24584702,gi|24584696,gi|24584700,gi|24584694,gi|28574239,gi|24584706,gi|24584698,gi|24584712,gi|24584714,gi|24584716	1	2330
ELEVLLMQNR	CG7939-PA,CG7939-PB,CG7939-PC	2b	gi|17864106,gi|24651276,gi|24651273	1	5
ELGLADGYR	CG2862-PA,CG2862-PB	2b	gi|28574010,gi|24581222	1	4
ELGLFGLYK	CG2139-PA,CG2139-PB,CG2139-PC,CG2139-PD	2b	gi|24651389,gi|45552009,gi|24651387,gi|24651391	1	61
ELLLMDTTFR	CG1516-PA,CG1516-PB,CG1516-PD,CG1516-PE,CG1516-PG,CG1516-PI,CG1516-PJ,CG1516-PK,CG1516-PL	2b	gi|24652210,gi|24652212,gi|24652214,gi|19921944,gi|24652216,gi|24652218,gi|24652220,gi|24652222,gi|24652224	1	469
ELLTLDEK	CG3395-PA,CG3395-PB,CG3395-PD	2b	gi|24661707,gi|24661715,gi|24661711	1	34
ELNALLNDAIST	CG11661-PA,CG11661-PB,CG11661-PC,CG11661-PE,CG11661-PF,CG11661-PG,CG11661-PH,CG11661-PI	2b	gi|24665669,gi|24665673,gi|24665677,gi|28574585,gi|28574590,gi|28574592,gi|161084450,gi|161084461	1	218
ELPDCEETREDLCHIDPSK	CG8779-PA,CG8779-PB	2b	gi|78707507,gi|116007846	0	10
ELPPDQAEYCIQR	CG4376-PA,CG4376-PB,CG4376-PC	2b	gi|24639238,gi|24639240,gi|17137758	1	241
ELQESHTCVTNR	CG1516-PA,CG1516-PB,CG1516-PD,CG1516-PE,CG1516-PG,CG1516-PI,CG1516-PJ,CG1516-PK,CG1516-PL	2b	gi|24652210,gi|24652212,gi|24652214,gi|19921944,gi|24652216,gi|24652218,gi|24652220,gi|24652222,gi|24652224	1	469
ELSFQSEEDR	CG17927-PA,CG17927-PB,CG17927-PC,CG17927-PD,CG17927-PE,CG17927-PF,CG17927-PG,CG17927-PH,CG17927-PI,CG17927-PJ,CG17927-PK,CG17927-PL,CG17927-PM	2b	gi|24584704,gi|24584710,gi|24584692,gi|24584702,gi|24584696,gi|24584700,gi|24584694,gi|28574239,gi|24584706,gi|24584698,gi|24584712,gi|24584714,gi|24584716	1	2330
ELSFQSEEDRK	CG17927-PA,CG17927-PB,CG17927-PC,CG17927-PD,CG17927-PE,CG17927-PF,CG17927-PG,CG17927-PH,CG17927-PI,CG17927-PJ,CG17927-PK,CG17927-PL,CG17927-PM	2b	gi|24584704,gi|24584710,gi|24584692,gi|24584702,gi|24584696,gi|24584700,gi|24584694,gi|28574239,gi|24584706,gi|24584698,gi|24584712,gi|24584714,gi|24584716	1	2330
ELVLMPLPR	CG33950-PA,CG33950-PB,CG33950-PC,CG33950-PD,CG33950-PE,CG33950-PF,CG33950-PG	2b	gi|78706472,gi|78706470,gi|78706464,gi|78706466,gi|78706468,gi|78706474,gi|161077537	1	871
EMLMNFGDK	CG2184-PA,CG2184-PB	2b	gi|17933672,gi|45552007	1	196
EMNDAGQFYTNR	CG33979-PA,CG33979-PB	2b	gi|85724872,gi|85724874	1	6
EMYDGITELIK	CG32031-PA,CG32031-PB,CG32031-PC,CG32031-PD,CG32031-PE,CG32031-PF	2b	gi|24661336,gi|24661340,gi|24661344,gi|24661348,gi|161082598,gi|161082600	1	143
ENCEIVQVQSVPINR	CG9331-PA,CG9331-PB,CG9331-PC,CG9331-PD,CG9331-PE	2b	gi|45551003,gi|24585514,gi|28574284,gi|28574282,gi|45552429	0	11
ENDVDAVHPGYGFLSER	CG1516-PA,CG1516-PB,CG1516-PD,CG1516-PE,CG1516-PG,CG1516-PI,CG1516-PJ,CG1516-PK,CG1516-PL	2b	gi|24652210,gi|24652212,gi|24652214,gi|19921944,gi|24652216,gi|24652218,gi|24652220,gi|24652222,gi|24652224	1	469
ENDVGAYTCVATNEIGVTK	CG33519-PB,CG33519-PC	2b	gi|161077453,gi|161077455	1	65
ENIAAGQNELLK	CG6058-PA,CG6058-PB,CG6058-PC,CG6058-PD,CG6058-PE,CG6058-PF,CG6058-PG,CG6058-PH	2b	gi|45551983,gi|24650278,gi|24650280,gi|24650282,gi|24650288,gi|24650276,gi|45551985,gi|45553577	1	57
ENPSFLDLISDPDLK	CG9364-PA,CG9364-PB,CG9364-PC,CG9364-PD,CG9364-PE,CG9364-PF	2b	gi|24656661,gi|24656685,gi|24656675,gi|17933716,gi|24656670,gi|24656680	1	1
ENQCGIASASSYPLV	CG6692-PA,CG6692-PB,CG6692-PC	2b	gi|24653516,gi|24653518,gi|24653514	0	104
ENTLNQLAGAAFGAAGQR	CG17896-PA,CG17896-PB	2b	gi|24638878,gi|24638876	1	16
ENVNQSAPSAQPVLIVEVENVK	CG8798-PA,CG8798-PB	2b	gi|24666867,gi|24666871	1	6
ENYDDEPDETASER	CG14981-PA,CG14981-PB	2b	gi|17647639,gi|24657033	1	16
EPGLGDWLK	CG7070-PA,CG7070-PB	2b	gi|28571814,gi|24648964	1	38
EPPIVKPEEAVACVK	CG7920-PA,CG7920-PB	2b	gi|21358615,gi|24651253	1	100
EPQEICEVK	CG1910-PA,CG1910-PB,CG1910-PC,CG1910-PD	2b	gi|21356979,gi|24651733,gi|24651731,gi|24651735	0	3
EPSEQVEHCR	CG10120-PA,CG10120-PB	2b	gi|24646388,gi|24646386	0	7
EQEIYCAGCYEEK	CG32171-PA,CG32171-PB,CG32171-PC,CG32171-PD,CG32171-PE,CG32171-PF,CG32171-PG,CG32171-PH	2b	gi|45550635,gi|21356031,gi|24665618,gi|24665611,gi|45553169,gi|45553167,gi|45553165,gi|45553163	1	62
EQELAALNQELSSLNDK	CG18212-PA,CG18212-PB,CG18212-PD,CG18212-PE,CG18212-PF,CG18212-PG	2b	gi|24647739,gi|45553397,gi|24647741,gi|24647743,gi|24647745,gi|21358555	1	4
EQIQDVEDQDVS	CG31196-PA,CG31196-PB,CG31196-PC,CG31196-PD	2b	gi|24647885,gi|24647887,gi|24647891,gi|24647889	1	30
EQLGISER	CG17927-PA,CG17927-PB,CG17927-PC,CG17927-PD,CG17927-PE,CG17927-PF,CG17927-PG,CG17927-PH,CG17927-PI,CG17927-PJ,CG17927-PK,CG17927-PL,CG17927-PM	2b	gi|24584704,gi|24584710,gi|24584692,gi|24584702,gi|24584696,gi|24584700,gi|24584694,gi|28574239,gi|24584706,gi|24584698,gi|24584712,gi|24584714,gi|24584716	1	2330
EQLNSLMTTLR	CG17927-PA,CG17927-PB,CG17927-PC,CG17927-PD,CG17927-PE,CG17927-PF,CG17927-PG,CG17927-PH,CG17927-PI,CG17927-PJ,CG17927-PK,CG17927-PL,CG17927-PM	2b	gi|24584704,gi|24584710,gi|24584692,gi|24584702,gi|24584696,gi|24584700,gi|24584694,gi|28574239,gi|24584706,gi|24584698,gi|24584712,gi|24584714,gi|24584716	1	2330
EQVEEEAEGK	CG17927-PA,CG17927-PB,CG17927-PC,CG17927-PD,CG17927-PE,CG17927-PF,CG17927-PG,CG17927-PH,CG17927-PI,CG17927-PJ,CG17927-PK,CG17927-PL,CG17927-PM	2b	gi|24584704,gi|24584710,gi|24584692,gi|24584702,gi|24584696,gi|24584700,gi|24584694,gi|28574239,gi|24584706,gi|24584698,gi|24584712,gi|24584714,gi|24584716	1	2330
EQVVAPQFVQR	CG1915-PA,CG1915-PC	2b	gi|24655827,gi|161080703	0	363
ERTEPLDAGSTPSSPPTKPVTAQSS	CG6512-PA,CG6512-PB	2b	gi|28574878,gi|24665814	1	3
ESAWQR	CG33950-PA,CG33950-PB,CG33950-PC,CG33950-PD,CG33950-PE,CG33950-PF,CG33950-PG	2b	gi|78706472,gi|78706470,gi|78706464,gi|78706466,gi|78706468,gi|78706474,gi|161077537	0	871
ESPLDADLVSSVPESGTAAAHGYAR	CG10078-PA,CG10078-PB	2b	gi|24659604,gi|24659598	1	5
ESQASSKRLSAESPISEEDPVAATK	CG6643-PA,CG6643-PB	2b	gi|24649705,gi|45552026	0	10
ESSILAVLK	CG4260-PA,CG4260-PB	2b	gi|28574818,gi|45552169	0	35
ESSVELQDSAGHEVPEPK	CG32019-PA,CG32019-PC,CG32019-PD,CG32019-PE	2b	gi|28558739,gi|45552151,gi|45552153,gi|45552149	1	787
ESTDTDTAEQVIDSFR	CG4376-PA,CG4376-PB,CG4376-PC	2b	gi|24639238,gi|24639240,gi|17137758	1	241
ETELTSTGQVR	CG32019-PA,CG32019-PC,CG32019-PD,CG32019-PE	2b	gi|28558739,gi|45552151,gi|45552153,gi|45552149	1	787
ETKPESEQDCEGEEK	CG33103-PA,CG33103-PB	2b	gi|28572036,gi|28572038	0	438
ETLGIMQHHDAITGTEK	CG6206-PA,CG6206-PB	2b	gi|19921088,gi|24583443	0	68
ETPYLALPADYMGNQLK	CG33950-PA,CG33950-PB,CG33950-PC,CG33950-PD,CG33950-PE,CG33950-PF,CG33950-PG	2b	gi|78706472,gi|78706470,gi|78706464,gi|78706466,gi|78706468,gi|78706474,gi|161077537	1	871
ETQPDDVDTDNQFR	CG15881-PA,CG15881-PB	2b	gi|45551638,gi|21357363	1	8
ETTLDGNAWLDESR	CG6206-PA,CG6206-PB	2b	gi|19921088,gi|24583443	0	68
ETVSEESDQMCLSK	CG2238-PA,CG2238-PB,CG2238-PC	2b	gi|24585709,gi|24585711,gi|24585713	1	30
EVALQVTEPVSQPAYIYGDK	CG33103-PA,CG33103-PB	2b	gi|28572036,gi|28572038	0	438
EVDDAYDQMVIDDK	CG2184-PA,CG2184-PB	2b	gi|17933672,gi|45552007	1	196
EVDLINIALDSAGTADK	CG33950-PA,CG33950-PB,CG33950-PC,CG33950-PD,CG33950-PE,CG33950-PF,CG33950-PG	2b	gi|78706472,gi|78706470,gi|78706464,gi|78706466,gi|78706468,gi|78706474,gi|161077537	1	871
EVEPGEIIELSR	CG10078-PA,CG10078-PB	2b	gi|24659604,gi|24659598	1	5
EVFDSIVR	CG3725-PA,CG3725-PB,CG3725-PC,CG3725-PD,CG3725-PE,CG3725-PF,CG3725-PG,CG3725-PH	2b	gi|17136664,gi|24762445,gi|24762447,gi|24762449,gi|24762451,gi|24762453,gi|24762455,gi|24762457	1	581
EVGKDSLTCEVENGGSLGSR	CG7070-PA,CG7070-PB	2b	gi|28571814,gi|24648964	1	38
EVLVCEGPEAFAK	CG1516-PA,CG1516-PB,CG1516-PD,CG1516-PE,CG1516-PG,CG1516-PI,CG1516-PJ,CG1516-PK,CG1516-PL	2b	gi|24652210,gi|24652212,gi|24652214,gi|19921944,gi|24652216,gi|24652218,gi|24652220,gi|24652222,gi|24652224	1	469
EVLVQCEEDQK	CG5939-PA,CG5939-PB,CG5939-PC,CG5939-PD	2b	gi|24661112,gi|24661116,gi|24661120,gi|24661124	1	578
EVSASLR	CG2171-PA,CG2171-PB,CG2171-PC	2b	gi|28572004,gi|28572006,gi|28572008	0	22
EVSGDASEAALLK	CG5670-PA,CG5670-PB,CG5670-PC,CG5670-PD,CG5670-PE,CG5670-PF,CG5670-PG,CG5670-PH	2b	gi|24648576,gi|24648578,gi|24648580,gi|24648582,gi|45553441,gi|45553439,gi|45553437,gi|45553435	1	209
EVTDDVNQGLK	CG5174-PA,CG5174-PB,CG5174-PG,CG5174-PH,CG5174-PI,CG5174-PJ,CG5174-PK	2b	gi|24655026,gi|24655036,gi|24655020,gi|24655029,gi|24655022,gi|24655017,gi|24655032	1	15
EVVAVTGDGTNDGPALK	CG2165-PA,CG2165-PB,CG2165-PC,CG2165-PD,CG2165-PE	2b	gi|62484399,gi|62484401,gi|62473120,gi|62473111,gi|62473099	1	35
EVVEAEITSNEK	CG4019-PA,CG4019-PB,CG4019-PC,CG4019-PD	2b	gi|20130305,gi|24762346,gi|24762344,gi|24762348	1	20
EVYDFLASTCAK	CG9244-PB,CG9244-PC	2b	gi|17864292,gi|161076999	1	473
EYANDIGFK	CG8495-PA,CG8495-PC	2b	gi|24645515,gi|24645517	1	5
EYATIIGIPEFYNK	CG4233-PA,CG4233-PB,CG4233-PC	2b	gi|24580970,gi|24580972,gi|19920542	1	88
EYVNPLNLASGSR	CG1771-PA,CG1771-PB	2b	gi|24641711,gi|24641709	0	3
FAANCVPIEK	CG3359-PB,CG3359-PC,CG3359-PD,CG3359-PE,CG3359-PF,CG3359-PG,CG3359-PH,CG3359-PI,CG3359-PJ,CG3359-PK,CG3359-PL,CG3359-PM,CG3359-PN,CG3359-PO,CG3359-PP	2b	gi|24646161,gi|24646163,gi|28573039,gi|28573041,gi|28573043,gi|28573045,gi|28573047,gi|28573049,gi|28573051,gi|28573053,gi|28573061,gi|28573055,gi|28573057,gi|28573059,gi|28573037	0	29
FADLFGR	CG4347-PA,CG4347-PC	2b	gi|62484278,gi|62484452	1	69
FAHEITHFSDSVLANK	CG15102-PA,CG15102-PB	2b	gi|24655327,gi|45552070	1	8
FAHLGAVGSDIDAVK	CG18076-PA,CG18076-PB,CG18076-PC,CG18076-PE,CG18076-PG,CG18076-PH	2b	gi|24653493,gi|24653489,gi|24653495,gi|24653491,gi|24653487,gi|24653497	1	5
FAIQDISVEEMTAK	CG4376-PA,CG4376-PB,CG4376-PC	2b	gi|24639238,gi|24639240,gi|17137758	1	241
FCSEYGECVER	CG7334-PA,CG7334-PB	2b	gi|24662825,gi|45553059	1	1
FDDPNVER	CG1742-PA,CG1742-PB	2b	gi|24643618,gi|24643616	1	34
FDPDTGIWLPVGR	CG32019-PA,CG32019-PC,CG32019-PD,CG32019-PE	2b	gi|28558739,gi|45552151,gi|45552153,gi|45552149	1	787
FDQPAPAGTTYK	CG1803-PA,CG1803-PB,CG1803-PC,CG1803-PD	2b	gi|24641469,gi|24641471,gi|18860103,gi|45551448	1	5
FDVSQYAPEEIVVK	CG14207-PA,CG14207-PB	2b	gi|19920346,gi|24643312	1	22
FDYIFYTGSTR	CG11140-PA,CG11140-PB,CG11140-PC,CG11140-PD,CG11140-PE,CG11140-PF,CG11140-PG,CG11140-PH,CG11140-PI	2b	gi|24586252,gi|24586254,gi|24586256,gi|24586258,gi|45552499,gi|45551030,gi|45551031,gi|45550376,gi|24586250	1	23
FECQLAPVGDPNMK	CG1915-PA,CG1915-PC	2b	gi|24655827,gi|161080703	0	363
FEDENFK	CG2852-PA,CG2852-PB	2b	gi|20130249,gi|24658306	1	39
FEEPLEHAVVINTR	CG10097-PA,CG10097-PB	2b	gi|24646271,gi|78706758	1	80
FEGSSESDLSTFVK	CG8983-PA,CG8983-PB	2b	gi|45551086,gi|19922048	1	72
FEHIMENGEDASYSQPVQFNVK	CG6206-PA,CG6206-PB	2b	gi|19921088,gi|24583443	1	68
FETENDCQQR	CG33103-PA,CG33103-PB	2b	gi|28572036,gi|28572038	0	438
FEVEFEGEPNPTVK	CG1915-PA,CG1915-PC	2b	gi|24655827,gi|161080703	1	363
FGAIGSSYEECR	CG7415-PB,CG7415-PC	2b	gi|24645049,gi|24645047	1	4
FGAYIVDGLR	CG11198-PA,CG11198-PB,CG11198-PC,CG11198-PD	2b	gi|24586458,gi|24586460,gi|161076407,gi|161076409	0	52
FGCCPDGVTK	CG33103-PA,CG33103-PB	2b	gi|28572036,gi|28572038	0	438
FGCCPDSQTPAHGPNK	CG33103-PA,CG33103-PB	2b	gi|28572036,gi|28572038	1	438
FGGCENVQEPPQK	CG33103-PA,CG33103-PB	2b	gi|28572036,gi|28572038	0	438
FGGGSGGGSSFSSSSSSGGGGGSGGGYK	CG17549-PA,CG17549-PB,CG17549-PC	2b	gi|28574364,gi|24585186,gi|24585188	0	17
FGIPQAAIDSVNTNK	CG12233-PA,CG12233-PB	2b	gi|24643268,gi|24643270	1	132
FGLDATAVGDEGGFAPNIQSNK	CG17654-PA,CG17654-PB,CG17654-PC,CG17654-PD,CG17654-PE	2b	gi|17137654,gi|24580914,gi|24580916,gi|24580918,gi|24580920	1	12
FGLYLPR	CG2139-PA,CG2139-PB,CG2139-PC,CG2139-PD	2b	gi|24651389,gi|45552009,gi|24651387,gi|24651391	1	61
FGQGLEER	CG9297-PA,CG9297-PB	2b	gi|28571703,gi|28571705	1	40
FGVSDPSPYTQTYR	CG33519-PB,CG33519-PC	2b	gi|161077453,gi|161077455	1	65
FIAATQQQQQK	CG33484-PA,CG33484-PB,CG33484-PC,CG33484-PD	2b	gi|45580802,gi|116007758,gi|116007760,gi|116007762	0	226
FIDLPEWPK	CG1112-PA,CG1112-PB	2b	gi|17737817,gi|24644842	0	17
FIDQYVPNSSGK	CG33129-PA,CG33129-PB,CG33129-PC,CG33129-PE	2b	gi|28574518,gi|28574520,gi|28574522,gi|28574516	1	15
FIEPTILVDVK	CG11140-PA,CG11140-PB,CG11140-PC,CG11140-PD,CG11140-PE,CG11140-PF,CG11140-PG,CG11140-PH,CG11140-PI	2b	gi|24586252,gi|24586254,gi|24586256,gi|24586258,gi|45552499,gi|45551030,gi|45551031,gi|45550376,gi|24586250	1	23
FIGPSPEVVQK	CG1516-PA,CG1516-PB,CG1516-PD,CG1516-PE,CG1516-PG,CG1516-PI,CG1516-PJ,CG1516-PK,CG1516-PL	2b	gi|24652210,gi|24652212,gi|24652214,gi|19921944,gi|24652216,gi|24652218,gi|24652220,gi|24652222,gi|24652224	1	469
FILDIVQNIR	CG17285-PA,CG17285-PB	2b	gi|24664081,gi|24664085	0	257
FINEAVLCLEEK	CG4389-PA,CG4389-PB,CG4389-PC	2b	gi|19921000,gi|24583077,gi|24583079	1	210
FINLFPEIR	CG4260-PA,CG4260-PB	2b	gi|28574818,gi|45552169	1	35
FIQEEGPALDWNK	CG4347-PA,CG4347-PC	2b	gi|62484278,gi|62484452	1	69
FISFEDR	CG32171-PA,CG32171-PB,CG32171-PC,CG32171-PD,CG32171-PE,CG32171-PF,CG32171-PG,CG32171-PH	2b	gi|45550635,gi|21356031,gi|24665618,gi|24665611,gi|45553169,gi|45553167,gi|45553165,gi|45553163	1	62
FITQIVDVTK	CG1915-PA,CG1915-PC	2b	gi|24655827,gi|161080703	1	363
FLAPFFDK	CG32019-PA,CG32019-PC,CG32019-PD,CG32019-PE	2b	gi|28558739,gi|45552151,gi|45552153,gi|45552149	1	787
FLNDTDIAK	CG8200-PA,CG8200-PB	2b	gi|17137546,gi|24653894	1	28
FLPSLLAVETMR	CG1827-PA,CG1827-PB	2b	gi|28573318,gi|24652135	0	2
FLSAQGDQLGAVGSR	CG2118-PA,CG2118-PB	2b	gi|24651757,gi|24651759	1	2
FLWPGFGENSR	CG10924-PA,CG10924-PB	2b	gi|24655082,gi|161077226	1	21
FNASQLITQR	CG15081-PA,CG15081-PB,CG15081-PC,CG15081-PD,CG15081-PE,CG15081-PF	2b	gi|161077238,gi|161077236,gi|161077234,gi|161077240,gi|161077242,gi|161077244	1	25
FNDWISQVVR	CG6206-PA,CG6206-PB	2b	gi|19921088,gi|24583443	1	68
FNGEPIVPSESIEIK	CG32019-PA,CG32019-PC,CG32019-PD,CG32019-PE	2b	gi|28558739,gi|45552151,gi|45552153,gi|45552149	0	787
FNIVESEAQK	CG11779-PA,CG11779-PB,CG11779-PC,CG11779-PD	2b	gi|24648138,gi|24648140,gi|78706782,gi|78706780	0	4
FNSDIASDGIFR	CG6206-PA,CG6206-PB	2b	gi|19921088,gi|24583443	1	68
FNTDDINFPIDNLR	CG5670-PA,CG5670-PB,CG5670-PC,CG5670-PD,CG5670-PE,CG5670-PF,CG5670-PG,CG5670-PH	2b	gi|24648576,gi|24648578,gi|24648580,gi|24648582,gi|45553441,gi|45553439,gi|45553437,gi|45553435	1	209
FPDSTSSPGEHGLGR	CG6643-PA,CG6643-PB	2b	gi|24649705,gi|45552026	1	10
FPEIQFEEK	CG12233-PA,CG12233-PB	2b	gi|24643268,gi|24643270	1	132
FPNQNVTR	CG14235-PA,CG14235-PB,CG14235-PC	2b	gi|24643375,gi|24643377,gi|24643379	1	12
FPQHLLLPR	CG17285-PA,CG17285-PB	2b	gi|24664081,gi|24664085	1	257
FPTEESCLAR	CG33103-PA,CG33103-PB	2b	gi|28572036,gi|28572038	0	438
FQLGEAAIVAQK	CG7356-PA,CG7356-PB	2b	gi|24582657,gi|24582659	1	19
FQQDEDPYYSK	CG15531-PA,CG15531-PB	2b	gi|24651333,gi|161079187	0	2
FSGDELALYQQR	CG18076-PA,CG18076-PB,CG18076-PC,CG18076-PE,CG18076-PG,CG18076-PH	2b	gi|24653493,gi|24653489,gi|24653495,gi|24653491,gi|24653487,gi|24653497	0	5
FSGPISAPVLLEVPFK	CG32019-PA,CG32019-PC,CG32019-PD,CG32019-PE	2b	gi|28558739,gi|45552151,gi|45552153,gi|45552149	1	787
FSIPVVLLDETLK	CG3725-PA,CG3725-PB,CG3725-PC,CG3725-PD,CG3725-PE,CG3725-PF,CG3725-PG,CG3725-PH	2b	gi|17136664,gi|24762445,gi|24762447,gi|24762449,gi|24762451,gi|24762453,gi|24762455,gi|24762457	1	581
FSNDWVSGK	CG32019-PA,CG32019-PC,CG32019-PD,CG32019-PE	2b	gi|28558739,gi|45552151,gi|45552153,gi|45552149	0	787
FSVSPVVR	CG2238-PA,CG2238-PB,CG2238-PC	2b	gi|24585709,gi|24585711,gi|24585713	1	30
FTDIMDEEIDDER	CG33519-PB,CG33519-PC	2b	gi|161077453,gi|161077455	1	65
FTEGSNPLFTTR	CG4758-PA,CG4758-PB	2b	gi|17136944,gi|24583206	1	4
FTLSQTAPGEEKPK	CG10844-PA,CG10844-PB,CG10844-PC,CG10844-PD	2b	gi|17352465,gi|17352467,gi|17352469,gi|17352471	1	11
FTLTYR	CG33950-PA,CG33950-PB,CG33950-PC,CG33950-PD,CG33950-PE,CG33950-PF,CG33950-PG	2b	gi|78706472,gi|78706470,gi|78706464,gi|78706466,gi|78706468,gi|78706474,gi|161077537	0	871
FTPGAFTNQIQPAFR	CG14792-PA,CG14792-PB,CG14792-PD	2b	gi|17136518,gi|24639112,gi|45551198	1	30
FTQVADDPETLR	CG3849-PA,CG3849-PB	2b	gi|28574882,gi|62484462	1	1
FTSMAVSGLTPGK	CG32019-PA,CG32019-PC,CG32019-PD,CG32019-PE	2b	gi|28558739,gi|45552151,gi|45552153,gi|45552149	0	787
FTTQITSVTVDEAEAVR	CG1915-PA,CG1915-PC	2b	gi|24655827,gi|161080703	0	363
FVIVEGK	CG4533-PA,CG4533-PB	2b	gi|17737499,gi|24762361	0	14
FVPQPVEISQQSVYDR	CG32019-PA,CG32019-PC,CG32019-PD,CG32019-PE	2b	gi|28558739,gi|45552151,gi|45552153,gi|45552149	0	787
FVSITQAAAGEYR	CG33950-PA,CG33950-PB,CG33950-PC,CG33950-PD,CG33950-PE,CG33950-PF,CG33950-PG	2b	gi|78706472,gi|78706470,gi|78706464,gi|78706466,gi|78706468,gi|78706474,gi|161077537	1	871
FVVMVTPEDLK	CG11198-PA,CG11198-PB,CG11198-PC,CG11198-PD	2b	gi|24586458,gi|24586460,gi|161076407,gi|161076409	1	52
FWQSYIR	CG6803-PA,CG6803-PB,CG6803-PC,CG6803-PD,CG6803-PE	2b	gi|24646989,gi|21357797,gi|24646991,gi|24646986,gi|24646984	1	71
FWYGGCDGNDNR	CG33103-PA,CG33103-PB	2b	gi|28572036,gi|28572038	0	438
FYFDGLIGK	CG32019-PA,CG32019-PC,CG32019-PD,CG32019-PE	2b	gi|28558739,gi|45552151,gi|45552153,gi|45552149	0	787
FYPEHLSCPVDK	CG10097-PA,CG10097-PB	2b	gi|24646271,gi|78706758	0	80
GAEFTHENPLETK	CG5670-PA,CG5670-PB,CG5670-PC,CG5670-PD,CG5670-PE,CG5670-PF,CG5670-PG,CG5670-PH	2b	gi|24648576,gi|24648578,gi|24648580,gi|24648582,gi|45553441,gi|45553439,gi|45553437,gi|45553435	1	209
GAEGLEQIQDLEDSLR	CG1915-PA,CG1915-PC	2b	gi|24655827,gi|161080703	1	363
GAFSNILR	CG16944-PA,CG16944-PB,CG16944-PC,CG16944-PD	2b	gi|18079273,gi|24641095,gi|24641090,gi|24641092	1	349
GAFTGEISPAMLK	CG2171-PA,CG2171-PB,CG2171-PC	2b	gi|28572004,gi|28572006,gi|28572008	1	22
GAGTIDASHAAAIAAVEAATK	CG7070-PA,CG7070-PB	2b	gi|28571814,gi|24648964	1	38
GALQDYQER	CG17927-PA,CG17927-PB,CG17927-PC,CG17927-PD,CG17927-PE,CG17927-PF,CG17927-PG,CG17927-PH,CG17927-PI,CG17927-PJ,CG17927-PK,CG17927-PL,CG17927-PM	2b	gi|24584704,gi|24584710,gi|24584692,gi|24584702,gi|24584696,gi|24584700,gi|24584694,gi|28574239,gi|24584706,gi|24584698,gi|24584712,gi|24584714,gi|24584716	1	2330
GANAPEDLTLR	CG4389-PA,CG4389-PB,CG4389-PC	2b	gi|19921000,gi|24583077,gi|24583079	1	210
GANAVGYTSYPDNVVYK	CG1516-PA,CG1516-PB,CG1516-PD,CG1516-PE,CG1516-PG,CG1516-PI,CG1516-PJ,CG1516-PK,CG1516-PL	2b	gi|24652210,gi|24652212,gi|24652214,gi|19921944,gi|24652216,gi|24652218,gi|24652220,gi|24652222,gi|24652224	1	469
GAPEGVLER	CG3725-PA,CG3725-PB,CG3725-PC,CG3725-PD,CG3725-PE,CG3725-PF,CG3725-PG,CG3725-PH	2b	gi|17136664,gi|24762445,gi|24762447,gi|24762449,gi|24762451,gi|24762453,gi|24762455,gi|24762457	1	581
GATPHPATASVSSQSNFGSSADK	CG6016-PA,CG6016-PB	2b	gi|24653393,gi|24653395	1	2
GATQQILDEADR	CG7033-PA,CG7033-PC	2b	gi|18858175,gi|28571140	1	1
GAYEEGQEQLEAVR	CG17927-PA,CG17927-PB,CG17927-PC,CG17927-PD,CG17927-PE,CG17927-PF,CG17927-PG,CG17927-PH,CG17927-PI,CG17927-PJ,CG17927-PK,CG17927-PL,CG17927-PM	2b	gi|24584704,gi|24584710,gi|24584692,gi|24584702,gi|24584696,gi|24584700,gi|24584694,gi|28574239,gi|24584706,gi|24584698,gi|24584712,gi|24584714,gi|24584716	1	2330
GCVTNVEQGLAAVNK	CG11198-PA,CG11198-PB,CG11198-PC,CG11198-PD	2b	gi|24586458,gi|24586460,gi|161076407,gi|161076409	1	52
GDDIAIIMYTSGSTGTPK	CG8732-PA,CG8732-PB,CG8732-PC,CG8732-PD,CG8732-PE,CG8732-PF,CG8732-PG,CG8732-PH,CG8732-PI	2b	gi|24586634,gi|22026970,gi|24586636,gi|62471689,gi|62471687,gi|62471685,gi|62471683,gi|62471681,gi|62471679	0	107
GDDLVAAVLESVPK	CG6455-PA,CG6455-PB	2b	gi|45549224,gi|24648875	1	49
GDEVVANR	CG33950-PA,CG33950-PB,CG33950-PC,CG33950-PD,CG33950-PE,CG33950-PF,CG33950-PG	2b	gi|78706472,gi|78706470,gi|78706464,gi|78706466,gi|78706468,gi|78706474,gi|161077537	0	871
GDLGIEIPAEK	CG7070-PA,CG7070-PB	2b	gi|28571814,gi|24648964	1	38
GDLYCEYCFEK	CG30084-PA,CG30084-PC,CG30084-PE,CG30084-PF,CG30084-PG,CG30084-PH	2b	gi|78707559,gi|78709100,gi|78707228,gi|161077121,gi|116007706,gi|161077123	1	100
GDNSVEFQPNTIQR	CG3991-PA,CG3991-PD	2b	gi|17137360,gi|24653270	1	3
GDQYYIKLELLDPQLEDSGLYK	CG32019-PA,CG32019-PC,CG32019-PD,CG32019-PE	2b	gi|28558739,gi|45552151,gi|45552153,gi|45552149	0	787
GDTHNALVTQFKPDSK	CG1634-PA,CG1634-PB,CG1634-PC	2b	gi|17530861,gi|24640619,gi|45554534	1	11
GEAVSQIVNLVDIPEEER	CG32019-PA,CG32019-PC,CG32019-PD,CG32019-PE	2b	gi|28558739,gi|45552151,gi|45552153,gi|45552149	1	787
GEDFAPCNYFQK	CG14235-PA,CG14235-PB,CG14235-PC	2b	gi|24643375,gi|24643377,gi|24643379	1	12
GEEEEEEAA	CG2184-PA,CG2184-PB	2b	gi|17933672,gi|45552007	0	196
GEELLEQGFGGIYGVGK	CG7340-PA,CG7340-PB,CG7340-PC	2b	gi|24646410,gi|21357381,gi|24646412	1	1
GEHTEAEGGVYDISNK	CG32031-PA,CG32031-PB,CG32031-PC,CG32031-PD,CG32031-PE,CG32031-PF	2b	gi|24661336,gi|24661340,gi|24661344,gi|24661348,gi|161082598,gi|161082600	1	143
GEPAPSLTWFLK	CG32019-PA,CG32019-PC,CG32019-PD,CG32019-PE	2b	gi|28558739,gi|45552151,gi|45552153,gi|45552149	1	787
GEPAPVITWYQNDK	CG32019-PA,CG32019-PC,CG32019-PD,CG32019-PE	2b	gi|28558739,gi|45552151,gi|45552153,gi|45552149	0	787
GEVVCEVVTAKPLDASQSK	CG4307-PA,CG4307-PB	2b	gi|24647054,gi|24647056	1	64
GEYPLECVLTMAK	CG7070-PA,CG7070-PB	2b	gi|28571814,gi|24648964	1	38
GFCHLYSGQEACAVGMK	CG7010-PA,CG7010-PB,CG7010-PC,CG7010-PD	2b	gi|28571106,gi|24639746,gi|24639740,gi|24639744	1	33
GFDPGQDTYTAPPPSGENVK	CG9244-PB,CG9244-PC	2b	gi|17864292,gi|161076999	1	473
GFGELSATPESK	CG4389-PA,CG4389-PB,CG4389-PC	2b	gi|19921000,gi|24583077,gi|24583079	1	210
GFGTDEDALINIICR	CG9968-PA,CG9968-PB	2b	gi|17736989,gi|24642523	1	7
GFITDGPDILCPDCAK	CG32171-PA,CG32171-PB,CG32171-PC,CG32171-PD,CG32171-PE,CG32171-PF,CG32171-PG,CG32171-PH	2b	gi|45550635,gi|21356031,gi|24665618,gi|24665611,gi|45553169,gi|45553167,gi|45553165,gi|45553163	1	62
GFLAIVK	CG5730-PA,CG5730-PB,CG5730-PC,CG5730-PD	2b	gi|17136266,gi|17136264,gi|45553447,gi|45553445	0	61
GFTAVLK	CG12740-PA,CG12740-PB,CG12740-PC,CG12740-PD	2b	gi|24656625,gi|24656628,gi|24656637,gi|24656632	0	8
GFTDIPQGDEK	CG6692-PA,CG6692-PB,CG6692-PC	2b	gi|24653516,gi|24653518,gi|24653514	1	104
GGGFATVSSAYK	CG17927-PA,CG17927-PB,CG17927-PC,CG17927-PD,CG17927-PE,CG17927-PF,CG17927-PG,CG17927-PH,CG17927-PI,CG17927-PJ,CG17927-PK,CG17927-PL,CG17927-PM	2b	gi|24584704,gi|24584710,gi|24584692,gi|24584702,gi|24584696,gi|24584700,gi|24584694,gi|28574239,gi|24584706,gi|24584698,gi|24584712,gi|24584714,gi|24584716	1	2330
GGILSPLSTGSSGFGSR	CG18076-PA,CG18076-PB,CG18076-PC,CG18076-PE,CG18076-PG,CG18076-PH	2b	gi|24653493,gi|24653489,gi|24653495,gi|24653491,gi|24653487,gi|24653497	0	5
GGPPGLGIGLK	CG15081-PA,CG15081-PB,CG15081-PC,CG15081-PD,CG15081-PE,CG15081-PF	2b	gi|161077238,gi|161077236,gi|161077234,gi|161077240,gi|161077242,gi|161077244	1	25
GGPSDPSDPSSTIICKPR	CG32019-PA,CG32019-PC,CG32019-PD,CG32019-PE	2b	gi|28558739,gi|45552151,gi|45552153,gi|45552149	1	787
GGPVPTGPTPSLITWK	CG3979-PA,CG3979-PB,CG3979-PC	2b	gi|17737623,gi|45551633,gi|24666468	0	9
GGYMEVLNLDPK	CG1640-PA,CG1640-PB,CG1640-PC,CG1640-PD,CG1640-PE,CG1640-PF	2b	gi|24641760,gi|45551451,gi|24641764,gi|24641766,gi|24641768,gi|24641770	1	25
GHDIVLIGNGLK	CG33950-PA,CG33950-PB,CG33950-PC,CG33950-PD,CG33950-PE,CG33950-PF,CG33950-PG	2b	gi|78706472,gi|78706470,gi|78706464,gi|78706466,gi|78706468,gi|78706474,gi|161077537	1	871
GIFLYDGQK	CG4389-PA,CG4389-PB,CG4389-PC	2b	gi|19921000,gi|24583077,gi|24583079	1	210
GIGQVQK	CG4389-PA,CG4389-PB,CG4389-PC	2b	gi|19921000,gi|24583077,gi|24583079	0	210
GIIDSTVSENR	CG2165-PA,CG2165-PB,CG2165-PC,CG2165-PD,CG2165-PE	2b	gi|62484399,gi|62484401,gi|62473120,gi|62473111,gi|62473099	1	35
GIILGIK	CG6058-PA,CG6058-PB,CG6058-PC,CG6058-PD,CG6058-PE,CG6058-PF,CG6058-PG,CG6058-PH	2b	gi|45551983,gi|24650278,gi|24650280,gi|24650282,gi|24650288,gi|24650276,gi|45551985,gi|45553577	0	57
GILAADESGPTMGK	CG6058-PA,CG6058-PB,CG6058-PC,CG6058-PD,CG6058-PE,CG6058-PF,CG6058-PG,CG6058-PH	2b	gi|45551983,gi|24650278,gi|24650280,gi|24650282,gi|24650288,gi|24650276,gi|45551985,gi|45553577	1	57
GISQEQLNEFR	CG4376-PA,CG4376-PB,CG4376-PC	2b	gi|24639238,gi|24639240,gi|17137758	1	241
GKDFDAVGFVK	CG16944-PA,CG16944-PB,CG16944-PC,CG16944-PD	2b	gi|18079273,gi|24641095,gi|24641090,gi|24641092	0	349
GKEYDYEPELAELR	CG10960-PA,CG10960-PB,CG10960-PC	2b	gi|24663515,gi|24663511,gi|24663519	1	1
GLDPEALTGK	CG7107-PA,CG7107-PB,CG7107-PD,CG7107-PE,CG7107-PF,CG7107-PG	2b	gi|24641813,gi|24641811,gi|24641815,gi|62473677,gi|62473664,gi|62473654	1	236
GLEDLDTPLSESR	CG8421-PA,CG8421-PB,CG8421-PD,CG8421-PE	2b	gi|24654024,gi|17647175,gi|24654027,gi|28573452	1	1
GLELAEK	CG4376-PA,CG4376-PB,CG4376-PC	2b	gi|24639238,gi|24639240,gi|17137758	0	241
GLGSASLVEK	CG33950-PA,CG33950-PB,CG33950-PC,CG33950-PD,CG33950-PE,CG33950-PF,CG33950-PG	2b	gi|78706472,gi|78706470,gi|78706464,gi|78706466,gi|78706468,gi|78706474,gi|161077537	0	871
GLIALFR	CG4389-PA,CG4389-PB,CG4389-PC	2b	gi|19921000,gi|24583077,gi|24583079	0	210
GLITPIVFNADR	CG5261-PA,CG5261-PB	2b	gi|24582497,gi|20129315	1	69
GLQSIAEER	CG17420-PA,CG17420-PB,CG17420-PC,CG17420-PD	2b	gi|62862016,gi|62862018,gi|161076131,gi|161076128	1	9
GLTLDQIK	CG3725-PA,CG3725-PB,CG3725-PC,CG3725-PD,CG3725-PE,CG3725-PF,CG3725-PG,CG3725-PH	2b	gi|17136664,gi|24762445,gi|24762447,gi|24762449,gi|24762451,gi|24762453,gi|24762455,gi|24762457	1	581
GLVDDLNLPNAGVTVQK	CG2151-PA,CG2151-PB,CG2151-PC	2b	gi|24640549,gi|24640551,gi|24640553	1	6
GLVPLIYK	CG7070-PA,CG7070-PB	2b	gi|28571814,gi|24648964	1	38
GLYSNPPVHGAR	CG4233-PA,CG4233-PB,CG4233-PC	2b	gi|24580970,gi|24580972,gi|19920542	1	88
GMAQSYEENLQEK	CG1915-PA,CG1915-PC	2b	gi|24655827,gi|161080703	0	363
GMGGAMDLVAAPGTK	CG1140-PA,CG1140-PB	2b	gi|21358325,gi|24655794	1	10
GMRVVRKMEDVEESFQR	CG1516-PA,CG1516-PB,CG1516-PD,CG1516-PE,CG1516-PG,CG1516-PI,CG1516-PJ,CG1516-PK,CG1516-PL	2b	gi|24652210,gi|24652212,gi|24652214,gi|19921944,gi|24652216,gi|24652218,gi|24652220,gi|24652222,gi|24652224	0	469
GMVDCFIR	CG16944-PA,CG16944-PB,CG16944-PC,CG16944-PD	2b	gi|18079273,gi|24641095,gi|24641090,gi|24641092	1	349
GNGTVSYADFADVVQK	CG2139-PA,CG2139-PB,CG2139-PC,CG2139-PD	2b	gi|24651389,gi|45552009,gi|24651387,gi|24651391	1	61
GNHPEVPPTAEDLCTVCYTSGTTGNPK	CG3961-PA,CG3961-PB,CG3961-PC	2b	gi|24666497,gi|24666505,gi|24666501	0	20
GNMSEADAVQYIK	CG11567-PA,CG11567-PB	2b	gi|17137192,gi|24582192	1	177
GNMSEADAVQYIKKMEAQK	CG11567-PA,CG11567-PB	2b	gi|17137192,gi|24582192	0	177
GNPLLDAVNSLR	CG6904-PA,CG6904-PB,CG6904-PC	2b	gi|45551893,gi|21357845,gi|24646982	1	27
GNPQVAYEYYEK	CG13865-PA,CG13865-PB	2b	gi|116007256,gi|116007258	1	9
GPAIEVFALTQAFK	CG8430-PA,CG8430-PB	2b	gi|19922362,gi|24654046	1	7
GPDFEGCGLASPVAK	CG33103-PA,CG33103-PB	2b	gi|28572036,gi|28572038	0	438
GPFDEGCPIAK	CG33103-PA,CG33103-PB	2b	gi|28572036,gi|28572038	0	438
GPFITALGR	CG30084-PA,CG30084-PC,CG30084-PE,CG30084-PF,CG30084-PG,CG30084-PH	2b	gi|78707559,gi|78709100,gi|78707228,gi|161077121,gi|116007706,gi|161077123	1	100
GPLAVSDVTASGCK	CG32019-PA,CG32019-PC,CG32019-PD,CG32019-PE	2b	gi|28558739,gi|45552151,gi|45552153,gi|45552149	1	787
GPLMTPVGK	CG12233-PA,CG12233-PB	2b	gi|24643268,gi|24643270	1	132
GPLQDIVTK	CG8779-PA,CG8779-PB	2b	gi|78707507,gi|116007846	0	10
GPLQVNDITK	CG32019-PA,CG32019-PC,CG32019-PD,CG32019-PE	2b	gi|28558739,gi|45552151,gi|45552153,gi|45552149	1	787
GPNFTIAK	CG7107-PA,CG7107-PB,CG7107-PD,CG7107-PE,CG7107-PF,CG7107-PG	2b	gi|24641813,gi|24641811,gi|24641815,gi|62473677,gi|62473664,gi|62473654	1	236
GPNGDGCTCVESK	CG33103-PA,CG33103-PB	2b	gi|28572036,gi|28572038	0	438
GPNNEGCECHYTPYGCCPDNK	CG33103-PA,CG33103-PB	2b	gi|28572036,gi|28572038	0	438
GQESAGIVTSLGK	CG10078-PA,CG10078-PB	2b	gi|24659604,gi|24659598	0	5
GQFLQPENAPVPEK	CG11198-PA,CG11198-PB,CG11198-PC,CG11198-PD	2b	gi|24586458,gi|24586460,gi|161076407,gi|161076409	1	52
GQNIYNCDYNQPPPK	CG9261-PA,CG9261-PC,CG9261-PD,CG9261-PE,CG9261-PF	2b	gi|17137214,gi|17137212,gi|24582331,gi|62471617,gi|62471615	1	6
GQQAQQVVGIQQLVGENGR	CG17285-PA,CG17285-PB	2b	gi|24664081,gi|24664085	1	257
GQYLMPNIGYGSNK	CG7939-PA,CG7939-PB,CG7939-PC	2b	gi|17864106,gi|24651276,gi|24651273	1	5
GQYSNPPAYGAR	CG8430-PA,CG8430-PB	2b	gi|19922362,gi|24654046	1	7
GREEQAEQDGEEEGGR	CG17927-PA,CG17927-PB,CG17927-PC,CG17927-PD,CG17927-PE,CG17927-PF,CG17927-PG,CG17927-PH,CG17927-PI,CG17927-PJ,CG17927-PK,CG17927-PL,CG17927-PM	2b	gi|24584704,gi|24584710,gi|24584692,gi|24584702,gi|24584696,gi|24584700,gi|24584694,gi|28574239,gi|24584706,gi|24584698,gi|24584712,gi|24584714,gi|24584716	1	2330
GSGLPASSDVQTVSQEHNTESSR	CG33484-PA,CG33484-PB,CG33484-PC,CG33484-PD	2b	gi|45580802,gi|116007758,gi|116007760,gi|116007762	1	226
GSGRPVNGPDVIITGNR	CG33950-PA,CG33950-PB,CG33950-PC,CG33950-PD,CG33950-PE,CG33950-PF,CG33950-PG	2b	gi|78706472,gi|78706470,gi|78706464,gi|78706466,gi|78706468,gi|78706474,gi|161077537	1	871
GSIVSWEK	CG5261-PA,CG5261-PB	2b	gi|24582497,gi|20129315	1	69
GSLEDQVVQTNPVLEAFGNAK	CG17927-PA,CG17927-PB,CG17927-PC,CG17927-PD,CG17927-PE,CG17927-PF,CG17927-PG,CG17927-PH,CG17927-PI,CG17927-PJ,CG17927-PK,CG17927-PL,CG17927-PM	2b	gi|24584704,gi|24584710,gi|24584692,gi|24584702,gi|24584696,gi|24584700,gi|24584694,gi|28574239,gi|24584706,gi|24584698,gi|24584712,gi|24584714,gi|24584716	1	2330
GSLSNGRGFGGGGGGGGEGRHSR	CG10279-PA,CG10279-PB,CG10279-PC,CG10279-PD,CG10279-PE,CG10279-PF	2b	gi|24644479,gi|45551833,gi|24644485,gi|24644481,gi|24644483,gi|24644487	0	3
GSQPVAPPEPEAVIEEVNAK	CG9432-PA,CG9432-PB,CG9432-PD,CG9432-PE	2b	gi|24586060,gi|24586058,gi|116007558,gi|116007556	1	102
GSQVVAAETIR	CG3082-PA,CG3082-PB,CG3082-PC,CG3082-PD	2b	gi|24659015,gi|24659021,gi|19922796,gi|24659033	1	6
GSVLGNQLFSYGGR	CG33950-PA,CG33950-PB,CG33950-PC,CG33950-PD,CG33950-PE,CG33950-PF,CG33950-PG	2b	gi|78706472,gi|78706470,gi|78706464,gi|78706466,gi|78706468,gi|78706474,gi|161077537	1	871
GTDAGYEAER	CG4389-PA,CG4389-PB,CG4389-PC	2b	gi|19921000,gi|24583077,gi|24583079	1	210
GTDGQVIDEVINDFK	CG7176-PA,CG7176-PB,CG7176-PC,CG7176-PD,CG7176-PE,CG7176-PF,CG7176-PG	2b	gi|24660860,gi|24660849,gi|21356561,gi|24660856,gi|24660864,gi|24660868,gi|28574947	1	35
GTDQIESVLDIK	CG33519-PB,CG33519-PC	2b	gi|161077453,gi|161077455	0	65
GTIAYDIDHIQER	CG7010-PA,CG7010-PB,CG7010-PC,CG7010-PD	2b	gi|28571106,gi|24639746,gi|24639740,gi|24639744	1	33
GTIISDTQHPEGLEK	CG1915-PA,CG1915-PC	2b	gi|24655827,gi|161080703	1	363
GTLEAENADLATELR	CG15792-PA,CG15792-PB,CG15792-PC,CG15792-PD	2b	gi|24762816,gi|24762818,gi|62471820,gi|62471805	1	10
GTRPVNNDALEIVK	CG4389-PA,CG4389-PB,CG4389-PC	2b	gi|19921000,gi|24583077,gi|24583079	1	210
GTVIIIANHGDR	CG4347-PA,CG4347-PC	2b	gi|62484278,gi|62484452	1	69
GVFTVEGPGIEQPLK	CG7356-PA,CG7356-PB	2b	gi|24582657,gi|24582659	0	19
GVSEILEGGR	CG32019-PA,CG32019-PC,CG32019-PD,CG32019-PE	2b	gi|28558739,gi|45552151,gi|45552153,gi|45552149	1	787
GVSQEGAYPYIDNK	CG4847-PA,CG4847-PB,CG4847-PC,CG4847-PD,CG4847-PE	2b	gi|19922450,gi|24654437,gi|24654439,gi|24654434,gi|45552699	1	1
GVTVTDWLGK	CG10924-PA,CG10924-PB	2b	gi|24655082,gi|161077226	1	21
GVVISCGDHTVMGR	CG5670-PA,CG5670-PB,CG5670-PC,CG5670-PD,CG5670-PE,CG5670-PF,CG5670-PG,CG5670-PH	2b	gi|24648576,gi|24648578,gi|24648580,gi|24648582,gi|45553441,gi|45553439,gi|45553437,gi|45553435	1	209
GVVPLFGSEDEVTTQGLDDLAAR	CG6058-PA,CG6058-PB,CG6058-PC,CG6058-PD,CG6058-PE,CG6058-PF,CG6058-PG,CG6058-PH	2b	gi|45551983,gi|24650278,gi|24650280,gi|24650282,gi|24650288,gi|24650276,gi|45551985,gi|45553577	1	57
GVYSCVAENDHGSDLSSTSIDIEPR	CG33950-PA,CG33950-PB,CG33950-PC,CG33950-PD,CG33950-PE,CG33950-PF,CG33950-PG	2b	gi|78706472,gi|78706470,gi|78706464,gi|78706466,gi|78706468,gi|78706474,gi|161077537	1	871
GYLGECGIR	CG1640-PA,CG1640-PB,CG1640-PC,CG1640-PD,CG1640-PE,CG1640-PF	2b	gi|24641760,gi|45551451,gi|24641764,gi|24641766,gi|24641768,gi|24641770	1	25
HDGGSPITGYIIEK	CG32019-PA,CG32019-PC,CG32019-PD,CG32019-PE	2b	gi|28558739,gi|45552151,gi|45552153,gi|45552149	1	787
HEAFESDLAAHQDR	CG4376-PA,CG4376-PB,CG4376-PC	2b	gi|24639238,gi|24639240,gi|17137758	1	241
HGLPVIFK	CG1516-PA,CG1516-PB,CG1516-PD,CG1516-PE,CG1516-PG,CG1516-PI,CG1516-PJ,CG1516-PK,CG1516-PL	2b	gi|24652210,gi|24652212,gi|24652214,gi|19921944,gi|24652216,gi|24652218,gi|24652220,gi|24652222,gi|24652224	1	469
HGTAEISCNLECVDKPR	CG1915-PA,CG1915-PC	2b	gi|24655827,gi|161080703	0	363
HIEVQLLGDK	CG1516-PA,CG1516-PB,CG1516-PD,CG1516-PE,CG1516-PG,CG1516-PI,CG1516-PJ,CG1516-PK,CG1516-PL	2b	gi|24652210,gi|24652212,gi|24652214,gi|19921944,gi|24652216,gi|24652218,gi|24652220,gi|24652222,gi|24652224	1	469
HLPEDETFQLVSK	CG3861-PA,CG3861-PB	2b	gi|24640126,gi|24640124	1	71
HLQQLTENGHQVVPEEER	CG33519-PB,CG33519-PC	2b	gi|161077453,gi|161077455	1	65
HLTDDAASVVVK	CG32019-PA,CG32019-PC,CG32019-PD,CG32019-PE	2b	gi|28558739,gi|45552151,gi|45552153,gi|45552149	1	787
HLTTDAVCHVSGVCASR	CG12070-PA,CG12070-PB	2b	gi|17864128,gi|28571996	1	12
HNDAVAEMAEQVDQLNK	CG17927-PA,CG17927-PB,CG17927-PC,CG17927-PD,CG17927-PE,CG17927-PF,CG17927-PG,CG17927-PH,CG17927-PI,CG17927-PJ,CG17927-PK,CG17927-PL,CG17927-PM	2b	gi|24584704,gi|24584710,gi|24584692,gi|24584702,gi|24584696,gi|24584700,gi|24584694,gi|28574239,gi|24584706,gi|24584698,gi|24584712,gi|24584714,gi|24584716	1	2330
HNVTAQSISGTGALR	CG4233-PA,CG4233-PB,CG4233-PC	2b	gi|24580970,gi|24580972,gi|19920542	1	88
HPAQDDLTYEAQN	CG2803-PA,CG2803-PB	2b	gi|24762794,gi|85725076	1	4
HPASNFGDVSTFGNVDPTNEYVISTR	CG32031-PA,CG32031-PB,CG32031-PC,CG32031-PD,CG32031-PE,CG32031-PF	2b	gi|24661336,gi|24661340,gi|24661344,gi|24661348,gi|161082598,gi|161082600	1	143
HVQEAAEAIAPPQFK	CG1915-PA,CG1915-PC	2b	gi|24655827,gi|161080703	1	363
HVVEQVHEEQER	CG5939-PA,CG5939-PB,CG5939-PC,CG5939-PD	2b	gi|24661112,gi|24661116,gi|24661120,gi|24661124	1	578
HVVNAVNEILKD	CG8036-PB,CG8036-PC,CG8036-PD	2b	gi|45550715,gi|45551847,gi|24645119	1	18
HYSTHGQAVEQAR	CG15825-PA,CG15825-PB	2b	gi|24585183,gi|20129625	1	86
IAAEILNNEDLR	CG4233-PA,CG4233-PB,CG4233-PC	2b	gi|24580970,gi|24580972,gi|19920542	1	88
IAAEVAAPLAK	CG32593-PA,CG32593-PB,CG32593-PC,CG32593-PD,CG32593-PE,CG32593-PF	2b	gi|24642027,gi|24642031,gi|24642061,gi|24642065,gi|24642029,gi|24642033	1	32
IAAGSSRPEK	CG4389-PA,CG4389-PB,CG4389-PC	2b	gi|19921000,gi|24583077,gi|24583079	1	210
IADLLLK	CG12070-PA,CG12070-PB	2b	gi|17864128,gi|28571996	0	12
IAEIPVGGTAAATFK	CG7356-PA,CG7356-PB	2b	gi|24582657,gi|24582659	0	19
IAELEGLGSR	CG1915-PA,CG1915-PC	2b	gi|24655827,gi|161080703	0	363
IAELTSLPFVTAPNK	CG4094-PA,CG4094-PB	2b	gi|24640177,gi|24640179	1	30
IAEVPFNSTNK	CG5670-PA,CG5670-PB,CG5670-PC,CG5670-PD,CG5670-PE,CG5670-PF,CG5670-PG,CG5670-PH	2b	gi|24648576,gi|24648578,gi|24648580,gi|24648582,gi|45553441,gi|45553439,gi|45553437,gi|45553435	1	209
IAGLASGLDTGETPIAK	CG5670-PA,CG5670-PB,CG5670-PC,CG5670-PD,CG5670-PE,CG5670-PF,CG5670-PG,CG5670-PH	2b	gi|24648576,gi|24648578,gi|24648580,gi|24648582,gi|45553441,gi|45553439,gi|45553437,gi|45553435	1	209
IANLEEQLENEGK	CG15792-PA,CG15792-PB,CG15792-PC,CG15792-PD	2b	gi|24762816,gi|24762818,gi|62471820,gi|62471805	1	10
IANLEYSMVR	CG1915-PA,CG1915-PC	2b	gi|24655827,gi|161080703	0	363
IAPNQTAELEDK	CG11949-PA,CG11949-PB,CG11949-PC,CG11949-PD	2b	gi|24655527,gi|24655522,gi|24655517,gi|24655532	0	43
ICLDQLER	CG32019-PA,CG32019-PC,CG32019-PD,CG32019-PE	2b	gi|28558739,gi|45552151,gi|45552153,gi|45552149	0	787
ICTNQLKPNDLIDCIR	CG9042-PA,CG9042-PB,CG9042-PC	2b	gi|17136204,gi|17136200,gi|17136202	1	16
IDAPLVLDQLR	CG15792-PA,CG15792-PB,CG15792-PC,CG15792-PD	2b	gi|24762816,gi|24762818,gi|62471820,gi|62471805	1	10
IDDDTDSFGVDFVK	CG9432-PA,CG9432-PB,CG9432-PD,CG9432-PE	2b	gi|24586060,gi|24586058,gi|116007558,gi|116007556	1	102
IDGVTLDDGLNSELAK	CG4912-PA,CG4912-PB	2b	gi|24583273,gi|19921046	1	3
IDIPAGAILENK	CG4347-PA,CG4347-PC	2b	gi|62484278,gi|62484452	1	69
IDKPGAASEDELR	CG7073-PA,CG7073-PB,CG7073-PC,CG7073-PD,CG7073-PE	2b	gi|24648946,gi|21355813,gi|24648948,gi|24648950,gi|45553457	1	4
IDQSILTGESVSVIK	CG3725-PA,CG3725-PB,CG3725-PC,CG3725-PD,CG3725-PE,CG3725-PF,CG3725-PG,CG3725-PH	2b	gi|17136664,gi|24762445,gi|24762447,gi|24762449,gi|24762451,gi|24762453,gi|24762455,gi|24762457	1	581
IDQSKPYDSK	CG17927-PA,CG17927-PB,CG17927-PC,CG17927-PD,CG17927-PE,CG17927-PF,CG17927-PG,CG17927-PH,CG17927-PI,CG17927-PJ,CG17927-PK,CG17927-PL,CG17927-PM	2b	gi|24584704,gi|24584710,gi|24584692,gi|24584702,gi|24584696,gi|24584700,gi|24584694,gi|28574239,gi|24584706,gi|24584698,gi|24584712,gi|24584714,gi|24584716	0	2330
IDYFSER	CG5730-PA,CG5730-PB,CG5730-PC,CG5730-PD	2b	gi|17136266,gi|17136264,gi|45553447,gi|45553445	1	61
IDYSDLSNIAPEHYTK	CG2139-PA,CG2139-PB,CG2139-PC,CG2139-PD	2b	gi|24651389,gi|45552009,gi|24651387,gi|24651391	1	61
IEDEIAR	CG17927-PA,CG17927-PB,CG17927-PC,CG17927-PD,CG17927-PE,CG17927-PF,CG17927-PG,CG17927-PH,CG17927-PI,CG17927-PJ,CG17927-PK,CG17927-PL,CG17927-PM	2b	gi|24584704,gi|24584710,gi|24584692,gi|24584702,gi|24584696,gi|24584700,gi|24584694,gi|28574239,gi|24584706,gi|24584698,gi|24584712,gi|24584714,gi|24584716	1	2330
IEDFLER	CG3395-PA,CG3395-PB,CG3395-PD	2b	gi|24661707,gi|24661715,gi|24661711	1	34
IEDLNTVLGQTQDHR	CG1709-PA,CG1709-PB,CG1709-PC,CG1709-PD,CG1709-PE,CG1709-PF,CG1709-PG,CG1709-PH	2b	gi|24650959,gi|24650965,gi|24650956,gi|24650967,gi|21358171,gi|24650961,gi|24650963,gi|45551995	1	17
IEDTGTYTCR	CG1915-PA,CG1915-PC	2b	gi|24655827,gi|161080703	0	363
IEELEEEVEAER	CG17927-PA,CG17927-PB,CG17927-PC,CG17927-PD,CG17927-PE,CG17927-PF,CG17927-PG,CG17927-PH,CG17927-PI,CG17927-PJ,CG17927-PK,CG17927-PL,CG17927-PM	2b	gi|24584704,gi|24584710,gi|24584692,gi|24584702,gi|24584696,gi|24584700,gi|24584694,gi|28574239,gi|24584706,gi|24584698,gi|24584712,gi|24584714,gi|24584716	1	2330
IEETVPSSNYLACR	CG33103-PA,CG33103-PB	2b	gi|28572036,gi|28572038	1	438
IEMSNLDGTGR	CG12908-PA,CG12908-PB	2b	gi|24652408,gi|45552547	0	41
IENAGVTK	CG3359-PB,CG3359-PC,CG3359-PD,CG3359-PE,CG3359-PF,CG3359-PG,CG3359-PH,CG3359-PI,CG3359-PJ,CG3359-PK,CG3359-PL,CG3359-PM,CG3359-PN,CG3359-PO,CG3359-PP	2b	gi|24646161,gi|24646163,gi|28573039,gi|28573041,gi|28573043,gi|28573045,gi|28573047,gi|28573049,gi|28573051,gi|28573053,gi|28573061,gi|28573055,gi|28573057,gi|28573059,gi|28573037	0	29
IENPLVLIDEVDK	CG8798-PA,CG8798-PB	2b	gi|24666867,gi|24666871	1	6
IEPVTDPNLK	CG1915-PA,CG1915-PC	2b	gi|24655827,gi|161080703	0	363
IFADNVYGR	CG32019-PA,CG32019-PC,CG32019-PD,CG32019-PE	2b	gi|28558739,gi|45552151,gi|45552153,gi|45552149	1	787
IFAQNVAGLSTESSASQAVK	CG32019-PA,CG32019-PC,CG32019-PD,CG32019-PE	2b	gi|28558739,gi|45552151,gi|45552153,gi|45552149	1	787
IFCDAGFTTVK	CG8430-PA,CG8430-PB	2b	gi|19922362,gi|24654046	1	7
IFDLGR	CG17521-PA,CG17521-PB	2b	gi|116008436,gi|116008514	1	6
IFLGPAEDQQGR	CG17285-PA,CG17285-PB	2b	gi|24664081,gi|24664085	1	257
IFLTGPK	CG1516-PA,CG1516-PB,CG1516-PD,CG1516-PE,CG1516-PG,CG1516-PI,CG1516-PJ,CG1516-PK,CG1516-PL	2b	gi|24652210,gi|24652212,gi|24652214,gi|19921944,gi|24652216,gi|24652218,gi|24652220,gi|24652222,gi|24652224	0	469
IFSAGLDVTDPEPLSPK	CG9331-PA,CG9331-PB,CG9331-PC,CG9331-PD,CG9331-PE	2b	gi|45551003,gi|24585514,gi|28574284,gi|28574282,gi|45552429	1	11
IFYSGDQPLTVILK	CG32019-PA,CG32019-PC,CG32019-PD,CG32019-PE	2b	gi|28558739,gi|45552151,gi|45552153,gi|45552149	1	787
IGAAFLAK	CG4233-PA,CG4233-PB,CG4233-PC	2b	gi|24580970,gi|24580972,gi|19920542	0	88
IGADPVEHDTSK	CG33103-PA,CG33103-PB	2b	gi|28572036,gi|28572038	1	438
IGASPPSAHSDSCTTQPDVPFK	CG1634-PA,CG1634-PB,CG1634-PC	2b	gi|17530861,gi|24640619,gi|45554534	1	11
IGDCDIYEGMVAK	CG33519-PB,CG33519-PC	2b	gi|161077453,gi|161077455	1	65
IGEAISQSSIR	CG1915-PA,CG1915-PC	2b	gi|24655827,gi|161080703	1	363
IGELEAPK	CG1915-PA,CG1915-PC	2b	gi|24655827,gi|161080703	1	363
IGELMNEVVNK	CG3991-PA,CG3991-PD	2b	gi|17137360,gi|24653270	1	3
IGELVESER	CG2140-PA,CG2140-PB	2b	gi|24586293,gi|24586291	1	63
IGGDVAQHAELVK	CG33979-PA,CG33979-PB	2b	gi|85724872,gi|85724874	1	6
IGQPIMSVR	CG17521-PA,CG17521-PB	2b	gi|116008436,gi|116008514	1	6
IGSAEAHAIELVGK	CG32593-PA,CG32593-PB,CG32593-PC,CG32593-PD,CG32593-PE,CG32593-PF	2b	gi|24642027,gi|24642031,gi|24642061,gi|24642065,gi|24642029,gi|24642033	1	32
IGVFAEDEDTTGK	CG3725-PA,CG3725-PB,CG3725-PC,CG3725-PD,CG3725-PE,CG3725-PF,CG3725-PG,CG3725-PH	2b	gi|17136664,gi|24762445,gi|24762447,gi|24762449,gi|24762451,gi|24762453,gi|24762455,gi|24762457	1	581
IGVLDESR	CG3395-PA,CG3395-PB,CG3395-PD	2b	gi|24661707,gi|24661715,gi|24661711	1	34
IHFGPTGK	CG17927-PA,CG17927-PB,CG17927-PC,CG17927-PD,CG17927-PE,CG17927-PF,CG17927-PG,CG17927-PH,CG17927-PI,CG17927-PJ,CG17927-PK,CG17927-PL,CG17927-PM	2b	gi|24584704,gi|24584710,gi|24584692,gi|24584702,gi|24584696,gi|24584700,gi|24584694,gi|28574239,gi|24584706,gi|24584698,gi|24584712,gi|24584714,gi|24584716	1	2330
IHQAVQESMIFENR	CG4376-PA,CG4376-PB,CG4376-PC	2b	gi|24639238,gi|24639240,gi|17137758	1	241
IIAEAANGPTTPAADK	CG5320-PA,CG5320-PB,CG5320-PE,CG5320-PF	2b	gi|45549226,gi|24649460,gi|45553473,gi|45553475	1	156
IIDPQAASPPLIVKPLR	CG32019-PA,CG32019-PC,CG32019-PD,CG32019-PE	2b	gi|28558739,gi|45552151,gi|45552153,gi|45552149	1	787
IIGEWK	CG17927-PA,CG17927-PB,CG17927-PC,CG17927-PD,CG17927-PE,CG17927-PF,CG17927-PG,CG17927-PH,CG17927-PI,CG17927-PJ,CG17927-PK,CG17927-PL,CG17927-PM	2b	gi|24584704,gi|24584710,gi|24584692,gi|24584702,gi|24584696,gi|24584700,gi|24584694,gi|28574239,gi|24584706,gi|24584698,gi|24584712,gi|24584714,gi|24584716	0	2330
IIGEYGLR	CG3395-PA,CG3395-PB,CG3395-PD	2b	gi|24661707,gi|24661715,gi|24661711	1	34
IIHESGFTAEDFK	CG2204-PA,CG2204-PB,CG2204-PC,CG2204-PD,CG2204-PE,CG2204-PF,CG2204-PG,CG2204-PH,CG2204-PI	2b	gi|24652448,gi|24652446,gi|24652450,gi|28573331,gi|28573333,gi|28573335,gi|28573337,gi|45552559,gi|45552557	1	6
IIKPGGSDPDDFEK	CG1883-PA,CG1883-PB,CG1883-PC,CG1883-PD	2b	gi|21358459,gi|24651339,gi|24651337,gi|45553763	1	25
IIMSGGAPLSADTHEQIK	CG8732-PA,CG8732-PB,CG8732-PC,CG8732-PD,CG8732-PE,CG8732-PF,CG8732-PG,CG8732-PH,CG8732-PI	2b	gi|24586634,gi|22026970,gi|24586636,gi|62471689,gi|62471687,gi|62471685,gi|62471683,gi|62471681,gi|62471679	1	107
IIPDNGPAGQNPSNVK	CG11661-PA,CG11661-PB,CG11661-PC,CG11661-PE,CG11661-PF,CG11661-PG,CG11661-PH,CG11661-PI	2b	gi|24665669,gi|24665673,gi|24665677,gi|28574585,gi|28574590,gi|28574592,gi|161084450,gi|161084461	1	218
IIQEEQQLR	CG33715-PB,CG33715-PD,CG33715-PE	2b	gi|161076702,gi|161076705,gi|78706840	1	109
IISMQQGGDLGQIYK	CG32031-PA,CG32031-PB,CG32031-PC,CG32031-PD,CG32031-PE,CG32031-PF	2b	gi|24661336,gi|24661340,gi|24661344,gi|24661348,gi|161082598,gi|161082600	1	143
IITPLNEVR	CG32019-PA,CG32019-PC,CG32019-PD,CG32019-PE	2b	gi|28558739,gi|45552151,gi|45552153,gi|45552149	0	787
IIWDSIK	CG7176-PA,CG7176-PB,CG7176-PC,CG7176-PD,CG7176-PE,CG7176-PF,CG7176-PG	2b	gi|24660860,gi|24660849,gi|21356561,gi|24660856,gi|24660864,gi|24660868,gi|28574947	1	35
IKPLAIEGFGEAK	CG7107-PA,CG7107-PB,CG7107-PD,CG7107-PE,CG7107-PF,CG7107-PG	2b	gi|24641813,gi|24641811,gi|24641815,gi|62473677,gi|62473664,gi|62473654	1	236
ILAADKPYILPDELR	CG4376-PA,CG4376-PB,CG4376-PC	2b	gi|24639238,gi|24639240,gi|17137758	1	241
ILALTGQYGTGR	CG3725-PA,CG3725-PB,CG3725-PC,CG3725-PD,CG3725-PE,CG3725-PF,CG3725-PG,CG3725-PH	2b	gi|17136664,gi|24762445,gi|24762447,gi|24762449,gi|24762451,gi|24762453,gi|24762455,gi|24762457	1	581
ILDANPVLEAFGNAK	CG5695-PA,CG5695-PB,CG5695-PC,CG5695-PD,CG5695-PE,CG5695-PF	2b	gi|45549229,gi|24649614,gi|62472813,gi|62472805,gi|62472797,gi|62472788	1	2
ILDTCSLPLTGK	CG1140-PA,CG1140-PB	2b	gi|21358325,gi|24655794	1	10
ILDVIR	CG4389-PA,CG4389-PB,CG4389-PC	2b	gi|19921000,gi|24583077,gi|24583079	0	210
ILLLAGAEPTVR	CG5848-PA,CG5848-PB,CG5848-PC,CG5848-PD	2b	gi|24584588,gi|17136840,gi|17136842,gi|45552397	1	3
ILNHVGDTVMR	CG32056-PA,CG32056-PB,CG32056-PC	2b	gi|85726470,gi|24662171,gi|24662167	1	8
ILSGMNVVR	CG2852-PA,CG2852-PB	2b	gi|20130249,gi|24658306	1	39
ILSTMLSEAIR	CG4389-PA,CG4389-PB,CG4389-PC	2b	gi|19921000,gi|24583077,gi|24583079	1	210
ILVHLLETSK	CG17332-PA,CG17332-PB,CG17332-PD	2b	gi|24584671,gi|24584673,gi|24584675	1	6
IMELEEELK	CG4843-PA,CG4843-PB,CG4843-PC	2b	gi|28571726,gi|24647095,gi|45551906	1	131
IMSWMQAWAR	CG17927-PA,CG17927-PB,CG17927-PC,CG17927-PD,CG17927-PE,CG17927-PF,CG17927-PG,CG17927-PH,CG17927-PI,CG17927-PJ,CG17927-PK,CG17927-PL,CG17927-PM	2b	gi|24584704,gi|24584710,gi|24584692,gi|24584702,gi|24584696,gi|24584700,gi|24584694,gi|28574239,gi|24584706,gi|24584698,gi|24584712,gi|24584714,gi|24584716	1	2330
INDLIESGVK	CG17896-PA,CG17896-PB	2b	gi|24638878,gi|24638876	1	16
INEAVAGNYYPITTK	CG6206-PA,CG6206-PB	2b	gi|19921088,gi|24583443	1	68
INELTTANVSLVSIK	CG5939-PA,CG5939-PB,CG5939-PC,CG5939-PD	2b	gi|24661112,gi|24661116,gi|24661120,gi|24661124	1	578
INGQPVPTAEYQDDR	CG32019-PA,CG32019-PC,CG32019-PD,CG32019-PE	2b	gi|28558739,gi|45552151,gi|45552153,gi|45552149	1	787
INHEDEDLDGDGVKNDEDEDLDGDGK	CG9297-PA,CG9297-PB	2b	gi|28571703,gi|28571705	1	40
INIEQISEGDPK	CG32019-PA,CG32019-PC,CG32019-PD,CG32019-PE	2b	gi|28558739,gi|45552151,gi|45552153,gi|45552149	0	787
INLDPFEIK	CG6214-PA,CG6214-PB,CG6214-PC,CG6214-PD,CG6214-PE,CG6214-PF,CG6214-PG,CG6214-PH,CG6214-PI,CG6214-PJ,CG6214-PK,CG6214-PL,CG6214-PM,CG6214-PN,CG6214-PO,CG6214-PP,CG6214-PQ	2b	gi|45550972,gi|24583969,gi|45552353,gi|45552351,gi|45552349,gi|45552347,gi|45552345,gi|45552343,gi|45552341,gi|45552339,gi|45552337,gi|45552335,gi|45552363,gi|45552361,gi|45552359,gi|45552357,gi|45552355	0	3
INSYQLPAALGLEPYR	CG3359-PB,CG3359-PC,CG3359-PD,CG3359-PE,CG3359-PF,CG3359-PG,CG3359-PH,CG3359-PI,CG3359-PJ,CG3359-PK,CG3359-PL,CG3359-PM,CG3359-PN,CG3359-PO,CG3359-PP	2b	gi|24646161,gi|24646163,gi|28573039,gi|28573041,gi|28573043,gi|28573045,gi|28573047,gi|28573049,gi|28573051,gi|28573053,gi|28573061,gi|28573055,gi|28573057,gi|28573059,gi|28573037	0	29
INTPQGDK	CG4217-PA,CG4217-PB	2b	gi|17738065,gi|24648444	0	11
IPFNVTPGSEQIR	CG9244-PB,CG9244-PC	2b	gi|17864292,gi|161076999	1	473
IPFSLDGPFIK	CG2139-PA,CG2139-PB,CG2139-PC,CG2139-PD	2b	gi|24651389,gi|45552009,gi|24651387,gi|24651391	1	61
IPLEQVPEDEK	CG4729-PA,CG4729-PB,CG4729-PC,CG4729-PD	2b	gi|24665282,gi|24665285,gi|24665289,gi|24665293	0	1
IPNLIENAEYEFR	CG32019-PA,CG32019-PC,CG32019-PD,CG32019-PE	2b	gi|28558739,gi|45552151,gi|45552153,gi|45552149	1	787
IPSFVGADK	CG14648-PA,CG14648-PB	2b	gi|21355167,gi|161078016	1	22
IPSVFSK	CG3395-PA,CG3395-PB,CG3395-PD	2b	gi|24661707,gi|24661715,gi|24661711	1	34
IPVGAETLGR	CG11154-PA,CG11154-PB	2b	gi|24638766,gi|24638768	1	585
IPVPYSNYR	CG6206-PA,CG6206-PB	2b	gi|19921088,gi|24583443	0	68
IPVTPSESFQK	CG5320-PA,CG5320-PB,CG5320-PE,CG5320-PF	2b	gi|45549226,gi|24649460,gi|45553473,gi|45553475	1	156
IQEKEEEFENTR	CG17927-PA,CG17927-PB,CG17927-PC,CG17927-PD,CG17927-PE,CG17927-PF,CG17927-PG,CG17927-PH,CG17927-PI,CG17927-PJ,CG17927-PK,CG17927-PL,CG17927-PM	2b	gi|24584704,gi|24584710,gi|24584692,gi|24584702,gi|24584696,gi|24584700,gi|24584694,gi|28574239,gi|24584706,gi|24584698,gi|24584712,gi|24584714,gi|24584716	1	2330
IQEKEEEFENTRK	CG17927-PA,CG17927-PB,CG17927-PC,CG17927-PD,CG17927-PE,CG17927-PF,CG17927-PG,CG17927-PH,CG17927-PI,CG17927-PJ,CG17927-PK,CG17927-PL,CG17927-PM	2b	gi|24584704,gi|24584710,gi|24584692,gi|24584702,gi|24584696,gi|24584700,gi|24584694,gi|28574239,gi|24584706,gi|24584698,gi|24584712,gi|24584714,gi|24584716	1	2330
IQEVIGQVLNQVNVNSLR	CG17285-PA,CG17285-PB	2b	gi|24664081,gi|24664085	1	257
IQGYQIEYR	CG32019-PA,CG32019-PC,CG32019-PD,CG32019-PE	2b	gi|28558739,gi|45552151,gi|45552153,gi|45552149	0	787
IQLLEEDLER	CG4898-PA,CG4898-PB,CG4898-PC,CG4898-PD,CG4898-PE,CG4898-PF,CG4898-PG,CG4898-PH,CG4898-PI,CG4898-PJ,CG4898-PK,CG4898-PL	2b	gi|24647089,gi|45551896,gi|24647085,gi|24647073,gi|45551900,gi|45551898,gi|24647075,gi|45551902,gi|45551904,gi|24647077,gi|45553377,gi|45553375	1	116
IQLLEEDLERSEER	CG4898-PA,CG4898-PB,CG4898-PC,CG4898-PD,CG4898-PE,CG4898-PF,CG4898-PG,CG4898-PH,CG4898-PI,CG4898-PJ,CG4898-PK,CG4898-PL	2b	gi|24647089,gi|45551896,gi|24647085,gi|24647073,gi|45551900,gi|45551898,gi|24647075,gi|45551902,gi|45551904,gi|24647077,gi|45553377,gi|45553375	1	116
IQNDISASGLK	CG3961-PA,CG3961-PB,CG3961-PC	2b	gi|24666497,gi|24666505,gi|24666501	0	20
IQQQIAAQQAYHDNLVR	CG17549-PA,CG17549-PB,CG17549-PC	2b	gi|28574364,gi|24585186,gi|24585188	0	17
IQSFVMDTDFVK	CG4389-PA,CG4389-PB,CG4389-PC	2b	gi|19921000,gi|24583077,gi|24583079	1	210
IQTWTENEGEEGLR	CG1634-PA,CG1634-PB,CG1634-PC	2b	gi|17530861,gi|24640619,gi|45554534	1	11
IQYGGSVTAANAK	CG2171-PA,CG2171-PB,CG2171-PC	2b	gi|28572004,gi|28572006,gi|28572008	1	22
IRDLELELEEEK	CG5939-PA,CG5939-PB,CG5939-PC,CG5939-PD	2b	gi|24661112,gi|24661116,gi|24661120,gi|24661124	1	578
IRGEAEAFAIAAK	CG8200-PA,CG8200-PB	2b	gi|17137546,gi|24653894	1	28
IRGEAEAFAIAAKAK	CG8200-PA,CG8200-PB	2b	gi|17137546,gi|24653894	0	28
IRPTDPTLSGNLEK	CG1771-PA,CG1771-PB	2b	gi|24641711,gi|24641709	1	3
ISATTTTSANPTQQNR	CG12162-PA,CG12162-PB	2b	gi|21356905,gi|24644238	1	2
ISDQQQVFGNNAK	CG33519-PB,CG33519-PC	2b	gi|161077453,gi|161077455	1	65
ISIIETVR	CG32019-PA,CG32019-PC,CG32019-PD,CG32019-PE	2b	gi|28558739,gi|45552151,gi|45552153,gi|45552149	0	787
ISILDIVPK	CG31692-PA,CG31692-PB	2b	gi|19921562,gi|45550998	1	1
ISLSFR	CG7107-PA,CG7107-PB,CG7107-PD,CG7107-PE,CG7107-PF,CG7107-PG	2b	gi|24641813,gi|24641811,gi|24641815,gi|62473677,gi|62473664,gi|62473654	0	236
ISLSVLER	CG4067-PA,CG4067-PB,CG4067-PC,CG4067-PD	2b	gi|17137370,gi|45551871,gi|24645718,gi|62472483	0	5
ISLTTQLEDTK	CG17927-PA,CG17927-PB,CG17927-PC,CG17927-PD,CG17927-PE,CG17927-PF,CG17927-PG,CG17927-PH,CG17927-PI,CG17927-PJ,CG17927-PK,CG17927-PL,CG17927-PM	2b	gi|24584704,gi|24584710,gi|24584692,gi|24584702,gi|24584696,gi|24584700,gi|24584694,gi|28574239,gi|24584706,gi|24584698,gi|24584712,gi|24584714,gi|24584716	1	2330
ISLTTQLEDTKR	CG17927-PA,CG17927-PB,CG17927-PC,CG17927-PD,CG17927-PE,CG17927-PF,CG17927-PG,CG17927-PH,CG17927-PI,CG17927-PJ,CG17927-PK,CG17927-PL,CG17927-PM	2b	gi|24584704,gi|24584710,gi|24584692,gi|24584702,gi|24584696,gi|24584700,gi|24584694,gi|28574239,gi|24584706,gi|24584698,gi|24584712,gi|24584714,gi|24584716	1	2330
ISPEELYQR	CG5670-PA,CG5670-PB,CG5670-PC,CG5670-PD,CG5670-PE,CG5670-PF,CG5670-PG,CG5670-PH	2b	gi|24648576,gi|24648578,gi|24648580,gi|24648582,gi|45553441,gi|45553439,gi|45553437,gi|45553435	1	209
ISSSGEHTVEEDAVCLK	CG33103-PA,CG33103-PB	2b	gi|28572036,gi|28572038	1	438
ITAAVMHMGGMK	CG17927-PA,CG17927-PB,CG17927-PC,CG17927-PD,CG17927-PE,CG17927-PF,CG17927-PG,CG17927-PH,CG17927-PI,CG17927-PJ,CG17927-PK,CG17927-PL,CG17927-PM	2b	gi|24584704,gi|24584710,gi|24584692,gi|24584702,gi|24584696,gi|24584700,gi|24584694,gi|28574239,gi|24584706,gi|24584698,gi|24584712,gi|24584714,gi|24584716	1	2330
ITALGENLDESLR	CG33484-PA,CG33484-PB,CG33484-PC,CG33484-PD	2b	gi|45580802,gi|116007758,gi|116007760,gi|116007762	0	226
ITDAVSPEKDVDGLHTVNEGR	CG4067-PA,CG4067-PB,CG4067-PC,CG4067-PD	2b	gi|17137370,gi|45551871,gi|24645718,gi|62472483	1	5
ITDIAYSQVVR	CG6512-PA,CG6512-PB	2b	gi|28574878,gi|24665814	1	3
ITDITCSAGETIK	CG33519-PB,CG33519-PC	2b	gi|161077453,gi|161077455	0	65
ITGEGRK	CG3937-PA,CG3937-PB,CG3937-PC,CG3937-PD	2b	gi|62484180,gi|24647611,gi|24647613,gi|45553391	0	1
ITHIYSTTLR	CG3725-PA,CG3725-PB,CG3725-PC,CG3725-PD,CG3725-PE,CG3725-PF,CG3725-PG,CG3725-PH	2b	gi|17136664,gi|24762445,gi|24762447,gi|24762449,gi|24762451,gi|24762453,gi|24762455,gi|24762457	1	581
ITIQSDGDPIDHDK	CG11949-PA,CG11949-PB,CG11949-PC,CG11949-PD	2b	gi|24655527,gi|24655522,gi|24655517,gi|24655532	1	43
ITLAEVNPSLCDQK	CG33103-PA,CG33103-PB	2b	gi|28572036,gi|28572038	1	438
ITMVSSGTGDIGAAK	CG8200-PA,CG8200-PB	2b	gi|17137546,gi|24653894	1	28
ITSENPDEGFKPSSGTVQELNFR	CG11198-PA,CG11198-PB,CG11198-PC,CG11198-PD	2b	gi|24586458,gi|24586460,gi|161076407,gi|161076409	1	52
ITSGNDVTNLLSKSSR	CG30015-PA,CG30015-PB,CG30015-PC,CG30015-PD	2b	gi|24652565,gi|24652567,gi|161076518,gi|161076520	0	1
ITTGTAEFAAPEIVNR	CG32019-PA,CG32019-PC,CG32019-PD,CG32019-PE	2b	gi|28558739,gi|45552151,gi|45552153,gi|45552149	1	787
ITTQGPGLLER	CG33950-PA,CG33950-PB,CG33950-PC,CG33950-PD,CG33950-PE,CG33950-PF,CG33950-PG	2b	gi|78706472,gi|78706470,gi|78706464,gi|78706466,gi|78706468,gi|78706474,gi|161077537	0	871
ITTQSDSELGVFK	CG33484-PA,CG33484-PB,CG33484-PC,CG33484-PD	2b	gi|45580802,gi|116007758,gi|116007760,gi|116007762	0	226
IVEFESQNPGEASK	CG3991-PA,CG3991-PD	2b	gi|17137360,gi|24653270	1	3
IVEQPTQVTQTVPVQTAHYYQR	CG15825-PA,CG15825-PB	2b	gi|24585183,gi|20129625	1	86
IVGANAAALPEFEER	CG9042-PA,CG9042-PB,CG9042-PC	2b	gi|17136204,gi|17136200,gi|17136202	1	16
IVICGEFDGK	CG33103-PA,CG33103-PB	2b	gi|28572036,gi|28572038	0	438
IVPIVEPEVLPDGDHDLDR	CG6058-PA,CG6058-PB,CG6058-PC,CG6058-PD,CG6058-PE,CG6058-PF,CG6058-PG,CG6058-PH	2b	gi|45551983,gi|24650278,gi|24650280,gi|24650282,gi|24650288,gi|24650276,gi|45551985,gi|45553577	1	57
IVQAEGEAEAAK	CG15081-PA,CG15081-PB,CG15081-PC,CG15081-PD,CG15081-PE,CG15081-PF	2b	gi|161077238,gi|161077236,gi|161077234,gi|161077240,gi|161077242,gi|161077244	1	25
IVSTPQQVVYTIPGGSQR	CG15825-PA,CG15825-PB	2b	gi|24585183,gi|20129625	1	86
IYENAVKPLETLYK	CG9297-PA,CG9297-PB	2b	gi|28571703,gi|28571705	1	40
KADQEISGLK	CG17927-PA,CG17927-PB,CG17927-PC,CG17927-PD,CG17927-PE,CG17927-PF,CG17927-PG,CG17927-PH,CG17927-PI,CG17927-PJ,CG17927-PK,CG17927-PL,CG17927-PM	2b	gi|24584704,gi|24584710,gi|24584692,gi|24584702,gi|24584696,gi|24584700,gi|24584694,gi|28574239,gi|24584706,gi|24584698,gi|24584712,gi|24584714,gi|24584716	1	2330
KADQEISGLKK	CG17927-PA,CG17927-PB,CG17927-PC,CG17927-PD,CG17927-PE,CG17927-PF,CG17927-PG,CG17927-PH,CG17927-PI,CG17927-PJ,CG17927-PK,CG17927-PL,CG17927-PM	2b	gi|24584704,gi|24584710,gi|24584692,gi|24584702,gi|24584696,gi|24584700,gi|24584694,gi|28574239,gi|24584706,gi|24584698,gi|24584712,gi|24584714,gi|24584716	1	2330
KAEAEMAYELQAAK	CG8200-PA,CG8200-PB	2b	gi|17137546,gi|24653894	1	28
KAEECVQCFCFGVAK	CG33950-PA,CG33950-PB,CG33950-PC,CG33950-PD,CG33950-PE,CG33950-PF,CG33950-PG	2b	gi|78706472,gi|78706470,gi|78706464,gi|78706466,gi|78706468,gi|78706474,gi|161077537	0	871
KAEELHAAEVK	CG17927-PA,CG17927-PB,CG17927-PC,CG17927-PD,CG17927-PE,CG17927-PF,CG17927-PG,CG17927-PH,CG17927-PI,CG17927-PJ,CG17927-PK,CG17927-PL,CG17927-PM	2b	gi|24584704,gi|24584710,gi|24584692,gi|24584702,gi|24584696,gi|24584700,gi|24584694,gi|28574239,gi|24584706,gi|24584698,gi|24584712,gi|24584714,gi|24584716	1	2330
KAEIGIAMGSGTAVAK	CG3725-PA,CG3725-PB,CG3725-PC,CG3725-PD,CG3725-PE,CG3725-PF,CG3725-PG,CG3725-PH	2b	gi|17136664,gi|24762445,gi|24762447,gi|24762449,gi|24762451,gi|24762453,gi|24762455,gi|24762457	1	581
KAGTAIDNIEEDFR	CG4376-PA,CG4376-PB,CG4376-PC	2b	gi|24639238,gi|24639240,gi|17137758	1	241
KALEQQIK	CG17927-PA,CG17927-PB,CG17927-PC,CG17927-PD,CG17927-PE,CG17927-PF,CG17927-PG,CG17927-PH,CG17927-PI,CG17927-PJ,CG17927-PK,CG17927-PL,CG17927-PM	2b	gi|24584704,gi|24584710,gi|24584692,gi|24584702,gi|24584696,gi|24584700,gi|24584694,gi|28574239,gi|24584706,gi|24584698,gi|24584712,gi|24584714,gi|24584716	0	2330
KAQQELEEAEER	CG17927-PA,CG17927-PB,CG17927-PC,CG17927-PD,CG17927-PE,CG17927-PF,CG17927-PG,CG17927-PH,CG17927-PI,CG17927-PJ,CG17927-PK,CG17927-PL,CG17927-PM	2b	gi|24584704,gi|24584710,gi|24584692,gi|24584702,gi|24584696,gi|24584700,gi|24584694,gi|28574239,gi|24584706,gi|24584698,gi|24584712,gi|24584714,gi|24584716	1	2330
KATEVIYK	CG16944-PA,CG16944-PB,CG16944-PC,CG16944-PD	2b	gi|18079273,gi|24641095,gi|24641090,gi|24641092	1	349
KCNETLDTQQK	CG17927-PA,CG17927-PB,CG17927-PC,CG17927-PD,CG17927-PE,CG17927-PF,CG17927-PG,CG17927-PH,CG17927-PI,CG17927-PJ,CG17927-PK,CG17927-PL,CG17927-PM	2b	gi|24584704,gi|24584710,gi|24584692,gi|24584702,gi|24584696,gi|24584700,gi|24584694,gi|28574239,gi|24584706,gi|24584698,gi|24584712,gi|24584714,gi|24584716	1	2330
KDEVFTGSK	CG32019-PA,CG32019-PC,CG32019-PD,CG32019-PE	2b	gi|28558739,gi|45552151,gi|45552153,gi|45552149	0	787
KEAPPNEKPEIVK	CG8332-PA,CG8332-PB	2b	gi|19922390,gi|24654191	1	6
KELEALNAK	CG17927-PA,CG17927-PB,CG17927-PC,CG17927-PD,CG17927-PE,CG17927-PF,CG17927-PG,CG17927-PH,CG17927-PI,CG17927-PJ,CG17927-PK,CG17927-PL,CG17927-PM	2b	gi|24584704,gi|24584710,gi|24584692,gi|24584702,gi|24584696,gi|24584700,gi|24584694,gi|28574239,gi|24584706,gi|24584698,gi|24584712,gi|24584714,gi|24584716	0	2330
KENIAAGQNELLK	CG6058-PA,CG6058-PB,CG6058-PC,CG6058-PD,CG6058-PE,CG6058-PF,CG6058-PG,CG6058-PH	2b	gi|45551983,gi|24650278,gi|24650280,gi|24650282,gi|24650288,gi|24650276,gi|45551985,gi|45553577	1	57
KESTVGEIVNLMAVDAQR	CG6214-PA,CG6214-PB,CG6214-PC,CG6214-PD,CG6214-PE,CG6214-PF,CG6214-PG,CG6214-PH,CG6214-PI,CG6214-PJ,CG6214-PK,CG6214-PL,CG6214-PM,CG6214-PN,CG6214-PO,CG6214-PP,CG6214-PQ	2b	gi|45550972,gi|24583969,gi|45552353,gi|45552351,gi|45552349,gi|45552347,gi|45552345,gi|45552343,gi|45552341,gi|45552339,gi|45552337,gi|45552335,gi|45552363,gi|45552361,gi|45552359,gi|45552357,gi|45552355	0	3
KEVDEATAFAK	CG7010-PA,CG7010-PB,CG7010-PC,CG7010-PD	2b	gi|28571106,gi|24639746,gi|24639740,gi|24639744	1	33
KEVSGDASEAALLK	CG5670-PA,CG5670-PB,CG5670-PC,CG5670-PD,CG5670-PE,CG5670-PF,CG5670-PG,CG5670-PH	2b	gi|24648576,gi|24648578,gi|24648580,gi|24648582,gi|45553441,gi|45553439,gi|45553437,gi|45553435	1	209
KFAAVAAAEDGAATAEK	CG9325-PA,CG9325-PB,CG9325-PC,CG9325-PD,CG9325-PE,CG9325-PF	2b	gi|17136738,gi|24655667,gi|24655690,gi|24655685,gi|24655672,gi|24655677	1	30
KGFMTPER	CG7178-PA,CG7178-PB,CG7178-PC,CG7178-PD,CG7178-PE,CG7178-PF,CG7178-PG	2b	gi|24642961,gi|24642959,gi|17737363,gi|24642955,gi|24642957,gi|24642953,gi|24642963	0	39
KGGGFATVSSAYK	CG17927-PA,CG17927-PB,CG17927-PC,CG17927-PD,CG17927-PE,CG17927-PF,CG17927-PG,CG17927-PH,CG17927-PI,CG17927-PJ,CG17927-PK,CG17927-PL,CG17927-PM	2b	gi|24584704,gi|24584710,gi|24584692,gi|24584702,gi|24584696,gi|24584700,gi|24584694,gi|28574239,gi|24584706,gi|24584698,gi|24584712,gi|24584714,gi|24584716	1	2330
KGLDPEALTGK	CG7107-PA,CG7107-PB,CG7107-PD,CG7107-PE,CG7107-PF,CG7107-PG	2b	gi|24641813,gi|24641811,gi|24641815,gi|62473677,gi|62473664,gi|62473654	1	236
KGSQPVAPPEPEAVIEEVNAK	CG9432-PA,CG9432-PB,CG9432-PD,CG9432-PE	2b	gi|24586060,gi|24586058,gi|116007558,gi|116007556	1	102
KHNDAVAEMAEQVDQLNK	CG17927-PA,CG17927-PB,CG17927-PC,CG17927-PD,CG17927-PE,CG17927-PF,CG17927-PG,CG17927-PH,CG17927-PI,CG17927-PJ,CG17927-PK,CG17927-PL,CG17927-PM	2b	gi|24584704,gi|24584710,gi|24584692,gi|24584702,gi|24584696,gi|24584700,gi|24584694,gi|28574239,gi|24584706,gi|24584698,gi|24584712,gi|24584714,gi|24584716	1	2330
KIDSDLEGHPTPR	CG8036-PB,CG8036-PC,CG8036-PD	2b	gi|45550715,gi|45551847,gi|24645119	1	18
KLAFVEDELEVAEDR	CG4843-PA,CG4843-PB,CG4843-PC	2b	gi|28571726,gi|24647095,gi|45551906	1	131
KLDTVINAYK	CG4307-PA,CG4307-PB	2b	gi|24647054,gi|24647056	1	64
KLEADINELEIALDHANK	CG17927-PA,CG17927-PB,CG17927-PC,CG17927-PD,CG17927-PE,CG17927-PF,CG17927-PG,CG17927-PH,CG17927-PI,CG17927-PJ,CG17927-PK,CG17927-PL,CG17927-PM	2b	gi|24584704,gi|24584710,gi|24584692,gi|24584702,gi|24584696,gi|24584700,gi|24584694,gi|28574239,gi|24584706,gi|24584698,gi|24584712,gi|24584714,gi|24584716	1	2330
KLPDTEELKL	CG5044-PA,CG5044-PB	2b	gi|28571729,gi|28571730	1	2
KLPEAGTDER	CG14648-PA,CG14648-PB	2b	gi|21355167,gi|161078016	1	22
KLSIENSDLLR	CG17927-PA,CG17927-PB,CG17927-PC,CG17927-PD,CG17927-PE,CG17927-PF,CG17927-PG,CG17927-PH,CG17927-PI,CG17927-PJ,CG17927-PK,CG17927-PL,CG17927-PM	2b	gi|24584704,gi|24584710,gi|24584692,gi|24584702,gi|24584696,gi|24584700,gi|24584694,gi|28574239,gi|24584706,gi|24584698,gi|24584712,gi|24584714,gi|24584716	0	2330
KLTEIINETHENVK	CG9042-PA,CG9042-PB,CG9042-PC	2b	gi|17136204,gi|17136200,gi|17136202	1	16
KMEDVEESFQR	CG1516-PA,CG1516-PB,CG1516-PD,CG1516-PE,CG1516-PG,CG1516-PI,CG1516-PJ,CG1516-PK,CG1516-PL	2b	gi|24652210,gi|24652212,gi|24652214,gi|19921944,gi|24652216,gi|24652218,gi|24652220,gi|24652222,gi|24652224	1	469
KMEEEMAK	CG14207-PA,CG14207-PB	2b	gi|19920346,gi|24643312	0	22
KPADFHQVPQSQLQR	CG33950-PA,CG33950-PB,CG33950-PC,CG33950-PD,CG33950-PE,CG33950-PF,CG33950-PG	2b	gi|78706472,gi|78706470,gi|78706464,gi|78706466,gi|78706468,gi|78706474,gi|161077537	1	871
KPEDDGGVPIK	CG32019-PA,CG32019-PC,CG32019-PD,CG32019-PE	2b	gi|28558739,gi|45552151,gi|45552153,gi|45552149	0	787
KPIPEDTALLNSSSVNE	CG1275-PA,CG1275-PB,CG1275-PC,CG1275-PD	2b	gi|24655942,gi|21358209,gi|24655937,gi|45552873	1	2
KPYGRTKPLISR	CG2165-PA,CG2165-PB,CG2165-PC,CG2165-PD,CG2165-PE	2b	gi|62484399,gi|62484401,gi|62473120,gi|62473111,gi|62473099	0	35
KQQELNK	CG32030-PA,CG32030-PB	2b	gi|24661140,gi|24661144	0	1
KQQNIQNVLGQK	CG17285-PA,CG17285-PB	2b	gi|24664081,gi|24664085	1	257
KSCSFSEFGCCPDAETSAK	CG33103-PA,CG33103-PB	2b	gi|28572036,gi|28572038	0	438
KSDDPQPDDEPEAEEESDER	CG11958-PA,CG11958-PB,CG11958-PC,CG11958-PD	2b	gi|24651030,gi|17137190,gi|116008116,gi|116008118	1	4
KSQVVPSVANTYSVEIK	CG33950-PA,CG33950-PB,CG33950-PC,CG33950-PD,CG33950-PE,CG33950-PF,CG33950-PG	2b	gi|78706472,gi|78706470,gi|78706464,gi|78706466,gi|78706468,gi|78706474,gi|161077537	0	871
KVAGGTQTLPNDMNK	CG34343-PB,CG34343-PC,CG34343-PD	2b	gi|161076968,gi|45552415,gi|161076970	1	2
KVEIVDSLGAR	CG12908-PA,CG12908-PB	2b	gi|24652408,gi|45552547	1	41
KVEPLAINVDK	CG18076-PA,CG18076-PB,CG18076-PC,CG18076-PE,CG18076-PG,CG18076-PH	2b	gi|24653493,gi|24653489,gi|24653495,gi|24653491,gi|24653487,gi|24653497	1	5
KVQQIEEDLEK	CG4843-PA,CG4843-PB,CG4843-PC	2b	gi|28571726,gi|24647095,gi|45551906	1	131
KVQQIEEDLEKSEER	CG4843-PA,CG4843-PB,CG4843-PC	2b	gi|28571726,gi|24647095,gi|45551906	1	131
KVTTTASAPQLVQPVASSR	CG15825-PA,CG15825-PB	2b	gi|24585183,gi|20129625	1	86
LAEAEETIESLNQK	CG17927-PA,CG17927-PB,CG17927-PC,CG17927-PD,CG17927-PE,CG17927-PF,CG17927-PG,CG17927-PH,CG17927-PI,CG17927-PJ,CG17927-PK,CG17927-PL,CG17927-PM	2b	gi|24584704,gi|24584710,gi|24584692,gi|24584702,gi|24584696,gi|24584700,gi|24584694,gi|28574239,gi|24584706,gi|24584698,gi|24584712,gi|24584714,gi|24584716	1	2330
LAEQAER	CG31196-PA,CG31196-PB,CG31196-PC,CG31196-PD	2b	gi|24647885,gi|24647887,gi|24647891,gi|24647889	1	30
LAGADIETYLLEK	CG17927-PA,CG17927-PB,CG17927-PC,CG17927-PD,CG17927-PE,CG17927-PF,CG17927-PG,CG17927-PH,CG17927-PI,CG17927-PJ,CG17927-PK,CG17927-PL,CG17927-PM	2b	gi|24584704,gi|24584710,gi|24584692,gi|24584702,gi|24584696,gi|24584700,gi|24584694,gi|28574239,gi|24584706,gi|24584698,gi|24584712,gi|24584714,gi|24584716	1	2330
LAGLNGELEEVR	CG5939-PA,CG5939-PB,CG5939-PC,CG5939-PD	2b	gi|24661112,gi|24661116,gi|24661120,gi|24661124	1	578
LALDSIAK	CG2168-PA,CG2168-PB,CG2168-PD	2b	gi|17864162,gi|24638499,gi|24638501	1	33
LASQTVLGAGHMVR	CG5840-PA,CG5840-PB	2b	gi|21358587,gi|24647700	1	28
LATVNEHNK	CG3566-PB,CG3566-PC	2b	gi|45549316,gi|45554235	1	10
LAVVANPSHLEAVDPVVQGK	CG11661-PA,CG11661-PB,CG11661-PC,CG11661-PE,CG11661-PF,CG11661-PG,CG11661-PH,CG11661-PI	2b	gi|24665669,gi|24665673,gi|24665677,gi|28574585,gi|28574590,gi|28574592,gi|161084450,gi|161084461	1	218
LAYESPVIDAK	CG11958-PA,CG11958-PB,CG11958-PC,CG11958-PD	2b	gi|24651030,gi|17137190,gi|116008116,gi|116008118	1	4
LCVSLVQGNR	CG5730-PA,CG5730-PB,CG5730-PC,CG5730-PD	2b	gi|17136266,gi|17136264,gi|45553447,gi|45553445	1	61
LDAGAVQCLAR	CG1915-PA,CG1915-PC	2b	gi|24655827,gi|161080703	0	363
LDANITGEPAPK	CG32019-PA,CG32019-PC,CG32019-PD,CG32019-PE	2b	gi|28558739,gi|45552151,gi|45552153,gi|45552149	1	787
LDDVINR	CG6028-PA,CG6028-PB	2b	gi|28572127,gi|24648881	0	3
LDEAEANALK	CG17927-PA,CG17927-PB,CG17927-PC,CG17927-PD,CG17927-PE,CG17927-PF,CG17927-PG,CG17927-PH,CG17927-PI,CG17927-PJ,CG17927-PK,CG17927-PL,CG17927-PM	2b	gi|24584704,gi|24584710,gi|24584692,gi|24584702,gi|24584696,gi|24584700,gi|24584694,gi|28574239,gi|24584706,gi|24584698,gi|24584712,gi|24584714,gi|24584716	1	2330
LDEFGEQLSK	CG3725-PA,CG3725-PB,CG3725-PC,CG3725-PD,CG3725-PE,CG3725-PF,CG3725-PG,CG3725-PH	2b	gi|17136664,gi|24762445,gi|24762447,gi|24762449,gi|24762451,gi|24762453,gi|24762455,gi|24762457	1	581
LDEFLPIYSQVK	CG5596-PA,CG5596-PB	2b	gi|17136338,gi|17136340	1	40
LDFNPLTDELTGADGK	CG9244-PB,CG9244-PC	2b	gi|17864292,gi|161076999	1	473
LDFNPLTDELTGADGKK	CG9244-PB,CG9244-PC	2b	gi|17864292,gi|161076999	1	473
LDGSQLVK	CG1883-PA,CG1883-PB,CG1883-PC,CG1883-PD	2b	gi|21358459,gi|24651339,gi|24651337,gi|45553763	0	25
LDISDEFR	CG6148-PA,CG6148-PB	2b	gi|24646379,gi|24646381	1	16
LDKEIK	CG8479-PA,CG8479-PB	2b	gi|24653584,gi|19922232	0	3
LDNNEPLK	CG7176-PA,CG7176-PB,CG7176-PC,CG7176-PD,CG7176-PE,CG7176-PF,CG7176-PG	2b	gi|24660860,gi|24660849,gi|21356561,gi|24660856,gi|24660864,gi|24660868,gi|28574947	1	35
LDQELK	CG3395-PA,CG3395-PB,CG3395-PD	2b	gi|24661707,gi|24661715,gi|24661711	0	34
LDQLIYIPLPDDK	CG2331-PA,CG2331-PB,CG2331-PC,CG2331-PD	2b	gi|17137560,gi|24652279,gi|161076486,gi|161076488	1	19
LDRPIAYVDQTLVK	CG9057-PA,CG9057-PB,CG9057-PC	2b	gi|18859967,gi|116007162,gi|116007164	1	9
LDTVINAYK	CG4307-PA,CG4307-PB	2b	gi|24647054,gi|24647056	1	64
LDTYDILNR	CG6455-PA,CG6455-PB	2b	gi|45549224,gi|24648875	1	49
LDVGPETEAILDQLK	CG9297-PA,CG9297-PB	2b	gi|28571703,gi|28571705	1	40
LDYQDKDER	CG6206-PA,CG6206-PB	2b	gi|19921088,gi|24583443	0	68
LDYQVECR	CG8189-PA,CG8189-PB	2b	gi|24661884,gi|24661888	0	47
LDYVLGLK	CG3395-PA,CG3395-PB,CG3395-PD	2b	gi|24661707,gi|24661715,gi|24661711	1	34
LEADINELEIALDHANK	CG17927-PA,CG17927-PB,CG17927-PC,CG17927-PD,CG17927-PE,CG17927-PF,CG17927-PG,CG17927-PH,CG17927-PI,CG17927-PJ,CG17927-PK,CG17927-PL,CG17927-PM	2b	gi|24584704,gi|24584710,gi|24584692,gi|24584702,gi|24584696,gi|24584700,gi|24584694,gi|28574239,gi|24584706,gi|24584698,gi|24584712,gi|24584714,gi|24584716	1	2330
LEAQVTGFPAPEVK	CG33519-PB,CG33519-PC	2b	gi|161077453,gi|161077455	0	65
LEDEQVVVLK	CG17927-PA,CG17927-PB,CG17927-PC,CG17927-PD,CG17927-PE,CG17927-PF,CG17927-PG,CG17927-PH,CG17927-PI,CG17927-PJ,CG17927-PK,CG17927-PL,CG17927-PM	2b	gi|24584704,gi|24584710,gi|24584692,gi|24584702,gi|24584696,gi|24584700,gi|24584694,gi|28574239,gi|24584706,gi|24584698,gi|24584712,gi|24584714,gi|24584716	1	2330
LEEAGGATSAQIELNK	CG17927-PA,CG17927-PB,CG17927-PC,CG17927-PD,CG17927-PE,CG17927-PF,CG17927-PG,CG17927-PH,CG17927-PI,CG17927-PJ,CG17927-PK,CG17927-PL,CG17927-PM	2b	gi|24584704,gi|24584710,gi|24584692,gi|24584702,gi|24584696,gi|24584700,gi|24584694,gi|28574239,gi|24584706,gi|24584698,gi|24584712,gi|24584714,gi|24584716	1	2330
LEEAGGATSAQIELNKK	CG17927-PA,CG17927-PB,CG17927-PC,CG17927-PD,CG17927-PE,CG17927-PF,CG17927-PG,CG17927-PH,CG17927-PI,CG17927-PJ,CG17927-PK,CG17927-PL,CG17927-PM	2b	gi|24584704,gi|24584710,gi|24584692,gi|24584702,gi|24584696,gi|24584700,gi|24584694,gi|28574239,gi|24584706,gi|24584698,gi|24584712,gi|24584714,gi|24584716	1	2330
LEELGANR	CG11567-PA,CG11567-PB	2b	gi|17137192,gi|24582192	0	177
LEEVAAK	CG32031-PA,CG32031-PB,CG32031-PC,CG32031-PD,CG32031-PE,CG32031-PF	2b	gi|24661336,gi|24661340,gi|24661344,gi|24661348,gi|161082598,gi|161082600	0	143
LEEVELNAVAGSK	CG5939-PA,CG5939-PB,CG5939-PC,CG5939-PD	2b	gi|24661112,gi|24661116,gi|24661120,gi|24661124	1	578
LEHPGGEESLVDEAGR	CG3566-PB,CG3566-PC	2b	gi|45549316,gi|45554235	1	10
LEIAEAFK	CG5730-PA,CG5730-PB,CG5730-PC,CG5730-PD	2b	gi|17136266,gi|17136264,gi|45553447,gi|45553445	1	61
LEINDVEESDK	CG32019-PA,CG32019-PC,CG32019-PD,CG32019-PE	2b	gi|28558739,gi|45552151,gi|45552153,gi|45552149	0	787
LEINSCQPNDSGAYK	CG33519-PB,CG33519-PC	2b	gi|161077453,gi|161077455	1	65
LEKDNAIDKADTCENQAK	CG4843-PA,CG4843-PB,CG4843-PC	2b	gi|28571726,gi|24647095,gi|45551906	1	131
LELLDPQLEDSGLYK	CG32019-PA,CG32019-PC,CG32019-PD,CG32019-PE	2b	gi|28558739,gi|45552151,gi|45552153,gi|45552149	1	787
LENDDSNYNIDMESYR	CG32019-PA,CG32019-PC,CG32019-PD,CG32019-PE	2b	gi|28558739,gi|45552151,gi|45552153,gi|45552149	1	787
LENPLPIPLHK	CG7356-PA,CG7356-PB	2b	gi|24582657,gi|24582659	0	19
LEPQTVEEGDPAR	CG1915-PA,CG1915-PC	2b	gi|24655827,gi|161080703	1	363
LEQELSVVASDYEEVSK	CG5939-PA,CG5939-PB,CG5939-PC,CG5939-PD	2b	gi|24661112,gi|24661116,gi|24661120,gi|24661124	1	578
LEQTLDELEDSLER	CG17927-PA,CG17927-PB,CG17927-PC,CG17927-PD,CG17927-PE,CG17927-PF,CG17927-PG,CG17927-PH,CG17927-PI,CG17927-PJ,CG17927-PK,CG17927-PL,CG17927-PM	2b	gi|24584704,gi|24584710,gi|24584692,gi|24584702,gi|24584696,gi|24584700,gi|24584694,gi|28574239,gi|24584706,gi|24584698,gi|24584712,gi|24584714,gi|24584716	1	2330
LETAAGNLYK	CG7010-PA,CG7010-PB,CG7010-PC,CG7010-PD	2b	gi|28571106,gi|24639746,gi|24639740,gi|24639744	1	33
LETAPFDPR	CG14235-PA,CG14235-PB,CG14235-PC	2b	gi|24643375,gi|24643377,gi|24643379	1	12
LETEKYDLEER	CG7107-PA,CG7107-PB,CG7107-PD,CG7107-PE,CG7107-PF,CG7107-PG	2b	gi|24641813,gi|24641811,gi|24641815,gi|62473677,gi|62473664,gi|62473654	1	236
LETNFNTLQTK	CG4376-PA,CG4376-PB,CG4376-PC	2b	gi|24639238,gi|24639240,gi|17137758	1	241
LETSEQTTGR	CG7378-PA,CG7378-PB	2b	gi|24643158,gi|161077949	0	1
LEVQSLDLVDAGEYK	CG33519-PB,CG33519-PC	2b	gi|161077453,gi|161077455	1	65
LFEDEEQDLFR	CG6148-PA,CG6148-PB	2b	gi|24646379,gi|24646381	1	16
LFEGGWDEISK	CG7107-PA,CG7107-PB,CG7107-PD,CG7107-PE,CG7107-PF,CG7107-PG	2b	gi|24641813,gi|24641811,gi|24641815,gi|62473677,gi|62473664,gi|62473654	1	236
LFEGGWDEISKDSNEK	CG7107-PA,CG7107-PB,CG7107-PD,CG7107-PE,CG7107-PF,CG7107-PG	2b	gi|24641813,gi|24641811,gi|24641815,gi|62473677,gi|62473664,gi|62473654	1	236
LFQGNALLR	CG3395-PA,CG3395-PB,CG3395-PD	2b	gi|24661707,gi|24661715,gi|24661711	1	34
LFYVDFGGTQPK	CG2139-PA,CG2139-PB,CG2139-PC,CG2139-PD	2b	gi|24651389,gi|45552009,gi|24651387,gi|24651391	1	61
LGEAQQQATMIVETR	CG1915-PA,CG1915-PC	2b	gi|24655827,gi|161080703	0	363
LGFLTFCPTNLGTTIR	CG32031-PA,CG32031-PB,CG32031-PC,CG32031-PD,CG32031-PE,CG32031-PF	2b	gi|24661336,gi|24661340,gi|24661344,gi|24661348,gi|161082598,gi|161082600	1	143
LGGIQSDIYSEGLHVR	CG15081-PA,CG15081-PB,CG15081-PC,CG15081-PD,CG15081-PE,CG15081-PF	2b	gi|161077238,gi|161077236,gi|161077234,gi|161077240,gi|161077242,gi|161077244	1	25
LGIDLGK	CG6767-PA,CG6767-PB	2b	gi|21355239,gi|45551540	0	5
LGLFYGNK	CG4260-PA,CG4260-PB	2b	gi|28574818,gi|45552169	1	35
LGLPEVMLGLLPGGGGTVR	CG4389-PA,CG4389-PB,CG4389-PC	2b	gi|19921000,gi|24583077,gi|24583079	1	210
LGSIQTSAQLK	CG1915-PA,CG1915-PC	2b	gi|24655827,gi|161080703	0	363
LGVEFDEETLDGR	CG6783-PA,CG6783-PB,CG6783-PC	2b	gi|78706756,gi|78706754,gi|78706752	1	10
LGYEHPVAIALDTK	CG7070-PA,CG7070-PB	2b	gi|28571814,gi|24648964	1	38
LGYLDSTAR	CG33950-PA,CG33950-PB,CG33950-PC,CG33950-PD,CG33950-PE,CG33950-PF,CG33950-PG	2b	gi|78706472,gi|78706470,gi|78706464,gi|78706466,gi|78706468,gi|78706474,gi|161077537	0	871
LIAEGTVTAEEVK	CG11661-PA,CG11661-PB,CG11661-PC,CG11661-PE,CG11661-PF,CG11661-PG,CG11661-PH,CG11661-PI	2b	gi|24665669,gi|24665673,gi|24665677,gi|28574585,gi|28574590,gi|28574592,gi|161084450,gi|161084461	1	218
LIAVTNEIESQYK	CG13284-PA,CG13284-PB	2b	gi|24584744,gi|28574402	1	1
LIDFGLATR	CG32019-PA,CG32019-PC,CG32019-PD,CG32019-PE	2b	gi|28558739,gi|45552151,gi|45552153,gi|45552149	1	787
LIEGSDAVFTAR	CG1915-PA,CG1915-PC	2b	gi|24655827,gi|161080703	1	363
LIEMSQADEVSGGQEQPK	CG15096-PA,CG15096-PB	2b	gi|20130135,gi|24655271	1	11
LIFDNLK	CG5670-PA,CG5670-PB,CG5670-PC,CG5670-PD,CG5670-PE,CG5670-PF,CG5670-PG,CG5670-PH	2b	gi|24648576,gi|24648578,gi|24648580,gi|24648582,gi|45553441,gi|45553439,gi|45553437,gi|45553435	0	209
LIFDSPR	CG33950-PA,CG33950-PB,CG33950-PC,CG33950-PD,CG33950-PE,CG33950-PF,CG33950-PG	2b	gi|78706472,gi|78706470,gi|78706464,gi|78706466,gi|78706468,gi|78706474,gi|161077537	0	871
LIGMSPEER	CG13240-PA,CG13240-PB	2b	gi|19921400,gi|24584480	0	25
LILNNVSGDDK	CG33484-PA,CG33484-PB,CG33484-PC,CG33484-PD	2b	gi|45580802,gi|116007758,gi|116007760,gi|116007762	0	226
LINCGQTCIAPDYILCSK	CG11140-PA,CG11140-PB,CG11140-PC,CG11140-PD,CG11140-PE,CG11140-PF,CG11140-PG,CG11140-PH,CG11140-PI	2b	gi|24586252,gi|24586254,gi|24586256,gi|24586258,gi|45552499,gi|45551030,gi|45551031,gi|45550376,gi|24586250	1	23
LITEEASKR	CG12233-PA,CG12233-PB	2b	gi|24643268,gi|24643270	1	132
LITPVVLQR	CG10944-PA,CG10944-PB,CG10944-PC	2b	gi|24640437,gi|17737290,gi|24640435	1	25
LITQLAK	CG10097-PA,CG10097-PB	2b	gi|24646271,gi|78706758	0	80
LIWSRPDGNENQEEYNVR	CG33950-PA,CG33950-PB,CG33950-PC,CG33950-PD,CG33950-PE,CG33950-PF,CG33950-PG	2b	gi|78706472,gi|78706470,gi|78706464,gi|78706466,gi|78706468,gi|78706474,gi|161077537	1	871
LKAPFGDELPAK	CG9244-PB,CG9244-PC	2b	gi|17864292,gi|161076999	1	473
LKGAYEEGQEQLEAVR	CG17927-PA,CG17927-PB,CG17927-PC,CG17927-PD,CG17927-PE,CG17927-PF,CG17927-PG,CG17927-PH,CG17927-PI,CG17927-PJ,CG17927-PK,CG17927-PL,CG17927-PM	2b	gi|24584704,gi|24584710,gi|24584692,gi|24584702,gi|24584696,gi|24584700,gi|24584694,gi|28574239,gi|24584706,gi|24584698,gi|24584712,gi|24584714,gi|24584716	1	2330
LKVDDLAAELDASQK	CG17927-PA,CG17927-PB,CG17927-PC,CG17927-PD,CG17927-PE,CG17927-PF,CG17927-PG,CG17927-PH,CG17927-PI,CG17927-PJ,CG17927-PK,CG17927-PL,CG17927-PM	2b	gi|24584704,gi|24584710,gi|24584692,gi|24584702,gi|24584696,gi|24584700,gi|24584694,gi|28574239,gi|24584706,gi|24584698,gi|24584712,gi|24584714,gi|24584716	1	2330
LLAELNK	CG6803-PA,CG6803-PB,CG6803-PC,CG6803-PD,CG6803-PE	2b	gi|24646989,gi|21357797,gi|24646991,gi|24646986,gi|24646984	1	71
LLANELEPYIK	CG8983-PA,CG8983-PB	2b	gi|45551086,gi|19922048	1	72
LLANIADTSK	CG2139-PA,CG2139-PB,CG2139-PC,CG2139-PD	2b	gi|24651389,gi|45552009,gi|24651387,gi|24651391	0	61
LLATNDELLDVYR	CG15117-PA,CG15117-PB,CG15117-PC	2b	gi|19922582,gi|24655438,gi|62471735	0	2
LLDEHQVYSVGR	CG17285-PA,CG17285-PB	2b	gi|24664081,gi|24664085	1	257
LLDSPDYPEDVK	CG1640-PA,CG1640-PB,CG1640-PC,CG1640-PD,CG1640-PE,CG1640-PF	2b	gi|24641760,gi|45551451,gi|24641764,gi|24641766,gi|24641768,gi|24641770	1	25
LLEANPNYSK	CG3359-PB,CG3359-PC,CG3359-PD,CG3359-PE,CG3359-PF,CG3359-PG,CG3359-PH,CG3359-PI,CG3359-PJ,CG3359-PK,CG3359-PL,CG3359-PM,CG3359-PN,CG3359-PO,CG3359-PP	2b	gi|24646161,gi|24646163,gi|28573039,gi|28573041,gi|28573043,gi|28573045,gi|28573047,gi|28573049,gi|28573051,gi|28573053,gi|28573061,gi|28573055,gi|28573057,gi|28573059,gi|28573037	1	29
LLEATQSADENNR	CG4843-PA,CG4843-PB,CG4843-PC	2b	gi|28571726,gi|24647095,gi|45551906	1	131
LLEDAFLPDLR	CG10844-PA,CG10844-PB,CG10844-PC,CG10844-PD	2b	gi|17352465,gi|17352467,gi|17352469,gi|17352471	0	11
LLEIAQVPPEHVDDFK	CG4347-PA,CG4347-PC	2b	gi|62484278,gi|62484452	1	69
LLEQPDVQPDR	CG11567-PA,CG11567-PB	2b	gi|17137192,gi|24582192	1	177
LLEQQDEYQGQNIYGNQK	CG17285-PA,CG17285-PB	2b	gi|24664081,gi|24664085	1	257
LLGVAGTDVPVEDIDK	CG12455-PA,CG12455-PB	2b	gi|24584558,gi|24584560	0	2
LLITAIR	CG1516-PA,CG1516-PB,CG1516-PD,CG1516-PE,CG1516-PG,CG1516-PI,CG1516-PJ,CG1516-PK,CG1516-PL	2b	gi|24652210,gi|24652212,gi|24652214,gi|19921944,gi|24652216,gi|24652218,gi|24652220,gi|24652222,gi|24652224	0	469
LLLSEIRR	CG1417-PA,CG1417-PB,CG1417-PC,CG1417-PD,CG1417-PE,CG1417-PF,CG1417-PG,CG1417-PH	2b	gi|24643717,gi|24643721,gi|24643723,gi|24643719,gi|24643715,gi|45556180,gi|45556169,gi|45556158	0	6
LLPDTTDEQLLTSALEEK	CG1483-PA,CG1483-PB	2b	gi|17864160,gi|24651799	1	2
LLPIAYVEGPNNSYR	CG1814-PA,CG1814-PB,CG1814-PC	2b	gi|45550393,gi|24652117,gi|45551045	1	2
LLPVGLDNLVLIPEESR	CG9325-PA,CG9325-PB,CG9325-PC,CG9325-PD,CG9325-PE,CG9325-PF	2b	gi|17136738,gi|24655667,gi|24655690,gi|24655685,gi|24655672,gi|24655677	1	30
LLQEGVDPK	CG4389-PA,CG4389-PB,CG4389-PC	2b	gi|19921000,gi|24583077,gi|24583079	1	210
LLQNYNPVTEEAGVR	CG4260-PA,CG4260-PB	2b	gi|28574818,gi|45552169	1	35
LLQTELPDQK	CG3359-PB,CG3359-PC,CG3359-PD,CG3359-PE,CG3359-PF,CG3359-PG,CG3359-PH,CG3359-PI,CG3359-PJ,CG3359-PK,CG3359-PL,CG3359-PM,CG3359-PN,CG3359-PO,CG3359-PP	2b	gi|24646161,gi|24646163,gi|28573039,gi|28573041,gi|28573043,gi|28573045,gi|28573047,gi|28573049,gi|28573051,gi|28573053,gi|28573061,gi|28573055,gi|28573057,gi|28573059,gi|28573037	1	29
LLTATESEVATQNR	CG4843-PA,CG4843-PB,CG4843-PC	2b	gi|28571726,gi|24647095,gi|45551906	1	131
LLTATESEVATQNRK	CG4843-PA,CG4843-PB,CG4843-PC	2b	gi|28571726,gi|24647095,gi|45551906	1	131
LLTSLCTAAR	CG9968-PA,CG9968-PB	2b	gi|17736989,gi|24642523	1	7
LMEEYER	CG4376-PA,CG4376-PB,CG4376-PC	2b	gi|24639238,gi|24639240,gi|17137758	0	241
LMGQPFDK	CG7930-PA,CG7930-PB	2b	gi|24665772,gi|24665776	0	40
LNAIQQDQQQDQLNGR	CG17285-PA,CG17285-PB	2b	gi|24664081,gi|24664085	1	257
LNETLETILNK	CG4260-PA,CG4260-PB	2b	gi|28574818,gi|45552169	1	35
LNIPVSEVNPR	CG5670-PA,CG5670-PB,CG5670-PC,CG5670-PD,CG5670-PE,CG5670-PF,CG5670-PG,CG5670-PH	2b	gi|24648576,gi|24648578,gi|24648580,gi|24648582,gi|45553441,gi|45553439,gi|45553437,gi|45553435	1	209
LNLGCGDGNANSGR	CG7340-PA,CG7340-PB,CG7340-PC	2b	gi|24646410,gi|21357381,gi|24646412	1	1
LNPLYEFK	CG9297-PA,CG9297-PB	2b	gi|28571703,gi|28571705	0	40
LNQESIAQGQLIEEQQQLINNPR	CG17285-PA,CG17285-PB	2b	gi|24664081,gi|24664085	1	257
LNSFSVNK	CG3725-PA,CG3725-PB,CG3725-PC,CG3725-PD,CG3725-PE,CG3725-PF,CG3725-PG,CG3725-PH	2b	gi|17136664,gi|24762445,gi|24762447,gi|24762449,gi|24762451,gi|24762453,gi|24762455,gi|24762457	1	581
LPCDLLILGTGSK	CG4199-PA,CG4199-PB,CG4199-PC,CG4199-PD,CG4199-PE,CG4199-PF	2b	gi|24639257,gi|24639250,gi|24639252,gi|18543267,gi|24639248,gi|45551208	1	2
LPENAVMNYSNLK	CG4347-PA,CG4347-PC	2b	gi|62484278,gi|62484452	1	69
LPGENNCGMVAWR	CG11198-PA,CG11198-PB,CG11198-PC,CG11198-PD	2b	gi|24586458,gi|24586460,gi|161076407,gi|161076409	1	52
LPIEIR	CG1516-PA,CG1516-PB,CG1516-PD,CG1516-PE,CG1516-PG,CG1516-PI,CG1516-PJ,CG1516-PK,CG1516-PL	2b	gi|24652210,gi|24652212,gi|24652214,gi|19921944,gi|24652216,gi|24652218,gi|24652220,gi|24652222,gi|24652224	0	469
LPISLSEEVSAVALK	CG6643-PA,CG6643-PB	2b	gi|24649705,gi|45552026	1	10
LPPNVVAVPDLVEAAK	CG9042-PA,CG9042-PB,CG9042-PC	2b	gi|17136204,gi|17136200,gi|17136202	1	16
LPTKPETPIIMVGPGTGLAPFR	CG11567-PA,CG11567-PB	2b	gi|17137192,gi|24582192	1	177
LPVVAATIYCNTYR	CG3861-PA,CG3861-PB	2b	gi|24640126,gi|24640124	1	71
LPVVNAAWDK	CG9057-PA,CG9057-PB,CG9057-PC	2b	gi|18859967,gi|116007162,gi|116007164	1	9
LPYEEFGLLYGK	CG2727-PA,CG2727-PB,CG2727-PC	2b	gi|24762808,gi|45551165,gi|24762812	0	5
LQAGEYVSLGK	CG8732-PA,CG8732-PB,CG8732-PC,CG8732-PD,CG8732-PE,CG8732-PF,CG8732-PG,CG8732-PH,CG8732-PI	2b	gi|24586634,gi|22026970,gi|24586636,gi|62471689,gi|62471687,gi|62471685,gi|62471683,gi|62471681,gi|62471679	1	107
LQAQAAETIANQK	CG32103-PA,CG32103-PB,CG32103-PC	2b	gi|45553079,gi|24663275,gi|24663279	1	2
LQDEDVAIVK	CG8983-PA,CG8983-PB	2b	gi|45551086,gi|19922048	1	72
LQDIGVENTEDNR	CG6058-PA,CG6058-PB,CG6058-PC,CG6058-PD,CG6058-PE,CG6058-PF,CG6058-PG,CG6058-PH	2b	gi|45551983,gi|24650278,gi|24650280,gi|24650282,gi|24650288,gi|24650276,gi|45551985,gi|45553577	1	57
LQEANQYVDQK	CG1648-PA,CG1648-PB	2b	gi|19921938,gi|24652180	1	9
LQFDSPVPHVR	CG7070-PA,CG7070-PB	2b	gi|28571814,gi|24648964	1	38
LQLLEPFDK	CG9244-PB,CG9244-PC	2b	gi|17864292,gi|161076999	1	473
LQPINDPSMR	CG1915-PA,CG1915-PC	2b	gi|24655827,gi|161080703	0	363
LQSYVVTSEGR	CG12908-PA,CG12908-PB	2b	gi|24652408,gi|45552547	1	41
LQTQVFK	CG3395-PA,CG3395-PB,CG3395-PD	2b	gi|24661707,gi|24661715,gi|24661711	1	34
LSAESPISEEDPVAATK	CG6643-PA,CG6643-PB	2b	gi|24649705,gi|45552026	1	10
LSDPVVQYTLR	CG17285-PA,CG17285-PB	2b	gi|24664081,gi|24664085	0	257
LSEASQAADESER	CG4898-PA,CG4898-PB,CG4898-PC,CG4898-PD,CG4898-PE,CG4898-PF,CG4898-PG,CG4898-PH,CG4898-PI,CG4898-PJ,CG4898-PK,CG4898-PL	2b	gi|24647089,gi|45551896,gi|24647085,gi|24647073,gi|45551900,gi|45551898,gi|24647075,gi|45551902,gi|45551904,gi|24647077,gi|45553377,gi|45553375	1	116
LSEIVLHNLR	CG17285-PA,CG17285-PB	2b	gi|24664081,gi|24664085	1	257
LSEYSSLR	CG32019-PA,CG32019-PC,CG32019-PD,CG32019-PE	2b	gi|28558739,gi|45552151,gi|45552153,gi|45552149	0	787
LSIENSDLLR	CG17927-PA,CG17927-PB,CG17927-PC,CG17927-PD,CG17927-PE,CG17927-PF,CG17927-PG,CG17927-PH,CG17927-PI,CG17927-PJ,CG17927-PK,CG17927-PL,CG17927-PM	2b	gi|24584704,gi|24584710,gi|24584692,gi|24584702,gi|24584696,gi|24584700,gi|24584694,gi|28574239,gi|24584706,gi|24584698,gi|24584712,gi|24584714,gi|24584716	1	2330
LSNRPAYLPTEGK	CG4376-PA,CG4376-PB,CG4376-PC	2b	gi|24639238,gi|24639240,gi|17137758	1	241
LSQGEYIVPEK	CG3961-PA,CG3961-PB,CG3961-PC	2b	gi|24666497,gi|24666505,gi|24666501	1	20
LSTEVEDLQLEVDR	CG17927-PA,CG17927-PB,CG17927-PC,CG17927-PD,CG17927-PE,CG17927-PF,CG17927-PG,CG17927-PH,CG17927-PI,CG17927-PJ,CG17927-PK,CG17927-PL,CG17927-PM	2b	gi|24584704,gi|24584710,gi|24584692,gi|24584702,gi|24584696,gi|24584700,gi|24584694,gi|28574239,gi|24584706,gi|24584698,gi|24584712,gi|24584714,gi|24584716	1	2330
LTEIINETHENVK	CG9042-PA,CG9042-PB,CG9042-PC	2b	gi|17136204,gi|17136200,gi|17136202	1	16
LTNTHLGK	CG17927-PA,CG17927-PB,CG17927-PC,CG17927-PD,CG17927-PE,CG17927-PF,CG17927-PG,CG17927-PH,CG17927-PI,CG17927-PJ,CG17927-PK,CG17927-PL,CG17927-PM	2b	gi|24584704,gi|24584710,gi|24584692,gi|24584702,gi|24584696,gi|24584700,gi|24584694,gi|28574239,gi|24584706,gi|24584698,gi|24584712,gi|24584714,gi|24584716	1	2330
LTPLEVEAR	CG9623-PA,CG9623-PB	2b	gi|24642643,gi|24642641	0	16
LTQEAVADLER	CG17927-PA,CG17927-PB,CG17927-PC,CG17927-PD,CG17927-PE,CG17927-PF,CG17927-PG,CG17927-PH,CG17927-PI,CG17927-PJ,CG17927-PK,CG17927-PL,CG17927-PM	2b	gi|24584704,gi|24584710,gi|24584692,gi|24584702,gi|24584696,gi|24584700,gi|24584694,gi|28574239,gi|24584706,gi|24584698,gi|24584712,gi|24584714,gi|24584716	1	2330
LTQEEDAR	CG17927-PA,CG17927-PB,CG17927-PC,CG17927-PD,CG17927-PE,CG17927-PF,CG17927-PG,CG17927-PH,CG17927-PI,CG17927-PJ,CG17927-PK,CG17927-PL,CG17927-PM	2b	gi|24584704,gi|24584710,gi|24584692,gi|24584702,gi|24584696,gi|24584700,gi|24584694,gi|28574239,gi|24584706,gi|24584698,gi|24584712,gi|24584714,gi|24584716	1	2330
LTSVPTALDMELTGK	CG4389-PA,CG4389-PB,CG4389-PC	2b	gi|19921000,gi|24583077,gi|24583079	1	210
LTVNDLVR	CG2139-PA,CG2139-PB,CG2139-PC,CG2139-PD	2b	gi|24651389,gi|45552009,gi|24651387,gi|24651391	1	61
LVAGLATSPPSSEDLPK	CG7263-PA,CG7263-PB	2b	gi|24581020,gi|28573993	1	7
LVAQLPPSINALTGVDLSK	CG32593-PA,CG32593-PB,CG32593-PC,CG32593-PD,CG32593-PE,CG32593-PF	2b	gi|24642027,gi|24642031,gi|24642061,gi|24642065,gi|24642029,gi|24642033	1	32
LVEYLSMR	CG2216-PA,CG2216-PB,CG2216-PC,CG2216-PD,CG2216-PE	2b	gi|17933722,gi|24651356,gi|24651358,gi|24651360,gi|24651362	1	31
LVFQSVSPCEDGK	CG33519-PB,CG33519-PC	2b	gi|161077453,gi|161077455	1	65
LVLEVAQHLGENTVR	CG11154-PA,CG11154-PB	2b	gi|24638766,gi|24638768	1	585
LVLSDVTSADSGK	CG33103-PA,CG33103-PB	2b	gi|28572036,gi|28572038	1	438
LVNWEEGNYR	CG8732-PA,CG8732-PB,CG8732-PC,CG8732-PD,CG8732-PE,CG8732-PF,CG8732-PG,CG8732-PH,CG8732-PI	2b	gi|24586634,gi|22026970,gi|24586636,gi|62471689,gi|62471687,gi|62471685,gi|62471683,gi|62471681,gi|62471679	1	107
LVTAVNEIEK	CG32031-PA,CG32031-PB,CG32031-PC,CG32031-PD,CG32031-PE,CG32031-PF	2b	gi|24661336,gi|24661340,gi|24661344,gi|24661348,gi|161082598,gi|161082600	1	143
LVTAVNEIEKR	CG32031-PA,CG32031-PB,CG32031-PC,CG32031-PD,CG32031-PE,CG32031-PF	2b	gi|24661336,gi|24661340,gi|24661344,gi|24661348,gi|161082598,gi|161082600	1	143
LVTGWQKPIVIGR	CG7176-PA,CG7176-PB,CG7176-PC,CG7176-PD,CG7176-PE,CG7176-PF,CG7176-PG	2b	gi|24660860,gi|24660849,gi|21356561,gi|24660856,gi|24660864,gi|24660868,gi|28574947	1	35
LYEEVQQVDQDLEGK	CG11466-PA,CG11466-PB	2b	gi|21357069,gi|45553345	1	5
LYTDVIQTAA	CG4307-PA,CG4307-PB	2b	gi|24647054,gi|24647056	0	64
LYVEVPR	CG1915-PA,CG1915-PC	2b	gi|24655827,gi|161080703	0	363
MAILTDR	CG6206-PA,CG6206-PB	2b	gi|19921088,gi|24583443	0	68
MATSGANDEDEVVIAAFK	CG2184-PA,CG2184-PB	2b	gi|17933672,gi|45552007	1	196
MDATANDVPPEFNVR	CG8983-PA,CG8983-PB	2b	gi|45551086,gi|19922048	1	72
MDENNDGQLTQDEFLK	CG7646-PA,CG7646-PB	2b	gi|24667132,gi|28574619	1	1
MDQLTNQLK	CG4843-PA,CG4843-PB,CG4843-PC	2b	gi|28571726,gi|24647095,gi|45551906	1	131
MFIFDK	CG3725-PA,CG3725-PB,CG3725-PC,CG3725-PD,CG3725-PE,CG3725-PF,CG3725-PG,CG3725-PH	2b	gi|17136664,gi|24762445,gi|24762447,gi|24762449,gi|24762451,gi|24762453,gi|24762455,gi|24762457	1	581
MGAIVAVTGDGVNDSPALK	CG5670-PA,CG5670-PB,CG5670-PC,CG5670-PD,CG5670-PE,CG5670-PF,CG5670-PG,CG5670-PH	2b	gi|24648576,gi|24648578,gi|24648580,gi|24648582,gi|45553441,gi|45553439,gi|45553437,gi|45553435	1	209
MGETTIDMMYGGMR	CG3861-PA,CG3861-PB	2b	gi|24640126,gi|24640124	1	71
MGLTEFEAVK	CG32031-PA,CG32031-PB,CG32031-PC,CG32031-PD,CG32031-PE,CG32031-PF	2b	gi|24661336,gi|24661340,gi|24661344,gi|24661348,gi|161082598,gi|161082600	1	143
MKEDPSFGQSGSQDFAPAQK	CG1041-PA,CG1041-PB	2b	gi|45550701,gi|116007970	1	3
MLAEDADTK	CG4843-PA,CG4843-PB,CG4843-PC	2b	gi|28571726,gi|24647095,gi|45551906	1	131
MLAEDADTKSDEVSR	CG4843-PA,CG4843-PB,CG4843-PC	2b	gi|28571726,gi|24647095,gi|45551906	1	131
MLGYDNAPFTELMR	CG3861-PA,CG3861-PB	2b	gi|24640126,gi|24640124	1	71
MLQENIDTLEK	CG8732-PA,CG8732-PB,CG8732-PC,CG8732-PD,CG8732-PE,CG8732-PF,CG8732-PG,CG8732-PH,CG8732-PI	2b	gi|24586634,gi|22026970,gi|24586636,gi|62471689,gi|62471687,gi|62471685,gi|62471683,gi|62471681,gi|62471679	1	107
MLSNPIGIAAGFDK	CG9741-PA,CG9741-PB,CG9741-PC	2b	gi|17137316,gi|24645108,gi|24645105	0	4
MMGSAGTEIGQNEGSLR	CG7639-PA,CG7639-PB	2b	gi|24653772,gi|45552629	1	5
MMYPDFK	CG17927-PA,CG17927-PB,CG17927-PC,CG17927-PD,CG17927-PE,CG17927-PF,CG17927-PG,CG17927-PH,CG17927-PI,CG17927-PJ,CG17927-PK,CG17927-PL,CG17927-PM	2b	gi|24584704,gi|24584710,gi|24584692,gi|24584702,gi|24584696,gi|24584700,gi|24584694,gi|28574239,gi|24584706,gi|24584698,gi|24584712,gi|24584714,gi|24584716	0	2330
MQDLVDK	CG17927-PA,CG17927-PB,CG17927-PC,CG17927-PD,CG17927-PE,CG17927-PF,CG17927-PG,CG17927-PH,CG17927-PI,CG17927-PJ,CG17927-PK,CG17927-PL,CG17927-PM	2b	gi|24584704,gi|24584710,gi|24584692,gi|24584702,gi|24584696,gi|24584700,gi|24584694,gi|28574239,gi|24584706,gi|24584698,gi|24584712,gi|24584714,gi|24584716	1	2330
MQDLVDKLQQK	CG17927-PA,CG17927-PB,CG17927-PC,CG17927-PD,CG17927-PE,CG17927-PF,CG17927-PG,CG17927-PH,CG17927-PI,CG17927-PJ,CG17927-PK,CG17927-PL,CG17927-PM	2b	gi|24584704,gi|24584710,gi|24584692,gi|24584702,gi|24584696,gi|24584700,gi|24584694,gi|28574239,gi|24584706,gi|24584698,gi|24584712,gi|24584714,gi|24584716	1	2330
MQEIER	CG6803-PA,CG6803-PB,CG6803-PC,CG6803-PD,CG6803-PE	2b	gi|24646989,gi|21357797,gi|24646991,gi|24646986,gi|24646984	0	71
MQEVLQHQDFTK	CG6148-PA,CG6148-PB	2b	gi|24646379,gi|24646381	1	16
MQLLEIITHPGTSK	CG4389-PA,CG4389-PB,CG4389-PC	2b	gi|19921000,gi|24583077,gi|24583079	1	210
MQTFENPPTYNR	CG1709-PA,CG1709-PB,CG1709-PC,CG1709-PD,CG1709-PE,CG1709-PF,CG1709-PG,CG1709-PH	2b	gi|24650959,gi|24650965,gi|24650956,gi|24650967,gi|21358171,gi|24650961,gi|24650963,gi|45551995	1	17
MRLEEAEK	CG7107-PA,CG7107-PB,CG7107-PD,CG7107-PE,CG7107-PF,CG7107-PG	2b	gi|24641813,gi|24641811,gi|24641815,gi|62473677,gi|62473664,gi|62473654	0	236
MSLEDLQLQK	CG17285-PA,CG17285-PB	2b	gi|24664081,gi|24664085	1	257
MTDIITNEVSGADLK	CG2168-PA,CG2168-PB,CG2168-PD	2b	gi|17864162,gi|24638499,gi|24638501	1	33
MTEAAVR	CG1516-PA,CG1516-PB,CG1516-PD,CG1516-PE,CG1516-PG,CG1516-PI,CG1516-PJ,CG1516-PK,CG1516-PL	2b	gi|24652210,gi|24652212,gi|24652214,gi|19921944,gi|24652216,gi|24652218,gi|24652220,gi|24652222,gi|24652224	0	469
MTPISGDCCAPDLGISETDRR	CG10097-PA,CG10097-PB	2b	gi|24646271,gi|78706758	0	80
MTQHLEQLELGDK	CG5946-PA,CG5946-PB,CG5946-PC,CG5946-PD	2b	gi|24662938,gi|24662934,gi|116007806,gi|116007804	1	3
NAACNAYQNGK	CG33129-PA,CG33129-PB,CG33129-PC,CG33129-PE	2b	gi|28574518,gi|28574520,gi|28574522,gi|28574516	1	15
NAALEYYNQFHK	CG33129-PA,CG33129-PB,CG33129-PC,CG33129-PE	2b	gi|28574518,gi|28574520,gi|28574522,gi|28574516	1	15
NAASIYEFTVK	CG12013-PA,CG12013-PB,CG12013-PC,CG12013-PD	2b	gi|24656777,gi|21356883,gi|24656767,gi|24656772	1	55
NADFTTPCEK	CG3359-PB,CG3359-PC,CG3359-PD,CG3359-PE,CG3359-PF,CG3359-PG,CG3359-PH,CG3359-PI,CG3359-PJ,CG3359-PK,CG3359-PL,CG3359-PM,CG3359-PN,CG3359-PO,CG3359-PP	2b	gi|24646161,gi|24646163,gi|28573039,gi|28573041,gi|28573043,gi|28573045,gi|28573047,gi|28573049,gi|28573051,gi|28573053,gi|28573061,gi|28573055,gi|28573057,gi|28573059,gi|28573037	1	29
NAELVWAQEEHK	CG11661-PA,CG11661-PB,CG11661-PC,CG11661-PE,CG11661-PF,CG11661-PG,CG11661-PH,CG11661-PI	2b	gi|24665669,gi|24665673,gi|24665677,gi|28574585,gi|28574590,gi|28574592,gi|161084450,gi|161084461	1	218
NAESAIEALK	CG3725-PA,CG3725-PB,CG3725-PC,CG3725-PD,CG3725-PE,CG3725-PF,CG3725-PG,CG3725-PH	2b	gi|17136664,gi|24762445,gi|24762447,gi|24762449,gi|24762451,gi|24762453,gi|24762455,gi|24762457	1	581
NAESAIEALKEYEPEMGK	CG3725-PA,CG3725-PB,CG3725-PC,CG3725-PD,CG3725-PE,CG3725-PF,CG3725-PG,CG3725-PH	2b	gi|17136664,gi|24762445,gi|24762447,gi|24762449,gi|24762451,gi|24762453,gi|24762455,gi|24762457	1	581
NAIGEAVTTCAVNVTANK	CG1915-PA,CG1915-PC	2b	gi|24655827,gi|161080703	1	363
NALNQLTVQSK	CG6206-PA,CG6206-PB	2b	gi|19921088,gi|24583443	1	68
NAVGAVSSATVK	CG14981-PA,CG14981-PB	2b	gi|17647639,gi|24657033	1	16
NCGPDNICEPDLK	CG9623-PA,CG9623-PB	2b	gi|24642643,gi|24642641	0	16
NCLDLYADK	CG11661-PA,CG11661-PB,CG11661-PC,CG11661-PE,CG11661-PF,CG11661-PG,CG11661-PH,CG11661-PI	2b	gi|24665669,gi|24665673,gi|24665677,gi|28574585,gi|28574590,gi|28574592,gi|161084450,gi|161084461	1	218
NDANPATHCFVTSPELVTALSIAGR	CG9244-PB,CG9244-PC	2b	gi|17864292,gi|161076999	1	473
NDDGTYTCLAYNK	CG8779-PA,CG8779-PB	2b	gi|78707507,gi|116007846	0	10
NDLENQLR	CG17927-PA,CG17927-PB,CG17927-PC,CG17927-PD,CG17927-PE,CG17927-PF,CG17927-PG,CG17927-PH,CG17927-PI,CG17927-PJ,CG17927-PK,CG17927-PL,CG17927-PM	2b	gi|24584704,gi|24584710,gi|24584692,gi|24584702,gi|24584696,gi|24584700,gi|24584694,gi|28574239,gi|24584706,gi|24584698,gi|24584712,gi|24584714,gi|24584716	1	2330
NDYFEMFAPK	CG31794-PA,CG31794-PB,CG31794-PC,CG31794-PD,CG31794-PF,CG31794-PG	2b	gi|24585205,gi|24585203,gi|24585199,gi|85816104,gi|85816101,gi|85724960	1	5
NEAGSDEAHVR	CG33950-PA,CG33950-PB,CG33950-PC,CG33950-PD,CG33950-PE,CG33950-PF,CG33950-PG	2b	gi|78706472,gi|78706470,gi|78706464,gi|78706466,gi|78706468,gi|78706474,gi|161077537	1	871
NEFQPIAGPIK	CG10724-PA,CG10724-PB	2b	gi|21356527,gi|24663783	1	8
NEYITPLGAELK	CG10844-PA,CG10844-PB,CG10844-PC,CG10844-PD	2b	gi|17352465,gi|17352467,gi|17352469,gi|17352471	1	11
NFDDLVINNGK	CG8983-PA,CG8983-PB	2b	gi|45551086,gi|19922048	1	72
NFLELTELK	CG1709-PA,CG1709-PB,CG1709-PC,CG1709-PD,CG1709-PE,CG1709-PF,CG1709-PG,CG1709-PH	2b	gi|24650959,gi|24650965,gi|24650956,gi|24650967,gi|21358171,gi|24650961,gi|24650963,gi|45551995	1	17
NGGQLFEDAHTR	CG33484-PA,CG33484-PB,CG33484-PC,CG33484-PD	2b	gi|45580802,gi|116007758,gi|116007760,gi|116007762	1	226
NGIGSGSGGLAPAASR	CG5442-PA,CG5442-PB	2b	gi|45552333,gi|21358099	1	2
NGQMFGLK	CG33103-PA,CG33103-PB	2b	gi|28572036,gi|28572038	0	438
NGSWGGVPDVAR	CG9244-PB,CG9244-PC	2b	gi|17864292,gi|161076999	1	473
NILFSGTNVAAGK	CG3725-PA,CG3725-PB,CG3725-PC,CG3725-PD,CG3725-PE,CG3725-PF,CG3725-PG,CG3725-PH	2b	gi|17136664,gi|24762445,gi|24762447,gi|24762449,gi|24762451,gi|24762453,gi|24762455,gi|24762457	1	581
NINEVENQILTR	CG4376-PA,CG4376-PB,CG4376-PC	2b	gi|24639238,gi|24639240,gi|17137758	1	241
NITGVSNNGGVDDTGLGVLIK	CG1140-PA,CG1140-PB	2b	gi|21358325,gi|24655794	1	10
NIVACGAGFVDGLK	CG9042-PA,CG9042-PB,CG9042-PC	2b	gi|17136204,gi|17136200,gi|17136202	1	16
NIVGEATGVATITVQEPTLVQIIPDNR	CG33950-PA,CG33950-PB,CG33950-PC,CG33950-PD,CG33950-PE,CG33950-PF,CG33950-PG	2b	gi|78706472,gi|78706470,gi|78706464,gi|78706466,gi|78706468,gi|78706474,gi|161077537	1	871
NIVHILEDIK	CG11567-PA,CG11567-PB	2b	gi|17137192,gi|24582192	1	177
NKDPLNDTVVDQFK	CG17927-PA,CG17927-PB,CG17927-PC,CG17927-PD,CG17927-PE,CG17927-PF,CG17927-PG,CG17927-PH,CG17927-PI,CG17927-PJ,CG17927-PK,CG17927-PL,CG17927-PM	2b	gi|24584704,gi|24584710,gi|24584692,gi|24584702,gi|24584696,gi|24584700,gi|24584694,gi|28574239,gi|24584706,gi|24584698,gi|24584712,gi|24584714,gi|24584716	1	2330
NKDPLNDTVVDQFKK	CG17927-PA,CG17927-PB,CG17927-PC,CG17927-PD,CG17927-PE,CG17927-PF,CG17927-PG,CG17927-PH,CG17927-PI,CG17927-PJ,CG17927-PK,CG17927-PL,CG17927-PM	2b	gi|24584704,gi|24584710,gi|24584692,gi|24584702,gi|24584696,gi|24584700,gi|24584694,gi|28574239,gi|24584706,gi|24584698,gi|24584712,gi|24584714,gi|24584716	1	2330
NKENQCGIASASSYPLV	CG6692-PA,CG6692-PB,CG6692-PC	2b	gi|24653516,gi|24653518,gi|24653514	1	104
NKSELEESDTDPQEQ	CG31605-PA,CG31605-PB,CG31605-PC,CG31605-PD,CG31605-PE,CG31605-PF,CG31605-PG,CG31605-PH,CG31605-PI	2b	gi|24582681,gi|24582683,gi|24582685,gi|24582687,gi|24582689,gi|24582691,gi|161076803,gi|24582693,gi|24582695	1	4
NLADEVK	CG17927-PA,CG17927-PB,CG17927-PC,CG17927-PD,CG17927-PE,CG17927-PF,CG17927-PG,CG17927-PH,CG17927-PI,CG17927-PJ,CG17927-PK,CG17927-PL,CG17927-PM	2b	gi|24584704,gi|24584710,gi|24584692,gi|24584702,gi|24584696,gi|24584700,gi|24584694,gi|28574239,gi|24584706,gi|24584698,gi|24584712,gi|24584714,gi|24584716	1	2330
NLAFFSTNAVEGTAK	CG5670-PA,CG5670-PB,CG5670-PC,CG5670-PD,CG5670-PE,CG5670-PF,CG5670-PG,CG5670-PH	2b	gi|24648576,gi|24648578,gi|24648580,gi|24648582,gi|45553441,gi|45553439,gi|45553437,gi|45553435	1	209
NLEGALAK	CG7176-PA,CG7176-PB,CG7176-PC,CG7176-PD,CG7176-PE,CG7176-PF,CG7176-PG	2b	gi|24660860,gi|24660849,gi|21356561,gi|24660856,gi|24660864,gi|24660868,gi|28574947	0	35
NLEHDLDNLR	CG17927-PA,CG17927-PB,CG17927-PC,CG17927-PD,CG17927-PE,CG17927-PF,CG17927-PG,CG17927-PH,CG17927-PI,CG17927-PJ,CG17927-PK,CG17927-PL,CG17927-PM	2b	gi|24584704,gi|24584710,gi|24584692,gi|24584702,gi|24584696,gi|24584700,gi|24584694,gi|28574239,gi|24584706,gi|24584698,gi|24584712,gi|24584714,gi|24584716	1	2330
NLETANAVKDEIVK	CG7675-PA,CG7675-PB,CG7675-PC	2b	gi|24647948,gi|24647946,gi|45553409	1	8
NLIEKPEDSSVAK	CG17332-PA,CG17332-PB,CG17332-PD	2b	gi|24584671,gi|24584673,gi|24584675	1	6
NLILLQDALDK	CG5939-PA,CG5939-PB,CG5939-PC,CG5939-PD	2b	gi|24661112,gi|24661116,gi|24661120,gi|24661124	1	578
NLLIGSK	CG12740-PA,CG12740-PB,CG12740-PC,CG12740-PD	2b	gi|24656625,gi|24656628,gi|24656637,gi|24656632	1	8
NLLPCELGLAGQNAYK	CG2171-PA,CG2171-PB,CG2171-PC	2b	gi|28572004,gi|28572006,gi|28572008	1	22
NLNDEIAHQDELINK	CG17927-PA,CG17927-PB,CG17927-PC,CG17927-PD,CG17927-PE,CG17927-PF,CG17927-PG,CG17927-PH,CG17927-PI,CG17927-PJ,CG17927-PK,CG17927-PL,CG17927-PM	2b	gi|24584704,gi|24584710,gi|24584692,gi|24584702,gi|24584696,gi|24584700,gi|24584694,gi|28574239,gi|24584706,gi|24584698,gi|24584712,gi|24584714,gi|24584716	1	2330
NLPEGVALQASR	CG4247-PA,CG4247-PB,CG4247-PC	2b	gi|28571716,gi|24647027,gi|161078308	1	4
NLQSLPGPMDEFVQK	CG33484-PA,CG33484-PB,CG33484-PC,CG33484-PD	2b	gi|45580802,gi|116007758,gi|116007760,gi|116007762	0	226
NMAVDVR	CG11567-PA,CG11567-PB	2b	gi|17137192,gi|24582192	0	177
NMYTYTHTSYLPK	CG33950-PA,CG33950-PB,CG33950-PC,CG33950-PD,CG33950-PE,CG33950-PF,CG33950-PG	2b	gi|78706472,gi|78706470,gi|78706464,gi|78706466,gi|78706468,gi|78706474,gi|161077537	0	871
NNFPTLESCEDHCPR	CG33103-PA,CG33103-PB	2b	gi|28572036,gi|28572038	0	438
NNNAFLLK	CG12740-PA,CG12740-PB,CG12740-PC,CG12740-PD	2b	gi|24656625,gi|24656628,gi|24656637,gi|24656632	1	8
NNSALPLVFK	CG5014-PA,CG5014-PB,CG5014-PC,CG5014-PD	2b	gi|45554154,gi|18543325,gi|45554146,gi|45554137	1	15
NPFDEPGKPENLK	CG32019-PA,CG32019-PC,CG32019-PD,CG32019-PE	2b	gi|28558739,gi|45552151,gi|45552153,gi|45552149	1	787
NPFDVPTKPGTPTIK	CG32019-PA,CG32019-PC,CG32019-PD,CG32019-PE	2b	gi|28558739,gi|45552151,gi|45552153,gi|45552149	1	787
NPFLAPIK	CG11567-PA,CG11567-PB	2b	gi|17137192,gi|24582192	1	177
NPYDPPSPPSQPVIDDYDNK	CG32019-PA,CG32019-PC,CG32019-PD,CG32019-PE	2b	gi|28558739,gi|45552151,gi|45552153,gi|45552149	1	787
NQGPAQAPQISQKPR	CG1915-PA,CG1915-PC	2b	gi|24655827,gi|161080703	0	363
NQGSWTYVQPR	CG11661-PA,CG11661-PB,CG11661-PC,CG11661-PE,CG11661-PF,CG11661-PG,CG11661-PH,CG11661-PI	2b	gi|24665669,gi|24665673,gi|24665677,gi|28574585,gi|28574590,gi|28574592,gi|161084450,gi|161084461	1	218
NQIDTAALIEMLTGK	CG2184-PA,CG2184-PB	2b	gi|17933672,gi|45552007	1	196
NQLFQQK	CG17927-PA,CG17927-PB,CG17927-PC,CG17927-PD,CG17927-PE,CG17927-PF,CG17927-PG,CG17927-PH,CG17927-PI,CG17927-PJ,CG17927-PK,CG17927-PL,CG17927-PM	2b	gi|24584704,gi|24584710,gi|24584692,gi|24584702,gi|24584696,gi|24584700,gi|24584694,gi|28574239,gi|24584706,gi|24584698,gi|24584712,gi|24584714,gi|24584716	1	2330
NQLGEAVTSCSVR	CG1915-PA,CG1915-PC	2b	gi|24655827,gi|161080703	0	363
NQVGLGNWGVNQQQSTPR	CG3665-PA,CG3665-PB,CG3665-PC	2b	gi|17933556,gi|24639637,gi|24639639	1	1
NSAPDVVIK	CG33950-PA,CG33950-PB,CG33950-PC,CG33950-PD,CG33950-PE,CG33950-PF,CG33950-PG	2b	gi|78706472,gi|78706470,gi|78706464,gi|78706466,gi|78706468,gi|78706474,gi|161077537	0	871
NSVGESIATTELK	CG1915-PA,CG1915-PC	2b	gi|24655827,gi|161080703	1	363
NSWGTTWGDK	CG6692-PA,CG6692-PB,CG6692-PC	2b	gi|24653516,gi|24653518,gi|24653514	1	104
NTLHCWATIAK	CG16944-PA,CG16944-PB,CG16944-PC,CG16944-PD	2b	gi|18079273,gi|24641095,gi|24641090,gi|24641092	1	349
NTNEMWQSMSPEEK	CG10097-PA,CG10097-PB	2b	gi|24646271,gi|78706758	0	80
NTPEEIALATVQALR	CG6058-PA,CG6058-PB,CG6058-PC,CG6058-PD,CG6058-PE,CG6058-PF,CG6058-PG,CG6058-PH	2b	gi|45551983,gi|24650278,gi|24650280,gi|24650282,gi|24650288,gi|24650276,gi|45551985,gi|45553577	1	57
NTPSYQSILENANVLAR	CG6058-PA,CG6058-PB,CG6058-PC,CG6058-PD,CG6058-PE,CG6058-PF,CG6058-PG,CG6058-PH	2b	gi|45551983,gi|24650278,gi|24650280,gi|24650282,gi|24650288,gi|24650276,gi|45551985,gi|45553577	1	57
NTQEVVENVIGELK	CG6148-PA,CG6148-PB	2b	gi|24646379,gi|24646381	1	16
NTQFWR	CG16944-PA,CG16944-PB,CG16944-PC,CG16944-PD	2b	gi|18079273,gi|24641095,gi|24641090,gi|24641092	0	349
NTRPQPEVSWFR	CG8779-PA,CG8779-PB	2b	gi|78707507,gi|116007846	0	10
NTSGFDTATINVR	CG32019-PA,CG32019-PC,CG32019-PD,CG32019-PE	2b	gi|28558739,gi|45552151,gi|45552153,gi|45552149	1	787
NTSSTTTSTATATITK	CG1483-PA,CG1483-PB	2b	gi|17864160,gi|24651799	1	2
NTTTIPELTEGQEYEFR	CG32019-PA,CG32019-PC,CG32019-PD,CG32019-PE	2b	gi|28558739,gi|45552151,gi|45552153,gi|45552149	1	787
NVEYLAESIHK	CG4233-PA,CG4233-PB,CG4233-PC	2b	gi|24580970,gi|24580972,gi|19920542	1	88
NVIGDQCDQCRPGTYGLSAQNQDGCK	CG33950-PA,CG33950-PB,CG33950-PC,CG33950-PD,CG33950-PE,CG33950-PF,CG33950-PG	2b	gi|78706472,gi|78706470,gi|78706464,gi|78706466,gi|78706468,gi|78706474,gi|161077537	0	871
NVLSAFDVEGIR	CG6206-PA,CG6206-PB	2b	gi|19921088,gi|24583443	1	68
NVNDPTSIASDLSAENTK	CG1674-PA,CG1674-PB,CG1674-PC,CG1674-PD	2b	gi|24638575,gi|24638571,gi|24638573,gi|45552133	1	1
NVNVQNFHLSFK	CG4376-PA,CG4376-PB,CG4376-PC	2b	gi|24639238,gi|24639240,gi|17137758	1	241
NVQQVTNSIGALCK	CG17927-PA,CG17927-PB,CG17927-PC,CG17927-PD,CG17927-PE,CG17927-PF,CG17927-PG,CG17927-PH,CG17927-PI,CG17927-PJ,CG17927-PK,CG17927-PL,CG17927-PM	2b	gi|24584704,gi|24584710,gi|24584692,gi|24584702,gi|24584696,gi|24584700,gi|24584694,gi|28574239,gi|24584706,gi|24584698,gi|24584712,gi|24584714,gi|24584716	1	2330
NVTIETPDYYTK	CG32019-PA,CG32019-PC,CG32019-PD,CG32019-PE	2b	gi|28558739,gi|45552151,gi|45552153,gi|45552149	0	787
NYSTELFR	CG17927-PA,CG17927-PB,CG17927-PC,CG17927-PD,CG17927-PE,CG17927-PF,CG17927-PG,CG17927-PH,CG17927-PI,CG17927-PJ,CG17927-PK,CG17927-PL,CG17927-PM	2b	gi|24584704,gi|24584710,gi|24584692,gi|24584702,gi|24584696,gi|24584700,gi|24584694,gi|28574239,gi|24584706,gi|24584698,gi|24584712,gi|24584714,gi|24584716	1	2330
PAEIKPSAPAEPETPTK	CG11949-PA,CG11949-PB,CG11949-PC,CG11949-PD	2b	gi|24655527,gi|24655522,gi|24655517,gi|24655532	0	43
PKPVANQEDEDPTPYLFVSLEQR	CG17927-PA,CG17927-PB,CG17927-PC,CG17927-PD,CG17927-PE,CG17927-PF,CG17927-PG,CG17927-PH,CG17927-PI,CG17927-PJ,CG17927-PK,CG17927-PL,CG17927-PM	2b	gi|24584704,gi|24584710,gi|24584692,gi|24584702,gi|24584696,gi|24584700,gi|24584694,gi|28574239,gi|24584706,gi|24584698,gi|24584712,gi|24584714,gi|24584716	0	2330
QADNSLAGVQK	CG4376-PA,CG4376-PB,CG4376-PC	2b	gi|24639238,gi|24639240,gi|17137758	0	241
QAEQELADAHEQLNEVSAQNASISAAK	CG17927-PA,CG17927-PB,CG17927-PC,CG17927-PD,CG17927-PE,CG17927-PF,CG17927-PG,CG17927-PH,CG17927-PI,CG17927-PJ,CG17927-PK,CG17927-PL,CG17927-PM	2b	gi|24584704,gi|24584710,gi|24584692,gi|24584702,gi|24584696,gi|24584700,gi|24584694,gi|28574239,gi|24584706,gi|24584698,gi|24584712,gi|24584714,gi|24584716	1	2330
QAIETPDQPEFEPFVQGK	CG1539-PA,CG1539-PB,CG1539-PC,CG1539-PD,CG1539-PE,CG1539-PF,CG1539-PG	2b	gi|17136980,gi|17136982,gi|24651447,gi|24651441,gi|24651443,gi|24651445,gi|161079282	1	2
QCQTIEGAR	CG32593-PA,CG32593-PB,CG32593-PC,CG32593-PD,CG32593-PE,CG32593-PF	2b	gi|24642027,gi|24642031,gi|24642061,gi|24642065,gi|24642029,gi|24642033	0	32
QDVCDEEPAPGECSTWVLK	CG33103-PA,CG33103-PB	2b	gi|28572036,gi|28572038	0	438
QEGTGAFFK	CG16944-PA,CG16944-PB,CG16944-PC,CG16944-PD	2b	gi|18079273,gi|24641095,gi|24641090,gi|24641092	0	349
QESGSTLNIDSEK	CG4533-PA,CG4533-PB	2b	gi|17737499,gi|24762361	0	14
QGDLDFQR	CG4376-PA,CG4376-PB,CG4376-PC	2b	gi|24639238,gi|24639240,gi|17137758	0	241
QGFVIYR	CG17420-PA,CG17420-PB,CG17420-PC,CG17420-PD	2b	gi|62862016,gi|62862018,gi|161076131,gi|161076128	0	9
QGLLPLTFANPADYDK	CG9244-PB,CG9244-PC	2b	gi|17864292,gi|161076999	1	473
QGQSQPLTTSQPITAK	CG32019-PA,CG32019-PC,CG32019-PD,CG32019-PE	2b	gi|28558739,gi|45552151,gi|45552153,gi|45552149	1	787
QGTSEPLTTAQAIIAK	CG32019-PA,CG32019-PC,CG32019-PD,CG32019-PE	2b	gi|28558739,gi|45552151,gi|45552153,gi|45552149	1	787
QGVNTVQK	CG31794-PA,CG31794-PB,CG31794-PC,CG31794-PD,CG31794-PF,CG31794-PG	2b	gi|24585205,gi|24585203,gi|24585199,gi|85816104,gi|85816101,gi|85724960	0	5
QIDTVPASIEALPEIVK	CG18003-PA,CG18003-PB	2b	gi|78707190,gi|78707188	1	2
QIEEAEEIAALNLAK	CG17927-PA,CG17927-PB,CG17927-PC,CG17927-PD,CG17927-PE,CG17927-PF,CG17927-PG,CG17927-PH,CG17927-PI,CG17927-PJ,CG17927-PK,CG17927-PL,CG17927-PM	2b	gi|24584704,gi|24584710,gi|24584692,gi|24584702,gi|24584696,gi|24584700,gi|24584694,gi|28574239,gi|24584706,gi|24584698,gi|24584712,gi|24584714,gi|24584716	1	2330
QIEIESQEVQR	CG32593-PA,CG32593-PB,CG32593-PC,CG32593-PD,CG32593-PE,CG32593-PF	2b	gi|24642027,gi|24642031,gi|24642061,gi|24642065,gi|24642029,gi|24642033	1	32
QIENSATDAR	CG2852-PA,CG2852-PB	2b	gi|20130249,gi|24658306	1	39
QIFLEYENLSGNDIEK	CG5730-PA,CG5730-PB,CG5730-PC,CG5730-PD	2b	gi|17136266,gi|17136264,gi|45553447,gi|45553445	1	61
QIGNAVLESPLTTYAAER	CG10374-PA,CG10374-PB,CG10374-PC	2b	gi|45551956,gi|45551958,gi|45550802	1	3
QILSEEDEVQQNGR	CG8732-PA,CG8732-PB,CG8732-PC,CG8732-PD,CG8732-PE,CG8732-PF,CG8732-PG,CG8732-PH,CG8732-PI	2b	gi|24586634,gi|22026970,gi|24586636,gi|62471689,gi|62471687,gi|62471685,gi|62471683,gi|62471681,gi|62471679	1	107
QITESFSSFQTSLEK	CG11198-PA,CG11198-PB,CG11198-PC,CG11198-PD	2b	gi|24586458,gi|24586460,gi|161076407,gi|161076409	1	52
QLALAVDQVNR	CG5077-PA,CG5077-PB,CG5077-PC,CG5077-PD	2b	gi|62484308,gi|62484485,gi|62484487,gi|24648385	0	4
QLEEAESQVSQLSK	CG17927-PA,CG17927-PB,CG17927-PC,CG17927-PD,CG17927-PE,CG17927-PF,CG17927-PG,CG17927-PH,CG17927-PI,CG17927-PJ,CG17927-PK,CG17927-PL,CG17927-PM	2b	gi|24584704,gi|24584710,gi|24584692,gi|24584702,gi|24584696,gi|24584700,gi|24584694,gi|28574239,gi|24584706,gi|24584698,gi|24584712,gi|24584714,gi|24584716	1	2330
QLEGEIAIVR	CG11661-PA,CG11661-PB,CG11661-PC,CG11661-PE,CG11661-PF,CG11661-PG,CG11661-PH,CG11661-PI	2b	gi|24665669,gi|24665673,gi|24665677,gi|28574585,gi|28574590,gi|28574592,gi|161084450,gi|161084461	0	218
QLELSGFR	CG5840-PA,CG5840-PB	2b	gi|21358587,gi|24647700	0	28
QLETYAPPPKPVVEEK	CG1915-PA,CG1915-PC	2b	gi|24655827,gi|161080703	1	363
QLLFSTDPK	CG6058-PA,CG6058-PB,CG6058-PC,CG6058-PD,CG6058-PE,CG6058-PF,CG6058-PG,CG6058-PH	2b	gi|45551983,gi|24650278,gi|24650280,gi|24650282,gi|24650288,gi|24650276,gi|45551985,gi|45553577	1	57
QLQATLDQYAVAQR	CG5939-PA,CG5939-PB,CG5939-PC,CG5939-PD	2b	gi|24661112,gi|24661116,gi|24661120,gi|24661124	1	578
QLQHTLNEVQSK	CG17927-PA,CG17927-PB,CG17927-PC,CG17927-PD,CG17927-PE,CG17927-PF,CG17927-PG,CG17927-PH,CG17927-PI,CG17927-PJ,CG17927-PK,CG17927-PL,CG17927-PM	2b	gi|24584704,gi|24584710,gi|24584692,gi|24584702,gi|24584696,gi|24584700,gi|24584694,gi|28574239,gi|24584706,gi|24584698,gi|24584712,gi|24584714,gi|24584716	1	2330
QLSEQEGVSQQTTTR	CG5939-PA,CG5939-PB,CG5939-PC,CG5939-PD	2b	gi|24661112,gi|24661116,gi|24661120,gi|24661124	1	578
QLVADPDSLK	CG5261-PA,CG5261-PB	2b	gi|24582497,gi|20129315	1	69
QMTAVEGQDSEELK	CG9847-PA,CG9847-PB	2b	gi|17352457,gi|24657035	1	12
QNLEGQSFYNK	CG30084-PA,CG30084-PC,CG30084-PE,CG30084-PF,CG30084-PG,CG30084-PH	2b	gi|78707559,gi|78709100,gi|78707228,gi|161077121,gi|116007706,gi|161077123	1	100
QNTNAILELYEPK	CG17146-PA,CG17146-PB	2b	gi|17647141,gi|24663208	1	1
QPDPAPTVAQCSQPADPGQCDK	CG33103-PA,CG33103-PB	2b	gi|28572036,gi|28572038	0	438
QQAAIEQAQR	CG33484-PA,CG33484-PB,CG33484-PC,CG33484-PD	2b	gi|45580802,gi|116007758,gi|116007760,gi|116007762	0	226
QQNIQNVLGQK	CG17285-PA,CG17285-PB	2b	gi|24664081,gi|24664085	1	257
QQNYVSDISSPLIQDEGDNK	CG14207-PA,CG14207-PB	2b	gi|19920346,gi|24643312	1	22
QSLQLTELQAHYEDVQR	CG5939-PA,CG5939-PB,CG5939-PC,CG5939-PD	2b	gi|24661112,gi|24661116,gi|24661120,gi|24661124	1	578
QSTNETVVADTEYGQVR	CG1112-PA,CG1112-PB	2b	gi|17737817,gi|24644842	1	17
QTAFISPSNPASPNIVNR	CG17549-PA,CG17549-PB,CG17549-PC	2b	gi|28574364,gi|24585186,gi|24585188	1	17
QTDDGTYVCVASNGLGEPVR	CG33103-PA,CG33103-PB	2b	gi|28572036,gi|28572038	0	438
QTGTLGSGIK	CG12013-PA,CG12013-PB,CG12013-PC,CG12013-PD	2b	gi|24656777,gi|21356883,gi|24656767,gi|24656772	0	55
QTSIEIEQLNAR	CG5939-PA,CG5939-PB,CG5939-PC,CG5939-PD	2b	gi|24661112,gi|24661116,gi|24661120,gi|24661124	1	578
QTSVAPTSGSPTSVAGK	CG10737-PA,CG10737-PB,CG10737-PC,CG10737-PD,CG10737-PE	2b	gi|24655499,gi|24655485,gi|24655490,gi|24655495,gi|62471741	1	8
QVAANVAEASQR	CG1648-PA,CG1648-PB	2b	gi|19921938,gi|24652180	1	9
QVFLGGVDK	CG16944-PA,CG16944-PB,CG16944-PC,CG16944-PD	2b	gi|18079273,gi|24641095,gi|24641090,gi|24641092	1	349
QVGVGDAGR	CG33484-PA,CG33484-PB,CG33484-PC,CG33484-PD	2b	gi|45580802,gi|116007758,gi|116007760,gi|116007762	0	226
QVLAQIGQIEQR	CG17285-PA,CG17285-PB	2b	gi|24664081,gi|24664085	1	257
QVMEGFCK	CG12070-PA,CG12070-PB	2b	gi|17864128,gi|28571996	0	12
QVNEPYAPVLAEK	CG5014-PA,CG5014-PB,CG5014-PC,CG5014-PD	2b	gi|45554154,gi|18543325,gi|45554146,gi|45554137	1	15
QVQAEVPGSPIFVMK	CG11198-PA,CG11198-PB,CG11198-PC,CG11198-PD	2b	gi|24586458,gi|24586460,gi|161076407,gi|161076409	1	52
QVTLDVATPTNLGTPR	CG33950-PA,CG33950-PB,CG33950-PC,CG33950-PD,CG33950-PE,CG33950-PF,CG33950-PG	2b	gi|78706472,gi|78706470,gi|78706464,gi|78706466,gi|78706468,gi|78706474,gi|161077537	1	871
QVVQDNNIEQIDR	CG17285-PA,CG17285-PB	2b	gi|24664081,gi|24664085	1	257
QVYLHATEGSR	CG2139-PA,CG2139-PB,CG2139-PC,CG2139-PD	2b	gi|24651389,gi|45552009,gi|24651387,gi|24651391	1	61
RADGVNILNLGK	CG14792-PA,CG14792-PB,CG14792-PD	2b	gi|17136518,gi|24639112,gi|45551198	1	30
RANALQNELEESR	CG17927-PA,CG17927-PB,CG17927-PC,CG17927-PD,CG17927-PE,CG17927-PF,CG17927-PG,CG17927-PH,CG17927-PI,CG17927-PJ,CG17927-PK,CG17927-PL,CG17927-PM	2b	gi|24584704,gi|24584710,gi|24584692,gi|24584702,gi|24584696,gi|24584700,gi|24584694,gi|28574239,gi|24584706,gi|24584698,gi|24584712,gi|24584714,gi|24584716	1	2330
RCEQCAAGYQGNPLAAGGICR	CG33950-PA,CG33950-PB,CG33950-PC,CG33950-PD,CG33950-PE,CG33950-PF,CG33950-PG	2b	gi|78706472,gi|78706470,gi|78706464,gi|78706466,gi|78706468,gi|78706474,gi|161077537	1	871
RDDDNDDNDDDDDQDIR	CG17285-PA,CG17285-PB	2b	gi|24664081,gi|24664085	1	257
RDLEEANIQHESTLANLR	CG17927-PA,CG17927-PB,CG17927-PC,CG17927-PD,CG17927-PE,CG17927-PF,CG17927-PG,CG17927-PH,CG17927-PI,CG17927-PJ,CG17927-PK,CG17927-PL,CG17927-PM	2b	gi|24584704,gi|24584710,gi|24584692,gi|24584702,gi|24584696,gi|24584700,gi|24584694,gi|28574239,gi|24584706,gi|24584698,gi|24584712,gi|24584714,gi|24584716	1	2330
REEEETYITQAPR	CG1915-PA,CG1915-PC	2b	gi|24655827,gi|161080703	1	363
REEEEYTVTTAPVFVTK	CG1915-PA,CG1915-PC	2b	gi|24655827,gi|161080703	1	363
REEIDESTK	CG1915-PA,CG1915-PC	2b	gi|24655827,gi|161080703	0	363
RIGVFAEDEDTTGK	CG3725-PA,CG3725-PB,CG3725-PC,CG3725-PD,CG3725-PE,CG3725-PF,CG3725-PG,CG3725-PH	2b	gi|17136664,gi|24762445,gi|24762447,gi|24762449,gi|24762451,gi|24762453,gi|24762455,gi|24762457	1	581
RIQLLEEDLER	CG4898-PA,CG4898-PB,CG4898-PC,CG4898-PD,CG4898-PE,CG4898-PF,CG4898-PG,CG4898-PH,CG4898-PI,CG4898-PJ,CG4898-PK,CG4898-PL	2b	gi|24647089,gi|45551896,gi|24647085,gi|24647073,gi|45551900,gi|45551898,gi|24647075,gi|45551902,gi|45551904,gi|24647077,gi|45553377,gi|45553375	1	116
RLETAAGNLYK	CG7010-PA,CG7010-PB,CG7010-PC,CG7010-PD	2b	gi|28571106,gi|24639746,gi|24639740,gi|24639744	1	33
RLLEQQDEYQGQNIYGNQK	CG17285-PA,CG17285-PB	2b	gi|24664081,gi|24664085	1	257
RPDDDGGCEISGYALER	CG32019-PA,CG32019-PC,CG32019-PD,CG32019-PE	2b	gi|28558739,gi|45552151,gi|45552153,gi|45552149	1	787
RPDLDNNAYWGPTLK	CG15102-PA,CG15102-PB	2b	gi|24655327,gi|45552070	1	8
RPLPNNAR	CG33950-PA,CG33950-PB,CG33950-PC,CG33950-PD,CG33950-PE,CG33950-PF,CG33950-PG	2b	gi|78706472,gi|78706470,gi|78706464,gi|78706466,gi|78706468,gi|78706474,gi|161077537	0	871
RPLQDIGFVEEK	CG30084-PA,CG30084-PC,CG30084-PE,CG30084-PF,CG30084-PG,CG30084-PH	2b	gi|78707559,gi|78709100,gi|78707228,gi|161077121,gi|116007706,gi|161077123	1	100
RPSGVPLVYEAR	CG10924-PA,CG10924-PB	2b	gi|24655082,gi|161077226	1	21
RQIEEAEEIAALNLAK	CG17927-PA,CG17927-PB,CG17927-PC,CG17927-PD,CG17927-PE,CG17927-PF,CG17927-PG,CG17927-PH,CG17927-PI,CG17927-PJ,CG17927-PK,CG17927-PL,CG17927-PM	2b	gi|24584704,gi|24584710,gi|24584692,gi|24584702,gi|24584696,gi|24584700,gi|24584694,gi|28574239,gi|24584706,gi|24584698,gi|24584712,gi|24584714,gi|24584716	1	2330
RTALDEAER	CG4376-PA,CG4376-PB,CG4376-PC	2b	gi|24639238,gi|24639240,gi|17137758	0	241
RVDTTEEFPGLFR	CG11198-PA,CG11198-PB,CG11198-PC,CG11198-PD	2b	gi|24586458,gi|24586460,gi|161076407,gi|161076409	1	52
RVEEFNLK	CG7176-PA,CG7176-PB,CG7176-PC,CG7176-PD,CG7176-PE,CG7176-PF,CG7176-PG	2b	gi|24660860,gi|24660849,gi|21356561,gi|24660856,gi|24660864,gi|24660868,gi|28574947	0	35
RVLPEEDCVEEKPETEK	CG33103-PA,CG33103-PB	2b	gi|28572036,gi|28572038	0	438
RYFSCNTQDCPEEESDFR	CG33103-PA,CG33103-PB	2b	gi|28572036,gi|28572038	0	438
SADAELQQR	CG4260-PA,CG4260-PB	2b	gi|28574818,gi|45552169	1	35
SAFIQVLESSYR	CG2139-PA,CG2139-PB,CG2139-PC,CG2139-PD	2b	gi|24651389,gi|45552009,gi|24651387,gi|24651391	1	61
SAGPCTGFTK	CG33103-PA,CG33103-PB	2b	gi|28572036,gi|28572038	0	438
SASSTGANAGAGEDGK	CG14648-PA,CG14648-PB	2b	gi|21355167,gi|161078016	1	22
SCAQLETGVNVK	CG5625-PA,CG5625-PB	2b	gi|45550489,gi|45551149	1	4
SCAYMGEPGIEGDER	CG17218-PA,CG17218-PB	2b	gi|20129467,gi|24583865	1	4
SCDPDGPLMMYISK	CG2238-PA,CG2238-PB,CG2238-PC	2b	gi|24585709,gi|24585711,gi|24585713	1	30
SCIIAVVVPDTDVLK	CG3961-PA,CG3961-PB,CG3961-PC	2b	gi|24666497,gi|24666505,gi|24666501	1	20
SCRPPIDHVCELLPR	CG11567-PA,CG11567-PB	2b	gi|17137192,gi|24582192	1	177
SCSFSEFGCCPDAETSAK	CG33103-PA,CG33103-PB	2b	gi|28572036,gi|28572038	0	438
SCWIPDEK	CG17927-PA,CG17927-PB,CG17927-PC,CG17927-PD,CG17927-PE,CG17927-PF,CG17927-PG,CG17927-PH,CG17927-PI,CG17927-PJ,CG17927-PK,CG17927-PL,CG17927-PM	2b	gi|24584704,gi|24584710,gi|24584692,gi|24584702,gi|24584696,gi|24584700,gi|24584694,gi|28574239,gi|24584706,gi|24584698,gi|24584712,gi|24584714,gi|24584716	0	2330
SDAGASQDGVTCDPDEAGNYGK	CG7263-PA,CG7263-PB	2b	gi|24581020,gi|28573993	1	7
SDALTQMEATIKK	CG1915-PA,CG1915-PC	2b	gi|24655827,gi|161080703	1	363
SDASDTSTLIK	CG32019-PA,CG32019-PC,CG32019-PD,CG32019-PE	2b	gi|28558739,gi|45552151,gi|45552153,gi|45552149	1	787
SDFAQAVIDAGLR	CG1516-PA,CG1516-PB,CG1516-PD,CG1516-PE,CG1516-PG,CG1516-PI,CG1516-PJ,CG1516-PK,CG1516-PL	2b	gi|24652210,gi|24652212,gi|24652214,gi|19921944,gi|24652216,gi|24652218,gi|24652220,gi|24652222,gi|24652224	1	469
SDFLQALK	CG6455-PA,CG6455-PB	2b	gi|45549224,gi|24648875	0	49
SDGGAPISEYIIQK	CG32019-PA,CG32019-PC,CG32019-PD,CG32019-PE	2b	gi|28558739,gi|45552151,gi|45552153,gi|45552149	0	787
SDGGAPISGYIIEK	CG32019-PA,CG32019-PC,CG32019-PD,CG32019-PE	2b	gi|28558739,gi|45552151,gi|45552153,gi|45552149	0	787
SDGIVGLYR	CG16944-PA,CG16944-PB,CG16944-PC,CG16944-PD	2b	gi|18079273,gi|24641095,gi|24641090,gi|24641092	1	349
SDGPEYNVDGLVPGHDYK	CG32019-PA,CG32019-PC,CG32019-PD,CG32019-PE	2b	gi|28558739,gi|45552151,gi|45552153,gi|45552149	1	787
SDGSESDMALAMNR	CG10844-PA,CG10844-PB,CG10844-PC,CG10844-PD	2b	gi|17352465,gi|17352467,gi|17352469,gi|17352471	0	11
SDKDKTELALLFANQSEK	CG5946-PA,CG5946-PB,CG5946-PC,CG5946-PD	2b	gi|24662938,gi|24662934,gi|116007806,gi|116007804	1	3
SDPLTSDQPVVAK	CG32019-PA,CG32019-PC,CG32019-PD,CG32019-PE	2b	gi|28558739,gi|45552151,gi|45552153,gi|45552149	1	787
SDPYAIINVGAQEFK	CG6643-PA,CG6643-PB	2b	gi|24649705,gi|45552026	1	10
SDQANPTQGVR	CG15117-PA,CG15117-PB,CG15117-PC	2b	gi|19922582,gi|24655438,gi|62471735	0	2
SDSGEYLVTATNTSGK	CG32019-PA,CG32019-PC,CG32019-PD,CG32019-PE	2b	gi|28558739,gi|45552151,gi|45552153,gi|45552149	1	787
SDTEQALAGNDFDPFALR	CG3424-PA,CG3424-PC	2b	gi|21355283,gi|24661700	1	1
SDTGVYTLTAR	CG32019-PA,CG32019-PC,CG32019-PD,CG32019-PE	2b	gi|28558739,gi|45552151,gi|45552153,gi|45552149	1	787
SEDDLPLIAIDSFK	CG9911-PA,CG9911-PB,CG9911-PC,CG9911-PD	2b	gi|18860011,gi|24642439,gi|24642443,gi|24642441	1	3
SEDVIDLEGTAK	CG33103-PA,CG33103-PB	2b	gi|28572036,gi|28572038	0	438
SEELEEAK	CG17927-PA,CG17927-PB,CG17927-PC,CG17927-PD,CG17927-PE,CG17927-PF,CG17927-PG,CG17927-PH,CG17927-PI,CG17927-PJ,CG17927-PK,CG17927-PL,CG17927-PM	2b	gi|24584704,gi|24584710,gi|24584692,gi|24584702,gi|24584696,gi|24584700,gi|24584694,gi|28574239,gi|24584706,gi|24584698,gi|24584712,gi|24584714,gi|24584716	1	2330
SEELEEAKR	CG17927-PA,CG17927-PB,CG17927-PC,CG17927-PD,CG17927-PE,CG17927-PF,CG17927-PG,CG17927-PH,CG17927-PI,CG17927-PJ,CG17927-PK,CG17927-PL,CG17927-PM	2b	gi|24584704,gi|24584710,gi|24584692,gi|24584702,gi|24584696,gi|24584700,gi|24584694,gi|28574239,gi|24584706,gi|24584698,gi|24584712,gi|24584714,gi|24584716	0	2330
SEFVDEVVNIRPR	CG1915-PA,CG1915-PC	2b	gi|24655827,gi|161080703	1	363
SEIDLGDIK	CG5730-PA,CG5730-PB,CG5730-PC,CG5730-PD	2b	gi|17136266,gi|17136264,gi|45553447,gi|45553445	1	61
SEIDMTDIK	CG9968-PA,CG9968-PB	2b	gi|17736989,gi|24642523	1	7
SELDDLDSNQVAEEAPSAIVR	CG15009-PA,CG15009-PB,CG15009-PC	2b	gi|45549192,gi|24657376,gi|45551513	1	10
SEPIPESNDAPVK	CG8983-PA,CG8983-PB	2b	gi|45551086,gi|19922048	1	72
SEPTWSTEQQTEESSVK	CG2140-PA,CG2140-PB	2b	gi|24586293,gi|24586291	1	63
SEQLVEGAPYPR	CG9623-PA,CG9623-PB	2b	gi|24642643,gi|24642641	0	16
SEVGAPMPGTVIDIR	CG1516-PA,CG1516-PB,CG1516-PD,CG1516-PE,CG1516-PG,CG1516-PI,CG1516-PJ,CG1516-PK,CG1516-PL	2b	gi|24652210,gi|24652212,gi|24652214,gi|19921944,gi|24652216,gi|24652218,gi|24652220,gi|24652222,gi|24652224	1	469
SEYGCCPDGK	CG33103-PA,CG33103-PB	2b	gi|28572036,gi|28572038	0	438
SFEELCSSPIIEK	CG8732-PA,CG8732-PB,CG8732-PC,CG8732-PD,CG8732-PE,CG8732-PF,CG8732-PG,CG8732-PH,CG8732-PI	2b	gi|24586634,gi|22026970,gi|24586636,gi|62471689,gi|62471687,gi|62471685,gi|62471683,gi|62471681,gi|62471679	1	107
SFSTDLLVK	CG3861-PA,CG3861-PB	2b	gi|24640126,gi|24640124	1	71
SGECHEFEFTGCR	CG33103-PA,CG33103-PB	2b	gi|28572036,gi|28572038	0	438
SGQTTYTGVWDATK	CG2139-PA,CG2139-PB,CG2139-PC,CG2139-PD	2b	gi|24651389,gi|45552009,gi|24651387,gi|24651391	1	61
SGQVVPGYGHAVLR	CG3861-PA,CG3861-PB	2b	gi|24640126,gi|24640124	1	71
SGSSVPPILNR	CG1709-PA,CG1709-PB,CG1709-PC,CG1709-PD,CG1709-PE,CG1709-PF,CG1709-PG,CG1709-PH	2b	gi|24650959,gi|24650965,gi|24650956,gi|24650967,gi|21358171,gi|24650961,gi|24650963,gi|45551995	0	17
SGTFSSETFDDEVER	CG40084-PA,CG40084-PB	2b	gi|161076014,gi|161076016	1	4
SGVLVSLSEQNLVDCSTK	CG6692-PA,CG6692-PB,CG6692-PC	2b	gi|24653516,gi|24653518,gi|24653514	1	104
SGYEQDSQLSQELDR	CG1915-PA,CG1915-PC	2b	gi|24655827,gi|161080703	1	363
SIADCAILEPSPER	CG33484-PA,CG33484-PB,CG33484-PC,CG33484-PD	2b	gi|45580802,gi|116007758,gi|116007760,gi|116007762	0	226
SIESISGQHLR	CG3359-PB,CG3359-PC,CG3359-PD,CG3359-PE,CG3359-PF,CG3359-PG,CG3359-PH,CG3359-PI,CG3359-PJ,CG3359-PK,CG3359-PL,CG3359-PM,CG3359-PN,CG3359-PO,CG3359-PP	2b	gi|24646161,gi|24646163,gi|28573039,gi|28573041,gi|28573043,gi|28573045,gi|28573047,gi|28573049,gi|28573051,gi|28573053,gi|28573061,gi|28573055,gi|28573057,gi|28573059,gi|28573037	1	29
SILSMINAEVGCK	CG1640-PA,CG1640-PB,CG1640-PC,CG1640-PD,CG1640-PE,CG1640-PF	2b	gi|24641760,gi|45551451,gi|24641764,gi|24641766,gi|24641768,gi|24641770	1	25
SIYDEPATANER	CG6803-PA,CG6803-PB,CG6803-PC,CG6803-PD,CG6803-PE	2b	gi|24646989,gi|21357797,gi|24646991,gi|24646986,gi|24646984	1	71
SKGSLEDQVVQTNPVLEAFGNAK	CG17927-PA,CG17927-PB,CG17927-PC,CG17927-PD,CG17927-PE,CG17927-PF,CG17927-PG,CG17927-PH,CG17927-PI,CG17927-PJ,CG17927-PK,CG17927-PL,CG17927-PM	2b	gi|24584704,gi|24584710,gi|24584692,gi|24584702,gi|24584696,gi|24584700,gi|24584694,gi|28574239,gi|24584706,gi|24584698,gi|24584712,gi|24584714,gi|24584716	1	2330
SKYESDGVAR	CG17927-PA,CG17927-PB,CG17927-PC,CG17927-PD,CG17927-PE,CG17927-PF,CG17927-PG,CG17927-PH,CG17927-PI,CG17927-PJ,CG17927-PK,CG17927-PL,CG17927-PM	2b	gi|24584704,gi|24584710,gi|24584692,gi|24584702,gi|24584696,gi|24584700,gi|24584694,gi|28574239,gi|24584706,gi|24584698,gi|24584712,gi|24584714,gi|24584716	1	2330
SLAPGKPVDAEIK	CG9244-PB,CG9244-PC	2b	gi|17864292,gi|161076999	1	473
SLAPGKPVDAEIKNGDKVER	CG9244-PB,CG9244-PC	2b	gi|17864292,gi|161076999	0	473
SLDILEQR	CG10374-PA,CG10374-PB,CG10374-PC	2b	gi|45551956,gi|45551958,gi|45550802	1	3
SLESDLKGDTSGHFK	CG5730-PA,CG5730-PB,CG5730-PC,CG5730-PD	2b	gi|17136266,gi|17136264,gi|45553447,gi|45553445	1	61
SLESWIK	CG5730-PA,CG5730-PB,CG5730-PC,CG5730-PD	2b	gi|17136266,gi|17136264,gi|45553447,gi|45553445	1	61
SLFDSEEDAAQANK	CG17734-PA,CG17734-PB	2b	gi|21356421,gi|24645907	1	8
SLGLSVTTPGGSSGAPDSGR	CG8475-PA,CG8475-PB	2b	gi|24582722,gi|24582724	1	1
SLHDAGITWPTK	CG6206-PA,CG6206-PB	2b	gi|19921088,gi|24583443	1	68
SLLNDITVHAGK	CG32019-PA,CG32019-PC,CG32019-PD,CG32019-PE	2b	gi|28558739,gi|45552151,gi|45552153,gi|45552149	1	787
SLNLALR	CG12233-PA,CG12233-PB	2b	gi|24643268,gi|24643270	0	132
SLNQATDFFEVVEK	CG33484-PA,CG33484-PB,CG33484-PC,CG33484-PD	2b	gi|45580802,gi|116007758,gi|116007760,gi|116007762	0	226
SLNVAQENVDK	CG1041-PA,CG1041-PB	2b	gi|45550701,gi|116007970	0	3
SLPSVETLGCTSVICSDK	CG3725-PA,CG3725-PB,CG3725-PC,CG3725-PD,CG3725-PE,CG3725-PF,CG3725-PG,CG3725-PH	2b	gi|17136664,gi|24762445,gi|24762447,gi|24762449,gi|24762451,gi|24762453,gi|24762455,gi|24762457	1	581
SLSSSDILDLR	CG32019-PA,CG32019-PC,CG32019-PD,CG32019-PE	2b	gi|28558739,gi|45552151,gi|45552153,gi|45552149	1	787
SLSSSPAR	CG33950-PA,CG33950-PB,CG33950-PC,CG33950-PD,CG33950-PE,CG33950-PF,CG33950-PG	2b	gi|78706472,gi|78706470,gi|78706464,gi|78706466,gi|78706468,gi|78706474,gi|161077537	0	871
SLTLLVPK	CG3359-PB,CG3359-PC,CG3359-PD,CG3359-PE,CG3359-PF,CG3359-PG,CG3359-PH,CG3359-PI,CG3359-PJ,CG3359-PK,CG3359-PL,CG3359-PM,CG3359-PN,CG3359-PO,CG3359-PP	2b	gi|24646161,gi|24646163,gi|28573039,gi|28573041,gi|28573043,gi|28573045,gi|28573047,gi|28573049,gi|28573051,gi|28573053,gi|28573061,gi|28573055,gi|28573057,gi|28573059,gi|28573037	0	29
SMASISPEGK	CG11567-PA,CG11567-PB	2b	gi|17137192,gi|24582192	0	177
SMCPNAWVEK	CG14235-PA,CG14235-PB,CG14235-PC	2b	gi|24643375,gi|24643377,gi|24643379	1	12
SMILDTQHPDALEK	CG1915-PA,CG1915-PC	2b	gi|24655827,gi|161080703	1	363
SMQGYPFNPCLTEAQYK	CG32031-PA,CG32031-PB,CG32031-PC,CG32031-PD,CG32031-PE,CG32031-PF	2b	gi|24661336,gi|24661340,gi|24661344,gi|24661348,gi|161082598,gi|161082600	1	143
SMSSYCTPLK	CG3725-PA,CG3725-PB,CG3725-PC,CG3725-PD,CG3725-PE,CG3725-PF,CG3725-PG,CG3725-PH	2b	gi|17136664,gi|24762445,gi|24762447,gi|24762449,gi|24762451,gi|24762453,gi|24762455,gi|24762457	1	581
SNDLPANMPASLK	CG9261-PA,CG9261-PC,CG9261-PD,CG9261-PE,CG9261-PF	2b	gi|17137214,gi|17137212,gi|24582331,gi|62471617,gi|62471615	1	6
SNFFDLECK	CG13586-PA,CG13586-PB	2b	gi|21687155,gi|116007742	1	2
SPDTATLLGIVSR	CG4001-PA,CG4001-PB,CG4001-PC	2b	gi|17647809,gi|24652337,gi|28573326	1	10
SPFSEMSEGSEFQR	CG11661-PA,CG11661-PB,CG11661-PC,CG11661-PE,CG11661-PF,CG11661-PG,CG11661-PH,CG11661-PI	2b	gi|24665669,gi|24665673,gi|24665677,gi|28574585,gi|28574590,gi|28574592,gi|161084450,gi|161084461	1	218
SPSISQATQYEGGGTK	CG3539-PC,CG3539-PD	2b	gi|45552183,gi|45552181	1	2
SQCAETLFGCCPDK	CG33103-PA,CG33103-PB	2b	gi|28572036,gi|28572038	0	438
SQINFPIGGATER	CG4094-PA,CG4094-PB	2b	gi|24640177,gi|24640179	1	30
SQQDEERMDQLTNQLK	CG4843-PA,CG4843-PB,CG4843-PC	2b	gi|28571726,gi|24647095,gi|45551906	1	131
SQTAAASEDTIFGK	CG2862-PA,CG2862-PB	2b	gi|28574010,gi|24581222	1	4
SQVQQLSR	CG3861-PA,CG3861-PB	2b	gi|24640126,gi|24640124	1	71
SQVVPSVANTYSVEIK	CG33950-PA,CG33950-PB,CG33950-PC,CG33950-PD,CG33950-PE,CG33950-PF,CG33950-PG	2b	gi|78706472,gi|78706470,gi|78706464,gi|78706466,gi|78706468,gi|78706474,gi|161077537	0	871
SRPVAAVNAETSFASNSK	CG9623-PA,CG9623-PB	2b	gi|24642643,gi|24642641	1	16
SSAQAVQETLNDFSK	CG33484-PA,CG33484-PB,CG33484-PC,CG33484-PD	2b	gi|45580802,gi|116007758,gi|116007760,gi|116007762	0	226
SSASPLNTAGAAAGGPR	CG10737-PA,CG10737-PB,CG10737-PC,CG10737-PD,CG10737-PE	2b	gi|24655499,gi|24655485,gi|24655490,gi|24655495,gi|62471741	1	8
SSFNHFDK	CG4376-PA,CG4376-PB,CG4376-PC	2b	gi|24639238,gi|24639240,gi|17137758	0	241
SSGAYIFRPNENK	CG6206-PA,CG6206-PB	2b	gi|19921088,gi|24583443	1	68
SSICDGNPDCSDASDEQSCSLGLK	CG33950-PA,CG33950-PB,CG33950-PC,CG33950-PD,CG33950-PE,CG33950-PF,CG33950-PG	2b	gi|78706472,gi|78706470,gi|78706464,gi|78706466,gi|78706468,gi|78706474,gi|161077537	0	871
SSIIHETQHEEALTK	CG1915-PA,CG1915-PC	2b	gi|24655827,gi|161080703	0	363
SSLILDSQLPR	CG1915-PA,CG1915-PC	2b	gi|24655827,gi|161080703	0	363
SSNCMVPINDIR	CG9325-PA,CG9325-PB,CG9325-PC,CG9325-PD,CG9325-PE,CG9325-PF	2b	gi|17136738,gi|24655667,gi|24655690,gi|24655685,gi|24655672,gi|24655677	1	30
SSPDIIPGGEWTSR	CG4260-PA,CG4260-PB	2b	gi|28574818,gi|45552169	1	35
SSQMFHSTLLK	CG3082-PA,CG3082-PB,CG3082-PC,CG3082-PD	2b	gi|24659015,gi|24659021,gi|19922796,gi|24659033	0	6
SSQSSVEIIER	CG33484-PA,CG33484-PB,CG33484-PC,CG33484-PD	2b	gi|45580802,gi|116007758,gi|116007760,gi|116007762	0	226
SSSKPDPYLVCSVNK	CG6643-PA,CG6643-PB	2b	gi|24649705,gi|45552026	1	10
STEPQVDVTGLSPGNEYK	CG32019-PA,CG32019-PC,CG32019-PD,CG32019-PE	2b	gi|28558739,gi|45552151,gi|45552153,gi|45552149	1	787
STGAEDEEPEWVANER	CG9148-PA,CG9148-PB,CG9148-PC	2b	gi|17137602,gi|17137604,gi|45552855	1	8
STLTDSLVSK	CG2238-PA,CG2238-PB,CG2238-PC	2b	gi|24585709,gi|24585711,gi|24585713	1	30
STNPAPVANK	CG4389-PA,CG4389-PB,CG4389-PC	2b	gi|19921000,gi|24583077,gi|24583079	0	210
STQVDTQLYPVFTSQSVDSK	CG33484-PA,CG33484-PB,CG33484-PC,CG33484-PD	2b	gi|45580802,gi|116007758,gi|116007760,gi|116007762	0	226
SVAVYSEQDK	CG1516-PA,CG1516-PB,CG1516-PD,CG1516-PE,CG1516-PG,CG1516-PI,CG1516-PJ,CG1516-PK,CG1516-PL	2b	gi|24652210,gi|24652212,gi|24652214,gi|19921944,gi|24652216,gi|24652218,gi|24652220,gi|24652222,gi|24652224	1	469
SVGIISEGNETVEDIAQR	CG5670-PA,CG5670-PB,CG5670-PC,CG5670-PD,CG5670-PE,CG5670-PF,CG5670-PG,CG5670-PH	2b	gi|24648576,gi|24648578,gi|24648580,gi|24648582,gi|45553441,gi|45553439,gi|45553437,gi|45553435	1	209
SVNCDEEKVEPLSEK	CG33103-PA,CG33103-PB	2b	gi|28572036,gi|28572038	1	438
SVTETGVELSNEER	CG17870-PA,CG17870-PB,CG17870-PC,CG17870-PD,CG17870-PE,CG17870-PF,CG17870-PG,CG17870-PH,CG17870-PI,CG17870-PJ	2b	gi|24652326,gi|24652328,gi|45551063,gi|24652322,gi|24652324,gi|45551065,gi|28573324,gi|45552539,gi|62471697,gi|62471695	1	19
SVTQAVQK	CG33113-PA,CG33113-PB,CG33113-PC,CG33113-PD,CG33113-PE,CG33113-PF,CG33113-PG	2b	gi|28574668,gi|28574662,gi|28574670,gi|28574666,gi|28574664,gi|28574660,gi|45552215	0	56
SWSNQSILTR	CG17896-PA,CG17896-PB	2b	gi|24638878,gi|24638876	1	16
SYGGNLR	CG33950-PA,CG33950-PB,CG33950-PC,CG33950-PD,CG33950-PE,CG33950-PF,CG33950-PG	2b	gi|78706472,gi|78706470,gi|78706464,gi|78706466,gi|78706468,gi|78706474,gi|161077537	0	871
SYGGTGTLR	CG33950-PA,CG33950-PB,CG33950-PC,CG33950-PD,CG33950-PE,CG33950-PF,CG33950-PG	2b	gi|78706472,gi|78706470,gi|78706464,gi|78706466,gi|78706468,gi|78706474,gi|161077537	1	871
SYPYEAIDDSCHFNK	CG6692-PA,CG6692-PB,CG6692-PC	2b	gi|24653516,gi|24653518,gi|24653514	1	104
TAAEIETER	CG7361-PA,CG7361-PB	2b	gi|17864350,gi|24580896	1	18
TAAYVNSIEK	CG5320-PA,CG5320-PB,CG5320-PE,CG5320-PF	2b	gi|45549226,gi|24649460,gi|45553473,gi|45553475	1	156
TAFQLFDR	CG2139-PA,CG2139-PB,CG2139-PC,CG2139-PD	2b	gi|24651389,gi|45552009,gi|24651387,gi|24651391	1	61
TAGELADMLGAGSGK	CG3359-PB,CG3359-PC,CG3359-PD,CG3359-PE,CG3359-PF,CG3359-PG,CG3359-PH,CG3359-PI,CG3359-PJ,CG3359-PK,CG3359-PL,CG3359-PM,CG3359-PN,CG3359-PO,CG3359-PP	2b	gi|24646161,gi|24646163,gi|28573039,gi|28573041,gi|28573043,gi|28573045,gi|28573047,gi|28573049,gi|28573051,gi|28573053,gi|28573061,gi|28573055,gi|28573057,gi|28573059,gi|28573037	0	29
TALLDSLSGEK	CG17927-PA,CG17927-PB,CG17927-PC,CG17927-PD,CG17927-PE,CG17927-PF,CG17927-PG,CG17927-PH,CG17927-PI,CG17927-PJ,CG17927-PK,CG17927-PL,CG17927-PM	2b	gi|24584704,gi|24584710,gi|24584692,gi|24584702,gi|24584696,gi|24584700,gi|24584694,gi|28574239,gi|24584706,gi|24584698,gi|24584712,gi|24584714,gi|24584716	1	2330
TALTHYLEITAIPR	CG11567-PA,CG11567-PB	2b	gi|17137192,gi|24582192	1	177
TAPGDSGLYEVIAQNPEGSTASK	CG33519-PB,CG33519-PC	2b	gi|161077453,gi|161077455	1	65
TAVQVANDLASGK	CG4389-PA,CG4389-PB,CG4389-PC	2b	gi|19921000,gi|24583077,gi|24583079	1	210
TAVQVANDLASGKLRVNR	CG4389-PA,CG4389-PB,CG4389-PC	2b	gi|19921000,gi|24583077,gi|24583079	0	210
TCGIIENICVYGDPTK	CG8732-PA,CG8732-PB,CG8732-PC,CG8732-PD,CG8732-PE,CG8732-PF,CG8732-PG,CG8732-PH,CG8732-PI	2b	gi|24586634,gi|22026970,gi|24586636,gi|62471689,gi|62471687,gi|62471685,gi|62471683,gi|62471681,gi|62471679	1	107
TCQQTYDTMNNLTSK	CG8048-PA,CG8048-PB,CG8048-PC,CG8048-PD	2b	gi|17137392,gi|19549828,gi|24654128,gi|28573773	1	6
TCYAQQSQVR	CG2168-PA,CG2168-PB,CG2168-PD	2b	gi|17864162,gi|24638499,gi|24638501	1	33
TDDPNPECNVEGLK	CG32019-PA,CG32019-PC,CG32019-PD,CG32019-PE	2b	gi|28558739,gi|45552151,gi|45552153,gi|45552149	1	787
TDEIVLIGGNDNITNDVTR	CG32593-PA,CG32593-PB,CG32593-PC,CG32593-PD,CG32593-PE,CG32593-PF	2b	gi|24642027,gi|24642031,gi|24642061,gi|24642065,gi|24642029,gi|24642033	1	32
TDELVESAGEIIYK	CG1519-PA,CG1519-PB	2b	gi|24652204,gi|28573936	1	4
TDGIFNGLGPVDGK	CG6148-PA,CG6148-PB	2b	gi|24646379,gi|24646381	1	16
TDPDTLTADEYGPFAR	CG4067-PA,CG4067-PB,CG4067-PC,CG4067-PD	2b	gi|17137370,gi|45551871,gi|24645718,gi|62472483	1	5
TDSQILVLTNLRPEDAGR	CG33950-PA,CG33950-PB,CG33950-PC,CG33950-PD,CG33950-PE,CG33950-PF,CG33950-PG	2b	gi|78706472,gi|78706470,gi|78706464,gi|78706466,gi|78706468,gi|78706474,gi|161077537	1	871
TDTNDDGKYSCEFDGVSK	CG31605-PA,CG31605-PB,CG31605-PC,CG31605-PD,CG31605-PE,CG31605-PF,CG31605-PG,CG31605-PH,CG31605-PI	2b	gi|24582681,gi|24582683,gi|24582685,gi|24582687,gi|24582689,gi|24582691,gi|161076803,gi|24582693,gi|24582695	1	4
TDVCEAGFFNMLAR	CG33950-PA,CG33950-PB,CG33950-PC,CG33950-PD,CG33950-PE,CG33950-PF,CG33950-PG	2b	gi|78706472,gi|78706470,gi|78706464,gi|78706466,gi|78706468,gi|78706474,gi|161077537	0	871
TELQEIPEHLR	CG4247-PA,CG4247-PB,CG4247-PC	2b	gi|28571716,gi|24647027,gi|161078308	0	4
TELSETMTELVK	CG11779-PA,CG11779-PB,CG11779-PC,CG11779-PD	2b	gi|24648138,gi|24648140,gi|78706782,gi|78706780	1	4
TEMSETEEIK	CG3725-PA,CG3725-PB,CG3725-PC,CG3725-PD,CG3725-PE,CG3725-PF,CG3725-PG,CG3725-PH	2b	gi|17136664,gi|24762445,gi|24762447,gi|24762449,gi|24762451,gi|24762453,gi|24762455,gi|24762457	1	581
TEMSETEEIKTPLQQK	CG3725-PA,CG3725-PB,CG3725-PC,CG3725-PD,CG3725-PE,CG3725-PF,CG3725-PG,CG3725-PH	2b	gi|17136664,gi|24762445,gi|24762447,gi|24762449,gi|24762451,gi|24762453,gi|24762455,gi|24762457	1	581
TEYVDGVDEVQR	CG33715-PB,CG33715-PD,CG33715-PE	2b	gi|161076702,gi|161076705,gi|78706840	1	109
TFANPEDLMSPK	CG1742-PA,CG1742-PB	2b	gi|24643618,gi|24643616	1	34
TFDNDGLIDGDK	CG2184-PA,CG2184-PB	2b	gi|17933672,gi|45552007	1	196
TFDNDGLIDGDKFR	CG2184-PA,CG2184-PB	2b	gi|17933672,gi|45552007	1	196
TFEADGHDFCLAQSFAK	CG4233-PA,CG4233-PB,CG4233-PC	2b	gi|24580970,gi|24580972,gi|19920542	1	88
TFLVWCNEEDHLR	CG32031-PA,CG32031-PB,CG32031-PC,CG32031-PD,CG32031-PE,CG32031-PF	2b	gi|24661336,gi|24661340,gi|24661344,gi|24661348,gi|161082598,gi|161082600	1	143
TFTANCVNGIQANR	CG4094-PA,CG4094-PB	2b	gi|24640177,gi|24640179	1	30
TFTAWCNSHLR	CG4376-PA,CG4376-PB,CG4376-PC	2b	gi|24639238,gi|24639240,gi|17137758	0	241
TFVTTSTVPGSQVYIQETTR	CG5939-PA,CG5939-PB,CG5939-PC,CG5939-PD	2b	gi|24661112,gi|24661116,gi|24661120,gi|24661124	1	578
TGAAPDVDINNIK	CG8036-PB,CG8036-PC,CG8036-PD	2b	gi|45550715,gi|45551847,gi|24645119	1	18
TGDIGEIQADGVLK	CG8732-PA,CG8732-PB,CG8732-PC,CG8732-PD,CG8732-PE,CG8732-PF,CG8732-PG,CG8732-PH,CG8732-PI	2b	gi|24586634,gi|22026970,gi|24586636,gi|62471689,gi|62471687,gi|62471685,gi|62471683,gi|62471681,gi|62471679	1	107
TGDSVVVVTGWK	CG7070-PA,CG7070-PB	2b	gi|28571814,gi|24648964	1	38
TGEADIFAAK	CG11522-PA,CG11522-PB	2b	gi|24651668,gi|21357161	1	22
TGEELQAAEDK	CG17927-PA,CG17927-PB,CG17927-PC,CG17927-PD,CG17927-PE,CG17927-PF,CG17927-PG,CG17927-PH,CG17927-PI,CG17927-PJ,CG17927-PK,CG17927-PL,CG17927-PM	2b	gi|24584704,gi|24584710,gi|24584692,gi|24584702,gi|24584696,gi|24584700,gi|24584694,gi|28574239,gi|24584706,gi|24584698,gi|24584712,gi|24584714,gi|24584716	1	2330
TGEELQAAEDKINHLNK	CG17927-PA,CG17927-PB,CG17927-PC,CG17927-PD,CG17927-PE,CG17927-PF,CG17927-PG,CG17927-PH,CG17927-PI,CG17927-PJ,CG17927-PK,CG17927-PL,CG17927-PM	2b	gi|24584704,gi|24584710,gi|24584692,gi|24584702,gi|24584696,gi|24584700,gi|24584694,gi|28574239,gi|24584706,gi|24584698,gi|24584712,gi|24584714,gi|24584716	1	2330
TGGPLTVCDIR	CG8732-PA,CG8732-PB,CG8732-PC,CG8732-PD,CG8732-PE,CG8732-PF,CG8732-PG,CG8732-PH,CG8732-PI	2b	gi|24586634,gi|22026970,gi|24586636,gi|62471689,gi|62471687,gi|62471685,gi|62471683,gi|62471681,gi|62471679	1	107
TGLPALEEK	CG9453-PA,CG9453-PB,CG9453-PC,CG9453-PD,CG9453-PE,CG9453-PF,CG9453-PG,CG9453-PH,CG9453-PI,CG9453-PJ,CG9453-PK	2b	gi|24586107,gi|24586105,gi|24586104,gi|45552477,gi|45552475,gi|45552473,gi|45552471,gi|45552469,gi|45552467,gi|45552465,gi|45552463	0	6
TGTLTTNQMSVSR	CG3725-PA,CG3725-PB,CG3725-PC,CG3725-PD,CG3725-PE,CG3725-PF,CG3725-PG,CG3725-PH	2b	gi|17136664,gi|24762445,gi|24762447,gi|24762449,gi|24762451,gi|24762453,gi|24762455,gi|24762457	1	581
TIAMDGTEGLVR	CG11154-PA,CG11154-PB	2b	gi|24638766,gi|24638768	1	585
TIAQFYEQSFGK	CG5730-PA,CG5730-PB,CG5730-PC,CG5730-PD	2b	gi|17136266,gi|17136264,gi|45553447,gi|45553445	1	61
TIIQNPSEAQR	CG10576-PA,CG10576-PB	2b	gi|24658585,gi|24658590	1	6
TIPGSTIFYPSDAVSTER	CG8036-PB,CG8036-PC,CG8036-PD	2b	gi|45550715,gi|45551847,gi|24645119	1	18
TIVYETGPVAPASEFK	CG33484-PA,CG33484-PB,CG33484-PC,CG33484-PD	2b	gi|45580802,gi|116007758,gi|116007760,gi|116007762	0	226
TKEQLEEEK	CG7107-PA,CG7107-PB,CG7107-PD,CG7107-PE,CG7107-PF,CG7107-PG	2b	gi|24641813,gi|24641811,gi|24641815,gi|62473677,gi|62473664,gi|62473654	0	236
TLADAEGDVLR	CG17896-PA,CG17896-PB	2b	gi|24638878,gi|24638876	1	16
TLAQMQLNEETSNSNQG	CG11198-PA,CG11198-PB,CG11198-PC,CG11198-PD	2b	gi|24586458,gi|24586460,gi|161076407,gi|161076409	1	52
TLDLDTLDAQR	CG1915-PA,CG1915-PC	2b	gi|24655827,gi|161080703	0	363
TLEAVEGEPFMLK	CG1634-PA,CG1634-PB,CG1634-PC	2b	gi|17530861,gi|24640619,gi|45554534	1	11
TLFEVQPLMEK	CG1803-PA,CG1803-PB,CG1803-PC,CG1803-PD	2b	gi|24641469,gi|24641471,gi|18860103,gi|45551448	1	5
TLIDQESVR	CG34415-PC,CG34415-PD	2b	gi|161077186,gi|45552677	0	4
TLLEQADR	CG17927-PA,CG17927-PB,CG17927-PC,CG17927-PD,CG17927-PE,CG17927-PF,CG17927-PG,CG17927-PH,CG17927-PI,CG17927-PJ,CG17927-PK,CG17927-PL,CG17927-PM	2b	gi|24584704,gi|24584710,gi|24584692,gi|24584702,gi|24584696,gi|24584700,gi|24584694,gi|28574239,gi|24584706,gi|24584698,gi|24584712,gi|24584714,gi|24584716	1	2330
TLLSDIYDTSESPGK	CG10279-PA,CG10279-PB,CG10279-PC,CG10279-PD,CG10279-PE,CG10279-PF	2b	gi|24644479,gi|45551833,gi|24644485,gi|24644481,gi|24644483,gi|24644487	1	3
TLQNELDDLANTQGTADK	CG15792-PA,CG15792-PB,CG15792-PC,CG15792-PD	2b	gi|24762816,gi|24762818,gi|62471820,gi|62471805	1	10
TLQQAGQVWYPDSSYK	CG11198-PA,CG11198-PB,CG11198-PC,CG11198-PD	2b	gi|24586458,gi|24586460,gi|161076407,gi|161076409	1	52
TLYAPFECTTTMR	CG1516-PA,CG1516-PB,CG1516-PD,CG1516-PE,CG1516-PG,CG1516-PI,CG1516-PJ,CG1516-PK,CG1516-PL	2b	gi|24652210,gi|24652212,gi|24652214,gi|19921944,gi|24652216,gi|24652218,gi|24652220,gi|24652222,gi|24652224	1	469
TLYDDVDVVTIR	CG12233-PA,CG12233-PB	2b	gi|24643268,gi|24643270	1	132
TLYSPVDYVDTWK	CG6084-PA,CG6084-PB	2b	gi|24662781,gi|24662785	1	3
TMELDSGEYTCVAR	CG1634-PA,CG1634-PB,CG1634-PC	2b	gi|17530861,gi|24640619,gi|45554534	1	11
TNEDFFEEDGQR	CG8732-PA,CG8732-PB,CG8732-PC,CG8732-PD,CG8732-PE,CG8732-PF,CG8732-PG,CG8732-PH,CG8732-PI	2b	gi|24586634,gi|22026970,gi|24586636,gi|62471689,gi|62471687,gi|62471685,gi|62471683,gi|62471681,gi|62471679	1	107
TNEVVAR	CG2171-PA,CG2171-PB,CG2171-PC	2b	gi|28572004,gi|28572006,gi|28572008	0	22
TNEWIDVHDPATNQVVTR	CG17896-PA,CG17896-PB	2b	gi|24638878,gi|24638876	1	16
TNIDLQK	CG5939-PA,CG5939-PB,CG5939-PC,CG5939-PD	2b	gi|24661112,gi|24661116,gi|24661120,gi|24661124	1	578
TNLPVFK	CG6359-PA,CG6359-PB	2b	gi|21357265,gi|24646345	1	1
TNNFNVDSLR	CG6904-PA,CG6904-PB,CG6904-PC	2b	gi|45551893,gi|21357845,gi|24646982	1	27
TNTEPAFLVSLK	CG33519-PB,CG33519-PC	2b	gi|161077453,gi|161077455	0	65
TPAAEFSDYSSEIDER	CG33484-PA,CG33484-PB,CG33484-PC,CG33484-PD	2b	gi|45580802,gi|116007758,gi|116007760,gi|116007762	1	226
TPDIGGTNSSTDVVENILK	CG5028-PA,CG5028-PB,CG5028-PC,CG5028-PD,CG5028-PE	2b	gi|24650122,gi|161078633,gi|161078635,gi|161078637,gi|161078639	1	59
TPDSVAEGK	CG10097-PA,CG10097-PB	2b	gi|24646271,gi|78706758	0	80
TPEADVTGLTEGK	CG32019-PA,CG32019-PC,CG32019-PD,CG32019-PE	2b	gi|28558739,gi|45552151,gi|45552153,gi|45552149	1	787
TPIQNQLDLR	CG1915-PA,CG1915-PC	2b	gi|24655827,gi|161080703	1	363
TPLDDGGSPITNYVVEK	CG32019-PA,CG32019-PC,CG32019-PD,CG32019-PE	2b	gi|28558739,gi|45552151,gi|45552153,gi|45552149	1	787
TPTTLPLSAAVLPTSDK	CG10844-PA,CG10844-PB,CG10844-PC,CG10844-PD	2b	gi|17352465,gi|17352467,gi|17352469,gi|17352471	1	11
TPVDPYPTDPWGDR	CG7899-PA,CG7899-PB	2b	gi|17864600,gi|24651231	1	2
TPVHPNDHVNK	CG4094-PA,CG4094-PB	2b	gi|24640177,gi|24640179	1	30
TQAPVVSYPGDAR	CG33103-PA,CG33103-PB	2b	gi|28572036,gi|28572038	1	438
TQEIAVQEQEIMR	CG8200-PA,CG8200-PB	2b	gi|17137546,gi|24653894	1	28
TQLPTTIEER	CG34343-PB,CG34343-PC,CG34343-PD	2b	gi|161076968,gi|45552415,gi|161076970	0	2
TQNLENKPFVEPQYDIEEISK	CG1915-PA,CG1915-PC	2b	gi|24655827,gi|161080703	1	363
TREEIQEVR	CG7010-PA,CG7010-PB,CG7010-PC,CG7010-PD	2b	gi|28571106,gi|24639746,gi|24639740,gi|24639744	1	33
TSANDTEFDVK	CG32019-PA,CG32019-PC,CG32019-PD,CG32019-PE	2b	gi|28558739,gi|45552151,gi|45552153,gi|45552149	1	787
TSAPSTEQGRPEPPTSAAAPAEAK	CG4035-PA,CG4035-PB,CG4035-PC,CG4035-PD,CG4035-PE,CG4035-PF,CG4035-PG	2b	gi|24661546,gi|17864468,gi|24661542,gi|24661553,gi|24661557,gi|24661561,gi|24661565	1	21
TSRPNTCVIYDNEEPFTIGR	CG8036-PB,CG8036-PC,CG8036-PD	2b	gi|45550715,gi|45551847,gi|24645119	1	18
TSWGSDGQF	CG14792-PA,CG14792-PB,CG14792-PD	2b	gi|17136518,gi|24639112,gi|45551198	1	30
TTESSNDVVEVATEGK	CG1910-PA,CG1910-PB,CG1910-PC,CG1910-PD	2b	gi|21356979,gi|24651733,gi|24651731,gi|24651735	1	3
TVDGYLLR	CG2168-PA,CG2168-PB,CG2168-PD	2b	gi|17864162,gi|24638499,gi|24638501	1	33
TVDIVERPDYK	CG10078-PA,CG10078-PB	2b	gi|24659604,gi|24659598	1	5
TVDQYYYGSETK	CG6206-PA,CG6206-PB	2b	gi|19921088,gi|24583443	1	68
TVEAEAAHGTVTR	CG7176-PA,CG7176-PB,CG7176-PC,CG7176-PD,CG7176-PE,CG7176-PF,CG7176-PG	2b	gi|24660860,gi|24660849,gi|21356561,gi|24660856,gi|24660864,gi|24660868,gi|28574947	1	35
TVELQYEEAASR	CG5939-PA,CG5939-PB,CG5939-PC,CG5939-PD	2b	gi|24661112,gi|24661116,gi|24661120,gi|24661124	1	578
TVEQSLNFFGTDPER	CG3725-PA,CG3725-PB,CG3725-PC,CG3725-PD,CG3725-PE,CG3725-PF,CG3725-PG,CG3725-PH	2b	gi|17136664,gi|24762445,gi|24762447,gi|24762449,gi|24762451,gi|24762453,gi|24762455,gi|24762457	1	581
TVEQSLNFFGTDPERGLTLDQIK	CG3725-PA,CG3725-PB,CG3725-PC,CG3725-PD,CG3725-PE,CG3725-PF,CG3725-PG,CG3725-PH	2b	gi|17136664,gi|24762445,gi|24762447,gi|24762449,gi|24762451,gi|24762453,gi|24762455,gi|24762457	1	581
TVEVEMPADPANLDSEAK	CG11198-PA,CG11198-PB,CG11198-PC,CG11198-PD	2b	gi|24586458,gi|24586460,gi|161076407,gi|161076409	1	52
TVGESILYFGCR	CG11567-PA,CG11567-PB	2b	gi|17137192,gi|24582192	1	177
TVIITGANSGIGK	CG7675-PA,CG7675-PB,CG7675-PC	2b	gi|24647948,gi|24647946,gi|45553409	1	8
TVNDIPINSTVYTVPSLK	CG32019-PA,CG32019-PC,CG32019-PD,CG32019-PE	2b	gi|28558739,gi|45552151,gi|45552153,gi|45552149	1	787
TVQVPMMSLK	CG9453-PA,CG9453-PB,CG9453-PC,CG9453-PD,CG9453-PE,CG9453-PF,CG9453-PG,CG9453-PH,CG9453-PI,CG9453-PJ,CG9453-PK	2b	gi|24586107,gi|24586105,gi|24586104,gi|45552477,gi|45552475,gi|45552473,gi|45552471,gi|45552469,gi|45552467,gi|45552465,gi|45552463	0	6
TVSDISNSWK	CG4376-PA,CG4376-PB,CG4376-PC	2b	gi|24639238,gi|24639240,gi|17137758	1	241
TVSEYSAYWEQTR	CG1516-PA,CG1516-PB,CG1516-PD,CG1516-PE,CG1516-PG,CG1516-PI,CG1516-PJ,CG1516-PK,CG1516-PL	2b	gi|24652210,gi|24652212,gi|24652214,gi|19921944,gi|24652216,gi|24652218,gi|24652220,gi|24652222,gi|24652224	1	469
TVTPADDDSK	CG33103-PA,CG33103-PB	2b	gi|28572036,gi|28572038	0	438
TYDLEALPTANQK	CG11198-PA,CG11198-PB,CG11198-PC,CG11198-PD	2b	gi|24586458,gi|24586460,gi|161076407,gi|161076409	1	52
TYPDSQIIK	CG33950-PA,CG33950-PB,CG33950-PC,CG33950-PD,CG33950-PE,CG33950-PF,CG33950-PG	2b	gi|78706472,gi|78706470,gi|78706464,gi|78706466,gi|78706468,gi|78706474,gi|161077537	0	871
TYTTINPLTPELGAQLR	CG12908-PA,CG12908-PB	2b	gi|24652408,gi|45552547	1	41
VAAEVAAPLSQAK	CG8200-PA,CG8200-PB	2b	gi|17137546,gi|24653894	1	28
VAAIEAGVPIVPGTDGPVTTK	CG1516-PA,CG1516-PB,CG1516-PD,CG1516-PE,CG1516-PG,CG1516-PI,CG1516-PJ,CG1516-PK,CG1516-PL	2b	gi|24652210,gi|24652212,gi|24652214,gi|19921944,gi|24652216,gi|24652218,gi|24652220,gi|24652222,gi|24652224	1	469
VAAIYEPPQESTR	CG4673-PA,CG4673-PB	2b	gi|62484318,gi|62484495	1	1
VAALNEPSTGDLQGIR	CG33171-PC,CG33171-PE	2b	gi|28574366,gi|45552074	0	7
VACLDFVKPTPTLGTK	CG2151-PA,CG2151-PB,CG2151-PC	2b	gi|24640549,gi|24640551,gi|24640553	1	6
VADILTVK	CG9244-PB,CG9244-PC	2b	gi|17864292,gi|161076999	1	473
VADKFVIVEGK	CG4533-PA,CG4533-PB	2b	gi|17737499,gi|24762361	1	14
VAEGMTLPELGYTQDK	CG1516-PA,CG1516-PB,CG1516-PD,CG1516-PE,CG1516-PG,CG1516-PI,CG1516-PJ,CG1516-PK,CG1516-PL	2b	gi|24652210,gi|24652212,gi|24652214,gi|19921944,gi|24652216,gi|24652218,gi|24652220,gi|24652222,gi|24652224	1	469
VAEYAFQYAK	CG12233-PA,CG12233-PB	2b	gi|24643268,gi|24643270	1	132
VAGGASETGGVKPMVIAGR	CG13240-PA,CG13240-PB	2b	gi|19921400,gi|24584480	0	25
VAIGDQPVDIEQQIK	CG18102-PA,CG18102-PB,CG18102-PC,CG18102-PD,CG18102-PE,CG18102-PF,CG18102-PG,CG18102-PH,CG18102-PI	2b	gi|45555521,gi|24642338,gi|24642340,gi|24642336,gi|45555505,gi|45555485,gi|45555473,gi|116007166,gi|116007168	1	2
VALDYVER	CG12908-PA,CG12908-PB	2b	gi|24652408,gi|45552547	0	41
VASMDVELTVEER	CG31196-PA,CG31196-PB,CG31196-PC,CG31196-PD	2b	gi|24647885,gi|24647887,gi|24647891,gi|24647889	1	30
VAVPSTVHCDHLIEAQIGGPK	CG9244-PB,CG9244-PC	2b	gi|17864292,gi|161076999	1	473
VAYEMGDPYR	CG1640-PA,CG1640-PB,CG1640-PC,CG1640-PD,CG1640-PE,CG1640-PF	2b	gi|24641760,gi|45551451,gi|24641764,gi|24641766,gi|24641768,gi|24641770	1	25
VCEPVVFTADPAPEIVLLK	CG33519-PB,CG33519-PC	2b	gi|161077453,gi|161077455	1	65
VDDLAAELDASQK	CG17927-PA,CG17927-PB,CG17927-PC,CG17927-PD,CG17927-PE,CG17927-PF,CG17927-PG,CG17927-PH,CG17927-PI,CG17927-PJ,CG17927-PK,CG17927-PL,CG17927-PM	2b	gi|24584704,gi|24584710,gi|24584692,gi|24584702,gi|24584696,gi|24584700,gi|24584694,gi|28574239,gi|24584706,gi|24584698,gi|24584712,gi|24584714,gi|24584716	1	2330
VDESSLTGESDHVK	CG2165-PA,CG2165-PB,CG2165-PC,CG2165-PD,CG2165-PE	2b	gi|62484399,gi|62484401,gi|62473120,gi|62473111,gi|62473099	1	35
VDETNTPLVSIFYK	CG7899-PA,CG7899-PB	2b	gi|17864600,gi|24651231	1	2
VDEVVGIMR	CG12210-PA,CG12210-PB	2b	gi|17647971,gi|24652377	1	19
VDGAPLPR	CG33950-PA,CG33950-PB,CG33950-PC,CG33950-PD,CG33950-PE,CG33950-PF,CG33950-PG	2b	gi|78706472,gi|78706470,gi|78706464,gi|78706466,gi|78706468,gi|78706474,gi|161077537	0	871
VDGHADAQSTR	CG33950-PA,CG33950-PB,CG33950-PC,CG33950-PD,CG33950-PE,CG33950-PF,CG33950-PG	2b	gi|78706472,gi|78706470,gi|78706464,gi|78706466,gi|78706468,gi|78706474,gi|161077537	1	871
VDGQPLSPR	CG33950-PA,CG33950-PB,CG33950-PC,CG33950-PD,CG33950-PE,CG33950-PF,CG33950-PG	2b	gi|78706472,gi|78706470,gi|78706464,gi|78706466,gi|78706468,gi|78706474,gi|161077537	1	871
VDLAEELADPDR	CG8479-PA,CG8479-PB	2b	gi|24653584,gi|19922232	0	3
VDLGAFK	CG11522-PA,CG11522-PB	2b	gi|24651668,gi|21357161	0	22
VDMQGQIVEQGTTNFGGNK	CG9325-PA,CG9325-PB,CG9325-PC,CG9325-PD,CG9325-PE,CG9325-PF	2b	gi|17136738,gi|24655667,gi|24655690,gi|24655685,gi|24655672,gi|24655677	1	30
VDNSSLTGESEPQSR	CG5670-PA,CG5670-PB,CG5670-PC,CG5670-PD,CG5670-PE,CG5670-PF,CG5670-PG,CG5670-PH	2b	gi|24648576,gi|24648578,gi|24648580,gi|24648582,gi|45553441,gi|45553439,gi|45553437,gi|45553435	1	209
VDQLSESSDSDVPETSTSSSQSSK	CG7263-PA,CG7263-PB	2b	gi|24581020,gi|28573993	1	7
VDTTEEFPGLFR	CG11198-PA,CG11198-PB,CG11198-PC,CG11198-PD	2b	gi|24586458,gi|24586460,gi|161076407,gi|161076409	0	52
VDVLADATEEQKK	CG14648-PA,CG14648-PB	2b	gi|21355167,gi|161078016	1	22
VDVNGDNAAPLYK	CG12013-PA,CG12013-PB,CG12013-PC,CG12013-PD	2b	gi|24656777,gi|21356883,gi|24656767,gi|24656772	1	55
VEEEINTLR	CG5174-PA,CG5174-PB,CG5174-PG,CG5174-PH,CG5174-PI,CG5174-PJ,CG5174-PK	2b	gi|24655026,gi|24655036,gi|24655020,gi|24655029,gi|24655022,gi|24655017,gi|24655032	1	15
VEELEDYR	CG1915-PA,CG1915-PC	2b	gi|24655827,gi|161080703	0	363
VEGDLKLTQEAVADLER	CG17927-PA,CG17927-PB,CG17927-PC,CG17927-PD,CG17927-PE,CG17927-PF,CG17927-PG,CG17927-PH,CG17927-PI,CG17927-PJ,CG17927-PK,CG17927-PL,CG17927-PM	2b	gi|24584704,gi|24584710,gi|24584692,gi|24584702,gi|24584696,gi|24584700,gi|24584694,gi|28574239,gi|24584706,gi|24584698,gi|24584712,gi|24584714,gi|24584716	0	2330
VEGEQCFEDSPIGR	CG10924-PA,CG10924-PB	2b	gi|24655082,gi|161077226	1	21
VEQISPFPFDLVK	CG11661-PA,CG11661-PB,CG11661-PC,CG11661-PE,CG11661-PF,CG11661-PG,CG11661-PH,CG11661-PI	2b	gi|24665669,gi|24665673,gi|24665677,gi|28574585,gi|28574590,gi|28574592,gi|161084450,gi|161084461	1	218
VEQQNLGQYR	CG33950-PA,CG33950-PB,CG33950-PC,CG33950-PD,CG33950-PE,CG33950-PF,CG33950-PG	2b	gi|78706472,gi|78706470,gi|78706464,gi|78706466,gi|78706468,gi|78706474,gi|161077537	0	871
VESDTFGELK	CG4094-PA,CG4094-PB	2b	gi|24640177,gi|24640179	1	30
VESFLSPLIDQFAK	CG32019-PA,CG32019-PC,CG32019-PD,CG32019-PE	2b	gi|28558739,gi|45552151,gi|45552153,gi|45552149	1	787
VEVISTPEVCEQK	CG9847-PA,CG9847-PB	2b	gi|17352457,gi|24657035	1	12
VEVLETGTPDPK	CG9325-PA,CG9325-PB,CG9325-PC,CG9325-PD,CG9325-PE,CG9325-PF	2b	gi|17136738,gi|24655667,gi|24655690,gi|24655685,gi|24655672,gi|24655677	1	30
VEVQER	CG33950-PA,CG33950-PB,CG33950-PC,CG33950-PD,CG33950-PE,CG33950-PF,CG33950-PG	2b	gi|78706472,gi|78706470,gi|78706464,gi|78706466,gi|78706468,gi|78706474,gi|161077537	0	871
VFSGTSHPDLAQR	CG6767-PA,CG6767-PB	2b	gi|21355239,gi|45551540	1	5
VGADDYEEDDVDEEETK	CG4758-PA,CG4758-PB	2b	gi|17136944,gi|24583206	1	4
VGEAASSASYLR	CG2118-PA,CG2118-PB	2b	gi|24651757,gi|24651759	1	2
VGEATETALIVLAEK	CG3725-PA,CG3725-PB,CG3725-PC,CG3725-PD,CG3725-PE,CG3725-PF,CG3725-PG,CG3725-PH	2b	gi|17136664,gi|24762445,gi|24762447,gi|24762449,gi|24762451,gi|24762453,gi|24762455,gi|24762457	1	581
VGEEFDVPLER	CG1516-PA,CG1516-PB,CG1516-PD,CG1516-PE,CG1516-PG,CG1516-PI,CG1516-PJ,CG1516-PK,CG1516-PL	2b	gi|24652210,gi|24652212,gi|24652214,gi|19921944,gi|24652216,gi|24652218,gi|24652220,gi|24652222,gi|24652224	1	469
VGGAEFEALMR	CG9325-PA,CG9325-PB,CG9325-PC,CG9325-PD,CG9325-PE,CG9325-PF	2b	gi|17136738,gi|24655667,gi|24655690,gi|24655685,gi|24655672,gi|24655677	1	30
VGLIGSCTNSSYEDMGR	CG9244-PB,CG9244-PC	2b	gi|17864292,gi|161076999	1	473
VGPASVAAVK	CG7356-PA,CG7356-PB	2b	gi|24582657,gi|24582659	0	19
VGPLPWLAPATDDAIK	CG2098-PA,CG2098-PB,CG2098-PC	2b	gi|17864156,gi|45552018,gi|24651774	1	14
VGQSVQQTK	CG1648-PA,CG1648-PB	2b	gi|19921938,gi|24652180	1	9
VGTLDQLVGLSDDLGK	CG8048-PA,CG8048-PB,CG8048-PC,CG8048-PD	2b	gi|17137392,gi|19549828,gi|24654128,gi|28573773	1	6
VGWEQLLTSINR	CG4376-PA,CG4376-PB,CG4376-PC	2b	gi|24639238,gi|24639240,gi|17137758	1	241
VIACIGETLEER	CG2171-PA,CG2171-PB,CG2171-PC	2b	gi|28572004,gi|28572006,gi|28572008	1	22
VIAYFATVGASK	CG17927-PA,CG17927-PB,CG17927-PC,CG17927-PD,CG17927-PE,CG17927-PF,CG17927-PG,CG17927-PH,CG17927-PI,CG17927-PJ,CG17927-PK,CG17927-PL,CG17927-PM	2b	gi|24584704,gi|24584710,gi|24584692,gi|24584702,gi|24584696,gi|24584700,gi|24584694,gi|28574239,gi|24584706,gi|24584698,gi|24584712,gi|24584714,gi|24584716	1	2330
VIDVVQPHLER	CG9057-PA,CG9057-PB,CG9057-PC	2b	gi|18859967,gi|116007162,gi|116007164	1	9
VIEPEPIPGPEIIYLR	CG1915-PA,CG1915-PC	2b	gi|24655827,gi|161080703	1	363
VIGSYVGENTELVR	CG1140-PA,CG1140-PB	2b	gi|21358325,gi|24655794	1	10
VIGVNLTGK	CG9244-PB,CG9244-PC	2b	gi|17864292,gi|161076999	1	473
VIQIVGCSPR	CG3979-PA,CG3979-PB,CG3979-PC	2b	gi|17737623,gi|45551633,gi|24666468	1	9
VIQLNTLEDR	CG8479-PA,CG8479-PB	2b	gi|24653584,gi|19922232	0	3
VISHASDLQSSASK	CG1516-PA,CG1516-PB,CG1516-PD,CG1516-PE,CG1516-PG,CG1516-PI,CG1516-PJ,CG1516-PK,CG1516-PL	2b	gi|24652210,gi|24652212,gi|24652214,gi|19921944,gi|24652216,gi|24652218,gi|24652220,gi|24652222,gi|24652224	1	469
VISQQSLER	CG17927-PA,CG17927-PB,CG17927-PC,CG17927-PD,CG17927-PE,CG17927-PF,CG17927-PG,CG17927-PH,CG17927-PI,CG17927-PJ,CG17927-PK,CG17927-PL,CG17927-PM	2b	gi|24584704,gi|24584710,gi|24584692,gi|24584702,gi|24584696,gi|24584700,gi|24584694,gi|28574239,gi|24584706,gi|24584698,gi|24584712,gi|24584714,gi|24584716	1	2330
VITSENANR	CG5320-PA,CG5320-PB,CG5320-PE,CG5320-PF	2b	gi|45549226,gi|24649460,gi|45553473,gi|45553475	1	156
VIVITGDNK	CG3725-PA,CG3725-PB,CG3725-PC,CG3725-PD,CG3725-PE,CG3725-PF,CG3725-PG,CG3725-PH	2b	gi|17136664,gi|24762445,gi|24762447,gi|24762449,gi|24762451,gi|24762453,gi|24762455,gi|24762457	1	581
VIVTNEVGKDESSCK	CG32019-PA,CG32019-PC,CG32019-PD,CG32019-PE	2b	gi|28558739,gi|45552151,gi|45552153,gi|45552149	1	787
VKDTDYDYYAQDDFR	CG7356-PA,CG7356-PB	2b	gi|24582657,gi|24582659	1	19
VKEEVEAEA	CG7178-PA,CG7178-PB,CG7178-PC,CG7178-PD,CG7178-PE,CG7178-PF,CG7178-PG	2b	gi|24642961,gi|24642959,gi|17737363,gi|24642955,gi|24642957,gi|24642953,gi|24642963	1	39
VKYDESENPVIR	CG11779-PA,CG11779-PB,CG11779-PC,CG11779-PD	2b	gi|24648138,gi|24648140,gi|78706782,gi|78706780	1	4
VLAAATPELAQEISK	CG9391-PA,CG9391-PB	2b	gi|21357329,gi|45551810	1	2
VLANDIQAHQNSVDTLNDAGR	CG18076-PA,CG18076-PB,CG18076-PC,CG18076-PE,CG18076-PG,CG18076-PH	2b	gi|24653493,gi|24653489,gi|24653495,gi|24653491,gi|24653487,gi|24653497	1	5
VLANGDLLISEIK	CG15009-PA,CG15009-PB,CG15009-PC	2b	gi|45549192,gi|24657376,gi|45551513	1	10
VLAVNEAGPGHPSKPSDPMTAEHQR	CG32019-PA,CG32019-PC,CG32019-PD,CG32019-PE	2b	gi|28558739,gi|45552151,gi|45552153,gi|45552149	1	787
VLAVNTEGESEPLTGEQSVIAK	CG32019-PA,CG32019-PC,CG32019-PD,CG32019-PE	2b	gi|28558739,gi|45552151,gi|45552153,gi|45552149	1	787
VLDMHNSVSSETFEK	CG10097-PA,CG10097-PB	2b	gi|24646271,gi|78706758	1	80
VLEAVEAADSISDSR	CG11198-PA,CG11198-PB,CG11198-PC,CG11198-PD	2b	gi|24586458,gi|24586460,gi|161076407,gi|161076409	1	52
VLGFCDFMLPSDK	CG5670-PA,CG5670-PB,CG5670-PC,CG5670-PD,CG5670-PE,CG5670-PF,CG5670-PG,CG5670-PH	2b	gi|24648576,gi|24648578,gi|24648580,gi|24648582,gi|45553441,gi|45553439,gi|45553437,gi|45553435	0	209
VLGLQVEQR	CG12908-PA,CG12908-PB	2b	gi|24652408,gi|45552547	0	41
VLGTTAQILQR	CG5625-PA,CG5625-PB	2b	gi|45550489,gi|45551149	1	4
VLLEAGEGLVK	CG7415-PB,CG7415-PC	2b	gi|24645049,gi|24645047	1	4
VLNSYWIAQDASYK	CG17420-PA,CG17420-PB,CG17420-PC,CG17420-PD	2b	gi|62862016,gi|62862018,gi|161076131,gi|161076128	1	9
VLNTVAGGPTPTQLLR	CG33519-PB,CG33519-PC	2b	gi|161077453,gi|161077455	1	65
VLNVETNFISPPVIVK	CG1539-PA,CG1539-PB,CG1539-PC,CG1539-PD,CG1539-PE,CG1539-PF,CG1539-PG	2b	gi|17136980,gi|17136982,gi|24651447,gi|24651441,gi|24651443,gi|24651445,gi|161079282	1	2
VLPEEDCVEEKPETEK	CG33103-PA,CG33103-PB	2b	gi|28572036,gi|28572038	1	438
VLPSICNEVLK	CG15081-PA,CG15081-PB,CG15081-PC,CG15081-PD,CG15081-PE,CG15081-PF	2b	gi|161077238,gi|161077236,gi|161077234,gi|161077240,gi|161077242,gi|161077244	1	25
VLQYYYGTPEIK	CG5630-PA,CG5630-PB	2b	gi|24648574,gi|161078461	1	4
VLSDAIEAEK	CG8189-PA,CG8189-PB	2b	gi|24661884,gi|24661888	1	47
VLSDAIEAEKK	CG8189-PA,CG8189-PB	2b	gi|24661884,gi|24661888	1	47
VLVLADEVYQDNVYDK	CG1640-PA,CG1640-PB,CG1640-PC,CG1640-PD,CG1640-PE,CG1640-PF	2b	gi|24641760,gi|45551451,gi|24641764,gi|24641766,gi|24641768,gi|24641770	1	25
VLVPPTEVVILDAK	CG8779-PA,CG8779-PB	2b	gi|78707507,gi|116007846	0	10
VNAGHVPGTDVGPVISAASR	CG17896-PA,CG17896-PB	2b	gi|24638878,gi|24638876	1	16
VNHEDEDLDGDGVK	CG9297-PA,CG9297-PB	2b	gi|28571703,gi|28571705	0	40
VNIDMVEQAK	CG8048-PA,CG8048-PB,CG8048-PC,CG8048-PD	2b	gi|17137392,gi|19549828,gi|24654128,gi|28573773	0	6
VNINCINQNNGVVDHR	CG10640-PA,CG10640-PB	2b	gi|21355265,gi|24658301	1	5
VNIVEIPGILEVR	CG9297-PA,CG9297-PB	2b	gi|28571703,gi|28571705	1	40
VNNIVFDSCK	CG33979-PA,CG33979-PB	2b	gi|85724872,gi|85724874	1	6
VNPVNANDWENGFFDR	CG11198-PA,CG11198-PB,CG11198-PC,CG11198-PD	2b	gi|24586458,gi|24586460,gi|161076407,gi|161076409	1	52
VNQIGTVTESIAAHLLAK	CG17654-PA,CG17654-PB,CG17654-PC,CG17654-PD,CG17654-PE	2b	gi|17137654,gi|24580914,gi|24580916,gi|24580918,gi|24580920	1	12
VNSLGSEVSDEFER	CG4389-PA,CG4389-PB,CG4389-PC	2b	gi|19921000,gi|24583077,gi|24583079	1	210
VNVSGLLR	CG7639-PA,CG7639-PB	2b	gi|24653772,gi|45552629	0	5
VPEANSAWMDTVIR	CG5261-PA,CG5261-PB	2b	gi|24582497,gi|20129315	1	69
VPEHLNDAYFR	CG11522-PA,CG11522-PB	2b	gi|24651668,gi|21357161	1	22
VPENEIR	CG4260-PA,CG4260-PB	2b	gi|28574818,gi|45552169	1	35
VPFSHDDR	CG32031-PA,CG32031-PB,CG32031-PC,CG32031-PD,CG32031-PE,CG32031-PF	2b	gi|24661336,gi|24661340,gi|24661344,gi|24661348,gi|161082598,gi|161082600	1	143
VPLTSALK	CG3725-PA,CG3725-PB,CG3725-PC,CG3725-PD,CG3725-PE,CG3725-PF,CG3725-PG,CG3725-PH	2b	gi|17136664,gi|24762445,gi|24762447,gi|24762449,gi|24762451,gi|24762453,gi|24762455,gi|24762457	0	581
VPQEQER	CG3861-PA,CG3861-PB	2b	gi|24640126,gi|24640124	1	71
VPSNTAVVEGEK	CG31605-PA,CG31605-PB,CG31605-PC,CG31605-PD,CG31605-PE,CG31605-PF,CG31605-PG,CG31605-PH,CG31605-PI	2b	gi|24582681,gi|24582683,gi|24582685,gi|24582687,gi|24582689,gi|24582691,gi|161076803,gi|24582693,gi|24582695	1	4
VPTQSTSIGNVILESAVTTR	CG33950-PA,CG33950-PB,CG33950-PC,CG33950-PD,CG33950-PE,CG33950-PF,CG33950-PG	2b	gi|78706472,gi|78706470,gi|78706464,gi|78706466,gi|78706468,gi|78706474,gi|161077537	1	871
VPVFIR	CG11567-PA,CG11567-PB	2b	gi|17137192,gi|24582192	0	177
VQGQNEDMLLTACEQFLGK	CG8200-PA,CG8200-PB	2b	gi|17137546,gi|24653894	1	28
VQITYQPHR	CG33103-PA,CG33103-PB	2b	gi|28572036,gi|28572038	1	438
VQQIEEDLEK	CG4843-PA,CG4843-PB,CG4843-PC	2b	gi|28571726,gi|24647095,gi|45551906	1	131
VQQIEEDLEKSEER	CG4843-PA,CG4843-PB,CG4843-PC	2b	gi|28571726,gi|24647095,gi|45551906	1	131
VQYQDNNQER	CG17285-PA,CG17285-PB	2b	gi|24664081,gi|24664085	1	257
VRELENELDGEQR	CG17927-PA,CG17927-PB,CG17927-PC,CG17927-PD,CG17927-PE,CG17927-PF,CG17927-PG,CG17927-PH,CG17927-PI,CG17927-PJ,CG17927-PK,CG17927-PL,CG17927-PM	2b	gi|24584704,gi|24584710,gi|24584692,gi|24584702,gi|24584696,gi|24584700,gi|24584694,gi|28574239,gi|24584706,gi|24584698,gi|24584712,gi|24584714,gi|24584716	1	2330
VSAVNAAGTGEPSDSTPPIIAK	CG32019-PA,CG32019-PC,CG32019-PD,CG32019-PE	2b	gi|28558739,gi|45552151,gi|45552153,gi|45552149	1	787
VSAVNAEGESQPLVGDESIVAR	CG32019-PA,CG32019-PC,CG32019-PD,CG32019-PE	2b	gi|28558739,gi|45552151,gi|45552153,gi|45552149	1	787
VSAVNEEGESEPLTTLVGVVAK	CG32019-PA,CG32019-PC,CG32019-PD,CG32019-PE	2b	gi|28558739,gi|45552151,gi|45552153,gi|45552149	1	787
VSDVMGGLFSK	CG11779-PA,CG11779-PB,CG11779-PC,CG11779-PD	2b	gi|24648138,gi|24648140,gi|78706782,gi|78706780	1	4
VSMAGVTSK	CG4233-PA,CG4233-PB,CG4233-PC	2b	gi|24580970,gi|24580972,gi|19920542	1	88
VSSFCTVPFVR	CG32019-PA,CG32019-PC,CG32019-PD,CG32019-PE	2b	gi|28558739,gi|45552151,gi|45552153,gi|45552149	0	787
VSSTLSGLEGELK	CG32031-PA,CG32031-PB,CG32031-PC,CG32031-PD,CG32031-PE,CG32031-PF	2b	gi|24661336,gi|24661340,gi|24661344,gi|24661348,gi|161082598,gi|161082600	1	143
VSVNDFIIK	CG5261-PA,CG5261-PB	2b	gi|24582497,gi|20129315	1	69
VTETVLAAVYK	CG6058-PA,CG6058-PB,CG6058-PC,CG6058-PD,CG6058-PE,CG6058-PF,CG6058-PG,CG6058-PH	2b	gi|45551983,gi|24650278,gi|24650280,gi|24650282,gi|24650288,gi|24650276,gi|45551985,gi|45553577	1	57
VTGGLHLINPSELTEK	CG1519-PA,CG1519-PB	2b	gi|24652204,gi|28573936	1	4
VTGLNATGYPGVNLK	CG1803-PA,CG1803-PB,CG1803-PC,CG1803-PD	2b	gi|24641469,gi|24641471,gi|18860103,gi|45551448	1	5
VTGTLTGELNK	CG12908-PA,CG12908-PB	2b	gi|24652408,gi|45552547	0	41
VTILDAPSVPEGPLR	CG32019-PA,CG32019-PC,CG32019-PD,CG32019-PE	2b	gi|28558739,gi|45552151,gi|45552153,gi|45552149	1	787
VTLFVPNDAAFMEYR	CG3359-PB,CG3359-PC,CG3359-PD,CG3359-PE,CG3359-PF,CG3359-PG,CG3359-PH,CG3359-PI,CG3359-PJ,CG3359-PK,CG3359-PL,CG3359-PM,CG3359-PN,CG3359-PO,CG3359-PP	2b	gi|24646161,gi|24646163,gi|28573039,gi|28573041,gi|28573043,gi|28573045,gi|28573047,gi|28573049,gi|28573051,gi|28573053,gi|28573061,gi|28573055,gi|28573057,gi|28573059,gi|28573037	1	29
VTLIPGDGIGPEISAAVQK	CG12233-PA,CG12233-PB	2b	gi|24643268,gi|24643270	1	132
VTNASGVAESR	CG1915-PA,CG1915-PC	2b	gi|24655827,gi|161080703	0	363
VTNKPYPQGEVLIGGECVSQGYYK	CG8732-PA,CG8732-PB,CG8732-PC,CG8732-PD,CG8732-PE,CG8732-PF,CG8732-PG,CG8732-PH,CG8732-PI	2b	gi|24586634,gi|22026970,gi|24586636,gi|62471689,gi|62471687,gi|62471685,gi|62471683,gi|62471681,gi|62471679	1	107
VTPLNQAEPATR	CG33484-PA,CG33484-PB,CG33484-PC,CG33484-PD	2b	gi|45580802,gi|116007758,gi|116007760,gi|116007762	0	226
VTQGFSGADLTEICQR	CG2331-PA,CG2331-PB,CG2331-PC,CG2331-PD	2b	gi|17137560,gi|24652279,gi|161076486,gi|161076488	1	19
VTSSTGQVESSAK	CG1915-PA,CG1915-PC	2b	gi|24655827,gi|161080703	1	363
VTTEDPANDFQPNTGR	CG1516-PA,CG1516-PB,CG1516-PD,CG1516-PE,CG1516-PG,CG1516-PI,CG1516-PJ,CG1516-PK,CG1516-PL	2b	gi|24652210,gi|24652212,gi|24652214,gi|19921944,gi|24652216,gi|24652218,gi|24652220,gi|24652222,gi|24652224	1	469
VTTTASAPQLVQPVASSR	CG15825-PA,CG15825-PB	2b	gi|24585183,gi|20129625	1	86
VTVEQNPYR	CG8779-PA,CG8779-PB	2b	gi|78707507,gi|116007846	0	10
VTVIDKPAPPNGPLK	CG32019-PA,CG32019-PC,CG32019-PD,CG32019-PE	2b	gi|28558739,gi|45552151,gi|45552153,gi|45552149	1	787
VTVNTGVDDIR	CG2727-PA,CG2727-PB,CG2727-PC	2b	gi|24762808,gi|45551165,gi|24762812	0	5
VTVNTGVDDIRR	CG2727-PA,CG2727-PB,CG2727-PC	2b	gi|24762808,gi|45551165,gi|24762812	0	5
VVAINSAGEASSSCELK	CG33484-PA,CG33484-PB,CG33484-PC,CG33484-PD	2b	gi|45580802,gi|116007758,gi|116007760,gi|116007762	0	226
VVAVETEAPVVTK	CG18212-PA,CG18212-PB,CG18212-PD,CG18212-PE,CG18212-PF,CG18212-PG	2b	gi|24647739,gi|45553397,gi|24647741,gi|24647743,gi|24647745,gi|21358555	1	4
VVCAAYSHELPK	CG17489-PA,CG17489-PB,CG17489-PC,CG17489-PD,CG17489-PE	2b	gi|116007382,gi|116007384,gi|116007388,gi|116007390,gi|116007386	1	33
VVEEVFGPPK	CG1915-PA,CG1915-PC	2b	gi|24655827,gi|161080703	0	363
VVEIAPAPR	CG1516-PA,CG1516-PB,CG1516-PD,CG1516-PE,CG1516-PG,CG1516-PI,CG1516-PJ,CG1516-PK,CG1516-PL	2b	gi|24652210,gi|24652212,gi|24652214,gi|19921944,gi|24652216,gi|24652218,gi|24652220,gi|24652222,gi|24652224	1	469
VVGMHYFSPVDK	CG4389-PA,CG4389-PB,CG4389-PC	2b	gi|19921000,gi|24583077,gi|24583079	1	210
VVGSEADTGR	CG6416-PA,CG6416-PB,CG6416-PE,CG6416-PF,CG6416-PG,CG6416-PH,CG6416-PI,CG6416-PJ	2b	gi|24661058,gi|45550577,gi|28574406,gi|28574408,gi|28574410,gi|28574412,gi|28574416,gi|45552078	1	33
VVITVGDGPGFYTTR	CG4389-PA,CG4389-PB,CG4389-PC	2b	gi|19921000,gi|24583077,gi|24583079	1	210
VVLPTFILEPR	CG5077-PA,CG5077-PB,CG5077-PC,CG5077-PD	2b	gi|62484308,gi|62484485,gi|62484487,gi|24648385	1	4
VVMEAEAEAESIR	CG8200-PA,CG8200-PB	2b	gi|17137546,gi|24653894	1	28
VVNGVLVIK	CG4389-PA,CG4389-PB,CG4389-PC	2b	gi|19921000,gi|24583077,gi|24583079	1	210
VVPPILTETGK	CG3861-PA,CG3861-PB	2b	gi|24640126,gi|24640124	1	71
VVSEASIQMDTQHPDSISR	CG1915-PA,CG1915-PC	2b	gi|24655827,gi|161080703	1	363
VVSVELSPLR	CG33950-PA,CG33950-PB,CG33950-PC,CG33950-PD,CG33950-PE,CG33950-PF,CG33950-PG	2b	gi|78706472,gi|78706470,gi|78706464,gi|78706466,gi|78706468,gi|78706474,gi|161077537	1	871
VVTVENAER	CG5028-PA,CG5028-PB,CG5028-PC,CG5028-PD,CG5028-PE	2b	gi|24650122,gi|161078633,gi|161078635,gi|161078637,gi|161078639	1	59
VYFAAEDNDCCTR	CG32056-PA,CG32056-PB,CG32056-PC	2b	gi|85726470,gi|24662171,gi|24662167	0	8
VYTFNSVR	CG2165-PA,CG2165-PB,CG2165-PC,CG2165-PD,CG2165-PE	2b	gi|62484399,gi|62484401,gi|62473120,gi|62473111,gi|62473099	1	35
VYWGDISTK	CG12908-PA,CG12908-PB	2b	gi|24652408,gi|45552547	0	41
WAAPNNDGGAPIQK	CG32019-PA,CG32019-PC,CG32019-PD,CG32019-PE	2b	gi|28558739,gi|45552151,gi|45552153,gi|45552149	0	787
WIPAGETDGPVTALK	CG32019-PA,CG32019-PC,CG32019-PD,CG32019-PE	2b	gi|28558739,gi|45552151,gi|45552153,gi|45552149	1	787
WLAQYID	CG7073-PA,CG7073-PB,CG7073-PC,CG7073-PD,CG7073-PE	2b	gi|24648946,gi|21355813,gi|24648948,gi|24648950,gi|45553457	1	4
WSNSPVIVNWYK	CG33950-PA,CG33950-PB,CG33950-PC,CG33950-PD,CG33950-PE,CG33950-PF,CG33950-PG	2b	gi|78706472,gi|78706470,gi|78706464,gi|78706466,gi|78706468,gi|78706474,gi|161077537	0	871
WVAVGDENYGEGSSR	CG9244-PB,CG9244-PC	2b	gi|17864292,gi|161076999	1	473
WVPVGDCTDTEIR	CG32019-PA,CG32019-PC,CG32019-PD,CG32019-PE	2b	gi|28558739,gi|45552151,gi|45552153,gi|45552149	0	787
YACENVNK	CG3320-PA,CG3320-PB	2b	gi|24648682,gi|28572143	1	16
YAPSYASASGSIGSNGYR	CG17549-PA,CG17549-PB,CG17549-PC	2b	gi|28574364,gi|24585186,gi|24585188	0	17
YAPTTDPMDIAK	CG12013-PA,CG12013-PB,CG12013-PC,CG12013-PD	2b	gi|24656777,gi|21356883,gi|24656767,gi|24656772	1	55
YASICQSQR	CG6058-PA,CG6058-PB,CG6058-PC,CG6058-PD,CG6058-PE,CG6058-PF,CG6058-PG,CG6058-PH	2b	gi|45551983,gi|24650278,gi|24650280,gi|24650282,gi|24650288,gi|24650276,gi|45551985,gi|45553577	1	57
YDAGDHVAMFPVNDK	CG11567-PA,CG11567-PB	2b	gi|17137192,gi|24582192	1	177
YDATLTEEQR	CG4217-PA,CG4217-PB	2b	gi|17738065,gi|24648444	0	11
YDDMAQAMK	CG17870-PA,CG17870-PB,CG17870-PC,CG17870-PD,CG17870-PE,CG17870-PF,CG17870-PG,CG17870-PH,CG17870-PI,CG17870-PJ	2b	gi|24652326,gi|24652328,gi|45551063,gi|24652322,gi|24652324,gi|45551065,gi|28573324,gi|45552539,gi|62471697,gi|62471695	1	19
YDGEPEPAATWVK	CG32019-PA,CG32019-PC,CG32019-PD,CG32019-PE	2b	gi|28558739,gi|45552151,gi|45552153,gi|45552149	0	787
YDLPDPEVYR	CG9297-PA,CG9297-PB	2b	gi|28571703,gi|28571705	1	40
YDTPVDIIATPTEIIR	CG14648-PA,CG14648-PB	2b	gi|21355167,gi|161078016	1	22
YECVAVNAAGEAR	CG1915-PA,CG1915-PC	2b	gi|24655827,gi|161080703	0	363
YEDIPVTNMR	CG5261-PA,CG5261-PB	2b	gi|24582497,gi|20129315	1	69
YENICEEAFALAK	CG11661-PA,CG11661-PB,CG11661-PC,CG11661-PE,CG11661-PF,CG11661-PG,CG11661-PH,CG11661-PI	2b	gi|24665669,gi|24665673,gi|24665677,gi|28574585,gi|28574590,gi|28574592,gi|161084450,gi|161084461	1	218
YESDGVAR	CG17927-PA,CG17927-PB,CG17927-PC,CG17927-PD,CG17927-PE,CG17927-PF,CG17927-PG,CG17927-PH,CG17927-PI,CG17927-PJ,CG17927-PK,CG17927-PL,CG17927-PM	2b	gi|24584704,gi|24584710,gi|24584692,gi|24584702,gi|24584696,gi|24584700,gi|24584694,gi|28574239,gi|24584706,gi|24584698,gi|24584712,gi|24584714,gi|24584716	0	2330
YFLDDLDR	CG2204-PA,CG2204-PB,CG2204-PC,CG2204-PD,CG2204-PE,CG2204-PF,CG2204-PG,CG2204-PH,CG2204-PI	2b	gi|24652448,gi|24652446,gi|24652450,gi|28573331,gi|28573333,gi|28573335,gi|28573337,gi|45552559,gi|45552557	1	6
YFSCNTQDCPEEESDFR	CG33103-PA,CG33103-PB	2b	gi|28572036,gi|28572038	0	438
YGCCLDGVSPAK	CG33103-PA,CG33103-PB	2b	gi|28572036,gi|28572038	1	438
YGDLLPADGCLIQSNDLK	CG2165-PA,CG2165-PB,CG2165-PC,CG2165-PD,CG2165-PE	2b	gi|62484399,gi|62484401,gi|62473120,gi|62473111,gi|62473099	1	35
YGEDFTR	CG1915-PA,CG1915-PC	2b	gi|24655827,gi|161080703	0	363
YGLNICR	CG8495-PA,CG8495-PC	2b	gi|24645515,gi|24645517	1	5
YGLYLR	CG6803-PA,CG6803-PB,CG6803-PC,CG6803-PD,CG6803-PE	2b	gi|24646989,gi|21357797,gi|24646991,gi|24646986,gi|24646984	0	71
YGNAFLNR	CG6148-PA,CG6148-PB	2b	gi|24646379,gi|24646381	1	16
YGNNGCNGGLMDNAFR	CG6692-PA,CG6692-PB,CG6692-PC	2b	gi|24653516,gi|24653518,gi|24653514	1	104
YGPNELPTEEGK	CG3725-PA,CG3725-PB,CG3725-PC,CG3725-PD,CG3725-PE,CG3725-PF,CG3725-PG,CG3725-PH	2b	gi|17136664,gi|24762445,gi|24762447,gi|24762449,gi|24762451,gi|24762453,gi|24762455,gi|24762457	1	581
YGQSDPANTSEPILAR	CG32019-PA,CG32019-PC,CG32019-PD,CG32019-PE	2b	gi|28558739,gi|45552151,gi|45552153,gi|45552149	1	787
YGSILDR	CG3082-PA,CG3082-PB,CG3082-PC,CG3082-PD	2b	gi|24659015,gi|24659021,gi|19922796,gi|24659033	1	6
YGYSSLQQQAENQGR	CG33484-PA,CG33484-PB,CG33484-PC,CG33484-PD	2b	gi|45580802,gi|116007758,gi|116007760,gi|116007762	0	226
YICNSYDVDR	CG33950-PA,CG33950-PB,CG33950-PC,CG33950-PD,CG33950-PE,CG33950-PF,CG33950-PG	2b	gi|78706472,gi|78706470,gi|78706464,gi|78706466,gi|78706468,gi|78706474,gi|161077537	1	871
YIDIAIPCNNK	CG14792-PA,CG14792-PB,CG14792-PD	2b	gi|17136518,gi|24639112,gi|45551198	1	30
YIEQPIKPAPLPIVTSR	CG32019-PA,CG32019-PC,CG32019-PD,CG32019-PE	2b	gi|28558739,gi|45552151,gi|45552153,gi|45552149	1	787
YLAEFATGSDR	CG31196-PA,CG31196-PB,CG31196-PC,CG31196-PD	2b	gi|24647885,gi|24647887,gi|24647891,gi|24647889	1	30
YLAEVATGDAR	CG17870-PA,CG17870-PB,CG17870-PC,CG17870-PD,CG17870-PE,CG17870-PF,CG17870-PG,CG17870-PH,CG17870-PI,CG17870-PJ	2b	gi|24652326,gi|24652328,gi|45551063,gi|24652322,gi|24652324,gi|45551065,gi|28573324,gi|45552539,gi|62471697,gi|62471695	1	19
YLCAGNTDFYNNLDK	CG6904-PA,CG6904-PB,CG6904-PC	2b	gi|45551893,gi|21357845,gi|24646982	1	27
YLDTVCLNMVQNPGK	CG12233-PA,CG12233-PB	2b	gi|24643268,gi|24643270	1	132
YLQELQDMNSR	CG18408-PA,CG18408-PB,CG18408-PC,CG18408-PD,CG18408-PE,CG18408-PF,CG18408-PG,CG18408-PH,CG18408-PI,CG18408-PJ	2b	gi|24652386,gi|45551068,gi|24652388,gi|24652397,gi|24652399,gi|24652390,gi|24652392,gi|20301946,gi|24652384,gi|45552545	1	3
YMQELYR	CG17420-PA,CG17420-PB,CG17420-PC,CG17420-PD	2b	gi|62862016,gi|62862018,gi|161076131,gi|161076128	1	9
YNLGLDLR	CG5320-PA,CG5320-PB,CG5320-PE,CG5320-PF	2b	gi|45549226,gi|24649460,gi|45553473,gi|45553475	1	156
YNLQVR	CG32031-PA,CG32031-PB,CG32031-PC,CG32031-PD,CG32031-PE,CG32031-PF	2b	gi|24661336,gi|24661340,gi|24661344,gi|24661348,gi|161082598,gi|161082600	0	143
YPENLLSLR	CG2803-PA,CG2803-PB	2b	gi|24762794,gi|85725076	1	4
YQQQLK	CG17927-PA,CG17927-PB,CG17927-PC,CG17927-PD,CG17927-PE,CG17927-PF,CG17927-PG,CG17927-PH,CG17927-PI,CG17927-PJ,CG17927-PK,CG17927-PL,CG17927-PM	2b	gi|24584704,gi|24584710,gi|24584692,gi|24584702,gi|24584696,gi|24584700,gi|24584694,gi|28574239,gi|24584706,gi|24584698,gi|24584712,gi|24584714,gi|24584716	0	2330
YQSWIQDACR	CG11567-PA,CG11567-PB	2b	gi|17137192,gi|24582192	0	177
YQVSIHETEDTNDPR	CG5670-PA,CG5670-PB,CG5670-PC,CG5670-PD,CG5670-PE,CG5670-PF,CG5670-PG,CG5670-PH	2b	gi|24648576,gi|24648578,gi|24648580,gi|24648582,gi|45553441,gi|45553439,gi|45553437,gi|45553435	1	209
YSFISEIAR	CG33519-PB,CG33519-PC	2b	gi|161077453,gi|161077455	1	65
YSGIVHK	CG12740-PA,CG12740-PB,CG12740-PC,CG12740-PD	2b	gi|24656625,gi|24656628,gi|24656637,gi|24656632	1	8
YSPSGFYIASGDASGK	CG10724-PA,CG10724-PB	2b	gi|21356527,gi|24663783	1	8
YSQTIGGSR	CG17420-PA,CG17420-PB,CG17420-PC,CG17420-PD	2b	gi|62862016,gi|62862018,gi|161076131,gi|161076128	1	9
YTDTTPIAGR	CG14792-PA,CG14792-PB,CG14792-PD	2b	gi|17136518,gi|24639112,gi|45551198	1	30
YTVTAANEFGK	CG32019-PA,CG32019-PC,CG32019-PD,CG32019-PE	2b	gi|28558739,gi|45552151,gi|45552153,gi|45552149	1	787
YVADKEDVYE	CG9160-PA,CG9160-PB	2b	gi|17136934,gi|17136932	1	4
YVDMSIATK	CG4307-PA,CG4307-PB	2b	gi|24647054,gi|24647056	1	64
YVGDDYYFIINR	CG32019-PA,CG32019-PC,CG32019-PD,CG32019-PE	2b	gi|28558739,gi|45552151,gi|45552153,gi|45552149	1	787
YVNPEDSGTYTCR	CG1915-PA,CG1915-PC	2b	gi|24655827,gi|161080703	1	363
YYFDTSYGGCAR	CG33103-PA,CG33103-PB	2b	gi|28572036,gi|28572038	1	438
YYIGDLAAADIK	CG3566-PB,CG3566-PC	2b	gi|45549316,gi|45554235	1	10
YYTNLADELVK	CG1516-PA,CG1516-PB,CG1516-PD,CG1516-PE,CG1516-PG,CG1516-PI,CG1516-PJ,CG1516-PK,CG1516-PL	2b	gi|24652210,gi|24652212,gi|24652214,gi|19921944,gi|24652216,gi|24652218,gi|24652220,gi|24652222,gi|24652224	1	469

## Sheet: PeptideClassifier Analysis All 
Peptide sequence	Implied protein(s) (CG identifier)	Peptide evidence class	Implied protein(s) (GI identifier)	Overlap with Brunner et al. (1= seen in both studies / 0= seen only in Foster et al.)
AAAKPAAAAPAK	CG5261-PA,CG5261-PB	2b	gi|24582497,gi|20129315	1
AAALFANEEEFKK	CG14648-PA,CG14648-PB	2b	gi|21355167,gi|161078016	1
AAALLGSAAPANADEISK	CG33715-PB,CG33715-PD	2a	gi|161076702,gi|161076705	1
AAAPAAAPAAAAKPAAPAAAPAANGK	CG7178-PG	1a	gi|24642963	1
AAAPAAAPAPAAPK	CG5214-PA	1a	gi|24645909	1
AAAPAAVASPAAAATSADASPSPAK	CG6143-PA,CG6143-PB,CG6143-PC	2b	gi|45551590,gi|17864514,gi|45553181	1
AAAQQTFGGNTPAQTNDR	CG6151-PA	1a	gi|21358259	1
AADIVVDEIR	CG3415-PA	1a	gi|18859837	1
AADIVVDEIRK	CG3415-PA	1a	gi|18859837	1
AADLMATTYR	CG7145-PA,CG7145-PB,CG7145-PD	1b	gi|24668413,gi|24668417,gi|24668425	1
AADLQQLQNGR	CG4598-PA	1a	gi|24583165	1
AADYLTEYNSGIK	CG1065-PA	1a	gi|28574296	1
AAEAAAALGFK	CG6000-PA	1a	gi|45550806	1
AAEGNDGPIVLGQSSEQQLDGAK	CG7654-PA	1a	gi|28574622	1
AAEIVKDDDPPIK	CG8983-PA	1a	gi|45551086	1
AAEPAEELDAADEALAAEPK	CG11901-PA,CG11901-PB	1b	gi|24651001,gi|24651003	1
AAEQTESPPQAEPTVTAEK	CG10360-PA,CG10360-PB	1b	gi|17136432,gi|62471647	1
AAETAEAQASALTNAAGAAASAAK	CG6533-PA	1a	gi|17647279	0
AAEYNVR	CG5809-PA	1a	gi|19921434	0
AAFDSVGK	CG2184-PA	1a	gi|17933672	0
AAFGLVAEGFR	CG17246-PA,CG17246-PB,CG17246-PC	1b	gi|17137288,gi|24655642,gi|24655647	1
AAFGNGAMFIEK	CG1516-PA,CG1516-PB,CG1516-PD,CG1516-PE,CG1516-PG,CG1516-PI,CG1516-PJ,CG1516-PK,CG1516-PL	2b	gi|24652210,gi|24652212,gi|24652214,gi|19921944,gi|24652216,gi|24652218,gi|24652220,gi|24652222,gi|24652224	1
AAGITYIQYSNIAAR	CG9032-PA,CG9032-PB	2b	gi|17864256,gi|24642319	1
AAGNDNPFDMK	CG11015-PA	1a	gi|20129279	1
AAILESEGVR	CG2970-PA	1a	gi|45550506	1
AAIQVFNCPGDSGAR	CG3501-PA	1a	gi|19922774	1
AALDAAGLK	CG4600-PA	1a	gi|17648125	1
AALLNSK	CG7920-PA	1a	gi|21358615	1
AANNGAYPPDLSYIVSAR	CG4769-PA	1a	gi|24658292	1
AANPQITTVEVVR	CG4217-PA,CG4217-PB	2b	gi|17738065,gi|24648444	1
AANQPESTIVVVGTVTDDAR	CG8615-PA	1a	gi|21357009	1
AAPAAAAAPAGPPKDPNDPK	CG7178-PG	1a	gi|24642963	1
AAPAEDEEEAAPK	CG5012-PA	1a	gi|17864338	1
AAPFNNWLDGTR	CG4376-PA,CG4376-PB,CG4376-PC	2b	gi|24639238,gi|24639240,gi|17137758	0
AAPGGCCDVVLDR	CG30296-PC,CG30296-PE,CG30296-PG	2a	gi|161077298,gi|161077300,gi|161077304	0
AAPLVAAGPAIVK	CG2342-PA	1a	gi|21358149	1
AAPRPPPPAPVAALKPAVAQVK	CG5214-PA	1a	gi|24645909	1
AAPVAPIAPVALAAPAPIVR	CG1330-PA	1a	gi|21358141	1
AAQETVQELGSER	CG3603-PA	1a	gi|24639444	1
AAQGSALATEEVR	CG10119-PA	1a	gi|24653664	1
AAQIIEFIK	CG17524-PA	1a	gi|24654975	1
AARPYGIGAQQFFEK	CG7610-PA,CG7610-PB,CG7610-PC	1b	gi|24651125,gi|24651127,gi|24651129	1
AASANWYGGDAR	CG4169-PA	1a	gi|24665395	1
AASTMFFGELLR	CG3944-PA	1a	gi|17864306	1
AASTPAAAPPAK	CG7434-PA	1a	gi|17137152	1
AASTQAGTPAPPSK	CG7445-PA	1a	gi|17737667	1
AATAYSGIVEAVEAAQK	CG10236-PA	1a	gi|17136292	1
AATWALDR	CG7470-PA	1a	gi|21357643	1
AAVAAPVVR	CG2342-PA	1a	gi|21358149	1
AAVDAGFVPNDLQIGQTGK	CG8996-PA,CG8996-PB	1b	gi|24652801,gi|17136898	1
AAVEEGIVPGGGTALLR	CG12101-PA,CG12101-PB,CG7235-PA,CG7235-PB,CG7235-PC	3b	gi|24641191,gi|24641193,gi|45550935,gi|45550936,gi|45550132	1
AAVEEVPAEYYTSQLGK	CG17691-PA,CG17691-PC	2a	gi|160714828,gi|160714832	1
AAVEGMPDIK	CG11258-PA	1a	gi|17647671	0
AAVENPAIIVAGL	CG5214-PA	1a	gi|24645909	1
AAVPLLAGVESK	CG2139-PA,CG2139-PB,CG2139-PC,CG2139-PD	2b	gi|24651389,gi|45552009,gi|24651387,gi|24651391	1
AAVPSGASTGVHEALELR	CG17654-PA,CG17654-PB,CG17654-PC,CG17654-PD,CG17654-PE	2b	gi|17137654,gi|24580914,gi|24580916,gi|24580918,gi|24580920	1
AAVSGAVEQATLR	CG5840-PA,CG5840-PB	2b	gi|21358587,gi|24647700	1
AAVVGMTLPIAR	CG7113-PA	1a	gi|17737361	1
AAVVNFTSSLAK	CG3481-PC,CG3481-PE,CG3481-PF,CG3481-PH,CG3481-PI	1b	gi|78706922,gi|78706930,gi|78706928,gi|78706926,gi|78706924	1
AAYADFYSK	CG14028-PA	1a	gi|24581914	1
AAYFGFYDTAR	CG16944-PA,CG16944-PB,CG16944-PC,CG16944-PD	2b	gi|18079273,gi|24641095,gi|24641090,gi|24641092	1
ACDDLWVSR	CG2718-PB,CG2718-PC	1b	gi|17136208,gi|24580558	1
ACDWDFDVESFK	CG32019-PA,CG32019-PC,CG32019-PD,CG32019-PE	2b	gi|28558739,gi|45552151,gi|45552153,gi|45552149	0
ACGEECVIAIK	CG3186-PA,CG3186-PB	1b	gi|19922878,gi|24762531	1
ACNQLGQFLSNR	CG4260-PA,CG4260-PB	2b	gi|28574818,gi|45552169	1
ADAGIYTCHGK	CG33950-PA,CG33950-PB,CG33950-PC,CG33950-PD,CG33950-PE,CG33950-PF,CG33950-PG	2b	gi|78706472,gi|78706470,gi|78706464,gi|78706466,gi|78706468,gi|78706474,gi|161077537	0
ADAQNGGEAVTVAGGDVGGAR	CG14648-PA,CG14648-PB	2b	gi|21355167,gi|161078016	1
ADAVYSGPALTDESDR	CG5700-PB	1a	gi|24663043	0
ADAVYSGPALTDESDRVPEAQLK	CG5700-PB	1a	gi|24663043	1
ADDGTPFAEILK	CG6058-PA,CG6058-PB,CG6058-PC,CG6058-PD,CG6058-PE,CG6058-PF,CG6058-PG,CG6058-PH	2b	gi|45551983,gi|24650278,gi|24650280,gi|24650282,gi|24650288,gi|24650276,gi|45551985,gi|45553577	1
ADDLEDIYK	CG17489-PA,CG17489-PB,CG17489-PC	2a	gi|116007382,gi|116007384,gi|116007388	1
ADDLEDIYKK	CG17489-PA,CG17489-PB,CG17489-PC	2a	gi|116007382,gi|116007384,gi|116007388	1
ADDPSAYVDVVDVASK	CG9012-PA,CG9012-PB,CG9012-PC,CG9012-PD,CG9012-PE,CG9012-PF	1b	gi|17137000,gi|24642310,gi|45555333,gi|45555323,gi|161077848,gi|161077850	1
ADDSAIYTCK	CG1915-PA,CG1915-PC	2b	gi|24655827,gi|161080703	0
ADELFNEVTQDASGK	CG10844-PA,CG10844-PB,CG10844-PC,CG10844-PD	2b	gi|17352465,gi|17352467,gi|17352469,gi|17352471	1
ADELLGTASEQFLGK	CG32593-PA,CG32593-PB,CG32593-PC,CG32593-PE,CG32593-PF	2a	gi|24642027,gi|24642031,gi|24642061,gi|24642029,gi|24642033	0
ADESYIVGK	CG1516-PA,CG1516-PB,CG1516-PD,CG1516-PE,CG1516-PG,CG1516-PI,CG1516-PJ,CG1516-PK,CG1516-PL	2b	gi|24652210,gi|24652212,gi|24652214,gi|19921944,gi|24652216,gi|24652218,gi|24652220,gi|24652222,gi|24652224	1
ADETATEEAPQFVSALR	CG33519-PB,CG33519-PC	2b	gi|161077453,gi|161077455	1
ADGAAIHATVAEYCK	CG2286-PA,CG2286-PB	1b	gi|24640557,gi|24640559	1
ADGALLLMEAK	CG8189-PA,CG8189-PB	2b	gi|24661884,gi|24661888	1
ADGVNILNLGK	CG14792-PA,CG14792-PB,CG14792-PD	2b	gi|17136518,gi|24639112,gi|45551198	1
ADIDILSAGDLTEIGEK	CG6214-PA,CG6214-PB,CG6214-PC,CG6214-PD,CG6214-PE,CG6214-PF,CG6214-PG,CG6214-PH,CG6214-PI,CG6214-PJ,CG6214-PK,CG6214-PL,CG6214-PM,CG6214-PN,CG6214-PO,CG6214-PP,CG6214-PQ	2b	gi|45550972,gi|24583969,gi|45552353,gi|45552351,gi|45552349,gi|45552347,gi|45552345,gi|45552343,gi|45552341,gi|45552339,gi|45552337,gi|45552335,gi|45552363,gi|45552361,gi|45552359,gi|45552357,gi|45552355	1
ADIGEVFAK	CG12013-PA,CG12013-PB,CG12013-PC,CG12013-PD	2b	gi|24656777,gi|21356883,gi|24656767,gi|24656772	1
ADIGVAMGIAGSDVSK	CG5670-PA,CG5670-PB,CG5670-PC,CG5670-PD,CG5670-PE,CG5670-PF,CG5670-PG,CG5670-PH	2b	gi|24648576,gi|24648578,gi|24648580,gi|24648582,gi|45553441,gi|45553439,gi|45553437,gi|45553435	1
ADKDTSNGLLFFYGR	CG10236-PA	1a	gi|17136292	0
ADKLNEEVR	CG4843-PA,CG4843-PB,CG4843-PC	2b	gi|28571726,gi|24647095,gi|45551906	1
ADKLNEEVRDLEK	CG4843-PA,CG4843-PB,CG4843-PC	2b	gi|28571726,gi|24647095,gi|45551906	1
ADLAEQAISK	CG17927-PA,CG17927-PB,CG17927-PC,CG17927-PD,CG17927-PE,CG17927-PF,CG17927-PG,CG17927-PH,CG17927-PI,CG17927-PJ,CG17927-PK,CG17927-PL,CG17927-PM	2b	gi|24584704,gi|24584710,gi|24584692,gi|24584702,gi|24584696,gi|24584700,gi|24584694,gi|28574239,gi|24584706,gi|24584698,gi|24584712,gi|24584714,gi|24584716	1
ADLEETGR	CG3612-PA	1a	gi|24658560	1
ADLSNIR	CG3664-PA,CG3664-PB,CG3664-PC,CG3664-PD,CG3664-PE,CG3664-PF	1b	gi|24581101,gi|24581103,gi|24581105,gi|24581107,gi|17736973,gi|24581110	0
ADLSVFDALGK	CG6341-PA	1a	gi|45549259	1
ADLSVQVIQMSER	CG5939-PA,CG5939-PB	1b	gi|24661112,gi|24661116	0
ADLTDYIQTHYK	CG3731-PA,CG3731-PB	1b	gi|24646943,gi|21357875	1
ADMSTIAAHNVLR	CG9331-PA,CG9331-PB,CG9331-PC,CG9331-PD,CG9331-PE	2b	gi|45551003,gi|24585514,gi|28574284,gi|28574282,gi|45552429	1
ADNLIENHDYSFR	CG32019-PA,CG32019-PC,CG32019-PD,CG32019-PE	2b	gi|28558739,gi|45552151,gi|45552153,gi|45552149	1
ADNYDSLTSR	CG4123-PA,CG4123-PB	1b	gi|24665368,gi|24665372	0
ADQEISGLK	CG17927-PA,CG17927-PB,CG17927-PC,CG17927-PD,CG17927-PE,CG17927-PF,CG17927-PG,CG17927-PH,CG17927-PI,CG17927-PJ,CG17927-PK,CG17927-PL,CG17927-PM	2b	gi|24584704,gi|24584710,gi|24584692,gi|24584702,gi|24584696,gi|24584700,gi|24584694,gi|28574239,gi|24584706,gi|24584698,gi|24584712,gi|24584714,gi|24584716	1
ADQEISGLKK	CG17927-PA,CG17927-PB,CG17927-PC,CG17927-PD,CG17927-PE,CG17927-PF,CG17927-PG,CG17927-PH,CG17927-PI,CG17927-PJ,CG17927-PK,CG17927-PL,CG17927-PM	2b	gi|24584704,gi|24584710,gi|24584692,gi|24584702,gi|24584696,gi|24584700,gi|24584694,gi|28574239,gi|24584706,gi|24584698,gi|24584712,gi|24584714,gi|24584716	1
ADQLEQGASQFEQQAGK	CG12210-PA,CG12210-PB	2b	gi|17647971,gi|24652377	1
ADQSAVTASSGSGTSSPPAGQPPLK	CG13865-PA	1a	gi|116007256	1
ADQSIQLINR	CG9432-PB,CG9432-PD,CG9432-PE	2a	gi|24586058,gi|116007558,gi|116007556	0
ADRDEASPYAAMLAAQDVAEK	CG1524-PA,CG1524-PB,CG1527-PA	3a	gi|24640451,gi|17975579,gi|17977696	1
ADSDVNIDLK	CG6647-PA,CG6647-PB,CG6647-PC	1b	gi|17136632,gi|19550069,gi|85724932	1
ADSVVAGTPANEEAAPEEVEEIK	CG7445-PA	1a	gi|17737667	1
ADTAESSLNIIR	CG5939-PA,CG5939-PB,CG5939-PC,CG5939-PD	2b	gi|24661112,gi|24661116,gi|24661120,gi|24661124	1
ADVISHCAIDPENR	CG9379-PA	1a	gi|21355865	0
ADVPFGQVK	CG4692-PA,CG4692-PB	1b	gi|24762682,gi|19922916	1
ADVSIVVPR	CG4665-PA,CG4665-PB,CG4665-PC	1b	gi|17647337,gi|62472128,gi|62472140	1
ADYELVPQDQEAK	CG13037-PA	1a	gi|24665233	1
AEASVEHILAR	CG3999-PA	1a	gi|24645648	1
AEAVTSYLK	CG8256-PA,CG8256-PB,CG8256-PC,CG8256-PD	1b	gi|24653942,gi|24653944,gi|20130025,gi|161077125	0
AECTAEDAYK	CG5889-PA	1a	gi|21356279	1
AECTAEEAYTYTK	CG10120-PA,CG10120-PB	2b	gi|24646388,gi|24646386	1
AEDAGVYLVVAR	CG1915-PA,CG1915-PC	2b	gi|24655827,gi|161080703	0
AEDLVLGDVVEVK	CG5670-PA,CG5670-PB,CG5670-PC,CG5670-PD,CG5670-PE,CG5670-PF,CG5670-PG,CG5670-PH	2b	gi|24648576,gi|24648578,gi|24648580,gi|24648582,gi|45553441,gi|45553439,gi|45553437,gi|45553435	1
AEDMSNLTYLNDASVLHNLR	CG17927-PA,CG17927-PB,CG17927-PD,CG17927-PF,CG17927-PH,CG17927-PI,CG17927-PK,CG17927-PL,CG17927-PM	2a	gi|24584704,gi|24584710,gi|24584702,gi|24584700,gi|28574239,gi|24584706,gi|24584712,gi|24584714,gi|24584716	1
AEECVQCFCFGVAK	CG33950-PA,CG33950-PB,CG33950-PC,CG33950-PD,CG33950-PE,CG33950-PF,CG33950-PG	2b	gi|78706472,gi|78706470,gi|78706464,gi|78706466,gi|78706468,gi|78706474,gi|161077537	0
AEEEDAEEECDILGNK	CG5482-PA	1a	gi|19922556	1
AEEEFNIEK	CG1088-PA,CG1088-PB	1b	gi|24644298,gi|17737775	1
AEEEQKMAQRKK	CG7107-PA,CG7107-PB,CG7107-PE,CG7107-PF,CG7107-PG	2a	gi|24641813,gi|24641811,gi|62473677,gi|62473664,gi|62473654	0
AEEIEGGASVPATSDNSSQDEHISSR	CG10610-PA	1a	gi|24644458	1
AEELATAQFNATK	CG31349-PA,CG31349-PB,CG31349-PC,CG31349-PE,CG31349-PF,CG31349-PG,CG31349-PH	2b	gi|28573157,gi|28573161,gi|28573159,gi|28573155,gi|28573163,gi|161078102,gi|161078104	0
AEELHAAEVK	CG17927-PA,CG17927-PB,CG17927-PC,CG17927-PD,CG17927-PE,CG17927-PF,CG17927-PG,CG17927-PH,CG17927-PI,CG17927-PJ,CG17927-PK,CG17927-PL,CG17927-PM	2b	gi|24584704,gi|24584710,gi|24584692,gi|24584702,gi|24584696,gi|24584700,gi|24584694,gi|28574239,gi|24584706,gi|24584698,gi|24584712,gi|24584714,gi|24584716	1
AEELSFPK	CG1516-PA,CG1516-PB,CG1516-PD,CG1516-PE,CG1516-PG,CG1516-PI,CG1516-PJ,CG1516-PK,CG1516-PL	2b	gi|24652210,gi|24652212,gi|24652214,gi|19921944,gi|24652216,gi|24652218,gi|24652220,gi|24652222,gi|24652224	1
AEEPLALNEWHTVR	CG33950-PA,CG33950-PC,CG33950-PD,CG33950-PE,CG33950-PF,CG33950-PG	2a	gi|78706472,gi|78706464,gi|78706466,gi|78706468,gi|78706474,gi|161077537	0
AEEVEEIR	CG5939-PA,CG5939-PB	1b	gi|24661112,gi|24661116	0
AEEVEEIRR	CG5939-PA,CG5939-PB	1b	gi|24661112,gi|24661116	0
AEFAER	CG1747-PA,CG1747-PB,CG4898-PA,CG4898-PB,CG4898-PD,CG4898-PE,CG4898-PF,CG4898-PG,CG4898-PJ,CG4898-PK,CG4898-PL	3b	gi|24641298,gi|24641300,gi|24647089,gi|45551896,gi|24647073,gi|45551900,gi|45551898,gi|24647075,gi|24647077,gi|45553377,gi|45553375	0
AEFTITIK	CG31233-PA	1a	gi|28571792	0
AEIGIAMGSGTAVAK	CG3725-PA,CG3725-PB,CG3725-PC,CG3725-PD,CG3725-PE,CG3725-PF,CG3725-PG,CG3725-PH	2b	gi|17136664,gi|24762445,gi|24762447,gi|24762449,gi|24762451,gi|24762453,gi|24762455,gi|24762457	1
AEIQQLCDEVER	CG3299-PA	1a	gi|17136646	1
AEISNTTNGQVFR	CG3989-PA	1a	gi|18860083	1
AEITQIQDSQAMIR	CG6750-PA	1a	gi|24583513	1
AEITWLNNENK	CG15009-PA,CG15009-PB,CG15009-PC	2b	gi|45549192,gi|24657376,gi|45551513	1
AELNEFLTR	CG6779-PA	1a	gi|17136324	1
AENQYGLSDPLDIIEPIVAK	CG32019-PA,CG32019-PC,CG32019-PD,CG32019-PE	2b	gi|28558739,gi|45552151,gi|45552153,gi|45552149	1
AEQQQLEDIELLER	CG3322-PA	1a	gi|17737557	1
AESLLTR	CG5676-PA	1a	gi|24583291	0
AESQLAYELQAAK	CG32593-PA,CG32593-PB,CG32593-PC,CG32593-PD,CG32593-PE,CG32593-PF	2b	gi|24642027,gi|24642031,gi|24642061,gi|24642065,gi|24642029,gi|24642033	1
AETSSQVNLSEVPQK	CG33715-PB,CG33715-PD	2a	gi|161076702,gi|161076705	0
AETSTEENNAAATEGEGEDNASGSAPDPK	CG10757-PA,CG10757-PB	1b	gi|17647685,gi|24585392	1
AFAAGADIK	CG6543-PA,CG6543-PB	1b	gi|20129971,gi|24653477	1
AFAGAISK	CG7580-PA	1a	gi|21355243	0
AFEDYVGLLGEK	CG3887-PA	1a	gi|19920720	1
AFGDYPAEYNPK	CG4692-PA,CG4692-PB	1b	gi|24762682,gi|19922916	0
AFLIEEQK	CG6090-PA,CG6090-PB,CG9354-PA,CG9354-PB	3b	gi|24650253,gi|24650255,gi|24645339,gi|24645341	1
AFNDVGHSSEAR	CG3566-PB,CG3566-PC	2b	gi|45549316,gi|45554235	1
AFNGPVLIASK	CG11963-PA,CG11963-PB	1b	gi|24645208,gi|161078106	1
AFPLADAQLTAK	CG3949-PA	1a	gi|17864298	1
AFQAEELGNDLDIK	CG12918-PA	1a	gi|20129845	1
AFSPTTVTTGR	CG9539-PA	1a	gi|19920826	1
AFTGFIVER	CG12262-PA	1a	gi|24660351	1
AFVWPVGQQVQR	CG8200-PA,CG8200-PB	2b	gi|17137546,gi|24653894	1
AGAFTVLCSDEEEAAR	CG4233-PA,CG4233-PB,CG4233-PC	2b	gi|24580970,gi|24580972,gi|19920542	1
AGAGSATLSMAYAGAR	CG7998-PA	1a	gi|24647881	1
AGDPVILEEAK	CG6084-PA,CG6084-PB	2b	gi|24662781,gi|24662785	1
AGDVIQCGMADLAK	CG5793-PA	1a	gi|28571789	1
AGEAFTSTTIFCSSK	CG1915-PA,CG1915-PC	2b	gi|24655827,gi|161080703	1
AGECTEEEVDK	CG8900-PA,CG8900-PB	1b	gi|17136882,gi|24656100	1
AGEFIDAGDNTYGGK	CG17320-PA,CG17597-PA	3b	gi|24585051,gi|19921506	1
AGEPETPEGEEDAK	CG7107-PA,CG7107-PB,CG7107-PD,CG7107-PE,CG7107-PF,CG7107-PG	2b	gi|24641813,gi|24641811,gi|24641815,gi|62473677,gi|62473664,gi|62473654	1
AGEPVNLNIPISGAPTPTIEWK	CG32019-PA,CG32019-PC,CG32019-PD,CG32019-PE	2b	gi|28558739,gi|45552151,gi|45552153,gi|45552149	0
AGESSLEECK	CG4651-PA,CG4651-PB	1b	gi|17647879,gi|85724916	1
AGFAGDDAPR	CG10067-PA,CG12051-PA,CG18290-PA,CG18290-PB,CG4027-PA,CG4027-PB,CG4027-PC,CG4027-PD,CG5178-PA,CG7478-PA	3b	gi|17647135,gi|17647133,gi|17137090,gi|24646579,gi|24639997,gi|17530805,gi|62473526,gi|62473515,gi|17975545,gi|17975540	1
AGFSDPSDATEPHLAKPR	CG32019-PA,CG32019-PC,CG32019-PD,CG32019-PE	2b	gi|28558739,gi|45552151,gi|45552153,gi|45552149	0
AGGEAVADYNSVIDGAK	CG3415-PA	1a	gi|18859837	1
AGGEVLTFDQLALR	CG8615-PA	1a	gi|21357009	1
AGGPHYILR	CG7145-PA,CG7145-PB,CG7145-PD	1b	gi|24668413,gi|24668417,gi|24668425	1
AGGSLGLMQPGGDTEELLEK	CG7523-PA	1a	gi|24647735	1
AGGVVEAAISYTGDVSDPK	CG1516-PA,CG1516-PB,CG1516-PD,CG1516-PE,CG1516-PG,CG1516-PI,CG1516-PJ,CG1516-PK,CG1516-PL	2b	gi|24652210,gi|24652212,gi|24652214,gi|19921944,gi|24652216,gi|24652218,gi|24652220,gi|24652222,gi|24652224	1
AGIASEAQK	CG9244-PB,CG9244-PC	2b	gi|17864292,gi|161076999	1
AGISLNDK	CG12055-PA,CG12055-PB,CG8893-PA,CG8893-PB	3b	gi|22023983,gi|85725000,gi|18110149,gi|17933600	1
AGKPPAEAAQEGLR	CG1827-PA,CG1827-PB	2b	gi|28573318,gi|24652135	0
AGLEVYQGDAAAR	CG8042-PA,CG8042-PB	2b	gi|21356345,gi|24660536	1
AGLQFPVGR	CG31618-PA,CG33808-PA,CG33814-PA,CG33817-PA,CG33820-PA,CG33823-PA,CG33826-PA,CG33829-PA,CG33832-PA,CG33835-PA,CG33838-PA,CG33841-PA,CG33844-PA,CG33847-PA,CG33850-PA,CG33853-PA,CG33856-PA,CG33859-PA,CG33862-PA,CG33865-PA,CG5499-PA	3b	gi|24585673,gi|78706974,gi|78706992,gi|78707002,gi|78707012,gi|78707022,gi|78707032,gi|78707042,gi|78707052,gi|78707062,gi|78707072,gi|78707082,gi|78707092,gi|78707102,gi|78707112,gi|78707122,gi|78707132,gi|78707142,gi|78707152,gi|78707162,gi|17738227	1
AGLSMQVVR	CG4494-PA	1a	gi|17137634	1
AGNPVLNYLQSGDGQFVK	CG10924-PA,CG10924-PB	2b	gi|24655082,gi|161077226	1
AGNVFEFDVPVTGEPLPSK	CG32019-PA,CG32019-PC,CG32019-PD,CG32019-PE	2b	gi|28558739,gi|45552151,gi|45552153,gi|45552149	1
AGNVVHLYER	CG1516-PA,CG1516-PB,CG1516-PD,CG1516-PE,CG1516-PG,CG1516-PI,CG1516-PJ,CG1516-PK,CG1516-PL	2b	gi|24652210,gi|24652212,gi|24652214,gi|19921944,gi|24652216,gi|24652218,gi|24652220,gi|24652222,gi|24652224	1
AGPSDPSDVSK	CG32019-PA,CG32019-PC,CG32019-PD,CG32019-PE	2b	gi|28558739,gi|45552151,gi|45552153,gi|45552149	0
AGPSEPSQPTDNHLCK	CG32019-PA,CG32019-PC,CG32019-PD,CG32019-PE	2b	gi|28558739,gi|45552151,gi|45552153,gi|45552149	1
AGPVVDVLGDEMTR	CG7176-PA,CG7176-PB,CG7176-PC,CG7176-PD,CG7176-PE,CG7176-PF,CG7176-PG	2b	gi|24660860,gi|24660849,gi|21356561,gi|24660856,gi|24660864,gi|24660868,gi|28574947	1
AGQAIDQGVNR	CG1648-PA,CG1648-PB	2b	gi|19921938,gi|24652180	1
AGRNQKRPR	CG31132-PA	1a	gi|24649631	0
AGSEPYVPPPSYWNR	CG6803-PB,CG6803-PD	2a	gi|21357797,gi|24646986	0
AGSFQLNYR	CG32702-PA	1a	gi|24640838	0
AGSPSPTPVK	CG6803-PB	1a	gi|21357797	0
AGSSVFSVFSQK	CG2184-PA,CG2184-PB	2b	gi|17933672,gi|45552007	1
AGSVGRGASPAPR	CG17927-PA,CG17927-PB,CG17927-PC,CG17927-PD,CG17927-PE,CG17927-PF,CG17927-PG,CG17927-PH,CG17927-PI,CG17927-PJ	2a	gi|24584704,gi|24584710,gi|24584692,gi|24584702,gi|24584696,gi|24584700,gi|24584694,gi|28574239,gi|24584706,gi|24584698	0
AGTAIDNIEEDFR	CG4376-PA,CG4376-PB,CG4376-PC	2b	gi|24639238,gi|24639240,gi|17137758	1
AGVDHITNEK	CG17927-PA,CG17927-PC,CG17927-PD,CG17927-PE,CG17927-PF,CG17927-PG,CG17927-PH,CG17927-PI,CG17927-PJ	2a	gi|24584704,gi|24584692,gi|24584702,gi|24584696,gi|24584700,gi|24584694,gi|28574239,gi|24584706,gi|24584698	1
AGVLGQMEEFR	CG17927-PA,CG17927-PB,CG17927-PC,CG17927-PD,CG17927-PE,CG17927-PF,CG17927-PG,CG17927-PH,CG17927-PI,CG17927-PJ,CG17927-PK,CG17927-PL,CG17927-PM	2b	gi|24584704,gi|24584710,gi|24584692,gi|24584702,gi|24584696,gi|24584700,gi|24584694,gi|28574239,gi|24584706,gi|24584698,gi|24584712,gi|24584714,gi|24584716	1
AGVLGQMEEFRDER	CG17927-PA,CG17927-PB,CG17927-PC,CG17927-PD,CG17927-PE,CG17927-PF,CG17927-PG,CG17927-PH,CG17927-PI,CG17927-PJ,CG17927-PK,CG17927-PL,CG17927-PM	2b	gi|24584704,gi|24584710,gi|24584692,gi|24584702,gi|24584696,gi|24584700,gi|24584694,gi|28574239,gi|24584706,gi|24584698,gi|24584712,gi|24584714,gi|24584716	1
AGVYDPK	CG7998-PA	1a	gi|24647881	0
AHGGYSVFAGVGER	CG11154-PA	1a	gi|24638766	1
AHLADTGSTDLLQR	CG10236-PA	1a	gi|17136292	1
AIAEAALAEVK	CG5809-PA	1a	gi|19921434	1
AIAELGIYPAVDPLDSTSR	CG11154-PA	1a	gi|24638766	1
AIANECQANFISVK	CG2331-PA,CG2331-PB,CG2331-PC,CG2331-PD	2b	gi|17137560,gi|24652279,gi|161076486,gi|161076488	1
AIAQENITTVALK	CG18495-PA,CG18495-PB,CG30382-PA	3a	gi|24586400,gi|24586402,gi|24586406	1
AIATTYLDDLSR	CG17374-PA	1a	gi|62862516	0
AICSADAAAGVETCR	CG5009-PA	1a	gi|24654595	1
AIDFAEQYK	CG32702-PA	1a	gi|24640838	0
AIEEAIEK	CG2718-PB,CG2718-PC	1b	gi|17136208,gi|24580558	1
AIELALGK	CG4233-PA,CG4233-PB,CG4233-PC	2b	gi|24580970,gi|24580972,gi|19920542	1
AIELLGGK	CG4094-PA,CG4094-PB	2b	gi|24640177,gi|24640179	1
AIELNQNGAIWK	CG3481-PC,CG3481-PE,CG3481-PF,CG3481-PH,CG3481-PI	1b	gi|78706922,gi|78706930,gi|78706928,gi|78706926,gi|78706924	1
AIESGLVDPLAGGETTVEAYR	CG3059-PA,CG3059-PB,CG3059-PC,CG3059-PD	2b	gi|17137562,gi|24581283,gi|24581286,gi|24581288	1
AIFGDNMLR	CG3972-PA	1a	gi|17933498	1
AIFGESDALIAEK	CG2171-PA,CG2171-PB,CG2171-PC	2b	gi|28572004,gi|28572006,gi|28572008	1
AIFTTQVTSK	CG11137-PA	1a	gi|24668758	1
AIGTDEDLAHSSIR	CG12264-PA	1a	gi|20129463	1
AIIEILAR	CG5730-PA,CG5730-PB,CG5730-PC,CG5730-PD	2b	gi|17136266,gi|17136264,gi|45553447,gi|45553445	1
AIISADELAK	CG1977-PA	1a	gi|17136504	1
AILGLDLEQYR	CG8256-PA,CG8256-PB,CG8256-PC,CG8256-PD	1b	gi|24653942,gi|24653944,gi|20130025,gi|161077125	1
AILGTLPTDEQGK	CG4904-PA	1a	gi|17737405	1
AILIEDEGEQR	CG11198-PA,CG11198-PB,CG11198-PC,CG11198-PD	2b	gi|24586458,gi|24586460,gi|161076407,gi|161076409	1
AILSHVAPATEVGK	CG30344-PA	1a	gi|24652011	1
AINAAGPGEPSDASKPIITKPR	CG32019-PA,CG32019-PC,CG32019-PD,CG32019-PE	2b	gi|28558739,gi|45552151,gi|45552153,gi|45552149	1
AINEEGESDPLDSDDSIIAK	CG32019-PA,CG32019-PC,CG32019-PD,CG32019-PE	2b	gi|28558739,gi|45552151,gi|45552153,gi|45552149	1
AINEGGFQSLPQK	CG12140-PA	1a	gi|24652256	1
AINEYGEAVTTATMK	CG1915-PA,CG1915-PC	2b	gi|24655827,gi|161080703	0
AINNYGEDR	CG1915-PA,CG1915-PC	2b	gi|24655827,gi|161080703	0
AIQVYLVEK	CG10045-PA,CG10045-PB	1b	gi|17737923,gi|85725204	1
AISQAYEVLSDADKR	CG8863-PA,CG8863-PB,CG8863-PC,CG8863-PD,CG8863-PE	1b	gi|21357547,gi|24646556,gi|24646558,gi|24646560,gi|24646562	1
AIVEEISTPVASTPASK	CG3972-PA	1a	gi|17933498	1
AIVGASLAEILAK	CG9282-PA	1a	gi|19921254	1
AIVNVSDFTEEVK	CG33101-PA	1a	gi|28573010	1
AIVVTDGER	CG10120-PA,CG10120-PB	2b	gi|24646388,gi|24646386	1
AKEAGEDTTLIELNK	CG13887-PB,CG13887-PC	1b	gi|19923024,gi|24654889	1
AKLDNNEPLK	CG7176-PA,CG7176-PB,CG7176-PC,CG7176-PD,CG7176-PE,CG7176-PF,CG7176-PG	2b	gi|24660860,gi|24660849,gi|21356561,gi|24660856,gi|24660864,gi|24660868,gi|28574947	1
AKLEEVAAK	CG32031-PA,CG32031-PB,CG32031-PC,CG32031-PD,CG32031-PE,CG32031-PF	2b	gi|24661336,gi|24661340,gi|24661344,gi|24661348,gi|161082598,gi|161082600	1
ALAAGDVSISNCPK	CG3153-PA,CG3153-PB	1b	gi|24646746,gi|21358295	0
ALAEDVILR	CG17560-PA	1a	gi|24647494	0
ALAELSKPTPK	CG3321-PA,CG3321-PB	1b	gi|21358593,gi|24646815	1
ALAGCDLLTISPALLK	CG2827-PA	1a	gi|45549185	1
ALANAEELENPSK	CG9416-PA	1a	gi|28573701	0
ALDFIASK	CG4376-PA,CG4376-PB,CG4376-PC	2b	gi|24639238,gi|24639240,gi|17137758	1
ALDIFATK	CG1977-PA	1a	gi|17136504	1
ALDPLLAR	CG9092-PA	1a	gi|24582088	0
ALDSDWFCK	CG4581-PA	1a	gi|17137578	1
ALDSMQASLEAEAK	CG17927-PA,CG17927-PB,CG17927-PC,CG17927-PD,CG17927-PE,CG17927-PF,CG17927-PG,CG17927-PH,CG17927-PI,CG17927-PJ,CG17927-PK,CG17927-PL,CG17927-PM	2b	gi|24584704,gi|24584710,gi|24584692,gi|24584702,gi|24584696,gi|24584700,gi|24584694,gi|28574239,gi|24584706,gi|24584698,gi|24584712,gi|24584714,gi|24584716	1
ALDSTNCTEHEK	CG33149-PA	1a	gi|28573630	1
ALEFDPDNNTVSTSGGK	CG14997-PA,CG14997-PB	1b	gi|24657386,gi|24657391	1
ALEGINVK	CG4087-PA	1a	gi|17136320	1
ALEHYTDLYDIK	CG9012-PA,CG9012-PB,CG9012-PC,CG9012-PD,CG9012-PE,CG9012-PF	1b	gi|17137000,gi|24642310,gi|45555333,gi|45555323,gi|161077848,gi|161077850	1
ALELHAPK	CG5700-PB	1a	gi|24663043	0
ALENLEAVLK	CG15261-PA	1a	gi|19921376	1
ALEQQIK	CG17927-PA,CG17927-PB,CG17927-PC,CG17927-PD,CG17927-PE,CG17927-PF,CG17927-PG,CG17927-PH,CG17927-PI,CG17927-PJ,CG17927-PK,CG17927-PL,CG17927-PM,CG9279-PA,CG9279-PB	3b	gi|24584704,gi|24584710,gi|24584692,gi|24584702,gi|24584696,gi|24584700,gi|24584694,gi|28574239,gi|24584706,gi|24584698,gi|24584712,gi|24584714,gi|24584716,gi|24666806,gi|24666810	0
ALESTNAR	CG10652-PA,CG10652-PB	1b	gi|17864264,gi|24585096	1
ALGEQVIQEEAK	CG10097-PA,CG10097-PB	2b	gi|24646271,gi|78706758	0
ALGLPIERPK	CG3861-PA,CG3861-PB	2b	gi|24640126,gi|24640124	1
ALGPDATNLSLVK	CG3523-PA	1a	gi|19920632	1
ALGQNPTESDVK	CG3201-PA	1a	gi|17530801	1
ALIAAQYSGAQVK	CG11901-PA,CG11901-PB	1b	gi|24651001,gi|24651003	1
ALIELR	CG6684-PA,CG6684-PB	1b	gi|24645865,gi|24645867	0
ALKEPPR	CG3195-PA,CG3195-PB,CG3195-PC	1b	gi|17864452,gi|24762533,gi|24762535	0
ALLWDLNDGK	CG7111-PA	1a	gi|17137396	1
ALNALCNGLMK	CG6543-PA,CG6543-PB	1b	gi|20129971,gi|24653477	1
ALNIYK	CG8454-PA,CG9512-PA	3b	gi|21355789,gi|18859993	0
ALNLNPTLALIEK	CG5596-PA,CG5596-PB	2b	gi|17136338,gi|17136340	1
ALNLYK	CG17866-PA,CG7712-PA	3b	gi|161076299,gi|19922002	0
ALNNFITLK	CG3989-PA	1a	gi|18860083	1
ALNSFEGYK	CG1640-PA,CG1640-PB,CG1640-PC,CG1640-PD,CG1640-PE,CG1640-PF	2b	gi|24641760,gi|45551451,gi|24641764,gi|24641766,gi|24641768,gi|24641770	1
ALNVTSVTGQVVAGR	CG8066-PA	1a	gi|24646857	1
ALQASVLR	CG6058-PA,CG6058-PB,CG6058-PC,CG6058-PD,CG6058-PE,CG6058-PF,CG6058-PG,CG6058-PH	2b	gi|45551983,gi|24650278,gi|24650280,gi|24650282,gi|24650288,gi|24650276,gi|45551985,gi|45553577	1
ALQAVYPDYVDELSLYGSK	CG6904-PA,CG6904-PB,CG6904-PC	2b	gi|45551893,gi|21357845,gi|24646982	1
ALQEQQQELAR	CG33715-PD	1a	gi|161076705	0
ALQNAESEVAALNR	CG4898-PD,CG4898-PF,CG4898-PG,CG4898-PJ,CG4898-PK,CG4898-PL	2a	gi|24647073,gi|45551898,gi|24647075,gi|24647077,gi|45553377,gi|45553375	1
ALQNTEWAR	CG3359-PB,CG3359-PC,CG3359-PD,CG3359-PE,CG3359-PF,CG3359-PG,CG3359-PH,CG3359-PI,CG3359-PJ,CG3359-PK,CG3359-PL,CG3359-PM,CG3359-PN,CG3359-PO,CG3359-PP	2b	gi|24646161,gi|24646163,gi|28573039,gi|28573041,gi|28573043,gi|28573045,gi|28573047,gi|28573049,gi|28573051,gi|28573053,gi|28573061,gi|28573055,gi|28573057,gi|28573059,gi|28573037	0
ALQPQAGFVTGAQAK	CG1099-PA,CG1099-PB	2b	gi|17137488,gi|17137490	1
ALQPTVTDIPSATQLSK	CG6831-PA	1a	gi|21355751	1
ALQTVPNIEK	CG3322-PA	1a	gi|17737557	0
ALSALMTFK	CG5320-PA,CG5320-PF	2a	gi|45549226,gi|45553475	1
ALSDEANELLPIFNK	CG8808-PA,CG8808-PB	2b	gi|17137298,gi|161076454	1
ALSEVVGKPLPYDNLDELR	CG2286-PA,CG2286-PB	1b	gi|24640557,gi|24640559	1
ALSNLADVEEK	CG2774-PA	1a	gi|24581429	1
ALSSCCPVTGDVYR	CG6871-PA	1a	gi|17981717	1
ALTGGIAMLFK	CG7430-PA	1a	gi|21358499	1
ALTIQASDR	CG7461-PA	1a	gi|24655582	1
ALTLGDNVLSVSQPR	CG2050-PA	1a	gi|24651794	1
ALTNYLNTEPFTTFSEETSR	CG6544-PA	1a	gi|45550732	1
ALTVAELTQQMFDAK	CG4869-PA	1a	gi|24650776	1
ALTVPELTQQMFDAK	CG3401-PA,CG9277-PA,CG9277-PB,CG9277-PC,CG9277-PD,CG9359-PA	3b	gi|22024031,gi|24655741,gi|24655737,gi|24655746,gi|28573700,gi|24645350	1
ALVAFYQK	CG4046-PA	1a	gi|19922746	1
ALVCEQEAR	CG4898-PB,CG4898-PD,CG4898-PE,CG4898-PF,CG4898-PG,CG4898-PJ,CG4898-PK,CG4898-PL	2a	gi|45551896,gi|24647073,gi|45551900,gi|45551898,gi|24647075,gi|24647077,gi|45553377,gi|45553375	1
ALVDGAWVDSSNAK	CG4685-PA,CG4685-PB,CG4685-PC,CG4685-PD	1b	gi|21356737,gi|62472936,gi|62472926,gi|62472918	1
ALVFDPK	CG11901-PA,CG11901-PB	1b	gi|24651001,gi|24651003	0
ALVTETSVLDADEGIR	CG3861-PA,CG3861-PB	2b	gi|24640126,gi|24640124	1
ALVVINPGNPTGQVLTR	CG1640-PA,CG1640-PB,CG1640-PC,CG1640-PD,CG1640-PE,CG1640-PF	2b	gi|24641760,gi|45551451,gi|24641764,gi|24641766,gi|24641768,gi|24641770	1
ALVYEVVANR	CG16965-PA	1a	gi|24583760	0
ALYENESANEAALSK	CG10672-PA	1a	gi|21355319	1
ALYLGDNDFEYIPK	CG9031-PA	1a	gi|45550188	1
AMAGIGTNDTQLIR	CG9968-PA,CG9968-PB	2b	gi|17736989,gi|24642523	1
AMDGGADVKPAAAAPAAAAGVPEANITSGGSSR	CG3523-PA	1a	gi|19920632	1
AMNGAGTDDATLIR	CG33487-PA,CG33491-PA,CG33496-PA,CG33498-PA,CG9579-PA	3b	gi|45556087,gi|45556061,gi|45556079,gi|56326232,gi|17136288	1
AMNVYSEVK	CG8189-PA,CG8189-PB	2b	gi|24661884,gi|24661888	0
AMQDSFTSAIIPLSTDR	CG1635-PA	1a	gi|28571955	0
AMVDAAR	CG17927-PA,CG17927-PB,CG17927-PC,CG17927-PD,CG17927-PE,CG17927-PF,CG17927-PG,CG17927-PH,CG17927-PI,CG17927-PJ,CG17927-PK,CG17927-PL,CG17927-PM	2b	gi|24584704,gi|24584710,gi|24584692,gi|24584702,gi|24584696,gi|24584700,gi|24584694,gi|28574239,gi|24584706,gi|24584698,gi|24584712,gi|24584714,gi|24584716	0
AMVGIVAGGGR	CG1263-PA,CG1263-PB	1b	gi|17864318,gi|24656124	1
ANADATSWQNK	CG5939-PA,CG5939-PB	1b	gi|24661112,gi|24661116	0
ANAEAQVWR	CG17927-PA,CG17927-PB,CG17927-PC,CG17927-PD,CG17927-PE,CG17927-PF,CG17927-PG,CG17927-PH,CG17927-PI,CG17927-PJ,CG17927-PK,CG17927-PL,CG17927-PM	2b	gi|24584704,gi|24584710,gi|24584692,gi|24584702,gi|24584696,gi|24584700,gi|24584694,gi|28574239,gi|24584706,gi|24584698,gi|24584712,gi|24584714,gi|24584716	0
ANAIANAAEK	CG17927-PA,CG17927-PB,CG17927-PC,CG17927-PD,CG17927-PE,CG17927-PF,CG17927-PG,CG17927-PH,CG17927-PI,CG17927-PJ,CG17927-PK,CG17927-PL,CG17927-PM	2b	gi|24584704,gi|24584710,gi|24584692,gi|24584702,gi|24584696,gi|24584700,gi|24584694,gi|28574239,gi|24584706,gi|24584698,gi|24584712,gi|24584714,gi|24584716	1
ANALQNELEESR	CG17927-PA,CG17927-PB,CG17927-PC,CG17927-PD,CG17927-PE,CG17927-PF,CG17927-PG,CG17927-PH,CG17927-PI,CG17927-PJ,CG17927-PK,CG17927-PL,CG17927-PM	2b	gi|24584704,gi|24584710,gi|24584692,gi|24584702,gi|24584696,gi|24584700,gi|24584694,gi|28574239,gi|24584706,gi|24584698,gi|24584712,gi|24584714,gi|24584716	1
ANDLSQTLAEEEEK	CG15792-PA,CG15792-PB,CG15792-PC,CG15792-PD	2b	gi|24762816,gi|24762818,gi|62471820,gi|62471805	1
ANDVVYVEDK	CG1665-PA	1a	gi|45550400	1
ANEVASMVLVGDVK	CG6767-PA,CG6767-PB	2b	gi|21355239,gi|45551540	1
ANFDQEINTAK	CG32593-PA,CG32593-PB,CG32593-PC,CG32593-PD,CG32593-PE,CG32593-PF	2b	gi|24642027,gi|24642031,gi|24642061,gi|24642065,gi|24642029,gi|24642033	1
ANIVGPWIER	CG4376-PA,CG4376-PB,CG4376-PC	2b	gi|24639238,gi|24639240,gi|17137758	1
ANNSEYGLAAAVFTK	CG3752-PA	1a	gi|20129399	1
ANNVDFMDAEALK	CG7283-PA	1a	gi|24662946	1
ANNVDFMDAEALKK	CG7283-PA	1a	gi|24662946	1
ANQDSDTESPSVSYTPSPAK	CG33113-PF	1a	gi|28574660	1
ANQIKDQIEDTTSEYEK	CG12101-PA,CG12101-PB	1b	gi|24641191,gi|24641193	1
ANQREEEYKNQIK	CG4898-PB,CG4898-PD,CG4898-PE,CG4898-PF,CG4898-PG,CG4898-PJ,CG4898-PK	2a	gi|45551896,gi|24647073,gi|45551900,gi|45551898,gi|24647075,gi|24647077,gi|45553377	1
ANSELESDAK	CG10236-PA	1a	gi|17136292	0
ANSLENPNAEFR	CG8453-PA	1a	gi|24652913	0
ANTELEEK	CG4843-PA,CG4843-PB,CG4843-PC	2b	gi|28571726,gi|24647095,gi|45551906	1
ANTELEEKEK	CG4843-PA,CG4843-PB,CG4843-PC	2b	gi|28571726,gi|24647095,gi|45551906	1
ANTPATSSAGPVLR	CG14028-PA	1a	gi|24581914	0
ANWAAVGSLSTNER	CG5413-PA,CG5413-PB,CG5413-PC	2b	gi|24647665,gi|24647667,gi|24647669	1
ANYIVGGLR	CG3752-PA	1a	gi|20129399	1
APADPEAFK	CG10045-PA,CG10045-PB	1b	gi|17737923,gi|85725204	1
APADPEAFKK	CG10045-PA,CG10045-PB	1b	gi|17737923,gi|85725204	1
APDSYVTVTK	CG5700-PB	1a	gi|24663043	0
APEDDGGASITGYIVER	CG32019-PA,CG32019-PC,CG32019-PD,CG32019-PE	2b	gi|28558739,gi|45552151,gi|45552153,gi|45552149	1
APEEQPTDFTFATK	CG1915-PC	1a	gi|161080703	0
APEGEGCPR	CG1019-PA,CG1019-PB	1b	gi|17137134,gi|24644746	1
APELLSQIEAK	CG5080-PA,CG5080-PB	1b	gi|24580801,gi|19920502	1
APFGDELPAK	CG9244-PB,CG9244-PC	2b	gi|17864292,gi|161076999	1
APGAPGEEEVGHTK	CG3564-PA	1a	gi|18921123	1
APGFAHLAALEK	CG1970-PA	1a	gi|24638644	1
APGIIPR	CG3612-PA	1a	gi|24658560	0
APIQELGSDLR	CG6831-PA	1a	gi|21355751	1
APIQIITGSAGCK	CG1637-PC	1a	gi|20129007	1
APIRPDVVNEVHQLLR	CG5502-PA	1a	gi|24650747	1
APIVEMFEAEGSPYYSTAR	CG3267-PA	1a	gi|24586065	1
APLPLNYNPLLVMK	CG2107-PA	1a	gi|24656312	1
APLVEEGMTPK	CG30296-PC,CG30296-PD,CG30296-PE,CG30296-PG	2a	gi|161077298,gi|161077296,gi|161077300,gi|161077304	1
APPPPPEDDGYR	CG7445-PA	1a	gi|17737667	1
APPSYSDLGK	CG6647-PA,CG6647-PB,CG6647-PC	1b	gi|17136632,gi|19550069,gi|85724932	0
APQDGDVVELVR	CG7910-PA	1a	gi|24644968	0
APQPPSSWQGVR	CG6018-PA	1a	gi|24658187	0
APSEGSSQQPQAFR	CG33484-PA,CG33484-PB,CG33484-PC,CG33484-PD	2b	gi|45580802,gi|116007758,gi|116007760,gi|116007762	0
APSVQEPLQDVVSELDK	CG1915-PC	1a	gi|161080703	0
APTIAAPVVEPKPEPPKPK	CG33113-PF	1a	gi|28574660	1
APVAQNSSAMLTDMVK	CG6750-PA	1a	gi|24583513	1
APVFTVPLENIENLR	CG1915-PA,CG1915-PC	2b	gi|24655827,gi|161080703	1
APVINSISQSYR	CG9280-PA,CG9280-PB,CG9280-PC	1b	gi|17137794,gi|24582896,gi|24582898	1
AQAPAQLGLTFR	CG4204-PA	1a	gi|17738069	1
AQDFDTLR	CG17285-PA,CG17285-PB	2b	gi|24664081,gi|24664085	0
AQDLAAQYTDMTASAEPAIK	CG10236-PA	1a	gi|17136292	1
AQDNVEFNWFR	CG33950-PA,CG33950-PB,CG33950-PC,CG33950-PD,CG33950-PE,CG33950-PF,CG33950-PG	2b	gi|78706472,gi|78706470,gi|78706464,gi|78706466,gi|78706468,gi|78706474,gi|161077537	1
AQDVSLQLTYPENGK	CG15043-PA	1a	gi|24643050	0
AQDVTLESAITK	CG9006-PA	1a	gi|24652780	1
AQEIAQENR	CG3267-PA	1a	gi|24586065	1
AQEINDLNAQVNDLR	CG7178-PD,CG7178-PE	1b	gi|24642955,gi|24642957	1
AQELWELIVK	CG7107-PA,CG7107-PB,CG7107-PD,CG7107-PE,CG7107-PF,CG7107-PG	2b	gi|24641813,gi|24641811,gi|24641815,gi|62473677,gi|62473664,gi|62473654	1
AQEPTSHPAENENQQEQDAAVETPK	CG14476-PA,CG14476-PB,CG14476-PC,CG14476-PD,CG14476-PE	1b	gi|24643746,gi|21357605,gi|24643749,gi|24643751,gi|24643753	1
AQFVSAENYQNFE	CG8602-PA	1a	gi|21356765	1
AQGDFNEFIEK	CG11051-PA	1a	gi|21358539	1
AQGESAAGEDADIVISGLSGK	CG3524-PA	1a	gi|24581345	1
AQIWDTAGQER	CG5771-PA,CG5771-PB	1b	gi|19549675,gi|17137216	1
AQLELSQVR	CG17927-PA,CG17927-PB,CG17927-PC,CG17927-PD,CG17927-PE,CG17927-PF,CG17927-PG,CG17927-PH,CG17927-PI,CG17927-PJ,CG17927-PK,CG17927-PL,CG17927-PM	2b	gi|24584704,gi|24584710,gi|24584692,gi|24584702,gi|24584696,gi|24584700,gi|24584694,gi|28574239,gi|24584706,gi|24584698,gi|24584712,gi|24584714,gi|24584716	1
AQLEYHLEAER	CG6455-PA	1a	gi|45549224	1
AQLHAGDDEEADDPIR	CG5685-PA,CG5685-PB,CG5685-PC	1b	gi|24648584,gi|24648586,gi|24648588	1
AQLQQGLVK	CG9012-PA,CG9012-PB,CG9012-PC,CG9012-PD,CG9012-PE,CG9012-PF	1b	gi|17137000,gi|24642310,gi|45555333,gi|45555323,gi|161077848,gi|161077850	1
AQNEELEDDLQLTEDAK	CG15792-PA,CG15792-PB,CG15792-PC,CG15792-PD	2b	gi|24762816,gi|24762818,gi|62471820,gi|62471805	1
AQQEEEDRIQAER	CG9280-PA,CG9280-PB,CG9280-PC	1b	gi|17137794,gi|24582896,gi|24582898	0
AQQELEEAEER	CG17927-PA,CG17927-PB,CG17927-PC,CG17927-PD,CG17927-PE,CG17927-PF,CG17927-PG,CG17927-PH,CG17927-PI,CG17927-PJ,CG17927-PK,CG17927-PL,CG17927-PM	2b	gi|24584704,gi|24584710,gi|24584692,gi|24584702,gi|24584696,gi|24584700,gi|24584694,gi|28574239,gi|24584706,gi|24584698,gi|24584712,gi|24584714,gi|24584716	1
AQQWAVPYVETSAK	CG2849-PA,CG2849-PB,CG2849-PC	2b	gi|24639552,gi|24639550,gi|17933550	1
AQSDSTAVAASR	CG5870-PA	1a	gi|17647191	1
AQVTLASILK	CG1721-PA,CG1721-PB,CG1721-PC	1b	gi|24650981,gi|85725272,gi|85725270	1
AQYEEQMQINR	CG6944-PA	1a	gi|17136290	1
AQYFIK	CG7490-PA	1a	gi|17737731	0
AQYLQSVEDR	CG3283-PA	1a	gi|17137106	1
AQYPEYFAK	CG9306-PA	1a	gi|19921244	1
ASAEDNLCHSFQSFNTCYK	CG3731-PA,CG3731-PB	1b	gi|24646943,gi|21357875	1
ASATPSHPPTQQMVDASIK	CG31617-PA,CG33801-PA,CG33804-PA,CG33807-PA,CG33810-PA,CG33813-PA,CG33816-PA,CG33819-PA,CG33822-PA,CG33825-PA,CG33828-PA,CG33831-PA,CG33837-PA,CG33840-PA,CG33843-PA,CG33846-PA,CG33849-PA,CG33852-PA,CG33855-PA,CG33858-PA,CG33861-PA,CG33864-PA	3b	gi|24585669,gi|78706954,gi|78706962,gi|78706970,gi|78706980,gi|78706988,gi|78706998,gi|78707008,gi|78707018,gi|78707028,gi|78707038,gi|78707048,gi|78707068,gi|78707078,gi|78707088,gi|78707098,gi|78707108,gi|78707118,gi|78707128,gi|78707138,gi|78707148,gi|78707158	1
ASAVNTLADLLVSR	CG7470-PA	1a	gi|21357643	1
ASCHIGGNVSTNAGGVR	CG3835-PA,CG3835-PB,CG3835-PC	1b	gi|18921117,gi|24639275,gi|24639277	1
ASCNTDYYTR	CG7010-PA,CG7010-PB,CG7010-PC,CG7010-PD	2b	gi|28571106,gi|24639746,gi|24639740,gi|24639744	1
ASDIQLEFVR	CG9022-PA	1a	gi|24640745	1
ASDKDDEDEDDDDEEKDDESK	CG9429-PA	1a	gi|24645441	1
ASDPIQQLFLDK	CG4412-PA	1a	gi|17137260	1
ASDYEQGPAAFDELK	CG6603-PA,CG6603-PB,CG6603-PC	1b	gi|21357475,gi|24664044,gi|24664047	1
ASENESFMANIFR	CG7461-PA	1a	gi|24655582	1
ASESANDHASTSAGTSKDED	CG9446-PA,CG9446-PB,CG9446-PC	1b	gi|24586098,gi|24586100,gi|45552461	1
ASFLAQNSSQVVK	CG17332-PA,CG17332-PB,CG17332-PD	2b	gi|24584671,gi|24584673,gi|24584675	1
ASGQHQLQQSVDMGGNLQQAK	CG33484-PA,CG33484-PB,CG33484-PC,CG33484-PD	2b	gi|45580802,gi|116007758,gi|116007760,gi|116007762	0
ASGSAGTKAKKASATPSHPPTQQMVDASIK	CG31617-PA,CG33801-PA,CG33804-PA,CG33807-PA,CG33810-PA,CG33813-PA,CG33816-PA,CG33819-PA,CG33822-PA,CG33825-PA,CG33828-PA,CG33831-PA,CG33837-PA,CG33840-PA,CG33843-PA,CG33846-PA,CG33849-PA,CG33852-PA,CG33855-PA,CG33858-PA,CG33861-PA,CG33864-PA	3b	gi|24585669,gi|78706954,gi|78706962,gi|78706970,gi|78706980,gi|78706988,gi|78706998,gi|78707008,gi|78707018,gi|78707028,gi|78707038,gi|78707048,gi|78707068,gi|78707078,gi|78707088,gi|78707098,gi|78707108,gi|78707118,gi|78707128,gi|78707138,gi|78707148,gi|78707158	0
ASGTCQLTFDNVR	CG3902-PA	1a	gi|24666513	1
ASLADEFPR	CG33715-PB,CG33715-PD	2a	gi|161076702,gi|161076705	0
ASNTAEVYFEDVK	CG7461-PA	1a	gi|24655582	1
ASPENILEALSEK	CG18255-PA,CG18255-PD	2a	gi|24653966,gi|24653978	0
ASPQVAGSYLCK	CG3624-PA	1a	gi|19922742	0
ASPVELLSLSNPVFK	CG1742-PA	1a	gi|24643618	0
ASQIAPVHGTPYLR	CG32092-PB	1a	gi|24662922	0
ASQQGVAAPATVK	CG17838-PA,CG17838-PB,CG17838-PC,CG17838-PD,CG17838-PE,CG17838-PF,CG17838-PH	2a	gi|45551939,gi|161078444,gi|161078446,gi|24648522,gi|24648520,gi|24648528,gi|161078453	1
ASQSEIDAYK	CG6030-PA,CG6030-PB	1b	gi|17738043,gi|24648125	0
ASQSEIDAYKK	CG6030-PA,CG6030-PB	1b	gi|17738043,gi|24648125	1
ASQYQITVEELR	CG11527-PA	1a	gi|17136984	1
ASRPYSSYLDSPSYR	CG6803-PA,CG6803-PB,CG6803-PC,CG6803-PD,CG6803-PE	2b	gi|24646989,gi|21357797,gi|24646991,gi|24646986,gi|24646984	1
ASSDYSYTSK	CG6544-PC	1a	gi|24645757	0
ASSLEPLDELFER	CG6803-PB,CG6803-PD	2a	gi|21357797,gi|24646986	1
ASSQSGGIIQQSQSEVHANDK	CG5700-PB	1a	gi|24663043	1
ASTSTPVGGASTSSR	CG10119-PA	1a	gi|24653664	0
ASVFAPSPETYVR	CG1444-PA	1a	gi|24640442	1
ATAADSGEYTVR	CG1915-PA,CG1915-PC	2b	gi|24655827,gi|161080703	0
ATAEAICR	CG3725-PA,CG3725-PB,CG3725-PC,CG3725-PD,CG3725-PE,CG3725-PF,CG3725-PG,CG3725-PH	2b	gi|17136664,gi|24762445,gi|24762447,gi|24762449,gi|24762451,gi|24762453,gi|24762455,gi|24762457	0
ATCVAFLNIR	CG33484-PA,CG33484-PB,CG33484-PC,CG33484-PD	2b	gi|45580802,gi|116007758,gi|116007760,gi|116007762	0
ATDADADITQK	CG5840-PA,CG5840-PB	2b	gi|21358587,gi|24647700	1
ATDAYNFYTTGQAK	CG8443-PA	1a	gi|20130037	1
ATDGVIEGIAIGGDR	CG8322-PA,CG8322-PB	1b	gi|24653988,gi|24653990	1
ATDNVAEIILR	CG9297-PA,CG9297-PB	2b	gi|28571703,gi|28571705	1
ATDQTFSEK	CG17927-PA,CG17927-PB,CG17927-PC,CG17927-PD,CG17927-PE,CG17927-PF,CG17927-PG,CG17927-PH,CG17927-PI,CG17927-PJ,CG17927-PK,CG17927-PL,CG17927-PM	2b	gi|24584704,gi|24584710,gi|24584692,gi|24584702,gi|24584696,gi|24584700,gi|24584694,gi|28574239,gi|24584706,gi|24584698,gi|24584712,gi|24584714,gi|24584716	0
ATEIIIK	CG17927-PA,CG17927-PE,CG17927-PG,CG17927-PH,CG17927-PJ	2a	gi|24584704,gi|24584696,gi|24584694,gi|28574239,gi|24584698	0
ATELILK	CG33715-PD	1a	gi|161076705	0
ATENWFIK	CG8844-PA,CG8844-PB	1b	gi|21356165,gi|24581441	0
ATESSPEVEK	CG6155-PA	1a	gi|24653432	1
ATEVIYK	CG16944-PA,CG16944-PB,CG16944-PC,CG16944-PD	2b	gi|18079273,gi|24641095,gi|24641090,gi|24641092	1
ATGFEAFLAK	CG11661-PA,CG11661-PB,CG11661-PC,CG11661-PF,CG11661-PG,CG11661-PH,CG11661-PI	2a	gi|24665669,gi|24665673,gi|24665677,gi|28574590,gi|28574592,gi|161084450,gi|161084461	1
ATGGSYIGSQSMK	CG12323-PA,CG12323-PB	1b	gi|21355573,gi|24652553	1
ATIGADFCTK	CG5915-PA	1a	gi|17865835	1
ATINMLR	CG4897-PA	1a	gi|24583248	1
ATIPDLVEGQTYK	CG32019-PA,CG32019-PC,CG32019-PD,CG32019-PE	2b	gi|28558739,gi|45552151,gi|45552153,gi|45552149	1
ATLIQR	CG11488-PA,CG18255-PA,CG18255-PD	3b	gi|17647667,gi|24653966,gi|24653978	0
ATLYPCPEAPADR	CG1709-PA,CG1709-PB,CG1709-PC,CG1709-PD,CG1709-PE,CG1709-PF,CG1709-PG,CG1709-PH	2b	gi|24650959,gi|24650965,gi|24650956,gi|24650967,gi|21358171,gi|24650961,gi|24650963,gi|45551995	1
ATLYPYLLEK	CG14724-PA,CG14724-PB	1b	gi|17137302,gi|24646112	1
ATNCTVTPCFGER	CG6281-PA,CG6281-PB	1b	gi|24645636,gi|24645638	0
ATNLIISSLR	CG2107-PA	1a	gi|24656312	0
ATNPIAMDTIFR	CG10924-PA,CG10924-PB	2b	gi|24655082,gi|161077226	0
ATNQLGEAVNTCNVR	CG1915-PA,CG1915-PC	2b	gi|24655827,gi|161080703	0
ATNQVGEAVSTSSLK	CG1915-PA,CG1915-PC	2b	gi|24655827,gi|161080703	0
ATNVHFSGRETPYLALPADYMGNQLK	CG33950-PA,CG33950-PB,CG33950-PC,CG33950-PD,CG33950-PE,CG33950-PF,CG33950-PG	2b	gi|78706472,gi|78706470,gi|78706464,gi|78706466,gi|78706468,gi|78706474,gi|161077537	0
ATPFIECNGAK	CG4145-PA,CG4145-PB,CG4145-PC	1b	gi|24581820,gi|24581822,gi|24581824	1
ATQAEMQAALESNK	CG17896-PA,CG17896-PB	2b	gi|24638878,gi|24638876	1
ATSPDSSDVIIAR	CG8505-PA	1a	gi|28573391	1
ATSTGPGTADVNIEYIQDLSSLSR	CG5939-PA,CG5939-PB	1b	gi|24661112,gi|24661116	1
ATSVQWFR	CG1915-PA,CG1915-PC	2b	gi|24655827,gi|161080703	0
ATSVRPQFDGLAFPPR	CG17927-PA,CG17927-PB,CG17927-PC,CG17927-PD,CG17927-PE,CG17927-PF,CG17927-PG,CG17927-PH,CG17927-PI,CG17927-PJ	2a	gi|24584704,gi|24584710,gi|24584692,gi|24584702,gi|24584696,gi|24584700,gi|24584694,gi|28574239,gi|24584706,gi|24584698	1
ATTEECIGPK	CG2520-PA	1a	gi|24644772	0
ATTPVEFVMEVTDK	CG4347-PA,CG4347-PC	2b	gi|62484278,gi|62484452	1
ATVDMQQK	CG15168-PA	1a	gi|19921518	0
ATVPTLNENCEYEFR	CG32019-PA,CG32019-PC,CG32019-PD,CG32019-PE	2b	gi|28558739,gi|45552151,gi|45552153,gi|45552149	0
AVAATSNDPQR	CG14981-PA	1a	gi|17647639	1
AVAATSNDPQRENYDDEPDETASER	CG14981-PA	1a	gi|17647639	1
AVADQAGIVGHYVETAK	CG5903-PA	1a	gi|21357927	1
AVANTTAALVLR	CG6831-PA	1a	gi|21355751	1
AVATDEASEGVDLLR	CG4586-PA	1a	gi|24640268	0
AVDCDSVPKPNTMEQLQPVTR	CG6579-PA	1a	gi|24583867	1
AVDLTDWDKDHADLK	CG32019-PA,CG32019-PC,CG32019-PD,CG32019-PE	2b	gi|28558739,gi|45552151,gi|45552153,gi|45552149	1
AVDSLVPIGR	CG3612-PA	1a	gi|24658560	1
AVDYVVPGPGK	CG7176-PA,CG7176-PB,CG7176-PC,CG7176-PD,CG7176-PE,CG7176-PF,CG7176-PG	2b	gi|24660860,gi|24660849,gi|21356561,gi|24660856,gi|24660864,gi|24660868,gi|28574947	1
AVEDKDIGPLVK	CG2286-PA,CG2286-PB	1b	gi|24640557,gi|24640559	1
AVEILADIIQNSK	CG3731-PA,CG3731-PB	1b	gi|24646943,gi|21357875	1
AVENGENSLWTTLK	CG6455-PA	1a	gi|45549224	1
AVEQGDNTLK	CG3322-PA	1a	gi|17737557	0
AVESPQNLAELTSDAELLR	CG33715-PB,CG33715-PD	2a	gi|161076702,gi|161076705	0
AVETSLLAAAELAK	CG11876-PA,CG11876-PD	1b	gi|24650940,gi|21358145	1
AVEVEQCR	CG33950-PA,CG33950-PB,CG33950-PC,CG33950-PD,CG33950-PE,CG33950-PF,CG33950-PG	2b	gi|78706472,gi|78706470,gi|78706464,gi|78706466,gi|78706468,gi|78706474,gi|161077537	0
AVFFVER	CG15081-PA,CG15081-PB,CG15081-PC,CG15081-PD,CG15081-PE,CG15081-PF	2b	gi|161077238,gi|161077236,gi|161077234,gi|161077240,gi|161077242,gi|161077244	1
AVFPSIVGRPR	CG10067-PA,CG12051-PA,CG18290-PA,CG18290-PB,CG4027-PA,CG4027-PB,CG4027-PC,CG4027-PD,CG5178-PA,CG5409-PA,CG7478-PA	3b	gi|17647135,gi|17647133,gi|17137090,gi|24646579,gi|24639997,gi|17530805,gi|62473526,gi|62473515,gi|17975545,gi|17136990,gi|17975540	1
AVFSNLGIQCVK	CG6667-PA,CG6667-PB,CG6667-PC	2b	gi|24584822,gi|24584824,gi|24584826	0
AVFVDLEPTVVDEVR	CG1913-PA,CG2512-PA,CG2512-PB,CG9476-PA	3b	gi|17136564,gi|17737821,gi|24644849,gi|17865841	1
AVGHVNDTLGPELIK	CG17654-PA,CG17654-PB,CG17654-PC,CG17654-PD,CG17654-PE	2b	gi|17137654,gi|24580914,gi|24580916,gi|24580918,gi|24580920	1
AVGQDLGQSGSCMMR	CG16858-PA	1a	gi|17137252	1
AVIAESYER	CG4900-PA,CG6342-PA	3b	gi|17137564,gi|24645686	0
AVIAVDQDELGIQGR	CG7997-PA,CG7997-PB	1b	gi|19922382,gi|24654142	1
AVIDPQSISDPQVIK	CG32528-PA	1a	gi|24643390	1
AVIELENYGMPFSR	CG17246-PA,CG17246-PB,CG17246-PC	1b	gi|17137288,gi|24655642,gi|24655647	1
AVIIYVPIPQQK	CG1883-PA,CG1883-PB,CG1883-PC,CG1883-PD	2b	gi|21358459,gi|24651339,gi|24651337,gi|45553763	1
AVLAQFADNNPALFK	CG3415-PA	1a	gi|18859837	1
AVLIDLEPGTMDSVR	CG4869-PA	1a	gi|24650776	1
AVLVDESTSKPLAVHQAFVR	CG6370-PA	1a	gi|19922486	1
AVLVDLEPGTMDSVR	CG9277-PA,CG9277-PB	2a	gi|24655741,gi|24655737	1
AVNAIGESDPLEAVNTIIAK	CG32019-PA,CG32019-PC,CG32019-PD,CG32019-PE	2b	gi|28558739,gi|45552151,gi|45552153,gi|45552149	1
AVNAIGQSDPATFK	CG32019-PA,CG32019-PC,CG32019-PD,CG32019-PE	2b	gi|28558739,gi|45552151,gi|45552153,gi|45552149	1
AVNALGQAVSSTNLR	CG1915-PA,CG1915-PC	2b	gi|24655827,gi|161080703	0
AVNDLTDSYGQEWTYR	CG5670-PA,CG5670-PB,CG5670-PC,CG5670-PE,CG5670-PF,CG5670-PG,CG5670-PH	2a	gi|24648576,gi|24648578,gi|24648580,gi|45553441,gi|45553439,gi|45553437,gi|45553435	1
AVNEEGESEPLETESAITAK	CG32019-PA,CG32019-PC,CG32019-PD,CG32019-PE	2b	gi|28558739,gi|45552151,gi|45552153,gi|45552149	1
AVNELGQAVTSASLIVQSK	CG1915-PA,CG1915-PC	2b	gi|24655827,gi|161080703	0
AVNGVFLYK	CG11151-PA	1a	gi|18859687	1
AVNLNLPTAQHELNMTK	CG7461-PA	1a	gi|24655582	1
AVNPDVEFYESK	CG7917-PA	1a	gi|17738283	1
AVNPLGEAVTTASMR	CG1915-PA,CG1915-PC	2b	gi|24655827,gi|161080703	0
AVNSEGESEPLVTDIPTK	CG32019-PA,CG32019-PC,CG32019-PD,CG32019-PE	2b	gi|28558739,gi|45552151,gi|45552153,gi|45552149	1
AVNSLCEVCNEASNDPK	CG6831-PA	1a	gi|21355751	1
AVPLALGLISASNPK	CG7762-PA	1a	gi|21356859	1
AVQQQLIDDHFLFK	CG32031-PA,CG32031-PB,CG32031-PC,CG32031-PD,CG32031-PE,CG32031-PF	2b	gi|24661336,gi|24661340,gi|24661344,gi|24661348,gi|161082598,gi|161082600	1
AVSFVGSDQAGK	CG17896-PA,CG17896-PB	2b	gi|24638878,gi|24638876	1
AVSSDDKIDTAPASQQMQQLNER	CG33715-PB,CG33715-PD	2a	gi|161076702,gi|161076705	1
AVSVASDTFISAAER	CG4097-PA	1a	gi|17737605	1
AVTTGSTSEATTTTTPVPR	CG6608-PA,CG6608-PB	1b	gi|21356397,gi|24645815	0
AVVAQFDAGELITQR	CG10691-PA,CG10691-PB	1b	gi|24585145,gi|24585147	1
AVVAVAGQGAAASNHK	CG4169-PA	1a	gi|24665395	1
AVVDESEDHSVADYYVSASAK	CG6944-PA	1a	gi|17136290	1
AVVGIWSCK	CG5827-PA,CG5827-PB	1b	gi|17864394,gi|24581863	1
AVVGTDGEEIVK	CG7008-PA	1a	gi|20130403	1
AVVLVEQPEQR	CG3940-PA	1a	gi|24645604	1
AVVQVFEGTSGIDAK	CG17369-PA,CG17369-PB	1b	gi|24646341,gi|17136796	1
AVVTELEEAIAK	CG12918-PA	1a	gi|20129845	1
AVYEAEFER	CG9579-PA	1a	gi|17136288	1
AYEGPAQGIK	CG11151-PA	1a	gi|18859687	1
AYEVLSDPQQR	CG8531-PA	1a	gi|19922238	1
AYNAAGEAVSSTAMK	CG1915-PA,CG1915-PC	2b	gi|24655827,gi|161080703	1
AYNAMGQDTTVAQLTVISK	CG1915-PA,CG1915-PC	2b	gi|24655827,gi|161080703	0
AYQEAFDIAK	CG17870-PA,CG17870-PB,CG17870-PC,CG17870-PF,CG17870-PG,CG17870-PH,CG17870-PI	2a	gi|24652326,gi|24652328,gi|45551063,gi|45551065,gi|28573324,gi|45552539,gi|62471697	1
AYVSPPEYSK	CG6524-PA	1a	gi|17986137	0
CAAGYVGDATR	CG33950-PA,CG33950-PB,CG33950-PC,CG33950-PD,CG33950-PE,CG33950-PF,CG33950-PG	2b	gi|78706472,gi|78706470,gi|78706464,gi|78706466,gi|78706468,gi|78706474,gi|161077537	1
CACVDVPFGGAK	CG5320-PA,CG5320-PB,CG5320-PF	2a	gi|45549226,gi|24649460,gi|45553475	1
CADHYQIDVGDVK	CG10157-PA	1a	gi|21355397	1
CAGVDVPMPYAK	CG11876-PA,CG11876-PD	1b	gi|24650940,gi|21358145	1
CALQEFK	CG7145-PA,CG7145-PB,CG7145-PD	1b	gi|24668413,gi|24668417,gi|24668425	1
CATITPDEK	CG7176-PA,CG7176-PB,CG7176-PC,CG7176-PD,CG7176-PE,CG7176-PF,CG7176-PG	2b	gi|24660860,gi|24660849,gi|21356561,gi|24660856,gi|24660864,gi|24660868,gi|28574947	1
CCFTIDIK	CG11314-PA,CG11315-PA,CG11315-PB	3b	gi|24651498,gi|21358239,gi|24651500	0
CCGADGPGDWATSR	CG6120-PA	1a	gi|17738195	0
CDGDCIVQSPSKPEKPTTPGSEK	CG1915-PA,CG1915-PC	2b	gi|24655827,gi|161080703	1
CDGENDCGDNSDETSCDPEPSGAPCR	CG33950-PA,CG33950-PB,CG33950-PC,CG33950-PD,CG33950-PE,CG33950-PF,CG33950-PG	2b	gi|78706472,gi|78706470,gi|78706464,gi|78706466,gi|78706468,gi|78706474,gi|161077537	0
CDIFIPAAVEK	CG5320-PA,CG5320-PB,CG5320-PE,CG5320-PF	2b	gi|45549226,gi|24649460,gi|45553473,gi|45553475	1
CDIGNPLESGK	CG9623-PA,CG9623-PB	2b	gi|24642643,gi|24642641	0
CDVDIR	CG10067-PA,CG12051-PA,CG18290-PA,CG18290-PB,CG4027-PA,CG4027-PB,CG4027-PC,CG4027-PD,CG5178-PA,CG7478-PA	3b	gi|17647135,gi|17647133,gi|17137090,gi|24646579,gi|24639997,gi|17530805,gi|62473526,gi|62473515,gi|17975545,gi|17975540	1
CDVIAEGIISATK	CG11963-PA,CG11963-PB	1b	gi|24645208,gi|161078106	1
CEAQWFSSEWSK	CG33103-PA,CG33103-PB	2b	gi|28572036,gi|28572038	0
CEEFQYGGCYGTNNR	CG33103-PA,CG33103-PB	2b	gi|28572036,gi|28572038	1
CEQCAAGYQGNPLAAGGICR	CG33950-PA,CG33950-PB,CG33950-PC,CG33950-PD,CG33950-PE,CG33950-PF,CG33950-PG	2b	gi|78706472,gi|78706470,gi|78706464,gi|78706466,gi|78706468,gi|78706474,gi|161077537	0
CFACGFPVEAGDR	CG30084-PA,CG30084-PC,CG30084-PE,CG30084-PF,CG30084-PG,CG30084-PH	2b	gi|78707559,gi|78709100,gi|78707228,gi|161077121,gi|116007706,gi|161077123	0
CFIVGADNVGSK	CG7490-PA	1a	gi|17737731	1
CFLDVGLAR	CG17489-PA,CG17489-PB,CG17489-PC,CG17489-PD,CG17489-PE	2b	gi|116007382,gi|116007384,gi|116007388,gi|116007390,gi|116007386	1
CFQNECLMQIESDQR	CG7596-PA	1a	gi|17738017	0
CGGAVFAAEQQLSK	CG1019-PA,CG1019-PB	1b	gi|17137134,gi|24644746	1
CGGAVFAAEQQLSKGKVWHK	CG1019-PA,CG1019-PB	1b	gi|17137134,gi|24644746	0
CGLGELSLPENEPGSSIMPGK	CG4094-PA,CG4094-PB	2b	gi|24640177,gi|24640179	1
CGSVFCGSNAICK	CG12908-PA,CG12908-PB	2b	gi|24652408,gi|45552547	0
CGVISPR	CG12324-PA,CG2033-PA,CG2033-PC,CG2033-PD,CG2033-PE	3b	gi|24652557,gi|24641743,gi|24641747,gi|17975567,gi|24641750	1
CGYTGEDGVEISVASSQAQK	CG6415-PA	1a	gi|20129441	1
CIADLSALALR	CG8189-PA,CG8189-PB	2b	gi|24661884,gi|24661888	1
CIEQATEHANNR	CG7461-PA	1a	gi|24655582	1
CIIPNEMK	CG17927-PA,CG17927-PB,CG17927-PC,CG17927-PD,CG17927-PE,CG17927-PF,CG17927-PG,CG17927-PH,CG17927-PI,CG17927-PJ,CG17927-PK,CG17927-PL,CG17927-PM	2b	gi|24584704,gi|24584710,gi|24584692,gi|24584702,gi|24584696,gi|24584700,gi|24584694,gi|28574239,gi|24584706,gi|24584698,gi|24584712,gi|24584714,gi|24584716	1
CLALAVADSPMKPDEMDLGDSTK	CG3725-PA,CG3725-PB,CG3725-PC,CG3725-PD,CG3725-PE,CG3725-PF,CG3725-PG,CG3725-PH	2b	gi|17136664,gi|24762445,gi|24762447,gi|24762449,gi|24762451,gi|24762453,gi|24762455,gi|24762457	1
CLDEALK	CG12262-PA	1a	gi|24660351	0
CLEAVGLDPDMYR	CG17927-PK	1a	gi|24584712	1
CLEVGPQLFESMNK	CG2233-PA	1a	gi|18921139	1
CLNPYDLQR	CG7910-PA	1a	gi|24644968	0
CLSQEPPAPTPPR	CG33103-PA,CG33103-PB	2b	gi|28572036,gi|28572038	1
CNAQLVESLQQK	CG30493-PB	1a	gi|24586344	1
CNEPAVWSQLAK	CG9012-PA,CG9012-PB,CG9012-PC,CG9012-PD,CG9012-PE,CG9012-PF	1b	gi|17137000,gi|24642310,gi|45555333,gi|45555323,gi|161077848,gi|161077850	1
CNETLDTQQK	CG17927-PA,CG17927-PB,CG17927-PC,CG17927-PD,CG17927-PE,CG17927-PF,CG17927-PG,CG17927-PH,CG17927-PI,CG17927-PJ,CG17927-PK,CG17927-PL,CG17927-PM	2b	gi|24584704,gi|24584710,gi|24584692,gi|24584702,gi|24584696,gi|24584700,gi|24584694,gi|28574239,gi|24584706,gi|24584698,gi|24584712,gi|24584714,gi|24584716	1
CNIYYR	CG7596-PA	1a	gi|17738017	0
CNSGQCVSSSVR	CG33950-PA,CG33950-PB,CG33950-PC,CG33950-PD,CG33950-PE,CG33950-PF,CG33950-PG	2b	gi|78706472,gi|78706470,gi|78706464,gi|78706466,gi|78706468,gi|78706474,gi|161077537	1
CNVNPAR	CG1475-PB	1a	gi|21357053	1
CPAVAAVGPVENLPDYNR	CG3731-PA,CG3731-PB	1b	gi|24646943,gi|21357875	1
CPDMRPQDSGAYSCEIINTR	CG33950-PA,CG33950-PB,CG33950-PC,CG33950-PD,CG33950-PE,CG33950-PF,CG33950-PG	2b	gi|78706472,gi|78706470,gi|78706464,gi|78706466,gi|78706468,gi|78706474,gi|161077537	1
CPEGYLGLSCEQCAPGYAR	CG33950-PA,CG33950-PB,CG33950-PC,CG33950-PD,CG33950-PE,CG33950-PF,CG33950-PG	2b	gi|78706472,gi|78706470,gi|78706464,gi|78706466,gi|78706468,gi|78706474,gi|161077537	1
CPETVASGLAHADGCSLDTR	CG7123-PA,CG7123-PB	1b	gi|17136294,gi|24582614	1
CPYGYELSEDSQR	CG12908-PA,CG12908-PB	2b	gi|24652408,gi|45552547	0
CQCKPGVTGDK	CG3322-PA	1a	gi|17737557	0
CQCPPGYVGDSCESCASGYVR	CG33950-PA,CG33950-PB,CG33950-PC,CG33950-PD,CG33950-PE,CG33950-PF,CG33950-PG	2b	gi|78706472,gi|78706470,gi|78706464,gi|78706466,gi|78706468,gi|78706474,gi|161077537	0
CQPVDYSTTGLAMR	CG31523-PA,CG31523-PB,CG31523-PC,CG31523-PD	1b	gi|21355477,gi|24644008,gi|28573236,gi|24644010	1
CQSFYYGGCGGNDNR	CG33103-PA,CG33103-PB	2b	gi|28572036,gi|28572038	0
CQVCMK	CG4145-PA,CG4145-PB,CG4145-PC	1b	gi|24581820,gi|24581822,gi|24581824	0
CQYNEILNEHSLNFK	CG33950-PA,CG33950-PC,CG33950-PD,CG33950-PE,CG33950-PF,CG33950-PG	2a	gi|78706472,gi|78706464,gi|78706466,gi|78706468,gi|78706474,gi|161077537	1
CSANLVVEER	CG1915-PA,CG1915-PC	2b	gi|24655827,gi|161080703	0
CSCYEAGTEQDEQSITR	CG3322-PA	1a	gi|17737557	1
CSEFTNEICAK	CG12233-PA,CG12233-PB	2b	gi|24643268,gi|24643270	1
CSLAVPEITK	CG2216-PA,CG2216-PB,CG2216-PC,CG2216-PD,CG2216-PE	2b	gi|17933722,gi|24651356,gi|24651358,gi|24651360,gi|24651362	1
CSLICDQGSELVEAK	CG1977-PA	1a	gi|17136504	1
CSSLPAK	CG4764-PA	1a	gi|19920498	0
CSSPELASNVVYK	CG9249-PA	1a	gi|24585589	1
CSVNIDIR	CG33103-PA,CG33103-PB	2b	gi|28572036,gi|28572038	0
CTACVKPITGIGGTR	CG32171-PA,CG32171-PB,CG32171-PC,CG32171-PD,CG32171-PE,CG32171-PF,CG32171-PG,CG32171-PH	2b	gi|45550635,gi|21356031,gi|24665618,gi|24665611,gi|45553169,gi|45553167,gi|45553165,gi|45553163	1
CTAIEFDNNQFK	CG11064-PA	1a	gi|24638795	1
CTTDHISAAGPWLK	CG4706-PA,CG9244-PB,CG9244-PC	3b	gi|28571643,gi|17864292,gi|161076999	1
CTYVQEFDGER	CG12908-PA,CG12908-PB	2b	gi|24652408,gi|45552547	0
CVDPNTGLIYFK	CG33484-PB,CG33484-PD	2a	gi|116007758,gi|116007762	0
CVELCQPER	CG10924-PA	1a	gi|24655082	1
CVETLNNAADR	CG7350-PA	1a	gi|17737595	0
CVGGEVGATSSLAPK	CG3195-PA,CG3195-PB,CG3195-PC	1b	gi|17864452,gi|24762533,gi|24762535	1
CVPFYYSGCGGNK	CG33103-PA,CG33103-PB	2b	gi|28572036,gi|28572038	0
CVSTLLDLIQTK	CG12532-PA	1a	gi|17647183	1
CVVCETTTR	CG16858-PA	1a	gi|17137252	1
CYENVFANTCEECNK	CG32171-PB,CG32171-PC,CG32171-PD,CG32171-PF,CG32171-PG,CG32171-PH	2a	gi|21356031,gi|24665618,gi|24665611,gi|45553167,gi|45553165,gi|45553163	0
CYQCDSLTNSECGK	CG9338-PA	1a	gi|24585535	0
CYQCESLTMPK	CG9336-PA	1a	gi|24585531	1
DAAAAALSFK	CG16935-PA	1a	gi|45550423	0
DAAENSLIAYK	CG31196-PA,CG31196-PB,CG31196-PC,CG31196-PD	2b	gi|24647885,gi|24647887,gi|24647891,gi|24647889	1
DAALENPGTVEELHK	CG12157-PA,CG12157-PB	1b	gi|24640397,gi|45554336	1
DAAPFDASQDAQVLR	CG9579-PA	1a	gi|17136288	1
DAASNQLIDYK	CG6871-PA	1a	gi|17981717	1
DAAVIGKPDEEAGELPLAFVVK	CG6178-PA	1a	gi|21355181	1
DACGGQELESALEEVR	CG6831-PA	1a	gi|21355751	1
DACSICDK	CG13220-PA	1a	gi|20129879	1
DADAAASGTVATDSDTTTDNDKNFENSEK	CG4538-PA,CG4538-PB	2b	gi|24648289,gi|24648291	1
DADAIVQQTLAK	CG3699-PA	1a	gi|23397609	1
DADDAVYELNGK	CG10851-PA,CG10851-PB,CG10851-PC,CG10851-PD,CG10851-PE,CG10851-PF	2a	gi|28571689,gi|28571691,gi|28571699,gi|28571693,gi|28571697,gi|28571695	1
DADEIENWIAEK	CG1977-PA	1a	gi|17136504	1
DADETVAWIAEK	CG1977-PA	1a	gi|17136504	1
DAEEVPMVLVGNK	CG9375-PA	1a	gi|17136430	1
DAEIDVPLVLAK	CG4954-PA	1a	gi|19922464	1
DAEMIENTLFR	CG33519-PB,CG33519-PC	2b	gi|161077453,gi|161077455	1
DAGLGLSSAAMER	CG7107-PF,CG7107-PG	2a	gi|62473664,gi|62473654	0
DAGNFLINGDLTLNQINQK	CG10236-PA	1a	gi|17136292	1
DAGNYEMITGYR	CG5320-PA,CG5320-PF	2a	gi|45549226,gi|45553475	1
DAGQIAGLNVLR	CG8542-PA	1a	gi|24653595	1
DAGTIAGLNVLR	CG4264-PA,CG4264-PB,CG4264-PC,CG4264-PD,CG4264-PE,CG4264-PF	1b	gi|17737967,gi|24647034,gi|24647036,gi|24647038,gi|28571719,gi|28571721	1
DAGVLGLSSAAMER	CG7107-PA,CG7107-PB,CG7107-PD,CG7107-PE	2a	gi|24641813,gi|24641811,gi|24641815,gi|62473677	1
DAHQSLLATR	CG1516-PA,CG1516-PB,CG1516-PD,CG1516-PE,CG1516-PG,CG1516-PI,CG1516-PJ,CG1516-PK,CG1516-PL	2b	gi|24652210,gi|24652212,gi|24652214,gi|19921944,gi|24652216,gi|24652218,gi|24652220,gi|24652222,gi|24652224	1
DAIETLLSLGEAK	CG5434-PA	1a	gi|24648453	1
DAILDGTHPVTQDK	CG6831-PA	1a	gi|21355751	1
DAIQQANSNIELAGQDLEK	CG7123-PA,CG7123-PB	1b	gi|17136294,gi|24582614	0
DALCQDLNGVLR	CG11720-PA	1a	gi|17737563	0
DALDYIDFTR	CG1977-PA	1a	gi|17136504	1
DALELFPMLK	CG8256-PA,CG8256-PB,CG8256-PC,CG8256-PD	1b	gi|24653942,gi|24653944,gi|20130025,gi|161077125	1
DALIEDQTAK	CG3523-PA	1a	gi|19920632	1
DALNELNSFNK	CG10236-PA	1a	gi|17136292	0
DALNSALDDELAR	CG11876-PA,CG11876-PB,CG11876-PC,CG11876-PD	2b	gi|24650940,gi|24650943,gi|24650945,gi|21358145	1
DALNSALDDELARDDR	CG11876-PA,CG11876-PB,CG11876-PC,CG11876-PD	2b	gi|24650940,gi|24650943,gi|24650945,gi|21358145	1
DALTVSNHK	CG32702-PA	1a	gi|24640838	0
DAPTTESYLR	CG6416-PA,CG6416-PB,CG6416-PE,CG6416-PF,CG6416-PG,CG6416-PH,CG6416-PI,CG6416-PJ	2b	gi|24661058,gi|45550577,gi|28574406,gi|28574408,gi|28574410,gi|28574412,gi|28574416,gi|45552078	1
DAPVVEKPGEELK	CG12935-PA	1a	gi|20129861	1
DASAFIVSR	CG9280-PA,CG9280-PB,CG9280-PC	1b	gi|17137794,gi|24582896,gi|24582898	1
DASESDSGVYTCVAYDVR	CG33950-PA,CG33950-PB,CG33950-PC,CG33950-PD,CG33950-PE,CG33950-PF,CG33950-PG	2b	gi|78706472,gi|78706470,gi|78706464,gi|78706466,gi|78706468,gi|78706474,gi|161077537	0
DASGYISSAELR	CG3201-PA	1a	gi|17530801	1
DASSDSGPDEQR	CG11771-PA	1a	gi|21356111	1
DASWVEQEETVVSK	CG4665-PA,CG4665-PB,CG4665-PC	1b	gi|17647337,gi|62472128,gi|62472140	1
DATENFEDVGHSNDAR	CG2140-PA,CG2140-PB	2b	gi|24586293,gi|24586291	1
DATFQLDNLK	CG10302-PA	1a	gi|24584970	1
DAVLLIFANK	CG8385-PA,CG8385-PB,CG8385-PC,CG8385-PD,CG8385-PE,CG8385-PF	1b	gi|24668762,gi|17136866,gi|24668769,gi|24668773,gi|24668777,gi|161085839	1
DAVSDLAQHFLDK	CG5525-PA	1a	gi|24583944	1
DAVTYTEHAK	CG31611-PA,CG3379-PA,CG3379-PB,CG3379-PC,CG33869-PA,CG33871-PA,CG33873-PA,CG33875-PA,CG33877-PA,CG33879-PA,CG33881-PA,CG33883-PA,CG33885-PA,CG33887-PA,CG33889-PA,CG33891-PA,CG33893-PA,CG33895-PA,CG33897-PA,CG33899-PA,CG33901-PA,CG33903-PA,CG33905-PA,CG33907-PA,CG33909-PA	3b	gi|24585675,gi|24646873,gi|24646875,gi|17975542,gi|78707154,gi|78707144,gi|78707134,gi|78707124,gi|78707114,gi|78707104,gi|78707094,gi|78707084,gi|78707074,gi|78707064,gi|78707054,gi|78707044,gi|78707034,gi|78707024,gi|78707014,gi|78707004,gi|78706994,gi|78706984,gi|78706976,gi|78706966,gi|78706958	1
DAVVITEDQALK	CG13392-PA	1a	gi|24582811	1
DCAIEGTQCTPGVCGAGR	CG33950-PA,CG33950-PC,CG33950-PD,CG33950-PE,CG33950-PF,CG33950-PG	2a	gi|78706472,gi|78706464,gi|78706466,gi|78706468,gi|78706474,gi|161077537	0
DCEDSNPLIR	CG12532-PA	1a	gi|17647183	1
DCELAESWMSAR	CG1977-PA	1a	gi|17136504	1
DCGDDDLCESNLIIR	CG1771-PA,CG1771-PB	2b	gi|24641711,gi|24641709	0
DCGECQPGYFNIR	CG3322-PA	1a	gi|17737557	1
DCSCVICGPGGEPCPGCSAR	CG6132-PA	1a	gi|24662704	0
DCSLGGGGGPGGVGGGGGGGGGGMR	CG3800-PA	1a	gi|24658883	1
DCTFADTMEMK	CG3972-PA	1a	gi|17933498	1
DCVIDLVGYR	CG11661-PA,CG11661-PB,CG11661-PC,CG11661-PE,CG11661-PF,CG11661-PG,CG11661-PH,CG11661-PI	2b	gi|24665669,gi|24665673,gi|24665677,gi|28574585,gi|28574590,gi|28574592,gi|161084450,gi|161084461	1
DCYVGDEAQSK	CG7478-PA	1a	gi|17975540	1
DDANHDPQWSEEQIVSAK	CG3989-PA	1a	gi|18860083	1
DDCLYENEDVK	CG3560-PA	1a	gi|24642430	1
DDDESEASDFAGFDSKP	CG6983-PA	1a	gi|21355797	1
DDDLHNPLIQLENNK	CG32702-PA	1a	gi|24640838	0
DDDNDDNDDDDDQDIR	CG17285-PA,CG17285-PB	2b	gi|24664081,gi|24664085	1
DDDVICTTEYSK	CG10236-PA	1a	gi|17136292	1
DDEVQVIR	CG6846-PA	1a	gi|21357853	1
DDFLQQNSYSSYDR	CG3762-PA,CG3762-PB,CG3762-PC	1b	gi|24583984,gi|24583986,gi|24583988	1
DDGGEPVESYLVEK	CG32019-PA,CG32019-PC,CG32019-PD,CG32019-PE	2b	gi|28558739,gi|45552151,gi|45552153,gi|45552149	1
DDGGIPITGYVIEK	CG32019-PA,CG32019-PC,CG32019-PD,CG32019-PE	2b	gi|28558739,gi|45552151,gi|45552153,gi|45552149	1
DDGGSEITHYVVEK	CG32019-PA,CG32019-PC,CG32019-PD,CG32019-PE	2b	gi|28558739,gi|45552151,gi|45552153,gi|45552149	1
DDGLGVENLR	CG11198-PA,CG11198-PB,CG11198-PC,CG11198-PD	2b	gi|24586458,gi|24586460,gi|161076407,gi|161076409	1
DDGYCVNCACDPVGSR	CG3322-PA	1a	gi|17737557	1
DDITNIPVK	CG32092-PB	1a	gi|24662922	0
DDLDDIDENDVGAK	CG3972-PA	1a	gi|17933498	1
DDLFDVIPEK	CG9099-PA	1a	gi|18859973	1
DDLFNVNAGIIK	CG7998-PA	1a	gi|24647881	1
DDNTQPFVLPSVR	CG4233-PA,CG4233-PB,CG4233-PC	2b	gi|24580970,gi|24580972,gi|19920542	1
DDRIPVDHNLALYEGPEQR	CG12140-PA	1a	gi|24652256	1
DDRIVIK	CG11330-PA	1a	gi|17647275	0
DDSCVNPLNLYVR	CG12840-PA	1a	gi|17737437	1
DDSSDCCPDYR	CG3074-PA,CG3074-PB	1b	gi|24657813,gi|24657819	0
DDTPVNLEQAENQLK	CG5870-PA	1a	gi|17647191	1
DDVPLYNNER	CG33103-PA,CG33103-PB	2b	gi|28572036,gi|28572038	0
DEASPYAAMLAAQDVAEK	CG1524-PA,CG1524-PB,CG1527-PA	3a	gi|24640451,gi|17975579,gi|17977696	1
DEDCTTNPSDSNSFYK	CG4999-PA,CG4999-PB,CG4999-PC	1b	gi|17648083,gi|24661201,gi|24661205	1
DEDIDGDGVPNSKDEDIDGDGK	CG9297-PA,CG9297-PB	2b	gi|28571703,gi|28571705	1
DEDLYPNPETFDPER	CG9438-PA	1a	gi|17647305	1
DEDTNYGYPQK	CG7111-PA	1a	gi|17137396	1
DEFSVENLQDFVEK	CG8983-PA,CG8983-PB	2b	gi|45551086,gi|19922048	1
DEIPDQYDWR	CG8947-PA	1a	gi|20428641	1
DEKPYCAECFGELFAK	CG32171-PA,CG32171-PB,CG32171-PC,CG32171-PD,CG32171-PE,CG32171-PF,CG32171-PG,CG32171-PH	2b	gi|45550635,gi|21356031,gi|24665618,gi|24665611,gi|45553169,gi|45553167,gi|45553165,gi|45553163	1
DELENKPFDYSK	CG6455-PA,CG6455-PB	2b	gi|45549224,gi|24648875	1
DENTAILEVDR	CG33950-PA,CG33950-PC,CG33950-PD,CG33950-PE,CG33950-PF,CG33950-PG	2a	gi|78706472,gi|78706464,gi|78706466,gi|78706468,gi|78706474,gi|161077537	0
DEQFSLFLPK	CG8193-PA	1a	gi|19921864	1
DESFFEK	CG6666-PA	1a	gi|45550736	0
DFAAGGISAAVSK	CG16944-PA,CG16944-PB,CG16944-PC,CG16944-PD	2b	gi|18079273,gi|24641095,gi|24641090,gi|24641092	1
DFANNELSGNAAK	CG4703-PA	1a	gi|21356377	1
DFDAVGFVK	CG16944-PA,CG16944-PB,CG16944-PC,CG16944-PD	2b	gi|18079273,gi|24641095,gi|24641090,gi|24641092	1
DFENAEDVNK	CG3911-PA	1a	gi|45550579	1
DFGEETPALDVVK	CG11271-PB,CG11271-PC	1b	gi|24663646,gi|116008170	1
DFLDPQGIWGPNVK	CG1333-PA,CG1333-PB	1b	gi|45551512,gi|24657303	1
DFLIEQER	CG30498-PA	1a	gi|24586303	1
DFMIQGGDFTK	CG2852-PA	1a	gi|20130249	1
DFNEWFGDAK	CG33715-PB,CG33715-PD	2a	gi|161076702,gi|161076705	0
DFPGADVILGQLK	CG6415-PA	1a	gi|20129441	1
DFPGADVILGQLKEGVSRR	CG6415-PA	1a	gi|20129441	0
DFPIANEPILGYLK	CG7145-PA,CG7145-PB,CG7145-PD	1b	gi|24668413,gi|24668417,gi|24668425	1
DFSPAEEEQVR	CG16983-PA,CG16983-PB,CG16983-PC,CG16983-PD,CG16983-PE,CG16983-PF,CG16983-PG,CG16983-PH	1b	gi|17137600,gi|24638934,gi|24638936,gi|24638938,gi|24638940,gi|24638942,gi|24638944,gi|85724772	1
DFVYNEEELAAGK	CG8048-PA,CG8048-PB,CG8048-PC,CG8048-PD	2b	gi|17137392,gi|19549828,gi|24654128,gi|28573773	1
DFYNIVDVMR	CG3835-PA,CG3835-PB,CG3835-PC	1b	gi|18921117,gi|24639275,gi|24639277	1
DGAISEASDAK	CG3612-PA	1a	gi|24658560	1
DGDALLYFVK	CG5554-PA	1a	gi|20130317	1
DGDTVKPGQALFK	CG5214-PA	1a	gi|24645909	1
DGENIESGGHYTVEVK	CG32019-PA,CG32019-PC,CG32019-PD,CG32019-PE	2b	gi|28558739,gi|45552151,gi|45552153,gi|45552149	1
DGGGTFADIIGR	CG32702-PA	1a	gi|24640838	1
DGGSPITNYIIEVMDK	CG32019-PA,CG32019-PC,CG32019-PD,CG32019-PE	2b	gi|28558739,gi|45552151,gi|45552153,gi|45552149	1
DGIKDVISVR	CG2233-PA	1a	gi|18921139	1
DGINEFLR	CG5809-PA	1a	gi|19921434	1
DGIPMLDTGESPEAPQPR	CG1709-PA,CG1709-PB,CG1709-PC,CG1709-PD,CG1709-PE,CG1709-PF,CG1709-PG,CG1709-PH	2b	gi|24650959,gi|24650965,gi|24650956,gi|24650967,gi|21358171,gi|24650961,gi|24650963,gi|45551995	1
DGISEVFDK	CG9244-PB,CG9244-PC	2b	gi|17864292,gi|161076999	1
DGISGSINEGFDR	CG12843-PA	1a	gi|24586157	0
DGISIQTNSDYK	CG33484-PA,CG33484-PB,CG33484-PC,CG33484-PD	2b	gi|45580802,gi|116007758,gi|116007760,gi|116007762	0
DGIVLPDIQDDIPR	CG18617-PA,CG18617-PB	1b	gi|24647955,gi|21357019	1
DGIWLCK	CG5023-PA	1a	gi|21356183	0
DGLDTPVDVGQAK	CG9579-PA	1a	gi|17136288	1
DGNELLAQLEELEK	CG33484-PA,CG33484-PB,CG33484-PC,CG33484-PD	2b	gi|45580802,gi|116007758,gi|116007760,gi|116007762	1
DGNLTLGTGVVTSTLPPLTESQR	CG6050-PA	1a	gi|17864358	1
DGPDDTGNYYTRPGK	CG4769-PA	1a	gi|24658292	1
DGPILQDGVNK	CG17246-PA,CG17246-PB,CG17246-PC	1b	gi|17137288,gi|24655642,gi|24655647	1
DGPLALYR	CG3057-PA,CG3057-PB,CG3057-PC,CG3057-PD	1b	gi|17137310,gi|45552191,gi|45552189,gi|45552187	0
DGPNALTPPK	CG5670-PA,CG5670-PB,CG5670-PC,CG5670-PD,CG5670-PE,CG5670-PF,CG5670-PG,CG5670-PH	2b	gi|24648576,gi|24648578,gi|24648580,gi|24648582,gi|45553441,gi|45553439,gi|45553437,gi|45553435	1
DGQATPWGIR	CG6416-PB,CG6416-PF	2a	gi|45550577,gi|28574408	0
DGQPVVETNNVK	CG33519-PB,CG33519-PC	2b	gi|161077453,gi|161077455	1
DGQVLCK	CG4696-PA,CG4696-PB	1b	gi|17136346,gi|62471709	1
DGSILIEGCGK	CG15203-PA	1a	gi|24641174	0
DGTFDLDSASLFGCK	CG10236-PA	1a	gi|17136292	1
DGVTSPAGSTAAALR	CG5840-PA,CG5840-PB	2b	gi|21358587,gi|24647700	1
DGWLLVR	CG30483-PA	1a	gi|24653538	0
DHQQDVDEEQAAIVNQPYR	CG6416-PB,CG6416-PE,CG6416-PF	2a	gi|45550577,gi|28574406,gi|28574408	1
DHSVYLTNDGR	CG4233-PA,CG4233-PB,CG4233-PC	2b	gi|24580970,gi|24580972,gi|19920542	1
DIAAYIK	CG6998-PA,CG6998-PB,CG6998-PC,CG6998-PD	1b	gi|17933574,gi|24639734,gi|24639736,gi|24639738	1
DIADEESWIK	CG1977-PA	1a	gi|17136504	1
DIDFFNDETK	CG6821-PA	1a	gi|17647601	1
DIEDLELNVQK	CG17927-PA,CG17927-PB,CG17927-PC,CG17927-PD,CG17927-PE,CG17927-PF,CG17927-PG,CG17927-PH,CG17927-PI,CG17927-PJ,CG17927-PK,CG17927-PL,CG17927-PM	2b	gi|24584704,gi|24584710,gi|24584692,gi|24584702,gi|24584696,gi|24584700,gi|24584694,gi|28574239,gi|24584706,gi|24584698,gi|24584712,gi|24584714,gi|24584716	1
DIFEDLYNK	CG7176-PA,CG7176-PB,CG7176-PC,CG7176-PD,CG7176-PE,CG7176-PF,CG7176-PG	2b	gi|24660860,gi|24660849,gi|21356561,gi|24660856,gi|24660864,gi|24660868,gi|28574947	1
DIGGLEYEAEYPYK	CG12163-PA,CG12163-PB	2b	gi|24644155,gi|24644153	1
DIGSSPELVR	CG30008-PA	1a	gi|24652244	0
DIITGDEMFADTYK	CG4800-PA	1a	gi|24645861	1
DILVQYDR	CG4046-PA	1a	gi|19922746	1
DINELTESIYIPK	CG3762-PA,CG3762-PB,CG3762-PC	1b	gi|24583984,gi|24583986,gi|24583988	1
DINLVAISPLK	CG1371-PA	1a	gi|20129847	1
DIPGLTDTTIPR	CG10944-PA,CG10944-PB,CG10944-PC	2b	gi|24640437,gi|17737290,gi|24640435	1
DIQAITFEGAK	CG12157-PA,CG12157-PB	1b	gi|24640397,gi|45554336	1
DIQLAR	CG31613-PA,CG33803-PA,CG33806-PA,CG33809-PA,CG33812-PA,CG33815-PA,CG33818-PA,CG33821-PA,CG33824-PA,CG33827-PA,CG33830-PA,CG33833-PA,CG33836-PA,CG33839-PA,CG33842-PA,CG33845-PA,CG33848-PA,CG33851-PA,CG33854-PA,CG33857-PA,CG33860-PA,CG33863-PA,CG33866-PA,CG5825-PA,CG8989-PA,CG8989-PB,CG8989-PC	3b	gi|24585677,gi|78706960,gi|78706968,gi|78706978,gi|78706986,gi|78706996,gi|78707006,gi|78707016,gi|78707026,gi|78707036,gi|78707046,gi|78707056,gi|78707066,gi|78707076,gi|78707086,gi|78707096,gi|78707106,gi|78707116,gi|78707126,gi|78707136,gi|78707146,gi|78707156,gi|78707164,gi|17647507,gi|17530867,gi|24640743,gi|28571378	0
DIQTALEEEQR	CG17927-PA,CG17927-PB,CG17927-PC,CG17927-PD,CG17927-PE,CG17927-PF,CG17927-PG,CG17927-PH,CG17927-PI,CG17927-PJ,CG17927-PK,CG17927-PL,CG17927-PM	2b	gi|24584704,gi|24584710,gi|24584692,gi|24584702,gi|24584696,gi|24584700,gi|24584694,gi|28574239,gi|24584706,gi|24584698,gi|24584712,gi|24584714,gi|24584716	1
DITTTFDGTTAR	CG32019-PA,CG32019-PC,CG32019-PD,CG32019-PE	2b	gi|28558739,gi|45552151,gi|45552153,gi|45552149	1
DIVEVPK	CG3944-PA	1a	gi|17864306	0
DIVHSGLDYTMER	CG5320-PA,CG5320-PB,CG5320-PE,CG5320-PF	2b	gi|45549226,gi|24649460,gi|45553473,gi|45553475	1
DKADLDGQLTK	CG31884-PA,CG31884-PB	1b	gi|17648013,gi|24583090	1
DKELSSITAK	CG17927-PA,CG17927-PB,CG17927-PC,CG17927-PD,CG17927-PE,CG17927-PF,CG17927-PG,CG17927-PH,CG17927-PI,CG17927-PJ,CG17927-PK,CG17927-PL,CG17927-PM	2b	gi|24584704,gi|24584710,gi|24584692,gi|24584702,gi|24584696,gi|24584700,gi|24584694,gi|28574239,gi|24584706,gi|24584698,gi|24584712,gi|24584714,gi|24584716	1
DKENFQNIR	CG9258-PA	1a	gi|17137210	1
DKFQNIGAK	CG12101-PA,CG12101-PB,CG7235-PA,CG7235-PB,CG7235-PC	3b	gi|24641191,gi|24641193,gi|45550935,gi|45550936,gi|45550132	1
DKIDSASNIR	CG6579-PA	1a	gi|24583867	0
DKLNNQVLFDK	CG6684-PA,CG6684-PB	1b	gi|24645865,gi|24645867	1
DKPLTPNSLVPLEYEPEDK	CG6803-PA,CG6803-PB,CG6803-PC,CG6803-PD,CG6803-PE	2b	gi|24646989,gi|21357797,gi|24646991,gi|24646986,gi|24646984	1
DKTEDQVTIDCAEAIK	CG7176-PA,CG7176-PB,CG7176-PC,CG7176-PD,CG7176-PE,CG7176-PF,CG7176-PG	2b	gi|24660860,gi|24660849,gi|21356561,gi|24660856,gi|24660864,gi|24660868,gi|28574947	1
DKVDPDLINAGK	CG1140-PA,CG1140-PB	2b	gi|21358325,gi|24655794	1
DLAEANLPENR	CG1637-PC	1a	gi|20129007	1
DLAFVDTDDNTPLK	CG40084-PA,CG40084-PB	2b	gi|161076014,gi|161076016	1
DLAPGYNDLLLLPEGATNIR	CG33103-PA,CG33103-PB	2b	gi|28572036,gi|28572038	1
DLASVQNLMK	CG1977-PA	1a	gi|17136504	1
DLDECQTNNGGCSLSPK	CG32702-PA	1a	gi|24640838	0
DLDFLQDPK	CG9688-PA	1a	gi|24651373	0
DLDKDGYLNEEEVK	CG9148-PA,CG9148-PB,CG9148-PC	2b	gi|17137602,gi|17137604,gi|45552855	1
DLDQYTK	CG4389-PA,CG4389-PB,CG4389-PC	2b	gi|19921000,gi|24583077,gi|24583079	1
DLEAIVQPVIAK	CG4147-PA,CG4147-PB,CG4147-PC,CG4147-PD	1b	gi|24641402,gi|24641404,gi|24641406,gi|24641408	1
DLEDEAAWIR	CG1977-PA	1a	gi|17136504	1
DLEEANIQHESTLANLR	CG17927-PA,CG17927-PB,CG17927-PC,CG17927-PD,CG17927-PE,CG17927-PF,CG17927-PG,CG17927-PH,CG17927-PI,CG17927-PJ,CG17927-PK,CG17927-PL,CG17927-PM	2b	gi|24584704,gi|24584710,gi|24584692,gi|24584702,gi|24584696,gi|24584700,gi|24584694,gi|28574239,gi|24584706,gi|24584698,gi|24584712,gi|24584714,gi|24584716	1
DLEEDHACIPLKK	CG2238-PA,CG2238-PB,CG2238-PC	2b	gi|24585709,gi|24585711,gi|24585713	1
DLEEIEQVFR	CG33715-PB,CG33715-PD	2a	gi|161076702,gi|161076705	1
DLELELEEEK	CG5939-PA,CG5939-PB,CG5939-PC,CG5939-PD	2b	gi|24661112,gi|24661116,gi|24661120,gi|24661124	1
DLEPISAASLAA	CG17331-PA	1a	gi|20129563	1
DLGEVGQAIAPGESSIDLK	CG7765-PA	1a	gi|17136240	1
DLGGQSTTQDFTR	CG6439-PA	1a	gi|24648872	1
DLGLASGVANASNSPIPLGSLAHK	CG15093-PA,CG15093-PB	1b	gi|24655230,gi|19922568	1
DLGPQIGWK	CG10849-PA	1a	gi|24657023	1
DLGQDVDTGR	CG17285-PA,CG17285-PB	2b	gi|24664081,gi|24664085	1
DLGVDTSPR	CG7834-PA,CG7834-PB	1b	gi|24651145,gi|24651147	1
DLIFPK	CG5903-PA	1a	gi|21357927	0
DLIGVQNLIK	CG1977-PA	1a	gi|17136504	1
DLIINNYQVAR	CG4123-PA,CG4123-PB	1b	gi|24665368,gi|24665372	1
DLIQSTEYPPSAESQAK	CG2109-PA	1a	gi|21357105	1
DLISDLK	CG5730-PA,CG5730-PB,CG5730-PC,CG5730-PD	2b	gi|17136266,gi|17136264,gi|45553447,gi|45553445	1
DLISNVLK	CG3523-PA	1a	gi|19920632	1
DLITNIGSGVGAAPAGGAAPAAAAAAPAAESK	CG4087-PA	1a	gi|17136320	1
DLLDQIGEGGR	CG17927-PA,CG17927-PB,CG17927-PC,CG17927-PD,CG17927-PE,CG17927-PF,CG17927-PG,CG17927-PH,CG17927-PI,CG17927-PJ,CG17927-PK,CG17927-PL,CG17927-PM	2b	gi|24584704,gi|24584710,gi|24584692,gi|24584702,gi|24584696,gi|24584700,gi|24584694,gi|28574239,gi|24584706,gi|24584698,gi|24584712,gi|24584714,gi|24584716	1
DLLEPYPALR	CG8938-PA,CG8938-PB,CG8938-PC	1b	gi|24654347,gi|24654349,gi|24654351	1
DLLHPLPAEEK	CG10423-PA	1a	gi|24649976	1
DLLISVVGGDIIK	CG33519-PB,CG33519-PC	2b	gi|161077453,gi|161077455	0
DLLLIHEEGK	CG32702-PA	1a	gi|24640838	0
DLLQQVNPPK	CG17927-PA,CG17927-PB,CG17927-PD,CG17927-PF,CG17927-PH,CG17927-PI,CG17927-PK,CG17927-PL,CG17927-PM	2a	gi|24584704,gi|24584710,gi|24584702,gi|24584700,gi|28574239,gi|24584706,gi|24584712,gi|24584714,gi|24584716	1
DLLSPSPNLPISSIVR	CG6803-PB,CG6803-PD	2a	gi|21357797,gi|24646986	1
DLMQLEVFR	CG3524-PA	1a	gi|24581345	0
DLNAVVDGPFPEALDQAR	CG5112-PA	1a	gi|21356731	1
DLNDFGAVNEVYK	CG15261-PA	1a	gi|19921376	1
DLNDLQTVYLNK	CG7123-PA,CG7123-PB	1b	gi|17136294,gi|24582614	1
DLNLNMPVVVR	CG11963-PA,CG11963-PB	1b	gi|24645208,gi|161078106	1
DLNPDVNAFQR	CG1709-PA,CG1709-PB,CG1709-PC,CG1709-PD,CG1709-PE,CG1709-PF,CG1709-PG	2a	gi|24650959,gi|24650965,gi|24650956,gi|24650967,gi|21358171,gi|24650961,gi|24650963	1
DLPAITDFINK	CG1837-PA	1a	gi|18859803	1
DLPGALDETGLIER	CG7891-PA	1a	gi|21355085	1
DLPLLLEIMAGDK	CG7910-PA	1a	gi|24644968	0
DLQNVNITLR	CG10691-PA,CG10691-PB	1b	gi|24585145,gi|24585147	1
DLRDEEGYLR	CG8200-PA	1a	gi|17137546	1
DLSEFADEDQAK	CG11989-PA,CG11989-PB,CG11989-PC,CG11989-PD,CG11989-PE	1b	gi|24662081,gi|24662085,gi|24662089,gi|24662093,gi|24662097	1
DLSHADAQQLFR	CG6416-PB,CG6416-PE,CG6416-PF	2a	gi|45550577,gi|28574406,gi|28574408	0
DLSTVQTLLTK	CG1977-PA	1a	gi|17136504	1
DLSVVQNDLK	CG34445-PA	1a	gi|161077401	0
DLTALQATIR	CG4307-PA	1a	gi|24647054	1
DLTDYLMK	CG10067-PA,CG12051-PA,CG18290-PA,CG18290-PB,CG4027-PA,CG4027-PB,CG4027-PC,CG4027-PD,CG5178-PA,CG7478-PA	3b	gi|17647135,gi|17647133,gi|17137090,gi|24646579,gi|24639997,gi|17530805,gi|62473526,gi|62473515,gi|17975545,gi|17975540	1
DLTQAALR	CG12740-PA,CG12740-PB,CG12740-PD	1b	gi|24656625,gi|24656628,gi|24656632	1
DLTSVQNLQK	CG1977-PA	1a	gi|17136504	0
DLTVGGAVTQCYR	CG6510-PA	1a	gi|17647885	1
DLVFITHPDQR	CG2238-PA,CG2238-PB,CG2238-PC	2b	gi|24585709,gi|24585711,gi|24585713	1
DLVPDMNNFYEQYR	CG3283-PA	1a	gi|17137106	1
DLVTGESESVDINGK	CG15825-PA,CG15825-PB	2b	gi|24585183,gi|20129625	1
DLVTGESESVDINGKR	CG15825-PA,CG15825-PB	2b	gi|24585183,gi|20129625	1
DLYANIVMSGGTTMYPGIADR	CG10067-PA,CG18290-PA,CG18290-PB	3b	gi|17647135,gi|17137090,gi|24646579	1
DLYANNVLSGGTTMYPGIADR	CG7478-PA	1a	gi|17975540	1
DLYSPPSNTAILK	CG33950-PA,CG33950-PB,CG33950-PC,CG33950-PD,CG33950-PE,CG33950-PF,CG33950-PG	2b	gi|78706472,gi|78706470,gi|78706464,gi|78706466,gi|78706468,gi|78706474,gi|161077537	1
DMAGLLKPESAR	CG1516-PA,CG1516-PB,CG1516-PD,CG1516-PE,CG1516-PG,CG1516-PI,CG1516-PJ,CG1516-PK,CG1516-PL	2b	gi|24652210,gi|24652212,gi|24652214,gi|19921944,gi|24652216,gi|24652218,gi|24652220,gi|24652222,gi|24652224	1
DMQALQDSFDQIK	CG33715-PB,CG33715-PD	2a	gi|161076702,gi|161076705	0
DMQDILNDLK	CG5703-PA	1a	gi|18859877	1
DMTVIAGDEFR	CG32019-PA,CG32019-PC,CG32019-PD,CG32019-PE	2b	gi|28558739,gi|45552151,gi|45552153,gi|45552149	0
DNAIDKADTCENQAK	CG4843-PA,CG4843-PB,CG4843-PC	2b	gi|28571726,gi|24647095,gi|45551906	1
DNDGHLALGK	CG8938-PA,CG8938-PB,CG8938-PC	1b	gi|24654347,gi|24654349,gi|24654351	1
DNDLLELPR	CG9031-PA	1a	gi|45550188	1
DNDNATINCAAR	CG5550-PA	1a	gi|24654259	0
DNECELSR	CG6120-PA	1a	gi|17738195	0
DNECTVTHSR	CG6579-PA	1a	gi|24583867	1
DNEIAIIGFFK	CG6988-PA	1a	gi|17647799	1
DNGGIDTEK	CG6692-PA,CG6692-PB,CG6692-PC	2b	gi|24653516,gi|24653518,gi|24653514	1
DNIFEEK	CG41128-PA	1a	gi|161076204	1
DNIQGITKPAIR	CG31611-PA,CG3379-PA,CG3379-PB,CG3379-PC,CG33869-PA,CG33871-PA,CG33873-PA,CG33875-PA,CG33877-PA,CG33879-PA,CG33881-PA,CG33883-PA,CG33885-PA,CG33887-PA,CG33889-PA,CG33891-PA,CG33893-PA,CG33895-PA,CG33897-PA,CG33899-PA,CG33901-PA,CG33903-PA,CG33905-PA,CG33907-PA,CG33909-PA	3b	gi|24585675,gi|24646873,gi|24646875,gi|17975542,gi|78707154,gi|78707144,gi|78707134,gi|78707124,gi|78707114,gi|78707104,gi|78707094,gi|78707084,gi|78707074,gi|78707064,gi|78707054,gi|78707044,gi|78707034,gi|78707024,gi|78707014,gi|78707004,gi|78706994,gi|78706984,gi|78706976,gi|78706966,gi|78706958	1
DNLKDNECELSR	CG6120-PA	1a	gi|17738195	1
DNLVSVTEGHK	CG2139-PA,CG2139-PB,CG2139-PC,CG2139-PD	2b	gi|24651389,gi|45552009,gi|24651387,gi|24651391	1
DNPANFGYGCGR	CG14413-PA	1a	gi|17986025	1
DNPGVYSGQWQGR	CG9629-PA	1a	gi|24666674	1
DNPLENLNTAFDVAEK	CG4376-PA,CG4376-PB,CG4376-PC	2b	gi|24639238,gi|24639240,gi|17137758	1
DNSGDGGQTYAEVIDDLHK	CG3322-PA	1a	gi|17737557	1
DNTYMIGISDLAEK	CG7106-PA	1a	gi|21357549	1
DPAQTLGGDFNAAK	CG11661-PI	1a	gi|161084461	0
DPDTIISASR	CG7111-PA	1a	gi|17137396	1
DPDTLEAPDDFIDTINR	CG6042-PA	1a	gi|24648130	1
DPEEAEKEEAAAK	CG14792-PA,CG14792-PB,CG14792-PD	2b	gi|17136518,gi|24639112,gi|45551198	1
DPEGGIYLGLCRPCECNGHSK	CG33950-PA,CG33950-PB,CG33950-PC,CG33950-PD,CG33950-PE,CG33950-PF,CG33950-PG	2b	gi|78706472,gi|78706470,gi|78706464,gi|78706466,gi|78706468,gi|78706474,gi|161077537	0
DPETTSVSNSPTGGVEEAK	CG8042-PA	1a	gi|21356345	1
DPFDEPNKPGTPEVTDYDNQSISLK	CG32019-PA,CG32019-PC,CG32019-PD,CG32019-PE	2b	gi|28558739,gi|45552151,gi|45552153,gi|45552149	1
DPFFYTFYK	CG6821-PA	1a	gi|17647601	1
DPFSVYR	CG3283-PA	1a	gi|17137106	1
DPIAGVVPLQPAPNR	CG3415-PA	1a	gi|18859837	1
DPILFPSFIHTQK	CG6871-PA	1a	gi|17981717	1
DPITSFK	CG7010-PA,CG7010-PB,CG7010-PC,CG7010-PD	2b	gi|28571106,gi|24639746,gi|24639740,gi|24639744	1
DPLDVSFNDPIAAFK	CG1417-PA,CG1417-PB,CG1417-PD,CG1417-PE,CG1417-PF,CG1417-PG,CG1417-PH	2a	gi|24643717,gi|24643721,gi|24643719,gi|24643715,gi|45556180,gi|45556169,gi|45556158	1
DPLNDTVVDQFK	CG17927-PA,CG17927-PB,CG17927-PC,CG17927-PD,CG17927-PE,CG17927-PF,CG17927-PG,CG17927-PH,CG17927-PI,CG17927-PJ,CG17927-PK,CG17927-PL,CG17927-PM	2b	gi|24584704,gi|24584710,gi|24584692,gi|24584702,gi|24584696,gi|24584700,gi|24584694,gi|28574239,gi|24584706,gi|24584698,gi|24584712,gi|24584714,gi|24584716	1
DPNEAIPESNPNDQTPTAGLK	CG4104-PA	1a	gi|19920676	1
DPNGLLFSVHGK	CG10236-PA	1a	gi|17136292	1
DPNTGVATTDLYGK	CG6438-PA	1a	gi|17136192	1
DPQQTTLCGVK	CG32702-PA	1a	gi|24640838	0
DPSGDVIEDLEGER	CG9432-PB,CG9432-PD,CG9432-PE	2a	gi|24586058,gi|116007558,gi|116007556	1
DPSILSVPGLADR	CG3132-PA	1a	gi|24646169	1
DPTATKPEDWDDR	CG9429-PA	1a	gi|24645441	1
DPVFEVLLR	CG17560-PA	1a	gi|24647494	0
DPVSILVK	CG9075-PA,CG9075-PB,CG9075-PC,CG9075-PD	1b	gi|24582075,gi|24582078,gi|17136248,gi|24582080	1
DPYSHPDKPGQPQATDWGK	CG32019-PA,CG32019-PC,CG32019-PD,CG32019-PE	2b	gi|28558739,gi|45552151,gi|45552153,gi|45552149	1
DQAAAAAEEK	CG12818-PA	1a	gi|24645661	1
DQFAALVR	CG32593-PA,CG32593-PB,CG32593-PC,CG32593-PE,CG32593-PF	2a	gi|24642027,gi|24642031,gi|24642061,gi|24642029,gi|24642033	0
DQGLNVLFNNAGIAPK	CG10964-PA	1a	gi|24640547	1
DQIEDTTSEYEK	CG12101-PA,CG12101-PB	1b	gi|24641191,gi|24641193	1
DQIEDTTSEYEKEK	CG12101-PA,CG12101-PB	1b	gi|24641191,gi|24641193	1
DQLIVFHSSK	CG7438-PA,CG7438-PB	1b	gi|17647709,gi|24583459	1
DQPFASDDIR	CG1977-PA	1a	gi|17136504	1
DQPFTFQLGAGQVIK	CG9847-PA,CG9847-PB	2b	gi|17352457,gi|24657035	1
DQPGLVTWLK	CG33519-PB,CG33519-PC	2b	gi|161077453,gi|161077455	0
DQQILEPFPYSPATSR	CG33484-PA,CG33484-PB,CG33484-PC,CG33484-PD	2b	gi|45580802,gi|116007758,gi|116007760,gi|116007762	1
DQTAEETAVLVQK	CG1982-PA	1a	gi|17137530	1
DQTFAEALSEPGLVFVAAK	CG1548-PA	1a	gi|21355083	1
DQTLANELR	CG4376-PA,CG4376-PB,CG4376-PC	2b	gi|24639238,gi|24639240,gi|17137758	1
DQTLASLRPTLDYSDFK	CG4389-PA,CG4389-PB,CG4389-PC	2b	gi|19921000,gi|24583077,gi|24583079	1
DQVEQEREEQPDEDQGEEYER	CG9280-PA,CG9280-PB,CG9280-PC	1b	gi|17137794,gi|24582896,gi|24582898	1
DQVFEVLLNK	CG10097-PB	1a	gi|78706758	0
DQVHTQELTETR	CG10119-PA	1a	gi|24653664	1
DQVSNSAFVER	CG1242-PA	1a	gi|17647529	1
DQVTSTFGR	CG33950-PA,CG33950-PB,CG33950-PC,CG33950-PD,CG33950-PE,CG33950-PF,CG33950-PG	2b	gi|78706472,gi|78706470,gi|78706464,gi|78706466,gi|78706468,gi|78706474,gi|161077537	1
DRDELIEEFSK	CG17838-PC	1a	gi|161078446	1
DRESVQFQNLQK	CG33950-PF	1a	gi|78706474	1
DRTEVPSVGVAKPSEPELPK	CG9066-PA	1a	gi|18859969	1
DSAQDYLDIK	CG12840-PA	1a	gi|17737437	1
DSDLVVACAPR	CG9623-PB	1a	gi|24642641	0
DSHGVAQVR	CG13389-PA,CG13389-PB	1b	gi|17136832,gi|85724904	1
DSLEGYVNETAK	CG8843-PA	1a	gi|19920648	0
DSLTCEVENGGSLGSR	CG7070-PA,CG7070-PB	2b	gi|28571814,gi|24648964	1
DSLYTVGPAYSLNR	CG3074-PA,CG3074-PB	1b	gi|24657813,gi|24657819	1
DSQGHVFATR	CG11276-PA,CG11276-PB	1b	gi|24663668,gi|24663672	1
[truncated: 4,284 more rows]
